# Supplementary material
Source: Research Square preprint supplement (doi:10.21203/rs.3.rs-9621447/v1)
Supplement: Supplementary file 1 [file 7b0c270160d31b034d8b77e6.pdf]

Figure. 2A

WB: AR

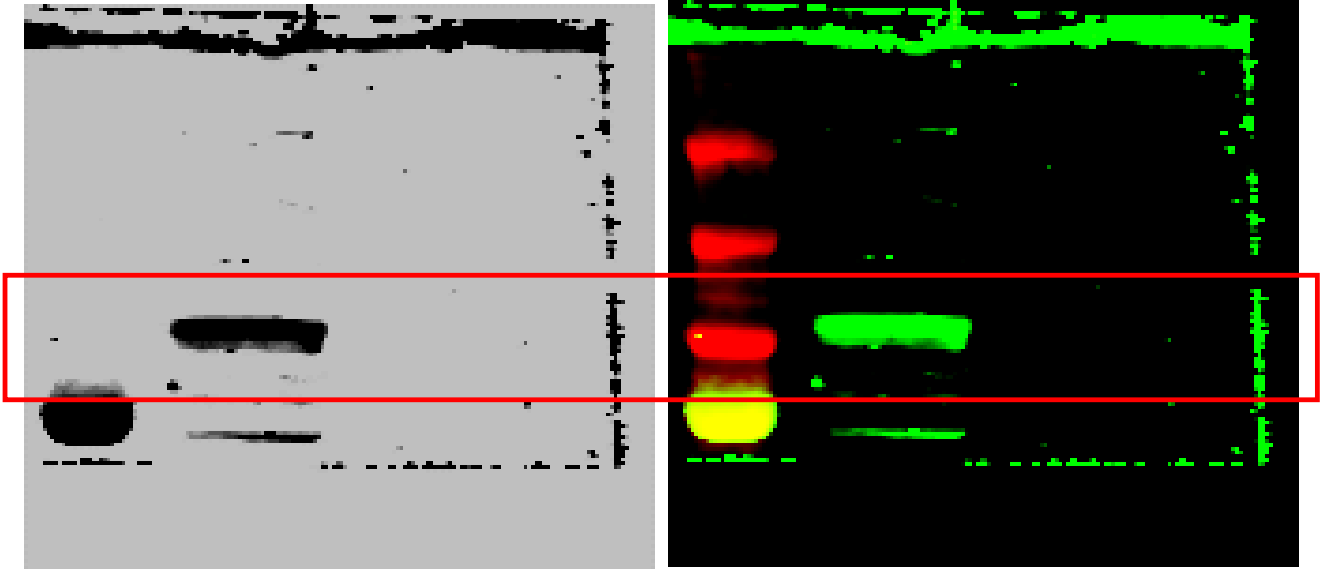

WB: DUOX1

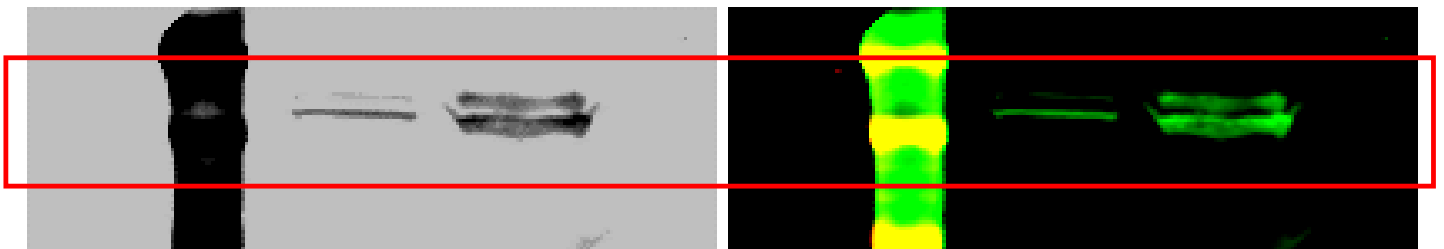

WB: GAPDH

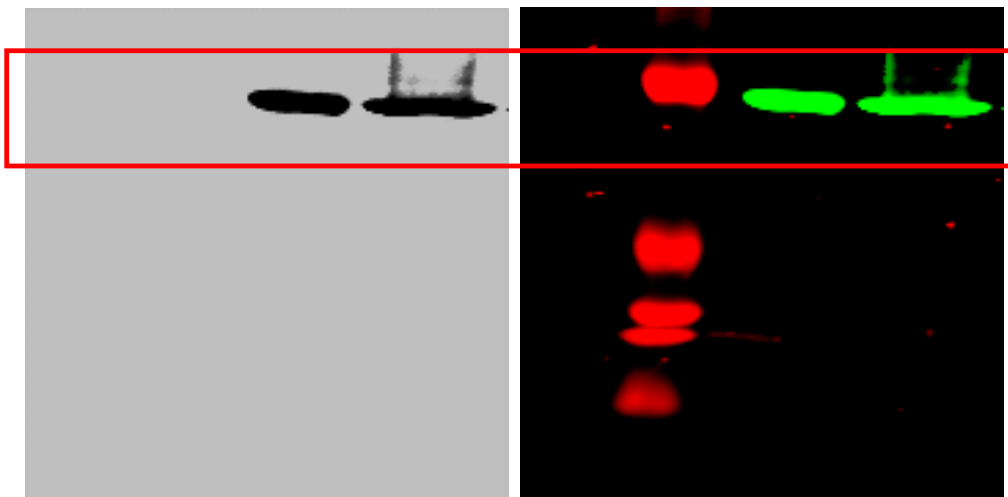

Figure. 2E

WB: AR

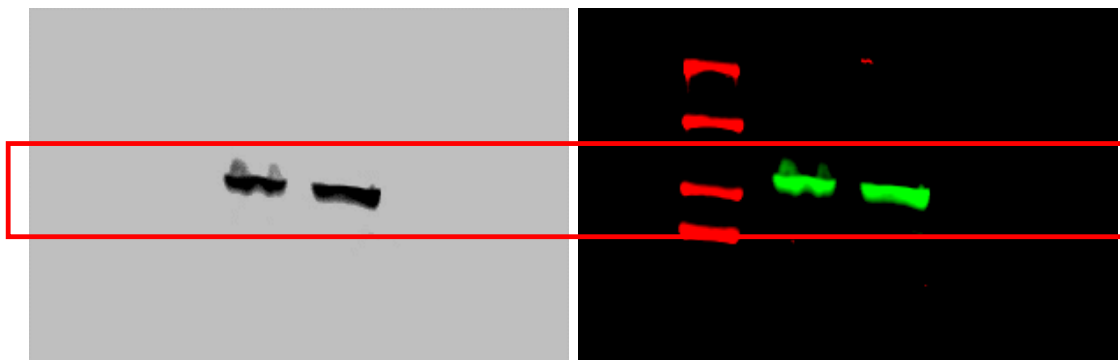

WB: PARP1

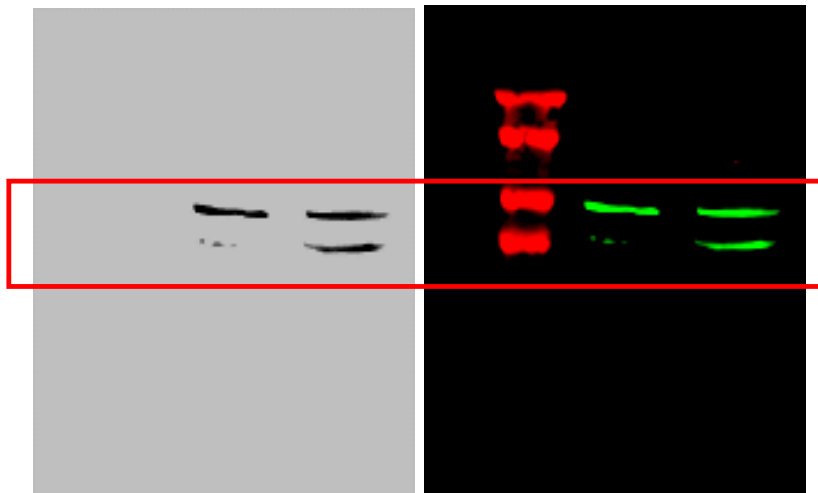

WB: DUOX1

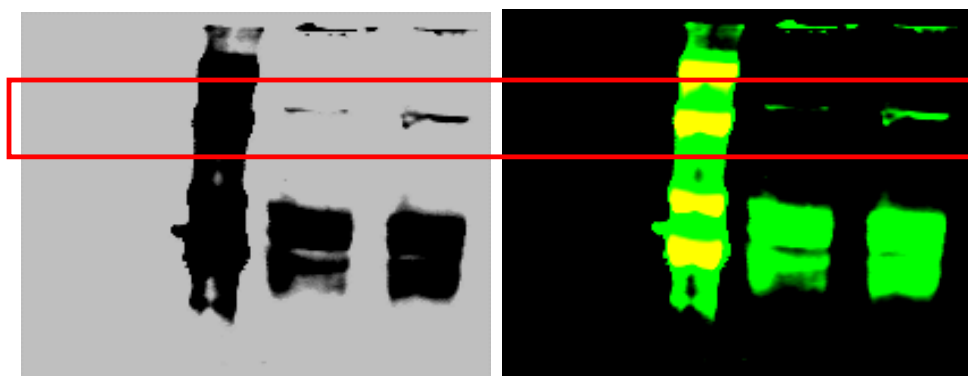

WB: GAPDH

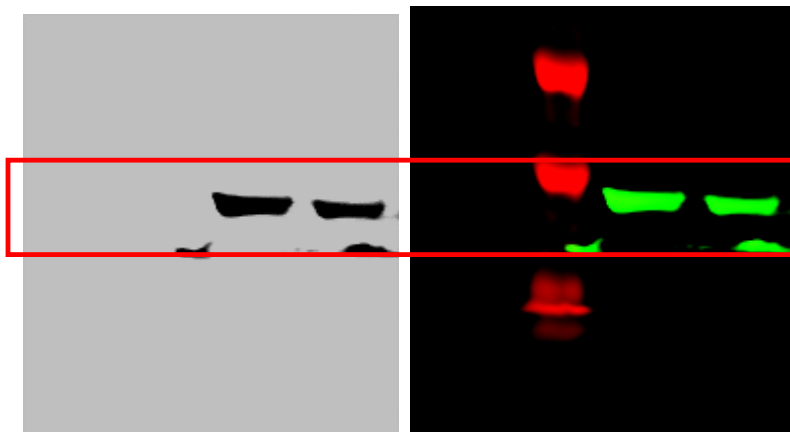

**Figure. 2M**

**WB: DNMT1**

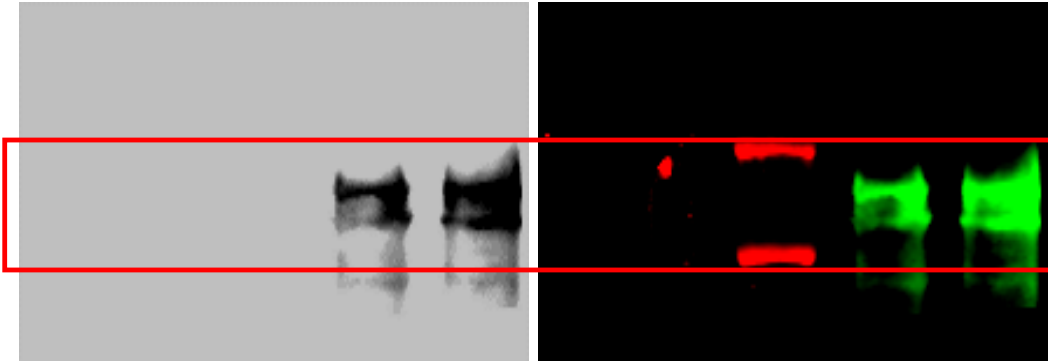

**WB: DNMT3A**

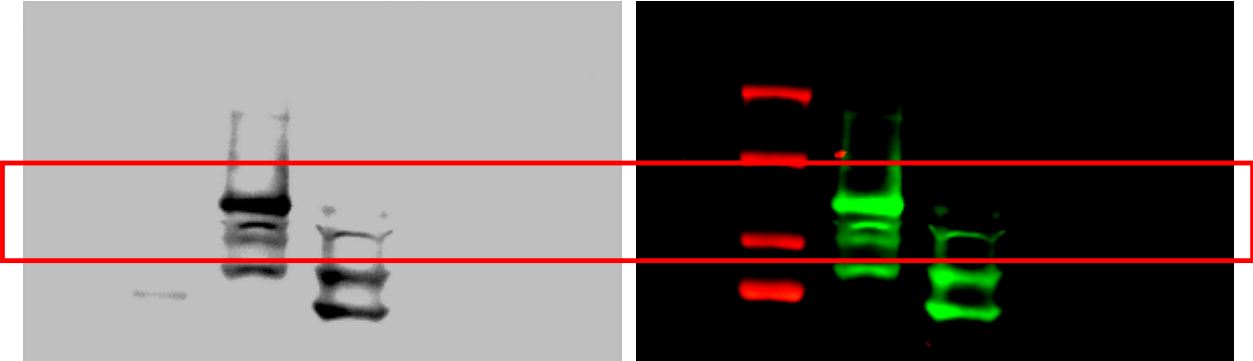

**WB: DNMT3B**

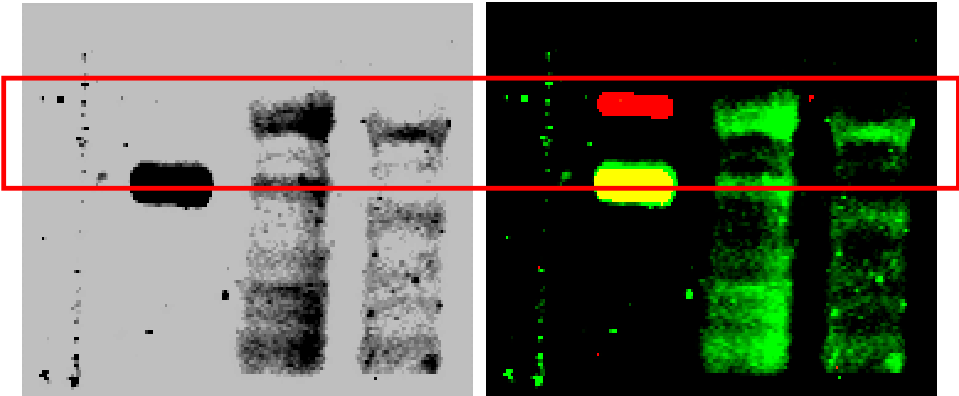

**WB: GAPDH**

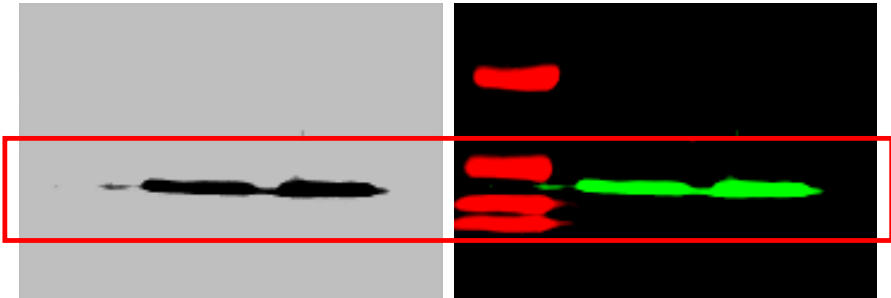

**Figure. 20**

**WB: DNMT1**

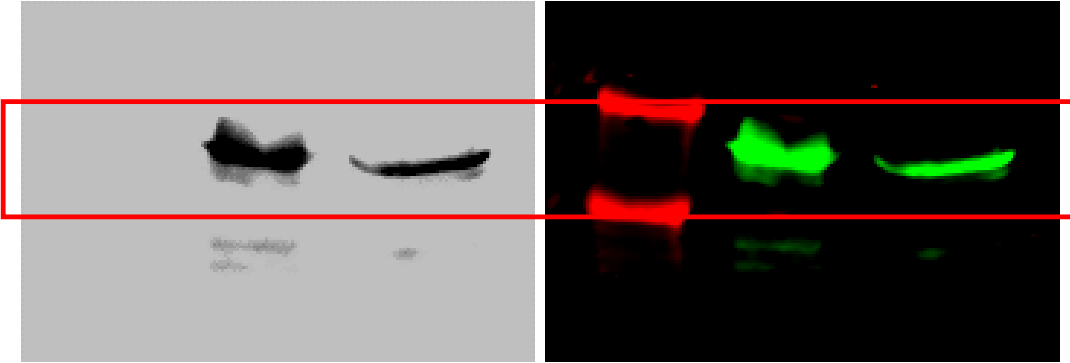

**WB: DNMT3A**

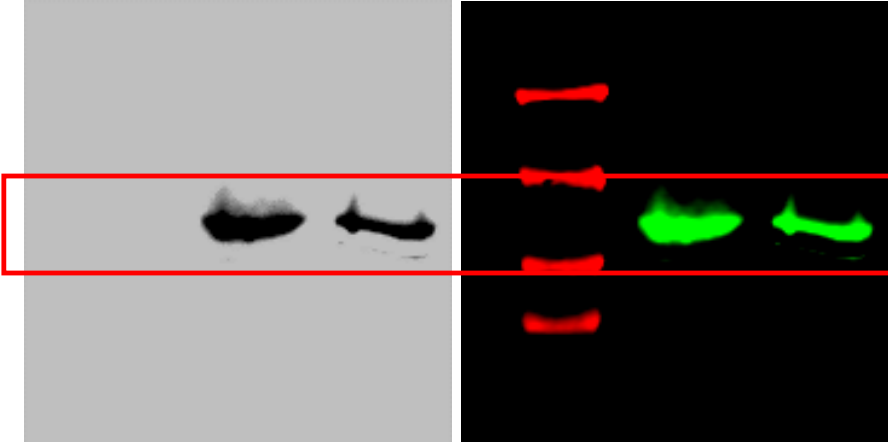

**WB: DNMT3B**

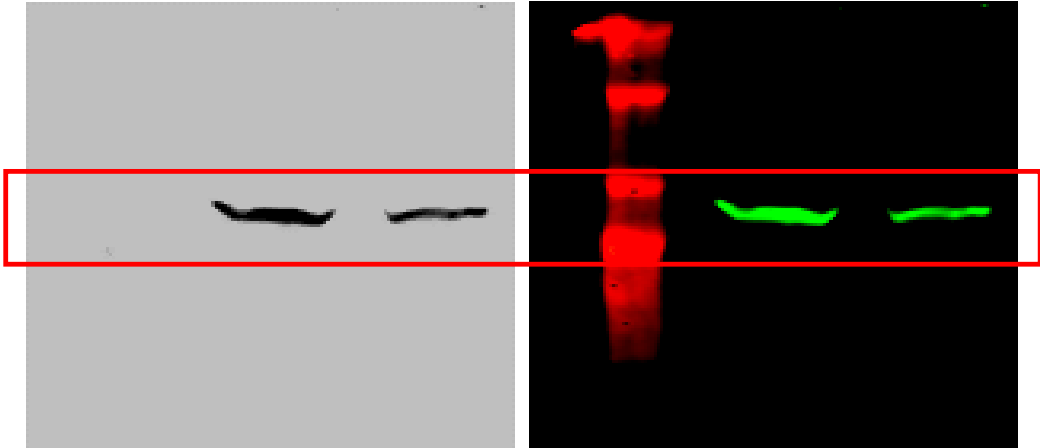

**WB: GAPDH**

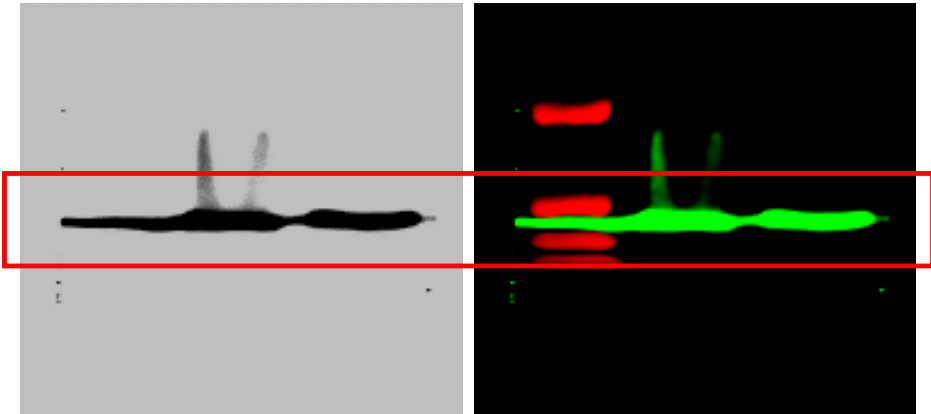

Figure. 2P

WB: DNMT1

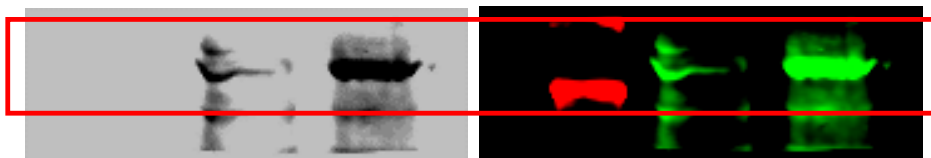

WB: DNMT3A

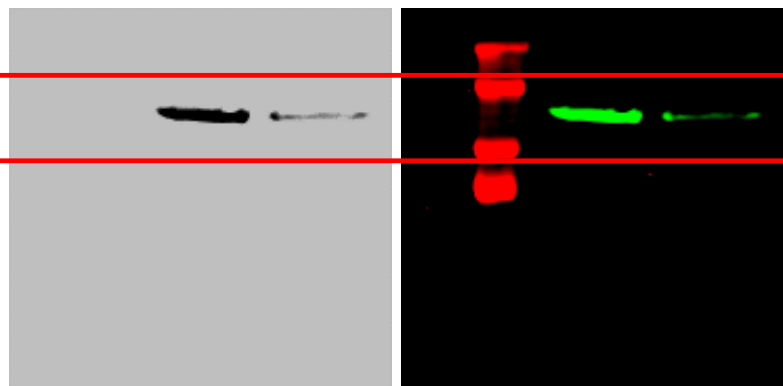

WB: DNMT3B

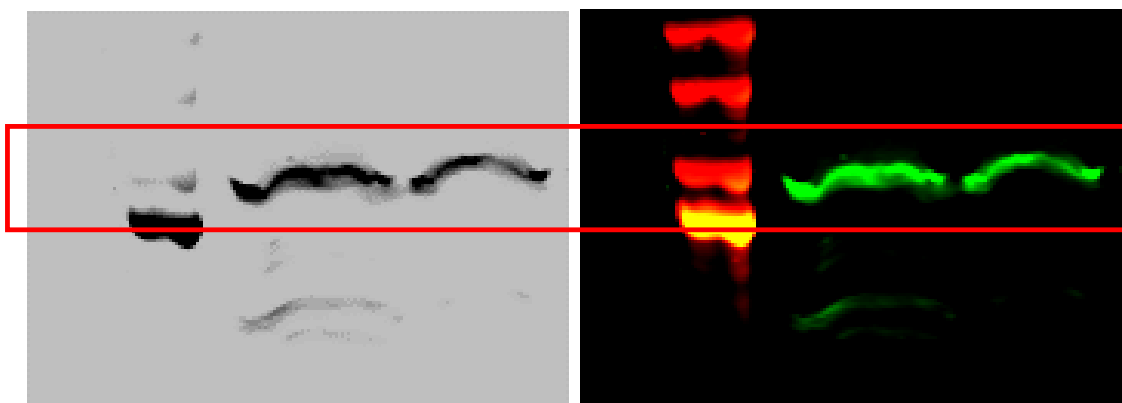

WB: DUOX1

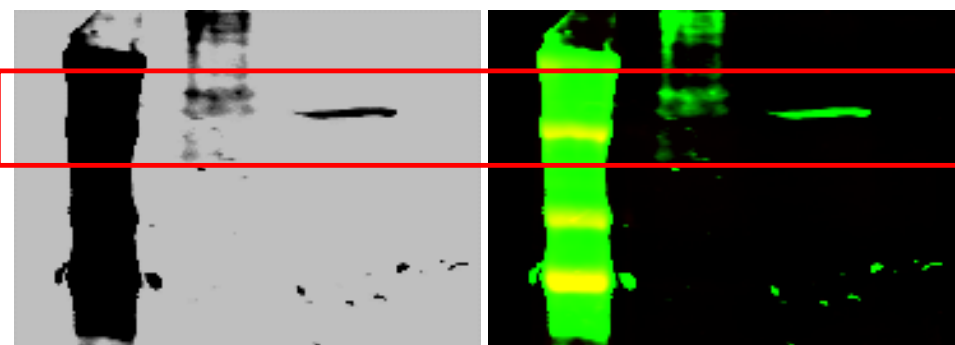

WB: GAPDH

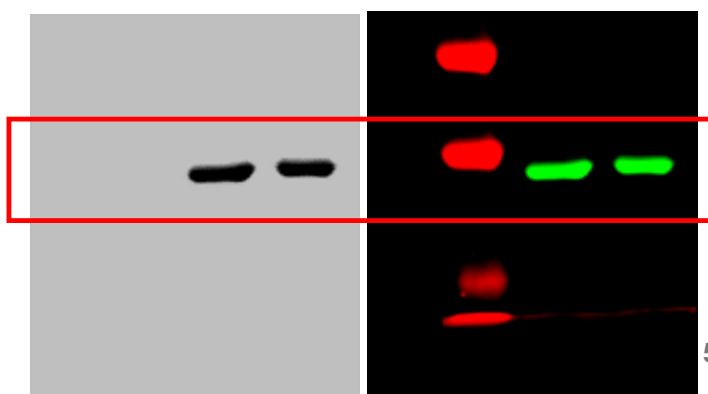

Figure. 2Q

WB: DNMT1

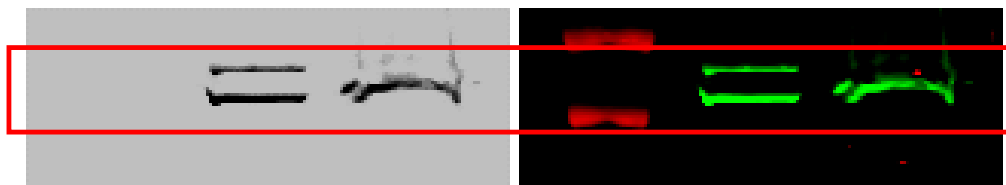

WB: DNMT3A

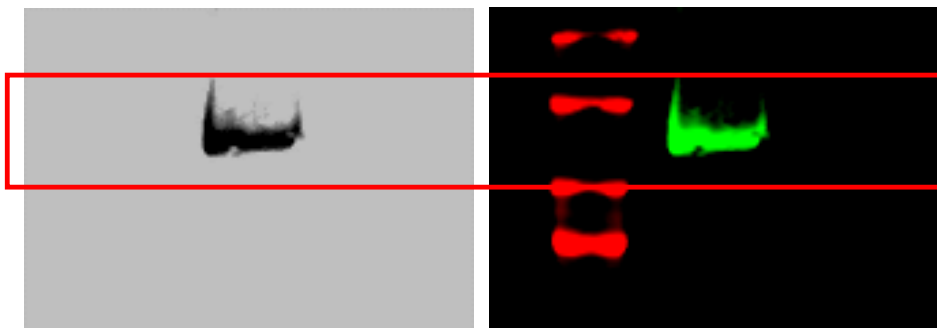

WB: DNMT3B

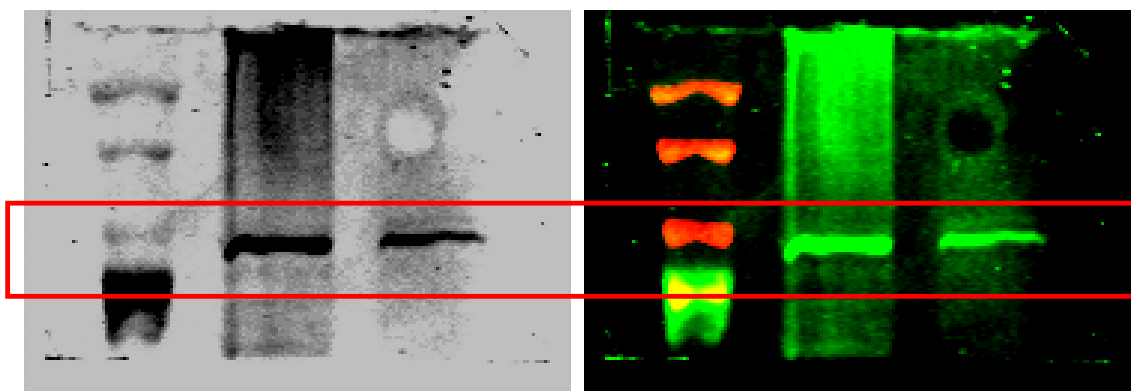

WB: DUOX1

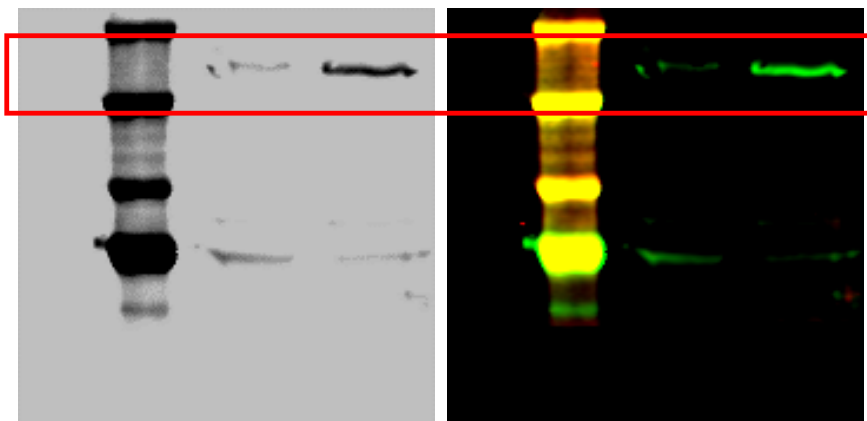

WB: GAPDH

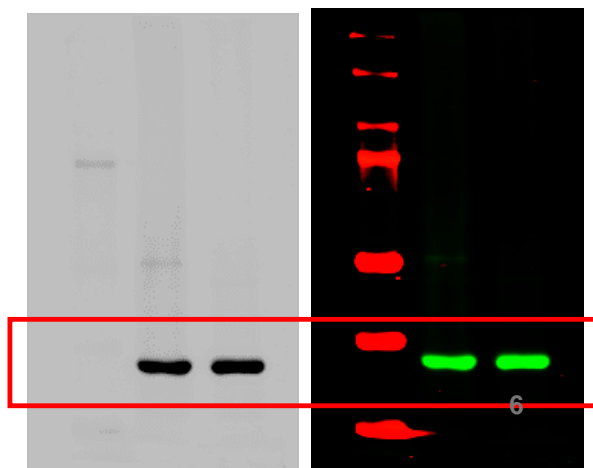

Figure. 3C

WB: AR

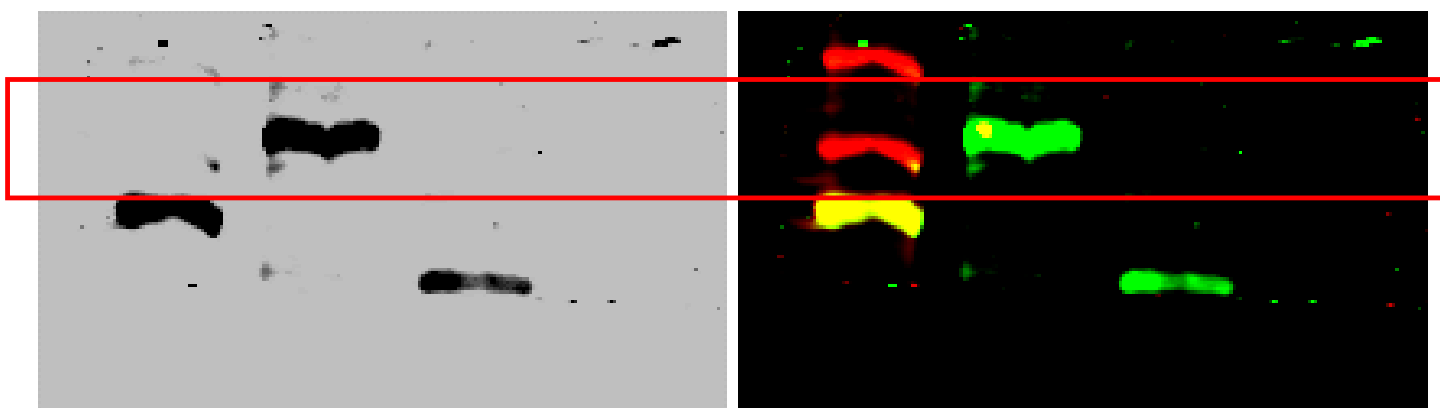

WB: DUOX1

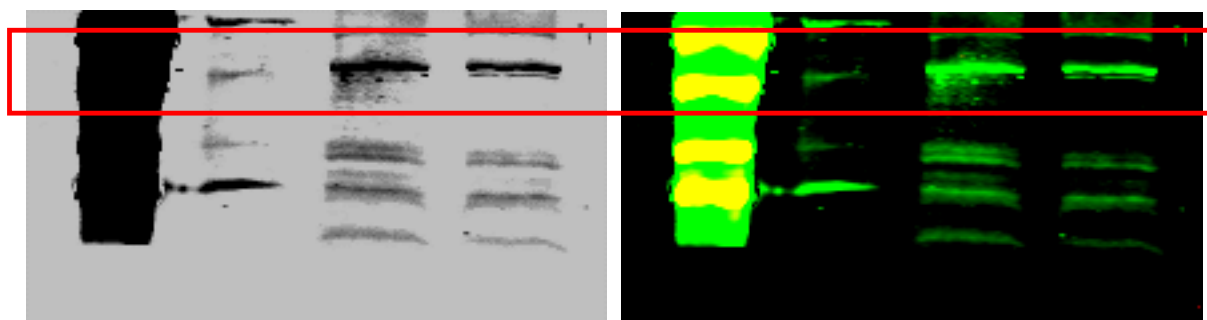

WB: GAPDH

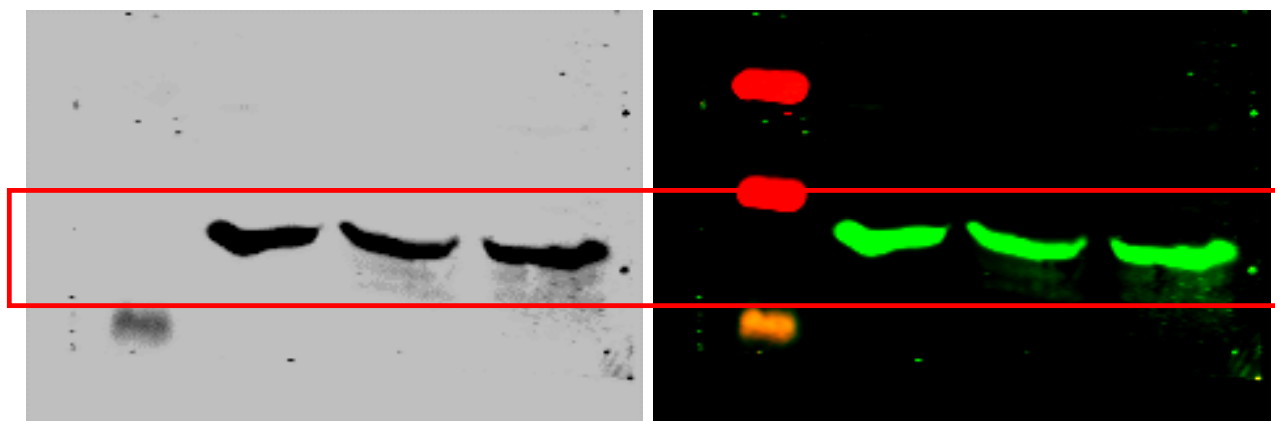

Figure. 3D

WB: GFP-AR

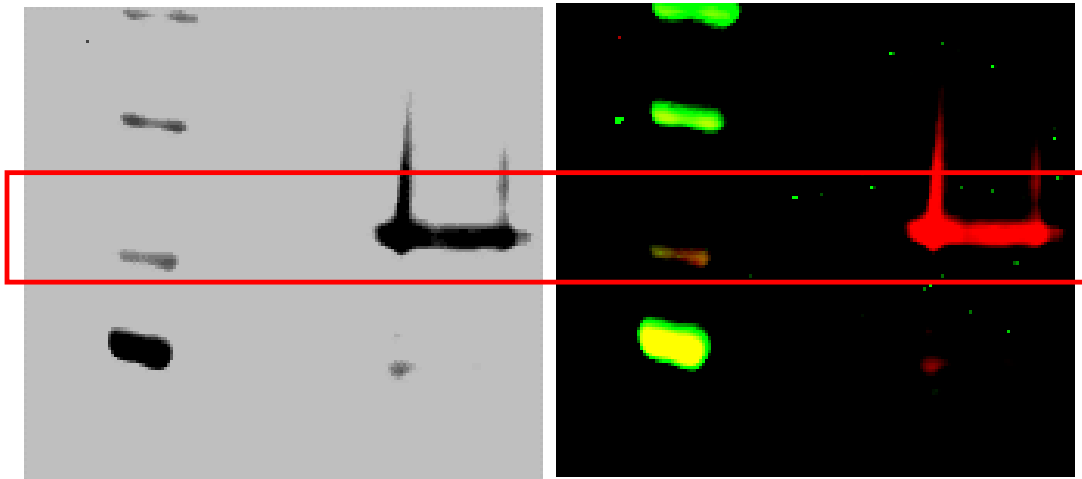

WB: GFP

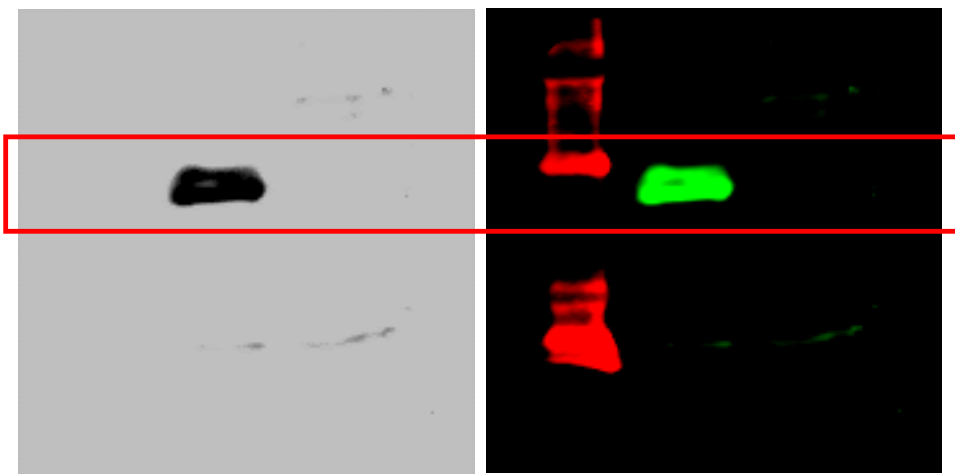

WB: DUOX1

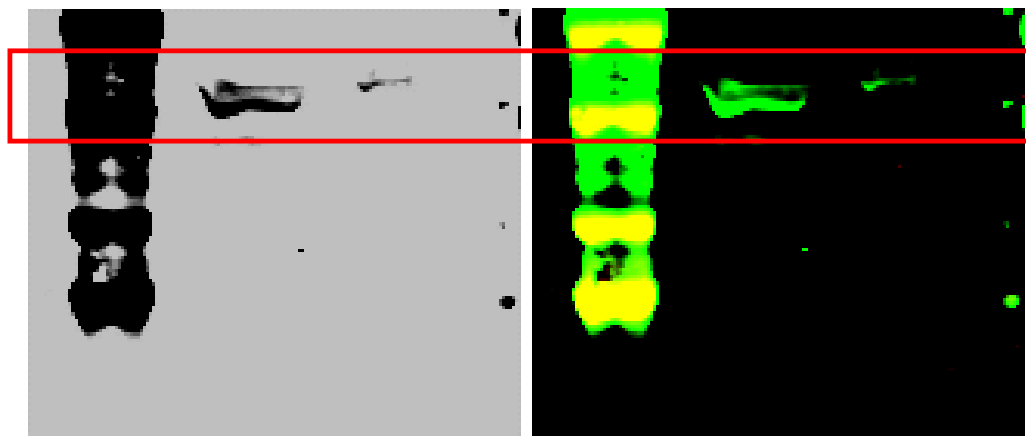

WB: GAPDH

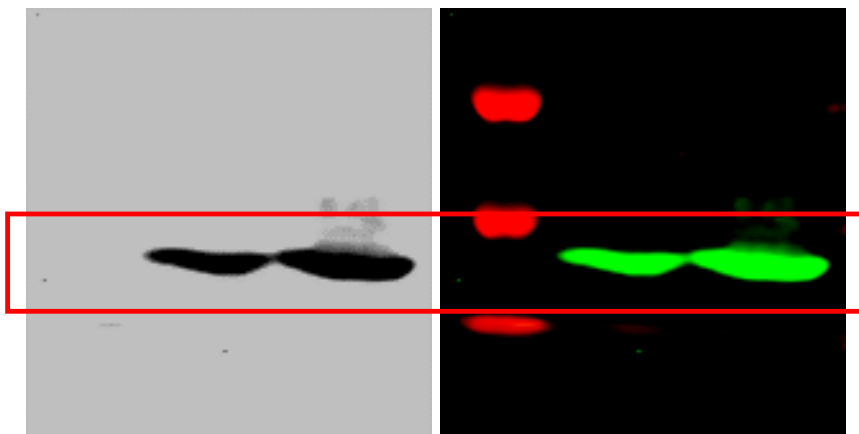

**Figure. 3H**

**WB: AR**

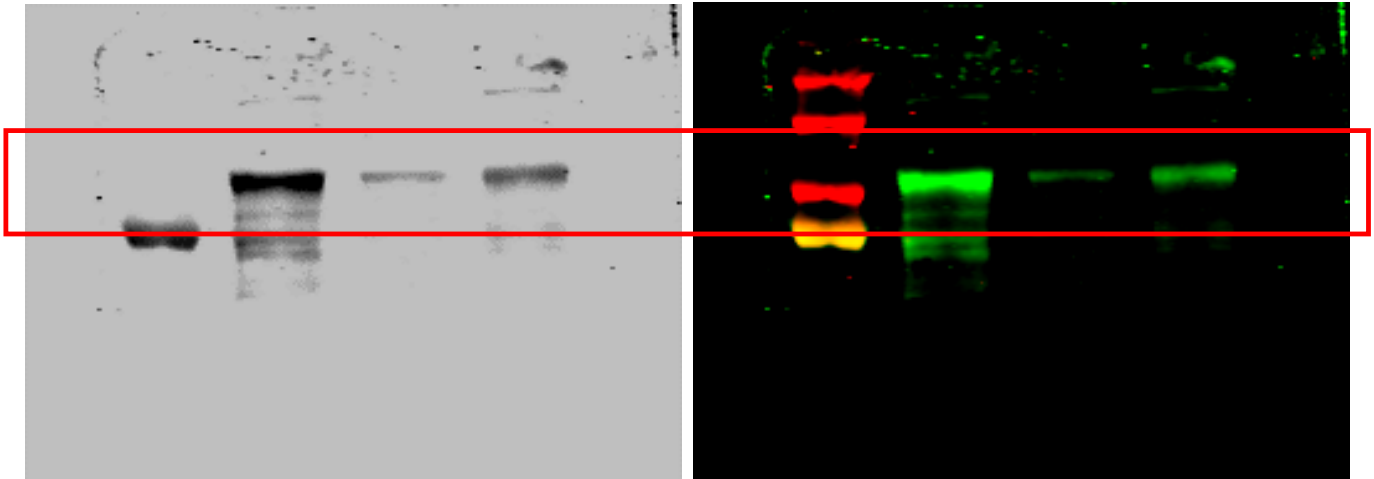

**WB: DUOX1**

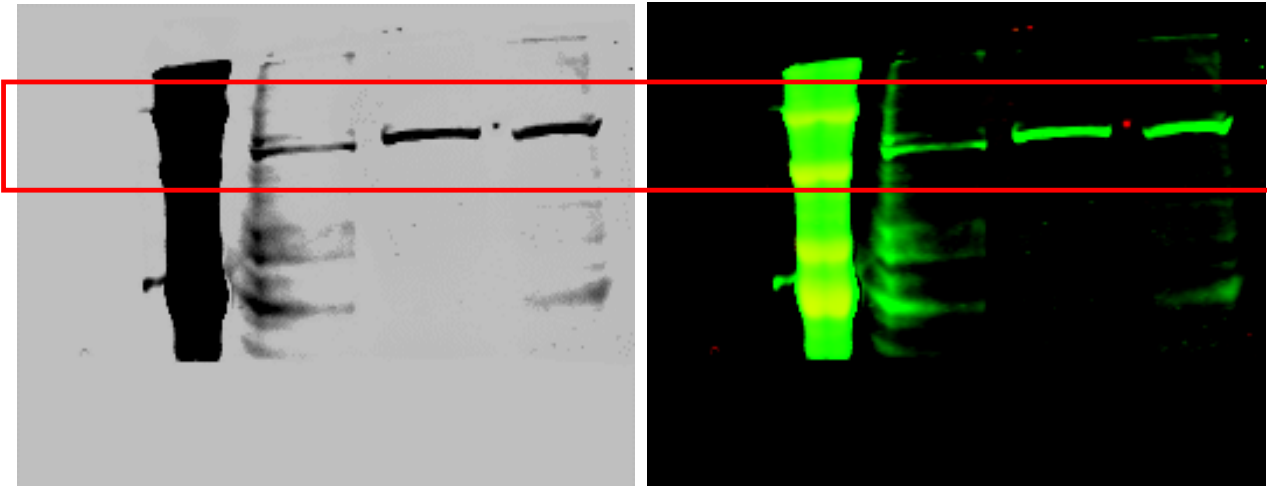

**WB: GAPDH**

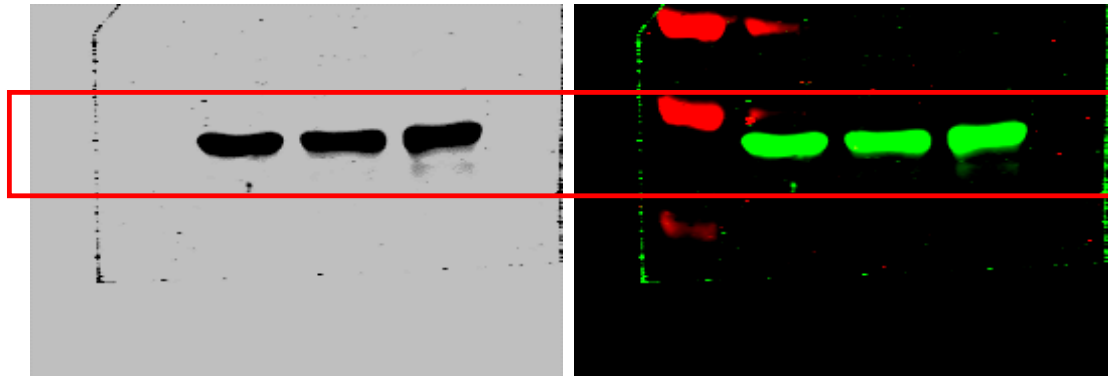

Figure. 4I

WB: Flag-AR (WT)

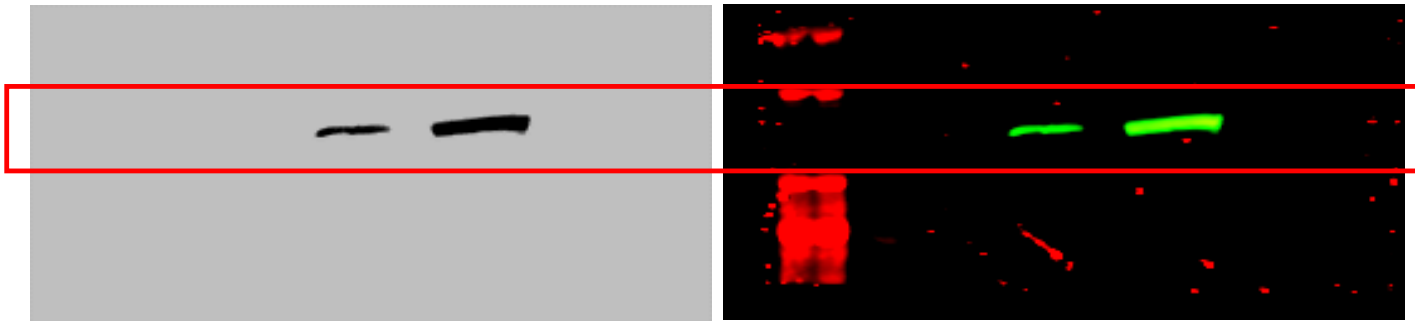

WB: Flag-AR (Mut)

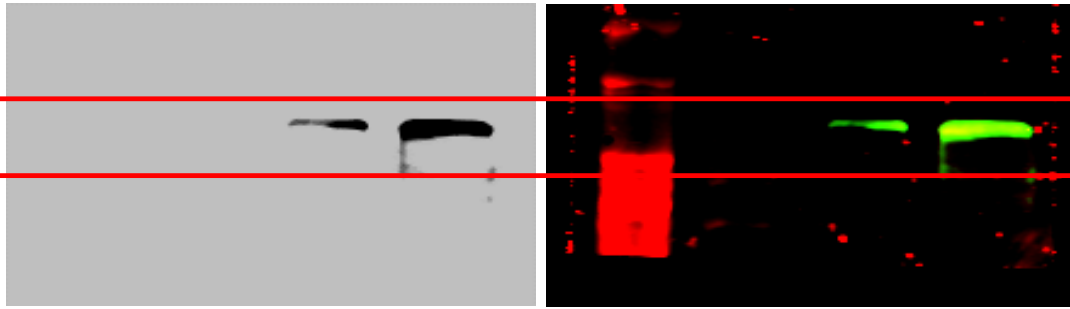

WB: Flag-AR (NB)

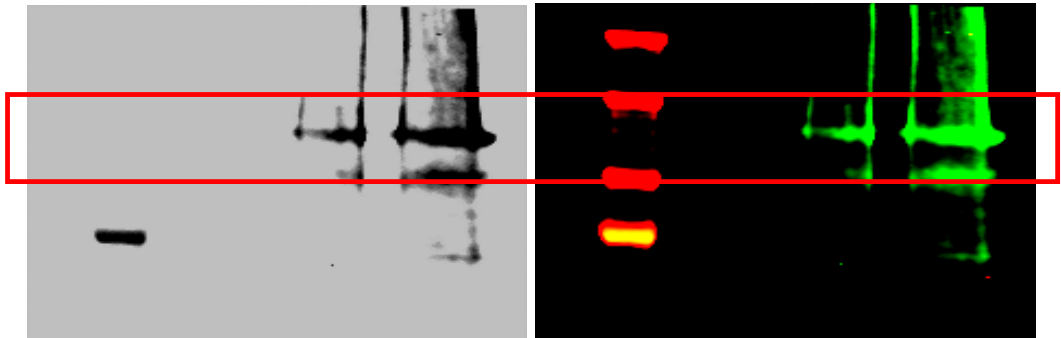

WB: GAPDH (WT)

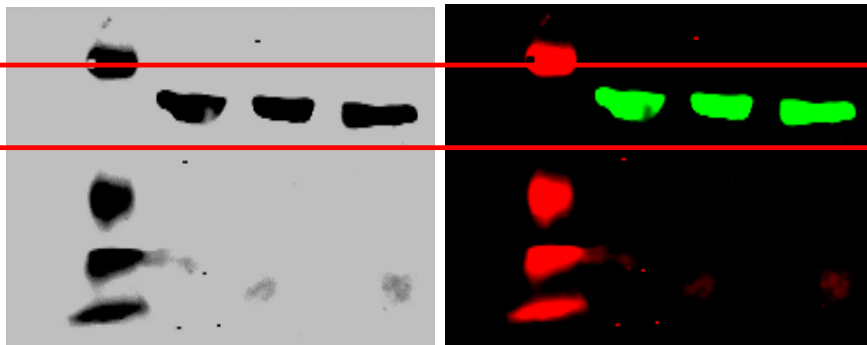

WB: GAPDH (Mut)

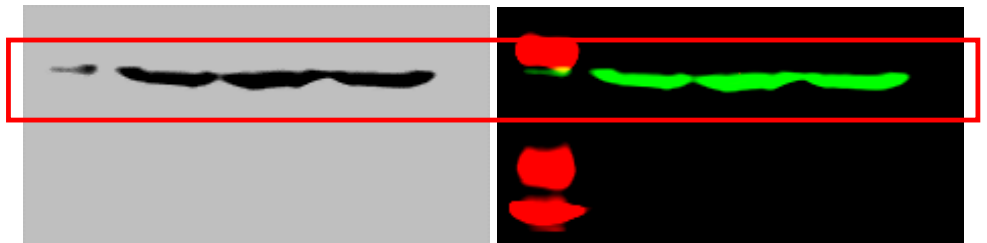

WB: GAPDH (NB)

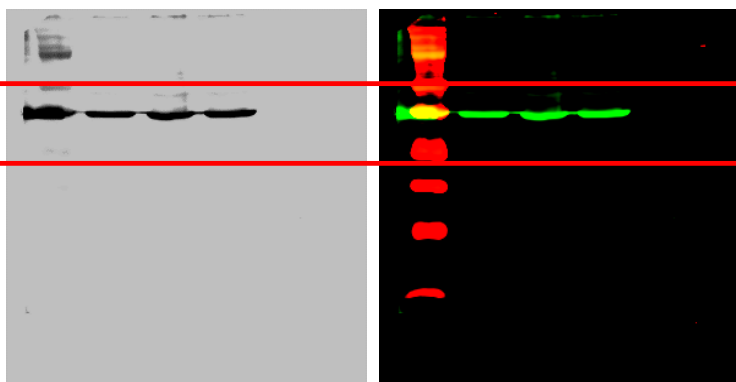

Figure. 4K

WB: Flag-AR

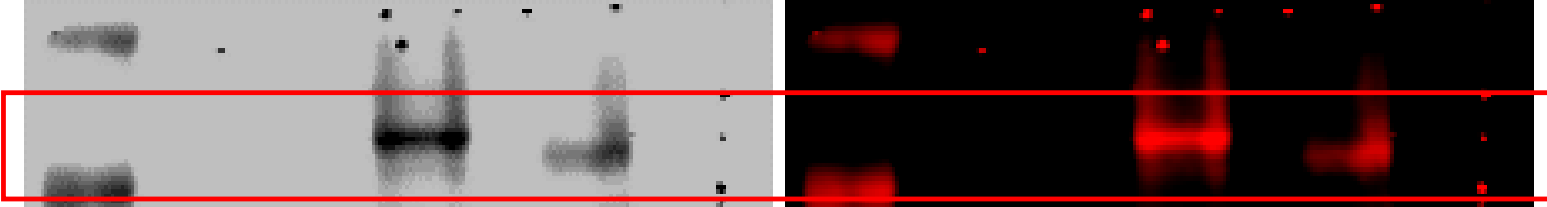

WB: ACTB

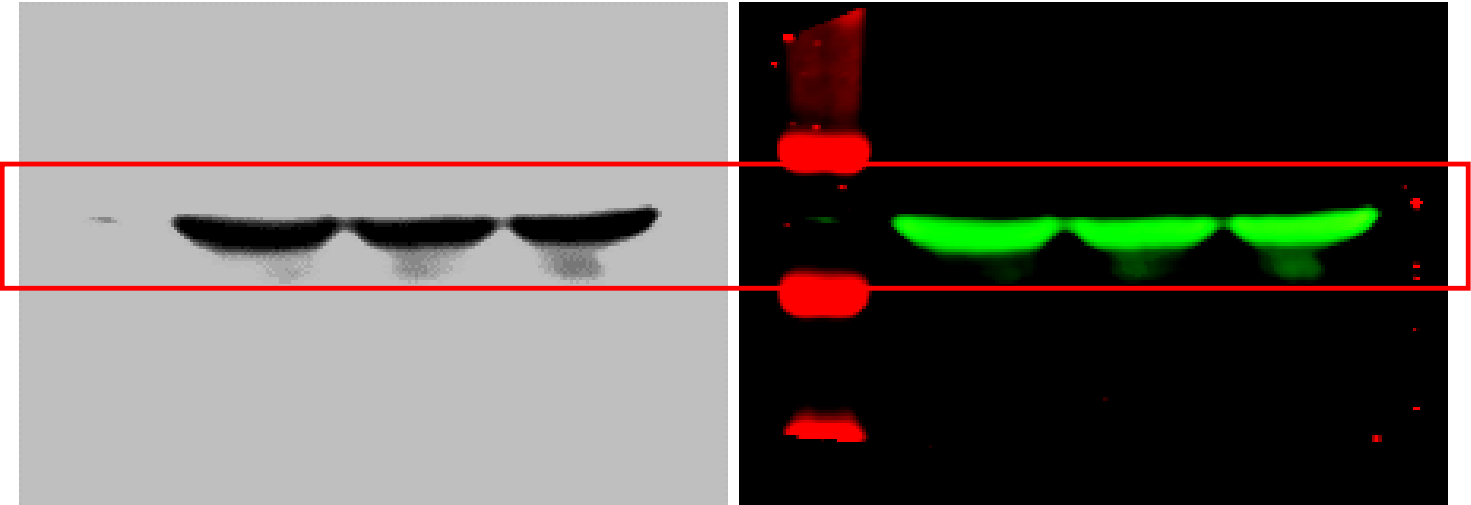

Figure. 5D

WB: BRD4

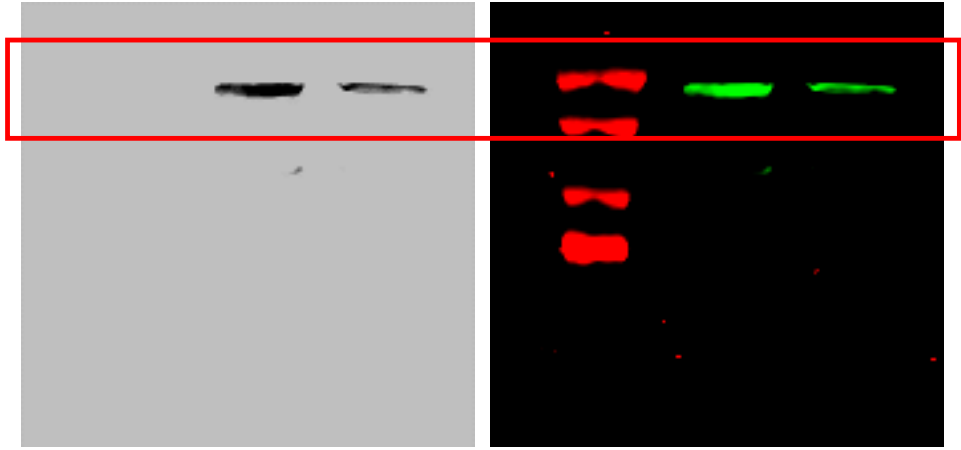

WB: DUOX1

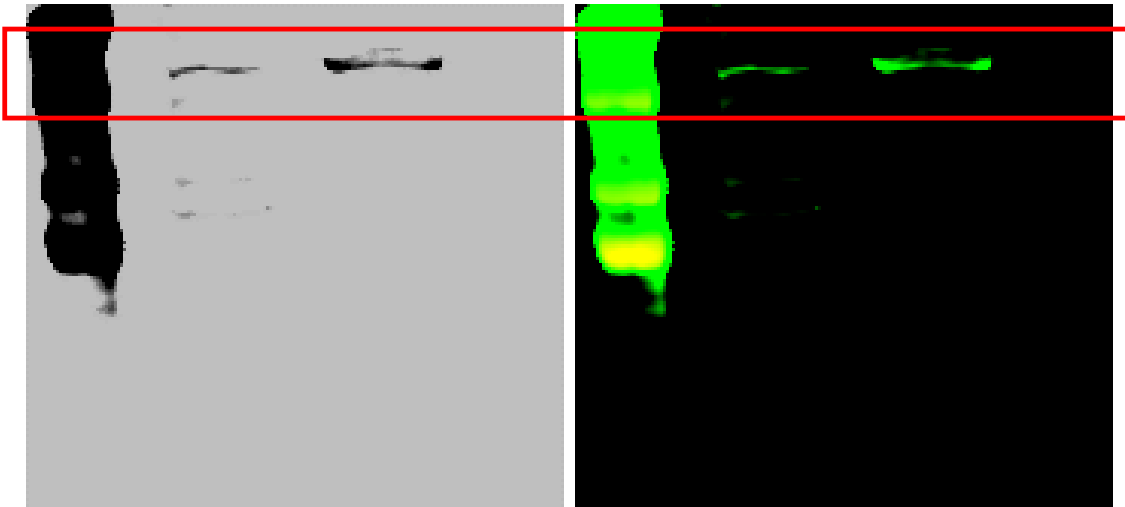

WB: MYC

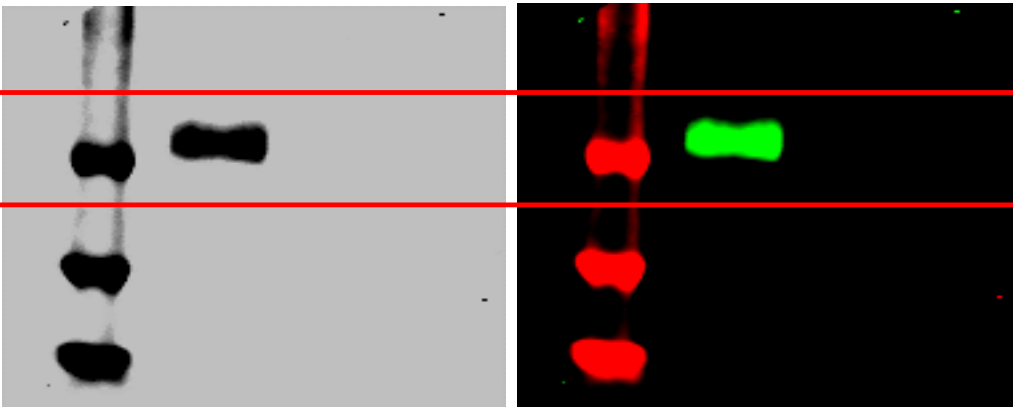

WB: GAPDH

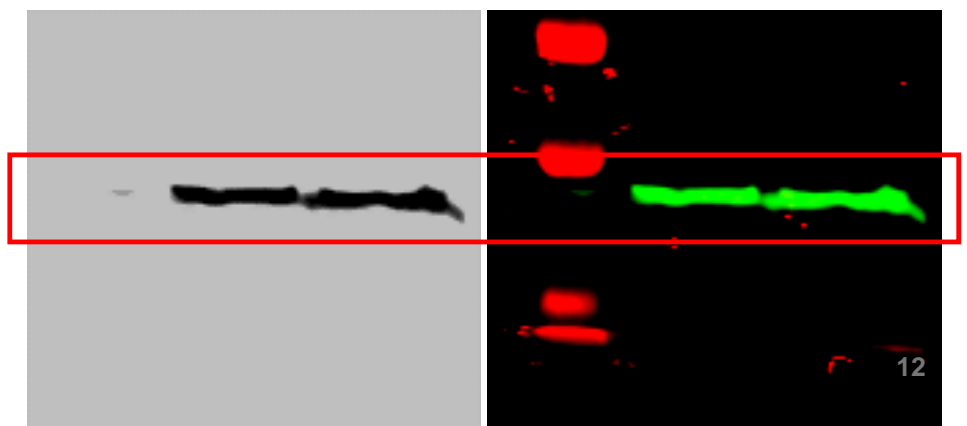

Figure. 5H

WB: BRD4

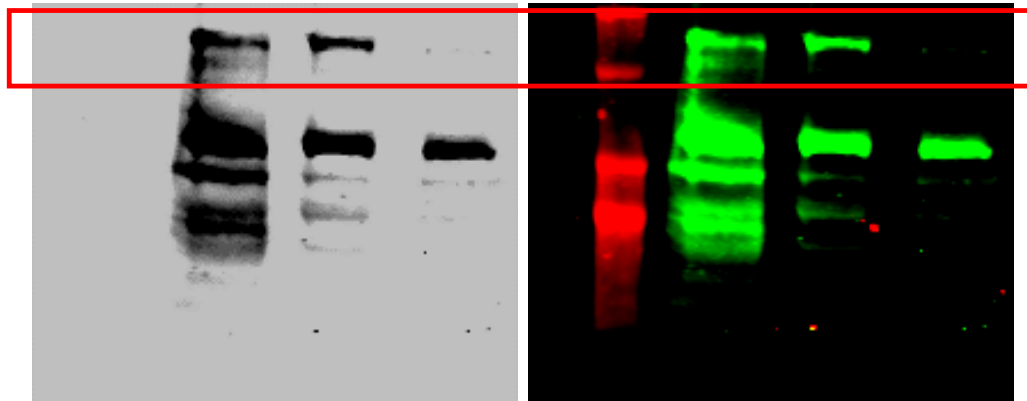

WB: DUOX1

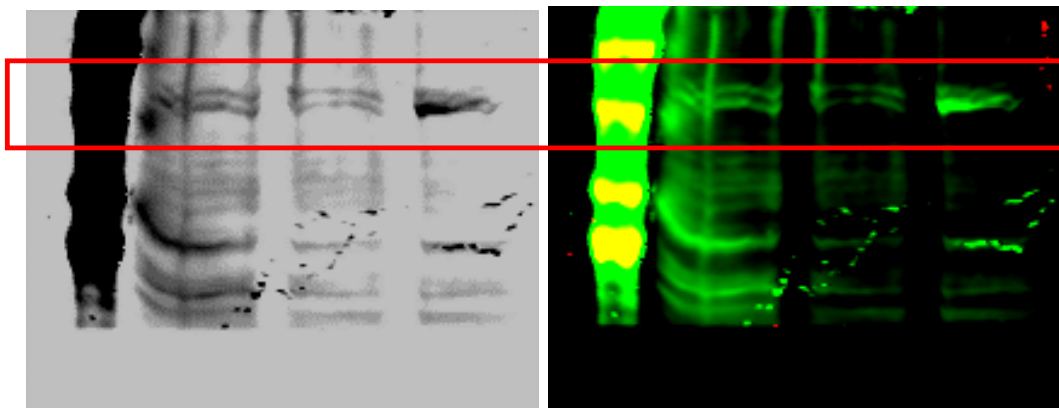

WB: MYC

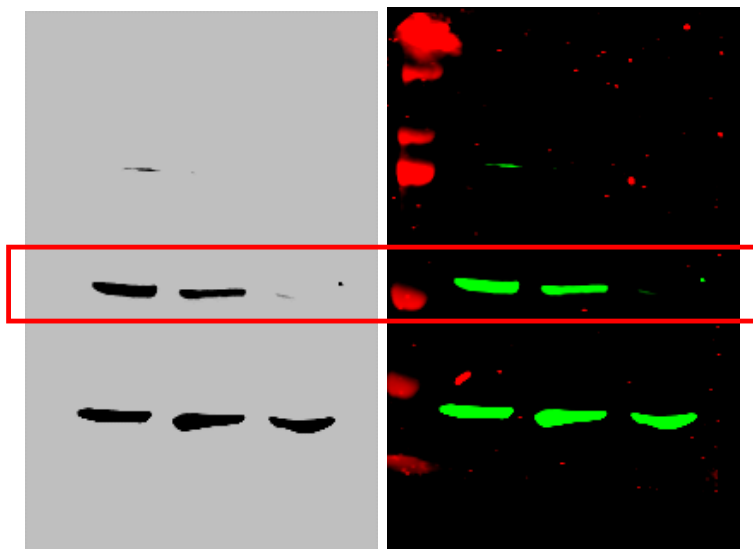

WB: GAPDH

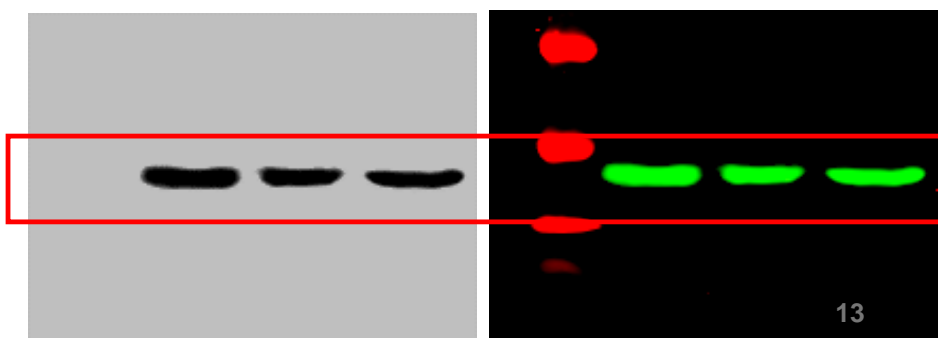

Figure. 5J

WB: AR

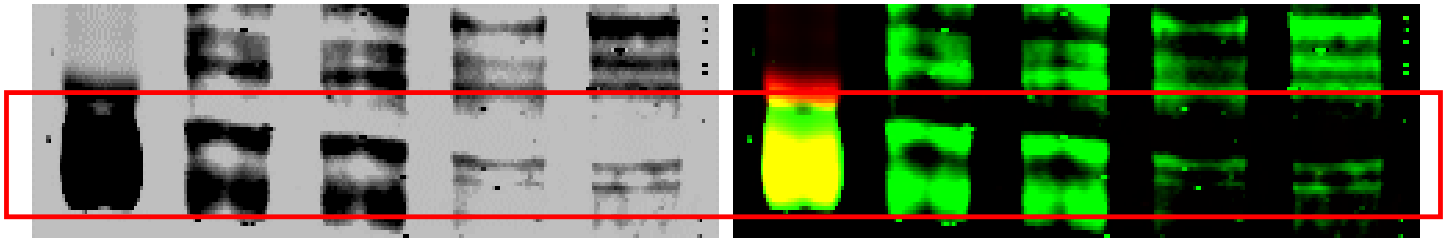

WB: DUOX1

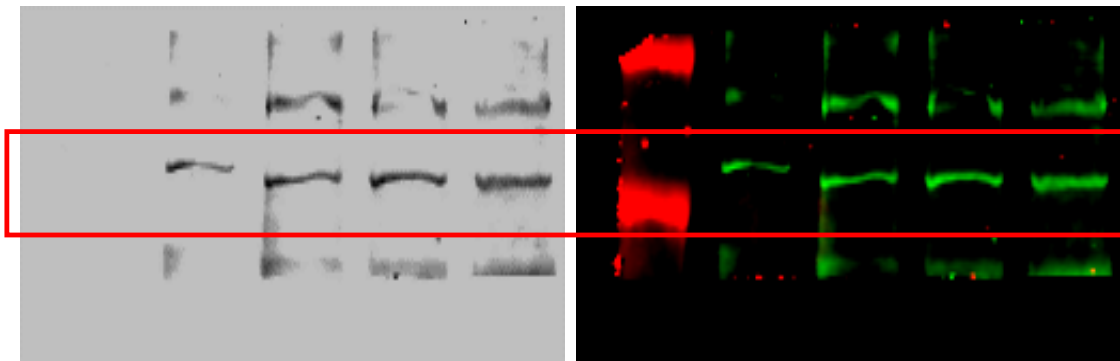

WB: cPARP1

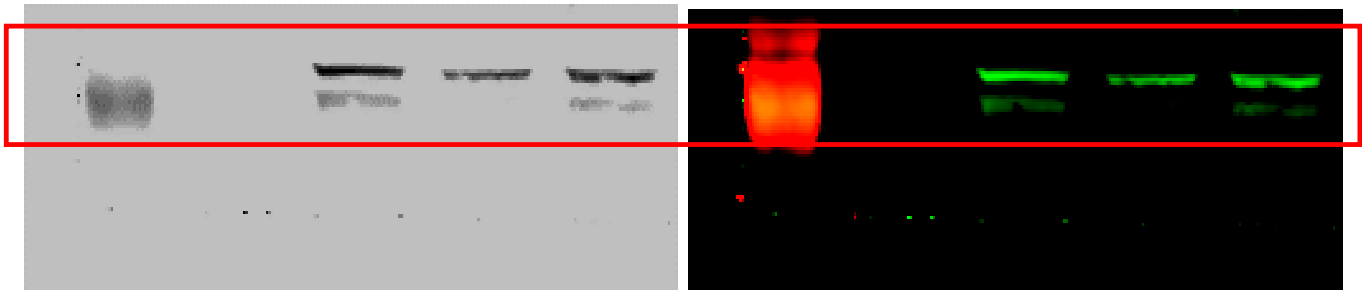

WB: GAPDH

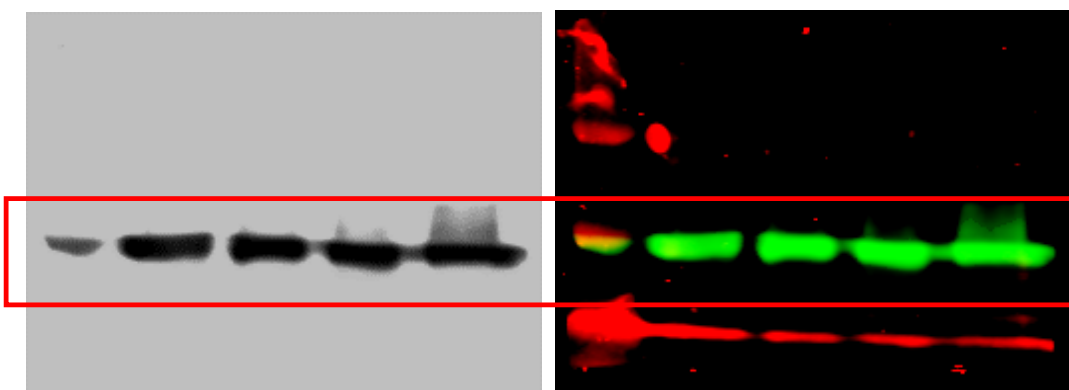

Figure. 6B

WB: DUOX1

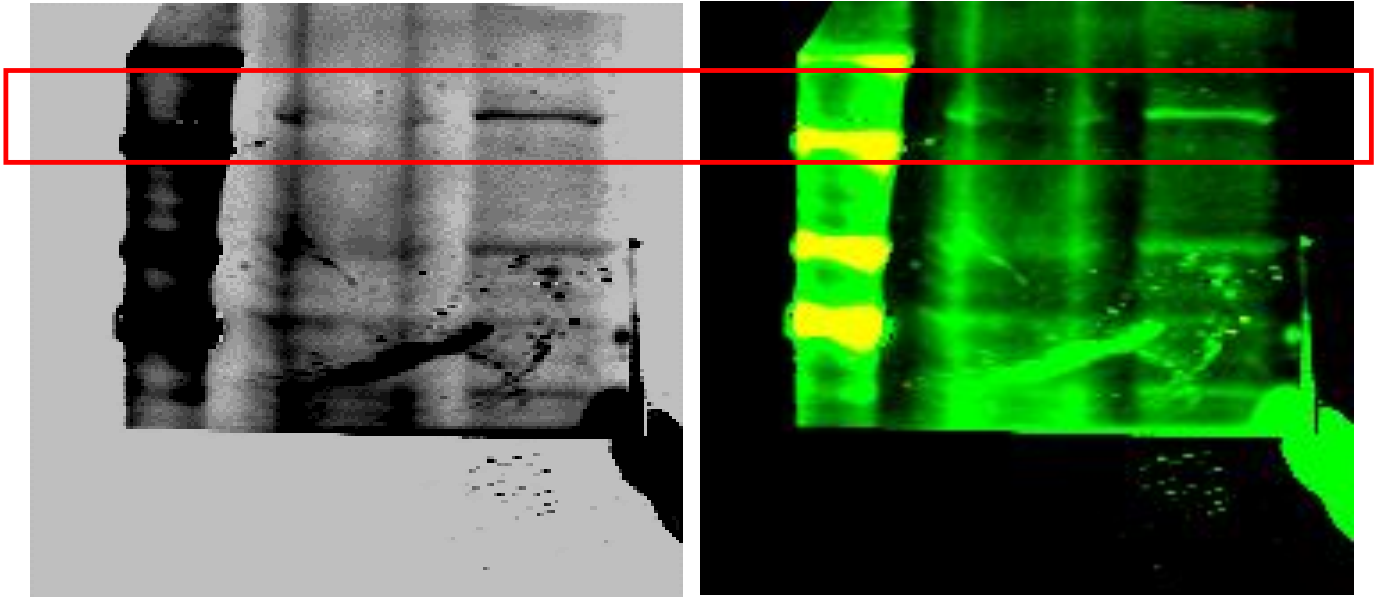

WB: GAPDH

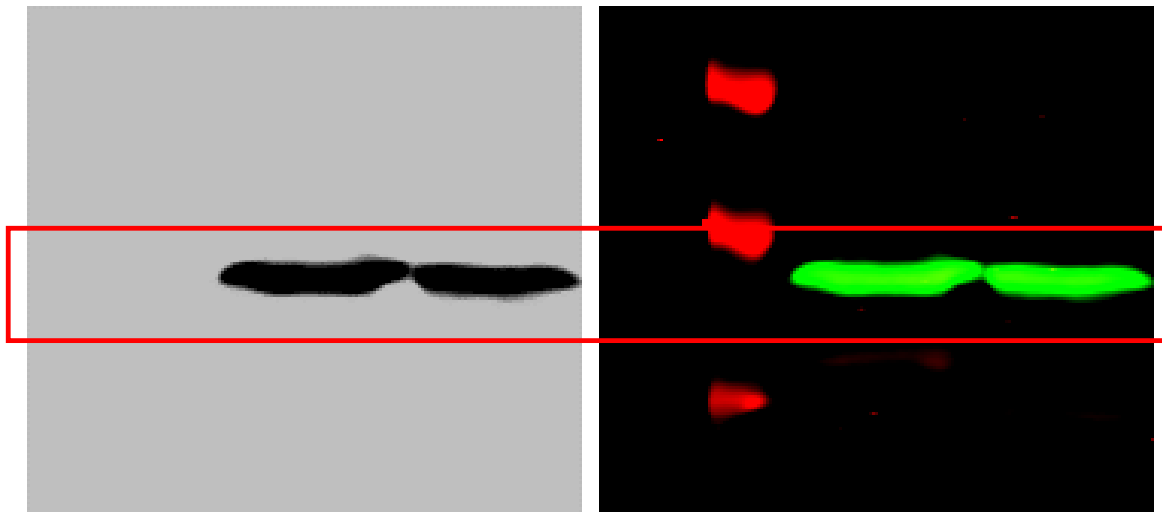

Figure. 6l

WB: Casp9

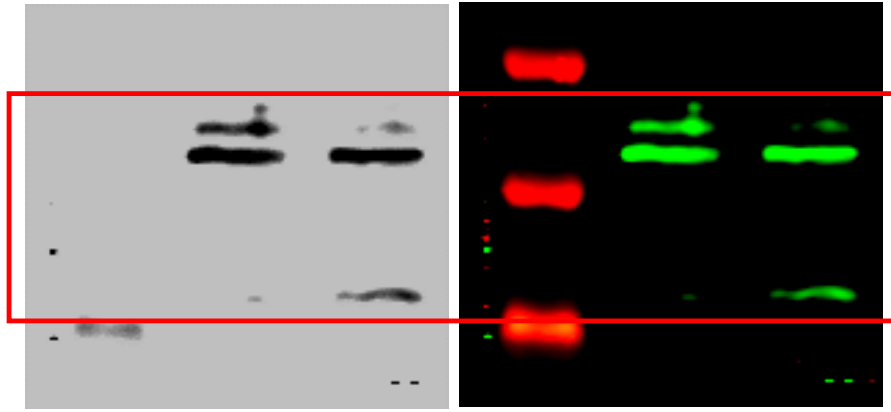

WB: Casp3

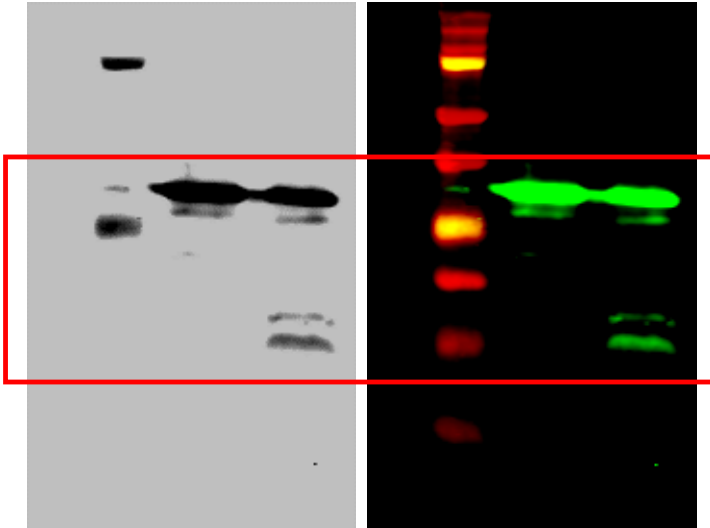

WB: cPARP1

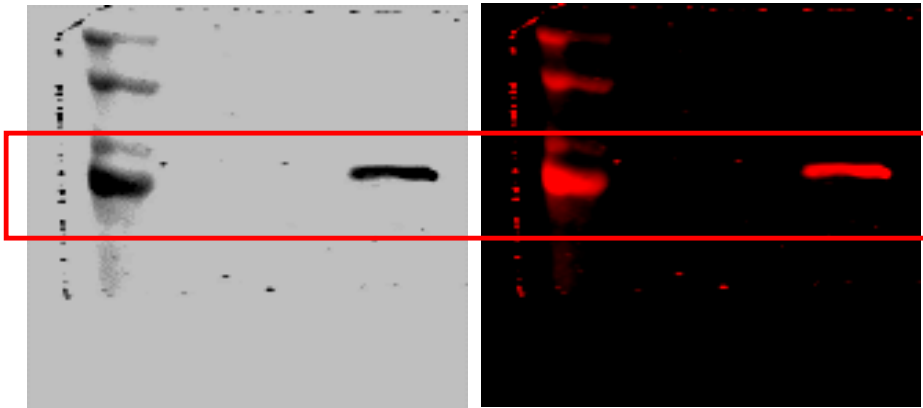

WB: GAPDH

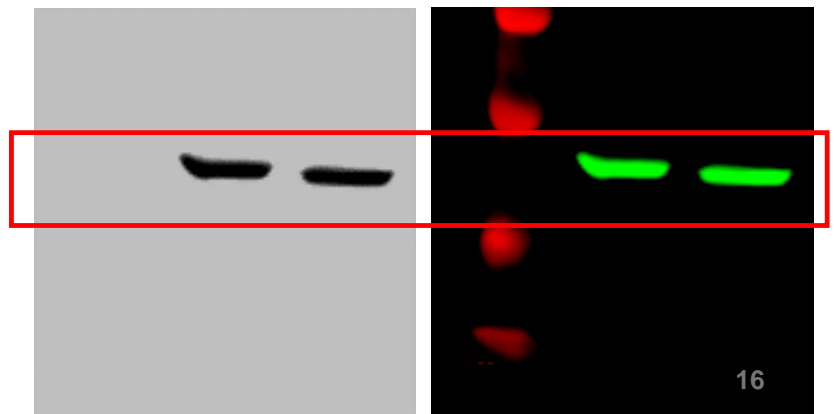

Figure. 6M

WB: DSP

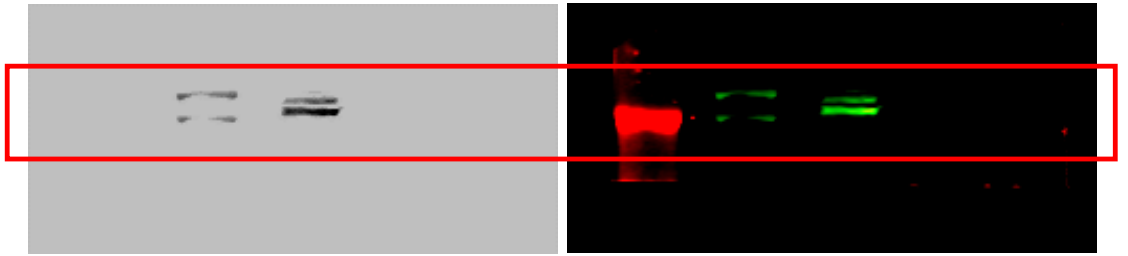

WB:  $\beta$ -Catenin

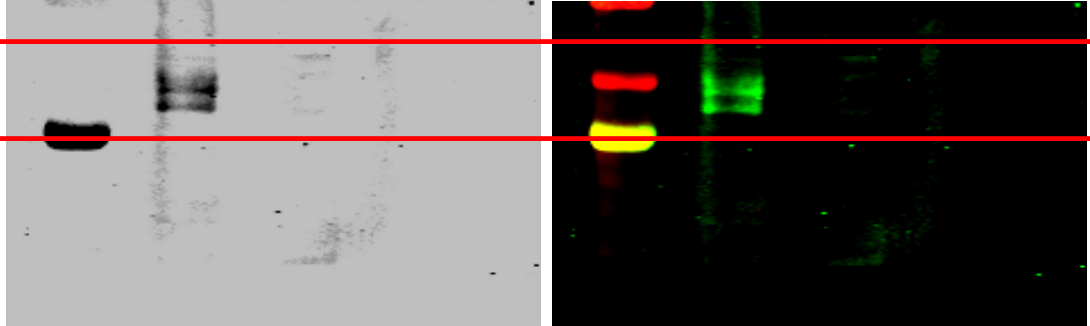

WB: Snail1

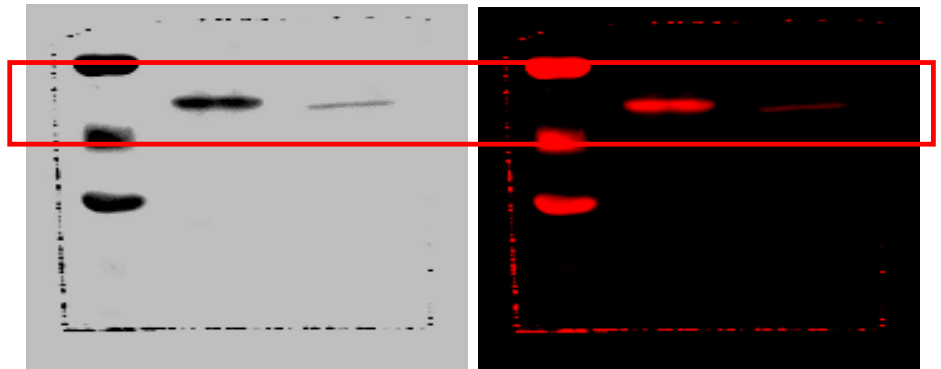

WB: Vimentin

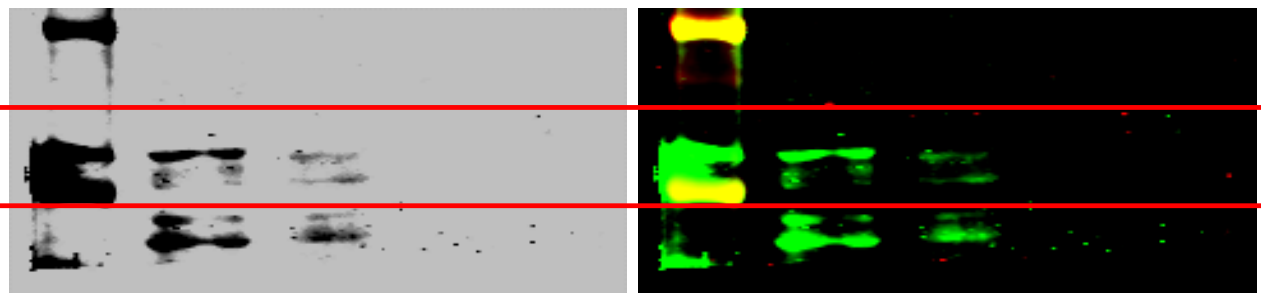

WB: GAPDH

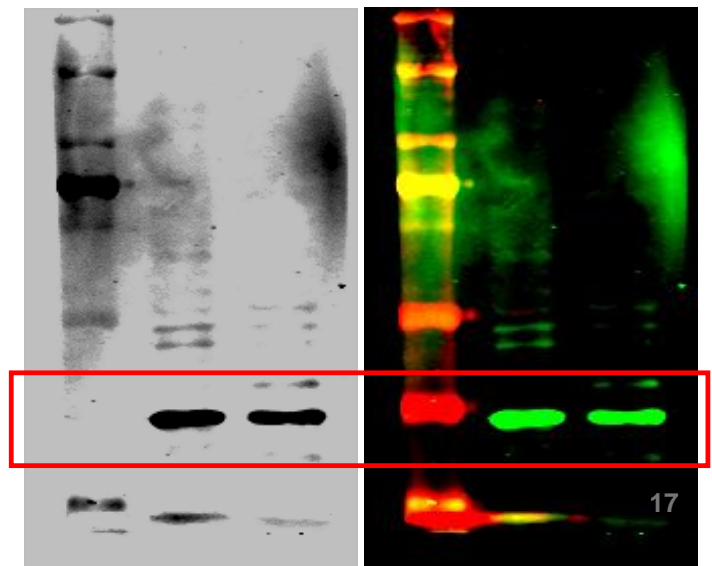

Figure. 6Q

WB: AR

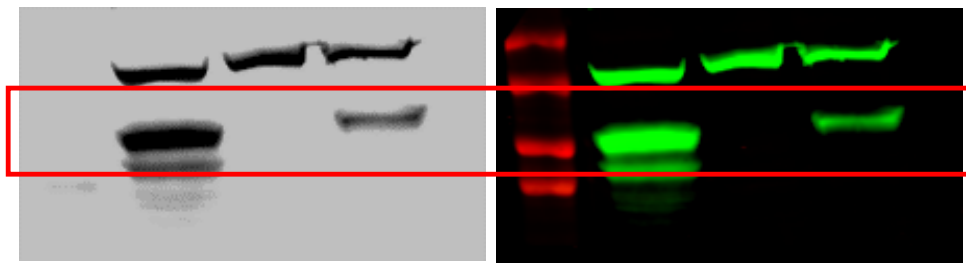

WB: Casp3 (Low Exposure)

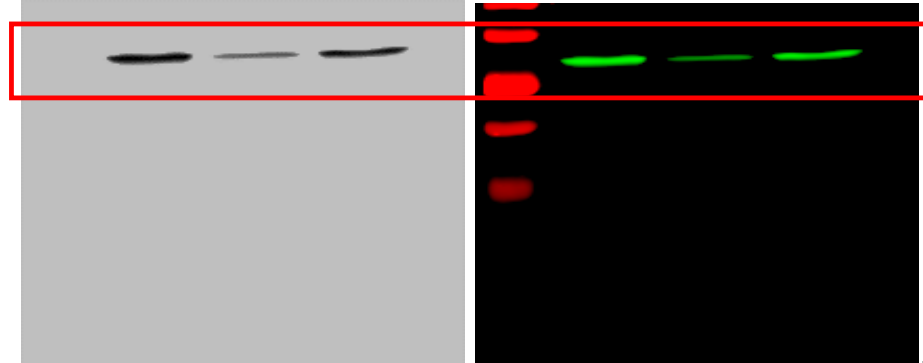

WB: SOD2

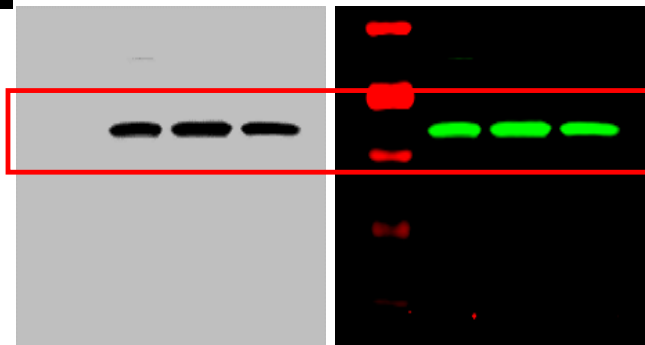

WB: Casp3 (High Exposure)

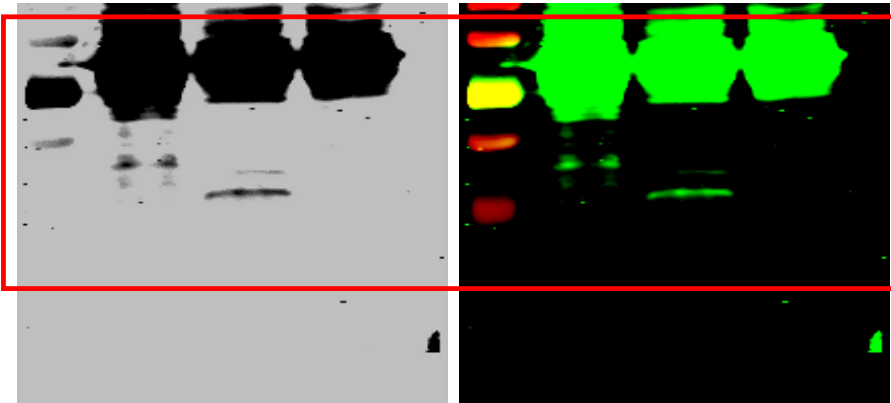

WB: GAPDH

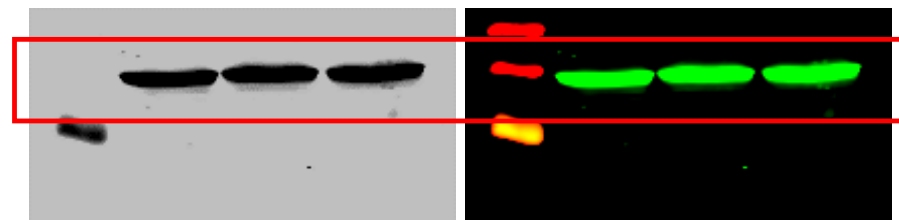

WB: PARP1

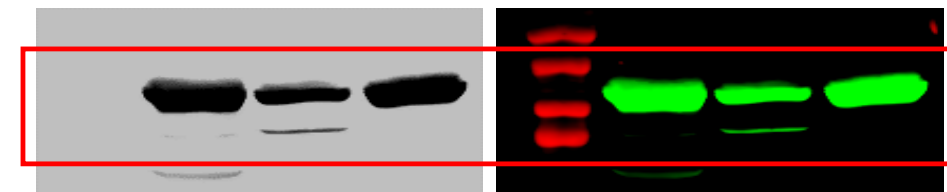

WB: GPX4

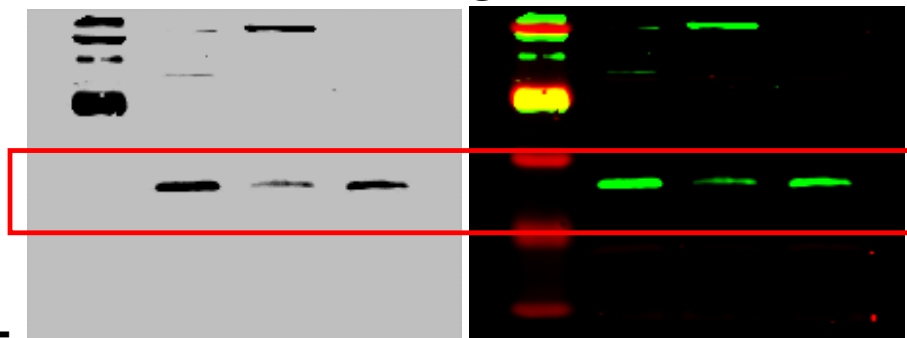

WB: CAT

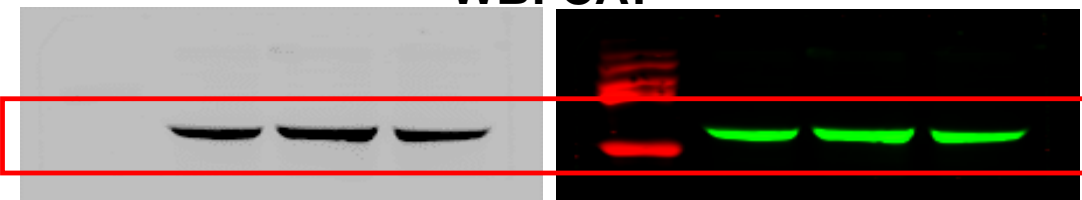

Figure. S5A

WB: Flag-DNMT3A

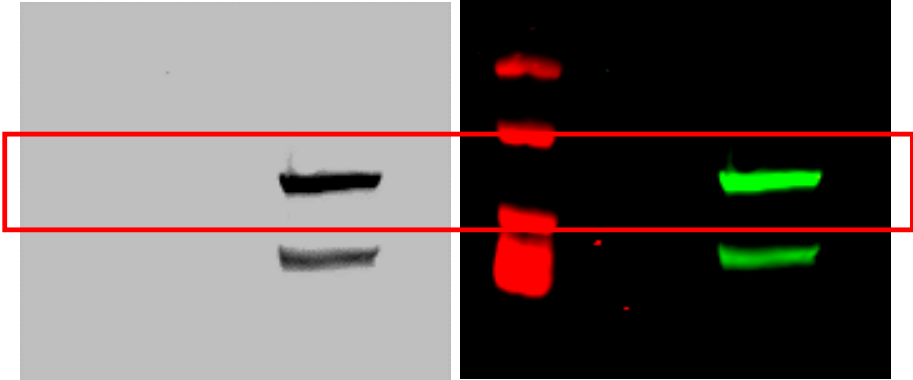

WB: DNMT1

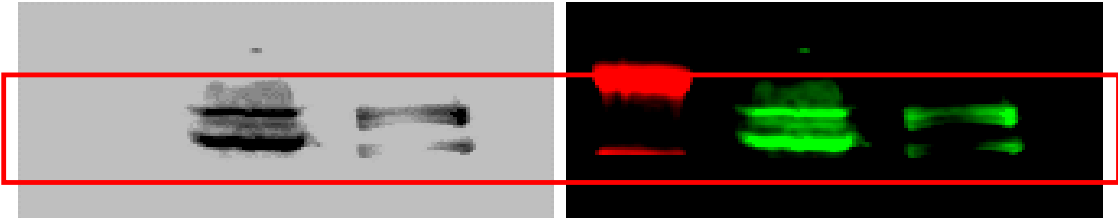

WB: DNMT3B

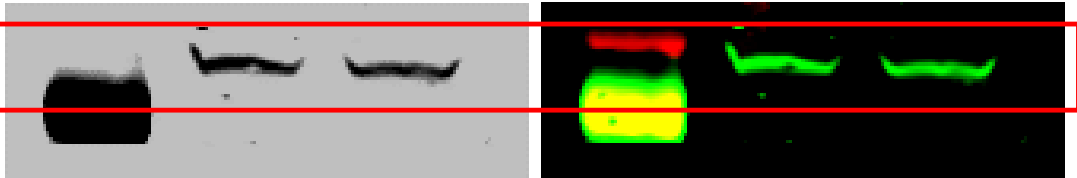

WB: DUOX1

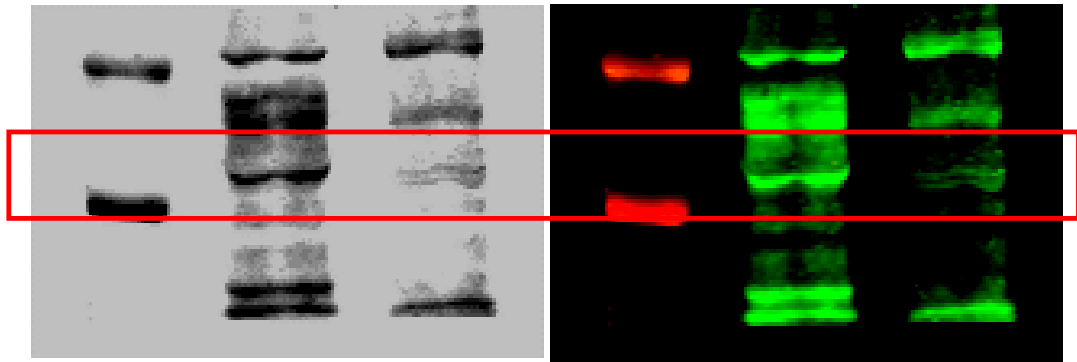

WB: ACTB

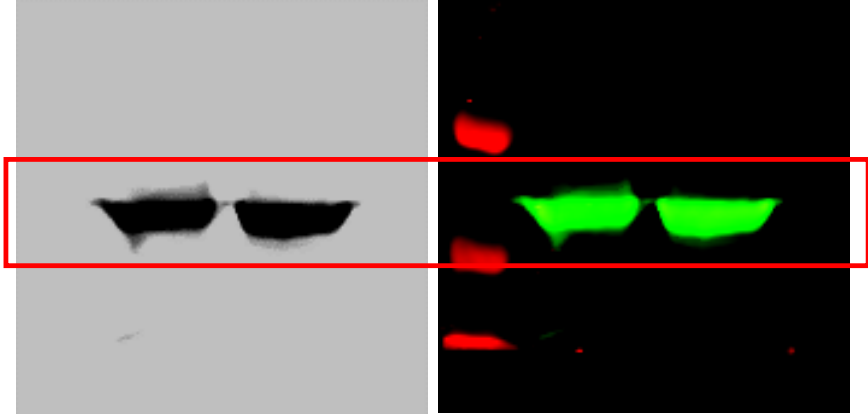

WB: GAPDH

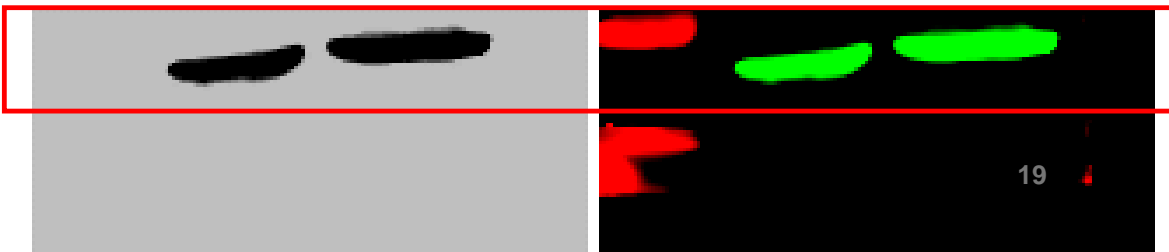

Figure. S5B

WB: Myc-DNMT3B

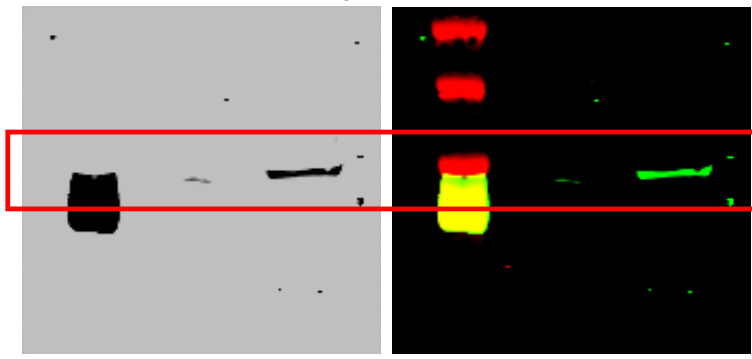

WB: DNMT1

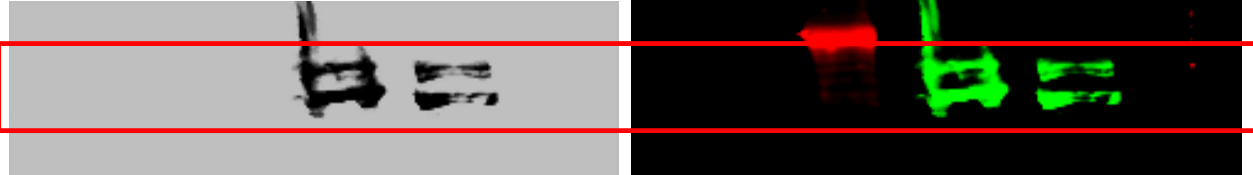

WB: DNMT3A

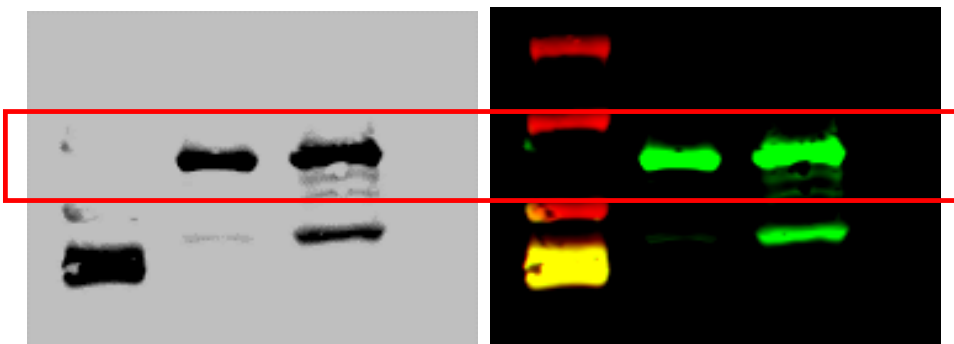

WB: DUOX1

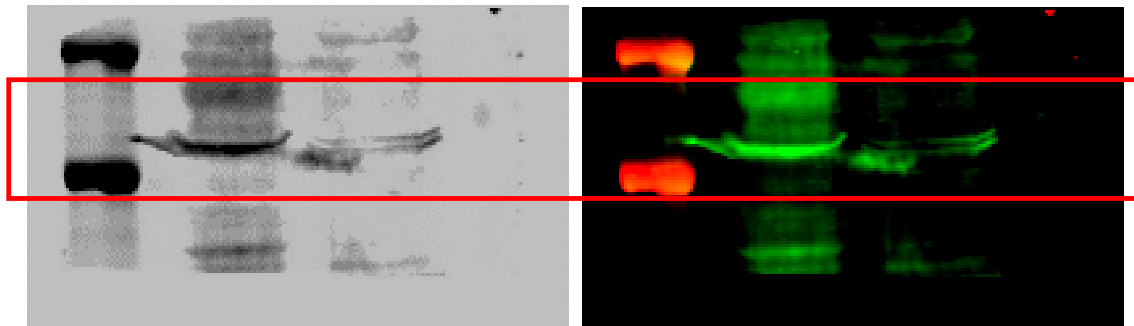

WB: ACTB

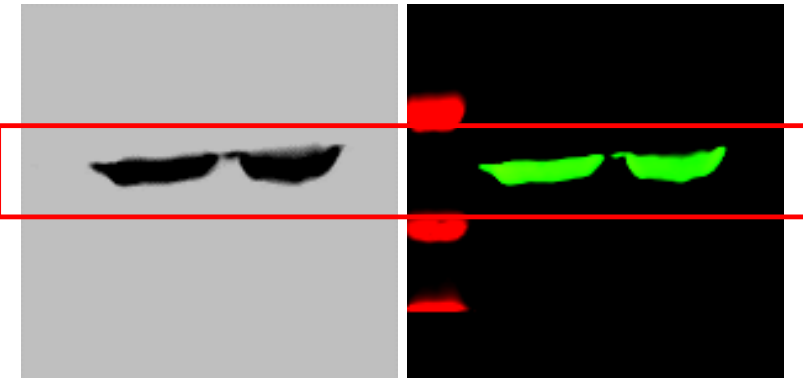

WB: GAPDH

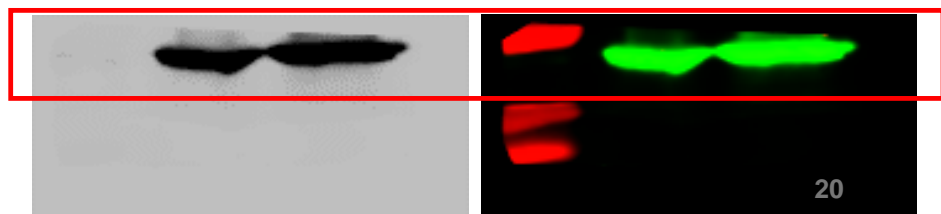

Figure. S9F

WB: V5

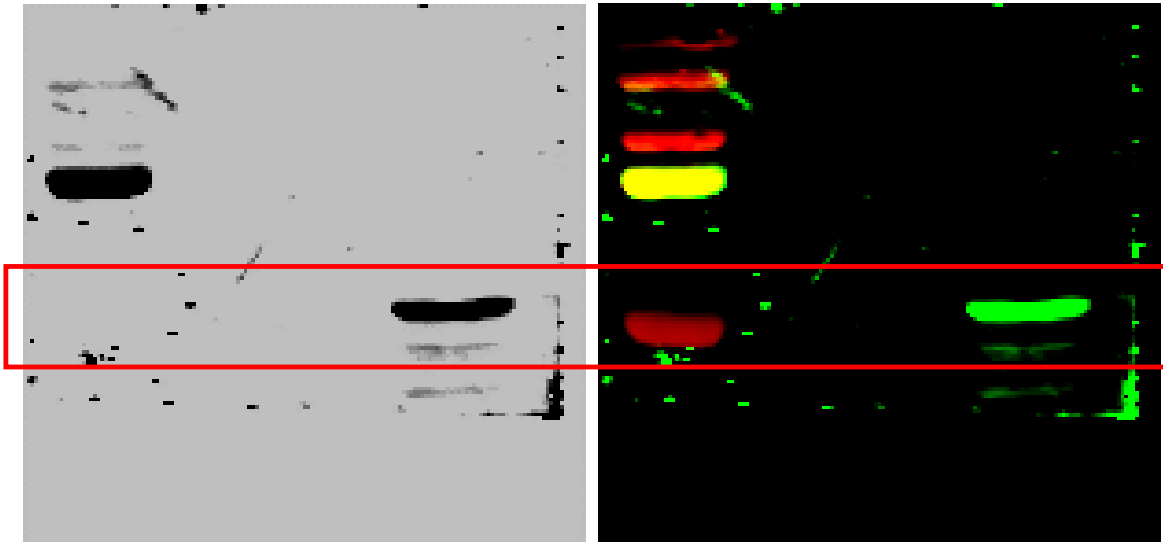

WB: DUOX1

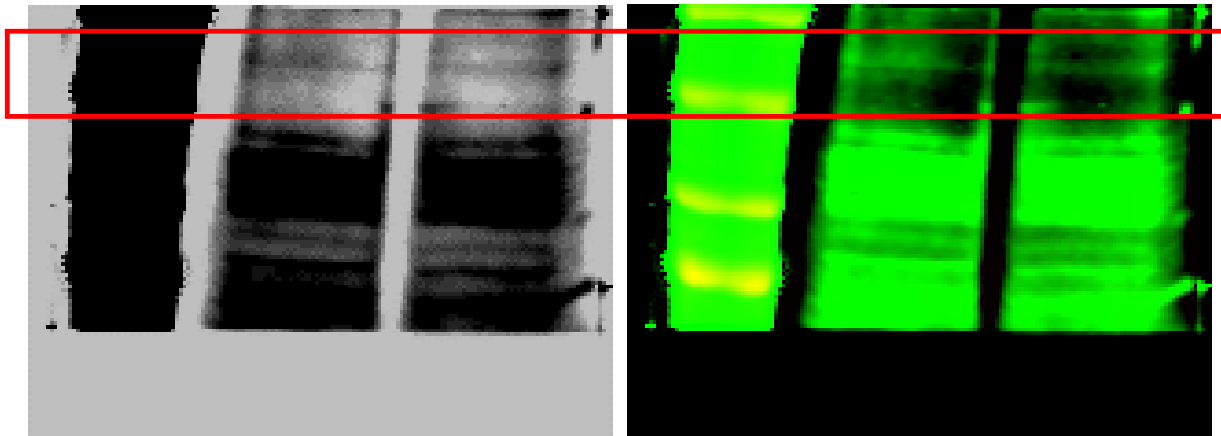

WB: ACTB

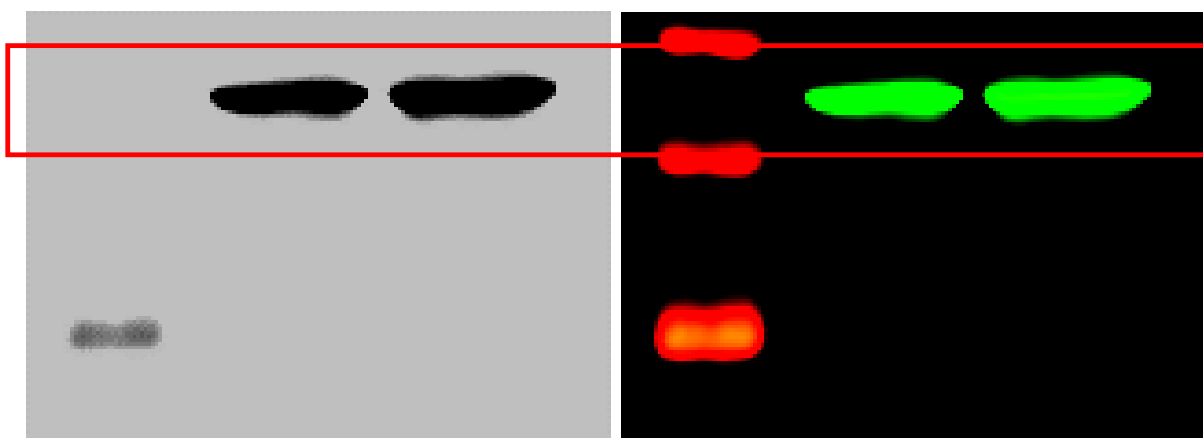

Figure. S9G

WB: FOXA1

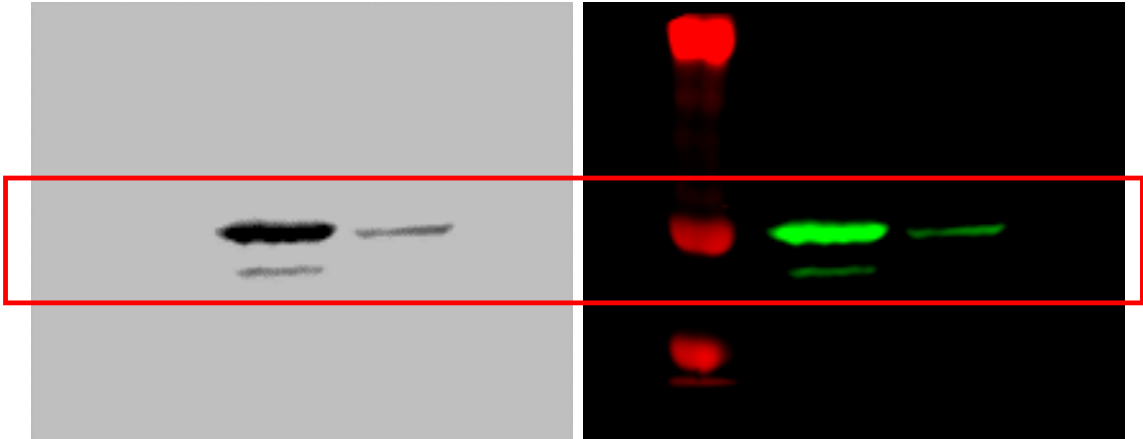

WB: DUOX1

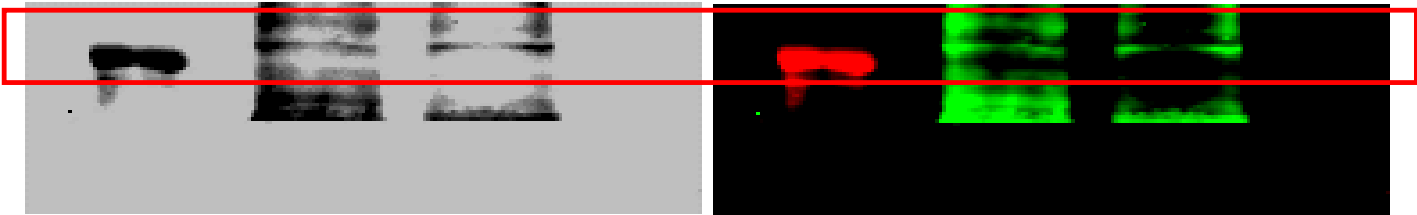

WB: ACTB

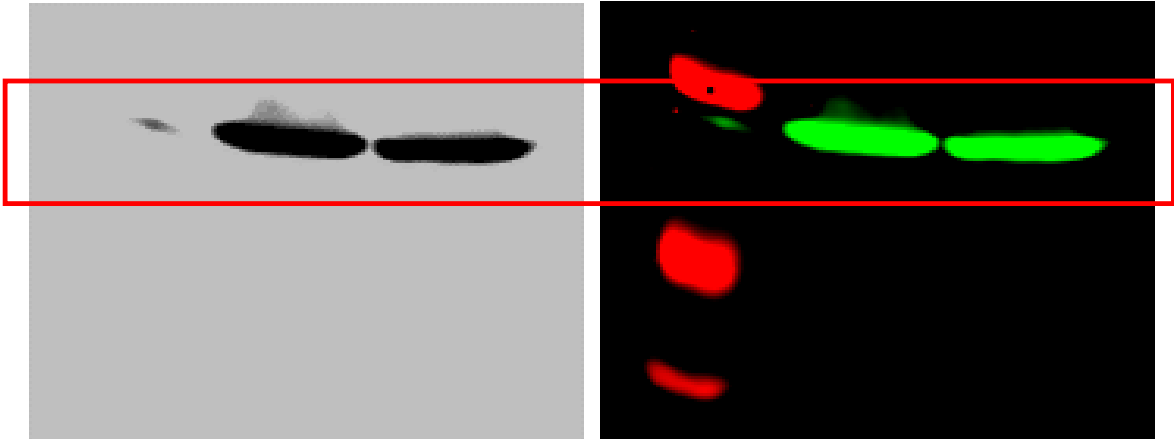

Figure. S11B

WB: DUOX1

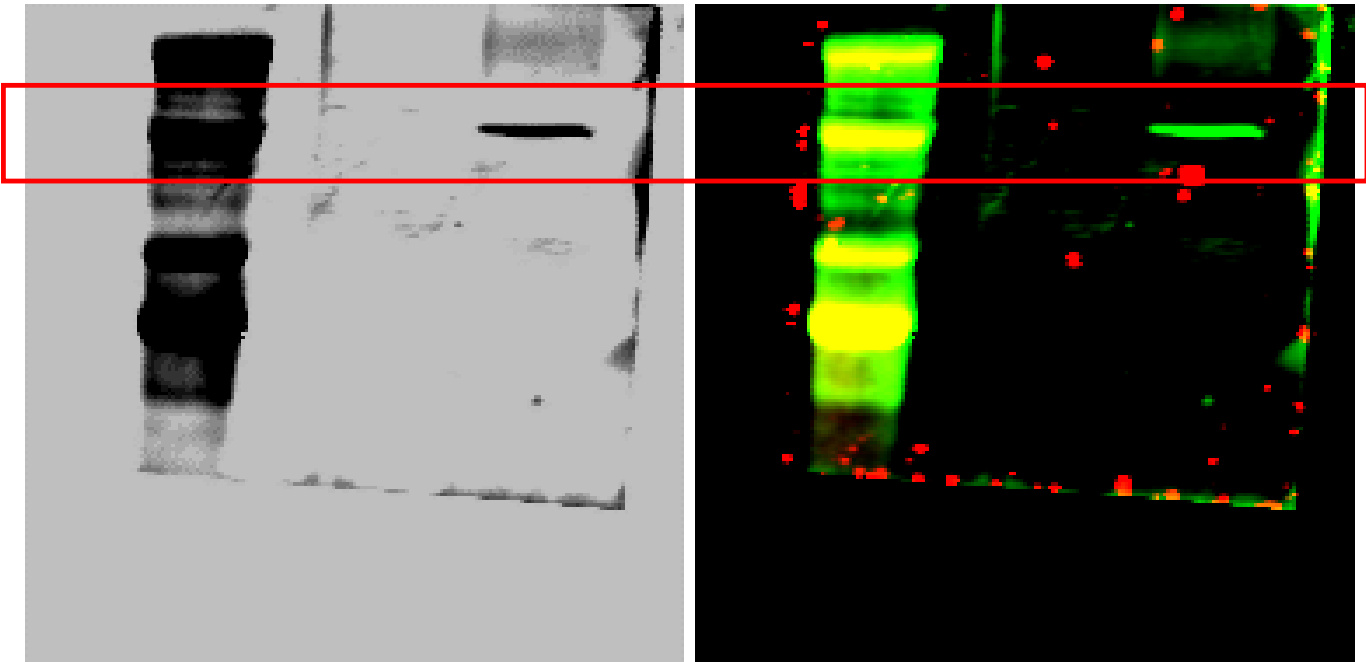

WB: GAPDH

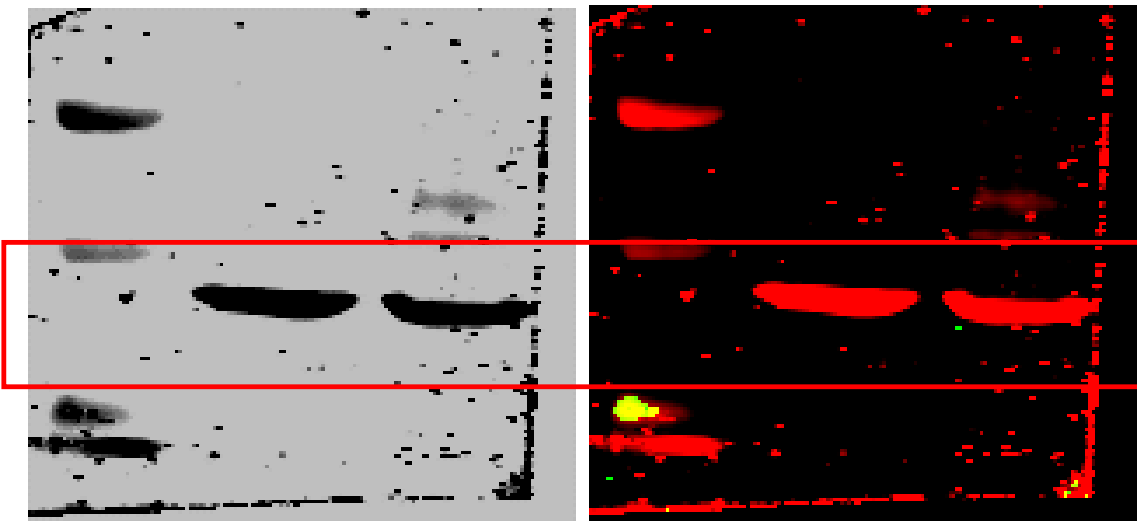

Figure. S11G

WB: Casp3

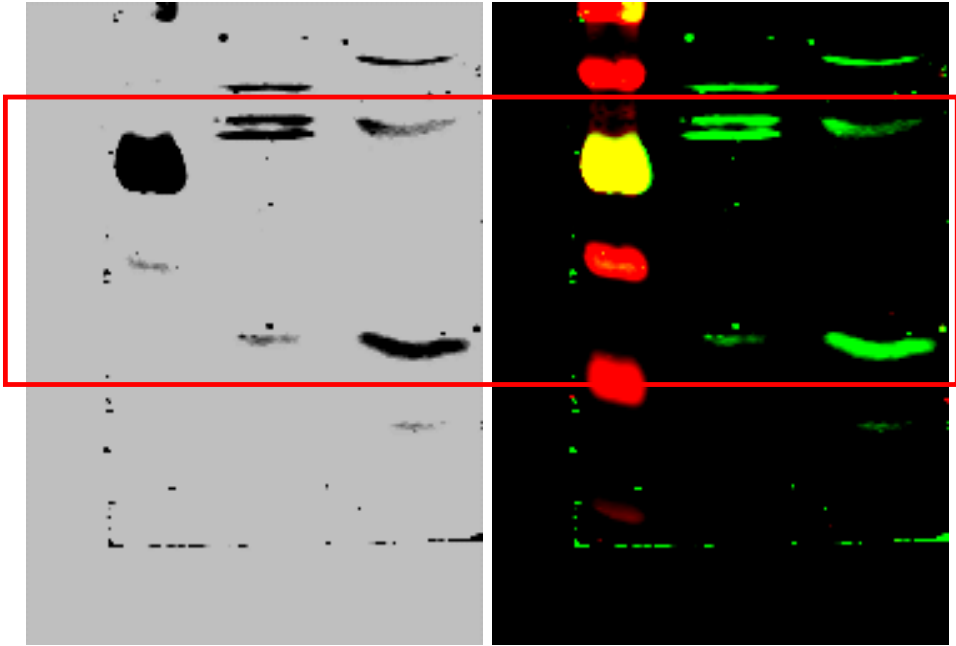

WB: cPARP1

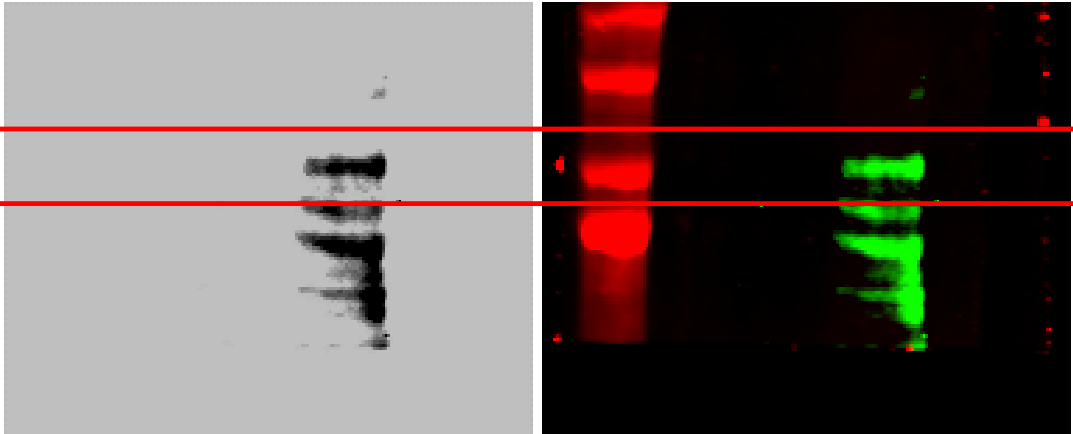

WB: ACTB

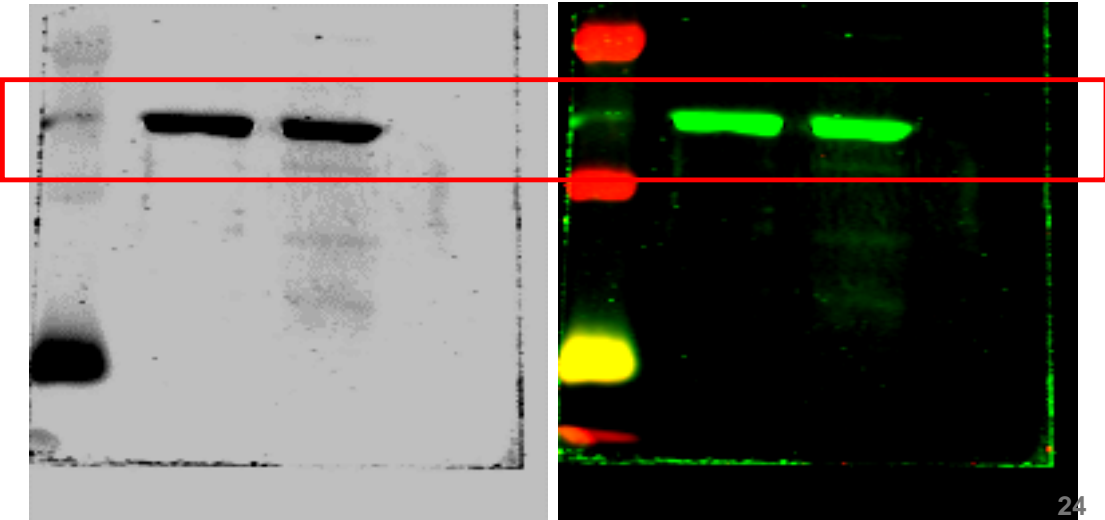

**Figure. S11H**

**WB: DSP**

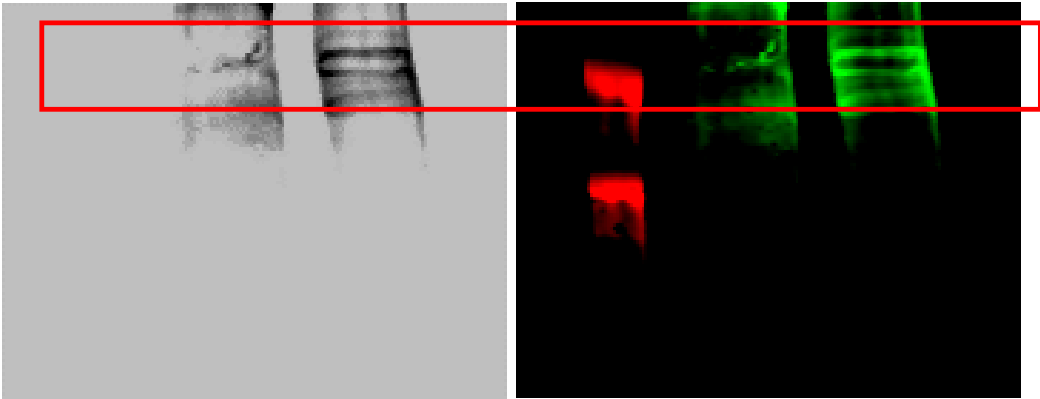

**WB: Vimentin**

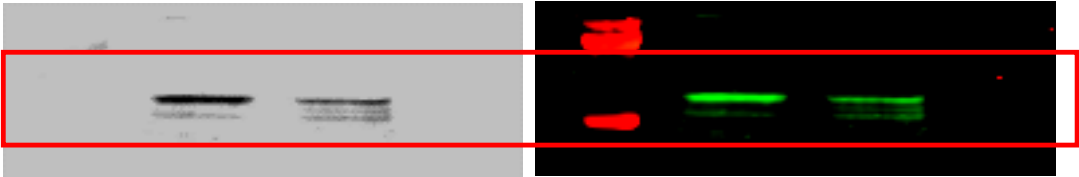

**WB: Snail1**

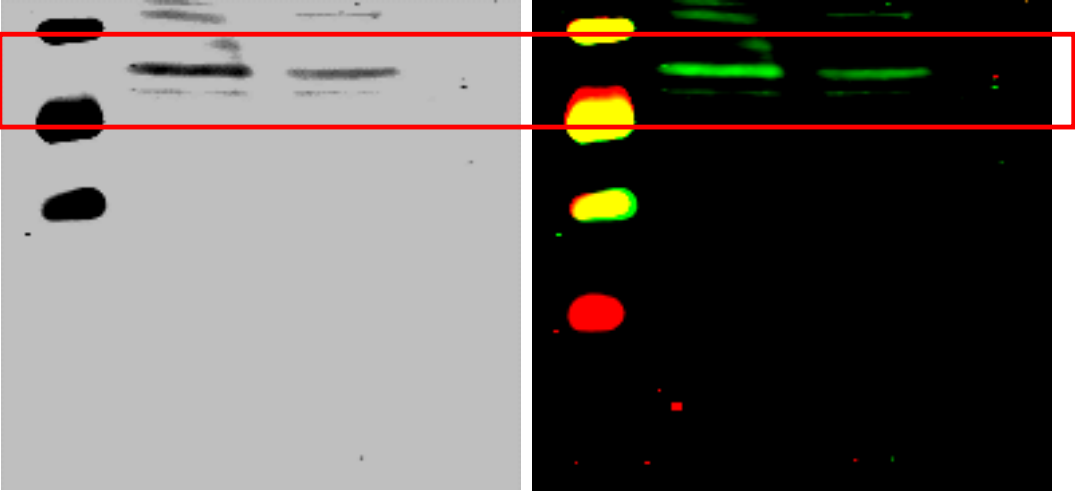

**WB: ACTB**

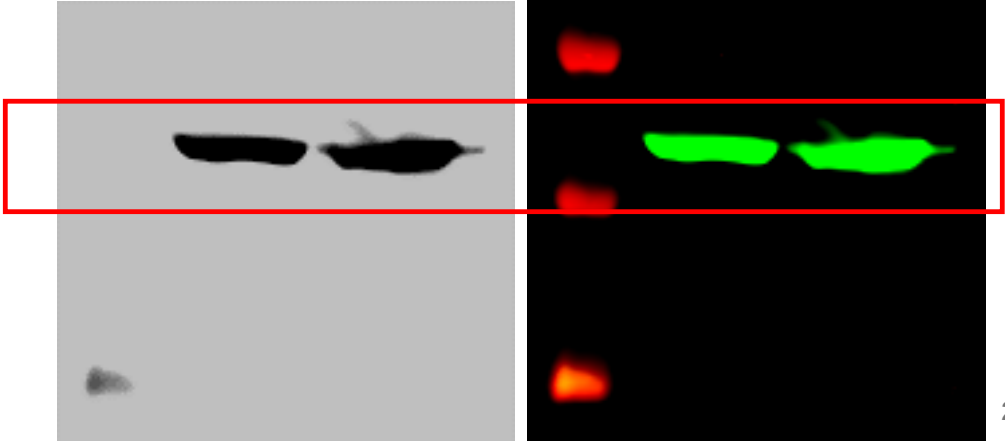

Figure. S15A

WB: AR

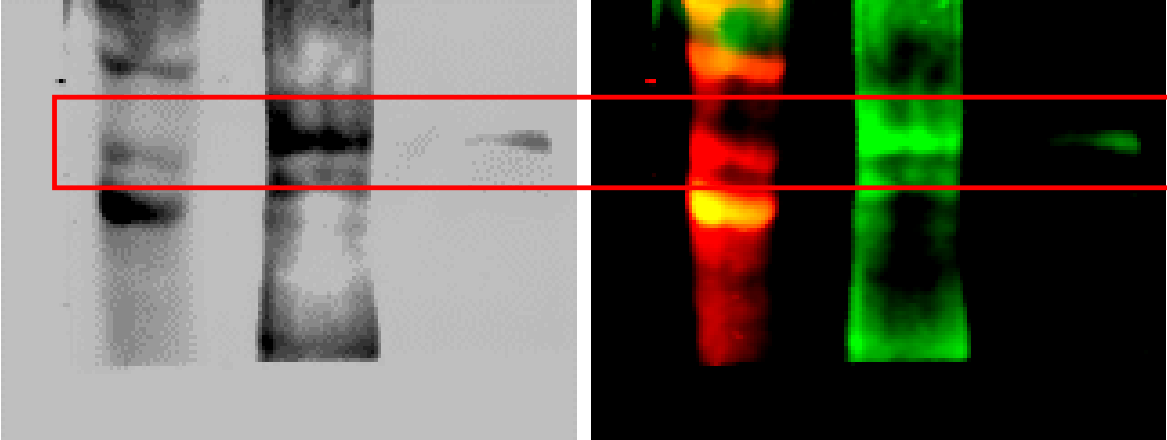

WB: GAPDH

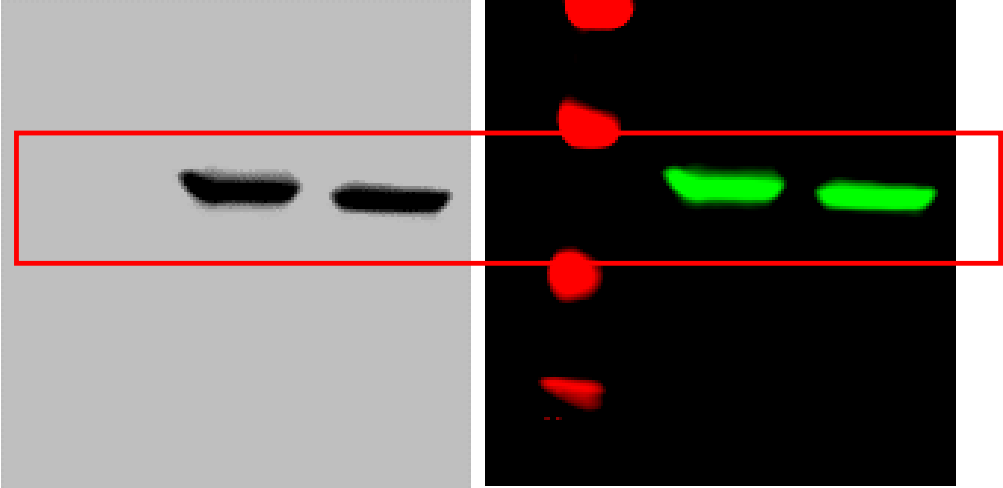

**Figure. S15D**

**WB: AR**

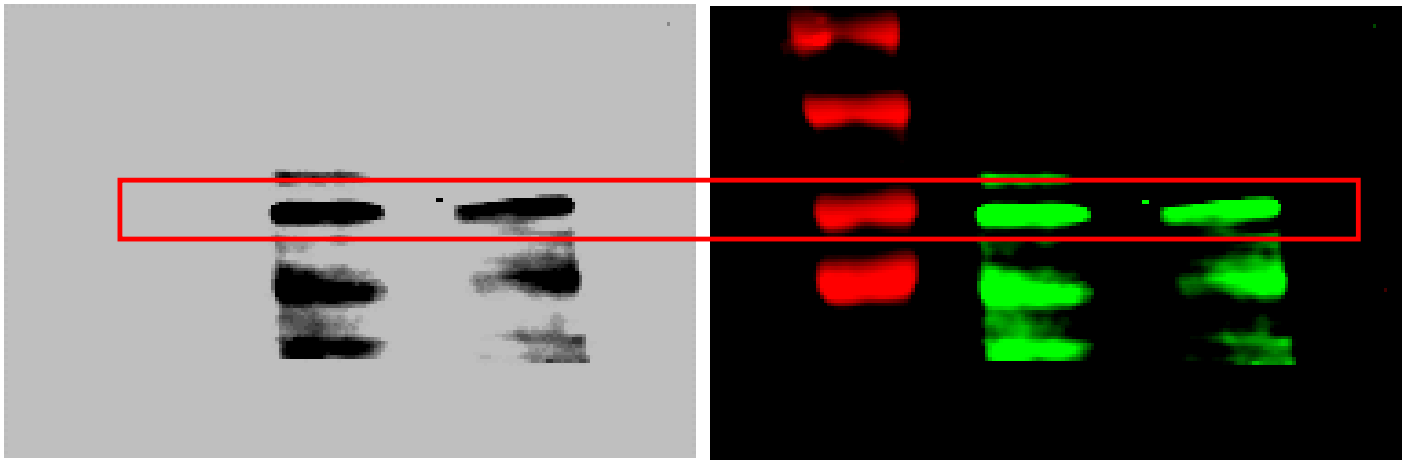

**WB: GAPDH**

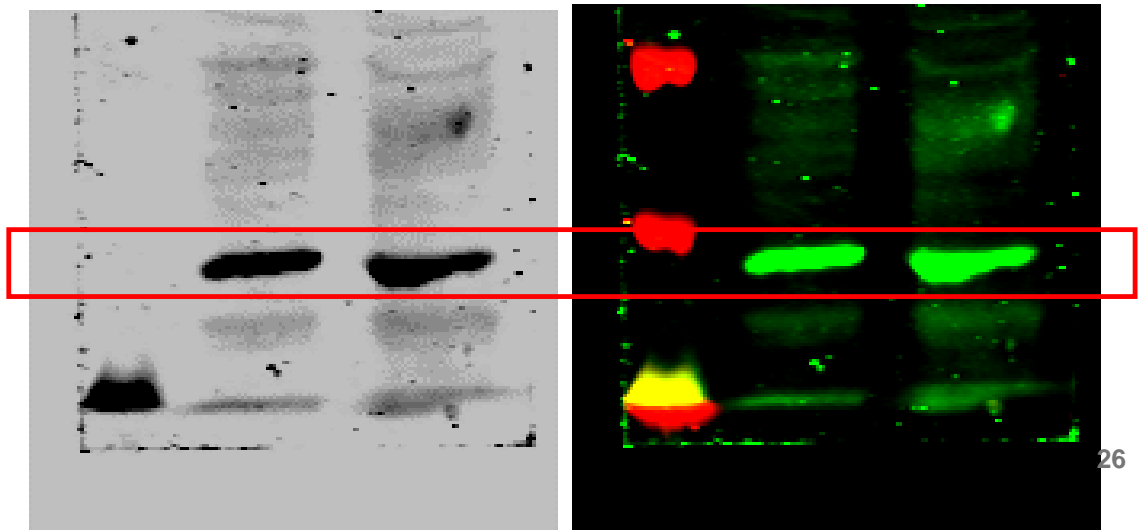

26

**Figure. S15G**

**WB: AR**

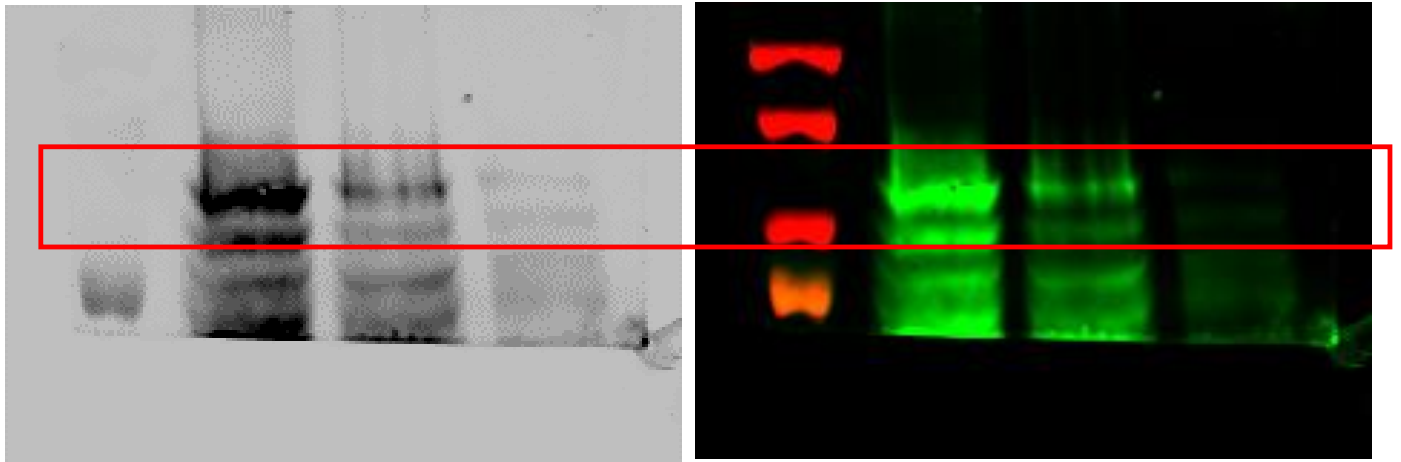

**WB: ACTB**

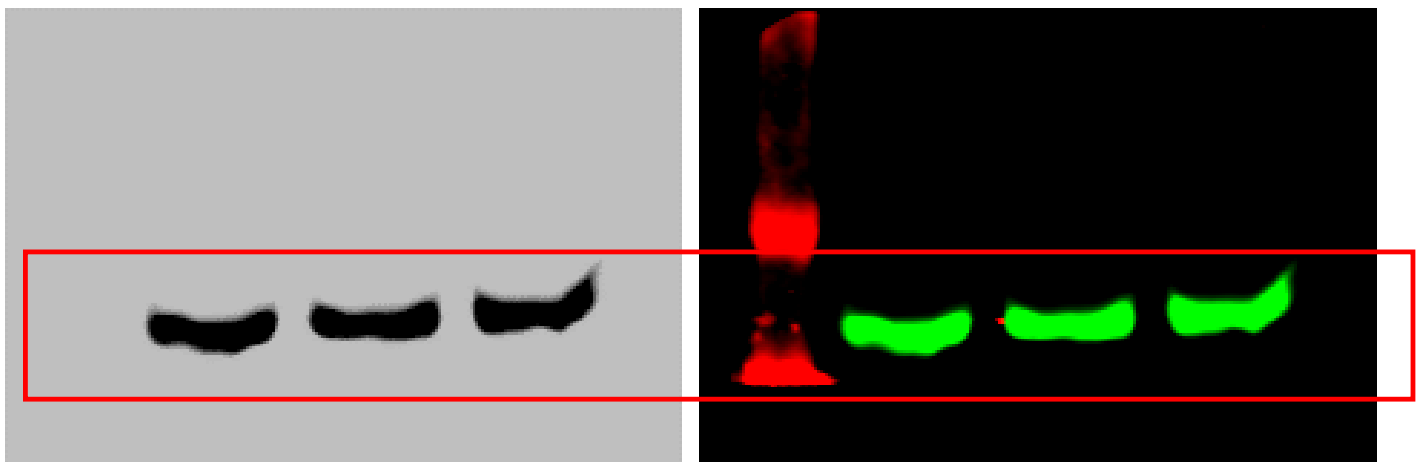

## Original qPCR Data.

Figure. 1F

| Sample Names | Avg DUOX1 ct    | Avg GAPDH ct    | (-) $\Delta$ ct (DUOX1-GAPDH) | Sample Names | Avg DUOX1 ct    | Avg GAPDH ct    | (-) $\Delta$ ct (DUOX1-GAPDH) | p-Value |
|--------------|-----------------|-----------------|-------------------------------|--------------|-----------------|-----------------|-------------------------------|---------|
| BPH1         | 28.7831<br>9339 | 29.0618<br>8767 | 0.278694279                   | PC1          | 31.3842<br>1879 | 27.6454<br>5003 | -<br>3.738768761              | p<0.001 |
| BPH3         | 25.3945<br>847  | 22.8473<br>8182 | -<br>2.547202877              | PC2          | 30.7072<br>2635 | 28.7777<br>2083 | -<br>1.929505522              |         |
| BPH4         | 30.3431<br>8461 | 31.7169<br>418  | 1.373757192                   | PC3          | 31.3012<br>8604 | 24.7010<br>5102 | -<br>6.600235018              |         |
| BPH6         | 28.3163<br>6212 | 27.6194<br>5471 | -<br>0.696907407              | PC4          | 30.8760<br>085  | 22.5162<br>4758 | -<br>8.359760919              |         |
| BPH7         | 28.5731<br>9253 | 28.9397<br>7291 | 0.366580387                   | PC5          | 31.9763<br>8078 | 28.2028<br>7727 | -<br>3.773503518              |         |
| BPH8         | 27.8759<br>2509 | 26.3706<br>2044 | -<br>1.505304653              | PC6          | 30.6199<br>4366 | 22.9122<br>7428 | -<br>7.707669378              |         |
| BPH9         | 28.7564<br>4001 | 28.1801<br>1502 | -<br>0.576324988              | PC7          | 32.1923<br>1062 | 30.3243<br>6921 | -<br>1.867941402              |         |
| BPH10        | 28.8824<br>3722 | 29.4578<br>1612 | 0.575378906                   | PC10         | 29.8730<br>6359 | 25.8345<br>6618 | -<br>4.038497417              |         |

Figure. 2B

|         | Fold Change |         |         |  | STDEV   |         |         |
|---------|-------------|---------|---------|--|---------|---------|---------|
|         | DUOX1       | GAPDH   | B2M     |  | DUOX1   | GAPDH   | B2M     |
| LNCaP   | 0.49231     | 1.84823 | 2.21046 |  | 0.03919 | 0.14107 | 0.30314 |
| DU145   | 2.54199     | 1.72558 | 2.54199 |  | 0.43985 | 0.23347 | 0.26462 |
| p-Value | p<0.05      | ns      |         |  |         |         |         |

Figure. 2D

|       |      | Fold Change  |             |  | STDEV       |             |  | p-Value |       |
|-------|------|--------------|-------------|--|-------------|-------------|--|---------|-------|
|       |      | LNCaP        | DU145       |  | LNCaP       | DU145       |  | LNCaP   | DU145 |
| DUOX1 | DMSO | 1            | 1           |  | 0.3544<br>7 | 0.1093<br>1 |  | p<0.05  | ns    |
|       | AZA  | 13.8469<br>5 | 1.0047<br>5 |  | 2.6584      | 0.6084<br>2 |  |         |       |

Figure. 2N

|        | DU145 | LNCaP   |  | DU145   | LNCaP   |  | DU145   | LNCaP    |
|--------|-------|---------|--|---------|---------|--|---------|----------|
|        | FC    |         |  | STDEV   |         |  | p-Value |          |
| DNMT1  | 1     | 1.44243 |  | 0.13279 | 0.08791 |  | N/A     | 0.094078 |
| DNMT3A | 1     | 7.63334 |  | 0.2     | 0.68673 |  | N/A     | 0.001139 |
| DNMT3B | 1     | 5.37258 |  | 0.63507 | 2.21015 |  | N/A     | 0.211094 |

**Figure. 2V**

|              | % Input (DNMT1-Site 1) |       | p-Value | % Input (DNMT1-Site 2) |       | p-Value |
|--------------|------------------------|-------|---------|------------------------|-------|---------|
|              | IgG                    | DNMT1 |         | IgG                    | DNMT1 |         |
| <b>LNCaP</b> | 0.02                   | 0.03  | 0.43    | 0.006                  | 0.01  | 0.9348  |
|              | 0.023                  | 0.03  |         | 0.006                  | 0.011 |         |
|              | 0.024                  | 0.027 |         | 0.009                  | 0.005 |         |
| <b>DU145</b> | 0.02                   | 0.03  | 0.8635  | 0.03                   | 0.01  | 0.3829  |
|              | 0.014                  | 0.013 |         | 0.02                   | 0.01  |         |
|              | 0.009                  | 0.008 |         | 0.01                   | 0.02  |         |

**Figure. 2W**

|              | % Input (DNMT3A-Site 1) |        | p-Value | % Input (DNMT3A-Site 2) |        | p-Value |
|--------------|-------------------------|--------|---------|-------------------------|--------|---------|
|              | IgG                     | DNMT3A |         | IgG                     | DNMT3A |         |
| <b>LNCaP</b> | 0.013                   | 0.17   | p<0.001 | 0.008                   | 0.16   | p<0.01  |
|              | 0.011                   | 0.17   |         | 0.003                   | 0.114  |         |
|              | 0.015                   | 0.13   |         | 0.01                    | 0.09   |         |
| <b>DU145</b> | 0.05                    | 0.05   | 0.38    | 0.018                   | 0.026  | 0.93    |
|              | 0.04                    | 0.05   |         | 0.028                   | 0.035  |         |
|              | 0.05                    | 0.11   |         | 0.0332                  | 0.0336 |         |

**Figure. 2X**

|              | % Input (DNMT3B-Site 1) |        | p-Value | % Input (DNMT3B-Site 2) |        | p-Value |
|--------------|-------------------------|--------|---------|-------------------------|--------|---------|
|              | IgG                     | DNMT3B |         | IgG                     | DNMT3B |         |
| <b>LNCaP</b> | 0.010                   | 0.07   | p<0.001 | 0.006                   | 0.08   | p<0.001 |
|              | 0.010                   | 0.060  |         | 0.006                   | 0.08   |         |
|              | 0.01                    | 0.07   |         | 0.002                   | 0.06   |         |
| <b>DU145</b> | 0.02                    | 0.03   | 0.08    | 0.021                   | 0.034  | 0.12    |
|              | 0.02                    | 0.03   |         | 0.015                   | 0.027  |         |
|              | 0.01                    | 0.02   |         | 0.015                   | 0.025  |         |

**Figure. 3E**

| <b>DU145</b> | <b>FC</b>  |               |  | <b>STDEV</b> |               |  | <b>p-Value</b> |               |
|--------------|------------|---------------|--|--------------|---------------|--|----------------|---------------|
|              | <b>GFP</b> | <b>GFP-AR</b> |  | <b>GFP</b>   | <b>GFP-AR</b> |  | <b>GFP</b>     | <b>GFP-AR</b> |
| <b>AR</b>    | 1          | 29.68447      |  | 0.08695      | 3.56674       |  | N/A            | 0.001013      |
| <b>DUOX1</b> | 1          | 0.0435        |  | 0.139        | 0.00285       |  | N/A            | 0.001064      |

Figure. 3I

| LNCaP | DUOX1    | p-Value |
|-------|----------|---------|
| DMSO  | 1        |         |
| Enza  | 13.52694 | p<0.05  |
| Bica  | 13.34841 | p<0.05  |

Figure. 4D (AR)

| LNCaP | % Input (AR-Set 1) |       | p-Value | % Input (AR-Set 2) |       | p-Value | % Input (AR-NB) |       | p-Value |
|-------|--------------------|-------|---------|--------------------|-------|---------|-----------------|-------|---------|
|       | IgG                | AR-Ab |         | IgG                | AR-Ab |         | IgG             | AR-Ab |         |
| EtOH  | 0.25               | 0.32  | 0.74    | 0.2                | 0.22  | 0.99    | 0.02            | 0.01  | 0.85    |
|       | 0.56               | 0.61  |         | 0.37               | 0.37  |         | 0.01            | 0.006 |         |
|       | 0.98               | 1.52  |         | 0.18               | 0.35  |         | 0.06            | 0.12  |         |
| DHT   | 0.12               | 2.15  | p<0.001 | 0.04               | 2.59  | 0.004   | 0.01            | 0.02  | 0.87    |
|       | 0.2                | 2.38  |         | 0.06               | 2.3   |         | 0.01            | 0.009 |         |
|       | 0.27               | 2.47  |         | 0.11               | 0.75  |         | 0.004           | 0.038 |         |

Figure. 4D (KLK2)

| LNCaP | % Input (AR) |          | p-Value |
|-------|--------------|----------|---------|
|       | IgG          | KLK2     |         |
| EtOH  | 0.002        | 0.001    | 0.82    |
|       | 0.0008       | 0.0005   |         |
|       | 0.001205     | 0.000185 |         |
| DHT   | 0.002        | 0.031    | p<0.01  |
|       | 0.0008       | 0.027    |         |
|       | 0.001        | 0.025    |         |

Figure. 5B

| LNCaP | % Input (H3K27ac-Set 1) |            | p-Value | % Input (H3K27ac-Set 2) |            | p-Value |
|-------|-------------------------|------------|---------|-------------------------|------------|---------|
|       | IgG                     | H3K27AC-Ab |         | IgG                     | H3K27AC-Ab |         |
| EtOH  | 0.14                    | 2.54       | p<0.001 | 0.26                    | 3.36       | p<0.001 |
|       | 0.12                    | 1.9        |         | 0.25                    | 2.69       |         |
|       | 0.21                    | 2.84       |         | 0.17                    | 3.36       |         |
| DHT   | 0.25                    | 6.38       | p<0.001 | 0.17                    | 4.78       | 0.0112  |
|       | 0.22                    | 5.58       |         | 0.18                    | 5.19       |         |
|       | 0.11                    | 5.76       |         | 0.28                    | 12.65      |         |

Figure. 5C

| LNCaP |               | % Input (BRD4-binding Set 1) | p-Value |                 | % Input (BRD4-binding Set 2) | p-Value |
|-------|---------------|------------------------------|---------|-----------------|------------------------------|---------|
|       | IgG           | BRD4-Ab                      |         | IgG             | BRD4-Ab                      |         |
| EtOH  | 0.03022<br>1  | 0.020344439                  | 0.94    | 0.0208806<br>13 | 0.026376709                  | p>0.99  |
|       | 0.03336<br>8  | 0.037121798                  |         | 0.0117204<br>66 | 0.011346574                  |         |
|       | 0.03952<br>1  | 0.057656496                  |         | 0.0287196<br>83 | 0.028601768                  |         |
| DHT   | 0.02627<br>90 | 0.155722                     | p<0.001 | 0.0163759<br>03 | 0.116376554                  | p<0.001 |
|       | 0.02073<br>60 | 0.107322737                  |         | 0.023           | 0.188                        |         |
|       | 0.02133<br>81 | 0.141212577                  |         | 0.0492791<br>97 | 0.192688608                  |         |

Figure. 5E

| LNCaP | DMSO | JQ1     |  | DMSO    | JQ1     |  | DMSO    | JQ1      |
|-------|------|---------|--|---------|---------|--|---------|----------|
|       | FC   |         |  | STDEV   |         |  | P-Value |          |
| BRD4  | 1    | 0.88651 |  | 0.24885 | 0.31478 |  | N/A     | 0.900532 |
| cMyc  | 1    | 0.17716 |  | 0.27571 | 0.01752 |  | N/A     | 0.043694 |
| DUOX1 | 1    | 9.60924 |  | 0.72679 | 0.49037 |  | N/A     | 0.000498 |
| GAPDH | 1    | 1.0104  |  | 0.74777 | 0.09009 |  | N/A     | 0.766983 |

Figure. 6C

| LNCaP-DUOX1 | Minus DOX | Plus DOX  |  | Minus DOX | Plus DOX  |  | Minus DOX | Plus DOX |
|-------------|-----------|-----------|--|-----------|-----------|--|-----------|----------|
|             | FC        |           |  | STDEV     |           |  | p-Value   |          |
| DUOX1       | 1         | 11273.996 |  | 0.21903   | 1791.1454 |  | N/A       | 0.001669 |

Figure. 6J

| LNCaP-DUOX1  | Minus DOX | Plus DOX |  | Minus DOX | Plus DOX |  | Minus DOX | Plus DOX |
|--------------|-----------|----------|--|-----------|----------|--|-----------|----------|
|              | FC        |          |  | STDEV     |          |  | p-Value   |          |
| p53 (TP53)   | 1         | 16.02848 |  | 0.09542   | 3.65998  |  | N/A       | 0.016175 |
| p21 (CDKN1A) | 1         | 21.57236 |  | 0.12472   | 5.12183  |  | N/A       | 0.000039 |
| B2M          | 1         | 1.24432  |  | 0.24066   | 0.18263  |  | N/A       | 0.489361 |

Figure. 7H

| LNCaP-DUOX1 | DOX   |         |  | DOX     |         |  | DOX     |          |
|-------------|-------|---------|--|---------|---------|--|---------|----------|
|             | Minus | Plus    |  | Minus   | Plus    |  | Minus   | Plus     |
|             | FC    |         |  | STDEV   |         |  | p-Value |          |
| UGT2B11     | 1     | 0.04013 |  | 0.26569 | 0.01186 |  | N/A     | 0.018308 |
| UGT2B28     | 1     | 0.09536 |  | 0.21673 | 0.03054 |  | N/A     | 0.007876 |

Figure. 7L

|      | % Input ((-DOX) AR-binding-UGT2B28) |             | p-Value | % Input ((+DOX) AR-binding-UGT2B28) |             | p-Value |
|------|-------------------------------------|-------------|---------|-------------------------------------|-------------|---------|
|      | IgG                                 | AR-Ab       |         | IgG                                 | AR-Ab       |         |
| EtOH | 0.068                               | 0.035       | 0.70    | 0.08                                | 0.09        | 0.26    |
|      | 0.08                                | 0.1         |         | 0.066666667                         | 0.08        |         |
|      | 0.07                                | 0.02        |         | 0.07                                | 0.08        |         |
|      | 0.065                               | 0.095       |         | 0.05                                | 0.06        |         |
| DHT  | 0.076                               | 0.258       | p<0.001 | 0.07                                | 0.075       | 0.91    |
|      | 0.07                                | 0.41        |         | 0.067142857                         | 0.047142857 |         |
|      | 0.073333333                         | 0.366666667 |         | 0.04                                | 0.04        |         |
|      | 0.073333333                         | 0.36        |         | 0.05                                | 0.07        |         |

Figure. S4G

|        | LNCaP-DMSO | LNCaP-Aza |  | LNCaP-DMSO | LNCaP-Aza |  | LNCaP-DMSO | LNCaP-Aza |
|--------|------------|-----------|--|------------|-----------|--|------------|-----------|
|        | FC         |           |  | STDEV      |           |  | p-Value    |           |
| DNMT1  | 1          | 0.31993   |  | 0.17087    | 0.04023   |  | N/A        | 0.000558  |
| DNMT3A | 1          | 1.03913   |  | 0.45521    | 0.24461   |  | N/A        | 0.805153  |
| DNMT3B | 1          | 1.13615   |  | 0.60349    | 0.18615   |  | N/A        | 0.592993  |

Figure. S9B

|      | % Input (FOXA1-binding Set 1) |          | p-Value | % Input (FOXA1-binding Set 2) |          | p-Value |
|------|-------------------------------|----------|---------|-------------------------------|----------|---------|
|      | IgG                           | FOXA1-Ab |         | IgG                           | FOXA1-Ab |         |
| EtOH | 0.002                         | 0.0109   | 0.28    | 0.0036                        | 0.0155   | 0.83    |
|      | 0.016                         | 0.087    |         | 0.006                         | 0.026    |         |
|      | 0.017                         | 0.105    |         | 0.008                         | 0.020    |         |
| DHT  | 0.027                         | 0.357    | p<0.001 | 0.041                         | 0.592    | p<0.001 |
|      | 0.04                          | 0.225    |         | 0.026                         | 0.467    |         |
|      | 0.022                         | 0.33     |         | 0.050                         | 0.522    |         |

Figure. S11C

| MyC-CaP-DUOX1 | Minus DOX | Plus DOX  | Minus DOX | Plus DOX  | Minus DOX | Plus DOX |
|---------------|-----------|-----------|-----------|-----------|-----------|----------|
|               | FC        |           | STDEV     |           | p-Value   |          |
| DUOX1         | 1         | 21759.822 | 0.45008   | 9493.9128 | N/A       | 0.001112 |

Figure. S15B

| LNCaP-DUOX1 | DOX   |         |  | DOX     |         |  | DOX     |          |
|-------------|-------|---------|--|---------|---------|--|---------|----------|
|             | Minus | Plus    |  | Minus   | Plus    |  | Minus   | Plus     |
|             | FC    |         |  | STDEV   |         |  | p-Value |          |
| AR          | 1     | 0.19074 |  | 0.12858 | 0.0459  |  | N/A     | 0.003477 |
| B2M         | 1     | 0.93026 |  | 0.10349 | 0.23584 |  | N/A     | 0.873774 |

Figure. S15E

| LNCaP | DOX   |         |  | DOX     |         |  | DOX     |          |
|-------|-------|---------|--|---------|---------|--|---------|----------|
|       | Minus | Plus    |  | Minus   | Plus    |  | Minus   | Plus     |
|       | FC    |         |  | STDEV   |         |  | p-Value |          |
| AR    | 1     | 1.19074 |  | 0.23908 | 0.18463 |  | N/A     | 0.750921 |
| B2M   | 1     | 0.97081 |  | 0.20083 | 0.17429 |  | N/A     | 0.981361 |

Figure. S16B

| LNCaP-DUOX1 | FC    |          |  | STDEV   |          |  | P-Value |          |
|-------------|-------|----------|--|---------|----------|--|---------|----------|
|             | Minus | Plus DOX |  | Minus   | Plus DOX |  | Minus   | Plus DOX |
| DUOX1       | 1     | 12.7668  |  | 0.09897 | 1.77554  |  | N/A     | 0.001202 |
| AR          | 1     | 0.03576  |  | 0.26492 | 0.01012  |  | N/A     | 0.014839 |
| MYC         | 1     | 1.0028   |  | 0.07364 | 0.09975  |  | N/A     | 0.93314  |
| SOX2        | 1     | 5.03092  |  | 0.12083 | 0.83971  |  | N/A     | 0.010352 |
| KLF4        | 1     | 3.59363  |  | 0.26272 | 0.41796  |  | N/A     | 0.017441 |
| Nanog       | 1     | 4.59146  |  | 0.0555  | 0.88857  |  | N/A     | 0.011377 |

Figure. S16D

| LNCaP | FC   |         |  | STDEV   |         |  | P-Value |          |
|-------|------|---------|--|---------|---------|--|---------|----------|
|       | DMSO | Enza    |  | DMSO    | Enza    |  | DMSO    | Enza     |
| DUOX1 | 1    | 13.7268 |  | 0.15319 | 3.41889 |  | N/A     | 0.025396 |
| AR    | 1    | 1.25498 |  | 0.12687 | 0.25083 |  | N/A     | 0.359513 |
| MYC   | 1    | 1.04378 |  | 0.16252 | 0.32306 |  | N/A     | 0.766115 |
| SOX2  | 1    | 4.75156 |  | 0.56046 | 0.57051 |  | N/A     | 0.044283 |
| KLF4  | 1    | 3.94512 |  | 0.16057 | 0.18899 |  | N/A     | 0.000666 |
| Nanog | 1    | 4.84523 |  | 0.11896 | 0.58091 |  | N/A     | 0.024592 |
