# Supplementary material
Source: Research Square preprint supplement (doi:10.21203/rs.3.rs-9621447/v1)
Supplement: Supplementary file 1 [file cf733c2d7f449c8b9461baf8.xlsx]

## Sheet: Information
Supplementary Table S2. 850K Methyl array data of eight benign prostate hyperplasia (BPH) and eight prostate cancer (PCa) tissue biopsy samples from 'Discovery Cohort'.
Sheet1	Original Raw Data (Average of Beta Values_BPH & PCa_Promoter Probes)
Sheet2	Initial 20% Beta Value Cut Off (BPH Vs PCa)_Qualified Genes
Sheet3	UALCAN/GEPIA2_TCGA_PRAD_Expression Matched_Qualified Genes
Sheet4	UALCAN/GEPIA2_TCGA_PRAD_Expression Matched_Qualified Genes (p<0.05)
Sheet5	Details of Promoter Probes of These Genes

## Sheet: Sheet1
				BPH									PCa
ID	Gene symbol	UCSC CpG island	UCSC Refgene group	22	106	74	81	102	103	119	75	AVERAGE	324	93	24	187	180	143	131	70	AVERAGE
cg05138383	A1CF		TSS1500;TSS1500;TSS1500;TSS1500;TSS1500;TSS1500	0.641931	0.793237	0.728333	0.785094	0.755095	0.782682	0.709034	0.750207	0.743202	0.74	0.628961	0.675522	0.430682	0.750006	0.479152	0.705025	0.758423	0.645971
cg16531903	A1CF		TSS1500;TSS1500;TSS1500	0.537123	0.721027	0.528873	0.721089	0.596224	0.59484	0.572147	0.480958	0.594035	0.36424	0.441366	0.449551	0.386503	0.56104	0.409233	0.503147	0.56983	0.460614
	A1CF											0.668618									0.553293
cg02230017	A2BP1	Island	TSS200;TSS200	0.0483636	0.0387561	0.122321	0.107415	0.103411	0.611137	0.037288	0.0552851	0.140497	0.0551072	0.358576	0.205641	0.247178	0.0454061	0.163401	0.336429	0.257572	0.208664
cg03586879	A2BP1	N_Shore	TSS1500;TSS1500	0.149631	0.1749	0.167782	0.168904	0.154887	0.42495	0.133095	0.173915	0.193508	0.293629	0.213974	0.215493	0.220365	0.192246	0.162158	0.199581	0.220555	0.21475
cg06447474	A2BP1	N_Shore	TSS1500;TSS1500	0.896768	0.902637	0.866587	0.888298	0.899771	0.906242	0.886383	0.899235	0.89324	0.698734	0.87238	0.867593	0.85585	0.881757	0.684934	0.90931	0.887816	0.832297
cg08255211	A2BP1	N_Shore	TSS1500;TSS1500	0.78173	0.717962	0.719795	0.777129	0.745133	0.762951	0.689245	0.705074	0.737377	0.31118	0.580129	0.694085	0.481916	0.769306	0.663225	0.754345	0.7105	0.620586
cg08545287	A2BP1	Island	TSS200;TSS200	0.0879831	0.0491016	0.0757705	0.0693155	0.121733	0.593831	0.0585957	0.0592401	0.139446	0.161932	0.218543	0.104131	0.144303	0.0749388	0.323871	0.293495	0.13544	0.182082
cg19378133	A2BP1	N_Shore	TSS1500;TSS1500	0.19214	0.160574	0.182239	0.217404	0.150304	0.4321	0.165457	0.200303	0.212565	0.448884	0.273944	0.20949	0.236451	0.147792	0.185153	0.134625	0.286298	0.24033
	A2BP1											0.435227									0.383118
cg00336946	A2LD1	S_Shore	TSS1500	0.89751	0.959675	0.878945	0.916915	0.956213	0.513094	0.935753	0.932505	0.873826	0.854471	0.612079	0.848124	0.678824	0.926811	0.588723	0.788349	0.770667	0.758506
cg01723761	A2LD1	S_Shore	TSS200	0.556262	0.572045	0.591187	0.570698	0.637193	0.463517	0.626458	0.510633	0.565999	0.447948	0.342376	0.44947	0.355715	0.636237	0.426605	0.610328	0.459688	0.466046
cg02923162	A2LD1	S_Shore	TSS1500	0.878692	0.949323	0.892313	0.928146	0.932897	0.689133	0.917068	0.927048	0.889327	0.925123	0.834582	0.888013	0.844543	0.929191	0.706328	0.87121	0.799175	0.849771
cg07218357	A2LD1	S_Shore	TSS200	0.649056	0.801985	0.627073	0.717409	0.749394	0.489988	0.7079	0.740624	0.685429	0.755751	0.487393	0.645842	0.459278	0.721273	0.501966	0.61894	0.578886	0.596166
cg18100153	A2LD1	S_Shore	TSS1500	0.710806	0.783664	0.716675	0.776153	0.781282	0.781035	0.745046	0.759517	0.756772	0.794878	0.780931	0.771003	0.726245	0.751929	0.771857	0.737267	0.809107	0.767902
cg19815813	A2LD1	S_Shore	TSS200	0.75484	0.835409	0.779479	0.769893	0.858026	0.505657	0.807713	0.734966	0.755748	0.646121	0.477131	0.682913	0.501056	0.803519	0.598795	0.767189	0.600065	0.634599
cg25710107	A2LD1	S_Shelf	TSS1500	0.913591	0.934803	0.88531	0.923626	0.904711	0.935414	0.939552	0.928472	0.920685	0.940118	0.925632	0.902747	0.90478	0.887022	0.888561	0.933112	0.883776	0.908219
	A2LD1											0.778255									0.711601
cg00134295	A2M		TSS1500	0.338907	0.445552	0.226883	0.413563	0.292201	0.247238	0.247603	0.280945	0.311611	0.395237	0.474558	0.213399	0.263584	0.293596	0.293233	0.28252	0.341469	0.3197
cg00146928	A2M		TSS1500	0.812993	0.864391	0.714294	0.832582	0.85488	0.619044	0.811887	0.843117	0.794149	0.719119	0.773135	0.679996	0.632261	0.792608	0.739396	0.764429	0.801914	0.737857
cg02215627	A2M		TSS200	0.688816	0.717196	0.515488	0.70874	0.688918	0.436145	0.627267	0.641488	0.628007	0.629351	0.639903	0.435953	0.510047	0.627809	0.589289	0.663283	0.607018	0.587832
cg07324869	A2M		TSS200	0.510584	0.522953	0.441523	0.556058	0.516553	0.46432	0.400836	0.538848	0.493959	0.595327	0.529266	0.440685	0.461101	0.467073	0.461931	0.421455	0.47217	0.481126
cg10537824	A2M		TSS1500	0.373637	0.610401	0.48778	0.617397	0.637707	0.390778	0.395562	0.504653	0.502239	0.563038	0.638159	0.347515	0.393965	0.530305	0.427031	0.404166	0.449509	0.469211
cg15545700	A2M		TSS1500	0.677	0.668849	0.459847	0.691777	0.621886	0.267678	0.376552	0.542249	0.53823	0.520641	0.524614	0.339827	0.519238	0.597095	0.379437	0.620831	0.563829	0.508189
cg18100935	A2M		TSS1500	0.865022	0.86373	0.750136	0.845585	0.868168	0.706321	0.823311	0.861575	0.822981	0.832247	0.850796	0.808125	0.721821	0.836489	0.815049	0.837801	0.851033	0.81917
cg20086047	A2M		TSS200	0.588827	0.572602	0.526969	0.604162	0.518737	0.447	0.434684	0.597881	0.536358	0.591501	0.600865	0.462111	0.470453	0.482066	0.524374	0.434634	0.541475	0.513435
	A2M											0.578442									0.554565
cg12168926	A2ML1		TSS1500	0.875563	0.906732	0.865436	0.828954	0.90347	0.904099	0.906951	0.88654	0.884718	0.913449	0.916337	0.886617	0.910489	0.907839	0.894889	0.860942	0.893094	0.897957
cg15769388	A2ML1		TSS1500	0.400668	0.402571	0.504105	0.438936	0.458195	0.305593	0.396093	0.336611	0.405346	0.348824	0.273657	0.229224	0.158458	0.458933	0.30679	0.405884	0.331932	0.314213
cg23546356	A2ML1		TSS1500	0.624777	0.678941	0.609835	0.634339	0.702315	0.474887	0.575607	0.634243	0.616868	0.362732	0.538735	0.500343	0.36689	0.572462	0.480741	0.541941	0.570148	0.491749
	A2ML1											0.635644									0.567973
cg14335324	A2MP1		TSS1500	0.898236	0.870765	0.805183	0.845618	0.907096	0.915851	0.858116	0.920147	0.877626	0.78727	0.890661	0.683958	0.639857	0.792799	0.704376	0.870421	0.852238	0.777698
cg17837371	A2MP1		TSS200	0.933451	0.944263	0.916981	0.932118	0.941399	0.933653	0.938341	0.925471	0.93321	0.901977	0.931866	0.814273	0.79242	0.919098	0.837597	0.943479	0.933486	0.884274
cg21386674	A2MP1		TSS200	0.918732	0.939346	0.90259	0.942145	0.934055	0.93254	0.931934	0.916343	0.927211	0.926468	0.921451	0.828304	0.733771	0.918617	0.792697	0.932027	0.932465	0.873225
cg22294666	A2MP1		TSS200	0.699156	0.842477	0.560491	0.663825	0.642145	0.335447	0.648386	0.729753	0.64021	0.386556	0.548355	0.481705	0.513987	0.572853	0.482426	0.676233	0.564767	0.52836
cg23570073	A2MP1		TSS1500	0.928967	0.933921	0.909709	0.932288	0.916538	0.945634	0.935343	0.928537	0.928867	0.878892	0.932827	0.876455	0.743151	0.92376	0.807567	0.946835	0.935189	0.880584
cg26435646	A2MP1		TSS1500	0.946589	0.958986	0.921089	0.953294	0.953979	0.954566	0.948349	0.944836	0.947711	0.955282	0.94476	0.914903	0.850306	0.94041	0.923735	0.945122	0.948798	0.927914
	A2MP1											0.875806									0.812009
cg01951142	A3GALT2		TSS1500	0.701389	0.851986	0.783311	0.797637	0.836102	0.760002	0.767872	0.809159	0.788432	0.69014	0.748814	0.681075	0.542228	0.733948	0.493411	0.713229	0.764387	0.670904
cg10516967	A3GALT2		TSS1500	0.529031	0.563946	0.567256	0.569973	0.565303	0.627593	0.58549	0.563673	0.571533	0.683293	0.63449	0.557772	0.552566	0.596834	0.439963	0.536333	0.582749	0.573
cg15115816	A3GALT2		TSS1500	0.821138	0.787755	0.806154	0.809699	0.832878	0.827748	0.808607	0.772548	0.808316	0.749448	0.769831	0.773132	0.833921	0.831917	0.833176	0.837307	0.818711	0.80593
cg16253149	A3GALT2		TSS1500	0.869301	0.897899	0.875872	0.875911	0.902783	0.928858	0.870429	0.912157	0.891651	0.897345	0.933971	0.892877	0.928947	0.897475	0.905176	0.929437	0.906674	0.911488
cg20648539	A3GALT2		TSS1500	0.592322	0.736895	0.65939	0.67511	0.713408	0.612373	0.673993	0.699904	0.670424	0.624803	0.620346	0.587083	0.483473	0.675063	0.431311	0.604687	0.627481	0.581781
cg22586448	A3GALT2		TSS200	0.753327	0.885164	0.784377	0.824263	0.873665	0.845908	0.779988	0.82408	0.821346	0.924384	0.838682	0.77023	0.723237	0.77906	0.631682	0.773307	0.794487	0.779384
cg27629276	A3GALT2		TSS200	0.772015	0.881531	0.808576	0.844881	0.871306	0.894563	0.831735	0.900124	0.850591	0.860834	0.870704	0.730058	0.75528	0.801053	0.630182	0.837899	0.807321	0.786666
	A3GALT2											0.771756									0.729879
cg01268859	A4GALT	S_Shore	TSS1500	0.0344447	0.043108	0.0632883	0.0562693	0.0707522	0.0291765	0.0321175	0.0440482	0.0466506	0.0838736	0.0875255	0.0296683	0.0651289	0.0553598	0.048106	0.0234667	0.040646	0.0542219
cg04188877	A4GALT	S_Shore	TSS1500	0.567673	0.608287	0.573339	0.550411	0.554171	0.640826	0.61555	0.588397	0.587332	0.616411	0.675432	0.568196	0.670064	0.591326	0.591181	0.628363	0.678286	0.627407
cg05727648	A4GALT	S_Shore	TSS1500	0.0337719	0.0298051	0.0350478	0.0323143	0.0298039	0.0283211	0.0293104	0.0281657	0.0308175	0.0286347	0.049059	0.0321961	0.0279439	0.0374898	0.0342718	0.0270433	0.0291827	0.0332277
cg07393322	A4GALT	S_Shore	TSS1500	0.106636	0.118358	0.118755	0.146397	0.12839	0.0789522	0.0913979	0.0870519	0.109492	0.100288	0.184031	0.102258	0.0922383	0.117524	0.0985866	0.0592726	0.102585	0.107098
cg10115263	A4GALT	S_Shore	TSS1500	0.82339	0.844636	0.774228	0.789167	0.805376	0.757078	0.838367	0.655797	0.786005	0.608969	0.766492	0.739203	0.748949	0.80907	0.795656	0.815434	0.794475	0.759781
cg14286439	A4GALT	Island	TSS200	0.0256074	0.0235323	0.0262939	0.0266452	0.0220001	0.0242177	0.0196592	0.0214407	0.0236746	0.0210658	0.0243588	0.0225474	0.0249405	0.0273986	0.0249631	0.017561	0.0244982	0.0234167
cg18877862	A4GALT	Island	TSS200	0.325837	0.258653	0.288537	0.272073	0.293386	0.317242	0.278891	0.225383	0.2825	0.261375	0.292421	0.23639	0.344024	0.313193	0.276975	0.307687	0.227216	0.28241
cg20706071	A4GALT	Island	TSS200	0.04613	0.0410553	0.0308889	0.0527288	0.0332105	0.0182287	0.0245694	0.0249914	0.0339754	0.0245851	0.0255301	0.021695	0.0189678	0.0456624	0.0664175	0.0120128	0.0351152	0.0312482
cg21007318	A4GALT	S_Shore	TSS1500	0.149684	0.182432	0.188688	0.236744	0.200902	0.129484	0.149779	0.147771	0.173186	0.129652	0.258476	0.128309	0.16336	0.187298	0.180995	0.0891566	0.176641	0.164236
cg23219305	A4GALT	S_Shore	TSS1500	0.0351358	0.0567831	0.0494474	0.0972875	0.0615969	0.0268829	0.0507183	0.0361473	0.0517499	0.0248095	0.103804	0.0347938	0.0329205	0.0535325	0.0427705	0.0220854	0.0482408	0.0453696
cg26705472	A4GALT	Island	TSS1500	0.0285071	0.0265868	0.0222593	0.0382989	0.0319459	0.0403955	0.0348821	0.0179825	0.0301073	0.0271031	0.0184087	0.0293022	0.026436	0.0352839	0.0217459	0.0126656	0.0223637	0.0241636
	A4GALT											0.195954									0.195689
cg18931888	A4GNT		TSS1500	0.933292	0.94027	0.899788	0.933474	0.934033	0.938698	0.932384	0.927801	0.929968	0.948065	0.938581	0.923896	0.928558	0.927784	0.918711	0.95061	0.93184	0.933506
cg19734045	A4GNT		TSS1500	0.868099	0.901116	0.819405	0.847925	0.882483	0.894933	0.877013	0.83352	0.865562	0.823125	0.844459	0.778973	0.795114	0.886469	0.688281	0.911486	0.871443	0.824919
cg23669440	A4GNT		TSS1500	0.6739	0.750531	0.642221	0.777207	0.72846	0.746441	0.638178	0.699722	0.707083	0.524103	0.64905	0.594062	0.448439	0.692903	0.558957	0.751787	0.725968	0.618159
	A4GNT											0.834204									0.792194
cg02427438	AAAS	Island	TSS200	0.0374715	0.0308733	0.0321751	0.0389893	0.0365871	0.0310844	0.0309307	0.030638	0.0335937	0.0295162	0.0335627	0.0332196	0.0319294	0.0384417	0.0324041	0.0283205	0.0310802	0.0323093
cg05224385	AAAS	S_Shore	TSS1500	0.0240224	0.0508354	0.0436216	0.089953	0.0809363	0.0211638	0.0367725	0.0338278	0.0476416	0.0472868	0.0261541	0.0329301	0.0515454	0.0715169	0.0332993	0.0272505	0.0369354	0.0408648
cg07833959	AAAS	N_Shore	TSS1500;TSS1500	0.872419	0.815328	0.821956	0.841641	0.830066	0.839279	0.844879	0.838612	0.838023	0.834949	0.815753	0.835168	0.777191	0.811779	0.85213	0.866116	0.847964	0.830131
cg08253513	AAAS	S_Shore	TSS200	0.0786235	0.0324509	0.0397149	0.0515339	0.046623	0.0365494	0.036498	0.026262	0.0435319	0.0352537	0.0263019	0.0314462	0.0630931	0.0493834	0.0494085	0.0419146	0.0326589	0.0411825
cg10448052	AAAS	S_Shore	TSS1500	0.312008	0.376973	0.312321	0.327372	0.296678	0.10466	0.327255	0.335009	0.299034	0.241976	0.0175034	0.300226	0.328145	0.371791	0.292332	0.271403	0.315666	0.26738
cg10765909	AAAS	Island	TSS200	0.23356	0.151603	0.186655	0.205096	0.250121	0.1861	0.183398	0.131853	0.191048	0.0631616	0.167864	0.192958	0.204072	0.220692	0.167242	0.229339	0.269021	0.189294
cg12104984	AAAS	Island	TSS200	0.017284	0.0182793	0.0156544	0.0196001	0.0224735	0.0168494	0.0180022	0.0171868	0.0181662	0.0215778	0.0153254	0.0196567	0.0207621	0.0224132	0.0167749	0.0117559	0.0158147	0.0180101
cg22861965	AAAS	S_Shore	TSS1500	0.0201275	0.0414902	0.0310505	0.044798	0.0374815	0.0311322	0.022058	0.0294467	0.0321981	0.03017	0.0257298	0.0233806	0.0429726	0.0401209	0.0232509	0.0181211	0.0276353	0.0289227
	AAAS											0.187905									0.181012
cg00649906	AACS	N_Shore	TSS1500	0.0469162	0.03222	0.034762	0.0542663	0.0289446	0.0271795	0.0330924	0.027233	0.0355767	0.0245069	0.0268614	0.0317557	0.035572	0.0480216	0.0356709	0.0226291	0.0309521	0.0319962
cg04621673	AACS	N_Shore	TSS1500	0.0722398	0.0479579	0.0467394	0.063139	0.0494491	0.0582308	0.0557199	0.0334604	0.053367	0.0307929	0.0325252	0.0552071	0.0467345	0.0571696	0.046189	0.0419791	0.0417557	0.0440441
cg05303448	AACS	N_Shore	TSS1500	0.122119	0.118365	0.0490747	0.0824523	0.114148	0.132604	0.130738	0.106983	0.107061	0.085104	0.0848719	0.105816	0.115842	0.0984851	0.0632761	0.0738223	0.0965532	0.0904713
cg06604102	AACS	Island	TSS200	0.0267775	0.050051	0.0438019	0.0583555	0.05137	0.044539	0.0383596	0.0602	0.0466818	0.0960549	0.0373241	0.0521678	0.0478373	0.0789395	0.0396013	0.0412998	0.0452887	0.0548142
cg06844689	AACS	Island	TSS200	0.020754	0.0179377	0.0174272	0.0208544	0.0208859	0.0156889	0.0163037	0.0190577	0.0186137	0.0194104	0.0187411	0.0186793	0.0168525	0.0195806	0.0172758	0.0149722	0.0174053	0.0178647
cg08332330	AACS	Island	TSS200	0.0182995	0.0199751	0.020698	0.0232644	0.0185833	0.0177884	0.0154752	0.0177037	0.0189734	0.0135768	0.0189037	0.0258022	0.0176877	0.0318094	0.0211606	0.0136368	0.0180746	0.0200815
cg09606697	AACS	Island	TSS200	0.0189453	0.02314	0.0210475	0.0227465	0.019566	0.0190173	0.0188536	0.0216225	0.0206173	0.0142705	0.0202281	0.0225562	0.0197557	0.025153	0.0207173	0.0170419	0.0225589	0.0202852
cg15709169	AACS	Island	TSS200	0.026481	0.0278234	0.0228563	0.0312073	0.0271211	0.0272077	0.0223335	0.0285083	0.0266923	0.0179276	0.0251907	0.0294075	0.025425	0.039319	0.0250426	0.0173691	0.0258551	0.0256921
cg25961336	AACS	Island	TSS1500	0.011652	0.0153675	0.0125938	0.0147411	0.0105453	0.012237	0.0109925	0.0117219	0.0124814	0.011921	0.0125856	0.014031	0.0153082	0.0173785	0.0128347	0.00767628	0.0126896	0.0130531
	AACS											0.0377849									0.0353669
cg03228145	AACSL		TSS1500	0.7384	0.81988	0.54046	0.715998	0.767279	0.853356	0.82658	0.769341	0.753912	0.827078	0.851747	0.779797	0.885197	0.757059	0.801368	0.87791	0.785785	0.820743
cg15296538	AACSL		TSS200	0.91802	0.936802	0.881593	0.930196	0.925939	0.926052	0.931912	0.928601	0.922389	0.922481	0.932272	0.926114	0.934986	0.935922	0.924498	0.935715	0.928429	0.930052
cg21473545	AACSL		TSS200	0.650199	0.762815	0.572666	0.7431	0.677291	0.73976	0.724236	0.695401	0.695684	0.713678	0.763344	0.632746	0.707362	0.73762	0.612246	0.696917	0.72906	0.699122
cg25314111	AACSL		TSS1500	0.945263	0.953649	0.927789	0.937348	0.944984	0.952808	0.956163	0.943206	0.945151	0.958457	0.941079	0.93626	0.943882	0.9257	0.935424	0.950158	0.94092	0.941485
cg27597459	AACSL		TSS1500	0.700388	0.80435	0.490781	0.719105	0.703221	0.812294	0.727098	0.711978	0.708652	0.779344	0.822752	0.788909	0.78874	0.744194	0.744965	0.794324	0.765791	0.778627
	AACSL											0.805158									0.834006
cg05564657	AADAC		TSS1500	0.908748	0.915917	0.32513	0.908198	0.887707	0.926375	0.867663	0.893131	0.829109	0.911276	0.92835	0.828726	0.857126	0.882489	0.80063	0.891251	0.928794	0.87858
cg13001012	AADAC		TSS1500	0.768426	0.848323	0.639261	0.763345	0.754395	0.808341	0.710358	0.774537	0.758373	0.789369	0.857606	0.677513	0.823818	0.785431	0.629679	0.834558	0.784037	0.772751
	AADAC											0.793741									0.825666
cg25159668	AADACL2		TSS1500	0.825435	0.879544	0.840271	0.880615	0.886342	0.917909	0.864026	0.838324	0.866558	0.87839	0.911122	0.806131	0.817903	0.884585	0.773554	0.897942	0.909881	0.859938
	AADACL2											0.866558									0.859938
cg07452753	AADACL2-AS1		TSS200;TSS200	0.899481	0.895458	0.918652	0.919253	0.924118	0.94961	0.927815	0.886083	0.915059	0.872886	0.87806	0.887297	0.869419	0.918361	0.893043	0.947321	0.908057	0.896806
cg15567717	AADACL2-AS1		TSS200;TSS200	0.88834	0.878556	0.868796	0.899564	0.896794	0.935709	0.901957	0.876533	0.893281	0.89393	0.864757	0.874855	0.844481	0.896621	0.899151	0.920386	0.875767	0.883743
cg27190859	AADACL2-AS1		TSS200;TSS200	0.939054	0.928946	0.897626	0.915299	0.954389	0.95193	0.931243	0.894139	0.926578	0.865036	0.894178	0.902477	0.883755	0.92357	0.917583	0.939271	0.870864	0.899592
	AADACL2-AS1											0.911639									0.89338
cg01097325	AADACL3		TSS1500;TSS1500	0.859722	0.909241	0.845434	0.840265	0.930412	0.881883	0.879572	0.870905	0.877179	0.920231	0.917895	0.819446	0.829796	0.879212	0.776427	0.862585	0.920364	0.865745
cg04505750	AADACL3		TSS1500;TSS1500	0.625531	0.665573	0.550326	0.655958	0.684179	0.572801	0.749552	0.687946	0.648983	0.46429	0.77338	0.555822	0.583877	0.656124	0.426479	0.733713	0.631735	0.603178
cg12377113	AADACL3		TSS200;TSS200	0.869642	0.88877	0.836575	0.870027	0.893804	0.884426	0.858323	0.833414	0.866873	0.91235	0.851452	0.841043	0.751835	0.858278	0.790617	0.886592	0.858515	0.843835
cg19620994	AADACL3		TSS1500;TSS1500	0.819376	0.838148	0.716926	0.858221	0.879444	0.833597	0.910538	0.840401	0.837081	0.902189	0.886622	0.812161	0.703745	0.87305	0.659511	0.872776	0.835402	0.818182
cg25495929	AADACL3		TSS1500;TSS1500	0.887268	0.912483	0.818107	0.881858	0.888133	0.879934	0.901875	0.871865	0.88019	0.766173	0.874189	0.841971	0.838562	0.867494	0.70984	0.909923	0.851749	0.832488
cg26433816	AADACL3		TSS1500;TSS1500	0.733651	0.915184	0.791764	0.854536	0.847614	0.894578	0.88205	0.880493	0.849984	0.763707	0.891687	0.739462	0.761461	0.815039	0.609096	0.904686	0.840769	0.790738
	AADACL3											0.826715									0.792361
cg01040782	AADACL4		TSS200	0.946952	0.941796	0.917933	0.911399	0.910085	0.920716	0.93453	0.92994	0.926669	0.924248	0.943254	0.931168	0.946187	0.933458	0.914925	0.950728	0.263031	0.850875
cg05274300	AADACL4		TSS1500	0.554506	0.479677	0.47844	0.594175	0.52331	0.630996	0.674433	0.587071	0.565326	0.737842	0.798673	0.563424	0.656303	0.606978	0.524318	0.667777	0.625155	0.647559
cg06751920	AADACL4		TSS1500	0.793881	0.688619	0.676304	0.788341	0.711442	0.867444	0.815712	0.775166	0.764614	0.845973	0.87013	0.764561	0.710592	0.789609	0.773249	0.846229	0.808688	0.801129
cg07875832	AADACL4		TSS1500	0.839718	0.889329	0.79981	0.890839	0.875205	0.874386	0.890016	0.884766	0.868009	0.733153	0.808278	0.72082	0.676904	0.842319	0.685223	0.798609	0.91317	0.772309
cg09518518	AADACL4		TSS1500	0.790384	0.728906	0.781491	0.803828	0.762825	0.925195	0.898508	0.859829	0.818871	0.905681	0.909619	0.768133	0.877806	0.817065	0.868687	0.854284	0.849296	0.856321
cg11157076	AADACL4		TSS1500	0.849271	0.752485	0.861633	0.8675	0.7998	0.941653	0.91584	0.897391	0.860697	0.917197	0.929015	0.863527	0.915034	0.822291	0.893757	0.927022	0.881628	0.893684
cg22668398	AADACL4		TSS1500	0.822012	0.772839	0.79769	0.842019	0.786533	0.889489	0.868361	0.862521	0.830183	0.891575	0.923609	0.806711	0.880492	0.831436	0.869742	0.827951	0.890629	0.865268
	AADACL4											0.80491									0.812449
cg00150882	AADAT	Island	TSS1500;TSS200	0.130795	0.0961505	0.224295	0.181354	0.171112	0.0739507	0.152307	0.127289	0.144657	0.126466	0.0474612	0.108596	0.0733527	0.128268	0.12164	0.059029	0.126024	0.0988546
cg01654582	AADAT	S_Shore	TSS1500;TSS1500	0.0923003	0.0397417	0.0676448	0.0728077	0.0569816	0.0372872	0.0610632	0.0551255	0.060369	0.0550645	0.0248307	0.0488627	0.0462835	0.051398	0.052667	0.026884	0.0383249	0.0430394
cg02602915	AADAT	S_Shore	TSS1500;TSS1500	0.0867337	0.075194	0.10374	0.104021	0.0967041	0.0639808	0.0891052	0.0867155	0.0882743	0.0766335	0.0621476	0.0706461	0.0720409	0.118027	0.0989301	0.0313451	0.066567	0.0745422
cg03796513	AADAT	S_Shore	TSS1500;TSS200;TSS1500;TSS1500	0.0426615	0.0354869	0.0742234	0.0661889	0.063134	0.0588086	0.0708688	0.0629258	0.0592872	0.0680109	0.0333259	0.0640585	0.0423708	0.06916	0.0551713	0.0334681	0.0543482	0.0524892
cg06339629	AADAT	Island	TSS1500;TSS200	0.0803422	0.0338929	0.124506	0.120821	0.103718	0.0448252	0.0591486	0.0688083	0.0795078	0.0275735	0.0257761	0.0272457	0.03179	0.0622302	0.0315956	0.0379796	0.0411895	0.0356725
cg07678449	AADAT	Island	TSS1500;TSS200	0.0210096	0.0217146	0.0229633	0.0246292	0.0261997	0.0223319	0.0297887	0.0222679	0.0238631	0.0149047	0.0222311	0.0202219	0.0225364	0.0251801	0.0222089	0.0226513	0.0218537	0.0214735
cg08010276	AADAT	S_Shore	TSS1500;TSS1500;TSS1500;TSS1500	0.423071	0.358903	0.538636	0.474962	0.365996	0.297867	0.433831	0.441903	0.416896	0.218478	0.226398	0.320638	0.228196	0.398501	0.314587	0.275938	0.398518	0.297657
cg09371608	AADAT	S_Shore	TSS1500;TSS200;TSS1500;TSS1500	0.275365	0.176384	0.320526	0.31864	0.2273	0.159142	0.260191	0.229967	0.245939	0.189137	0.165281	0.193032	0.120626	0.252064	0.190134	0.197008	0.242079	0.19367
cg12874587	AADAT	S_Shore	TSS1500;TSS1500;TSS1500	0.72545	0.668343	0.581146	0.724516	0.731597	0.74681	0.766451	0.625761	0.696259	0.703993	0.560776	0.516095	0.593344	0.71878	0.528098	0.711719	0.605754	0.61732
cg14239811	AADAT	Island	TSS1500;TSS200	0.0238884	0.0258192	0.0358138	0.0400207	0.0283999	0.0140427	0.0209764	0.025223	0.026773	0.0224926	0.0154049	0.0248753	0.0175759	0.0347274	0.0188904	0.0136543	0.017284	0.0206131
cg17371000	AADAT	S_Shore	TSS1500;TSS1500;TSS1500;TSS1500	0.606087	0.610572	0.598331	0.664264	0.630197	0.654079	0.602398	0.614619	0.622568	0.578477	0.617546	0.581457	0.571624	0.633767	0.620928	0.620496	0.61384	0.604767
cg18716979	AADAT	Island	TSS1500;TSS200	0.149473	0.0933014	0.145584	0.138968	0.0924063	0.081181	0.0841777	0.0735817	0.107334	0.0724479	0.0764809	0.100638	0.114778	0.157032	0.0982921	0.0924337	0.105573	0.102209
cg24120085	AADAT	S_Shore	TSS1500;TSS1500	0.918625	0.897893	0.865816	0.904549	0.918898	0.944918	0.95041	0.869642	0.908844	0.929986	0.64183	0.926494	0.832337	0.88309	0.6726	0.945013	0.758361	0.823714
cg24519394	AADAT	S_Shore	TSS1500;TSS1500;TSS1500;TSS1500	0.777656	0.705958	0.746055	0.750084	0.789611	0.761954	0.790874	0.690648	0.751605	0.662572	0.670408	0.672494	0.66264	0.746004	0.74056	0.816376	0.715557	0.710826
cg25521407	AADAT	S_Shore	TSS1500;TSS200;TSS1500;TSS1500	0.0840533	0.0659852	0.102061	0.107028	0.0696117	0.0523491	0.0895845	0.0686731	0.0799182	0.064947	0.0458157	0.0624638	0.0575111	0.0917222	0.0553417	0.0430259	0.0753485	0.062022
	AADAT											0.287473									0.250591
cg07903985	AAED1	S_Shore	TSS1500	0.12607	0.0896965	0.100938	0.092706	0.11113	0.124782	0.12009	0.0752677	0.105085	0.222681	0.0922859	0.114843	0.15255	0.135901	0.121383	0.0896991	0.0926962	0.127755
cg08610840	AAED1	S_Shore	TSS200	0.0220237	0.0194092	0.0216714	0.0228551	0.0201821	0.0178569	0.017297	0.0216528	0.0203685	0.0158186	0.00363817	0.0189284	0.0190208	0.0226109	0.0222706	0.015509	0.019152	0.0171186
cg20386868	AAED1	S_Shore	TSS200	0.0112385	0.0146178	0.0108297	0.0133088	0.0119919	0.0109919	0.0100406	0.0114146	0.0118042	0.0112666	0.00934924	0.0117105	0.0128894	0.0168631	0.012125	0.00772711	0.0153702	0.0121626
cg27335928	AAED1	S_Shore	TSS200	0.0100485	0.0142707	0.0141883	0.012802	0.0131445	0.00941451	0.0120154	0.0124584	0.0122928	0.0121183	0.0120395	0.0108183	0.0139689	0.018009	0.0135923	0.00805413	0.0127627	0.0126704
	AAED1											0.0373876									0.0424266
cg16926284	AAGAB	Island	1stExon;TSS200;5'UTR;TSS200	0.0146327	0.0191402	0.0193799	0.0171846	0.0168626	0.0130562	0.0160566	0.0150462	0.0164199	0.0213937	0.0153233	0.0162903	0.0188959	0.0231858	0.0167324	0.0121291	0.0188109	0.0178452
cg20940607	AAGAB	Island	1stExon;TSS200;5'UTR;TSS200	0.0688123	0.0682264	0.0461259	0.0543588	0.0544274	0.0371918	0.0529228	0.0376655	0.0524664	0.18595	0.0326681	0.0640624	0.120504	0.0973976	0.0484864	0.0431637	0.0464181	0.0798313
cg23718275	AAGAB	Island	1stExon;1stExon;TSS200;TSS200;TSS200;TSS200;TSS200;5'UTR;5'UTR;5'UTR	0.0194403	0.0223597	0.011348	0.0118523	0.0111392	0.00839335	0.0084784	0.010298	0.0129137	0.0600941	0.00897979	0.0126644	0.0180404	0.0437051	0.0101667	0.00894959	0.0134942	0.0220118
	AAGAB											0.0272666									0.0398961
cg00864384	AAK1	Island	TSS200	0.0802783	0.0635884	0.084308	0.0882436	0.0544606	0.0744231	0.0718716	0.0526286	0.0712253	0.1231	0.0447251	0.0433105	0.100303	0.120061	0.0629559	0.043211	0.0540569	0.0739654
cg01272601	AAK1	Island	TSS1500	0.0179633	0.0264958	0.0230835	0.0261229	0.0309508	0.0254186	0.0202288	0.0220012	0.0240331	0.0289262	0.0229705	0.0233632	0.020158	0.0343201	0.0253971	0.0184433	0.0268055	0.025048
cg09040972	AAK1	Island	TSS1500	0.019055	0.0261828	0.0234967	0.0255884	0.0295292	0.0210984	0.0220746	0.0235729	0.0238247	0.054711	0.0240958	0.0217901	0.0321138	0.0322972	0.0266102	0.023878	0.0245022	0.0299998
cg09125157	AAK1	Island	TSS1500	0.0210659	0.0227657	0.0204302	0.0276997	0.0209725	0.0187996	0.0197953	0.0218526	0.0216727	0.0686463	0.0206351	0.020194	0.027498	0.0273974	0.0273226	0.0190358	0.0177234	0.0285566
cg11223003	AAK1	Island	TSS1500	0.0217866	0.0210607	0.0252352	0.0246877	0.0196269	0.0235178	0.0225369	0.0198789	0.0222913	0.0179067	0.0215758	0.0228832	0.0213431	0.0297217	0.0224682	0.0231293	0.0210668	0.0225118
cg11232947	AAK1	S_Shore	TSS1500	0.0345718	0.0295741	0.0297298	0.0425482	0.0332896	0.035391	0.0215009	0.0247552	0.0314201	0.104748	0.0271895	0.0414428	0.0501904	0.0428764	0.0384031	0.0167367	0.0278529	0.04368
cg14054964	AAK1	S_Shore	TSS1500	0.0141755	0.0221983	0.0310944	0.0338664	0.0269698	0.0223438	0.0337659	0.0181658	0.0253225	0.040417	0.0157511	0.0270241	0.0480695	0.0368255	0.0458459	0.0326622	0.0178592	0.0330568
cg16062558	AAK1	Island	TSS200	0.0212891	0.0258032	0.0213523	0.0238232	0.0239203	0.0238523	0.0262508	0.0183174	0.0230761	0.0597384	0.0165637	0.0226504	0.0348051	0.030755	0.0206602	0.0160747	0.0222814	0.0279411
cg20663997	AAK1	S_Shore	TSS1500	0.0312534	0.0261805	0.035736	0.0291938	0.0337569	0.0255682	0.023774	0.0310147	0.0295597	0.0326699	0.0258299	0.0277562	0.0186587	0.0414791	0.0382322	0.0221119	0.025156	0.0289867
cg21174435	AAK1	Island	TSS1500	0.0304376	0.0330735	0.0330354	0.0439258	0.0372566	0.0270645	0.0316997	0.0288303	0.0331654	0.0217675	0.0330754	0.0349869	0.0295559	0.0395078	0.0364813	0.0256807	0.0317541	0.0316012
cg22629907	AAK1	Island	TSS200	0.163342	0.134748	0.171579	0.20219	0.138861	0.106711	0.132728	0.137545	0.148463	0.0577525	0.1147	0.158212	0.146816	0.204452	0.0790918	0.0571121	0.128955	0.118386
cg22875476	AAK1	Island	TSS1500	0.0175224	0.0241827	0.0208988	0.0268257	0.0244684	0.019927	0.0186362	0.0213044	0.0217207	0.0279055	0.0176282	0.0239574	0.0239027	0.0349464	0.0230978	0.0166835	0.0223709	0.0238116
cg24925546	AAK1	Island	TSS200	0.0613804	0.0435365	0.0423771	0.046599	0.0516037	0.0290733	0.0377984	0.0308249	0.0428992	0.0693466	0.0268082	0.0394819	0.0478123	0.051987	0.0341484	0.0396056	0.0353571	0.0430684
	AAK1											0.039898									0.0408164
cg07947315	AAMDC	Island	TSS200;TSS1500	0.0196437	0.02396	0.0192005	0.0255548	0.0220267	0.0212988	0.0189927	0.0231352	0.0217265	0.0182409	0.0232628	0.0190709	0.0211693	0.0298245	0.0208998	0.0191282	0.0186136	0.0212763
cg19851979	AAMDC	Island	TSS200;TSS1500	0.0383351	0.0321714	0.0343706	0.0391077	0.0400456	0.0376213	0.0330839	0.0347161	0.0361815	0.0209486	0.0395201	0.0421649	0.0338916	0.0396331	0.0341024	0.0264121	0.0327223	0.0336744
cg20895389	AAMDC	Island	TSS1500;TSS200	0.0280618	0.0255057	0.0247974	0.0281955	0.0288997	0.0316182	0.0283142	0.023303	0.0273369	0.0240733	0.0294368	0.0309602	0.034673	0.043768	0.0285901	0.0242095	0.0254743	0.0301482
cg21215416	AAMDC	Island	TSS200;TSS1500	0.0432243	0.0376133	0.042854	0.0445784	0.0380199	0.0350581	0.0463519	0.035275	0.0403719	0.0236631	0.0458435	0.0483241	0.0458182	0.0504521	0.0484707	0.0361706	0.0401071	0.0423562
cg21227845	AAMDC	Island	TSS1500;TSS200	0.0129639	0.013097	0.0103854	0.0145489	0.0128777	0.0105775	0.0109743	0.0111343	0.0120699	0.0126853	0.0115552	0.0134714	0.014465	0.0200433	0.0128114	0.00834157	0.0121773	0.0131938
	AAMDC											0.0275373									0.0281298
cg00083700	AANAT		TSS200;TSS200;Body	0.802493	0.707308	0.754572	0.761907	0.723733	0.88518	0.741986	0.73799	0.764396	0.87301	0.816232	0.795528	0.760018	0.728966	0.811497	0.78332	0.719589	0.78602
cg00564869	AANAT		TSS1500;TSS1500;Body	0.764897	0.858656	0.848462	0.81277	0.798496	0.83034	0.815981	0.798558	0.81602	0.892264	0.792304	0.741451	0.734531	0.734591	0.786825	0.782099	0.841856	0.78824
cg01204666	AANAT	Island	TSS200;TSS200	0.0110009	0.0138466	0.0144584	0.0153589	0.0122683	0.0118324	0.0110941	0.0130348	0.0128618	0.0121926	0.0116882	0.0125425	0.0145385	0.0200349	0.0118503	0.00941662	0.0119784	0.0130303
cg10557475	AANAT		TSS1500;TSS1500;Body	0.631007	0.701933	0.668355	0.708208	0.683752	0.712915	0.664454	0.721392	0.686502	0.707837	0.711554	0.601104	0.591458	0.651761	0.653792	0.606645	0.697596	0.652718
	AANAT											0.569945									0.560002
cg11423094	AAR2	N_Shore	TSS1500;TSS1500	0.880643	0.928808	0.857442	0.904339	0.901833	0.905716	0.914151	0.891908	0.898105	0.906283	0.910526	0.850357	0.887364	0.876503	0.860342	0.903049	0.907989	0.887802
cg20067578	AAR2	N_Shore	TSS1500;TSS1500	0.461836	0.429691	0.561981	0.575935	0.464696	0.415242	0.476018	0.564645	0.493755	0.45487	0.450317	0.403574	0.434185	0.522062	0.407243	0.381189	0.438418	0.436482
cg24004865	AAR2	N_Shore	TSS200;TSS200	0.0138388	0.0168776	0.0143224	0.0165706	0.0133765	0.015371	0.0127856	0.00989341	0.0141295	0.017216	0.0123735	0.0139549	0.0231356	0.0202249	0.0125593	0.011265	0.0131386	0.0154835
cg26851745	AAR2	N_Shore	TSS1500;TSS1500	0.461752	0.393815	0.568589	0.543668	0.470322	0.438786	0.491991	0.579233	0.493519	0.464173	0.45085	0.40661	0.449922	0.540496	0.404038	0.379443	0.442212	0.442218
	AAR2											0.474877									0.445496
cg05385881	AARD	N_Shore	TSS1500	0.904608	0.933539	0.887405	0.915159	0.920748	0.900977	0.914376	0.903275	0.910011	0.872932	0.922446	0.912481	0.855531	0.923973	0.924252	0.927559	0.921362	0.907567
cg22200611	AARD	N_Shore	TSS200	0.33717	0.406819	0.353613	0.433343	0.446237	0.561568	0.361972	0.3679	0.408578	0.605121	0.544729	0.418408	0.503706	0.445965	0.539689	0.438154	0.441882	0.492207
	AARD											0.659294									0.699887
cg03818826	AARS	S_Shore	TSS1500	0.0374884	0.0476243	0.0413733	0.044842	0.0591029	0.0491507	0.041349	0.0533977	0.046791	0.0934081	0.0529156	0.0609727	0.0548094	0.0512958	0.0354646	0.0352581	0.0495043	0.0542036
cg04424379	AARS	Island	TSS200	0.0142666	0.0158636	0.0144356	0.0143676	0.0154711	0.0113737	0.0133669	0.0136702	0.0141019	0.0204929	0.0150485	0.0157609	0.0168091	0.0189226	0.0124322	0.0092276	0.0145932	0.0154109
cg05523882	AARS	S_Shore	TSS1500	0.286843	0.166499	0.334802	0.200769	0.463969	0.159944	0.13932	0.270113	0.252782	0.413247	0.131915	0.217828	0.221794	0.292	0.214516	0.204633	0.239182	0.241889
cg06767762	AARS	Island	TSS200	0.0433564	0.0450793	0.0519042	0.0501554	0.0448536	0.0476622	0.0600567	0.0515662	0.0493293	0.0576227	0.0483685	0.0376643	0.0505862	0.0463789	0.0357445	0.0337798	0.0439229	0.0442585
cg06920390	AARS	Island	TSS200	0.037233	0.0406346	0.033058	0.0345548	0.0375294	0.03385	0.0327619	0.0323114	0.0352416	0.0736249	0.0390983	0.0328142	0.0408119	0.0564134	0.0270479	0.0240306	0.0356541	0.0411869
cg07837642	AARS	S_Shore	TSS200	0.0165142	0.0199925	0.0202056	0.0182148	0.0259464	0.0156939	0.0151507	0.0191838	0.0188627	0.0216447	0.0162787	0.0199331	0.0275257	0.0309554	0.0206711	0.0119324	0.0198881	0.0211036
cg08369870	AARS	Island	TSS200	0.0688516	0.0492787	0.0703267	0.0537613	0.0707142	0.0677097	0.0641471	0.0629003	0.0634612	0.0891171	0.0694687	0.0640659	0.0696997	0.0545137	0.0647623	0.056818	0.0556168	0.0655078
cg09102714	AARS	S_Shore	TSS1500	0.0227542	0.0259783	0.0287563	0.0242837	0.0296029	0.0227556	0.0277205	0.0259741	0.0259782	0.0458033	0.0230924	0.0272824	0.0277934	0.0316215	0.0245493	0.0199396	0.02436	0.0280552
cg21045174	AARS	S_Shore	TSS200;TSS200	0.0250653	0.0299279	0.0233856	0.0267846	0.0247503	0.0222291	0.022907	0.0188115	0.0242327	0.0348125	0.0164741	0.0230213	0.0302944	0.0356573	0.0270221	0.0263543	0.0218086	0.0269306
cg24115784	AARS	S_Shore	TSS200;TSS200	0.0253756	0.0232355	0.0243722	0.0293773	0.0307398	0.0265451	0.0200464	0.0203757	0.0250084	0.0356992	0.0195011	0.02175	0.0302542	0.033669	0.0281503	0.0176927	0.023866	0.0263228
cg26862620	AARS	Island	TSS200	0.0392317	0.0378613	0.0386174	0.0348044	0.0457773	0.0427443	0.0443331	0.0405409	0.0404888	0.0530026	0.0416333	0.045919	0.0647129	0.0384311	0.033658	0.0358394	0.0343095	0.0434382
	AARS											0.0542071									0.0553007
cg00910127	AARS2	S_Shore	TSS1500	0.388975	0.359548	0.405765	0.523655	0.33152	0.171899	0.349336	0.428527	0.369903	0.167184	0.145633	0.310814	0.294274	0.346064	0.267183	0.26063	0.396894	0.273584
cg01122755	AARS2	S_Shore	TSS200	0.0887074	0.0569425	0.0590274	0.0724652	0.0750768	0.0574573	0.0788904	0.051982	0.0675686	0.0915195	0.0428323	0.0643802	0.068565	0.0937284	0.054318	0.0539799	0.0546241	0.0654934
cg02118776	AARS2	S_Shore	TSS200	0.0282906	0.0288124	0.0318091	0.0351322	0.0326353	0.0244343	0.0285569	0.0273431	0.0296267	0.0221474	0.0308817	0.0307397	0.0305378	0.0378364	0.0270954	0.0212331	0.0309326	0.0289255
cg04911280	AARS2	Island	TSS200	0.0624267	0.0363718	0.0364842	0.0417352	0.0490149	0.0343017	0.039601	0.0382256	0.0422701	0.0251425	0.032119	0.0388051	0.0493327	0.0966639	0.0381265	0.0275929	0.0391103	0.0433616
cg05917988	AARS2	Island	TSS200	0.14212	0.12154	0.123971	0.138568	0.183744	0.0948094	0.153568	0.100738	0.132382	0.0924623	0.0703155	0.122347	0.144717	0.212253	0.0922748	0.101629	0.10437	0.117546
cg05920345	AARS2	S_Shore	TSS1500	0.935274	0.940055	0.916239	0.93315	0.930773	0.911799	0.931327	0.934426	0.92913	0.931567	0.906305	0.872942	0.8729	0.920033	0.81337	0.93655	0.925632	0.897412
cg07666271	AARS2	S_Shore	TSS1500	0.790021	0.923169	0.810425	0.857664	0.800904	0.811716	0.850783	0.782961	0.828455	0.61189	0.812466	0.739589	0.707934	0.792096	0.662294	0.676807	0.755898	0.719872
cg15447628	AARS2	S_Shore	TSS1500	0.766912	0.865467	0.710749	0.838133	0.855978	0.663212	0.815447	0.823356	0.792407	0.873005	0.580611	0.699387	0.695669	0.728186	0.510196	0.73251	0.794215	0.701722
cg19291355	AARS2	Island	TSS200	0.0375318	0.0314557	0.0300607	0.0473391	0.058392	0.0368227	0.0573741	0.0373275	0.0420379	0.0190687	0.0300446	0.0354604	0.0429286	0.152998	0.0562446	0.0264517	0.0396895	0.0503608
cg19940332	AARS2	Island	TSS200	0.0234136	0.024282	0.0230606	0.0259749	0.0239411	0.0221969	0.0193995	0.0246739	0.0233678	0.0176	0.0247606	0.0240185	0.0291729	0.0335466	0.0234076	0.021418	0.0227244	0.0245811
cg21389025	AARS2	Island	TSS200	0.0187614	0.0190541	0.0182712	0.0187542	0.0165125	0.0167892	0.0158198	0.0168855	0.017606	0.0143753	0.0184342	0.0166329	0.0167891	0.0193558	0.0178867	0.0128257	0.0183595	0.0168324
cg22760420	AARS2	S_Shore	TSS1500	0.789164	0.843398	0.751343	0.785343	0.814152	0.719464	0.728505	0.712547	0.767989	0.599136	0.780807	0.683008	0.772092	0.797668	0.661358	0.803726	0.776202	0.73425
	AARS2											0.336895									0.306162
cg00016255	AARSD1	S_Shore	TSS1500;TSS1500;Body;TSS1500	0.200714	0.257569	0.254033	0.268599	0.304412	0.115463	0.231162	0.174634	0.225823	0.0817899	0.11765	0.173912	0.10313	0.262376	0.177539	0.123857	0.199717	0.154996
cg04307927	AARSD1	Island	TSS1500;TSS1500;TSS1500;1stExon;TSS1500	0.0103697	0.0379137	0.00979487	0.0101612	0.0129607	0.00744954	0.012062	0.0102682	0.0138725	0.0348478	0.0110092	0.00958175	0.0312687	0.107075	0.0130953	0.00657848	0.0102806	0.0279671
cg10935720	AARSD1	Island	TSS200;TSS1500;TSS200;TSS200;1stExon	0.0241949	0.0245852	0.0234545	0.0272279	0.0280642	0.0266478	0.0233407	0.0283621	0.0257347	0.0247212	0.0278272	0.0257913	0.0243866	0.0281293	0.0241708	0.026407	0.0261229	0.0259445
cg12578182	AARSD1	Island	TSS200;TSS1500;TSS200;TSS200;1stExon	0.0318896	0.0296936	0.0294959	0.0292169	0.0300491	0.0325464	0.026616	0.0307878	0.0300369	0.0334155	0.0289764	0.0285868	0.0304409	0.0299208	0.0293453	0.0282565	0.0275338	0.0295595
cg17252669	AARSD1	Island	TSS1500;TSS1500;TSS1500;1stExon;TSS1500	0.0172165	0.0203055	0.0166577	0.0182177	0.0146328	0.0149973	0.0135599	0.0155383	0.0163907	0.0152688	0.0168719	0.0196281	0.0228368	0.0300859	0.0172619	0.0136367	0.0174152	0.0191257
cg18426444	AARSD1	Island	TSS200;TSS1500;TSS200;TSS200;1stExon	0.0370952	0.0308057	0.0324577	0.0355796	0.0384004	0.0386587	0.0337661	0.0327354	0.0349373	0.0387264	0.0303372	0.0307503	0.0339128	0.0384525	0.03058	0.0291475	0.0298741	0.0327226
cg22501899	AARSD1	Island	TSS1500;TSS1500;TSS1500;1stExon;TSS1500	0.0473976	0.0393752	0.0344096	0.0435292	0.0491569	0.0404473	0.0406057	0.0378974	0.0416024	0.0425141	0.0365819	0.0394488	0.0411096	0.0443071	0.0499627	0.0398154	0.037772	0.041439
cg23649161	AARSD1	Island	TSS200;TSS1500;TSS200;TSS200;1stExon	0.0610183	0.038442	0.0457033	0.0447072	0.0485105	0.054859	0.045091	0.0387838	0.0471394	0.0472446	0.041504	0.0433138	0.0525076	0.053213	0.0456259	0.0442952	0.042433	0.0462671
	AARSD1											0.0544421									0.0472527
cg00713969	AASDH	S_Shore	TSS1500;TSS1500;TSS1500;TSS1500;TSS1500;TSS1500	0.0346707	0.030821	0.0347285	0.0317515	0.0317116	0.025609	0.0329768	0.0274418	0.0312139	0.0359442	0.0300234	0.0334093	0.0328163	0.0507162	0.031551	0.0212236	0.0275459	0.0329037
cg03289369	AASDH	S_Shore	TSS200	0.0223438	0.0207943	0.0158897	0.0225163	0.0209219	0.0191977	0.0170822	0.0182138	0.01962	0.0189476	0.0164839	0.0177787	0.0185504	0.029732	0.016287	0.0139249	0.0177355	0.01868
cg04573661	AASDH	S_Shore	TSS1500	0.508377	0.404951	0.566457	0.553188	0.355633	0.351912	0.515716	0.51219	0.471053	0.481707	0.318496	0.47251	0.426898	0.462935	0.382199	0.522039	0.302812	0.421199
cg08415281	AASDH	Island	TSS200	0.0341716	0.0427765	0.0378947	0.0414014	0.0314543	0.0288342	0.030562	0.0267768	0.0342339	0.0816482	0.0230495	0.0271261	0.0431275	0.0473995	0.0373517	0.0257312	0.0324948	0.0397411
cg08423350	AASDH	Island	TSS200	0.0155085	0.015736	0.0139368	0.0165463	0.0161201	0.0134336	0.0190751	0.0166838	0.01588	0.012301	0.0152117	0.0150169	0.0377003	0.0287498	0.0147437	0.0119212	0.0137284	0.0186716
cg08497199	AASDH	Island	TSS200	0.0306705	0.0352821	0.0344714	0.0435907	0.0367481	0.0322502	0.0338836	0.0296296	0.0345658	0.0379689	0.0403945	0.0329361	0.0586601	0.0602313	0.03807	0.0259014	0.0334943	0.0409571
cg09999563	AASDH	Island	TSS200	0.011854	0.0209407	0.0116786	0.0181878	0.0155886	0.0123064	0.0132391	0.0144227	0.0147772	0.0234047	0.0123924	0.0131721	0.0422225	0.0417561	0.0112872	0.00927208	0.0126017	0.0207636
cg12283482	AASDH	S_Shore	TSS1500	0.267232	0.4372	0.422532	0.372977	0.214638	0.232893	0.579054	0.232951	0.344935	0.234637	0.117517	0.244541	0.26415	0.345099	0.16189	0.374155	0.167032	0.238628
cg13202162	AASDH	S_Shore	TSS200;TSS200;TSS200;TSS200;TSS200;TSS200	0.0213794	0.0203237	0.0202327	0.0202866	0.0209694	0.0202521	0.0224668	0.0153177	0.0201535	0.0319187	0.0181823	0.0195686	0.0283393	0.0351225	0.0227813	0.0159343	0.0205141	0.0240451
cg13939352	AASDH	Island	TSS200	0.0298313	0.0309992	0.0313447	0.0398589	0.0217199	0.0287795	0.0290321	0.0208001	0.0290457	0.0294096	0.0249656	0.0288887	0.0599433	0.05844	0.0389637	0.0159824	0.0237629	0.0350445
cg17778640	AASDH	S_Shore	TSS1500;TSS1500;TSS1500;TSS1500;TSS1500;TSS1500	0.0991053	0.104588	0.154889	0.165674	0.0970894	0.12073	0.192558	0.0836056	0.12728	0.109164	0.121575	0.117145	0.107076	0.14009	0.0693064	0.13313	0.0642949	0.107723
	AASDH											0.103887									0.0907597
cg02453779	AASDHPPT	Island	1stExon;TSS200;TSS200	0.156464	0.116384	0.0898005	0.150025	0.12041	0.12566	0.114177	0.108993	0.122739	0.0822518	0.0951148	0.126218	0.136843	0.212236	0.118162	0.111261	0.125076	0.125895
cg08268160	AASDHPPT	Island	1stExon;TSS200;TSS200	0.0195652	0.0197871	0.0161028	0.0171017	0.0142142	0.0180258	0.0198101	0.0157436	0.0175438	0.025948	0.0176614	0.018224	0.0176473	0.0267094	0.0154682	0.0125792	0.0157736	0.0187514
cg09213347	AASDHPPT	Island	1stExon;TSS200;TSS200	0.0124349	0.0179039	0.0116883	0.0143082	0.0144106	0.0106101	0.0105237	0.01267	0.0130687	0.0201495	0.0128087	0.010822	0.0205501	0.0229544	0.0136579	0.0106108	0.0122222	0.015472
cg16086925	AASDHPPT	Island	1stExon;TSS200;TSS200	0.0527807	0.0391901	0.0315938	0.0405689	0.0482226	0.0248194	0.0407751	0.0251564	0.0378884	0.0901263	0.0198767	0.0337493	0.0964688	0.0786015	0.0300403	0.017403	0.0242965	0.0488203
cg16737213	AASDHPPT	Island	1stExon;TSS200;TSS200	0.0333036	0.0422348	0.0440506	0.0399382	0.0294161	0.0311351	0.0361477	0.0337757	0.0362502	0.0387764	0.0344713	0.0301409	0.0841261	0.0581584	0.0375793	0.0264054	0.0423936	0.0440064
cg24931592	AASDHPPT	Island	1stExon;TSS200;TSS200	0.0784716	0.0672275	0.056691	0.0578398	0.0660551	0.0661969	0.0874842	0.0489697	0.066117	0.11653	0.0443358	0.0602549	0.101736	0.120463	0.0614111	0.0771828	0.0609172	0.0803539
	AASDHPPT											0.0489345									0.0555499
cg00600521	AASS	S_Shore	TSS1500	0.868277	0.920547	0.836992	0.893694	0.906847	0.843527	0.890448	0.904543	0.883109	0.750637	0.890947	0.859389	0.901308	0.874993	0.820676	0.913379	0.882051	0.861672
cg08105781	AASS	Island	TSS200	0.034661	0.0321002	0.0347583	0.0429529	0.0378765	0.0280167	0.0284678	0.0355593	0.0342991	0.0290231	0.0244098	0.0332288	0.0397103	0.0413117	0.0270535	0.0224164	0.0354726	0.0315783
cg08701264	AASS	S_Shore	TSS1500	0.109471	0.067311	0.0918986	0.135986	0.106821	0.0458906	0.0894251	0.0664288	0.089154	0.0774384	0.104496	0.0437013	0.124717	0.14436	0.0706566	0.0678701	0.0502199	0.0854324
cg17174775	AASS	Island	TSS1500	0.0286266	0.0462295	0.0367276	0.0513558	0.0271938	0.0570613	0.0461001	0.0130667	0.0382952	0.0440132	0.0472856	0.0362849	0.0399571	0.0461364	0.0378258	0.049412	0.0355075	0.0420528
cg17200919	AASS	Island	TSS1500	0.0395645	0.0483182	0.0507214	0.0831063	0.0530786	0.0343989	0.0627978	0.0379888	0.0512468	0.0529946	0.0281399	0.0472217	0.039606	0.064738	0.0485252	0.0300299	0.036152	0.0434259
cg18057762	AASS	Island	TSS1500	0.0507766	0.0424959	0.0496177	0.0558509	0.0569728	0.0383777	0.0423002	0.0510283	0.0484275	0.0406753	0.0411942	0.0476312	0.04515	0.0600182	0.040906	0.0345167	0.0375197	0.0434514
cg22684968	AASS	Island	TSS200	0.0705292	0.0329253	0.0379314	0.0538907	0.0500711	0.0332118	0.036965	0.0295589	0.0431354	0.0385579	0.0283856	0.0286066	0.0324615	0.0466416	0.0343543	0.0277753	0.0279074	0.0330863
cg24133836	AASS	Island	TSS200	0.0281834	0.0277723	0.0254662	0.0368967	0.0226178	0.0199595	0.0170331	0.0240066	0.0252419	0.018661	0.0286736	0.0267581	0.0243056	0.0337797	0.0218712	0.0188272	0.0253022	0.0247723
cg25741731	AASS	Island	TSS200	0.0259506	0.029827	0.0314035	0.0434627	0.0547823	0.0290005	0.0271858	0.0271117	0.0335905	0.027444	0.0319597	0.0336233	0.0271339	0.042757	0.0283731	0.0442361	0.0406455	0.0345216
	AASS											0.1385									0.133333
cg03252536	AATF	Island	TSS200	0.0232687	0.0441549	0.0143218	0.0188539	0.0115898	0.0105505	0.0141727	0.0125327	0.0186806	0.0404642	0.012191	0.0128986	0.0275191	0.087682	0.0151074	0.0109208	0.0186946	0.0281847
cg05012946	AATF	N_Shore	TSS1500	0.0412585	0.0481768	0.0409837	0.0433383	0.0725764	0.0350909	0.0367318	0.0340234	0.0440225	0.0389392	0.0441754	0.0374173	0.0456671	0.0432414	0.0443095	0.0396395	0.03067	0.0405074
cg06385152	AATF	Island	TSS200	0.0619486	0.107991	0.0640854	0.0831262	0.0832729	0.068569	0.0912377	0.0519309	0.0765202	0.131393	0.0514888	0.0678154	0.133182	0.154555	0.0684497	0.0795543	0.0566678	0.0928882
cg06929230	AATF	Island	TSS1500	0.0306724	0.0457628	0.0557589	0.0654563	0.0382639	0.0223374	0.0316376	0.0345018	0.0405489	0.0301259	0.0301356	0.0365655	0.0281343	0.0500066	0.0524962	0.015565	0.0380718	0.0351376
cg06971602	AATF	Island	TSS200	0.0166078	0.0176843	0.0171899	0.02124	0.0188299	0.0153686	0.0179399	0.0168597	0.017715	0.0318828	0.0165801	0.0155222	0.0527721	0.0277913	0.0204285	0.01302	0.0157486	0.0242182
cg11262262	AATF	N_Shore	TSS1500	0.142935	0.257509	0.199918	0.21974	0.303285	0.105081	0.206566	0.19536	0.203799	0.235428	0.274333	0.202685	0.0896225	0.164291	0.167593	0.173476	0.150885	0.182289
cg11857445	AATF	Island	TSS1500	0.103168	0.0603513	0.0875818	0.0938628	0.0836897	0.0662195	0.0698371	0.0494216	0.0767665	0.0831688	0.0438394	0.0791194	0.0954888	0.0876133	0.0757436	0.0665268	0.0586774	0.0737722
cg12740148	AATF	Island	TSS200	0.0244437	0.0238913	0.0260618	0.0264796	0.0230578	0.0222487	0.0204927	0.0240548	0.0238413	0.0178271	0.0259584	0.025901	0.0285023	0.0302363	0.0235423	0.0219329	0.0257193	0.0249524
cg14974722	AATF	Island	TSS200	0.0440072	0.100668	0.0528204	0.0695826	0.0691898	0.0417423	0.0841368	0.0477747	0.0637402	0.215149	0.0521188	0.0539664	0.14343	0.181764	0.058467	0.0562049	0.0640654	0.103146
cg26354180	AATF	N_Shore	TSS1500	0.217152	0.135109	0.189436	0.258698	0.218888	0.12718	0.185989	0.178337	0.188849	0.250868	0.274013	0.217456	0.230921	0.208561	0.18349	0.225705	0.173408	0.220553
	AATF											0.0754483									0.0825648
cg02564313	ABAT	N_Shore	TSS1500	0.855639	0.816309	0.743873	0.834081	0.822508	0.832157	0.876894	0.85703	0.829811	0.864981	0.879316	0.806143	0.827596	0.851767	0.804941	0.864942	0.849353	0.84363
cg03698956	ABAT	N_Shore	TSS1500	0.114621	0.0402402	0.119521	0.0739598	0.086431	0.0570398	0.0744361	0.0549039	0.0776441	0.132388	0.04519	0.0842492	0.0896759	0.103704	0.0717587	0.0585366	0.0793728	0.0831094
cg16704802	ABAT	Island	TSS200	0.0260797	0.0241577	0.0211978	0.0225277	0.0299401	0.0221967	0.0209185	0.0228748	0.0237366	0.0162826	0.0262586	0.0246743	0.0213615	0.0272546	0.0246992	0.0221022	0.0225678	0.0231501
cg19016494	ABAT	Island	TSS200	0.0549417	0.0366851	0.031372	0.0451339	0.0539565	0.0467306	0.033748	0.039509	0.0427596	0.046532	0.0478574	0.0305759	0.0374842	0.0603097	0.0307741	0.0326295	0.035097	0.0401575
cg20587543	ABAT	N_Shore	TSS1500	0.0623973	0.0366379	0.0428688	0.0549509	0.0505877	0.0416783	0.054459	0.0280863	0.0464583	0.0578643	0.0284562	0.0476402	0.0603656	0.0489159	0.047637	0.0430511	0.0362286	0.0462699
cg21094410	ABAT	Island	TSS200	0.0149761	0.0143087	0.0137796	0.0157638	0.0159085	0.0122815	0.0113069	0.014577	0.0141128	0.0151832	0.0160412	0.0150889	0.0152006	0.0212975	0.0109743	0.0107552	0.0144055	0.0148683
cg22926093	ABAT	Island	TSS200	0.00899289	0.0131842	0.0140642	0.0134772	0.011186	0.0107445	0.00897207	0.0113198	0.0114926	0.0127121	0.013221	0.0157002	0.0116137	0.017171	0.0127389	0.00777988	0.0124606	0.0129247
cg25025609	ABAT	Island	TSS200	0.0223788	0.0201113	0.0229257	0.0241068	0.0199031	0.0221762	0.0181086	0.0212596	0.0213713	0.0149243	0.0233522	0.0230441	0.0194668	0.0285966	0.0235363	0.0168877	0.0208357	0.0213305
	ABAT											0.133423									0.13568
cg00822110	ABCA1	Island	TSS200	0.0592527	0.0310245	0.0500103	0.0719694	0.0506792	0.0385082	0.0355091	0.0412849	0.0472798	0.0822603	0.0278051	0.0477106	0.209081	0.0833907	0.144099	0.0328576	0.0514346	0.0848299
cg05286874	ABCA1	Island	TSS200	0.0297291	0.028843	0.0335821	0.0443643	0.0397885	0.0255135	0.0233582	0.0204642	0.0307054	0.0968061	0.0188834	0.029018	0.245938	0.0687226	0.13932	0.0214676	0.0275751	0.0809663
cg10775893	ABCA1	Island	TSS200	0.0343269	0.0294305	0.0221673	0.0331333	0.0283052	0.0195852	0.0248773	0.0220965	0.0267403	0.0398214	0.0221058	0.0347794	0.128013	0.0382823	0.0733553	0.0253327	0.0311567	0.0491058
cg11504635	ABCA1	Island	TSS200	0.0259449	0.0275463	0.0281694	0.035822	0.0341944	0.0225483	0.0275968	0.0267261	0.0285685	0.03331	0.0253277	0.0258864	0.103829	0.0513595	0.0577167	0.0304282	0.021562	0.0436774
cg12552394	ABCA1	Island	TSS200	0.0575708	0.0508345	0.0406923	0.0627339	0.0728345	0.0315386	0.033889	0.0440095	0.0492629	0.0864265	0.0423568	0.0459108	0.198057	0.0981276	0.199559	0.0306028	0.0516243	0.0940831
cg13430450	ABCA1	S_Shore	TSS1500	0.892697	0.8464	0.842083	0.882783	0.882037	0.877327	0.888	0.890213	0.875193	0.896353	0.8803	0.870986	0.88427	0.883162	0.877224	0.87608	0.877151	0.880691
cg13744677	ABCA1	S_Shore	TSS1500	0.177968	0.483233	0.334218	0.357311	0.392984	0.565662	0.232259	0.394761	0.3673	0.535604	0.462892	0.367581	0.29834	0.278992	0.52299	0.413419	0.270655	0.393809
cg14019050	ABCA1	Island	TSS1500	0.504188	0.621896	0.580814	0.589132	0.590921	0.608834	0.473593	0.621929	0.573913	0.537675	0.588998	0.526205	0.523289	0.485664	0.627822	0.572526	0.551089	0.551658
cg14863387	ABCA1	S_Shore	TSS1500	0.691182	0.719247	0.635694	0.718638	0.70654	0.713975	0.685415	0.688406	0.694887	0.65032	0.690019	0.713819	0.657827	0.783353	0.699246	0.717303	0.700206	0.701512
	ABCA1											0.299317									0.320037
cg10853085	ABCA12		TSS1500;TSS1500	0.899343	0.926997	0.81423	0.874315	0.879908	0.920712	0.88828	0.881997	0.885723	0.878586	0.910029	0.90069	0.877056	0.884149	0.871531	0.92433	0.887143	0.891689
cg13236377	ABCA12		TSS1500;TSS1500	0.931561	0.935397	0.923449	0.938507	0.926004	0.937623	0.937871	0.933284	0.932962	0.949741	0.942718	0.933962	0.946529	0.936696	0.919996	0.942109	0.936733	0.938561
cg17546605	ABCA12		TSS200;TSS200	0.744254	0.738616	0.732964	0.734952	0.808229	0.8265	0.731394	0.653074	0.746248	0.742552	0.801542	0.753936	0.645861	0.797525	0.796979	0.838368	0.75807	0.766854
cg23801991	ABCA12		TSS1500;TSS1500	0.610417	0.638879	0.572909	0.63694	0.668918	0.794025	0.675024	0.561298	0.644801	0.715515	0.783686	0.604451	0.530334	0.663406	0.579498	0.613254	0.67001	0.645019
cg24116875	ABCA12		TSS1500;TSS1500	0.870702	0.909065	0.851284	0.888538	0.888662	0.916363	0.892279	0.860501	0.884674	0.893038	0.883779	0.885698	0.890489	0.891398	0.892713	0.930614	0.890661	0.894799
	ABCA12											0.818882									0.827384
cg21852712	ABCA17P	Island	TSS200;TSS200	0.0138278	0.0161582	0.0110143	0.0147747	0.0123339	0.00985017	0.0120082	0.011679	0.0127058	0.0134924	0.0110144	0.0104384	0.0225396	0.0486484	0.0122755	0.00843523	0.0164447	0.0179111
cg25164336	ABCA17P	Island	TSS200;TSS200	0.0379317	0.0239002	0.0187003	0.0315345	0.0192136	0.0170191	0.0150307	0.0164784	0.0224761	0.0166966	0.0183851	0.0207015	0.0254596	0.0465343	0.0190768	0.0120008	0.0185321	0.0221734
	ABCA17P											0.0175909									0.0200422
cg03110772	ABCA4		TSS200	0.895351	0.912244	0.831996	0.906234	0.854848	0.909572	0.888328	0.889344	0.88599	0.93125	0.918553	0.905517	0.911538	0.876552	0.858275	0.912917	0.894274	0.90111
cg06895831	ABCA4		TSS1500	0.919137	0.916045	0.874827	0.928711	0.892551	0.948012	0.933071	0.881414	0.911721	0.941481	0.922964	0.924464	0.943909	0.910684	0.898143	0.930382	0.910815	0.922855
cg09360041	ABCA4		TSS1500	0.860117	0.883815	0.707164	0.79901	0.836303	0.858852	0.822089	0.820485	0.823479	0.830719	0.857022	0.756349	0.847718	0.852	0.60648	0.833619	0.8612	0.805638
cg12869058	ABCA4		TSS1500	0.831296	0.890806	0.702045	0.830967	0.826352	0.888208	0.859857	0.820015	0.831193	0.346384	0.916506	0.802669	0.862078	0.816741	0.715724	0.903223	0.84929	0.776577
cg16298016	ABCA4		TSS1500	0.922922	0.937059	0.910682	0.927446	0.908749	0.943298	0.940978	0.9339	0.928129	0.928227	0.941887	0.924492	0.929426	0.915663	0.901739	0.943625	0.940852	0.928239
	ABCA4											0.876103									0.866884
cg00803816	ABCA5	Island	TSS1500	0.0701925	0.0481098	0.0479242	0.0403836	0.0549612	0.0556391	0.0826601	0.0366753	0.0545682	0.293703	0.107117	0.0376704	0.216949	0.0566241	0.0486154	0.0523642	0.0426678	0.106964
cg05237828	ABCA5	S_Shore	TSS1500	0.0412309	0.0569617	0.0656301	0.055058	0.0516497	0.0984062	0.0437346	0.0946453	0.0634146	0.568789	0.199694	0.0440512	0.236371	0.0876824	0.0600442	0.0516463	0.0436722	0.161494
cg06409153	ABCA5	S_Shore	TSS1500	0.176827	0.161912	0.158602	0.159272	0.170135	0.252846	0.0908509	0.203802	0.171781	0.680107	0.374605	0.086733	0.421874	0.19075	0.0991963	0.115933	0.0974772	0.258334
cg08197943	ABCA5	Island	TSS1500	0.0300497	0.0271709	0.0261278	0.0328322	0.0254433	0.0267226	0.0281306	0.0264416	0.0278648	0.0884996	0.0259665	0.0263715	0.0313226	0.0392474	0.0310254	0.0191873	0.0275172	0.0361422
cg10187674	ABCA5	S_Shore	TSS1500	0.14656	0.148827	0.169363	0.170305	0.178034	0.304993	0.110009	0.212107	0.180025	0.634194	0.36789	0.0990386	0.40825	0.177645	0.155921	0.0978286	0.148219	0.261123
cg25385760	ABCA5	Island	TSS200	0.0135755	0.0155403	0.0130618	0.0125664	0.0125605	0.0134841	0.0118311	0.0126326	0.0131565	0.0126064	0.0129044	0.0121744	0.0134118	0.0244112	0.0188421	0.00972799	0.0109985	0.0143846
	ABCA5											0.085135									0.13974
cg04380955	ABCA6		TSS1500	0.389885	0.625295	0.655302	0.61725	0.659748	0.795814	0.715759	0.599695	0.632343	0.727645	0.650482	0.59744	0.612247	0.528669	0.399244	0.516531	0.655517	0.585972
cg06815731	ABCA6		TSS1500	0.338473	0.591684	0.420505	0.483401	0.488308	0.462857	0.429111	0.466058	0.46005	0.539034	0.477559	0.331275	0.458317	0.490288	0.312282	0.380068	0.503748	0.436571
cg09286940	ABCA6		TSS1500	0.652522	0.766866	0.674726	0.74302	0.744707	0.721137	0.696506	0.654339	0.706728	0.689792	0.732234	0.631851	0.670025	0.666029	0.466774	0.661916	0.622654	0.642659
cg15341808	ABCA6		TSS200	0.502869	0.475553	0.629913	0.515622	0.65337	0.396206	0.365236	0.424862	0.495454	0.324055	0.313142	0.285146	0.307465	0.39159	0.28061	0.310777	0.319203	0.316499
cg22557012	ABCA6		TSS1500	0.344307	0.440668	0.449479	0.380271	0.307753	0.587351	0.448629	0.436724	0.424398	0.429559	0.504442	0.358213	0.41096	0.423688	0.326066	0.347824	0.45275	0.406688
cg24086348	ABCA6		TSS200	0.23223	0.302637	0.475332	0.363078	0.326302	0.315397	0.370421	0.35561	0.342626	0.429942	0.223415	0.253186	0.413255	0.2853	0.337664	0.317991	0.260507	0.315157
	ABCA6											0.510266									0.450591
cg05504606	ABCA7	Island	TSS1500	0.0820848	0.056682	0.0440904	0.0458202	0.047958	0.05157	0.0376709	0.0339531	0.0499787	0.111134	0.0290595	0.0379851	0.0962641	0.0725349	0.032005	0.0495004	0.0305164	0.0573749
cg06730721	ABCA7	Island	TSS1500	0.0386752	0.0280799	0.036122	0.0371201	0.0293993	0.0325634	0.0358293	0.027977	0.0332208	0.0622201	0.0233782	0.0271836	0.0291154	0.0411837	0.0287434	0.0244196	0.0243673	0.0325764
cg07325521	ABCA7	Island	TSS200	0.0163186	0.0176225	0.0211187	0.0192259	0.0176988	0.0191146	0.0141084	0.0177991	0.0178758	0.015903	0.0188121	0.0198862	0.0202731	0.0240593	0.0182274	0.0154172	0.0189156	0.0189367
cg07726048	ABCA7	Island	TSS200	0.0329755	0.0310734	0.0231616	0.0295681	0.0261071	0.0491906	0.0296688	0.0205823	0.0302909	0.0680811	0.019928	0.0253063	0.0614363	0.0499364	0.0251514	0.0179426	0.0208727	0.0360818
cg17677653	ABCA7	N_Shore	TSS1500	0.116046	0.0844676	0.139244	0.112842	0.142687	0.110348	0.133035	0.0922563	0.116366	0.102564	0.0762203	0.0974885	0.105245	0.153842	0.109179	0.0820404	0.113389	0.104996
cg21590311	ABCA7	Island	TSS200	0.0466073	0.026882	0.0313415	0.03794	0.0288288	0.024403	0.0269787	0.027741	0.0313403	0.0510631	0.0250435	0.033665	0.0389385	0.059108	0.0322864	0.0222987	0.0272044	0.036201
cg26263477	ABCA7	Island	TSS1500	0.0660041	0.0622775	0.0638714	0.0709123	0.0609988	0.0615558	0.0764169	0.0519534	0.0642488	0.139104	0.0584627	0.0626877	0.110239	0.113295	0.0591162	0.0721872	0.045872	0.0826205
cg26264438	ABCA7	Island	TSS200	0.00799162	0.0111894	0.00943462	0.0110243	0.00948703	0.0102275	0.00811239	0.00984824	0.00966439	0.0129271	0.00959599	0.00865905	0.0139644	0.0196449	0.0100784	0.00636894	0.00835551	0.0111993
	ABCA7											0.0441232									0.0474983
cg14416443	ABCA8		TSS1500;TSS1500;TSS1500	0.626365	0.684953	0.683489	0.607648	0.722464	0.446249	0.754047	0.612012	0.642153	0.299367	0.658151	0.392437	0.519231	0.491488	0.423487	0.495831	0.693326	0.496665
cg22107525	ABCA8		TSS200;TSS200;TSS200	0.500043	0.632717	0.641497	0.57833	0.611715	0.307213	0.369369	0.516122	0.519626	0.346469	0.440145	0.316099	0.207916	0.404698	0.410469	0.390483	0.404105	0.365048
cg27464144	ABCA8		TSS200	0.389194	0.36349	0.493948	0.412816	0.380045	0.228389	0.394086	0.331972	0.374243	0.18042	0.332186	0.189388	0.206696	0.304745	0.345364	0.340162	0.31104	0.27625
	ABCA8											0.512007									0.379321
cg01517431	ABCA9		TSS1500	0.732061	0.615396	0.666901	0.855525	0.808226	0.859092	0.684189	0.674536	0.736991	0.846368	0.851268	0.773691	0.74866	0.714181	0.525028	0.861842	0.738095	0.757392
cg03578022	ABCA9		TSS1500	0.469093	0.691266	0.617791	0.68109	0.97901	0.63533	0.839312	0.613083	0.690747	0.72863	0.625123	0.488841	0.593559	0.661447	0.720335	0.566995	0.642701	0.628454
cg05732683	ABCA9		TSS1500	0.477432	0.61353	0.551199	0.601177	0.627003	0.668312	0.518692	0.571067	0.578551	0.52169	0.586586	0.469525	0.423284	0.652645	0.911232	0.675482	0.594186	0.604329
cg06213598	ABCA9		TSS1500	0.821445	0.889475	0.850836	0.864017	0.874352	0.844783	0.78644	0.849064	0.847551	0.943805	0.8213	0.739619	0.816147	0.85248	0.73667	0.822038	0.865699	0.82472
cg09648092	ABCA9		TSS1500	0.376259	0.397084	0.427147	0.399703	0.382291	0.411351	0.374365	0.311955	0.385019	0.486906	0.367447	0.352295	0.375317	0.337166	0.293724	0.445881	0.443637	0.387797
cg22093121	ABCA9		TSS200	0.119082	0.124597	0.1564	0.150895	0.169794	0.296302	0.120517	0.191577	0.166146	0.242036	0.308998	0.149335	0.198994	0.14559	0.145457	0.178646	0.163451	0.191563
	ABCA9											0.567501									0.565709
cg15446670	ABCB1	Island	5'UTR;TSS200;TSS200;TSS200	0.0701573	0.0604696	0.0844533	0.0831788	0.084925	0.0759914	0.16302	0.0568574	0.0848816	0.055145	0.0675999	0.0664339	0.162568	0.0748426	0.0879688	0.0592693	0.0695109	0.0804173
cg17960051	ABCB1	Island	5'UTR;TSS200;TSS200;TSS200	0.0155869	0.0212118	0.0220836	0.017315	0.0179346	0.017147	0.0159353	0.0153543	0.0178211	0.0130495	0.0136574	0.0152633	0.0139775	0.0144266	0.0160815	0.0100335	0.00771708	0.0130258
cg18542829	ABCB1	Island	5'UTR;TSS200;TSS200;TSS200	0.0256054	0.0268141	0.0358599	0.0274121	0.0299751	0.0263565	0.0239133	0.0267051	0.0278302	0.0195301	0.0264226	0.0276102	0.0289423	0.0353394	0.028732	0.021593	0.0248579	0.0266284
	ABCB1											0.0435109									0.0400238
cg01460479	ABCB10	S_Shore	TSS1500	0.115271	0.0921203	0.0800465	0.112675	0.0961201	0.0774548	0.098079	0.0520024	0.0904711	0.157335	0.0528988	0.0842715	0.136088	0.140158	0.0827813	0.0803006	0.0820678	0.101988
cg01582104	ABCB10	Island	TSS200	0.0107777	0.0196063	0.0139437	0.0160105	0.0148519	0.0145362	0.0117707	0.0138821	0.0144224	0.0151302	0.0122119	0.01237	0.0138092	0.0213152	0.0126593	0.0128795	0.0139643	0.0142924
cg07195660	ABCB10	Island	TSS200	0.0294879	0.0603917	0.0274829	0.0444214	0.0278132	0.0326751	0.0323543	0.024848	0.0349343	0.0467604	0.0231881	0.0223495	0.0585645	0.0531115	0.0325659	0.0207337	0.0343224	0.0364495
cg10478231	ABCB10	S_Shore	TSS1500	0.416825	0.487821	0.462041	0.48408	0.432044	0.211178	0.390371	0.415436	0.412475	0.290477	0.241663	0.215644	0.237192	0.474006	0.195193	0.249965	0.367944	0.28401
cg11438161	ABCB10	Island	TSS200	0.0233793	0.0280751	0.027121	0.0201395	0.0187806	0.0199603	0.0255057	0.0147732	0.0222168	0.0139401	0.020221	0.0185371	0.0326403	0.0364523	0.0175159	0.0117011	0.0183771	0.0211731
cg11789864	ABCB10	Island	TSS1500	0.0165572	0.0388081	0.0165547	0.0220447	0.0180901	0.0169852	0.0136743	0.0159704	0.0198356	0.0296015	0.0176634	0.0175488	0.0299435	0.0456685	0.0200242	0.0111344	0.0162892	0.0234842
cg15632839	ABCB10	Island	TSS1500	0.0251889	0.0332107	0.0282456	0.0287719	0.0315289	0.0312572	0.0459628	0.0313759	0.0319427	0.0430232	0.029105	0.0291251	0.0269905	0.0489034	0.0322253	0.0305902	0.0284178	0.0335476
cg18313106	ABCB10	Island	TSS200	0.190134	0.164803	0.194506	0.208128	0.155675	0.116649	0.15748	0.100188	0.160945	0.145801	0.144668	0.17763	0.167664	0.246453	0.175598	0.120823	0.12587	0.163063
	ABCB10											0.0984054									0.084751
cg12955870	ABCB11		TSS200	0.730543	0.728153	0.652027	0.748481	0.78231	0.842758	0.618087	0.741792	0.730519	0.790558	0.831326	0.751277	0.8394	0.653145	0.716478	0.791111	0.71936	0.761582
cg21346679	ABCB11		TSS1500	0.831304	0.794372	0.781019	0.847367	0.807533	0.85925	0.777781	0.781053	0.80996	0.673523	0.762887	0.712172	0.745899	0.827469	0.70152	0.788876	0.837942	0.756286
	ABCB11											0.770239									0.758934
cg00689775	ABCB4	S_Shore	TSS1500;TSS1500;TSS1500	0.937811	0.953185	0.907902	0.910028	0.930356	0.936622	0.945231	0.949262	0.9338	0.933318	0.948322	0.930092	0.936917	0.933912	0.894884	0.942378	0.944459	0.933035
cg04438814	ABCB4	Island	TSS200;TSS200;TSS200	0.0193826	0.029682	0.0321274	0.0402121	0.0641106	0.476752	0.0226566	0.0219022	0.0883532	0.138647	0.395927	0.332491	0.0650186	0.105975	0.385602	0.471718	0.0230829	0.239808
cg04996195	ABCB4	S_Shore	TSS1500;TSS1500;TSS1500	0.287806	0.240391	0.162609	0.340682	0.330634	0.533815	0.164169	0.226113	0.285777	0.385373	0.348327	0.225812	0.409256	0.21733	0.542837	0.317029	0.196772	0.330342
cg14785615	ABCB4	Island	TSS1500;TSS1500;TSS1500	0.055974	0.0264425	0.0160141	0.0574484	0.0395907	0.460464	0.0184572	0.0302633	0.0880818	0.039406	0.393151	0.174704	0.0186753	0.0585512	0.0972009	0.365459	0.0182147	0.14567
cg19041648	ABCB4	Island	TSS200;TSS200;TSS200	0.0398279	0.0315617	0.0289353	0.0441421	0.0392307	0.515844	0.0253596	0.0343393	0.0949051	0.0336261	0.32413	0.0746743	0.029309	0.0467513	0.0598914	0.0801645	0.0285113	0.0846322
cg23839575	ABCB4	S_Shore	TSS1500;TSS1500;TSS1500	0.758767	0.83394	0.672574	0.746103	0.744404	0.884462	0.819983	0.750802	0.776379	0.884507	0.827225	0.723403	0.841404	0.785597	0.691631	0.76955	0.775702	0.787377
cg25823085	ABCB4	S_Shore	TSS1500;TSS1500;TSS1500	0.359851	0.39321	0.291754	0.417221	0.38471	0.60304	0.26785	0.256878	0.371814	0.480801	0.39306	0.415132	0.495593	0.357219	0.487103	0.416289	0.326034	0.421404
cg25952573	ABCB4	Island	TSS1500;TSS1500;TSS1500	0.0836485	0.103224	0.0445035	0.123367	0.0837275	0.448309	0.0729758	0.104772	0.133066	0.0865949	0.369405	0.181088	0.0810254	0.178691	0.113836	0.315386	0.0392633	0.170661
	ABCB4											0.346522									0.389116
cg02470904	ABCB5		Body;TSS1500;TSS1500;TSS1500	0.77678	0.748075	0.745724	0.85124	0.81544	0.878979	0.758275	0.807061	0.797697	0.748571	0.795198	0.761046	0.827783	0.795799	0.881117	0.853273	0.842609	0.813175
cg03770549	ABCB5		TSS1500	0.760198	0.844531	0.805742	0.836917	0.839496	0.822481	0.750951	0.785811	0.805766	0.7592	0.798167	0.756265	0.815001	0.804659	0.817542	0.769737	0.81918	0.792469
cg06281721	ABCB5		TSS1500;TSS1500;TSS1500;Body	0.717821	0.761055	0.629407	0.732332	0.741837	0.777631	0.683578	0.594504	0.704771	0.752796	0.706142	0.692773	0.683497	0.664042	0.732258	0.778586	0.647021	0.707139
cg08486595	ABCB5		TSS1500;TSS1500;TSS1500;Body	0.842282	0.870125	0.842953	0.87505	0.873066	0.877481	0.842734	0.831568	0.856907	0.870305	0.845753	0.804463	0.829156	0.888346	0.878634	0.886182	0.866028	0.858608
cg08888968	ABCB5		TSS1500	0.811467	0.845586	0.843338	0.863586	0.850455	0.857815	0.855032	0.836263	0.845443	0.894409	0.833486	0.743197	0.866762	0.84616	0.837841	0.877033	0.852544	0.843929
cg09307830	ABCB5		TSS200	0.891231	0.898731	0.843323	0.881213	0.881578	0.921152	0.91069	0.896979	0.890612	0.842095	0.921942	0.875108	0.887191	0.874355	0.84796	0.911267	0.916547	0.884558
cg14878128	ABCB5		TSS200	0.77912	0.813816	0.757524	0.763158	0.684825	0.763196	0.304699	0.730764	0.699638	0.410485	0.788335	0.74525	0.799638	0.438731	0.7732	0.490528	0.808249	0.656802
cg18150800	ABCB5		TSS1500	0.869643	0.908788	0.89658	0.888501	0.895212	0.909808	0.890566	0.885089	0.893023	0.8582	0.878968	0.86925	0.888846	0.86402	0.885419	0.877342	0.902654	0.878087
cg20966504	ABCB5		TSS1500	0.873917	0.923537	0.860794	0.896387	0.895681	0.898696	0.743919	0.910494	0.875428	0.889827	0.921827	0.905579	0.856561	0.854816	0.869556	0.936311	0.91928	0.89422
cg21643191	ABCB5		Body;TSS1500;TSS1500;TSS1500	0.870538	0.910577	0.882671	0.905035	0.896804	0.910233	0.872235	0.891896	0.892499	0.893643	0.882028	0.853749	0.830123	0.885808	0.900193	0.915257	0.901082	0.882735
cg23626475	ABCB5		Body;TSS1500;TSS1500;TSS1500	0.880352	0.91763	0.880236	0.888344	0.877386	0.894765	0.871423	0.873072	0.885401	0.849148	0.909574	0.880803	0.754101	0.849504	0.877596	0.894966	0.898235	0.864241
	ABCB5											0.831562									0.825088
cg06716437	ABCB6	Island	TSS1500	0.171769	0.183197	0.184225	0.141875	0.178495	0.152224	0.182453	0.164279	0.169815	0.250254	0.0911429	0.156789	0.230476	0.18078	0.116759	0.0999046	0.148524	0.159329
cg07100128	ABCB6	Island	TSS200	0.0501352	0.0443543	0.0438248	0.047438	0.0518546	0.0357966	0.0395643	0.0279438	0.042614	0.0741435	0.0328761	0.0458564	0.0662036	0.0727341	0.049224	0.0289832	0.0332607	0.0504102
cg07920064	ABCB6	Island	TSS200	0.0317342	0.0398589	0.034093	0.0395619	0.0383861	0.0415848	0.018337	0.0277368	0.0339116	0.067767	0.0316447	0.031241	0.0372603	0.0657292	0.0309302	0.0250677	0.0366103	0.0407813
cg08290072	ABCB6	Island	TSS200	0.0190253	0.0260618	0.021431	0.0214952	0.0223736	0.0195787	0.0157601	0.0183206	0.0205058	0.0164521	0.0197603	0.0232992	0.0197117	0.0228569	0.0200624	0.020573	0.0237488	0.0208081
cg18014247	ABCB6	Island	TSS200	0.0401172	0.0354285	0.0304877	0.0373846	0.0461981	0.0394431	0.0381035	0.0308067	0.0372462	0.037144	0.0305544	0.0295409	0.0324662	0.0538963	0.030573	0.0296044	0.0336804	0.0346825
cg23153680	ABCB6	Island	TSS1500	0.0833116	0.0730273	0.0933495	0.109537	0.116111	0.0916461	0.092513	0.0967595	0.0945319	0.0585891	0.04349	0.107324	0.0543102	0.117066	0.0957842	0.0381417	0.0965444	0.0764062
cg24775454	ABCB6	Island	TSS200	0.0214625	0.0215553	0.0222368	0.0248614	0.0265694	0.0238299	0.0192359	0.0230936	0.0228556	0.0192863	0.0246178	0.0249539	0.0231301	0.0260849	0.0260551	0.0184288	0.0250968	0.0234567
cg26544277	ABCB6	Island	TSS200	0.0524251	0.051313	0.0699314	0.0527773	0.0388309	0.0342272	0.0378673	0.0301917	0.0459455	0.0848835	0.0465706	0.0478561	0.0674352	0.0996085	0.0528032	0.0309269	0.0582763	0.061045
	ABCB6											0.0584281									0.0583648
cg01717812	ABCB7		TSS200	0.0404069	0.0402558	0.0468548	0.0388881	0.0448596	0.0443561	0.039159	0.0367567	0.0414421	0.0420293	0.0452564	0.0403698	0.0521248	0.0720763	0.042252	0.0361438	0.0332059	0.0454323
cg02718579	ABCB7		TSS1500;TSS1500;TSS1500;TSS1500;TSS1500	0.216168	0.204378	0.201234	0.230863	0.193917	0.239621	0.205915	0.231689	0.215473	0.476728	0.238697	0.231074	0.23813	0.287511	0.243833	0.171715	0.181706	0.258674
cg05893491	ABCB7		TSS1500;TSS1500;TSS1500;TSS1500;TSS1500	0.494256	0.338077	0.497313	0.550329	0.430597	0.663486	0.456598	0.384278	0.476867	0.417258	0.361868	0.464977	0.359845	0.391959	0.339392	0.405128	0.46267	0.400387
cg11337462	ABCB7		TSS1500	0.721442	0.804796	0.805021	0.666515	0.788498	0.853253	0.856809	0.68889	0.773153	0.606741	0.790673	0.751284	0.87373	0.746507	0.616207	0.645806	0.681039	0.713998
cg11340371	ABCB7		TSS200	0.0990869	0.0729075	0.0601588	0.0602429	0.0736421	0.0965426	0.0841588	0.0742866	0.0776283	0.0497696	0.0731876	0.0631518	0.0726101	0.103373	0.0771318	0.0893736	0.0666303	0.0744035
cg16227775	ABCB7		TSS200	0.0592098	0.0628084	0.0470017	0.0582979	0.0617204	0.0620988	0.0509169	0.0430077	0.0556327	0.0461781	0.0534941	0.05471	0.0605977	0.0828813	0.0529657	0.0435316	0.0482423	0.0553251
cg20208052	ABCB7		TSS1500	0.590259	0.343726	0.451297	0.532333	0.478333	0.659092	0.439457	0.462443	0.494617	0.720128	0.315489	0.530721	0.307795	0.376619	0.37762	0.552559	0.480414	0.457668
cg21131239	ABCB7		TSS1500	0.589467	0.341476	0.604046	0.602588	0.521935	0.708806	0.603593	0.587638	0.569944	0.828916	0.45146	0.612118	0.545723	0.578276	0.450394	0.697733	0.571767	0.592048
cg27419400	ABCB7		TSS200	0.0684462	0.0594221	0.0581519	0.0603261	0.0656791	0.0495545	0.0730489	0.0516674	0.060787	0.0578348	0.0593975	0.0533938	0.0838454	0.0949016	0.0519218	0.0549263	0.0520904	0.0635389
	ABCB7											0.307283									0.29572
cg02615599	ABCB8	Island	TSS200	0.136441	0.11064	0.103343	0.146315	0.113757	0.182595	0.100864	0.11911	0.126633	0.125505	0.14383	0.103182	0.13555	0.109937	0.125023	0.139875	0.087648	0.121319
cg05429359	ABCB8	Island	TSS200	0.110097	0.0700265	0.0593433	0.0702843	0.0753432	0.114336	0.0717091	0.0771362	0.0810344	0.0782043	0.0878956	0.0658575	0.0863277	0.0859181	0.0588374	0.0835236	0.0644738	0.0763798
cg07222181	ABCB8	Island	TSS200	0.0363716	0.027176	0.0318937	0.038001	0.0341772	0.0254098	0.0313464	0.0192941	0.0304587	0.0311067	0.0252748	0.0307413	0.0376795	0.0450165	0.0372323	0.026579	0.0291817	0.0328515
cg09215510	ABCB8	N_Shore	TSS1500;TSS1500;TSS1500;TSS1500	0.784941	0.886061	0.765754	0.814653	0.810374	0.830264	0.705147	0.775595	0.796599	0.791089	0.839787	0.821158	0.800752	0.815165	0.67643	0.785969	0.860372	0.79884
cg12500498	ABCB8	Island	TSS200	0.0290691	0.024668	0.0277677	0.0448618	0.026161	0.0210042	0.0333308	0.0200187	0.0283602	0.0308681	0.0303632	0.0314833	0.0261164	0.0463991	0.0300685	0.022465	0.0227373	0.0300626
cg15447715	ABCB8	Island	TSS200	0.0331142	0.0371953	0.0335495	0.0436188	0.040712	0.0707556	0.0396056	0.053147	0.0439623	0.0499899	0.0455063	0.0390107	0.0355943	0.0502099	0.0369284	0.04047	0.0427122	0.0425527
cg18541211	ABCB8	N_Shore	TSS1500	0.0276036	0.0292304	0.0331765	0.0329013	0.0310709	0.0384617	0.0270437	0.0277399	0.0309035	0.0402056	0.0242516	0.0250709	0.0296175	0.0574737	0.0295235	0.0228124	0.0256458	0.0318251
cg20456055	ABCB8	Island	TSS1500	0.0315242	0.0201393	0.0346727	0.0432328	0.0243517	0.0230989	0.0241949	0.0277852	0.028625	0.0208308	0.0290227	0.0337625	0.0373633	0.0384951	0.0265089	0.0276286	0.0246114	0.0297779
cg20798412	ABCB8	Island	TSS200	0.0330352	0.0265062	0.0255629	0.0319686	0.0278528	0.0244413	0.0184801	0.0217431	0.0261988	0.0227522	0.0183056	0.0337475	0.0201456	0.038774	0.029615	0.0207012	0.0231271	0.025896
	ABCB8											0.132531									0.132167
cg03328639	ABCB9	S_Shore	5'UTR;TSS1500;TSS1500	0.0973733	0.0634251	0.0608527	0.0767548	0.0975066	0.034305	0.0366929	0.0451466	0.0640071	0.0170947	0.0264662	0.0337145	0.0248696	0.0636313	0.0245807	0.0546117	0.05895	0.0379898
cg05973401	ABCB9	Island	TSS200;5'UTR;TSS200	0.035333	0.0294377	0.0295092	0.032345	0.0507079	0.0446236	0.0361775	0.0352094	0.0366679	0.0277011	0.031427	0.0302639	0.0319258	0.0338904	0.0348697	0.0369434	0.0167412	0.0304703
cg07949141	ABCB9	S_Shore	5'UTR;TSS1500;TSS1500	0.567687	0.696624	0.570346	0.633304	0.641447	0.671713	0.603548	0.627161	0.626479	0.740721	0.59992	0.627716	0.631244	0.637204	0.581744	0.604264	0.631284	0.631762
cg11933232	ABCB9	Island	TSS200;5'UTR;TSS200	0.0450901	0.0644546	0.0932118	0.0600022	0.0682603	0.0452831	0.0693989	0.0530239	0.0623406	0.0659974	0.0485811	0.0524553	0.0482978	0.0718566	0.0454285	0.0816696	0.061218	0.059438
cg15348274	ABCB9	Island	TSS200;5'UTR;TSS200	0.334978	0.365596	0.435599	0.40946	0.423674	0.464952	0.472573	0.506326	0.426645	0.3851	0.453806	0.388872	0.381747	0.460889	0.395534	0.460589	0.397101	0.415455
cg16139227	ABCB9	S_Shore	5'UTR;TSS1500;TSS1500	0.126733	0.128974	0.0977473	0.108859	0.143275	0.0781855	0.100739	0.0606912	0.105651	0.113193	0.0614392	0.0776612	0.136947	0.109861	0.0800446	0.0740498	0.0982037	0.0939249
cg19341953	ABCB9	Island	TSS200;TSS200;TSS200;TSS200;TSS200	0.0723218	0.0635914	0.0959107	0.0831071	0.0594725	0.0389629	0.0473828	0.0491038	0.0637316	0.0223323	0.0484228	0.0536811	0.0796854	0.0817386	0.0479315	0.0402883	0.0611892	0.0544087
cg22341471	ABCB9	S_Shore	5'UTR;TSS1500;TSS1500	0.272625	0.299107	0.310249	0.296772	0.301892	0.228781	0.238908	0.244581	0.274114	0.291087	0.211778	0.216596	0.230057	0.317748	0.193751	0.23608	0.275745	0.246605
cg22813729	ABCB9	S_Shore	TSS1500;TSS1500;TSS1500;TSS1500;TSS1500	0.554804	0.633062	0.594917	0.572921	0.6073	0.681733	0.607304	0.612287	0.608041	0.662193	0.614309	0.625334	0.653961	0.645305	0.646784	0.570241	0.642485	0.632576
cg27656398	ABCB9	Island	TSS200;5'UTR;TSS200	0.064386	0.0439169	0.0592453	0.073478	0.0609398	0.0787865	0.0416293	0.0445639	0.0583682	0.0383473	0.0661369	0.0638606	0.0846441	0.0796444	0.064076	0.0440391	0.0596381	0.0625483
	ABCB9											0.232604									0.226518
cg03305305	ABCC1	Island	TSS200;TSS200;TSS200;TSS200;TSS200	0.0481559	0.0349012	0.0386582	0.0333462	0.0427468	0.043887	0.030664	0.0298759	0.0377794	0.0524484	0.0375175	0.0463699	0.0484379	0.0481327	0.0301192	0.0363527	0.036294	0.041959
cg04879387	ABCC1	N_Shore	TSS1500;TSS1500;TSS1500;TSS1500;TSS1500	0.0912007	0.0872296	0.0480736	0.1025	0.0790742	0.0682505	0.065262	0.0496894	0.07391	0.0438611	0.0824715	0.0757901	0.051084	0.126317	0.102752	0.0576878	0.0810235	0.0776234
cg06869445	ABCC1	Island	TSS200;TSS200;TSS200;TSS200;TSS200	0.0204747	0.0257562	0.0204061	0.0230907	0.0217628	0.0189288	0.0206263	0.0236915	0.0218421	0.0249885	0.020629	0.0213092	0.0248535	0.0331773	0.0213069	0.019429	0.0242512	0.0237431
cg07818563	ABCC1	Island	TSS1500;TSS1500;TSS1500;TSS1500;TSS1500	0.043886	0.0598643	0.0412322	0.0513017	0.0566099	0.0530126	0.0275391	0.0508592	0.0480381	0.078833	0.0462487	0.0446291	0.0496977	0.0749781	0.0487786	0.0613596	0.0471986	0.0564654
cg12252295	ABCC1	Island	TSS200	0.0199547	0.0194489	0.0192327	0.0219993	0.0172697	0.0177505	0.0152438	0.0161629	0.0183828	0.0162804	0.0187605	0.020142	0.0207256	0.023419	0.019823	0.0141784	0.0183458	0.0189593
cg16961111	ABCC1	Island	TSS200	0.016092	0.0171426	0.0138783	0.0176075	0.0141291	0.0137553	0.0125542	0.014315	0.0149342	0.0124317	0.0162144	0.0132573	0.0162139	0.0207499	0.0133153	0.0101447	0.0129756	0.0144129
cg17199483	ABCC1	N_Shore	TSS1500;TSS1500;TSS1500;TSS1500;TSS1500	0.491951	0.418299	0.360132	0.453633	0.418087	0.446368	0.465619	0.363455	0.427193	0.507756	0.432038	0.412205	0.40346	0.486757	0.425893	0.420263	0.453948	0.44279
cg20158248	ABCC1	N_Shore	TSS1500;TSS1500;TSS1500;TSS1500;TSS1500	0.181064	0.19667	0.212386	0.187542	0.221156	0.183299	0.167138	0.154126	0.187923	0.172302	0.125501	0.145857	0.213462	0.202776	0.17885	0.151322	0.161136	0.168901
cg23836931	ABCC1	N_Shore	TSS1500	0.937153	0.950205	0.946564	0.950252	0.946547	0.936448	0.948077	0.94439	0.944954	0.953912	0.955169	0.946106	0.941877	0.950276	0.948123	0.952034	0.951693	0.949899
cg24874689	ABCC1	Island	TSS200;TSS200;TSS200;TSS200;TSS200	0.0442568	0.0332466	0.0361254	0.0379317	0.0436276	0.0301875	0.0371554	0.0273798	0.0362388	0.0545933	0.030425	0.0348618	0.0595533	0.0735667	0.0329644	0.0237218	0.0318132	0.0426874
	ABCC1											0.18112									0.183744
cg00429758	ABCC10	N_Shore	TSS1500	0.0665534	0.176614	0.199689	0.202935	0.213949	0.459971	0.137677	0.139916	0.199663	0.428276	0.353758	0.170135	0.191099	0.136368	0.270863	0.336496	0.13661	0.252951
cg03245019	ABCC10	Island	TSS200	0.027323	0.027612	0.0261088	0.0363378	0.0275325	0.0220365	0.0248623	0.0197206	0.0264417	0.0579619	0.0209588	0.0296479	0.0337323	0.0399041	0.0306637	0.0187669	0.0302321	0.0327335
cg05021649	ABCC10	N_Shore	TSS1500	0.829693	0.871536	0.844381	0.895252	0.869779	0.886559	0.80055	0.866675	0.858053	0.828794	0.794346	0.871428	0.835026	0.839787	0.807234	0.853416	0.8364	0.833304
cg10856810	ABCC10	N_Shore	TSS1500	0.889306	0.913562	0.911902	0.924673	0.909381	0.912251	0.891006	0.904255	0.907042	0.822001	0.907019	0.90922	0.881115	0.914882	0.910384	0.906326	0.91508	0.895753
cg12572677	ABCC10	S_Shelf	TSS1500	0.894076	0.854685	0.869407	0.913712	0.902126	0.88658	0.889683	0.898687	0.88862	0.940633	0.896153	0.893209	0.865605	0.902429	0.90128	0.889356	0.900553	0.898652
cg15550407	ABCC10	N_Shore	TSS200	0.0356911	0.0278701	0.032006	0.0396146	0.0264578	0.0215095	0.0235114	0.0212101	0.0284838	0.022108	0.0180598	0.028644	0.0457073	0.0453865	0.031656	0.0277008	0.0233908	0.0303316
cg21797033	ABCC10	N_Shore	TSS200	0.0379064	0.0236373	0.0230577	0.034551	0.0282001	0.0319055	0.0254764	0.0268975	0.028954	0.0321791	0.0234111	0.0277742	0.0453309	0.0426928	0.0215114	0.0245962	0.023608	0.030138
cg22343233	ABCC10	Island	TSS200	0.0394605	0.0364898	0.0242518	0.0244512	0.0249677	0.0176811	0.0298171	0.0197011	0.0271025	0.0485401	0.0184714	0.0220115	0.0704402	0.0596376	0.0262572	0.012642	0.0235638	0.0351955
cg23781719	ABCC10	S_Shelf	TSS1500	0.803183	0.848164	0.838006	0.86557	0.838801	0.860527	0.792397	0.825943	0.834074	0.693742	0.820207	0.770081	0.730629	0.879777	0.864859	0.852047	0.831432	0.805347
cg25471404	ABCC10	N_Shore	TSS200	0.0279154	0.0199754	0.0194327	0.0191019	0.0246112	0.0195448	0.0192116	0.0204857	0.0212848	0.0180585	0.0168988	0.0193857	0.0251642	0.0311266	0.0204453	0.0148161	0.0163733	0.0202836
cg25545088	ABCC10	S_Shelf	TSS1500	0.584872	0.565719	0.668358	0.676627	0.642148	0.778419	0.678417	0.654939	0.656187	0.847351	0.751556	0.743869	0.643867	0.581787	0.65291	0.720706	0.632866	0.696864
cg26511326	ABCC10	S_Shelf	TSS200	0.863684	0.734279	0.681163	0.735741	0.800891	0.81166	0.859219	0.594906	0.760193	0.718138	0.639552	0.634331	0.778428	0.857084	0.744929	0.880618	0.668561	0.740205
cg27426127	ABCC10	N_Shore	TSS1500	0.0602298	0.198802	0.162266	0.170397	0.218456	0.295417	0.115774	0.107558	0.166112	0.183855	0.205325	0.132818	0.182394	0.155184	0.155947	0.127382	0.0972625	0.155021
	ABCC10											0.415555									0.417445
cg04388863	ABCC11		TSS1500;TSS1500	0.662939	0.738786	0.683768	0.698566	0.758349	0.430396	0.770663	0.63702	0.672561	0.524279	0.443749	0.644524	0.421477	0.744971	0.414111	0.585785	0.553441	0.541542
cg08404739	ABCC11		TSS1500;TSS1500	0.76136	0.830181	0.829519	0.820766	0.858746	0.546629	0.785173	0.741626	0.77175	0.640074	0.51833	0.738012	0.560603	0.754808	0.517837	0.655353	0.729784	0.63935
cg09147400	ABCC11		TSS1500;TSS1500	0.791451	0.901748	0.70017	0.803638	0.814995	0.468793	0.67613	0.718109	0.734379	0.743582	0.503477	0.726017	0.646863	0.737516	0.609433	0.548704	0.635524	0.64389
cg14222597	ABCC11		TSS1500;TSS1500	0.466382	0.551476	0.500988	0.5147	0.5267	0.337025	0.50707	0.451129	0.481934	0.400198	0.303789	0.376558	0.299905	0.509455	0.337387	0.379741	0.434943	0.380247
cg17562972	ABCC11		TSS1500;TSS1500	0.428208	0.421935	0.417396	0.372678	0.453898	0.134499	0.366574	0.259539	0.356841	0.201745	0.100472	0.29088	0.115323	0.288682	0.167761	0.166368	0.259931	0.198895
cg25274975	ABCC11		TSS200;TSS200	0.828746	0.85511	0.658889	0.827414	0.807456	0.903498	0.796841	0.718399	0.799544	0.917493	0.897552	0.874969	0.857545	0.7879	0.844117	0.755927	0.834037	0.846193
	ABCC11											0.636168									0.541686
cg09312996	ABCC12		TSS1500	0.741743	0.674197	0.681377	0.694723	0.726786	0.710624	0.710448	0.637366	0.697158	0.725756	0.628535	0.690744	0.759875	0.705494	0.672459	0.756123	0.594607	0.691699
cg14074641	ABCC12		TSS1500	0.852504	0.893459	0.850062	0.876378	0.887955	0.887309	0.884922	0.877173	0.87622	0.817999	0.82796	0.820314	0.837045	0.883928	0.735082	0.862516	0.875767	0.832576
cg21723907	ABCC12		TSS1500	0.880126	0.907051	0.891578	0.921667	0.898686	0.917778	0.907122	0.891247	0.901907	0.8725	0.884536	0.892404	0.894482	0.896677	0.887535	0.903715	0.909032	0.89261
cg22643233	ABCC12		TSS1500	0.803884	0.824531	0.801895	0.857284	0.791281	0.872871	0.874396	0.825003	0.831393	0.834557	0.851473	0.85064	0.83597	0.826603	0.811192	0.873213	0.861776	0.843178
	ABCC12											0.82667									0.815016
cg04985582	ABCC13		TSS200;TSS200	0.489168	0.490625	0.51628	0.456781	0.262011	0.346848	0.645572	0.503659	0.463868	0.613118	0.460939	0.26143	0.113347	0.53511	0.12512	0.378157	0.454147	0.367671
cg05699681	ABCC13		TSS200;TSS200	0.452503	0.505634	0.511362	0.524843	0.27239	0.444835	0.650421	0.410892	0.47161	0.693635	0.547323	0.276893	0.306544	0.5888	0.229488	0.404397	0.463077	0.43877
cg09598431	ABCC13		TSS200;TSS200	0.109161	0.109421	0.129922	0.178515	0.111859	0.113859	0.180137	0.107704	0.130072	0.18384	0.0812161	0.0584367	0.0352177	0.182448	0.0497437	0.0652877	0.119409	0.0969499
cg18631692	ABCC13		TSS1500;TSS1500	0.824775	0.894029	0.869737	0.88232	0.884709	0.903603	0.874466	0.86377	0.874676	0.874698	0.877975	0.833497	0.724082	0.879198	0.786571	0.888597	0.862586	0.840901
cg19211382	ABCC13		TSS1500;TSS1500	0.815578	0.872884	0.839774	0.870285	0.827416	0.857373	0.874249	0.866915	0.853059	0.897191	0.869389	0.768206	0.632215	0.867422	0.794777	0.869856	0.822487	0.815193
cg23322112	ABCC13		TSS1500;TSS1500	0.933583	0.951295	0.922208	0.928731	0.940397	0.939014	0.936927	0.937954	0.936264	0.942939	0.939129	0.918165	0.91896	0.927822	0.912775	0.945298	0.92557	0.928832
	ABCC13											0.621592									0.581386
cg05914069	ABCC2		TSS1500	0.847206	0.812023	0.758885	0.788612	0.831882	0.802708	0.830039	0.827069	0.812303	0.784237	0.856216	0.835197	0.854361	0.847395	0.752036	0.813682	0.808757	0.818985
cg08551188	ABCC2		TSS1500	0.855277	0.911019	0.81445	0.791301	0.755718	0.884161	0.827029	0.846426	0.835673	0.706238	0.860193	0.790624	0.766048	0.817746	0.778952	0.857597	0.855043	0.804055
cg09448875	ABCC2		TSS200	0.913933	0.935598	0.831328	0.904555	0.909048	0.900575	0.900638	0.882606	0.897285	0.941805	0.877941	0.894204	0.881213	0.922564	0.799235	0.868112	0.927044	0.889015
cg11846724	ABCC2		TSS1500	0.829396	0.959499	0.825085	0.872614	0.842443	0.86173	0.788962	0.817937	0.849708	0.7824	0.801523	0.765581	0.747305	0.831215	0.824995	0.829215	0.839313	0.802693
cg16377144	ABCC2		TSS1500	0.858538	0.824098	0.785223	0.865671	0.825792	0.842693	0.806789	0.855294	0.833012	0.845556	0.828588	0.856539	0.783836	0.837305	0.827156	0.866298	0.846205	0.836435
cg22492435	ABCC2		TSS200	0.936095	0.931391	0.909814	0.894676	0.922935	0.927183	0.92589	0.921272	0.921157	0.852198	0.92631	0.883037	0.899054	0.911739	0.918672	0.9104	0.929952	0.90392
	ABCC2											0.85819									0.842517
cg00126959	ABCC3	Island	TSS200;TSS200	0.0152559	0.0226824	0.0686986	0.0298198	0.033998	0.0191998	0.0136058	0.0340864	0.0296683	0.104957	0.486408	0.017949	0.434688	0.0339508	0.358837	0.54791	0.0145601	0.249907
cg00926939	ABCC3	N_Shore	TSS1500;TSS1500	0.941292	0.942391	0.9186	0.935018	0.937724	0.958759	0.953752	0.934277	0.940227	0.941168	0.957612	0.93838	0.954285	0.939122	0.927815	0.957376	0.939757	0.944439
cg03965044	ABCC3	Island	TSS200;TSS200	0.03031	0.0272816	0.0792064	0.0472604	0.0511446	0.0291601	0.0209336	0.0324563	0.0397191	0.128051	0.497319	0.0296826	0.485727	0.0404753	0.364935	0.648307	0.0289914	0.277936
cg05599550	ABCC3	N_Shore	TSS1500;TSS1500	0.0480876	0.0918475	0.0875108	0.0980184	0.0844574	0.242628	0.0498995	0.045515	0.0934955	0.392978	0.360576	0.158799	0.188017	0.0997655	0.253276	0.294695	0.0946074	0.230339
cg08014994	ABCC3	Island	TSS200;TSS200	0.0229041	0.0270445	0.0319689	0.0374575	0.033153	0.032444	0.023763	0.0326989	0.0301792	0.0704088	0.42579	0.0276601	0.393603	0.0467947	0.251963	0.566831	0.0283887	0.22643
cg14942542	ABCC3	N_Shore	TSS1500;TSS1500	0.0964911	0.101819	0.126378	0.0833268	0.0662406	0.304928	0.0670246	0.07218	0.114799	0.500241	0.35389	0.20252	0.11084	0.165387	0.280644	0.443698	0.0596964	0.264615
cg18891141	ABCC3	N_Shore	TSS1500;TSS1500	0.49695	0.583688	0.391338	0.517432	0.497784	0.602673	0.493228	0.435197	0.502286	0.592564	0.639068	0.498584	0.52526	0.570393	0.579586	0.525814	0.551978	0.560406
cg19248656	ABCC3	Island	TSS200;TSS200	0.0233892	0.0248663	0.0463731	0.0352591	0.0303159	0.0262377	0.0234716	0.0252391	0.029394	0.1279	0.487031	0.0231938	0.439801	0.0439778	0.276521	0.585725	0.0212752	0.250678
cg19643390	ABCC3	Island	TSS200;TSS200	0.0755193	0.0562849	0.136383	0.0788853	0.0994619	0.0793806	0.0811448	0.0888253	0.0869856	0.105413	0.483027	0.0356622	0.434281	0.0804049	0.345512	0.576547	0.0486784	0.263691
cg20633883	ABCC3	Island	TSS200;TSS200	0.0509442	0.0406794	0.0697852	0.0602174	0.0443605	0.0655848	0.0668902	0.0488082	0.0559087	0.154682	0.301911	0.0506144	0.218128	0.0471347	0.119811	0.357884	0.0388675	0.161129
cg23340875	ABCC3	N_Shore	TSS1500;TSS1500	0.0303328	0.0377551	0.0318779	0.0459283	0.028661	0.117557	0.0379555	0.0266305	0.0445873	0.168069	0.264994	0.0650298	0.177132	0.0825195	0.122906	0.33242	0.0315994	0.155584
cg27222669	ABCC3	N_Shore	TSS1500;TSS1500	0.725362	0.789904	0.686384	0.748658	0.720746	0.820865	0.760095	0.753504	0.75069	0.803393	0.812802	0.722731	0.77668	0.798379	0.780649	0.734417	0.750986	0.772505
	ABCC3											0.226495									0.363138
cg14189621	ABCC4	Island	TSS1500;TSS1500	0.0246338	0.0273062	0.0281405	0.0305968	0.0338267	0.0332787	0.0325701	0.0253207	0.0294592	0.0289371	0.0294241	0.0278526	0.0309536	0.037485	0.0278867	0.0266097	0.0260779	0.0294033
cg15388598	ABCC4	Island	TSS1500;TSS1500	0.0164885	0.0201334	0.0189611	0.0196393	0.0154999	0.0144673	0.0128221	0.0157038	0.0167144	0.0185629	0.0180647	0.0170511	0.0232111	0.0248031	0.0137139	0.0294917	0.0161693	0.0201335
cg19969624	ABCC4	Island	TSS1500;TSS1500;TSS1500;TSS1500	0.0661992	0.452953	0.462628	0.0443932	0.968884	0.454566	0.0436843	0.449361	0.367834	0.600941	0.448593	0.963723	0.932041	0.957445	0.0415268	0.969865	0.970957	0.735636
cg24476569	ABCC4	S_Shore	TSS1500;TSS1500	0.518177	0.51526	0.365274	0.550093	0.396897	0.517729	0.536215	0.504121	0.487971	0.399625	0.517334	0.361112	0.384631	0.360877	0.419564	0.329703	0.264377	0.379653
cg26751094	ABCC4	S_Shore	TSS1500;TSS1500	0.677063	0.605506	0.514368	0.700688	0.531701	0.637538	0.741288	0.605397	0.626694	0.651076	0.558442	0.555364	0.42754	0.525329	0.515479	0.464266	0.451018	0.518564
	ABCC4											0.305734									0.336678
cg00339713	ABCC5	S_Shore	TSS1500;TSS1500	0.019952	0.0300323	0.0295924	0.0328466	0.0244171	0.0243782	0.0245193	0.0255895	0.0264159	0.0349929	0.0215615	0.0212914	0.0260823	0.0359186	0.0254271	0.0141612	0.0233051	0.0253425
cg03449387	ABCC5	Island	TSS1500;TSS1500	0.0301939	0.0267146	0.02135	0.0272124	0.0205904	0.0220958	0.0198021	0.0292925	0.0246565	0.0237456	0.0242357	0.0289793	0.0281726	0.0319335	0.0344102	0.0228122	0.0288795	0.0278961
cg13792075	ABCC5	Island	TSS200;TSS200	0.0178221	0.0324405	0.0211606	0.0231061	0.0252557	0.0228367	0.0181648	0.0186852	0.022434	0.115678	0.0261854	0.019396	0.0654885	0.066438	0.0198902	0.0159738	0.0203323	0.0436728
cg14480679	ABCC5	Island	TSS200;TSS200	0.00977287	0.0177324	0.0111062	0.0154533	0.0104991	0.00985209	0.011106	0.0100701	0.011949	0.0137495	0.0108242	0.0112816	0.0123414	0.0190397	0.0100286	0.00974005	0.0106597	0.0122081
cg15988394	ABCC5	Island	TSS1500;TSS1500	0.0287285	0.0281158	0.0306797	0.0448885	0.0257236	0.0313226	0.0259854	0.0232626	0.0298383	0.0572709	0.0190262	0.0282484	0.0435968	0.0423871	0.0278902	0.0175357	0.0264131	0.0327961
cg16378421	ABCC5	S_Shore	TSS1500;TSS1500	0.109529	0.128862	0.100173	0.119058	0.0986709	0.0592657	0.0816078	0.0822747	0.0974301	0.0642042	0.0395482	0.0611471	0.0783859	0.125824	0.064035	0.0565394	0.0781855	0.0709837
cg16738229	ABCC5	S_Shore	TSS1500;TSS1500	0.704063	0.581623	0.583148	0.588603	0.69221	0.44097	0.741752	0.60368	0.617006	0.689032	0.507684	0.453683	0.361846	0.56794	0.420892	0.420517	0.628787	0.506298
cg26091908	ABCC5	Island	TSS200;TSS200	0.0873636	0.0581775	0.0482716	0.0608925	0.0488081	0.0606144	0.0739381	0.0301496	0.0585269	0.162572	0.0385917	0.0514763	0.124713	0.110126	0.053103	0.0800717	0.0398017	0.0825569
	ABCC5											0.111032									0.100219
cg06289735	ABCC6P1	N_Shore	TSS1500	0.907996	0.904894	0.900597	0.890419	0.920759	0.911917	0.918559	0.900736	0.906985	0.87354	0.845545	0.834802	0.881996	0.916076	0.702279	0.917183	0.861199	0.854077
cg08130520	ABCC6P1	N_Shore	TSS1500	0.890686	0.899607	0.913588	0.843648	0.89823	0.9079	0.915493	0.900741	0.896237	0.895588	0.896626	0.869837	0.895227	0.879628	0.845876	0.905501	0.831067	0.877419
cg20203854	ABCC6P1	N_Shore	TSS1500	0.884488	0.889121	0.904286	0.862229	0.873457	0.852828	0.881763	0.879415	0.878448	0.819665	0.849337	0.866193	0.887091	0.89877	0.79001	0.895472	0.839724	0.855783
	ABCC6P1											0.89389									0.862426
cg14211015	ABCC6P2	S_Shore	TSS1500	0.623282	0.666471	0.580793	0.687561	0.659835	0.684964	0.635162	0.657925	0.649499	0.627209	0.710054	0.534406	0.600845	0.679216	0.555649	0.653461	0.681688	0.630316
cg19511817	ABCC6P2	Island	TSS1500	0.0754218	0.0506454	0.127732	0.0903192	0.084269	0.0894139	0.0901695	0.0806383	0.0860761	0.206468	0.0724855	0.0611571	0.104302	0.0958397	0.0443339	0.0754853	0.0776836	0.0922194
	ABCC6P2											0.367788									0.361268
cg00289429	ABCC8	Island	TSS200	0.0649411	0.0620837	0.11149	0.0846129	0.0698743	0.309352	0.0934951	0.0667851	0.107829	0.104137	0.127723	0.078504	0.163298	0.0886798	0.272481	0.253901	0.0718599	0.145073
cg03181582	ABCC8	Island	TSS200	0.105677	0.0767398	0.147362	0.15494	0.0866192	0.414758	0.121391	0.0556627	0.145394	0.329723	0.291728	0.164093	0.261331	0.132141	0.312227	0.302441	0.116229	0.238739
cg03790908	ABCC8	Island	TSS200	0.0169788	0.0158325	0.0337234	0.0252328	0.0163975	0.0279034	0.0139937	0.0165939	0.020832	0.0319083	0.0201109	0.0144838	0.0191754	0.0193476	0.0524327	0.0343199	0.017239	0.0261272
cg03835043	ABCC8	S_Shore	TSS1500;TSS1500	0.645321	0.820945	0.641209	0.769603	0.87926	0.880723	0.725634	0.865276	0.778496	0.848777	0.874095	0.792817	0.882893	0.649643	0.742403	0.78826	0.798789	0.79721
cg10700689	ABCC8	S_Shore	TSS1500;TSS1500	0.209455	0.196407	0.261564	0.258024	0.350697	0.289272	0.248783	0.278654	0.261607	0.481036	0.464285	0.260607	0.123864	0.286911	0.287725	0.227473	0.226639	0.294818
cg13185308	ABCC8	S_Shore	TSS1500	0.350951	0.46183	0.396898	0.434513	0.512965	0.595085	0.43884	0.520937	0.464002	0.608419	0.528983	0.466408	0.515974	0.49871	0.549297	0.494945	0.447504	0.51378
cg14469826	ABCC8	S_Shore	TSS1500	0.342641	0.322861	0.449104	0.406841	0.384815	0.514629	0.399647	0.401146	0.40271	0.4144	0.427632	0.270665	0.187891	0.35763	0.274976	0.23561	0.323368	0.311522
cg15683950	ABCC8	S_Shore	TSS1500	0.432961	0.43571	0.412899	0.542203	0.530496	0.696247	0.390663	0.576853	0.502254	0.63194	0.642062	0.554953	0.383254	0.537423	0.535305	0.537644	0.498625	0.540151
cg17381377	ABCC8	Island	TSS200	0.0751639	0.0788109	0.117528	0.143564	0.0925428	0.417151	0.0631138	0.0838586	0.133967	0.299236	0.223475	0.120338	0.187501	0.130878	0.336965	0.245113	0.080159	0.202958
cg18097532	ABCC8	Island	TSS200	0.178874	0.114745	0.211691	0.22463	0.153557	0.524625	0.102729	0.0996377	0.201311	0.255615	0.396609	0.326598	0.386159	0.239504	0.460248	0.448274	0.163327	0.334542
cg22240472	ABCC8	Island	TSS200	0.0796159	0.0285613	0.0896595	0.0761919	0.0774374	0.210246	0.0393203	0.0357918	0.079603	0.241105	0.113206	0.0521563	0.135925	0.0351566	0.161285	0.18975	0.0405766	0.121145
	ABCC8											0.281637									0.320551
cg09185990	ABCC9	N_Shelf	TSS1500;TSS1500;TSS1500	0.85942	0.896545	0.767365	0.8388	0.874411	0.805728	0.877322	0.821452	0.84263	0.820165	0.826146	0.725977	0.782772	0.85466	0.677333	0.865232	0.79567	0.793494
cg14816579	ABCC9	N_Shelf	TSS1500;TSS1500	0.821626	0.848678	0.842601	0.858531	0.873475	0.845416	0.809374	0.827697	0.840925	0.847757	0.829223	0.72483	0.820571	0.826846	0.80165	0.838452	0.843119	0.816556
cg16361596	ABCC9		TSS200;TSS200	0.784496	0.861806	0.770054	0.850128	0.856397	0.851356	0.813666	0.790967	0.822359	0.821287	0.784977	0.736242	0.907687	0.801906	0.645456	0.763168	0.790405	0.781391
cg22213622	ABCC9	N_Shelf	TSS1500;TSS1500;TSS1500	0.888663	0.914449	0.882324	0.889155	0.895273	0.914184	0.909166	0.881719	0.896867	0.897736	0.86123	0.868463	0.854021	0.887133	0.820978	0.898035	0.906833	0.874304
cg25747468	ABCC9	N_Shelf	TSS1500;TSS1500;TSS1500	0.825036	0.876838	0.8273	0.889747	0.872934	0.887652	0.868837	0.849332	0.86221	0.857374	0.856933	0.820904	0.829836	0.870518	0.817835	0.852566	0.850354	0.84454
	ABCC9											0.852998									0.822057
cg08424219	ABCD2		TSS1500	0.0428325	0.0404536	0.0567118	0.0647792	0.0451022	0.0384253	0.0677544	0.0517758	0.0509793	0.0474291	0.0460966	0.0444166	0.0569071	0.0756614	0.0470334	0.0459448	0.0558397	0.0524161
cg09400979	ABCD2		TSS200	0.120073	0.0781163	0.0866836	0.095283	0.0777496	0.0630708	0.0902091	0.0795128	0.0863373	0.133988	0.0919153	0.0829465	0.119869	0.13329	0.0878762	0.071206	0.0684801	0.0986964
cg14673233	ABCD2		TSS1500	0.829582	0.906153	0.767519	0.884948	0.877971	0.904194	0.824988	0.841197	0.854569	0.873251	0.89503	0.844546	0.901178	0.869055	0.826747	0.906049	0.864828	0.872586
cg15876417	ABCD2		TSS1500	0.0529888	0.0449898	0.0402882	0.0789677	0.0532285	0.0304816	0.0512184	0.0466634	0.0498533	0.0708827	0.0367372	0.0574111	0.0474436	0.0779302	0.0380853	0.00994829	0.0440041	0.0478053
cg17122425	ABCD2		TSS1500	0.759403	0.732965	0.646812	0.703618	0.70179	0.814057	0.703693	0.633629	0.711996	0.764874	0.845444	0.761755	0.747004	0.739507	0.685874	0.86322	0.756487	0.770521
cg25978214	ABCD2		TSS200	0.0367294	0.0287864	0.0273007	0.0450629	0.0327945	0.0291462	0.0342286	0.0324855	0.0333168	0.0382312	0.034635	0.0384872	0.0478761	0.0601582	0.0391135	0.0312844	0.0363551	0.0407676
cg26980789	ABCD2		TSS1500	0.151471	0.0768676	0.147057	0.122514	0.0805434	0.091352	0.108041	0.118723	0.112071	0.150243	0.10552	0.160616	0.115048	0.144731	0.0825884	0.136046	0.121624	0.127052
cg27288424	ABCD2		TSS200	0.0806296	0.0176224	0.0445955	0.0644367	0.0502314	0.0488969	0.0577414	0.0393769	0.0504413	0.0394032	0.0569838	0.0111341	0.0615427	0.0831626	0.0180473	0.0514729	0.0409251	0.045334
	ABCD2											0.243696									0.256897
cg03064968	ABCD3	Island	TSS1500;TSS1500	0.031381	0.0269465	0.0291581	0.0390941	0.0372543	0.0329025	0.0256668	0.0254872	0.0309863	0.0314248	0.0275035	0.0308776	0.0346828	0.0438445	0.0282814	0.021367	0.0244132	0.0302994
cg09000830	ABCD3	Island	TSS200;TSS200	0.0930617	0.0980273	0.0737004	0.0724268	0.0655736	0.0809464	0.0963487	0.0469487	0.0783792	0.218693	0.0479063	0.0670722	0.196642	0.174403	0.0684568	0.0815677	0.0619211	0.114583
cg15562706	ABCD3	Island	TSS1500;TSS1500	0.0192708	0.0231848	0.0305356	0.0316069	0.022309	0.0190185	0.0192851	0.0275953	0.0241007	0.0150174	0.0231214	0.0264482	0.022383	0.0326867	0.020736	0.0184405	0.0234063	0.0227799
cg17906523	ABCD3	Island	TSS1500;TSS1500	0.0525612	0.0543118	0.0537586	0.0498447	0.0606384	0.0490261	0.0403861	0.0391455	0.049959	0.0491998	0.0333617	0.0412867	0.0617998	0.0587345	0.0590093	0.0431005	0.0491871	0.0494599
cg18019088	ABCD3	N_Shore	TSS1500;TSS1500	0.900976	0.942853	0.924301	0.933717	0.937567	0.939592	0.935378	0.93503	0.931177	0.923253	0.939062	0.908567	0.908212	0.932763	0.916835	0.938874	0.931075	0.92483
cg21930399	ABCD3	Island	TSS200;TSS200	0.00901436	0.0184297	0.0151554	0.0112036	0.0104077	0.00945744	0.0100947	0.00974294	0.0116882	0.0200967	0.00936443	0.0113997	0.0254295	0.0453254	0.0106471	0.00782323	0.0106952	0.0175977
cg23250288	ABCD3	Island	TSS1500;TSS1500	0.013011	0.0140877	0.0136571	0.0142739	0.0122162	0.0122049	0.0123751	0.0137815	0.0132009	0.0126025	0.0153061	0.0135909	0.0128595	0.0189948	0.0133196	0.00936873	0.0139425	0.0137481
cg24215727	ABCD3	N_Shore	TSS1500;TSS1500	0.0450391	0.0347568	0.0467055	0.0302659	0.0464861	0.0420999	0.0284539	0.0340663	0.0384842	0.0472786	0.030049	0.0289388	0.0316984	0.0450752	0.0345255	0.0349092	0.0270424	0.0349396
	ABCD3											0.147247									0.15103
cg01507833	ABCD4	S_Shore	TSS1500;TSS1500	0.925739	0.919852	0.914816	0.921775	0.911482	0.923295	0.918392	0.923192	0.919818	0.89762	0.922779	0.910949	0.926831	0.909179	0.905554	0.931746	0.917376	0.915254
cg05701341	ABCD4	Island	TSS200;TSS200	0.0412021	0.0407474	0.0471415	0.0602608	0.0441686	0.034239	0.0352688	0.0388572	0.0427357	0.027058	0.0409182	0.0442788	0.0304779	0.0754979	0.0406832	0.0283234	0.0478338	0.0418839
cg05930438	ABCD4	S_Shore	TSS1500;TSS1500	0.848568	0.657738	0.833467	0.781605	0.737087	0.465038	0.836656	0.75904	0.7399	0.536147	0.478798	0.719102	0.515881	0.777044	0.582756	0.699903	0.785699	0.636916
cg10071848	ABCD4	S_Shore	TSS1500;TSS1500	0.505865	0.439023	0.471006	0.430576	0.472305	0.308128	0.412988	0.381412	0.427663	0.210154	0.225057	0.400219	0.292791	0.475783	0.313998	0.385654	0.325279	0.328617
cg10504545	ABCD4	Island	TSS200;TSS200	0.0367544	0.0316358	0.0362046	0.0435686	0.028593	0.0279521	0.0216439	0.0320859	0.0323048	0.0173345	0.0382006	0.0396091	0.0276812	0.0453074	0.0384813	0.0219494	0.0381486	0.033339
cg11421025	ABCD4	S_Shore	TSS1500;TSS1500	0.972307	0.956605	0.956065	0.956684	0.964332	0.967006	0.961928	0.943007	0.959742	0.944245	0.958969	0.964898	0.958196	0.955713	0.965566	0.97402	0.944358	0.958246
cg19021355	ABCD4	S_Shore	TSS1500;TSS1500	0.922178	0.943104	0.925435	0.93733	0.921204	0.938435	0.934675	0.933692	0.932007	0.92266	0.938871	0.927495	0.932853	0.910037	0.928298	0.942731	0.940553	0.930437
cg21520131	ABCD4	S_Shore	TSS200;TSS200	0.035385	0.0335155	0.0424305	0.0477424	0.0383476	0.0281634	0.0368128	0.0332064	0.0369504	0.0322462	0.0328835	0.029552	0.0506833	0.0484385	0.0312955	0.0285563	0.0342854	0.0359926
cg25271364	ABCD4	Island	TSS200;TSS200	0.0238551	0.0224189	0.0215389	0.0253517	0.0262008	0.0247273	0.023847	0.0230323	0.0238715	0.0247401	0.025105	0.0233072	0.0252403	0.0321011	0.0226997	0.0176865	0.0228129	0.0242116
	ABCD4											0.457221									0.433877
cg00375964	ABCE1	N_Shore	TSS200;5'UTR;TSS200	0.0211417	0.0319504	0.0287368	0.0300244	0.029167	0.0277869	0.0264811	0.0280536	0.0279177	0.0290329	0.0216697	0.0254148	0.0310263	0.0379169	0.027102	0.0241895	0.0241022	0.0275568
cg01013312	ABCE1	N_Shore	TSS200;5'UTR;TSS200	0.0405972	0.0365357	0.038118	0.0397424	0.0358387	0.0366596	0.0378254	0.0370265	0.0377929	0.0245067	0.0377847	0.040889	0.0465243	0.0414858	0.0355576	0.0364778	0.0362618	0.037436
cg06070643	ABCE1	S_Shore	5'UTR;5'UTR;TSS1500;TSS1500;TSS1500;TSS1500;TSS1500;TSS1500;TSS1500;TSS1500;TSS200	0.0253428	0.0191146	0.0185927	0.0217127	0.0248008	0.0191892	0.0167114	0.0154362	0.0201125	0.0164171	0.0160549	0.0156476	0.016274	0.0275898	0.0174621	0.0178237	0.0185042	0.0182217
cg09206211	ABCE1	Island	5'UTR;5'UTR;TSS1500;TSS1500;TSS1500;TSS1500;TSS1500;TSS1500;TSS1500;TSS1500;TSS200	0.0358648	0.0257296	0.0278985	0.0404724	0.0345828	0.0341452	0.0373601	0.0270701	0.0328904	0.0525018	0.0247248	0.0324527	0.0428669	0.0520624	0.0305072	0.0281357	0.0313776	0.0368286
cg09504398	ABCE1	N_Shore	TSS200;5'UTR;TSS200	0.0216459	0.0269953	0.0242899	0.029011	0.0250164	0.0277854	0.0219266	0.0234479	0.0250148	0.0275156	0.0281044	0.0226379	0.0479221	0.036995	0.0228459	0.0199977	0.0224854	0.028563
cg12252587	ABCE1	S_Shore	5'UTR;5'UTR;TSS1500;TSS1500;TSS1500;TSS1500;TSS1500;TSS1500;TSS1500;TSS1500;TSS1500	0.0341736	0.0442559	0.0375249	0.0304807	0.0393348	0.0399205	0.0327716	0.0345548	0.0366271	0.0430807	0.0397945	0.0394027	0.0419761	0.0559057	0.0383194	0.026147	0.0359016	0.040066
cg13906530	ABCE1	S_Shore	5'UTR;5'UTR;TSS1500;TSS1500;TSS1500;TSS1500;TSS1500;TSS1500;TSS1500;TSS1500;TSS1500	0.0233917	0.0244668	0.0192619	0.0236479	0.0236829	0.0190832	0.0181241	0.0188785	0.0213171	0.0195523	0.0192927	0.0223218	0.0288024	0.0348084	0.0237874	0.0234266	0.0212556	0.0241559
cg15595551	ABCE1	N_Shore	TSS200;5'UTR;TSS200	0.0245957	0.0238663	0.0195761	0.0278969	0.0272384	0.0243535	0.0210869	0.0257807	0.0242993	0.0192549	0.0213496	0.0254008	0.042306	0.0376765	0.0227165	0.0170264	0.0197243	0.0256819
cg19873731	ABCE1	Island	5'UTR;5'UTR;TSS1500;TSS1500;TSS1500;TSS1500;TSS1500;TSS1500;TSS1500;TSS1500;TSS200	0.0129857	0.0194041	0.0150487	0.0167195	0.0159341	0.0166048	0.0126616	0.0158882	0.0156558	0.01594	0.0163772	0.0182058	0.0182654	0.0256262	0.0170873	0.0119545	0.0171372	0.0175742
cg20439103	ABCE1	S_Shore	5'UTR;5'UTR;TSS1500;TSS1500;TSS1500;TSS1500;TSS1500;TSS1500;TSS1500;TSS1500;TSS1500	0.252402	0.22128	0.182003	0.190865	0.272818	0.164953	0.273029	0.232958	0.223789	0.240085	0.267974	0.216478	0.191719	0.277637	0.146378	0.214858	0.206786	0.220239
cg21012515	ABCE1	Island	5'UTR;5'UTR;TSS1500;TSS1500;TSS1500;TSS1500;TSS1500;TSS1500;TSS1500;TSS1500;TSS200	0.0113188	0.0122512	0.00827353	0.0120745	0.0116385	0.00922018	0.00980213	0.011437	0.010752	0.0131256	0.0120466	0.0110662	0.0117142	0.0182431	0.0114152	0.00840669	0.0108936	0.0121139
cg21253282	ABCE1	N_Shore	TSS200;5'UTR;TSS200	0.0245433	0.0237463	0.0243875	0.0315224	0.0250871	0.0259901	0.024882	0.0238522	0.0255014	0.0246192	0.0216109	0.0304401	0.0288142	0.0405276	0.0222056	0.0156278	0.0225407	0.0257983
cg25473593	ABCE1	S_Shore	5'UTR;5'UTR;TSS1500;TSS1500;TSS1500;TSS1500;TSS1500;TSS1500;TSS1500;TSS1500;TSS1500	0.0211096	0.0267686	0.0297818	0.0274057	0.0226299	0.0164039	0.0219167	0.0187597	0.023097	0.025645	0.0209497	0.0185436	0.0373509	0.0384329	0.0232022	0.020446	0.0206611	0.0256539
cg26283371	ABCE1	N_Shore	TSS200;5'UTR;TSS200	0.0306357	0.0330536	0.0362522	0.0447886	0.0355582	0.0301949	0.0307789	0.032415	0.0342096	0.0324166	0.0312334	0.0307345	0.0296149	0.0487202	0.036846	0.0239277	0.0261806	0.0324592
	ABCE1											0.0399269									0.040882
cg00522328	ABCF1	N_Shore	TSS1500;TSS1500	0.0408985	0.0501923	0.0570334	0.0525098	0.0563074	0.0364143	0.0362733	0.041445	0.0463843	0.0305821	0.0452509	0.0505656	0.0406707	0.0603322	0.0468168	0.0368018	0.0465583	0.0446973
cg00599401	ABCF1	Island	TSS200;TSS200	0.0185294	0.0281405	0.02391	0.0352583	0.0263089	0.0296718	0.0240237	0.0203824	0.0257781	0.0274345	0.0210143	0.0208596	0.0213357	0.0408241	0.02789	0.0208531	0.0198684	0.02501
cg00678158	ABCF1	N_Shore	TSS1500;TSS1500	0.0997585	0.072241	0.088749	0.0861103	0.0995765	0.113281	0.0694541	0.0821246	0.0889119	0.113593	0.0874407	0.0841604	0.0706279	0.0872428	0.113059	0.0708699	0.0798728	0.0883583
cg02197677	ABCF1	Island	TSS200;TSS200	0.0167423	0.0148748	0.0170034	0.0174491	0.0154765	0.0150894	0.0140173	0.0147615	0.0156768	0.0133151	0.0156796	0.0172136	0.0176639	0.018728	0.015876	0.0140127	0.0166341	0.0161404
cg03020891	ABCF1	N_Shore	TSS1500;TSS1500	0.613261	0.657907	0.684789	0.699019	0.695346	0.439095	0.709276	0.729656	0.653544	0.838034	0.512878	0.5463	0.444325	0.687036	0.486005	0.621605	0.618952	0.594392
cg04714201	ABCF1	Island	TSS200;TSS200	0.0472233	0.037902	0.026879	0.0347367	0.0447836	0.0335163	0.0416817	0.034165	0.037611	0.0499846	0.0292666	0.0379891	0.0504532	0.0573498	0.0404604	0.0424903	0.0390325	0.0433783
cg05385119	ABCF1	Island	TSS200;TSS200	0.0232962	0.0266242	0.0251317	0.0244942	0.0265341	0.0270303	0.0193934	0.0261585	0.0248328	0.0178673	0.0277751	0.0278604	0.0226784	0.0289435	0.0322559	0.0200193	0.0305511	0.0259939
cg06241803	ABCF1	Island	TSS200;TSS200	0.0641165	0.0273335	0.0328626	0.0359683	0.0375572	0.0262606	0.0255855	0.022467	0.0340189	0.0374057	0.0232608	0.0271679	0.0590095	0.0481116	0.0348289	0.0201672	0.0283958	0.0347934
cg07657521	ABCF1	Island	TSS200;TSS200	0.00942949	0.0127374	0.0107861	0.0114197	0.0101153	0.0124795	0.0104318	0.0108239	0.0110279	0.0101388	0.010049	0.0106069	0.0119303	0.0156042	0.00913273	0.00985586	0.0110445	0.0110453
cg08805748	ABCF1	N_Shore	TSS1500;TSS1500	0.0675476	0.108316	0.063254	0.135106	0.136125	0.103357	0.124105	0.117185	0.106874	0.446318	0.0817995	0.120777	0.112776	0.111993	0.0511069	0.0775075	0.0863839	0.136083
cg12495593	ABCF1	Island	TSS200;TSS200	0.0208177	0.0184395	0.0222801	0.0210751	0.0217547	0.0189734	0.0184043	0.0196979	0.0201803	0.0151466	0.0207038	0.0198119	0.0211479	0.0234576	0.0194188	0.0150278	0.0201319	0.0193558
cg13099117	ABCF1	N_Shore	TSS1500;TSS1500	0.0707781	0.0448609	0.0627443	0.0543762	0.0598508	0.0677919	0.0563051	0.0491594	0.0582333	0.211114	0.0501821	0.0609214	0.0699853	0.0568717	0.0667508	0.0526778	0.0495122	0.0772519
cg14141448	ABCF1	N_Shore	TSS1500;TSS1500	0.0876072	0.0506945	0.0593531	0.0819634	0.0944171	0.0546251	0.0778473	0.0487897	0.0694122	0.197671	0.0409465	0.0574987	0.064298	0.0642478	0.0705461	0.0631417	0.0412337	0.0749479
cg14793544	ABCF1	N_Shore	TSS1500;TSS1500	0.0482959	0.0579279	0.0560544	0.0563246	0.0579095	0.0635971	0.061012	0.051811	0.0566166	0.0727897	0.0593853	0.0530691	0.0567012	0.0692278	0.0466312	0.0407193	0.0521758	0.0563374
cg16792604	ABCF1	Island	TSS200;TSS200	0.0108416	0.0136887	0.0105482	0.00923565	0.0100521	0.00845964	0.00883261	0.00937889	0.0101297	0.0125599	0.0110173	0.0111751	0.013212	0.0140009	0.0111169	0.00862124	0.0118045	0.0116885
cg17365962	ABCF1	N_Shore	TSS1500;TSS1500	0.0287025	0.0297999	0.0217835	0.0345773	0.0288119	0.0295015	0.0237448	0.0209989	0.02724	0.0382882	0.0217062	0.0288152	0.0603208	0.0369717	0.033254	0.0205988	0.0250684	0.0331279
cg17753711	ABCF1	Island	TSS200;TSS200	0.0255479	0.020959	0.0202889	0.0202409	0.023116	0.0195966	0.0307124	0.01956	0.0225027	0.0161621	0.0201364	0.019624	0.023033	0.0231292	0.0207926	0.0185712	0.0189195	0.020046
cg18015044	ABCF1	N_Shore	TSS1500;TSS1500	0.0859658	0.0751708	0.0664841	0.0795731	0.0698064	0.0818459	0.0975865	0.0774909	0.0792404	0.0709806	0.0766347	0.0583569	0.107816	0.0930943	0.0705723	0.0763655	0.0548645	0.0760856
cg21227785	ABCF1	Island	TSS200;TSS200	0.130906	0.0735328	0.0679122	0.112941	0.0940718	0.0736821	0.0756916	0.0638114	0.0865686	0.093115	0.0714774	0.0707319	0.113908	0.115575	0.0991958	0.0705485	0.0762767	0.0888535
cg23657870	ABCF1	Island	TSS200;TSS200	0.0146808	0.0170804	0.0159923	0.0147698	0.0148192	0.0158314	0.0132018	0.0164919	0.0153585	0.0120946	0.0181463	0.0162224	0.0167163	0.0170721	0.0161453	0.0139839	0.015482	0.0157329
cg24297727	ABCF1	N_Shore	TSS1500;TSS1500	0.108645	0.0567414	0.0690107	0.100286	0.111257	0.0552419	0.0618942	0.0529811	0.0770072	0.165126	0.0442625	0.0579465	0.0534236	0.0790469	0.0721506	0.0448574	0.0453652	0.0702723
cg24946044	ABCF1	N_Shore	TSS1500;TSS1500	0.0339286	0.0289871	0.0324483	0.0324238	0.0260555	0.0244989	0.0238852	0.0305738	0.0291002	0.0651518	0.0174362	0.0270842	0.0375848	0.0319137	0.0305469	0.0230595	0.0388102	0.0339484
cg26484464	ABCF1	N_Shore	TSS1500;TSS1500	0.655855	0.727773	0.6767	0.735761	0.790498	0.745022	0.698189	0.766621	0.724552	0.84669	0.743921	0.688051	0.751665	0.666355	0.658261	0.707353	0.723238	0.723192
	ABCF1											0.100904									0.100901
cg02148324	ABCF2	S_Shore	TSS1500;TSS1500	0.376776	0.475098	0.401212	0.514942	0.487731	0.298101	0.427289	0.382356	0.420438	0.252833	0.264013	0.282165	0.205106	0.517594	0.250535	0.327535	0.438239	0.317252
cg03040746	ABCF2	Island	TSS200;TSS200	0.0197056	0.0233667	0.0185983	0.0271284	0.0212047	0.0219645	0.0196865	0.0236825	0.0219171	0.0155571	0.0243221	0.0251146	0.0220001	0.0297801	0.0243648	0.0186728	0.0198561	0.0224585
cg03413475	ABCF2	S_Shore	TSS1500;TSS1500	0.1527	0.126887	0.163748	0.100148	0.151732	0.154089	0.198569	0.13497	0.147855	0.184604	0.0989006	0.140224	0.0804501	0.175373	0.103985	0.0945487	0.152453	0.128817
cg06097977	ABCF2	Island	TSS200;TSS200	0.0692617	0.050439	0.0496814	0.0596236	0.0440028	0.0474445	0.0445614	0.0305563	0.0494463	0.0894435	0.0288798	0.0370109	0.069019	0.0682267	0.0514028	0.0455978	0.0352807	0.0531076
cg06386408	ABCF2	Island	TSS200;TSS200	0.00992498	0.0122208	0.0114267	0.0135291	0.0119524	0.0096832	0.00722414	0.0101615	0.0107654	0.0107768	0.0107727	0.0100217	0.011091	0.0173576	0.00928287	0.00642301	0.00970681	0.0106791
cg07038617	ABCF2	Island	TSS200;TSS200	0.0632556	0.0399322	0.0302983	0.0569656	0.0407751	0.0477995	0.0419955	0.0301921	0.0439017	0.0620814	0.0411495	0.040581	0.0370106	0.0779983	0.0582799	0.0446351	0.0353428	0.0496348
cg10436877	ABCF2	Island	TSS200;TSS200	0.234926	0.242545	0.213135	0.220804	0.277993	0.268766	0.262004	0.287698	0.250984	0.200798	0.361952	0.298895	0.299659	0.216771	0.176712	0.317639	0.271178	0.26795
cg11309874	ABCF2	S_Shore	TSS1500;TSS1500	0.852824	0.862944	0.822618	0.828445	0.882448	0.740231	0.832196	0.881739	0.837931	0.871107	0.831489	0.835822	0.735723	0.827225	0.626392	0.807933	0.787604	0.790412
cg11451230	ABCF2	Island	TSS200;TSS200	0.0290036	0.0344557	0.0438716	0.0406658	0.0336537	0.0304259	0.0440633	0.0254536	0.0351992	0.0561007	0.029111	0.0395549	0.0577622	0.0718673	0.0434773	0.022589	0.0343088	0.0443464
cg16728606	ABCF2	S_Shore	TSS200;TSS200	0.0155459	0.0204606	0.0253846	0.0232022	0.0183108	0.0163542	0.0175481	0.0157269	0.0190667	0.0275222	0.0148735	0.0178046	0.0307797	0.0238605	0.0181105	0.014868	0.0175534	0.0206716
cg17541425	ABCF2	Island	TSS200;TSS200	0.0402587	0.0393013	0.0342013	0.0440285	0.0363083	0.0349549	0.0319408	0.0250085	0.0357503	0.040837	0.0243615	0.0331483	0.056919	0.0532864	0.0485143	0.0299135	0.0283997	0.0394225
cg17825100	ABCF2	Island	TSS200;TSS200	0.032799	0.0237991	0.025928	0.0310265	0.0361939	0.0280985	0.0280122	0.0243052	0.0287703	0.0591083	0.0185219	0.0322006	0.0462579	0.0389852	0.0341862	0.0245504	0.0173917	0.0339003
cg19529696	ABCF2	Island	TSS200;TSS200	0.015288	0.0158928	0.0157486	0.0164304	0.017616	0.0155545	0.0139247	0.0148614	0.0156645	0.0116451	0.0176254	0.0187372	0.0158902	0.0218927	0.0166013	0.0170474	0.0146968	0.016767
cg25384740	ABCF2	S_Shore	TSS1500;TSS1500	0.0271045	0.0223905	0.0211138	0.0344547	0.0260203	0.0217942	0.0196153	0.0232765	0.0244712	0.031928	0.0218953	0.0189994	0.02707	0.0309519	0.0243376	0.0152599	0.0206199	0.0238827
cg26105143	ABCF2	S_Shore	TSS1500;TSS1500	0.924074	0.932346	0.921683	0.931081	0.932277	0.942932	0.933885	0.942663	0.932618	0.904725	0.914889	0.90921	0.905982	0.902363	0.836185	0.938901	0.926571	0.904853
cg26496603	ABCF2	Island	TSS200;TSS200	0.0248779	0.0271451	0.0229957	0.0588811	0.0230306	0.026004	0.0219455	0.0241002	0.0286225	0.0299727	0.0181708	0.0251563	0.0342619	0.0498035	0.0205959	0.0298262	0.0231636	0.0288689
cg26846960	ABCF2	S_Shore	TSS200;TSS200	0.00937885	0.0113643	0.00905143	0.0146605	0.0111346	0.0103683	0.0114451	0.00984306	0.0109058	0.0136453	0.0105458	0.0102712	0.0185767	0.0182123	0.00915114	0.00742603	0.00942917	0.0121572
	ABCF2											0.17143									0.162658
cg05629195	ABCF3	N_Shore	TSS1500	0.806504	0.903513	0.796024	0.857631	0.863905	0.866713	0.810955	0.830098	0.841918	0.892725	0.79742	0.824652	0.708868	0.829384	0.750364	0.79967	0.846935	0.806252
cg06686306	ABCF3	Island	TSS200	0.011713	0.0167769	0.0105562	0.0124998	0.0113137	0.00891819	0.00994913	0.0118329	0.011695	0.0151227	0.00999523	0.0115128	0.0125373	0.0221722	0.0121736	0.00734474	0.0104649	0.0126654
cg08503002	ABCF3	Island	TSS200	0.0967748	0.0851123	0.0514195	0.0599632	0.0453746	0.0468098	0.0724465	0.0402186	0.0622649	0.178757	0.0467236	0.0571881	0.133986	0.136051	0.0572415	0.050052	0.0526908	0.0890862
cg09866366	ABCF3	N_Shore	TSS1500	0.241387	0.411056	0.404656	0.451401	0.401902	0.269515	0.285953	0.467008	0.36661	0.633605	0.168292	0.296988	0.112263	0.317748	0.170693	0.133428	0.340729	0.271718
cg11908737	ABCF3	N_Shore	TSS1500	0.944349	0.948992	0.947387	0.927007	0.935927	0.939022	0.952772	0.942515	0.942246	0.939208	0.937193	0.940782	0.939268	0.945735	0.926177	0.934748	0.945011	0.938515
cg13461600	ABCF3	Island	TSS1500	0.0481495	0.0435822	0.0481176	0.0520248	0.0345779	0.0329444	0.0311714	0.0288195	0.0399234	0.0911523	0.0277351	0.0347107	0.067642	0.0673674	0.066709	0.024113	0.0299519	0.0511727
cg13465462	ABCF3	Island	TSS200	0.0393724	0.0527057	0.0352925	0.0462901	0.0490287	0.0368936	0.0540972	0.0242639	0.042243	0.072313	0.0292607	0.0416405	0.0817449	0.0822343	0.0469241	0.0368206	0.0359011	0.0533549
cg13491563	ABCF3	N_Shore	TSS1500	0.60653	0.642064	0.597276	0.612654	0.606924	0.337024	0.531761	0.602865	0.567137	0.786078	0.242387	0.432615	0.294295	0.464118	0.268997	0.220664	0.514442	0.40295
cg22469836	ABCF3	Island	TSS200	0.017617	0.0194461	0.0206849	0.040817	0.0196015	0.0176092	0.0216029	0.0180228	0.0219252	0.037364	0.0156914	0.0224135	0.0286182	0.0332381	0.0217805	0.0126454	0.0199887	0.0239675
cg22861990	ABCF3	Island	TSS1500	0.0398099	0.026459	0.0288613	0.0317197	0.0329918	0.0212568	0.0279925	0.0153245	0.0280519	0.118806	0.0178463	0.0310827	0.0357149	0.0766485	0.0277755	0.0372919	0.0245384	0.046213
cg27220130	ABCF3	Island	TSS200	0.010425	0.0145387	0.0113899	0.0137042	0.0121076	0.0126687	0.00943071	0.0129761	0.0121551	0.0129319	0.012191	0.0103751	0.0132112	0.0199386	0.0121848	0.00876735	0.0121175	0.0127147
	ABCF3											0.266925									0.246237
cg02241241	ABCG1	Island	TSS1500;TSS200;5'UTR;Body;Body;TSS200	0.026516	0.032127	0.027562	0.0525318	0.0379087	0.0370402	0.0286191	0.0190929	0.0326747	0.0759485	0.0236953	0.019009	0.0469972	0.0618969	0.0299545	0.0169916	0.0265513	0.0376305
cg02316713	ABCG1		TSS1500;TSS1500	0.752503	0.773789	0.552224	0.712387	0.751795	0.803196	0.694763	0.711158	0.718977	0.812387	0.857765	0.797841	0.691262	0.791138	0.67188	0.795348	0.752839	0.771307
cg02473680	ABCG1	Island	TSS1500;TSS200;5'UTR;Body;Body;TSS200	0.0178364	0.0217128	0.0222151	0.0317467	0.0416831	0.0243989	0.016475	0.0187196	0.0243485	0.054546	0.0200814	0.0207784	0.115299	0.0590006	0.020291	0.0186721	0.0220204	0.0413361
cg02785735	ABCG1		TSS1500;TSS1500	0.94896	0.939746	0.942369	0.951768	0.925814	0.949469	0.939439	0.949496	0.943383	0.949784	0.946483	0.94994	0.946432	0.949277	0.861146	0.952135	0.954519	0.938715
cg05046272	ABCG1		TSS1500;TSS1500	0.701256	0.810738	0.789103	0.831071	0.809834	0.763089	0.698085	0.743506	0.768335	0.667842	0.769305	0.660913	0.762588	0.824577	0.828382	0.816991	0.812097	0.767837
cg05441651	ABCG1	Island	TSS1500;TSS1500;5'UTR;Body;Body;TSS1500	0.0362679	0.0275093	0.0217505	0.0302385	0.0259019	0.0147558	0.0259775	0.0169941	0.0249244	0.0982373	0.0215787	0.0222496	0.101157	0.0923762	0.0262047	0.027524	0.020738	0.0512582
cg06030219	ABCG1	Island	TSS1500;TSS200;5'UTR;Body;Body;TSS200	0.0191263	0.0223229	0.0226868	0.0189104	0.0197406	0.0152452	0.0142953	0.0197982	0.0190157	0.0147018	0.0187656	0.01818	0.0186079	0.0211298	0.0182884	0.0154666	0.0191387	0.0180349
cg07875759	ABCG1	Island	TSS1500;TSS200;5'UTR;Body;Body;TSS200	0.0328641	0.0359435	0.0318332	0.0457756	0.033729	0.0380574	0.0231766	0.0287147	0.0337618	0.0368459	0.0291416	0.0329151	0.0380849	0.0517255	0.033362	0.0209178	0.0343786	0.0346714
cg08841829	ABCG1	N_Shore	TSS1500;TSS1500;5'UTR;Body;Body;TSS1500	0.0495139	0.0563963	0.054256	0.0847739	0.0594067	0.0811011	0.0482953	0.0449237	0.0598334	0.0256625	0.0500962	0.0398292	0.136434	0.135934	0.0480525	0.0378201	0.0473253	0.0651442
cg11813473	ABCG1		TSS1500;TSS1500	0.852981	0.875514	0.810848	0.864257	0.883284	0.882418	0.852749	0.873068	0.86189	0.839957	0.868812	0.863891	0.83884	0.875902	0.804856	0.904929	0.87247	0.858707
cg15319517	ABCG1	Island	TSS1500;TSS1500;5'UTR;Body;Body;TSS1500	0.0288677	0.048029	0.0277315	0.0435815	0.0440446	0.0290597	0.0332707	0.0276584	0.0352804	0.0932799	0.0413082	0.0249675	0.173088	0.0964356	0.0393882	0.0222211	0.0260183	0.0645884
cg20214535	ABCG1		TSS1500;TSS1500	0.601614	0.613894	0.639663	0.628004	0.58827	0.715632	0.607012	0.673864	0.633494	0.848231	0.795757	0.698158	0.609804	0.611977	0.685347	0.693727	0.640782	0.697973
cg26767954	ABCG1	Island	TSS1500;TSS1500;5'UTR;Body;Body;TSS1500	0.0288954	0.0523273	0.0289252	0.0625147	0.104747	0.0244605	0.0499077	0.0314126	0.0478988	0.0365636	0.0401863	0.0244709	0.149534	0.143227	0.0487844	0.0400213	0.0332575	0.0645056
cg26768067	ABCG1	Island	TSS1500;TSS200;5'UTR;Body;Body;TSS200	0.0186342	0.0199884	0.0232995	0.0193885	0.021205	0.0196562	0.0202603	0.0193176	0.0202187	0.0152973	0.0192447	0.0208616	0.0210506	0.0243764	0.0198766	0.0149204	0.0185393	0.0192709
	ABCG1											0.301717									0.316499
cg01263075	ABCG2	Island	TSS200	0.0745328	0.082203	0.0331597	0.0887701	0.0795169	0.0534008	0.0461455	0.0656616	0.0654238	0.42054	0.458718	0.0542292	0.227841	0.128078	0.377661	0.0543648	0.0441878	0.220702
cg01594388	ABCG2		TSS1500	0.546622	0.694703	0.579701	0.676853	0.713108	0.581562	0.545136	0.607261	0.618118	0.502622	0.625794	0.526057	0.67267	0.655225	0.686035	0.674045	0.668429	0.62636
cg02196227	ABCG2	Island	TSS1500	0.0791581	0.0803696	0.051311	0.0826995	0.0874778	0.0635242	0.0688683	0.0453591	0.0698459	0.384137	0.434572	0.0524535	0.206569	0.0891957	0.33528	0.0768962	0.0450966	0.203025
cg03415858	ABCG2	Island	TSS200	0.0179615	0.0183116	0.0158775	0.0182022	0.0190119	0.0160534	0.014011	0.0171147	0.017068	0.0176454	0.266669	0.0164326	0.0175638	0.0282788	0.281389	0.0133223	0.0175688	0.0823587
cg04265436	ABCG2		TSS200	0.62853	0.52158	0.597785	0.563623	0.576395	0.797349	0.569017	0.52163	0.596989	0.82641	0.566811	0.639655	0.831872	0.520174	0.652926	0.665468	0.4982	0.650189
cg05454547	ABCG2		TSS1500	0.559568	0.744986	0.644091	0.638132	0.641855	0.812639	0.571241	0.648312	0.657603	0.737657	0.702854	0.692014	0.767843	0.558862	0.773688	0.627416	0.705818	0.695769
cg07292612	ABCG2		TSS200	0.422185	0.569552	0.556687	0.570707	0.469233	0.726949	0.540275	0.589785	0.555672	0.795416	0.617924	0.54346	0.78683	0.481961	0.61236	0.571121	0.569038	0.622264
cg11000292	ABCG2	Island	TSS1500	0.0939655	0.142952	0.0377176	0.127008	0.151966	0.0967596	0.0677453	0.0793395	0.0996817	0.283919	0.420219	0.027206	0.218456	0.118137	0.293997	0.169039	0.0570238	0.1985
cg16432182	ABCG2		TSS200	0.500844	0.499345	0.557943	0.548399	0.487137	0.72291	0.526708	0.606386	0.556209	0.825976	0.611804	0.579501	0.820239	0.483069	0.648767	0.54749	0.509171	0.628252
cg20558008	ABCG2		TSS1500	0.665287	0.785302	0.824617	0.790849	0.736613	0.812254	0.800194	0.773361	0.77356	0.810574	0.791163	0.70183	0.77296	0.721244	0.7962	0.762964	0.778382	0.766915
cg23118773	ABCG2		TSS1500	0.2568	0.415171	0.352102	0.371583	0.366279	0.71252	0.336376	0.37168	0.397814	0.679993	0.50688	0.402427	0.621906	0.272824	0.410035	0.45925	0.369394	0.465339
cg24352530	ABCG2	Island	TSS1500	0.327696	0.497823	0.291856	0.497836	0.484194	0.444695	0.2611	0.387864	0.399133	0.491723	0.560718	0.158803	0.415221	0.35552	0.391338	0.508391	0.274981	0.394587
cg25102622	ABCG2		TSS200	0.549979	0.48894	0.455691	0.506964	0.44887	0.810145	0.493722	0.511151	0.533183	0.534801	0.531726	0.639628	0.743276	0.486609	0.696909	0.669131	0.517744	0.602478
cg25295218	ABCG2	Island	TSS200	0.0267044	0.0195588	0.0207943	0.0247136	0.0209537	0.0248781	0.0143357	0.0181069	0.0212557	0.319856	0.538108	0.021179	0.088196	0.040156	0.442067	0.0191097	0.0170129	0.185711
cg26489994	ABCG2	Island	TSS200	0.0941943	0.0492317	0.0197459	0.045297	0.071343	0.0149896	0.0194128	0.0293482	0.0429453	0.52022	0.603027	0.0237355	0.177397	0.126962	0.598819	0.0238582	0.0259685	0.262498
	ABCG2											0.3603									0.44033
cg03222066	ABCG4	N_Shore	TSS1500;TSS1500	0.466653	0.542475	0.441723	0.487478	0.482846	0.642657	0.466837	0.522392	0.506633	0.679706	0.615503	0.522087	0.615602	0.438798	0.563809	0.491768	0.505473	0.554093
cg03904291	ABCG4	N_Shore	TSS1500;TSS1500	0.664413	0.80803	0.685485	0.768605	0.707858	0.841907	0.69009	0.781121	0.743439	0.870038	0.83384	0.799658	0.791519	0.641273	0.780925	0.748528	0.765776	0.778945
cg08542973	ABCG4	N_Shore	TSS1500;TSS1500	0.531588	0.532603	0.497324	0.533008	0.546441	0.53045	0.528168	0.476366	0.521993	0.475536	0.490907	0.434354	0.443075	0.570709	0.509026	0.495245	0.531053	0.493738
cg16772377	ABCG4	N_Shore	TSS1500;TSS1500	0.324184	0.276919	0.326671	0.341038	0.316866	0.686934	0.30156	0.307217	0.360174	0.571215	0.58475	0.369199	0.380307	0.400509	0.489408	0.430121	0.397349	0.452857
cg22138302	ABCG4	N_Shore	TSS1500;TSS1500	0.457682	0.603307	0.461695	0.588958	0.506938	0.684969	0.50187	0.551809	0.544653	0.682061	0.661391	0.462512	0.638509	0.455506	0.53593	0.53657	0.560341	0.566603
	ABCG4											0.535378									0.569247
cg03157395	ABCG8		TSS200;TSS200	0.547152	0.627686	0.662772	0.621479	0.594445	0.677789	0.574427	0.663181	0.621116	0.633283	0.641431	0.622506	0.583374	0.546117	0.578292	0.605304	0.634392	0.605587
cg05523680	ABCG8		TSS200;TSS200	0.650802	0.681488	0.731715	0.696066	0.688551	0.707316	0.632928	0.748316	0.692148	0.777745	0.703905	0.736383	0.710996	0.667947	0.654164	0.684405	0.716259	0.706475
cg05864261	ABCG8		TSS200;TSS200	0.321903	0.32947	0.343659	0.315766	0.304655	0.41746	0.285612	0.338742	0.332158	0.38369	0.382409	0.26641	0.334066	0.311905	0.271137	0.310066	0.330473	0.323769
cg13486675	ABCG8		TSS200;TSS200	0.487134	0.532028	0.508261	0.504917	0.494186	0.552685	0.492922	0.543921	0.514507	0.593787	0.54711	0.486873	0.564695	0.575031	0.517236	0.503287	0.555665	0.542961
cg25781162	ABCG8		TSS200;TSS200	0.70516	0.69872	0.778785	0.71768	0.711066	0.73462	0.685348	0.810942	0.73029	0.785113	0.740839	0.765363	0.795203	0.695299	0.704962	0.708697	0.757792	0.744158
	ABCG8											0.578044									0.58459
cg00216116	ABHD1	Island	TSS200	0.213491	0.16433	0.181037	0.226973	0.189914	0.138197	0.140364	0.117964	0.171534	0.103532	0.200037	0.172837	0.226366	0.269826	0.201378	0.181156	0.137053	0.186523
cg07201791	ABHD1	N_Shore	TSS1500	0.676118	0.746037	0.701408	0.685867	0.725883	0.79795	0.745369	0.728047	0.725835	0.810466	0.746963	0.670405	0.731995	0.666984	0.699303	0.694515	0.723079	0.717964
cg11845159	ABHD1	Island	TSS200	0.00722038	0.01298	0.00716717	0.00969716	0.00811249	0.00735334	0.00709386	0.00708408	0.00833856	0.00829051	0.0075926	0.00823752	0.0096506	0.01331	0.00773954	0.00663188	0.00748645	0.00861739
cg18053225	ABHD1	Island	TSS200	0.00844305	0.0107441	0.0100964	0.010071	0.0100478	0.00851701	0.0084912	0.00959648	0.00950088	0.0143127	0.00831314	0.00987316	0.010603	0.0142533	0.00948984	0.00683124	0.00888072	0.0103196
cg20353465	ABHD1	Island	TSS200	0.0319794	0.0287324	0.0246404	0.0229592	0.0228924	0.0202975	0.0261559	0.0230785	0.025092	0.0343849	0.0275049	0.0220431	0.041965	0.0416647	0.028541	0.0307474	0.026464	0.0316644
cg21025280	ABHD1	Island	TSS1500	0.0563335	0.0516017	0.0527617	0.0505391	0.0582901	0.0615693	0.0513346	0.0586262	0.055132	0.116281	0.0606383	0.0550035	0.0572951	0.0578118	0.0546914	0.0495	0.0395011	0.0613403
cg21468035	ABHD1	N_Shore	TSS1500	0.845101	0.878654	0.766695	0.879582	0.852598	0.888008	0.876914	0.902488	0.861255	0.700185	0.772523	0.834309	0.7774	0.834445	0.75542	0.838386	0.866313	0.797373
cg25101396	ABHD1	N_Shore	TSS1500	0.450844	0.512571	0.41851	0.466332	0.47527	0.37612	0.534215	0.476213	0.463759	0.84595	0.693801	0.529291	0.61343	0.434502	0.589818	0.687187	0.458554	0.606567
cg26945050	ABHD1	Island	TSS1500	0.0389435	0.0294023	0.0347956	0.0405321	0.0425748	0.0368751	0.0297409	0.0305549	0.0354274	0.0332642	0.0355616	0.0406639	0.0351085	0.0380715	0.0344469	0.027102	0.0339742	0.0347741
	ABHD1											0.261764									0.272794
cg00569620	ABHD10	N_Shore	TSS200	0.0375324	0.0308993	0.0305068	0.0329152	0.0278404	0.0353661	0.0274073	0.0257797	0.0310309	0.0363479	0.023153	0.0423103	0.0454112	0.0403743	0.0318309	0.0274974	0.0299696	0.0346118
cg07495858	ABHD10	N_Shore	TSS1500;TSS1500;TSS1500;TSS1500	0.832397	0.881494	0.853786	0.875097	0.895315	0.860295	0.852802	0.832813	0.8605	0.867114	0.854045	0.852308	0.848343	0.864548	0.857136	0.840677	0.877293	0.857683
cg08109969	ABHD10	Island	TSS200	0.026904	0.0216914	0.0246004	0.0266106	0.0239202	0.0204326	0.0249373	0.0239341	0.0241288	0.0163211	0.0238974	0.0223945	0.0206786	0.0306989	0.0238474	0.019967	0.0210272	0.022354
cg08979515	ABHD10	N_Shore	TSS1500	0.140846	0.0699902	0.228072	0.163231	0.157334	0.0922603	0.0554434	0.0876936	0.124359	0.0460746	0.0581819	0.0608455	0.117753	0.0949078	0.0800595	0.0811845	0.0671257	0.0757666
cg10672681	ABHD10	N_Shore	TSS1500	0.159595	0.167791	0.451267	0.278862	0.283617	0.138593	0.274565	0.280414	0.254338	0.209704	0.0866757	0.134792	0.0952493	0.20096	0.184404	0.0920666	0.176927	0.147597
cg12908055	ABHD10	N_Shore	TSS1500;TSS1500;TSS1500;TSS1500	0.6899	0.826215	0.773983	0.824574	0.775301	0.797029	0.705855	0.760393	0.769156	0.600652	0.747814	0.668643	0.701747	0.751983	0.793297	0.771642	0.808586	0.730546
cg13422008	ABHD10	Island	TSS200	0.013372	0.0244512	0.0237146	0.0252036	0.023908	0.0227536	0.017274	0.022212	0.0216111	0.0249897	0.0216548	0.0318315	0.0208205	0.0413931	0.0340328	0.0201405	0.0219072	0.0270963
cg19947061	ABHD10	N_Shore	TSS200	0.0472613	0.0504164	0.0595168	0.0567878	0.0532815	0.0438638	0.0512559	0.0453061	0.0509612	0.0768425	0.0443627	0.0474635	0.117518	0.0605701	0.0493639	0.0364533	0.0406055	0.0591474
cg20200594	ABHD10	N_Shore	TSS1500;TSS1500;TSS1500;TSS1500	0.358743	0.466911	0.693154	0.467884	0.531041	0.228268	0.542364	0.492521	0.472611	0.374059	0.207772	0.255434	0.318803	0.224693	0.268042	0.309549	0.277557	0.279489
cg22314619	ABHD10	N_Shore	TSS1500;TSS1500;TSS1500;TSS1500	0.86997	0.921036	0.891657	0.895029	0.908554	0.920342	0.933116	0.910275	0.906247	0.918086	0.898642	0.877208	0.9003	0.907801	0.891006	0.909988	0.900647	0.90046
cg22488352	ABHD10	N_Shore	TSS1500	0.137491	0.143081	0.347371	0.253859	0.289711	0.142131	0.214103	0.170339	0.212261	0.147918	0.0620067	0.0912998	0.089296	0.153401	0.166394	0.0904066	0.138211	0.117367
cg23490715	ABHD10	Island	TSS200	0.0236218	0.0260445	0.0191011	0.028209	0.01806	0.0191189	0.0237502	0.0172661	0.0218964	0.0434398	0.0168479	0.0190346	0.0731321	0.0503105	0.0196855	0.0166161	0.0219449	0.0326264
cg27279460	ABHD10	N_Shore	TSS200	0.0122551	0.0270561	0.0423751	0.0312701	0.0337962	0.0304989	0.0262963	0.0380821	0.0302037	0.018943	0.0343736	0.0326641	0.0349841	0.0417318	0.0300937	0.0320209	0.029324	0.0317669
	ABHD10											0.290716									0.255116
cg03938320	ABHD11	Island	TSS1500;TSS1500;TSS1500;TSS1500;TSS1500;TSS1500;TSS1500	0.0153674	0.0157266	0.0174129	0.0211654	0.0163237	0.0167427	0.011712	0.0158354	0.0162858	0.0149372	0.0176902	0.017797	0.0188252	0.0200358	0.0190428	0.0154231	0.0178796	0.0177039
cg11216259	ABHD11	Island	TSS200;TSS200;TSS200;TSS200;TSS200;TSS200	0.0219592	0.0244182	0.021352	0.0266133	0.0247459	0.0211703	0.0188436	0.0249369	0.0230049	0.0259087	0.023794	0.0231842	0.0335016	0.0315726	0.0221781	0.0172818	0.021592	0.0248766
cg11525834	ABHD11	Island	TSS200;TSS200;TSS200;TSS200;TSS200;TSS200;TSS200	0.0254483	0.0250228	0.0299167	0.0312033	0.00179772	0.0269424	0.0250732	0.027764	0.0241461	0.0188101	0.0282524	0.0300973	0.0226281	0.0283574	0.026916	0.0325874	0.0241168	0.0264707
cg13186527	ABHD11	Island	TSS200;TSS200;TSS200;TSS200;TSS200;TSS200	0.0104741	0.014343	0.0115358	0.0125969	0.0132792	0.00966735	0.0103926	0.0123312	0.0118275	0.0110153	0.0149669	0.0121129	0.0147098	0.0169389	0.0120159	0.00810768	0.011727	0.0126993
cg15709462	ABHD11	Island	TSS200;TSS200;TSS200;TSS200;TSS200;TSS200	0.0221791	0.0273183	0.0333526	0.0256848	0.0260692	0.0241787	0.0196509	0.0216297	0.0250079	0.0186934	0.028344	0.0267716	0.0189243	0.0330708	0.0214141	0.0140204	0.0298461	0.0238856
cg18274279	ABHD11	Island	TSS1500;TSS1500;TSS1500;TSS1500;TSS1500;TSS1500;TSS1500	0.0108344	0.0129621	0.0117527	0.0130441	0.0152133	0.0107238	0.0100447	0.0112525	0.0119784	0.0126856	0.0109901	0.0114054	0.014253	0.0216015	0.011273	0.010691	0.0104762	0.012922
cg21942546	ABHD11	S_Shore	TSS1500;TSS1500;TSS1500;TSS1500;TSS1500;TSS1500;TSS1500	0.931808	0.940153	0.944952	0.934299	0.938244	0.946837	0.939827	0.94995	0.940759	0.928762	0.947121	0.939972	0.933336	0.927412	0.947168	0.946421	0.941053	0.938906
cg27303983	ABHD11	Island	TSS200;TSS200;TSS200;TSS200;TSS200;TSS200;TSS200	0.0413843	0.0378998	0.0360259	0.0461624	0.0368877	0.044442	0.0386645	0.0349459	0.0395516	0.0227905	0.0381383	0.0356961	0.0256936	0.0372357	0.0346978	0.0569554	0.0343195	0.0356909
	ABHD11											0.13657									0.136644
cg00553605	ABHD11-AS1	N_Shelf	TSS1500	0.0513403	0.0447044	0.0401814	0.0695731	0.0433934	0.0371024	0.0466015	0.0389208	0.0464772	0.0277412	0.0450386	0.0448578	0.0457547	0.0889606	0.0300854	0.0362173	0.0533169	0.0464966
cg27647810	ABHD11-AS1		TSS1500	0.975409	0.973406	0.970053	0.971622	0.971609	0.97105	0.969948	0.967581	0.971335	0.978499	0.967296	0.964209	0.976839	0.963492	0.767243	0.981225	0.971081	0.946235
	ABHD11-AS1											0.508906									0.496366
cg01877301	ABHD12	Island	TSS1500;TSS1500	0.0253547	0.0443309	0.0265418	0.0314157	0.0209206	0.0166995	0.0300542	0.018117	0.0266793	0.0813991	0.0199355	0.0146673	0.0783945	0.0817376	0.0111319	0.013659	0.0236684	0.0405742
cg05763877	ABHD12	S_Shore	TSS1500;TSS1500	0.128521	0.107041	0.113376	0.0806635	0.0667834	0.137935	0.109039	0.0972149	0.105072	0.0725248	0.0890344	0.105595	0.12165	0.111623	0.0814203	0.0794131	0.084615	0.0932344
cg06915252	ABHD12	Island	TSS200;TSS200	0.0491449	0.0452242	0.0313901	0.0416483	0.0403522	0.0454118	0.0363455	0.0300174	0.0399418	0.0774331	0.0304201	0.04064	0.0716139	0.0741304	0.0356779	0.0418883	0.0254927	0.049662
cg17351116	ABHD12	Island	TSS1500;TSS1500	0.0915317	0.0562192	0.0565114	0.063662	0.0641905	0.0520948	0.0563694	0.0356722	0.0595314	0.079664	0.0362511	0.0868875	0.0801481	0.0921463	0.0634432	0.056159	0.0475984	0.0677872
cg19434221	ABHD12	Island	TSS1500;TSS1500	0.0176961	0.0244809	0.0183704	0.0247926	0.0287754	0.0180841	0.0201899	0.0203087	0.0215873	0.0212657	0.022271	0.017605	0.0234155	0.0330461	0.0224288	0.0197016	0.0179809	0.0222143
cg21325232	ABHD12	Island	TSS200;TSS200	0.0544312	0.0492107	0.0603971	0.0523729	0.0496553	0.0354809	0.0440713	0.0295953	0.0469018	0.0500614	0.026414	0.0420495	0.0841314	0.0837034	0.0524881	0.0326264	0.0366871	0.0510202
cg21602768	ABHD12	S_Shore	TSS1500;TSS1500	0.054429	0.0586479	0.0542131	0.0532657	0.0612215	0.0555462	0.0743655	0.0538861	0.0581969	0.0640849	0.0594046	0.0483098	0.0586744	0.0708335	0.0433975	0.0479542	0.0456015	0.0547825
	ABHD12											0.05113									0.0541821
cg07692970	ABHD12B	N_Shore	TSS1500;TSS1500	0.769576	0.812061	0.708142	0.807586	0.762257	0.801708	0.762296	0.710113	0.766717	0.631971	0.810756	0.731176	0.66258	0.835981	0.802843	0.793327	0.7912	0.757479
cg16473728	ABHD12B	N_Shore	TSS1500;TSS1500	0.678662	0.801334	0.577488	0.68618	0.738567	0.730592	0.749548	0.718542	0.710114	0.728902	0.772512	0.711689	0.568013	0.748428	0.569488	0.725231	0.717327	0.692699
cg17352004	ABHD12B	N_Shore	TSS1500;TSS1500	0.923695	0.921211	0.903728	0.926539	0.918753	0.91424	0.916615	0.912829	0.917201	0.920285	0.90653	0.897282	0.889163	0.914005	0.919176	0.926803	0.929599	0.912855
cg23734017	ABHD12B	Island	TSS200;TSS200	0.160356	0.367836	0.130313	0.361106	0.367544	0.518368	0.156674	0.393918	0.307014	0.323983	0.478516	0.383207	0.359218	0.214327	0.506694	0.461909	0.303405	0.378907
cg24562296	ABHD12B	N_Shore	TSS1500;TSS1500	0.849639	0.90337	0.791753	0.884363	0.875497	0.888191	0.860087	0.876804	0.866213	0.865384	0.918785	0.878129	0.865005	0.872793	0.842763	0.842422	0.888984	0.871783
	ABHD12B											0.713452									0.722745
cg06752231	ABHD14A	S_Shore	TSS200;TSS200;TSS1500;TSS1500;TSS1500	0.18058	0.184659	0.212518	0.193972	0.168927	0.182348	0.195076	0.146152	0.183029	0.239589	0.204209	0.159503	0.207654	0.181101	0.173655	0.134056	0.15958	0.182418
cg11491074	ABHD14A	Island	TSS200;TSS1500;TSS1500;TSS1500	0.0690664	0.0576081	0.0502204	0.062173	0.0462581	0.0714219	0.0514107	0.0373372	0.055687	0.140846	0.0541935	0.0574009	0.100558	0.0877501	0.0754209	0.0200238	0.044522	0.0725894
cg19440233	ABHD14A	Island	TSS200;TSS1500;TSS1500;TSS1500	0.020052	0.0214748	0.0283616	0.0307483	0.0248468	0.0214549	0.0397226	0.0218094	0.0260588	0.0398701	0.0253579	0.0275275	0.0290596	0.0360528	0.0240837	0.0199011	0.0224731	0.0280407
cg19902797	ABHD14A	Island	TSS200;TSS200;TSS1500;TSS1500;TSS1500	0.0315229	0.0355871	0.0290578	0.0293439	0.0301015	0.0259993	0.0205483	0.0286614	0.0288528	0.0274829	0.0283053	0.027244	0.0242944	0.0370838	0.0276731	0.0281559	0.0264205	0.0283325
cg26791985	ABHD14A	Island	TSS200;TSS1500;TSS1500;TSS1500	0.0596915	0.110077	0.0513811	0.0641866	0.0331344	0.039393	0.0566398	0.0354402	0.0562429	0.120446	0.0478216	0.0428993	0.17376	0.177796	0.0525547	0.0279074	0.055486	0.0873339
	ABHD14A											0.0699741									0.079743
cg01966966	ABHD14B	N_Shore	TSS200;TSS200;TSS1500;TSS200	0.0331853	0.0286595	0.0284506	0.0329162	0.0247347	0.0211122	0.0249444	0.0259395	0.0274928	0.0318943	0.0251343	0.0279266	0.0373016	0.0352316	0.0286748	0.0218507	0.0339163	0.0302413
cg03638479	ABHD14B	S_Shore	TSS1500;TSS1500;Body;TSS1500	0.219601	0.171178	0.0902143	0.0965936	0.162175	0.188106	0.221988	0.175918	0.165722	0.0590049	0.201826	0.180433	0.211915	0.154582	0.154243	0.174408	0.147847	0.160532
cg05541640	ABHD14B	N_Shore	TSS200;TSS200;TSS1500;TSS200	0.126195	0.110586	0.124737	0.120528	0.109185	0.089261	0.101018	0.0891687	0.108835	0.109871	0.0661365	0.0769199	0.116214	0.11055	0.0852812	0.0670495	0.0841967	0.0895273
cg10247798	ABHD14B	N_Shore	TSS200;TSS200;TSS1500;TSS200	0.0501391	0.0441356	0.0581412	0.0528259	0.0597941	0.0631015	0.063516	0.0302096	0.0527329	0.0701334	0.0457105	0.0634805	0.070195	0.0663169	0.0531663	0.0428314	0.0520967	0.0579913
cg10938441	ABHD14B	S_Shore	TSS1500;TSS1500;Body;TSS1500	0.0488423	0.0363093	0.0397154	0.0357593	0.0361961	0.0418848	0.0313183	0.0472733	0.0396624	0.0708457	0.0305403	0.0298843	0.0486525	0.0574284	0.035787	0.0290737	0.0277537	0.0412457
cg12623930	ABHD14B	N_Shore	TSS200;TSS200;TSS1500;TSS200	0.102274	0.0964986	0.132876	0.10834	0.0963	0.110939	0.114879	0.0875095	0.106202	0.138623	0.100144	0.0981879	0.108984	0.120683	0.115693	0.0870418	0.0923727	0.107716
cg25115592	ABHD14B	Island	TSS1500;TSS1500;TSS1500;1stExon;Body	0.00916921	0.0119852	0.0116974	0.0121218	0.0113409	0.010027	0.00859121	0.0106781	0.0107014	0.0151966	0.0111578	0.0109371	0.013733	0.0153156	0.0127321	0.00830798	0.0101229	0.0121879
cg27563048	ABHD14B	N_Shore	TSS200;TSS200;TSS1500;TSS200	0.0349125	0.0405067	0.0310531	0.0320348	0.0332806	0.0456283	0.034386	0.0202644	0.0340083	0.0301272	0.0259877	0.0344408	0.0661423	0.0238766	0.0457173	0.02591	0.0242755	0.0345597
	ABHD14B											0.0681695									0.0667502
cg02456708	ABHD15	Island	TSS1500;TSS1500	0.019519	0.0194602	0.0195666	0.0229897	0.0194151	0.0203036	0.0172843	0.0196824	0.0197776	0.0257122	0.0192925	0.0214161	0.0176078	0.0383451	0.0195272	0.0168075	0.0201674	0.0223595
cg06727412	ABHD15	Island	TSS1500;TSS1500	0.0672814	0.0465929	0.0473475	0.0492689	0.0496107	0.0422325	0.0482706	0.0399445	0.0488186	0.0711408	0.0338041	0.0465418	0.0941118	0.0732888	0.0568233	0.049357	0.0522284	0.059662
cg13110711	ABHD15	Island	TSS1500;TSS1500	0.0131948	0.0164403	0.0162555	0.0185309	0.0131315	0.0214888	0.0194083	0.0116905	0.0162676	0.0157048	0.0137896	0.0135361	0.0165534	0.0335637	0.0206372	0.0138561	0.0168868	0.018066
cg27511558	ABHD15	Island	TSS200	0.0319747	0.0387817	0.0278942	0.0365609	0.0296293	0.0266739	0.0542318	0.024616	0.0337953	0.0627526	0.0230126	0.0358269	0.0644596	0.0554468	0.0254303	0.0319437	0.0309724	0.0412306
	ABHD15											0.0296648									0.0353295
cg19512274	ABHD16A	S_Shore	TSS1500;TSS1500;TSS1500;TSS1500	0.863743	0.86821	0.832251	0.874526	0.866858	0.864516	0.806865	0.839931	0.852113	0.634107	0.822292	0.812274	0.844942	0.850829	0.869339	0.861825	0.856617	0.819028
cg20422342	ABHD16A	S_Shore	TSS1500;TSS1500;TSS1500;TSS1500	0.0253138	0.0350797	0.034581	0.0343384	0.0397879	0.0325536	0.038476	0.0302768	0.0338009	0.0298921	0.029202	0.025885	0.0434293	0.045089	0.0424219	0.0190715	0.0316896	0.033335
	ABHD16A											0.442957									0.426182
cg01809435	ABHD16B	N_Shore	TSS1500	0.418846	0.547935	0.424871	0.542531	0.478998	0.610241	0.447836	0.538792	0.501256	0.494649	0.643556	0.474553	0.488652	0.500339	0.323535	0.512678	0.484742	0.490338
cg04499553	ABHD16B	N_Shore	TSS1500	0.700654	0.77525	0.715925	0.786399	0.724265	0.767033	0.737567	0.778225	0.748165	0.6987	0.753141	0.623472	0.658505	0.771434	0.494432	0.726703	0.79828	0.690583
	ABHD16B											0.62471									0.590461
cg03185871	ABHD17A	S_Shore	TSS1500;TSS1500	0.902447	0.926321	0.902686	0.907431	0.914466	0.908285	0.890541	0.899901	0.90651	0.91439	0.909651	0.903349	0.919819	0.92966	0.899096	0.916838	0.909089	0.912736
cg21368590	ABHD17A	S_Shore	TSS200;TSS200	0.0417363	0.0911535	0.0460444	0.0935887	0.0722295	0.0460383	0.0548284	0.0572633	0.0628603	0.0581641	0.0496913	0.0476554	0.0661438	0.0792806	0.0577063	0.0350105	0.0544396	0.0560114
	ABHD17A											0.484685									0.484374
cg00088282	ABHD17B	Island	TSS200;TSS200;TSS200	0.0670435	0.0886568	0.0732854	0.074762	0.0915062	0.0881961	0.0840212	0.0939524	0.082678	0.0736357	0.12541	0.112227	0.0671107	0.0979584	0.0789186	0.0690201	0.0562257	0.0850633
cg05495292	ABHD17B	Island	TSS200;TSS200;TSS200	0.0238625	0.0285747	0.0362811	0.0345139	0.0262393	0.0217837	0.030737	0.0190394	0.027629	0.0585189	0.0221617	0.0254369	0.0316818	0.0664385	0.0322093	0.0213199	0.0296232	0.0359238
cg08910914	ABHD17B	Island	TSS1500;TSS1500;1stExon	0.0406502	0.0559474	0.0495558	0.0539337	0.0449663	0.0316447	0.0467494	0.0508431	0.0467863	0.0531158	0.0442002	0.0506612	0.0544438	0.0804055	0.0431509	0.029573	0.0369234	0.0490592
cg09705461	ABHD17B	Island	TSS1500;TSS1500;5'UTR;1stExon	0.0603402	0.0430361	0.0459965	0.0578117	0.0419459	0.0310648	0.0450418	0.042991	0.0460285	0.0977092	0.0305836	0.0455418	0.0787665	0.0555397	0.0470025	0.0394068	0.039871	0.0543026
cg14998310	ABHD17B	S_Shore	TSS1500;TSS1500;1stExon	0.0232557	0.0202482	0.019518	0.0285694	0.0239543	0.0202777	0.0191936	0.016482	0.0214374	0.0438434	0.0173698	0.0159798	0.0462416	0.0270287	0.0237637	0.0227229	0.0191681	0.0270147
cg18934139	ABHD17B	Island	TSS1500;TSS1500;5'UTR;1stExon	0.0583451	0.0406096	0.0495803	0.0441614	0.0549913	0.0512074	0.0693888	0.0562081	0.0530615	0.0478358	0.0614406	0.0520176	0.0508605	0.0594086	0.0464239	0.0427613	0.0484538	0.0511503
	ABHD17B											0.0462701									0.050419
cg16190697	ABHD17C	N_Shore	TSS1500	0.920456	0.929682	0.899439	0.915122	0.91149	0.813874	0.919031	0.923391	0.904061	0.93706	0.940781	0.91377	0.878898	0.895236	0.907719	0.908685	0.935014	0.914645
	ABHD17C											0.904061									0.914645
cg03346410	ABHD2	N_Shore	TSS200;TSS200	0.114076	0.0627526	0.0746808	0.0737703	0.0769667	0.0847601	0.0789315	0.0406719	0.0758262	0.111671	0.0490262	0.0674079	0.0846919	0.0942611	0.0640499	0.057927	0.0538565	0.0728614
cg04788288	ABHD2	N_Shore	TSS1500;TSS1500	0.150051	0.0808131	0.0360133	0.142806	0.0823448	0.0660292	0.0302204	0.0680919	0.0820462	0.300319	0.0641563	0.109557	0.0380897	0.254823	0.0680248	0.108467	0.0645597	0.126
cg04871532	ABHD2	N_Shore	TSS1500;TSS1500	0.55305	0.619623	0.642628	0.633071	0.634808	0.465072	0.607073	0.567866	0.590399	0.733505	0.530943	0.497088	0.453159	0.586175	0.461786	0.515054	0.579079	0.544599
cg16651732	ABHD2	N_Shore	TSS1500;TSS1500	0.164918	0.161028	0.123913	0.201676	0.158132	0.146127	0.125489	0.119355	0.15008	0.238478	0.150476	0.108795	0.12213	0.197411	0.121802	0.109306	0.132577	0.147622
cg21651867	ABHD2	N_Shore	TSS1500;TSS1500	0.79139	0.853008	0.828046	0.842272	0.850895	0.828352	0.806119	0.838227	0.829789	0.633645	0.814937	0.790119	0.770339	0.841363	0.849237	0.82597	0.833772	0.794923
cg21841583	ABHD2	N_Shore	TSS1500;TSS1500	0.90908	0.933688	0.921635	0.932386	0.923684	0.924858	0.924693	0.930047	0.925009	0.871435	0.919333	0.913915	0.918699	0.927285	0.937902	0.947246	0.933032	0.921106
cg24508633	ABHD2	N_Shore	TSS1500;TSS1500	0.795686	0.926561	0.728647	0.884282	0.925585	0.904705	0.796371	0.880222	0.855257	0.919482	0.85575	0.819465	0.741898	0.792264	0.814679	0.895018	0.80046	0.829877
cg24589444	ABHD2	N_Shore	TSS200;TSS200	0.0292075	0.025336	0.0288207	0.0322526	0.0286061	0.0235967	0.0209724	0.0251972	0.0267486	0.0530851	0.0282397	0.0257997	0.03318	0.0376787	0.0276026	0.0201321	0.0247438	0.0313077
cg24767289	ABHD2	N_Shore	TSS200;TSS200	0.0244299	0.0206753	0.0197053	0.0219378	0.0205161	0.0183255	0.0166622	0.0183372	0.0200737	0.0136671	0.0191928	0.0216188	0.0231042	0.0234021	0.0205098	0.0138324	0.020648	0.0194969
cg25523753	ABHD2	N_Shore	TSS200;TSS200	0.0235448	0.0278811	0.0265698	0.036796	0.0271081	0.0318002	0.0211045	0.0248903	0.0274618	0.104344	0.0276719	0.0265274	0.0340109	0.0495626	0.0251923	0.0244497	0.0233653	0.0393905
cg26037898	ABHD2	N_Shore	TSS200;TSS200	0.0820078	0.0420929	0.0587487	0.0597552	0.0570276	0.0637494	0.0647179	0.03765	0.0582187	0.0853611	0.0396275	0.060748	0.0952768	0.0771215	0.0574863	0.0660167	0.0495179	0.0663945
	ABHD2											0.330992									0.326689
cg03393602	ABHD3	S_Shore	TSS1500	0.368097	0.152302	0.292252	0.24768	0.14964	0.203278	0.363167	0.264676	0.255137	0.257892	0.216677	0.288873	0.23054	0.358737	0.204534	0.227739	0.280677	0.258209
cg03433155	ABHD3	S_Shore	TSS1500;TSS1500	0.786752	0.758134	0.799205	0.720099	0.674644	0.899538	0.895578	0.820549	0.794312	0.893296	0.864141	0.875968	0.901852	0.752037	0.815254	0.703392	0.744064	0.81875
cg05378295	ABHD3	Island	TSS1500	0.0474455	0.0313404	0.0295358	0.0311171	0.031383	0.0279951	0.0280414	0.0289149	0.0319716	0.0213858	0.0276925	0.0253084	0.0327457	0.031942	0.033342	0.0266689	0.0254643	0.0280687
cg06967703	ABHD3	Island	TSS200	0.0399095	0.0342489	0.0388851	0.0355205	0.0440407	0.0326025	0.0310537	0.0233213	0.0349478	0.0560029	0.0300413	0.0369741	0.138704	0.0490501	0.034141	0.0358477	0.0380703	0.0523539
cg10690887	ABHD3	Island	TSS1500	0.186568	0.0686813	0.144163	0.156456	0.142523	0.131607	0.146733	0.117353	0.136761	0.193406	0.0841005	0.126384	0.121486	0.197488	0.104074	0.119399	0.124707	0.133881
cg13628146	ABHD3	Island	TSS200	0.017466	0.0194439	0.0219268	0.0208169	0.026981	0.0201624	0.0170892	0.0216019	0.020686	0.014659	0.0206546	0.016551	0.0209209	0.0215287	0.0193862	0.0187419	0.0192669	0.0189637
cg15533222	ABHD3	Island	TSS1500	0.0146916	0.0209744	0.0179143	0.0179177	0.0206036	0.0196666	0.0159304	0.0178529	0.0181939	0.0160993	0.0179748	0.0147125	0.0171957	0.0255346	0.018519	0.0123571	0.0186629	0.017632
cg16720675	ABHD3	Island	TSS200	0.0355232	0.0274754	0.0272642	0.0278754	0.0461586	0.0334012	0.0206322	0.020943	0.0299091	0.0210809	0.0246396	0.0226834	0.0445088	0.0324199	0.0255292	0.0241087	0.0234659	0.0273046
cg18756868	ABHD3	Island	TSS200	0.0189504	0.0161729	0.0157474	0.0188912	0.0175433	0.0165292	0.0146274	0.0170632	0.0169406	0.0159331	0.0177475	0.0183465	0.0186974	0.0224512	0.0190908	0.0159148	0.0172699	0.0181814
cg19164487	ABHD3	S_Shore	TSS1500;TSS1500	0.606572	0.655829	0.689851	0.66007	0.65438	0.793468	0.662549	0.752007	0.684341	0.841922	0.706487	0.709778	0.74293	0.582074	0.692484	0.59767	0.640373	0.689215
cg25680245	ABHD3	Island	TSS200	0.0556899	0.0311553	0.0333566	0.0403386	0.0418238	0.0325799	0.0445726	0.0310029	0.038815	0.0289213	0.0377461	0.0449377	0.066354	0.088464	0.0573256	0.0301529	0.0353143	0.048652
cg27109614	ABHD3	Island	TSS200	0.00898777	0.0137603	0.0125058	0.0124716	0.0106579	0.00936365	0.0110704	0.0121222	0.0113675	0.0130684	0.0108996	0.0136859	0.0127295	0.0162747	0.0121913	0.00856844	0.0118423	0.0124075
	ABHD3											0.172782									0.176968
cg01806590	ABHD4	N_Shore	TSS1500	0.940937	0.946629	0.940722	0.941314	0.945415	0.951655	0.954141	0.945141	0.945744	0.957515	0.942802	0.94244	0.941649	0.940784	0.944266	0.952115	0.949664	0.946404
cg01906197	ABHD4	N_Shore	TSS200	0.0785343	0.0380205	0.0623285	0.0572145	0.0592226	0.0636576	0.0439269	0.0565924	0.0574372	0.0457453	0.0477613	0.0570869	0.0849556	0.0762368	0.0604159	0.0593098	0.0509633	0.0603094
cg06813554	ABHD4	N_Shore	TSS1500	0.501907	0.574091	0.53595	0.513074	0.466257	0.312972	0.448919	0.515332	0.483563	0.443746	0.364205	0.370834	0.358554	0.57345	0.360379	0.432486	0.45704	0.420087
cg12153785	ABHD4	N_Shore	TSS200	0.0201006	0.0260355	0.018234	0.0220612	0.0219287	0.0210146	0.0240253	0.0186633	0.0215079	0.0305093	0.0216826	0.0212707	0.0227729	0.0328609	0.0227643	0.0138418	0.0193073	0.0231262
cg14193108	ABHD4	N_Shore	TSS1500	0.506997	0.59335	0.536622	0.581792	0.565505	0.719714	0.572074	0.561564	0.579702	0.822415	0.662986	0.537765	0.550327	0.588264	0.519662	0.52904	0.533923	0.593048
cg16614489	ABHD4	N_Shore	TSS1500	0.44049	0.39986	0.451991	0.415987	0.42426	0.245003	0.352755	0.32927	0.382452	0.172275	0.1766	0.288601	0.295032	0.411449	0.260321	0.268218	0.320075	0.274071
cg20000047	ABHD4	N_Shore	TSS1500	0.0391877	0.0496483	0.0411698	0.0604688	0.081094	0.0336055	0.0465803	0.0663521	0.0522633	0.0616001	0.0390783	0.0405808	0.0616808	0.0868387	0.0416629	0.0287471	0.0400686	0.0500322
cg26394737	ABHD4	N_Shore	TSS200	0.0520623	0.0380162	0.048527	0.0429901	0.0493222	0.0454006	0.0478305	0.0347768	0.0448657	0.0984632	0.0338318	0.0458003	0.0801156	0.0609639	0.0483109	0.0308441	0.0379546	0.0545356
	ABHD4											0.320942									0.302702
cg02059996	ABHD5	Island	TSS200	0.0174994	0.0254053	0.0227747	0.0207647	0.0180926	0.0200815	0.0144286	0.0181641	0.0196514	0.0180175	0.0222955	0.0210439	0.0430124	0.0406974	0.0187493	0.014482	0.019673	0.0247464
cg04988061	ABHD5	N_Shore	TSS1500	0.167341	0.300958	0.20135	0.323724	0.338686	0.446157	0.121004	0.193762	0.261623	0.72849	0.470994	0.30517	0.18484	0.261047	0.165003	0.0633279	0.118087	0.28712
cg09668564	ABHD5	Island	TSS1500	0.0345438	0.0278415	0.0267102	0.0327808	0.0241118	0.0273642	0.0224689	0.0278389	0.0279575	0.0422477	0.0253	0.0240366	0.098278	0.042061	0.0266586	0.0363528	0.025767	0.0400877
cg12832630	ABHD5	Island	TSS200	0.0121998	0.0157866	0.0125166	0.0156708	0.0160908	0.0119348	0.0109355	0.0140277	0.0136453	0.0152788	0.0125913	0.0120001	0.015873	0.0186137	0.0123891	0.00887731	0.0128853	0.0135636
cg13606015	ABHD5	Island	TSS1500	0.0244564	0.0306856	0.0289581	0.0322676	0.0320493	0.0320594	0.0369003	0.0248457	0.0302778	0.0348571	0.0248938	0.0221645	0.0429119	0.0432841	0.0333107	0.0231906	0.0247094	0.0311653
cg14121103	ABHD5	N_Shore	TSS1500	0.0971872	0.089858	0.0823033	0.088877	0.103179	0.0687861	0.0901871	0.0849156	0.0881617	0.0971203	0.0536252	0.0838098	0.157018	0.10964	0.0767436	0.0607897	0.0659303	0.0880846
cg17200204	ABHD5	Island	TSS200	0.160978	0.104736	0.0986851	0.145002	0.153662	0.133277	0.140479	0.0937829	0.128825	0.159583	0.103847	0.116386	0.210539	0.189363	0.134943	0.12894	0.0839825	0.140948
cg18908981	ABHD5	Island	TSS200	0.0949114	0.0803023	0.0637477	0.0654955	0.0609134	0.0672012	0.0792898	0.0441561	0.0695022	0.177716	0.0411136	0.0728606	0.169275	0.116802	0.0696043	0.0802646	0.0485918	0.0970285
cg19150852	ABHD5	Island	TSS1500	0.0330899	0.0887914	0.0586716	0.0724988	0.0884209	0.0472115	0.0456465	0.0587498	0.0616351	0.0604674	0.0449561	0.0421424	0.183251	0.0761271	0.0620899	0.0381759	0.0534577	0.0700834
cg21475256	ABHD5	N_Shore	TSS1500	0.0448709	0.0504064	0.0463586	0.0650271	0.0949573	0.0370014	0.0297837	0.0617894	0.0537743	0.153638	0.0394866	0.0522629	0.108033	0.0693108	0.0312692	0.0261029	0.0335854	0.0642111
cg24770703	ABHD5	Island	TSS200	0.0284563	0.0287869	0.0271082	0.0259751	0.022513	0.02684	0.0404476	0.016973	0.0271375	0.0673005	0.0214674	0.0268735	0.0753526	0.0481443	0.025355	0.0253571	0.0182258	0.0385095
cg24822001	ABHD5	Island	TSS200	0.0234449	0.0288745	0.0196781	0.0200611	0.0191983	0.019498	0.0219333	0.0172058	0.0212367	0.029157	0.0184791	0.0180678	0.0703367	0.0685048	0.0193715	0.0166848	0.0172011	0.0322254
	ABHD5											0.0669523									0.0773144
cg04721908	ABHD6	N_Shore	TSS1500	0.618261	0.739371	0.58971	0.65924	0.657208	0.729898	0.609887	0.629627	0.65415	0.635669	0.579888	0.551869	0.59448	0.689396	0.605393	0.592304	0.663417	0.614052
cg04800682	ABHD6	Island	TSS200	0.0522167	0.0526144	0.0375845	0.0683814	0.0706573	0.0512563	0.0447633	0.0470086	0.0530603	0.0536031	0.0578176	0.0546346	0.0578017	0.0613953	0.0595785	0.0366488	0.0446238	0.0532629
cg05438508	ABHD6	N_Shore	TSS1500	0.0374688	0.0440874	0.0371895	0.0526162	0.0477238	0.0396693	0.0436299	0.0378159	0.0425251	0.0624632	0.0402609	0.034143	0.0427979	0.0569628	0.0504127	0.0360901	0.0359091	0.04488
cg07575867	ABHD6	Island	TSS200	0.0274852	0.0244939	0.0254623	0.0245704	0.0283866	0.0292746	0.0208839	0.0251365	0.0257117	0.0204194	0.0276523	0.024904	0.0265025	0.0276752	0.028837	0.0225262	0.022835	0.0251689
cg07704718	ABHD6	N_Shore	TSS1500	0.681788	0.680955	0.68342	0.661114	0.597165	0.726292	0.63576	0.680067	0.66832	0.730788	0.682363	0.582489	0.665633	0.643493	0.661342	0.581748	0.69525	0.655388
cg09700602	ABHD6	N_Shore	TSS200	0.0695914	0.0472782	0.0610323	0.0567191	0.0529423	0.0623335	0.0553285	0.0352138	0.0550549	0.0961043	0.0350504	0.0481279	0.0770676	0.0730244	0.0538773	0.0478	0.0397888	0.0588551
cg13423394	ABHD6	N_Shore	TSS200	0.0451771	0.0354969	0.0324496	0.041751	0.0402085	0.0342551	0.0246429	0.0290474	0.0353786	0.065636	0.0286096	0.0345473	0.0282988	0.0553859	0.0299079	0.0344966	0.0254868	0.0377961
cg22253522	ABHD6	N_Shore	TSS1500	0.0343257	0.025577	0.0283469	0.0312778	0.0287929	0.0219412	0.0397474	0.0236971	0.0292132	0.0684608	0.0308148	0.0362107	0.0512586	0.0323498	0.0255183	0.0144759	0.0299592	0.036131
cg23880579	ABHD6	Island	TSS200	0.104108	0.123963	0.116862	0.131648	0.200067	0.183735	0.132957	0.135712	0.141131	0.1311	0.138145	0.0997303	0.116088	0.133024	0.120263	0.101275	0.113957	0.119198
	ABHD6											0.189394									0.182748
cg03223805	ABHD8	S_Shore	TSS1500;TSS1500	0.797316	0.88146	0.844283	0.865857	0.841627	0.845827	0.890061	0.910358	0.859599	0.8945	0.900765	0.843171	0.777802	0.83995	0.885521	0.844425	0.85733	0.855433
cg04576684	ABHD8	Island	TSS200	0.1154	0.0937092	0.086857	0.124167	0.114716	0.0587168	0.102834	0.0531915	0.0936989	0.125802	0.0826034	0.0923334	0.178116	0.193387	0.114677	0.064862	0.0970748	0.118607
cg04614656	ABHD8	N_Shore	TSS1500	0.655786	0.720173	0.854048	0.644375	0.677503	0.620599	0.824962	0.810913	0.726045	0.78389	0.714301	0.560836	0.68742	0.672506	0.581219	0.526171	0.611142	0.642186
cg06293444	ABHD8	S_Shore	TSS1500;TSS1500	0.716378	0.779462	0.801328	0.769067	0.758067	0.868049	0.850469	0.853764	0.799573	0.730354	0.836084	0.809938	0.689743	0.691245	0.835438	0.82332	0.64343	0.757444
cg11906827	ABHD8	Island	TSS200	0.0272577	0.0254552	0.0263251	0.0284467	0.0215718	0.0192389	0.0272808	0.0232703	0.0248558	0.0370853	0.0161639	0.0178713	0.0603528	0.0478094	0.0201641	0.0124973	0.0295685	0.0301891
cg14935078	ABHD8	Island	TSS200	0.116523	0.0888522	0.101548	0.129786	0.10575	0.0730883	0.0838094	0.0804025	0.0974699	0.0342675	0.0818926	0.0893751	0.0611902	0.152346	0.135718	0.0742289	0.10785	0.0921085
cg22734480	ABHD8	Island	TSS200	0.0495502	0.0342242	0.0219513	0.0375789	0.0288105	0.0298185	0.0351134	0.0215813	0.0323285	0.0995291	0.0213936	0.02708	0.0786178	0.0354371	0.0409806	0.0313401	0.0314301	0.045726
cg25412575	ABHD8	Island	TSS200	0.0225514	0.0326413	0.0333574	0.0355554	0.0312938	0.0379374	0.0296497	0.0284379	0.031428	0.0254734	0.0263595	0.0249191	0.0241918	0.0463211	0.0330881	0.0367096	0.0260661	0.0303911
cg27152443	ABHD8	Island	TSS200	0.088784	0.0882481	0.0572721	0.0623092	0.0662827	0.073297	0.0885632	0.0462577	0.0713767	0.222719	0.0417373	0.0628347	0.184926	0.11553	0.0644323	0.0650636	0.042072	0.0999144
	ABHD8											0.304042									0.296889
cg03808459	ABI1	Island	TSS200;TSS200;TSS200;TSS200	0.0454968	0.0492583	0.0453398	0.0384946	0.0522555	0.0447903	0.074418	0.0432082	0.0491577	0.049971	0.0456133	0.0468985	0.0497446	0.0662422	0.0531175	0.0299051	0.0479071	0.0486749
cg06960024	ABI1	S_Shore	TSS1500;TSS1500;TSS1500;TSS1500	0.376587	0.304937	0.512107	0.3983	0.487154	0.245518	0.523242	0.446714	0.41182	0.369132	0.237153	0.265678	0.407379	0.453789	0.262038	0.150253	0.320988	0.308301
cg07407658	ABI1	S_Shore	TSS1500;TSS1500;TSS1500;TSS1500;TSS1500;TSS1500;TSS1500;TSS1500;TSS1500;TSS1500;TSS1500	0.055953	0.0624448	0.0606591	0.0683705	0.0643689	0.0391723	0.0702555	0.0550317	0.059532	0.1965	0.0523556	0.0699822	0.0535128	0.0860805	0.0557545	0.0462707	0.0539877	0.0768055
cg13023397	ABI1	Island	TSS1500;TSS1500;TSS1500;TSS1500	0.0439823	0.0475063	0.0457509	0.0527208	0.0604109	0.0567728	0.0546306	0.0601506	0.0527407	0.09519	0.051369	0.0617869	0.045321	0.0708583	0.0524996	0.04336	0.054401	0.0593482
cg16698551	ABI1	Island	TSS200;TSS200;TSS200;TSS200	0.0297991	0.0290556	0.0343483	0.0285813	0.0369449	0.0488887	0.0454089	0.0271982	0.0350281	0.0339034	0.0194345	0.0219663	0.0247169	0.0397412	0.030373	0.0332178	0.0231453	0.0283123
cg17850367	ABI1	S_Shore	TSS1500;TSS1500;TSS1500;TSS1500	0.393954	0.260313	0.54691	0.445956	0.412047	0.380674	0.619659	0.322804	0.42279	0.493106	0.242728	0.286558	0.255436	0.417152	0.266564	0.30327	0.343168	0.325998
cg17918201	ABI1	Island	TSS200;TSS200;TSS200;TSS200	0.0249747	0.0356227	0.0309407	0.0423621	0.035676	0.0241386	0.0208538	0.0285111	0.030385	0.0361216	0.0312228	0.0327362	0.0641627	0.0397245	0.0552578	0.0278498	0.0285535	0.0394536
cg18825419	ABI1	S_Shore	TSS1500;TSS1500;TSS1500;TSS1500	0.159498	0.158752	0.166727	0.24987	0.258788	0.0530045	0.183427	0.130946	0.170127	0.141076	0.10896	0.121182	0.0856993	0.182881	0.0781785	0.117198	0.122298	0.119684
cg20151668	ABI1	Island	TSS200;TSS200;TSS200;TSS200	0.0649262	0.0782195	0.0908603	0.118227	0.103647	0.0882496	0.114012	0.058896	0.0896297	0.0455147	0.0666336	0.0783162	0.0625004	0.138991	0.0740676	0.0530466	0.087521	0.0758239
	ABI1											0.146801									0.120267
cg02767164	ABI2	Island	TSS1500	0.0232062	0.0255619	0.0265524	0.0323139	0.0292372	0.0239741	0.0212684	0.0261462	0.0260325	0.0165529	0.0260289	0.0269849	0.027532	0.0421578	0.0236574	0.0251366	0.0272773	0.026916
cg03531237	ABI2	N_Shore	TSS1500;TSS1500;TSS1500;TSS1500	0.306043	0.221692	0.448009	0.362547	0.29296	0.524345	0.317999	0.371296	0.355611	0.768007	0.620129	0.510387	0.506427	0.350335	0.560271	0.501269	0.399656	0.52706
cg04836792	ABI2	Island	TSS1500	0.025795	0.019661	0.0240544	0.0248777	0.0206976	0.0204185	0.0185288	0.0204547	0.021811	0.0170053	0.0241092	0.0207178	0.0259487	0.0287569	0.0220388	0.0175117	0.0225236	0.0223265
cg05983229	ABI2	Island	TSS200	0.012177	0.0176282	0.0149363	0.0152239	0.0152499	0.013459	0.013757	0.0141986	0.0145787	0.0192075	0.0127553	0.0119839	0.014869	0.0224602	0.0124451	0.010204	0.0125433	0.0145585
cg09845946	ABI2	Island	TSS200	0.0205938	0.0234719	0.0267165	0.0395071	0.029236	0.0247646	0.0318503	0.0210915	0.027154	0.0487992	0.0173825	0.0202823	0.0502973	0.0422845	0.0241061	0.0193932	0.0206506	0.0303995
cg12625293	ABI2	Island	TSS200	0.0371034	0.0228784	0.0242437	0.0319342	0.0360539	0.0321307	0.0374045	0.0265914	0.0310425	0.0278396	0.0294381	0.0267689	0.0309423	0.0411466	0.0225993	0.0277649	0.0306653	0.0296456
cg15797608	ABI2	Island	TSS200	0.0098384	0.0141696	0.0121715	0.0127534	0.0122569	0.0110918	0.00990867	0.0118613	0.0117564	0.0123889	0.0110389	0.012722	0.0141971	0.0175527	0.0112366	0.00921659	0.0111304	0.0124354
cg18312577	ABI2	N_Shore	TSS1500;TSS1500;TSS1500;TSS1500	0.218205	0.16369	0.230714	0.178588	0.16715	0.386248	0.220084	0.1761	0.217597	0.665791	0.46121	0.344252	0.356551	0.197585	0.361357	0.421581	0.267472	0.384475
cg18950215	ABI2	N_Shore	TSS1500;TSS1500;TSS1500;TSS1500	0.282608	0.219896	0.354893	0.329307	0.238331	0.529749	0.297566	0.294633	0.318373	0.626383	0.564987	0.478795	0.500716	0.307858	0.523529	0.448856	0.367124	0.477281
cg24530660	ABI2	N_Shore	TSS1500	0.137894	0.0898904	0.158816	0.131195	0.119112	0.165349	0.143212	0.102471	0.130992	0.468523	0.288343	0.254129	0.259844	0.152491	0.28859	0.326841	0.177552	0.277039
	ABI2											0.115495									0.180214
cg00980784	ABI3		TSS200;TSS1500;TSS200	0.330311	0.397517	0.255502	0.314785	0.33383	0.503177	0.284902	0.336256	0.344535	0.467949	0.475779	0.389443	0.46537	0.348073	0.414675	0.398811	0.34541	0.413189
cg05716556	ABI3		TSS200;TSS1500;TSS200	0.49289	0.485782	0.473684	0.475122	0.431361	0.614226	0.534501	0.465256	0.496603	0.549984	0.570762	0.519509	0.60093	0.557975	0.503693	0.467762	0.553911	0.540566
cg06874426	ABI3		TSS200;TSS1500;TSS200	0.317431	0.332762	0.231636	0.355986	0.354669	0.604886	0.362827	0.326231	0.360803	0.502194	0.532926	0.483675	0.50935	0.418467	0.544093	0.47244	0.34511	0.476032
cg17839611	ABI3		TSS1500;TSS1500;TSS200	0.623881	0.721977	0.610519	0.652772	0.669854	0.684033	0.62537	0.611792	0.650025	0.727908	0.686399	0.558068	0.594252	0.670328	0.476051	0.68242	0.639476	0.629363
cg22960869	ABI3		TSS200;TSS1500;TSS200	0.441273	0.441015	0.23639	0.427028	0.288334	0.803946	0.378498	0.338589	0.419384	0.689753	0.603264	0.520637	0.647218	0.537004	0.680935	0.642138	0.434093	0.59438
cg24456340	ABI3		TSS1500;TSS1500;5'UTR	0.87045	0.879413	0.864537	0.895633	0.895753	0.873611	0.85695	0.854271	0.873827	0.825465	0.860733	0.803716	0.847321	0.868503	0.760789	0.891394	0.861224	0.839893
cg25451120	ABI3		TSS200;TSS1500;TSS200	0.533019	0.616281	0.488223	0.579253	0.562867	0.679157	0.594976	0.566806	0.577573	0.564789	0.581688	0.538668	0.622361	0.644904	0.456221	0.569188	0.616911	0.574341
cg26334023	ABI3		TSS200;TSS1500;TSS200	0.742841	0.523161	0.454014	0.561555	0.476503	0.824534	0.643498	0.475024	0.587641	0.688911	0.679026	0.616677	0.661148	0.682569	0.619908	0.769348	0.576448	0.661754
	ABI3											0.538799									0.59119
cg00569747	ABI3BP		TSS1500	0.798519	0.811846	0.802481	0.837592	0.833771	0.806584	0.813371	0.765881	0.808756	0.660002	0.732987	0.766277	0.783183	0.799094	0.827376	0.864926	0.819858	0.781713
cg18916988	ABI3BP		TSS1500	0.74315	0.647501	0.574368	0.681207	0.709709	0.791097	0.718853	0.615935	0.685228	0.326262	0.58393	0.582896	0.416247	0.62369	0.33641	0.746382	0.663934	0.534969
cg20326222	ABI3BP		TSS1500	0.825459	0.86504	0.82726	0.81093	0.817994	0.863309	0.861048	0.823709	0.836844	0.841817	0.715497	0.812422	0.729271	0.797254	0.797795	0.827946	0.835646	0.794706
cg21968765	ABI3BP		TSS200	0.146022	0.26264	0.154207	0.225519	0.189489	0.390813	0.156203	0.244938	0.221229	0.218287	0.215237	0.306327	0.136874	0.178474	0.157017	0.222266	0.145809	0.197536
cg23634451	ABI3BP		TSS1500	0.784243	0.857863	0.772567	0.860499	0.845492	0.816334	0.863286	0.817509	0.827224	0.730169	0.752789	0.763085	0.65629	0.854702	0.792137	0.855099	0.863057	0.783416
	ABI3BP											0.675856									0.618468
cg00168082	ABL1	S_Shore	TSS200	0.0345252	0.0396385	0.0344813	0.0367542	0.0372556	0.032888	0.028989	0.0306909	0.0344028	0.036694	0.0403715	0.0283268	0.0397425	0.0451782	0.0302715	0.0232836	0.038351	0.0352774
cg01493658	ABL1	Island	TSS1500	0.0165417	0.0281899	0.0266003	0.0294835	0.0282551	0.0269091	0.0219945	0.0239202	0.0252368	0.0447408	0.0238971	0.0255752	0.0321314	0.0388318	0.0230627	0.025121	0.0221168	0.0294346
cg08417804	ABL1	Island	TSS1500	0.220965	0.370475	0.281192	0.33756	0.268923	0.278529	0.299291	0.31111	0.296006	0.247929	0.310882	0.282224	0.242488	0.312316	0.312755	0.285673	0.315091	0.28867
cg09952701	ABL1	Island	TSS1500	0.0832493	0.077522	0.0419988	0.0406876	0.0412514	0.0517957	0.0594216	0.0270384	0.0528706	0.135084	0.0288757	0.0327651	0.151404	0.0809772	0.0511483	0.0465122	0.0422804	0.0711309
cg13467399	ABL1	Island	TSS1500	0.0359123	0.0631877	0.0277288	0.0405939	0.0450896	0.0383094	0.0301352	0.0305134	0.0389338	0.120611	0.0199537	0.0274781	0.0800676	0.0904931	0.037231	0.026811	0.0506556	0.0566626
cg13609937	ABL1	Island	TSS1500	0.0580663	0.0354275	0.035114	0.0503571	0.0428685	0.0454617	0.0402731	0.0353947	0.0428704	0.0237112	0.0433762	0.042608	0.042408	0.0410301	0.0372626	0.0283922	0.0362488	0.0368796
cg13822231	ABL1	Island	TSS1500	0.012848	0.0143497	0.0122548	0.0146629	0.0135281	0.0119923	0.0114007	0.0123639	0.012925	0.0205466	0.0138545	0.0136839	0.0139118	0.01948	0.0130072	0.0110284	0.0139576	0.0149338
cg14205952	ABL1	Island	TSS1500	0.0136571	0.0160637	0.0132513	0.0137748	0.0142991	0.0120707	0.0125342	0.0121961	0.0134809	0.0273785	0.0150333	0.0142737	0.0174993	0.0276189	0.0129374	0.010536	0.0127362	0.0172517
cg14567798	ABL1	Island	TSS1500	0.0195457	0.0216549	0.0207312	0.0228152	0.0208993	0.0203284	0.0167407	0.0238311	0.0208183	0.0130589	0.0244707	0.0196472	0.0188557	0.0232288	0.0188022	0.0158835	0.0198563	0.0192254
cg20728472	ABL1	S_Shore	TSS200	0.0642295	0.0409225	0.0598146	0.0650571	0.0410572	0.0428447	0.0360403	0.0395632	0.0486911	0.0218907	0.0438753	0.0483228	0.0542901	0.0588762	0.0427713	0.0295656	0.06038	0.0449965
	ABL1											0.0586235									0.0614462
cg02303538	ABL2	Island	TSS1500;TSS1500;TSS1500;TSS1500;TSS1500	0.0182994	0.0244783	0.0231217	0.0256394	0.02539	0.0183432	0.0183744	0.019383	0.0216287	0.0206605	0.0214175	0.0210024	0.0260724	0.0299534	0.0203833	0.0162207	0.024536	0.0225308
cg04574732	ABL2	S_Shore	TSS1500;TSS1500;TSS1500;TSS1500;TSS1500	0.723943	0.83605	0.804553	0.851916	0.849434	0.863572	0.784186	0.815264	0.816115	0.769587	0.843437	0.783515	0.817609	0.84844	0.82895	0.864277	0.851671	0.825936
cg05009066	ABL2	Island	TSS200;TSS200;TSS200;TSS200;TSS200	0.0337494	0.0393695	0.038864	0.0465012	0.0447885	0.0483159	0.0457282	0.0318403	0.0411446	0.0294624	0.0349844	0.0396775	0.0331738	0.0636707	0.0406723	0.0526293	0.0377012	0.0414964
cg10805082	ABL2	Island	TSS1500;TSS1500;TSS1500;TSS1500;TSS1500	0.0283096	0.0524345	0.0584236	0.0438558	0.041132	0.0355609	0.0594343	0.0425163	0.0452084	0.0558958	0.0401068	0.0465521	0.063725	0.0567612	0.0676516	0.0388582	0.0533965	0.0528684
cg12505603	ABL2	S_Shore	TSS1500;TSS1500;TSS1500;TSS1500;TSS1500	0.418266	0.476434	0.453852	0.503902	0.422081	0.619194	0.351059	0.479137	0.465491	0.553606	0.557732	0.505999	0.416273	0.415846	0.617316	0.480326	0.452849	0.499993
cg12639574	ABL2	S_Shore	TSS1500;TSS1500;TSS1500;TSS1500;TSS1500	0.816689	0.864054	0.799946	0.865045	0.861528	0.801387	0.84269	0.819938	0.83391	0.735055	0.823726	0.808636	0.806492	0.842809	0.838385	0.854537	0.83299	0.817829
cg13927605	ABL2	S_Shore	TSS1500;TSS1500;TSS1500;TSS1500;TSS1500	0.241224	0.273302	0.368986	0.334859	0.38872	0.44341	0.29143	0.327766	0.333712	0.445224	0.519204	0.280806	0.371902	0.456395	0.387123	0.558576	0.370144	0.423672
cg27498709	ABL2	Island	TSS200;TSS200;TSS200;TSS200;TSS200	0.0364846	0.0351548	0.0409575	0.0479673	0.0382976	0.0413027	0.0255752	0.0362696	0.0377512	0.032817	0.0277715	0.0323836	0.0386115	0.0627648	0.0343627	0.0273842	0.0322039	0.0360374
	ABL2											0.32437									0.340045
cg00997917	ABLIM1		TSS1500;TSS1500	0.899263	0.919242	0.879604	0.913455	0.906147	0.887599	0.907773	0.897778	0.901358	0.929606	0.905848	0.884731	0.898584	0.925735	0.890518	0.905328	0.90394	0.905536
cg01185921	ABLIM1		TSS200;TSS200	0.390231	0.431403	0.419351	0.454241	0.51647	0.502456	0.385113	0.368118	0.433423	0.488859	0.421076	0.472341	0.209269	0.393491	0.476483	0.383094	0.471152	0.414471
cg04508114	ABLIM1		TSS200;TSS200	0.609403	0.702309	0.660808	0.659376	0.738652	0.743706	0.595638	0.549428	0.657415	0.733586	0.687351	0.719112	0.455839	0.609588	0.718968	0.667725	0.648793	0.65512
cg05064181	ABLIM1		TSS1500;TSS1500	0.911185	0.906212	0.842949	0.893863	0.92236	0.92612	0.916581	0.91404	0.904164	0.931608	0.913382	0.921195	0.893845	0.895569	0.907227	0.942752	0.926621	0.916525
cg08653990	ABLIM1		TSS1500;TSS1500	0.300852	0.191529	0.455569	0.387013	0.384709	0.570404	0.363253	0.325972	0.372413	0.595069	0.384781	0.434496	0.143845	0.208807	0.441348	0.226825	0.405845	0.355127
cg11699880	ABLIM1		TSS200;TSS200	0.215239	0.177698	0.173786	0.170014	0.191042	0.328263	0.166732	0.195011	0.202223	0.338972	0.261797	0.321677	0.249648	0.160986	0.200185	0.227613	0.280762	0.255205
cg26975768	ABLIM1		TSS1500;TSS1500	0.7733	0.736614	0.736474	0.790307	0.821463	0.875996	0.834913	0.76724	0.792038	0.927793	0.804592	0.808178	0.666579	0.755212	0.81431	0.842344	0.803052	0.802757
	ABLIM1											0.609005									0.614963
cg01328111	ABLIM2	Island	TSS200;TSS200;TSS200;TSS200;TSS200;TSS200;TSS200	0.0229086	0.0170042	0.0194617	0.0209881	0.0270168	0.02173	0.0137224	0.0198835	0.0203394	0.0161594	0.019941	0.0197465	0.00307563	0.022951	0.0234693	0.0170418	0.0193291	0.0177142
cg03984866	ABLIM2	S_Shore	TSS1500;TSS1500;TSS1500;TSS1500;TSS1500;TSS1500;TSS1500	0.636526	0.736791	0.67017	0.701909	0.677991	0.682336	0.645762	0.663111	0.676825	0.885092	0.671156	0.660688	0.634196	0.629743	0.627837	0.711741	0.714312	0.691846
cg06153498	ABLIM2	Island	TSS200;TSS200;TSS200;TSS200;TSS200;TSS200;TSS200	0.0278205	0.0230896	0.0234336	0.0230379	0.0231964	0.023978	0.0217665	0.0207584	0.0233851	0.0196748	0.0250258	0.0234967	0.0232794	0.0235335	0.0258987	0.0213003	0.0243848	0.0233243
cg08104449	ABLIM2	S_Shore	TSS1500;TSS1500;TSS1500;TSS1500;TSS1500;TSS1500;TSS1500	0.0759132	0.0697347	0.113827	0.100979	0.0954159	0.0575708	0.065754	0.0579014	0.079637	0.146007	0.0350376	0.0449327	0.10014	0.117721	0.0582809	0.0531321	0.0587706	0.0767527
cg09940872	ABLIM2	Island	TSS200;TSS200;TSS200;TSS200;TSS200;TSS200;TSS200	0.0103713	0.0140701	0.0113453	0.0040312	0.0131867	0.0126507	0.0126097	0.0118365	0.0112627	0.0128258	0.0125998	0.0146761	0.0124365	0.0186257	0.0132856	0.00996349	0.0113528	0.0132207
cg12616531	ABLIM2	Island	TSS1500;TSS1500;TSS1500;TSS1500;TSS1500;TSS1500;TSS1500	0.0597034	0.0493413	0.0383538	0.0373122	0.0320274	0.0574253	0.0503829	0.0163002	0.0426058	0.117799	0.0230574	0.0380158	0.125285	0.103196	0.030142	0.0321356	0.0341673	0.0629748
cg14128098	ABLIM2	Island	TSS200;TSS200;TSS200;TSS200;TSS200;TSS200;TSS200	0.0183381	0.0165729	0.0177666	0.0183601	0.0169643	0.0174449	0.0135696	0.0163265	0.0169179	0.0170822	0.0181002	0.0152292	0.0166612	0.0230615	0.0165791	0.0145188	0.0195946	0.0176034
cg20530329	ABLIM2	Island	TSS1500;TSS1500;TSS1500;TSS1500;TSS1500;TSS1500;TSS1500	0.0638688	0.0495459	0.0510051	0.0534554	0.0475722	0.0509596	0.045213	0.0346367	0.0495321	0.084773	0.0263119	0.0461687	0.0749815	0.110769	0.0369923	0.0387053	0.0436514	0.0577941
cg21924273	ABLIM2	S_Shore	TSS1500;TSS1500;TSS1500;TSS1500;TSS1500;TSS1500;TSS1500	0.0170379	0.0234558	0.0267733	0.0236528	0.0302982	0.0192275	0.0215905	0.0195169	0.0226941	0.0197833	0.0148327	0.0194914	0.0213652	0.0228973	0.0200106	0.0138069	0.0238958	0.0195104
cg23257141	ABLIM2	Island	TSS200;TSS200;TSS200;TSS200;TSS200;TSS200;TSS200	0.0244393	0.0197688	0.0200733	0.0231339	0.0198679	0.0184114	0.0169287	0.0194106	0.0202542	0.0180075	0.0200539	0.0190634	0.0197847	0.0216539	0.0197462	0.0175821	0.0204217	0.0195392
	ABLIM2											0.0963453									0.100028
cg05026186	ABLIM3	N_Shore	TSS200	0.28933	0.297156	0.26233	0.233565	0.323255	0.299565	0.313143	0.30219	0.290067	0.270636	0.248683	0.227926	0.245061	0.346647	0.16584	0.272456	0.279166	0.257052
cg05141017	ABLIM3	N_Shore	TSS1500;TSS1500;TSS1500;TSS1500;TSS1500	0.74898	0.90332	0.698718	0.77193	0.886191	0.874257	0.859788	0.846969	0.823769	0.800334	0.872061	0.761098	0.725921	0.75546	0.631267	0.882847	0.867868	0.787107
cg05459971	ABLIM3	N_Shore	TSS200	0.506716	0.566283	0.415539	0.435352	0.535007	0.540971	0.492573	0.462951	0.494424	0.587363	0.417256	0.415471	0.463674	0.504046	0.370381	0.460238	0.429276	0.455963
cg12140854	ABLIM3	N_Shore	TSS1500	0.759284	0.86877	0.736161	0.835747	0.857441	0.839304	0.774703	0.861823	0.816654	0.745999	0.834212	0.809086	0.725048	0.841393	0.717481	0.811606	0.858126	0.792869
cg13653328	ABLIM3	N_Shore	TSS1500	0.945935	0.43766	0.893166	0.932683	0.524631	0.0201015	0.942817	0.481119	0.647264	0.458012	0.951417	0.463367	0.948244	0.498112	0.931988	0.47252	0.951054	0.709339
cg16597425	ABLIM3	N_Shore	TSS1500;TSS1500;TSS1500;TSS1500	0.618643	0.471269	0.57526	0.636018	0.618618	0.532706	0.704301	0.640851	0.599708	0.641917	0.405435	0.527509	0.545141	0.499565	0.5117	0.467897	0.589611	0.523597
cg18129178	ABLIM3	N_Shore	TSS200	0.43644	0.581624	0.415228	0.477982	0.537904	0.511754	0.526773	0.542724	0.503804	0.530672	0.481609	0.454317	0.409835	0.485563	0.28716	0.487047	0.557083	0.461661
cg23229984	ABLIM3	N_Shore	TSS1500	0.856073	0.890539	0.835975	0.857316	0.852317	0.879893	0.827442	0.859909	0.857433	0.865426	0.908915	0.852883	0.869286	0.871179	0.893858	0.856076	0.858483	0.872013
	ABLIM3											0.62914									0.60745
cg06818865	ABO	S_Shore	TSS1500	0.743231	0.803092	0.822451	0.765383	0.702363	0.882331	0.83186	0.748054	0.787346	0.920486	0.826797	0.817718	0.717561	0.839351	0.679077	0.870819	0.812275	0.81051
cg07241568	ABO	Island	TSS200	0.0854435	0.0629824	0.0742218	0.0680489	0.121164	0.336172	0.0583457	0.0612203	0.10845	0.247615	0.391712	0.327207	0.295911	0.144854	0.242089	0.342501	0.18872	0.272576
cg11698867	ABO	Island	TSS200	0.0525036	0.0456268	0.0378709	0.0412053	0.0917653	0.484518	0.0127927	0.0231202	0.0986753	0.208993	0.292891	0.326141	0.266041	0.0839373	0.39878	0.365021	0.241754	0.272945
cg20955080	ABO	S_Shore	TSS1500	0.80921	0.889566	0.864485	0.838362	0.784983	0.938211	0.865732	0.870822	0.857671	0.930928	0.903173	0.750952	0.760344	0.870845	0.696854	0.881978	0.87844	0.834189
cg24072567	ABO	S_Shore	TSS1500	0.133622	0.166731	0.105944	0.186298	0.160624	0.668392	0.0795478	0.198497	0.212457	0.522658	0.509679	0.399019	0.237914	0.368528	0.335231	0.335572	0.212747	0.365168
cg24267699	ABO	Island	TSS1500	0.174126	0.174743	0.212545	0.194163	0.225463	0.537067	0.135457	0.209443	0.232876	0.43861	0.482581	0.395405	0.355807	0.240989	0.379671	0.388558	0.282778	0.37055
	ABO											0.382913									0.487657
cg04514683	ABP1		TSS1500	0.464705	0.416524	0.390458	0.495344	0.458357	0.520975	0.459092	0.462311	0.458471	0.479329	0.579744	0.458729	0.452309	0.57345	0.3645	0.543786	0.489763	0.492701
cg05289678	ABP1		TSS200	0.491629	0.443381	0.452404	0.445717	0.479494	0.645547	0.520294	0.503674	0.497768	0.430892	0.685844	0.448053	0.528905	0.64528	0.443575	0.66762	0.570397	0.552571
cg07897701	ABP1		TSS1500	0.516343	0.659225	0.492942	0.597734	0.599333	0.731493	0.579329	0.61966	0.599507	0.64182	0.774732	0.58207	0.59276	0.625678	0.499672	0.740653	0.650176	0.638445
cg08540215	ABP1		TSS1500	0.821736	0.877971	0.635628	0.448339	0.751336	0.837663	0.804954	0.795209	0.746604	0.73344	0.902593	0.816132	0.865209	0.844386	0.761892	0.881187	0.847556	0.831549
cg13603551	ABP1		TSS200	0.746662	0.763189	0.689627	0.83233	0.795343	0.862429	0.765335	0.8192	0.784264	0.788636	0.874201	0.736067	0.824247	0.83757	0.635666	0.866653	0.809817	0.796607
cg14909495	ABP1		TSS200	0.399555	0.413729	0.338123	0.427584	0.435005	0.545504	0.431328	0.379707	0.421317	0.371559	0.562113	0.361588	0.435098	0.513566	0.349333	0.530172	0.445616	0.446131
cg23533927	ABP1		TSS1500	0.859161	0.771629	0.770458	0.904447	0.858031	0.875836	0.873717	0.888293	0.850197	0.816399	0.893526	0.779519	0.849063	0.892396	0.739736	0.869333	0.901319	0.842661
	ABP1											0.62259									0.657238
cg00270507	ABR		TSS200	0.0737726	0.0357052	0.0493231	0.040957	0.0360271	0.0523776	0.0375523	0.031815	0.0446912	0.0727619	0.0289064	0.0373848	0.0567128	0.0732541	0.0356949	0.0295568	0.0379943	0.0465332
cg00794491	ABR		TSS200	0.0263147	0.0301671	0.0223927	0.0263652	0.0297254	0.0247605	0.0216966	0.0219616	0.025423	0.0328891	0.0193648	0.0208821	0.0349511	0.0477722	0.026794	0.0187683	0.0211423	0.0278205
cg06445159	ABR		TSS1500	0.533426	0.561847	0.55286	0.535075	0.616169	0.381481	0.553162	0.607161	0.542648	0.694905	0.67557	0.598413	0.496979	0.494568	0.390358	0.465352	0.517581	0.541716
cg07135478	ABR		TSS200	0.0253182	0.0265724	0.0252887	0.0279383	0.025683	0.0200402	0.019114	0.0234966	0.0241814	0.0198656	0.0243143	0.0225365	0.0330708	0.0287027	0.0266854	0.0210755	0.0237926	0.0250054
cg07223796	ABR		TSS200	0.0111327	0.0136311	0.0108711	0.0133052	0.0126077	0.0109109	0.00987329	0.0115963	0.011741	0.011943	0.0125568	0.0100642	0.014691	0.0184442	0.010191	0.00817474	0.0118743	0.0122424
cg09927651	ABR		TSS1500	0.618437	0.674683	0.659654	0.626092	0.643497	0.699878	0.584009	0.529972	0.629528	0.633312	0.583669	0.563953	0.411436	0.602799	0.476982	0.553595	0.575027	0.550097
cg12194409	ABR		TSS1500	0.199784	0.195875	0.209236	0.193331	0.194092	0.108572	0.186286	0.168216	0.181924	0.250144	0.184228	0.21719	0.150392	0.149478	0.148002	0.118643	0.175407	0.174186
cg19807420	ABR		TSS1500	0.894308	0.891	0.923111	0.875985	0.917975	0.938942	0.926259	0.919848	0.910929	0.899184	0.951011	0.912702	0.810595	0.892331	0.799682	0.872864	0.912857	0.881403
cg22567775	ABR		TSS1500	0.933875	0.941457	0.936002	0.937896	0.93205	0.949407	0.943878	0.946767	0.940167	0.920056	0.93913	0.938199	0.928499	0.933756	0.888657	0.949898	0.943563	0.93022
cg22967532	ABR		TSS200	0.0857566	0.086402	0.129562	0.106763	0.084422	0.0748865	0.0820132	0.0693555	0.0898951	0.0969697	0.0786282	0.0594986	0.0856342	0.0888203	0.0700556	0.0543582	0.0792743	0.0766549
	ABR											0.340113									0.326588
cg00532656	ABRA		TSS1500	0.875389	0.879524	0.863604	0.882045	0.882732	0.892586	0.877916	0.878427	0.879028	0.931691	0.895319	0.8799	0.904546	0.873717	0.76325	0.8956	0.885843	0.878733
cg07005767	ABRA		TSS200	0.594051	0.610536	0.621922	0.650162	0.651904	0.705174	0.550859	0.624244	0.626107	0.726352	0.700523	0.653228	0.645008	0.582004	0.529686	0.643293	0.687018	0.645889
cg07067773	ABRA		TSS1500	0.883909	0.772897	0.804427	0.840275	0.811881	0.833694	0.818852	0.676962	0.805362	0.806067	0.747638	0.894892	0.8617	0.834185	0.825004	0.885683	0.75308	0.826031
cg08837344	ABRA		TSS200	0.743406	0.790106	0.70315	0.738734	0.828163	0.794847	0.816411	0.748736	0.770444	0.871856	0.876463	0.763436	0.863387	0.705338	0.614088	0.807733	0.815342	0.789705
cg16457675	ABRA		TSS200	0.869569	0.856862	0.85498	0.875903	0.870159	0.829736	0.829761	0.842304	0.853659	0.932703	0.843426	0.862103	0.899558	0.859507	0.851152	0.889285	0.844004	0.872717
cg17049320	ABRA		TSS1500	0.785192	0.8381	0.724966	0.778894	0.830435	0.776284	0.757404	0.814437	0.788214	0.870978	0.803593	0.747929	0.863451	0.682563	0.462602	0.786637	0.78404	0.750224
cg22336863	ABRA		TSS1500	0.485628	0.570651	0.870504	0.529871	0.906071	0.410137	0.447191	0.904075	0.640516	0.515069	0.578927	0.42642	0.522472	0.645716	0.499059	0.343241	0.578417	0.513665
cg23017722	ABRA		TSS1500	0.661934	0.755084	0.663743	0.724057	0.734524	0.710308	0.678195	0.656383	0.698028	0.813157	0.703894	0.658502	0.826562	0.742669	0.738497	0.643451	0.701056	0.728473
cg25021532	ABRA		TSS200	0.760968	0.703829	0.61383	0.756117	0.737608	0.749315	0.610065	0.574685	0.688302	0.803169	0.623021	0.688947	0.807687	0.658534	0.609355	0.81858	0.621998	0.703911
	ABRA											0.749962									0.745483
cg02902110	ABRACL	N_Shore	TSS1500	0.0462252	0.10981	0.0504261	0.129198	0.0625514	0.0641156	0.0505849	0.0662051	0.0723895	0.365223	0.293916	0.0949998	0.114669	0.0819736	0.0887895	0.16669	0.0523262	0.157323
cg16233606	ABRACL	N_Shore	TSS1500	0.0236462	0.0251399	0.0250897	0.0333087	0.0291354	0.0233655	0.0361494	0.02826	0.0280119	0.0372033	0.0340322	0.0297544	0.0227972	0.0373471	0.0274809	0.0229852	0.0226801	0.0292851
	ABRACL											0.0502007									0.0933042
cg06871863	ABT1	Island	TSS1500	0.0189324	0.0201126	0.0180657	0.0187209	0.0187979	0.0149209	0.0185899	0.0196815	0.0184777	0.0140065	0.0192986	0.018857	0.019802	0.0237086	0.017301	0.016555	0.0163974	0.0182408
cg11263887	ABT1	N_Shore	TSS1500	0.0979613	0.0496387	0.0784273	0.0867366	0.0657324	0.0404906	0.0623658	0.0687045	0.0687571	0.0977885	0.0393695	0.0342864	0.0407279	0.0750541	0.0637815	0.0388322	0.0413646	0.0539006
cg12256080	ABT1	N_Shore	TSS200	0.0522066	0.0509151	0.0629932	0.0639761	0.0731458	0.0569506	0.0665326	0.0482286	0.0593686	0.0705466	0.0469339	0.0426015	0.0549626	0.0727436	0.0647773	0.0437123	0.0488765	0.0556443
cg14430738	ABT1	Island	TSS1500	0.0176892	0.019169	0.0163946	0.0204249	0.0165491	0.016377	0.0145597	0.0180177	0.0173976	0.0204367	0.018018	0.020315	0.0220137	0.0316371	0.0180759	0.0131167	0.0153617	0.0198718
cg19871799	ABT1	N_Shore	TSS1500	0.0210603	0.0245122	0.0181426	0.0242046	0.020146	0.0249083	0.0198828	0.0201727	0.0216287	0.0317054	0.0162072	0.0233281	0.030859	0.0363241	0.0287769	0.0171045	0.0218321	0.0257672
cg24283994	ABT1	Island	TSS1500	0.0216956	0.0258568	0.0238404	0.0259486	0.0262898	0.0299159	0.0189111	0.0234578	0.0244895	0.0182828	0.0221172	0.0267833	0.0240001	0.0319637	0.028258	0.0175593	0.0237303	0.0240868
	ABT1											0.0350199									0.0329186
cg00992117	ABTB1	Island	TSS200;TSS200;TSS200	0.0228605	0.0201653	0.02758	0.0254956	0.0233099	0.0324408	0.0192731	0.0249081	0.0245042	0.0130282	0.0239322	0.0279299	0.0260128	0.0236899	0.0254078	0.0220115	0.0251883	0.0234001
cg01631732	ABTB1	N_Shore	TSS1500;TSS1500;TSS1500;Body	0.459336	0.513096	0.433731	0.53383	0.477931	0.506567	0.466018	0.441773	0.479035	0.547134	0.491742	0.441547	0.40794	0.517533	0.421397	0.547399	0.502712	0.484676
cg05091260	ABTB1	Island	TSS1500;Body;TSS1500;TSS1500	0.0940327	0.0719759	0.0504222	0.0661513	0.0541084	0.109169	0.0759175	0.0411479	0.0703656	0.098785	0.0492345	0.0575445	0.118598	0.111163	0.0642572	0.0760793	0.0344502	0.076264
cg11011888	ABTB1	Island	TSS200;TSS200;TSS200	0.0958312	0.028807	0.041905	0.0383001	0.0401818	0.075869	0.0309912	0.0353323	0.0484022	0.032467	0.0461052	0.0277679	0.0676446	0.0494702	0.0428134	0.0372869	0.0351379	0.0423366
cg11448632	ABTB1	Island	TSS200;TSS200;TSS200	0.0183923	0.021048	0.0206254	0.023074	0.0207206	0.0175938	0.0130778	0.0211321	0.019458	0.020702	0.0194211	0.0192659	0.0170768	0.0216697	0.0183825	0.0164453	0.0218226	0.0193482
cg13945556	ABTB1	N_Shore	TSS1500;TSS1500;TSS1500;Body	0.829069	0.910743	0.835496	0.881734	0.882279	0.855197	0.854675	0.874131	0.865416	0.897715	0.879286	0.805889	0.861567	0.877983	0.8517	0.824441	0.875637	0.859277
cg18353563	ABTB1	N_Shore	TSS1500;Body;TSS1500;TSS1500	0.136097	0.111846	0.111752	0.132895	0.108036	0.287886	0.152039	0.0871538	0.140963	0.407326	0.296754	0.181749	0.185285	0.189084	0.163729	0.256071	0.0978757	0.222234
cg25877965	ABTB1	N_Shore	TSS1500;TSS1500;TSS1500;Body	0.794205	0.866457	0.80103	0.852496	0.7801	0.816043	0.794327	0.823978	0.81608	0.830222	0.841196	0.797553	0.81486	0.857109	0.803523	0.812992	0.841965	0.824928
	ABTB1											0.308028									0.319058
cg00057880	ABTB2	S_Shore	TSS1500	0.0421326	0.0459936	0.0431344	0.0469406	0.0486164	0.0381574	0.0385039	0.0436339	0.0433891	0.0459957	0.047019	0.0437474	0.0488146	0.0545927	0.0352317	0.0514681	0.0492153	0.0470106
cg00508498	ABTB2	Island	TSS200	0.0130135	0.0211127	0.0149112	0.0271008	0.014503	0.0140842	0.0144317	0.0175815	0.0170923	0.109884	0.0139548	0.0204892	0.0324052	0.0298015	0.0163009	0.0089529	0.014153	0.0307427
cg02680254	ABTB2	Island	TSS200	0.0832577	0.0414641	0.0403339	0.0515541	0.0450838	0.0348419	0.0710518	0.036016	0.0504504	0.121855	0.0447497	0.0460281	0.0957629	0.0904896	0.0473397	0.033085	0.0405969	0.0649884
cg05792856	ABTB2	Island	TSS1500	0.0624892	0.0310678	0.0348395	0.0490611	0.0452275	0.0560076	0.0386834	0.0334688	0.0438556	0.0286509	0.0364626	0.0358598	0.0400559	0.0441423	0.0287466	0.0370105	0.0366542	0.0359479
cg08164906	ABTB2	Island	TSS200	0.290353	0.310138	0.276771	0.285877	0.294484	0.30009	0.284347	0.2861	0.29102	0.279968	0.264282	0.255817	0.186852	0.353787	0.258262	0.248307	0.284107	0.266423
cg08401981	ABTB2	Island	TSS200	0.0182879	0.022873	0.0203401	0.0222728	0.0235134	0.0222896	0.0181793	0.020584	0.0210425	0.0215428	0.0170364	0.0210564	0.0195836	0.0304445	0.0195443	0.014417	0.0204758	0.0205126
cg09205801	ABTB2	Island	TSS200	0.0191271	0.0346748	0.0248852	0.0299421	0.0215667	0.0162895	0.015772	0.0193107	0.022696	0.028634	0.0275185	0.0254614	0.0252169	0.0493201	0.0213376	0.0188951	0.0256223	0.0277507
cg11553715	ABTB2	Island	TSS200	0.0105781	0.0144167	0.010899	0.011982	0.0131074	0.0116176	0.0104603	0.014803	0.012233	0.0119165	0.0106987	0.0110899	0.0131916	0.0194658	0.00318509	0.00899788	0.0115422	0.011261
cg20211779	ABTB2	Island	TSS200	0.14108	0.110154	0.0863702	0.139557	0.0898715	0.0903244	0.0916125	0.0739844	0.102869	0.166888	0.0843922	0.0791025	0.186556	0.203397	0.0834513	0.0522968	0.0821249	0.117276
cg20728639	ABTB2	Island	TSS1500	0.0319422	0.072787	0.0307252	0.0442665	0.0297505	0.0300983	0.0326133	0.0245496	0.0370916	0.143797	0.0196102	0.0302345	0.124751	0.0908911	0.033471	0.0207362	0.0228003	0.0607864
cg25270655	ABTB2	Island	TSS1500	0.0188987	0.02045	0.0176716	0.0182567	0.0174048	0.0166755	0.0141284	0.0165505	0.0175045	0.0117639	0.0171019	0.0175437	0.0169736	0.0216415	0.018439	0.0121739	0.0158312	0.0164336
	ABTB2											0.0599313									0.0635575
cg01353464	ACAA1	Island	TSS1500;TSS1500;TSS1500;1stExon;5'UTR	0.242301	0.14283	0.165378	0.183287	0.151557	0.191685	0.130185	0.1254	0.166578	0.109802	0.159597	0.143335	0.213903	0.199335	0.165472	0.157846	0.112855	0.157768
cg06069310	ACAA1	Island	TSS1500;TSS1500;TSS1500;TSS200	0.101585	0.247525	0.0586001	0.267557	0.174474	0.137323	0.0663449	0.144689	0.149762	0.0774479	0.0913531	0.0937219	0.0461254	0.238651	0.0756507	0.0780209	0.0982323	0.0999004
cg06239037	ACAA1	Island	TSS1500;TSS1500;TSS1500;1stExon;5'UTR	0.0224115	0.0242037	0.022622	0.0224145	0.0248954	0.0283079	0.0200326	0.023033	0.0234901	0.0293698	0.0260239	0.0265068	0.0259342	0.0549864	0.0262206	0.0154639	0.0225758	0.0283852
cg06808967	ACAA1	Island	TSS200;TSS200;TSS1500;TSS200	0.0337028	0.0411773	0.0336888	0.0395985	0.0377428	0.0306434	0.0313072	0.0447942	0.0365819	0.0352527	0.0383886	0.0308116	0.0464001	0.056953	0.0427789	0.0323758	0.0352969	0.0397822
cg07895684	ACAA1	N_Shore	TSS1500;TSS1500;TSS1500;TSS200	0.0669169	0.0926508	0.0403248	0.0794026	0.0652804	0.104616	0.0418615	0.0708757	0.0702411	0.19161	0.0333381	0.0664254	0.0691827	0.118456	0.048376	0.0504425	0.0583662	0.0795246
cg10537319	ACAA1	Island	1stExon;1stExon;TSS1500;TSS1500;TSS1500;TSS1500;TSS1500;5'UTR;5'UTR;Body	0.0162993	0.0193043	0.0154166	0.0171639	0.0175661	0.0161509	0.0173071	0.0191612	0.0172962	0.0344355	0.0226608	0.0163812	0.0206086	0.0263311	0.0165317	0.0136881	0.0159445	0.0208227
cg15348640	ACAA1	Island	TSS1500;TSS1500;TSS1500;1stExon;5'UTR	0.0254484	0.0257816	0.0235721	0.0292115	0.0297685	0.0250195	0.0249317	0.0212262	0.0256199	0.00897824	0.0197361	0.024421	0.0271873	0.0297763	0.030249	0.0190516	0.0231149	0.0228143
cg15427004	ACAA1	Island	TSS1500;TSS1500;TSS1500;TSS200	0.0758942	0.0676714	0.0448783	0.0683512	0.0704649	0.10326	0.0758454	0.0458643	0.0690287	0.0863178	0.0381754	0.0443361	0.116271	0.104791	0.0346937	0.0465576	0.0456248	0.0645959
cg17034030	ACAA1	Island	TSS1500;TSS1500;TSS1500;TSS200	0.0343504	0.0437964	0.0314727	0.0451599	0.0450342	0.034665	0.0274345	0.0351847	0.0371372	0.0378374	0.0302779	0.0375608	0.0262737	0.0674449	0.0357347	0.0253475	0.0344811	0.0368697
cg24368167	ACAA1	Island	TSS1500;TSS1500;TSS1500;TSS200	0.0161904	0.0220056	0.0161019	0.0234235	0.0317672	0.0166789	0.01586	0.031558	0.0216982	0.0178606	0.0210279	0.0227797	0.0185846	0.0361297	0.0165552	0.0132238	0.0193624	0.0206905
	ACAA1											0.0617433									0.0571154
cg03345145	ACAA2	S_Shore	TSS1500	0.929726	0.947666	0.938856	0.948999	0.9196	0.939487	0.947993	0.942589	0.939364	0.940821	0.933813	0.92321	0.945654	0.932699	0.927459	0.94475	0.936869	0.935659
cg23825830	ACAA2	Island	TSS1500	0.0772458	0.0485969	0.0583747	0.093696	0.063558	0.351756	0.0521157	0.0806382	0.103248	0.302449	0.0951869	0.0679009	0.0963564	0.0790735	0.091433	0.034696	0.0674639	0.10432
	ACAA2											0.521306									0.51999
cg01929530	ACACA	Island	TSS200;TSS1500;TSS200;5'UTR;TSS1500	0.028422	0.0315342	0.0307538	0.0312137	0.0325818	0.060787	0.0303667	0.0312295	0.0346111	0.0235558	0.0434124	0.0350571	0.0440502	0.0380081	0.0338453	0.0375944	0.0309758	0.0358124
cg06201646	ACACA	Island	TSS200;TSS200;5'UTR;5'UTR;TSS1500;TSS1500	0.0294395	0.0249049	0.0279614	0.0253546	0.0294327	0.0331997	0.0241812	0.0290907	0.0279456	0.018678	0.0274607	0.0263031	0.0297163	0.0263821	0.025783	0.0246204	0.0249068	0.0254813
cg06331991	ACACA	N_Shore	1stExon;1stExon;5'UTR;5'UTR;TSS1500;TSS1500;TSS1500;TSS1500	0.0215973	0.0228341	0.0218793	0.0321034	0.0238007	0.0217578	0.0181908	0.0176183	0.0224727	0.024981	0.0210024	0.024266	0.0218204	0.0329629	0.0218274	0.0187619	0.0210013	0.0233279
cg06899192	ACACA	Island	TSS200;TSS1500;TSS200;5'UTR;TSS1500	0.0300345	0.0258733	0.026707	0.0243594	0.0272253	0.0325715	0.0233128	0.0260527	0.0270171	0.0198584	0.0272252	0.0260903	0.0256551	0.0313889	0.0284577	0.0216998	0.0249839	0.0256699
cg13032074	ACACA	N_Shore	1stExon;1stExon;5'UTR;5'UTR;TSS1500;TSS1500;TSS1500;TSS1500	0.025574	0.0323865	0.0281737	0.0313083	0.0396982	0.0354363	0.0342017	0.0302645	0.0321304	0.0332627	0.0258486	0.0275032	0.0336435	0.0479081	0.0362737	0.0404713	0.0314382	0.0345437
cg15515895	ACACA	Island	1stExon;TSS1500;5'UTR;TSS1500;5'UTR;TSS1500;1stExon	0.111074	0.0893614	0.0832329	0.0799223	0.0842729	0.0791041	0.113809	0.0528518	0.0867035	0.173382	0.0541503	0.0936253	0.16393	0.149136	0.0832539	0.0732361	0.0649904	0.106963
cg15839435	ACACA	Island	TSS200;TSS1500;TSS200;5'UTR;TSS1500	0.0144625	0.0190258	0.0152354	0.0174353	0.0171917	0.0178947	0.0139105	0.0169221	0.0165098	0.0163441	0.0150543	0.0150003	0.0174383	0.0269541	0.0157757	0.0133718	0.017853	0.017224
cg16616240	ACACA	N_Shore	5'UTR;TSS1500;TSS1500;TSS1500;TSS1500;Body	0.0862647	0.0811046	0.0764711	0.0871005	0.0806953	0.0992568	0.114483	0.0836345	0.0886263	0.133697	0.0743016	0.0793656	0.0917436	0.0841366	0.0732932	0.0512853	0.0778271	0.0832062
cg18378490	ACACA	Island	TSS200;TSS1500;TSS200;5'UTR;TSS1500	0.0203497	0.0208105	0.021335	0.0201463	0.0193804	0.0213676	0.020572	0.0173422	0.020163	0.0159135	0.0197811	0.0160676	0.0160789	0.029657	0.0226618	0.015132	0.0187053	0.0192497
cg27200190	ACACA	Island	1stExon;TSS1500;5'UTR;TSS1500;5'UTR;TSS1500;1stExon	0.00926511	0.0120592	0.0109082	0.0112387	0.0101929	0.00898285	0.00830996	0.0092994	0.010032	0.0104335	0.0092899	0.0114324	0.0101587	0.0186131	0.010847	0.00804245	0.00985186	0.0110836
	ACACA											0.0366211									0.0382562
cg02022322	ACACB		TSS1500	0.822812	0.876679	0.842816	0.878297	0.883556	0.70843	0.815394	0.866811	0.836849	0.637035	0.701886	0.769089	0.693389	0.861761	0.630638	0.821063	0.886925	0.750223
cg10703506	ACACB		TSS1500	0.881618	0.924011	0.903174	0.921751	0.909535	0.912351	0.909135	0.903104	0.908085	0.886686	0.910284	0.88928	0.893525	0.928005	0.752567	0.935322	0.919173	0.889355
cg12178147	ACACB		TSS1500	0.696666	0.732035	0.699464	0.677873	0.610341	0.668383	0.732184	0.715334	0.691535	0.777722	0.817325	0.669356	0.659161	0.668549	0.504242	0.628493	0.73342	0.682283
	ACACB											0.812156									0.773954
cg01844438	ACAD10	Island	TSS200;1stExon;TSS200;5'UTR	0.0283825	0.0292489	0.0289154	0.0200999	0.0354449	0.0278381	0.0240587	0.0267403	0.0275911	0.0222747	0.0249909	0.0329725	0.0274181	0.0348958	0.0278077	0.025589	0.0287343	0.0280854
cg03159671	ACAD10	Island	TSS200;TSS200;TSS200	0.014918	0.0383001	0.0186708	0.0224465	0.0150169	0.0142248	0.0154429	0.0188934	0.0197392	0.0234698	0.0158481	0.0157671	0.0327056	0.0513183	0.0174914	0.0145975	0.0193038	0.0238127
cg07645393	ACAD10	Island	TSS1500;1stExon;5'UTR;TSS1500	0.0161024	0.0278582	0.0213562	0.0194147	0.0217182	0.0136782	0.0112436	0.0141756	0.0181934	0.0467879	0.0139069	0.0138712	0.0263903	0.0338853	0.0133926	0.0105198	0.0179061	0.0220825
cg08577424	ACAD10	Island	TSS1500;Body;TSS1500	0.0412036	0.0233726	0.0210105	0.0637614	0.036865	0.0173462	0.0180903	0.0289603	0.0313262	0.0178949	0.0212835	0.0240222	0.0336472	0.0284254	0.0323732	0.0197809	0.0299724	0.025925
cg17042483	ACAD10	N_Shore	TSS1500;TSS1500;Body	0.872173	0.871077	0.894049	0.910961	0.895793	0.864012	0.848651	0.870218	0.878367	0.884695	0.86336	0.892203	0.876257	0.899168	0.828166	0.889304	0.885573	0.877341
cg17417787	ACAD10	Island	TSS1500;1stExon;TSS1500	0.0180684	0.0230427	0.0226274	0.0232894	0.0245668	0.0190974	0.0218974	0.0218345	0.021803	0.0185639	0.0227119	0.0200217	0.0234156	0.0256119	0.0242483	0.0163359	0.023406	0.0217894
cg18108237	ACAD10	Island	TSS200;1stExon;TSS200;5'UTR	0.0343773	0.0350972	0.0342308	0.0440826	0.0343533	0.0310189	0.0403931	0.0363531	0.0362383	0.0400773	0.0265225	0.0384836	0.0521467	0.0562527	0.0335163	0.0189067	0.0357791	0.0377106
cg18911278	ACAD10	Island	TSS1500;1stExon;TSS1500	0.0273899	0.028169	0.0242122	0.0280947	0.0238203	0.0152054	0.0194385	0.0209131	0.0234054	0.0634546	0.0174431	0.0220227	0.0457237	0.0486548	0.031538	0.0210852	0.0201476	0.0337587
cg25927219	ACAD10	Island	TSS200;1stExon;TSS200;5'UTR	0.0378679	0.0407463	0.0393765	0.0426043	0.0387283	0.0462364	0.0321633	0.0276813	0.0381755	0.0824218	0.0243817	0.0379656	0.0793383	0.10902	0.0299418	0.0223482	0.0601039	0.0556902
	ACAD10											0.121649									0.125133
cg01958008	ACAD9	N_Shore	TSS1500	0.69024	0.737492	0.713441	0.75718	0.735861	0.693418	0.698576	0.702397	0.716076	0.705777	0.673117	0.778971	0.639201	0.715868	0.745035	0.652948	0.736671	0.705948
cg04059835	ACAD9	N_Shore	TSS1500	0.0361614	0.0199202	0.0190368	0.0257916	0.0213937	0.0161074	0.0154592	0.0160268	0.0212371	0.0480012	0.0191582	0.0237544	0.0165516	0.0301738	0.0190206	0.0227557	0.0181299	0.0246932
cg04726800	ACAD9	Island	TSS200	0.0297637	0.0273909	0.0267098	0.0261228	0.023636	0.0222027	0.0247717	0.0267895	0.0259234	0.0507034	0.0248224	0.0253392	0.0344363	0.0555443	0.0286919	0.0188922	0.0290759	0.0334382
cg11901034	ACAD9	Island	TSS200	0.17405	0.100308	0.110494	0.0592813	0.0830615	0.0264199	0.0539991	0.0369988	0.0805766	0.0389279	0.0597013	0.0414792	0.0815909	0.137497	0.0615905	0.0649031	0.0951661	0.072607
cg14470209	ACAD9	Island	TSS200	0.0250413	0.0256961	0.0289953	0.040841	0.029825	0.0272292	0.0365705	0.0241551	0.0297942	0.065708	0.0246093	0.0256249	0.036244	0.0423105	0.0343508	0.0176043	0.0267243	0.034147
cg14711243	ACAD9	N_Shore	TSS1500	0.0459311	0.0378993	0.035783	0.0403079	0.0363287	0.535619	0.0277742	0.968417	0.216008	0.395838	0.0288349	0.0348128	0.419362	0.0597619	0.452759	0.0455997	0.0376789	0.184331
cg14957639	ACAD9	Island	TSS200	0.020253	0.0171258	0.0197233	0.0177302	0.0207493	0.017716	0.0158126	0.0175805	0.0183363	0.0162915	0.0205637	0.0188045	0.0189464	0.0202093	0.0192424	0.0149519	0.0184846	0.0184368
cg15140619	ACAD9	N_Shore	TSS1500	0.0799045	0.0707081	0.0654383	0.0755522	0.0612985	0.0851613	0.076087	0.0826172	0.0745959	0.0766776	0.0673932	0.0688836	0.105988	0.0928978	0.061034	0.0587353	0.0668699	0.0748099
cg24203234	ACAD9	Island	TSS200	0.0185047	0.00470654	0.0166462	0.0184644	0.0156572	0.0162957	0.0126321	0.0174065	0.0150392	0.0113268	0.0158421	0.0171208	0.0172581	0.019613	0.015238	0.0137663	0.0151396	0.0156631
cg25793571	ACAD9	N_Shore	TSS1500	0.0369138	0.0437021	0.0542746	0.0420952	0.0422801	0.0249327	0.031403	0.0214949	0.037137	0.0539205	0.0263987	0.0344902	0.0347069	0.0522973	0.046736	0.0149384	0.0382907	0.0377223
cg26779346	ACAD9	Island	TSS200	0.0337917	0.0348939	0.031308	0.0459616	0.039736	0.0276803	0.0469971	0.0331441	0.0366891	0.110898	0.0317148	0.0284172	0.077353	0.0579534	0.0326806	0.0277053	0.0324286	0.0498939
	ACAD9											0.115583									0.11379
cg01812328	ACADL	S_Shore	TSS1500	0.422441	0.533902	0.545412	0.532343	0.493341	0.683014	0.512382	0.415673	0.517314	0.43232	0.632087	0.536044	0.354012	0.472299	0.58819	0.412344	0.457668	0.485621
cg04788432	ACADL	S_Shore	TSS1500	0.657874	0.729397	0.689274	0.756395	0.754922	0.764488	0.713804	0.565	0.703894	0.534221	0.633206	0.652742	0.487646	0.744157	0.640912	0.628498	0.697137	0.627315
cg06062084	ACADL	S_Shore	TSS200	0.157711	0.130487	0.154405	0.116696	0.145248	0.102447	0.125767	0.137343	0.133763	0.0780267	0.118638	0.113315	0.113706	0.138148	0.0915053	0.116263	0.146523	0.114516
cg07308161	ACADL	S_Shore	TSS1500	0.459438	0.485273	0.51589	0.603422	0.52068	0.233749	0.466043	0.559808	0.480538	0.225011	0.397	0.526364	0.227225	0.611525	0.292739	0.193733	0.401109	0.359338
cg09308336	ACADL	S_Shore	TSS200	0.0447949	0.0527846	0.103317	0.0803367	0.0667861	0.0309773	0.0738322	0.0524683	0.0631621	0.0592527	0.0310297	0.0412811	0.065843	0.0700468	0.0562818	0.0285281	0.0483074	0.0500713
cg16316649	ACADL	S_Shore	TSS200	0.0542634	0.0638046	0.0957431	0.0793826	0.0827679	0.072737	0.0694608	0.0861737	0.0755416	0.0554335	0.0561364	0.0583069	0.0481239	0.0818116	0.0493895	0.0380159	0.072302	0.05744
cg19427188	ACADL	S_Shore	TSS200	0.069579	0.0896607	0.120611	0.102517	0.0817936	0.0438261	0.0542194	0.0950726	0.0821599	0.0478018	0.0601696	0.0557694	0.0716427	0.0703225	0.0488405	0.037624	0.0805664	0.0590921
cg21933859	ACADL	S_Shore	TSS200	0.0337749	0.0322418	0.0435938	0.0378712	0.0434858	0.0241903	0.0321621	0.0354133	0.0353416	0.0258974	0.0243705	0.0258574	0.0197639	0.0361121	0.022767	0.0157589	0.0269161	0.0246804
cg24637361	ACADL	S_Shore	TSS1500	0.892441	0.908493	0.837687	0.872022	0.890618	0.803602	0.876123	0.88878	0.871221	0.706459	0.868768	0.867792	0.673678	0.883375	0.709964	0.764722	0.856483	0.791405
	ACADL											0.329215									0.285498
cg00505481	ACADM	N_Shore	TSS1500;TSS1500;TSS1500;TSS1500;TSS1500	0.900433	0.916887	0.923041	0.917215	0.928673	0.924529	0.932836	0.898544	0.91777	0.933465	0.87242	0.890511	0.927251	0.907776	0.896928	0.904983	0.912791	0.905766
cg02789892	ACADM	N_Shore	TSS200;TSS200;TSS200;TSS200;TSS200	0.0661374	0.0699259	0.074609	0.0862135	0.0865007	0.0563167	0.0859351	0.070633	0.0745339	0.087777	0.0715338	0.0856911	0.0736521	0.0748233	0.0547502	0.0568239	0.0587205	0.0704715
cg04872557	ACADM	Island	TSS200;TSS200	0.0404249	0.0335862	0.0442688	0.0427014	0.0391504	0.0456103	0.0380339	0.0368593	0.0400794	0.0258873	0.0375824	0.0378643	0.0410888	0.0399917	0.0409599	0.0353751	0.0346773	0.0366784
cg05258079	ACADM	N_Shore	TSS1500;TSS1500	0.853151	0.897427	0.876234	0.886074	0.89352	0.887242	0.887607	0.887483	0.883592	0.935332	0.894838	0.861768	0.916009	0.862048	0.882646	0.877812	0.912479	0.892867
cg05467918	ACADM	Island	TSS200;TSS200	0.0174376	0.0198426	0.0182838	0.0203797	0.0152389	0.015965	0.0195684	0.0175043	0.0180275	0.0183137	0.019722	0.019108	0.0203067	0.0315126	0.0162118	0.0170987	0.0125534	0.0193534
cg05928218	ACADM	N_Shore	TSS1500;TSS1500	0.884615	0.878509	0.867385	0.881698	0.910032	0.889625	0.902444	0.885954	0.887533	0.903518	0.899686	0.895196	0.890271	0.873858	0.867662	0.888226	0.905464	0.890485
cg10523679	ACADM	N_Shore	TSS1500;TSS1500	0.0401921	0.0452501	0.16212	0.200718	0.0786194	0.0359427	0.19141	0.0428489	0.0996376	0.161567	0.0379108	0.0400583	0.129691	0.0648062	0.11987	0.0309324	0.119752	0.0880735
cg14493553	ACADM	Island	TSS200;TSS200;TSS200;TSS200;TSS200	0.0315152	0.0242376	0.025445	0.0265367	0.0222255	0.0235619	0.0190418	0.0190064	0.0239463	0.0239712	0.0147887	0.0197379	0.0245273	0.0324953	0.0209717	0.018211	0.0188044	0.0216884
cg14565881	ACADM	Island	TSS200;TSS200	0.0134098	0.0147405	0.0132104	0.0189694	0.0183804	0.014368	0.0130457	0.0156727	0.0152246	0.012693	0.0152085	0.0139204	0.0155516	0.0195395	0.0146843	0.0104617	0.0141165	0.0145219
cg18395777	ACADM	Island	TSS200;TSS200	0.032451	0.025968	0.0197786	0.0347961	0.0416042	0.0281947	0.0164733	0.0309306	0.0287746	0.0113259	0.0264552	0.033321	0.0362847	0.0411053	0.0283515	0.019703	0.0326401	0.0286483
cg20003976	ACADM	N_Shore	TSS1500;TSS1500	0.769957	0.831505	0.848472	0.888438	0.882853	0.850993	0.870834	0.793294	0.842043	0.838089	0.825478	0.856168	0.737523	0.881618	0.831846	0.807141	0.855054	0.829115
cg21537122	ACADM	N_Shore	TSS1500;TSS1500	0.810043	0.840791	0.811657	0.78781	0.819121	0.796188	0.837279	0.798966	0.812732	0.912716	0.850815	0.843227	0.822083	0.820089	0.839776	0.89921	0.84808	0.854499
cg22875332	ACADM	N_Shore	TSS1500;TSS1500	0.11981	0.10184	0.227555	0.302884	0.24776	0.129531	0.297833	0.108773	0.191998	0.299321	0.123792	0.113728	0.362521	0.211647	0.272056	0.134725	0.258391	0.222023
	ACADM											0.371992									0.374938
cg04406875	ACADS	N_Shore	TSS1500;TSS1500	0.919542	0.93882	0.922858	0.943308	0.9326	0.941964	0.940501	0.942299	0.935237	0.914137	0.943231	0.921821	0.924756	0.929856	0.933444	0.954399	0.929243	0.931361
cg08618068	ACADS	Island	TSS200	0.0178449	0.0231298	0.0247794	0.0203261	0.0358691	0.0170799	0.0223604	0.0234567	0.0231058	0.0181896	0.0201715	0.015301	0.0185583	0.0256528	0.0157952	0.0172838	0.0175618	0.0185642
cg09675881	ACADS	N_Shore	TSS1500;TSS1500	0.862685	0.886556	0.878038	0.907672	0.872561	0.900056	0.851821	0.880018	0.879926	0.814586	0.875558	0.870438	0.854058	0.880495	0.868264	0.90773	0.870871	0.86775
cg10600917	ACADS	Island	TSS200	0.0545398	0.0790441	0.0823915	0.0956196	0.10733	0.0570539	0.14912	0.0643935	0.0861866	0.12387	0.0507695	0.0771142	0.0864235	0.098576	0.0676696	0.0660931	0.0585036	0.0786274
cg21721566	ACADS	N_Shore	TSS1500	0.336884	0.505216	0.495665	0.544705	0.552581	0.47252	0.385588	0.534464	0.478453	0.710345	0.533563	0.456398	0.391234	0.374618	0.308078	0.351088	0.44226	0.445948
cg23907586	ACADS	N_Shore	TSS1500	0.11407	0.104895	0.0701732	0.136279	0.118125	0.0692494	0.0549513	0.0595446	0.0909109	0.0776229	0.0531206	0.0513314	0.0595902	0.0968534	0.0890158	0.0549989	0.0560187	0.067319
cg24768164	ACADS	N_Shore	TSS1500	0.0942685	0.0844089	0.0735792	0.0840109	0.0653783	0.101736	0.117952	0.0662209	0.0859443	0.0619858	0.0924366	0.0378575	0.0564604	0.0881996	0.0784726	0.0664063	0.0444225	0.0657802
cg27246729	ACADS	N_Shore	TSS200	0.0859474	0.10872	0.0777511	0.124605	0.104269	0.0508964	0.0641665	0.0870996	0.0879319	0.107648	0.0359271	0.052892	0.0379492	0.0767339	0.0529049	0.0429624	0.0659647	0.0591228
cg27522780	ACADS	Island	TSS200	0.0539535	0.0919622	0.0726422	0.0969669	0.0973944	0.0705485	0.0959295	0.0635854	0.0803728	0.0986476	0.0453805	0.0658503	0.0980475	0.099499	0.0753484	0.0653611	0.0570286	0.0756454
cg27560629	ACADS	N_Shore	TSS1500;TSS1500	0.53461	0.682473	0.713974	0.697071	0.763306	0.690914	0.660998	0.745493	0.686105	0.882565	0.621138	0.67517	0.604087	0.577535	0.472368	0.555141	0.732228	0.640029
	ACADS											0.343417									0.325015
cg08505076	ACADVL	N_Shore	TSS1500;TSS1500;Body;TSS1500	0.96305	0.971328	0.950428	0.960116	0.961017	0.973384	0.968471	0.955751	0.962943	0.987828	0.951459	0.954467	0.968604	0.945934	0.934073	0.970212	0.957412	0.958749
cg21636577	ACADVL	N_Shore	TSS1500;TSS1500;Body;TSS1500	0.585331	0.688932	0.615437	0.709153	0.626411	0.642122	0.646221	0.66936	0.647871	0.611106	0.643035	0.624127	0.61588	0.673067	0.529862	0.651789	0.69115	0.630002
cg24825722	ACADVL	N_Shore	TSS1500;TSS1500;Body;TSS1500	0.411101	0.533053	0.490826	0.478939	0.464444	0.462266	0.452161	0.559471	0.481533	0.479461	0.515728	0.475558	0.419869	0.454826	0.36505	0.473209	0.4886	0.459038
	ACADVL											0.697449									0.682596
cg06675190	ACAN	Island	TSS1500;TSS1500	0.093139	0.0747264	0.166547	0.103448	0.1545	0.274556	0.0862793	0.103262	0.132057	0.269941	0.353982	0.331556	0.387674	0.126216	0.395968	0.489828	0.126094	0.310157
cg14914908	ACAN	N_Shore	TSS1500;TSS1500	0.591651	0.579576	0.496078	0.584896	0.606413	0.685417	0.632562	0.557103	0.591712	0.566905	0.557829	0.499971	0.646747	0.615951	0.498481	0.692645	0.677723	0.594531
cg26410149	ACAN	N_Shore	TSS1500;TSS1500	0.792584	0.867538	0.655518	0.829743	0.743843	0.897911	0.869011	0.800364	0.807064	0.903613	0.822225	0.704968	0.804745	0.793349	0.627947	0.869024	0.77388	0.787469
cg26466703	ACAN	N_Shore	TSS1500;TSS1500	0.788228	0.893014	0.790437	0.870781	0.885082	0.914919	0.845007	0.854306	0.855222	0.616847	0.865713	0.640445	0.733114	0.834658	0.578573	0.866036	0.843618	0.747376
cg27621340	ACAN	Island	TSS1500;TSS1500	0.0723677	0.0945581	0.113399	0.069403	0.122388	0.397408	0.0807259	0.0924632	0.130339	0.155079	0.313394	0.122269	0.268708	0.207677	0.437726	0.546147	0.101363	0.269045
	ACAN											0.503279									0.541716
cg11807006	ACAP1		TSS200	0.361058	0.332004	0.274899	0.31752	0.364634	0.596671	0.34023	0.286256	0.359159	0.425888	0.519948	0.330115	0.37588	0.421259	0.36599	0.432228	0.434738	0.413256
cg13295242	ACAP1		TSS200	0.155564	0.0691569	0.096296	0.112169	0.144568	0.21331	0.112344	0.0833848	0.123349	0.381261	0.17588	0.0993868	0.143759	0.207536	0.103552	0.265483	0.113945	0.18635
cg13357383	ACAP1		TSS1500	0.514713	0.595244	0.522197	0.53291	0.601619	0.695164	0.518325	0.587469	0.570955	0.710114	0.641179	0.541545	0.61513	0.572259	0.575858	0.622826	0.598534	0.609681
cg13670306	ACAP1		TSS200	0.218231	0.375913	0.174897	0.177177	0.261812	0.401914	0.24204	0.246035	0.262252	0.420783	0.395184	0.206658	0.35124	0.352635	0.279237	0.376777	0.270001	0.331564
cg13925686	ACAP1		TSS1500	0.493794	0.576319	0.400932	0.515038	0.54038	0.65536	0.516726	0.505626	0.525522	0.598056	0.617276	0.519177	0.647695	0.573057	0.519638	0.625868	0.560114	0.58261
cg14050954	ACAP1		TSS1500	0.535054	0.563308	0.394888	0.506537	0.569199	0.697435	0.566957	0.487222	0.540075	0.629796	0.708878	0.524832	0.507395	0.567464	0.50931	0.662346	0.566836	0.584607
	ACAP1											0.396885									0.451345
cg11047049	ACAP2	Island	TSS200	0.0116145	0.014844	0.0119488	0.0144671	0.01204	0.0112765	0.0106175	0.0119456	0.0123442	0.0487026	0.0109203	0.0121381	0.0129088	0.0240511	0.0106225	0.00854906	0.0132956	0.0176485
cg14163776	ACAP2	S_Shore	TSS1500	0.189881	0.202863	0.210955	0.259798	0.196638	0.184039	0.147402	0.21294	0.200565	0.13173	0.109941	0.0936208	0.0813094	0.242487	0.124032	0.106232	0.147754	0.129638
cg14973369	ACAP2	Island	TSS200	0.0608894	0.0442117	0.0430904	0.0396857	0.0474628	0.0333845	0.0404028	0.0327489	0.0427345	0.0778987	0.0242395	0.0749278	0.0623063	0.10985	0.0323462	0.0372998	0.0306418	0.0561888
cg16824377	ACAP2	Island	TSS1500	0.019352	0.0258594	0.0218942	0.0240668	0.0212986	0.0240596	0.0226395	0.0194991	0.0223337	0.046785	0.0218854	0.0204946	0.0299817	0.0298142	0.0207498	0.022196	0.0201222	0.0265036
cg19252739	ACAP2	Island	TSS200	0.0268806	0.0262864	0.0262566	0.0293282	0.0306878	0.0261125	0.0227472	0.0260173	0.0267896	0.019904	0.0288614	0.0287497	0.041336	0.0425885	0.0274482	0.0244949	0.0264735	0.029982
cg20275925	ACAP2	Island	TSS1500	0.0110256	0.0139843	0.0111796	0.0142578	0.0123205	0.0107194	0.00971032	0.0116813	0.0118599	0.0114905	0.0138051	0.0114796	0.0150879	0.0168665	0.0112767	0.00862131	0.010532	0.012395
cg26111327	ACAP2	S_Shore	TSS1500	0.922056	0.914607	0.897144	0.90694	0.911746	0.814699	0.930106	0.911896	0.901149	0.773807	0.752432	0.722314	0.677154	0.867313	0.562383	0.649954	0.832271	0.729704
	ACAP2											0.173968									0.143151
cg15042692	ACAP3	Island	TSS200;TSS1500	0.0109452	0.0163318	0.0143291	0.0154781	0.0131744	0.011513	0.0115285	0.0132871	0.0133234	0.0168848	0.0127232	0.0128096	0.0154657	0.0179395	0.0137162	0.0130055	0.0137079	0.0145315
cg15868629	ACAP3	Island	TSS1500;TSS200	0.0122267	0.0197066	0.0163234	0.0154657	0.0122448	0.0117347	0.0104907	0.0116047	0.0137247	0.0132538	0.0163839	0.0130663	0.0163605	0.024463	0.0152336	0.0100623	0.013343	0.0152708
cg26214604	ACAP3	Island	TSS1500;TSS200	0.0249375	0.0257413	0.0318769	0.0294645	0.0324828	0.0231368	0.0231523	0.0245093	0.0269127	0.0213779	0.0319901	0.0250081	0.0290396	0.0337313	0.0229746	0.022739	0.0252478	0.0265136
cg27642349	ACAP3	Island	TSS1500;TSS200	0.0250199	0.0258903	0.0334894	0.0299304	0.0320762	0.0261414	0.0218671	0.0268281	0.0276553	0.0243538	0.0296524	0.0256453	0.0242439	0.0396343	0.0273053	0.020013	0.025662	0.0270637
	ACAP3											0.020404									0.0208449
cg03920739	ACAT1	Island	TSS200	0.0194903	0.0225721	0.0209804	0.0243029	0.0231936	0.0223332	0.0157924	0.0215608	0.0212782	0.0159248	0.0230716	0.0228051	0.0223064	0.0231592	0.0203218	0.0181742	0.0214214	0.0208981
cg05903298	ACAT1	Island	TSS200	0.0164905	0.0187191	0.0180694	0.025505	0.0130604	0.0176056	0.0107656	0.0170367	0.0171565	0.0142912	0.0157379	0.0160623	0.0243968	0.0263751	0.0142658	0.0115501	0.0171251	0.0174755
cg05962325	ACAT1	Island	TSS1500	0.0612905	0.0611966	0.0695908	0.060167	0.069042	0.0742792	0.0756115	0.0482686	0.0649308	0.0483946	0.0874127	0.0581414	0.0531549	0.0819399	0.0612898	0.109437	0.058341	0.0697639
cg05973813	ACAT1	Island	TSS200	0.0258895	0.0236095	0.0227243	0.0233031	0.0336518	0.0195908	0.0188201	0.01949	0.0233849	0.0148386	0.0237375	0.0239321	0.0320738	0.0346477	0.0249091	0.0305381	0.0207642	0.0256801
cg08152564	ACAT1	Island	TSS1500	0.0225389	0.04769	0.0456954	0.0498174	0.0470497	0.0367908	0.0312828	0.0383407	0.0399007	0.0578474	0.0342847	0.0407387	0.035128	0.0646533	0.0433811	0.0368696	0.0377391	0.0438302
cg14338017	ACAT1	N_Shore	TSS1500	0.926182	0.937796	0.892559	0.930959	0.940579	0.947874	0.936614	0.933269	0.930729	0.950076	0.937371	0.927955	0.937994	0.937313	0.933719	0.949548	0.938672	0.939081
cg14994056	ACAT1	Island	TSS1500	0.0526973	0.0548547	0.05544	0.0664949	0.0529321	0.0525078	0.0429701	0.0435388	0.0526795	0.032479	0.0550406	0.044229	0.037335	0.0565584	0.0427966	0.0464744	0.055414	0.0462909
cg18337422	ACAT1	Island	TSS200	0.0129054	0.0164379	0.0128095	0.014303	0.0142152	0.0138709	0.0125498	0.0134978	0.0138237	0.0163656	0.01535	0.0132691	0.0149924	0.0193049	0.0145931	0.00963715	0.0133072	0.0146024
cg19958696	ACAT1	Island	TSS200	0.00958392	0.013798	0.0151371	0.0130103	0.0145146	0.0141372	0.0121108	0.0135524	0.0132305	0.0146365	0.0114584	0.0133948	0.0127725	0.0188806	0.0153866	0.0101743	0.0127935	0.0136872
cg24341800	ACAT1	Island	TSS200	0.040105	0.0298933	0.0337645	0.0460355	0.0241267	0.0283102	0.0292665	0.0270525	0.0323193	0.0556596	0.0273422	0.0299729	0.0383269	0.0568871	0.0300675	0.0239073	0.0344093	0.0370716
cg26694605	ACAT1	N_Shore	TSS1500	0.677106	0.746343	0.763762	0.772023	0.626593	0.729431	0.806779	0.73009	0.731516	0.81993	0.700089	0.765244	0.70541	0.704705	0.77003	0.73197	0.75535	0.744091
	ACAT1											0.17645									0.179316
cg00610211	ACAT2	Island	TSS200;TSS200;Body	0.0318454	0.0464832	0.0531459	0.0570183	0.0419948	0.033068	0.0341885	0.0323665	0.0412638	0.0327688	0.261726	0.0365151	0.0434185	0.0686017	0.0434838	0.0237858	0.0403875	0.0688359
cg06131755	ACAT2	Island	TSS1500	0.126154	0.0843786	0.292645	0.140386	0.0921206	0.0404977	0.172732	0.060691	0.126201	0.0598242	0.226185	0.115857	0.0624943	0.171093	0.158924	0.030865	0.0836473	0.113611
cg09718295	ACAT2	Island	TSS200	0.0289682	0.0279036	0.0352755	0.0518877	0.0284623	0.0234243	0.0267409	0.0272885	0.0312439	0.0162884	0.33962	0.0267981	0.047406	0.0317603	0.0326997	0.0269254	0.0291284	0.0688283
cg10432632	ACAT2	Island	TSS200	0.0255619	0.0341287	0.0293201	0.029571	0.0283733	0.0255882	0.0274309	0.0196429	0.0274521	0.0782189	0.21252	0.0230786	0.0468813	0.0572516	0.0246122	0.0256186	0.0239916	0.0615216
cg11366901	ACAT2	Island	TSS200	0.0205039	0.0156384	0.0168581	0.0240502	0.0192728	0.0168027	0.0171194	0.0155808	0.0182283	0.0139609	0.100398	0.0157768	0.0148238	0.0273486	0.0148382	0.0106062	0.0126072	0.026295
cg13804918	ACAT2	Island	TSS200	0.00959173	0.011089	0.0110472	0.017696	0.00910567	0.00724743	0.00987101	0.0107778	0.0108032	0.00825868	0.148385	0.0106951	0.0115577	0.0143529	0.00962883	0.00695363	0.0100921	0.0274905
cg14145175	ACAT2	Island	TSS200;TSS200;Body	0.0210603	0.0222138	0.0197765	0.0449616	0.0215242	0.0153963	0.0164861	0.0214527	0.0228589	0.0350327	0.329707	0.0253464	0.033954	0.0271907	0.0192792	0.0121928	0.0263703	0.0636341
cg15298323	ACAT2	Island	TSS1500	0.162763	0.166503	0.372833	0.259177	0.17053	0.173837	0.247711	0.206611	0.219996	0.202966	0.442519	0.244608	0.166888	0.289436	0.267208	0.168089	0.141269	0.240373
cg18959411	ACAT2	Island	TSS200	0.0336211	0.029315	0.0197235	0.0323931	0.0154037	0.0220006	0.0276227	0.0162462	0.0245407	0.0539972	0.17359	0.0167438	0.0646492	0.0324615	0.0191202	0.0211944	0.0184559	0.0500265
cg18967713	ACAT2	Island	TSS200;TSS200;Body	0.0162152	0.0202159	0.014205	0.0255622	0.0132014	0.0134146	0.0113287	0.0135452	0.015961	0.0194337	0.27427	0.0158661	0.0170365	0.0222944	0.015496	0.00891747	0.0196941	0.049126
	ACAT2											0.0538548									0.0769742
cg00396407	ACBD3	Island	TSS1500	0.0102971	0.0134408	0.0124266	0.0120139	0.0108802	0.00959885	0.00991808	0.0102071	0.0110978	0.0092249	0.0116924	0.0113782	0.00985863	0.0152095	0.0116698	0.00853128	0.0112494	0.0111018
cg02583796	ACBD3	S_Shore	TSS1500	0.877655	0.915615	0.82166	0.881088	0.864109	0.921707	0.86801	0.879519	0.87867	0.891049	0.90286	0.891739	0.885423	0.895529	0.904264	0.874665	0.907844	0.894172
cg04210991	ACBD3	Island	TSS200	0.0303047	0.0630673	0.0472072	0.0759412	0.0544851	0.0536391	0.0506008	0.0440314	0.0524096	0.0403781	0.0463087	0.0540277	0.0511043	0.0691635	0.0534606	0.0633925	0.0550115	0.0541059
cg06314646	ACBD3	Island	TSS200	0.0708872	0.0912092	0.100369	0.139911	0.0933912	0.0793433	0.0619184	0.0591052	0.0870168	0.041447	0.075146	0.0799021	0.0861191	0.134406	0.0816715	0.0485979	0.0553598	0.0753312
cg14428916	ACBD3	S_Shore	TSS1500	0.908651	0.927989	0.90954	0.921204	0.923672	0.930525	0.924536	0.921226	0.920918	0.9417	0.926137	0.915356	0.923048	0.918931	0.926714	0.93678	0.941022	0.928711
cg14971781	ACBD3	Island	TSS1500	0.0205016	0.0221745	0.0190451	0.0223653	0.0218008	0.0175308	0.0157602	0.0189507	0.0197661	0.0320662	0.0191955	0.0151087	0.0352656	0.0288872	0.0161373	0.013617	0.0202726	0.0225688
cg20786939	ACBD3	Island	TSS200	0.0317101	0.0339307	0.0326297	0.0369926	0.0435673	0.0168568	0.0296333	0.0256071	0.031366	0.0604645	0.0243665	0.0281861	0.0569388	0.0479711	0.0395908	0.0250285	0.0249737	0.03844
cg21144374	ACBD3	S_Shore	TSS1500	0.941861	0.964138	0.948502	0.957485	0.955406	0.951772	0.953868	0.958349	0.953923	0.959153	0.953217	0.95391	0.95288	0.949952	0.944138	0.954197	0.958241	0.953211
cg22640114	ACBD3	Island	TSS200	0.0250678	0.0241412	0.0255753	0.023736	0.0255322	0.0238965	0.0182965	0.0257902	0.0240045	0.01742	0.0258693	0.0275575	0.0238099	0.0282864	0.0272053	0.0184006	0.0251208	0.0242087
cg24386571	ACBD3	Island	TSS200	0.0145232	0.0179865	0.0169378	0.0256095	0.0155929	0.0159662	0.0136321	0.0143584	0.0168258	0.0151817	0.0159594	0.0163807	0.018966	0.0220585	0.0174968	0.0144156	0.0169771	0.0171795
	ACBD3											0.2996									0.301903
cg03247834	ACBD4	S_Shelf	TSS200;TSS200;TSS200;TSS200;5'UTR	0.0375493	0.0325613	0.0284004	0.0337893	0.0274583	0.0329038	0.0298606	0.029033	0.0314445	0.0208617	0.0297646	0.0313581	0.0260985	0.0344951	0.0309238	0.0269347	0.0312843	0.0289651
cg05895930	ACBD4	S_Shelf	TSS200;TSS200;TSS200;TSS200;5'UTR	0.0398877	0.0304379	0.0344745	0.0356177	0.0314806	0.0306077	0.0322168	0.0280755	0.0328498	0.0236058	0.0334396	0.0324195	0.0309033	0.0360382	0.0314854	0.0281841	0.0317884	0.030983
cg10852358	ACBD4	S_Shore	TSS1500;TSS1500;5'UTR;TSS1500;TSS1500	0.055865	0.0481792	0.0391471	0.0433294	0.0261066	0.0313743	0.0346505	0.0299176	0.0385712	0.0569809	0.0280057	0.0313822	0.0779694	0.0740696	0.0401974	0.0315192	0.0334274	0.046694
cg14023780	ACBD4	S_Shelf	5'UTR;TSS1500;TSS1500;TSS1500;TSS1500	0.0283195	0.0242578	0.0260682	0.0284537	0.0245119	0.0420162	0.0296755	0.0226429	0.0282432	0.0386791	0.0240696	0.018816	0.0354828	0.0363946	0.0205054	0.0221065	0.0210859	0.0271425
cg18909469	ACBD4	S_Shelf	TSS200;TSS200;TSS200;TSS200;5'UTR	0.0111889	0.0162836	0.0136634	0.013417	0.015303	0.0129505	0.0129431	0.0141332	0.0137353	0.0165026	0.0131284	0.0154472	0.0153408	0.0240235	0.0132914	0.0116288	0.0154742	0.0156046
cg19727662	ACBD4	S_Shore	5'UTR;TSS1500;TSS1500;TSS1500;TSS1500	0.867614	0.890773	0.863363	0.878748	0.877491	0.882024	0.87233	0.864287	0.874579	0.885356	0.86209	0.850966	0.878834	0.896001	0.855136	0.872088	0.872215	0.871586
cg20139425	ACBD4	S_Shelf	TSS200;TSS200;TSS200;TSS200;5'UTR	0.0433179	0.0334608	0.0299	0.0467308	0.0325831	0.0357294	0.0304376	0.0199343	0.0340117	0.0891899	0.0170514	0.0255317	0.0544944	0.0603426	0.034599	0.0474759	0.0259932	0.0443348
cg21695836	ACBD4	S_Shelf	TSS1500;TSS1500;5'UTR;TSS1500;TSS1500	0.0184348	0.021872	0.0197619	0.0238316	0.0218707	0.0175662	0.0208598	0.0173615	0.0201948	0.0248035	0.0171637	0.021647	0.0226432	0.028017	0.01729	0.017368	0.0179574	0.0208612
cg24839693	ACBD4	S_Shelf	TSS200;TSS200;TSS200;TSS200;5'UTR	0.0450496	0.0383255	0.0406116	0.0488757	0.037917	0.0411697	0.0511145	0.0297824	0.0416057	0.0769914	0.0227494	0.0376739	0.0572618	0.0610407	0.0455923	0.0434917	0.029833	0.0468293
	ACBD4											0.123915									0.125889
cg02859644	ACBD5	Island	TSS1500;TSS1500	0.0865499	0.0689647	0.0577324	0.0722595	0.0495181	0.0672214	0.0814691	0.0815208	0.0706545	0.103769	0.0808478	0.0852933	0.029934	0.100761	0.0144652	0.0598602	0.0762727	0.0689004
cg08715142	ACBD5	Island	TSS200;TSS1500;TSS200	0.0116541	0.0152587	0.0143873	0.0141782	0.0130062	0.0120711	0.0117204	0.0122667	0.0130678	0.0149862	0.0143138	0.0145894	0.0186837	0.0230018	0.012689	0.00886424	0.0121415	0.0149087
cg09219177	ACBD5	Island	TSS200;TSS1500;TSS200	0.0260456	0.0303061	0.0226826	0.0280451	0.0230054	0.0255459	0.0252563	0.0257995	0.0258358	0.024743	0.0249506	0.0203353	0.0443959	0.0505728	0.0240958	0.0236812	0.0225905	0.0294206
cg14240646	ACBD5	S_Shore	TSS1500;TSS1500	0.329156	0.465527	0.376106	0.467106	0.157562	0.49	0.346526	0.344189	0.372022	0.722618	0.484502	0.384114	0.493041	0.662948	0.331544	0.0772387	0.130322	0.410791
cg18691565	ACBD5	Island	TSS1500;TSS1500	0.103613	0.078368	0.0922512	0.100603	0.112647	0.136921	0.0917054	0.0875345	0.100455	0.190597	0.0944006	0.0942604	0.0760614	0.121442	0.0970952	0.184405	0.0919147	0.118772
cg23360149	ACBD5	Island	TSS200;TSS1500;TSS200	0.0288023	0.0387629	0.0273171	0.0341671	0.0286287	0.0256518	0.0221194	0.0249896	0.0288049	0.025298	0.0265843	0.0262459	0.0394615	0.047331	0.0287017	0.0285867	0.0263642	0.0310717
cg23568665	ACBD5	Island	TSS1500;TSS1500;TSS1500;TSS1500;TSS200;TSS200;TSS200	0.0254197	0.0275346	0.022072	0.0291978	0.0240103	0.0259513	0.0241828	0.0268017	0.0256463	0.0305543	0.0344608	0.028879	0.0250325	0.0374345	0.0263983	0.0170773	0.0218977	0.0277168
cg23656959	ACBD5	S_Shore	TSS1500;TSS1500;TSS1500	0.157598	0.128992	0.104863	0.188533	0.0340459	0.117253	0.126497	0.101443	0.119903	0.171148	0.115973	0.114391	0.122266	0.315567	0.0894478	0.0357111	0.0322721	0.124597
cg26510160	ACBD5	S_Shore	TSS1500;TSS1500;TSS1500	0.0471473	0.0359594	0.0442409	0.039155	0.041448	0.0377179	0.0343791	0.032355	0.0390503	0.0486333	0.0343978	0.0299058	0.0556521	0.0494853	0.0357711	0.0334039	0.0384108	0.0407075
	ACBD5											0.0883822									0.0963206
cg00223186	ACBD6	Island	TSS200	0.0266798	0.0273339	0.0282555	0.0343108	0.030875	0.0209814	0.0211413	0.022358	0.026492	0.125575	0.0212367	0.0231905	0.0462383	0.0389335	0.0256999	0.0248833	0.0275244	0.0416602
cg01874968	ACBD6	S_Shore	TSS1500	0.853682	0.878476	0.683484	0.854462	0.862137	0.662031	0.854632	0.831284	0.810023	0.879305	0.859163	0.758753	0.843487	0.84637	0.837411	0.830081	0.727846	0.822802
cg05087903	ACBD6	Island	TSS200	0.0374834	0.0385535	0.0313017	0.0454563	0.0426477	0.0424	0.0471979	0.0348738	0.0399893	0.0495193	0.0294378	0.0279382	0.0427691	0.0601595	0.0380436	0.0420502	0.0305965	0.0400643
cg08270031	ACBD6	Island	TSS200	0.0352165	0.0395158	0.0388541	0.0376309	0.0421241	0.0336557	0.0390118	0.0428092	0.0386023	0.283929	0.0680316	0.0345988	0.0501907	0.0540442	0.0397274	0.0280704	0.0349594	0.0741939
cg10696624	ACBD6	Island	TSS200	0.0565875	0.0338829	0.0423769	0.0493429	0.0438013	0.0458576	0.0468198	0.0277969	0.0433082	0.0531999	0.0251893	0.0373097	0.0967154	0.0624243	0.0399402	0.0335577	0.0312094	0.0474432
cg16358350	ACBD6	S_Shore	TSS1500	0.882188	0.91031	0.857459	0.896561	0.897105	0.893438	0.892605	0.903308	0.891622	0.863587	0.903731	0.872636	0.88327	0.892741	0.890319	0.913751	0.894096	0.889266
cg16690456	ACBD6	S_Shore	TSS1500	0.0237184	0.0255269	0.0249113	0.0264942	0.0234777	0.022945	0.0234226	0.0209234	0.0239274	0.0335805	0.024558	0.0235846	0.0383971	0.0368357	0.0293817	0.019062	0.0200186	0.0281773
cg18746224	ACBD6	S_Shore	TSS1500	0.0625492	0.0785431	0.0881293	0.0585393	0.0664495	0.0867413	0.0660727	0.0698138	0.0721048	0.242454	0.0833344	0.0560186	0.0961165	0.0822492	0.0518869	0.0602893	0.0571974	0.0911933
cg20824549	ACBD6	S_Shore	TSS1500	0.038924	0.0515341	0.0539879	0.0454077	0.0381179	0.0450897	0.0486205	0.0470348	0.0460896	0.2619	0.0553955	0.0457754	0.0592655	0.0655346	0.0373707	0.0397716	0.0402066	0.0756525
cg25352856	ACBD6	Island	TSS200	0.0457962	0.0435308	0.0264196	0.0305731	0.02691	0.0238006	0.0359538	0.0216168	0.0318251	0.123211	0.0226058	0.0242484	0.100588	0.061797	0.0371547	0.0277469	0.0257366	0.052886
	ACBD6											0.202398									0.216334
cg02317321	ACBD7	S_Shore	TSS1500	0.0865872	0.0479169	0.0754047	0.0728796	0.0765824	0.0781716	0.0514939	0.0508311	0.0674834	0.214907	0.0360094	0.0731518	0.156965	0.0673789	0.0737546	0.0654428	0.0536199	0.0926537
cg02524277	ACBD7	Island	TSS200	0.0166516	0.0175794	0.017738	0.0205148	0.0180295	0.0161462	0.0147754	0.0176116	0.0173808	0.0183351	0.0157546	0.0151654	0.017704	0.0409998	0.0183088	0.0148463	0.0164696	0.019698
cg03408893	ACBD7	Island	TSS200	0.0432154	0.0443939	0.0328272	0.045273	0.0506846	0.0343441	0.0338825	0.022605	0.0384032	0.0667918	0.0272571	0.0364669	0.0657021	0.0804564	0.0407615	0.0352215	0.0318322	0.0480612
cg07386270	ACBD7	S_Shore	TSS1500	0.916251	0.927214	0.912174	0.917533	0.925459	0.925341	0.918279	0.917321	0.919947	0.845543	0.929426	0.90429	0.924961	0.920971	0.889344	0.916668	0.923918	0.90689
cg08315834	ACBD7	Island	TSS200	0.0453703	0.0463529	0.053435	0.0608316	0.0369601	0.0417189	0.0298824	0.0337807	0.0435415	0.0851865	0.0290731	0.0319623	0.0806462	0.0987946	0.0467228	0.0295897	0.0311996	0.0541469
cg09814117	ACBD7	S_Shore	TSS1500	0.843228	0.888609	0.87823	0.847966	0.873527	0.858233	0.861211	0.872882	0.865486	0.770351	0.865946	0.839122	0.85398	0.865374	0.813122	0.808202	0.872552	0.836081
cg12009856	ACBD7	S_Shore	TSS1500	0.797745	0.687065	0.709239	0.69736	0.793378	0.800744	0.775698	0.663633	0.740608	0.677529	0.742463	0.730331	0.7201	0.762974	0.5617	0.755245	0.78937	0.717464
cg14841842	ACBD7	Island	TSS200	0.0299619	0.0228148	0.0247952	0.0303649	0.0248234	0.02445	0.0200537	0.0247668	0.0252538	0.0187087	0.0235635	0.0235968	0.0245431	0.0332391	0.0337243	0.0371974	0.0237801	0.0272941
cg25695166	ACBD7	S_Shore	TSS1500	0.0231573	0.0247682	0.0192767	0.0278982	0.0252212	0.0192508	0.0214891	0.0200247	0.0226358	0.0209213	0.0164918	0.0220729	0.0235094	0.0297637	0.0296709	0.0250883	0.0178817	0.023175
	ACBD7											0.304527									0.302829
cg02423064	ACCN1	Island	TSS200	0.152368	0.146504	0.188379	0.197509	0.190233	0.430289	0.155813	0.169098	0.203774	0.343828	0.459943	0.283514	0.345944	0.176368	0.307703	0.354722	0.299404	0.321428
cg07142461	ACCN1	N_Shore	TSS200	0.102211	0.176271	0.109977	0.125682	0.0989748	0.346947	0.0928516	0.093684	0.143325	0.184996	0.289725	0.117297	0.201427	0.125088	0.100006	0.311276	0.144579	0.184299
cg09152943	ACCN1	N_Shore	TSS200	0.0795824	0.0730939	0.0670314	0.0871179	0.0854793	0.242163	0.0640751	0.0381725	0.0920894	0.125299	0.208291	0.0847209	0.127534	0.0824195	0.0690072	0.258677	0.0553373	0.126411
cg12810096	ACCN1	Island	TSS1500	0.025915	0.043835	0.0974094	0.0361306	0.0380746	0.466313	0.0281486	0.0365695	0.0965495	0.197367	0.298293	0.273832	0.238784	0.100362	0.117565	0.13735	0.162144	0.190712
cg13298963	ACCN1	N_Shore	TSS200	0.0549428	0.119343	0.0890415	0.0920409	0.0776293	0.342568	0.0550138	0.0671187	0.112212	0.15672	0.303331	0.0995755	0.116038	0.0939927	0.0601059	0.205658	0.121087	0.144564
cg14603098	ACCN1	Island	TSS1500	0.0687647	0.0549246	0.0822603	0.0594544	0.0759264	0.626029	0.0341001	0.0503646	0.131478	0.27899	0.244989	0.216986	0.332463	0.0772154	0.404711	0.348417	0.17861	0.260298
cg19942495	ACCN1	Island	TSS1500	0.268406	0.325512	0.314992	0.325644	0.365414	0.603086	0.265657	0.310447	0.347395	0.455433	0.526434	0.438393	0.476687	0.321589	0.516791	0.455253	0.380518	0.446387
cg23976464	ACCN1	N_Shore	TSS200	0.0559866	0.0469732	0.0496156	0.0590354	0.0600086	0.379022	0.0613844	0.0399338	0.093995	0.0919738	0.335151	0.0394243	0.0905461	0.0458787	0.0459522	0.153372	0.0670253	0.108665
cg24613080	ACCN1	Island	TSS1500	0.176619	0.17474	0.285345	0.22648	0.346822	0.657146	0.200354	0.247755	0.289408	0.43993	0.582022	0.529272	0.535502	0.295402	0.593057	0.556166	0.453309	0.498083
cg25033990	ACCN1	Island	TSS200	0.103773	0.131907	0.174718	0.187303	0.198858	0.498884	0.134383	0.146273	0.197012	0.404667	0.483827	0.353842	0.379159	0.234399	0.367608	0.343965	0.301734	0.35865
cg25304405	ACCN1	S_Shore	TSS1500	0.545993	0.742062	0.42261	0.441355	0.683734	0.273335	0.671354	0.458419	0.529858	0.266308	0.216521	0.35762	0.43158	0.618216	0.27585	0.303953	0.530717	0.375096
	ACCN1											0.203372									0.274054
cg00996690	ACCN2	N_Shore	TSS1500;TSS1500	0.0415159	0.0346938	0.0424208	0.0480523	0.0432342	0.0465907	0.034274	0.0382704	0.0411315	0.0293397	0.0362049	0.0412476	0.0346132	0.0405195	0.0381901	0.0314278	0.0380783	0.0362026
cg12351140	ACCN2	Island	TSS200;TSS200	0.00989299	0.0130173	0.0118135	0.0133881	0.0129769	0.0108774	0.0113024	0.0106875	0.0117445	0.0104364	0.0118674	0.0105586	0.0112389	0.0168798	0.0123292	0.00714627	0.0112641	0.0114651
cg17948386	ACCN2	Island	TSS1500;TSS1500	0.0357504	0.0528036	0.033538	0.0430769	0.032297	0.0281476	0.0321449	0.0243625	0.0352651	0.104568	0.0263567	0.0283253	0.0870421	0.0867141	0.0336729	0.0271528	0.0272561	0.052636
cg19657723	ACCN2	Island	TSS200;TSS200	0.0103805	0.0120023	0.0108881	0.0110067	0.0102948	0.0089839	0.00950951	0.0121386	0.0106506	0.00947486	0.00952092	0.0102641	0.0128011	0.0146715	0.0108878	0.00777279	0.00954379	0.0106171
cg21669272	ACCN2	Island	TSS200;TSS200	0.0200402	0.0225924	0.0210314	0.0261192	0.0259573	0.0312036	0.0231946	0.0196508	0.0237237	0.0252833	0.0229795	0.023495	0.0272279	0.0387237	0.0211742	0.0198479	0.0224667	0.0251498
cg22052758	ACCN2	N_Shore	TSS1500;TSS1500	0.166614	0.185857	0.163729	0.025776	0.173485	0.159519	0.241537	0.182857	0.162422	0.22635	0.00531541	0.169568	0.173045	0.0270594	0.126987	0.204348	0.0938505	0.128315
cg23126949	ACCN2	N_Shore	TSS1500;TSS1500	0.0154638	0.0527615	0.0510494	0.0539861	0.0576697	0.0489351	0.0674167	0.0462724	0.0491943	0.115592	0.0425218	0.0499249	0.0571388	0.0765285	0.0435673	0.0412753	0.0432036	0.058719
cg23382700	ACCN2	N_Shore	TSS1500;TSS1500	0.149066	0.0215747	0.187531	0.19556	0.162259	0.188254	0.232799	0.185826	0.165359	0.25504	0.117262	0.165161	0.250343	0.199927	0.0788762	0.170746	0.203952	0.180163
	ACCN2											0.0624363									0.0629086
cg00533407	ACCN3	N_Shore	TSS1500;TSS1500;TSS1500	0.259306	0.194571	0.377487	0.283982	0.283346	0.293025	0.232923	0.286112	0.276344	0.339249	0.280572	0.216035	0.197485	0.242033	0.216888	0.206323	0.209719	0.238538
cg01106572	ACCN3	N_Shore	TSS1500;TSS1500;3'UTR;TSS1500	0.397688	0.446444	0.518434	0.429608	0.438586	0.586542	0.428365	0.40328	0.456118	0.683079	0.569143	0.561416	0.538496	0.433185	0.603295	0.521523	0.491681	0.550227
cg01624004	ACCN3	N_Shore	TSS200;TSS200;TSS200	0.633703	0.711401	0.6413	0.727792	0.654625	0.670909	0.578373	0.627548	0.655706	0.570201	0.637942	0.581301	0.695887	0.63536	0.611437	0.649229	0.551292	0.616581
cg07243147	ACCN3	N_Shore	TSS1500;TSS1500;3'UTR;TSS1500	0.224651	0.177361	0.271908	0.22931	0.208907	0.290844	0.221118	0.224541	0.23108	0.381915	0.378126	0.328205	0.351095	0.214047	0.29946	0.277402	0.214265	0.305564
cg12513221	ACCN3	N_Shore	TSS1500;TSS1500;3'UTR;TSS1500	0.17644	0.209001	0.211703	0.192665	0.223532	0.220608	0.193866	0.11916	0.193372	0.343321	0.213794	0.161333	0.154887	0.234982	0.167237	0.185504	0.165911	0.203371
cg21101226	ACCN3	N_Shore	TSS200;TSS200;TSS200	0.738387	0.84816	0.758262	0.816826	0.806053	0.712514	0.770836	0.771814	0.777856	0.725003	0.774926	0.80245	0.7776	0.799677	0.757563	0.738047	0.831757	0.775878
	ACCN3											0.431746									0.44836
cg02529035	ACCN4	Island	TSS1500;TSS1500	0.245512	0.261866	0.208023	0.226607	0.224049	0.353117	0.304925	0.244662	0.258595	0.2671	0.401003	0.290497	0.308269	0.271912	0.175822	0.329078	0.263303	0.288373
cg04114655	ACCN4	N_Shore	TSS1500;TSS1500	0.542174	0.497941	0.453851	0.473262	0.575696	0.511885	0.580145	0.481394	0.514544	0.57395	0.707198	0.477413	0.551655	0.571673	0.376049	0.58155	0.502475	0.542745
cg04576568	ACCN4	Island	TSS1500;TSS1500	0.40541	0.249892	0.35252	0.33286	0.360166	0.460336	0.510968	0.269754	0.367738	0.375511	0.600502	0.289249	0.249225	0.464379	0.269852	0.532943	0.377522	0.394898
cg11248254	ACCN4	S_Shore	TSS1500;TSS1500	0.414858	0.406384	0.321214	0.391187	0.399474	0.553044	0.459884	0.407813	0.419232	0.510813	0.581499	0.428158	0.436438	0.49025	0.353456	0.506897	0.460542	0.471007
cg24586121	ACCN4	Island	TSS1500;TSS1500	0.40958	0.381739	0.329799	0.332261	0.40501	0.417855	0.503628	0.317745	0.387202	0.383242	0.504706	0.425484	0.388566	0.486048	0.284556	0.544312	0.353855	0.421346
	ACCN4											0.389462									0.423674
cg05385306	ACCN5		TSS1500	0.763761	0.885351	0.745623	0.820216	0.79972	0.87401	0.798752	0.76796	0.806924	0.867147	0.811708	0.727116	0.678123	0.800418	0.704961	0.826017	0.779558	0.774381
cg14401592	ACCN5		TSS1500	0.553434	0.85313	0.691508	0.725508	0.759298	0.83731	0.68554	0.714866	0.727574	0.762274	0.722967	0.650509	0.597141	0.731069	0.589136	0.660407	0.752539	0.683255
	ACCN5											0.767249									0.728818
cg03856109	ACCS	Island	TSS200;TSS200	0.106575	0.0576368	0.0502307	0.0659968	0.0555212	0.0749777	0.046885	0.0377251	0.0619435	0.462041	0.196137	0.0581066	0.0995993	0.173061	0.0595423	0.390914	0.0457153	0.18564
cg09339476	ACCS	N_Shore	TSS1500;TSS1500	0.0287085	0.025906	0.0295604	0.035806	0.0273756	0.032113	0.0295841	0.0296946	0.0298435	0.428875	0.165255	0.0563809	0.0377669	0.0444777	0.0799032	0.109824	0.0293399	0.118978
cg11200965	ACCS	Island	TSS200;TSS200	0.017726	0.0182871	0.0214793	0.0202987	0.0181643	0.0191019	0.0160617	0.0191786	0.0187872	0.413452	0.221899	0.0201568	0.0180107	0.0378284	0.0198648	0.307888	0.0188326	0.132242
cg11598954	ACCS	N_Shore	TSS1500;TSS1500	0.880272	0.900874	0.869846	0.874532	0.86382	0.874059	0.90835	0.897147	0.883612	0.880473	0.848532	0.860823	0.829058	0.86974	0.884489	0.907965	0.870656	0.868967
cg12287025	ACCS	Island	TSS200;TSS1500	0.0128923	0.0119453	0.0124462	0.0125443	0.012544	0.0130588	0.0118208	0.0133065	0.0125698	0.384597	0.225041	0.0117531	0.010254	0.0355673	0.0145214	0.312129	0.0111084	0.125621
cg12867237	ACCS	Island	TSS200;TSS1500	0.0213686	0.0204998	0.0198907	0.0220962	0.0228599	0.0187348	0.0167574	0.019391	0.0201998	0.14723	0.110462	0.0244742	0.026531	0.0266106	0.0382875	0.0855917	0.0226923	0.0602349
cg16963683	ACCS	Island	TSS200;TSS200	0.0268538	0.0255896	0.0353194	0.0300959	0.0324107	0.0231505	0.0321413	0.0217773	0.0284173	0.392537	0.23187	0.0338662	0.0319848	0.0931168	0.0275152	0.263989	0.0226305	0.137189
cg18265608	ACCS	N_Shore	TSS1500;TSS1500	0.174914	0.153694	0.301389	0.19941	0.248096	0.540899	0.174376	0.183368	0.247018	0.544605	0.611943	0.407562	0.497462	0.27036	0.475292	0.383883	0.254112	0.430652
cg20240860	ACCS	N_Shore	TSS1500;TSS1500	0.090996	0.0530224	0.126155	0.0935792	0.076047	0.168835	0.0698323	0.0601535	0.0923275	0.528844	0.357785	0.190829	0.14923	0.133469	0.240159	0.290501	0.0938321	0.248081
	ACCS											0.154969									0.2564
cg03187671	ACCSL		TSS1500	0.849933	0.882901	0.787312	0.865772	0.879924	0.867865	0.876014	0.873085	0.860351	0.885551	0.876531	0.782067	0.854681	0.800056	0.676236	0.886674	0.859033	0.827604
cg08403064	ACCSL		TSS1500	0.761129	0.739088	0.597407	0.682928	0.684587	0.822044	0.683398	0.710722	0.710163	0.57667	0.838221	0.645829	0.660896	0.756343	0.600257	0.820786	0.721263	0.702533
cg14686207	ACCSL		TSS1500	0.286254	0.50384	0.392768	0.403297	0.401131	0.44941	0.381587	0.302749	0.39013	0.354036	0.485472	0.267788	0.292106	0.374221	0.27352	0.358161	0.388232	0.349192
cg15035528	ACCSL		TSS1500	0.871345	0.908581	0.855512	0.881108	0.844492	0.877505	0.908317	0.8511	0.874745	0.730548	0.832727	0.791204	0.802601	0.815493	0.666462	0.881349	0.774075	0.786807
cg18438614	ACCSL		TSS1500	0.682869	0.803804	0.675836	0.691209	0.691685	0.740172	0.714421	0.650756	0.706344	0.737239	0.805271	0.604192	0.701376	0.676131	0.528194	0.717905	0.745786	0.689512
	ACCSL											0.708346									0.67113
cg04265926	ACD	Island	TSS1500;TSS1500;1stExon;TSS1500;1stExon	0.0107878	0.0204412	0.0131453	0.0173221	0.0122093	0.0100881	0.00998129	0.0130335	0.0133761	0.0161812	0.0124635	0.0133291	0.0185226	0.0528007	0.017142	0.00882611	0.0135816	0.0191059
cg06287927	ACD	Island	TSS1500;TSS1500;1stExon;TSS1500;1stExon	0.0108483	0.0147284	0.00998991	0.0103878	0.00987596	0.00925083	0.0101958	0.00936008	0.0105796	0.0129221	0.0094149	0.0102257	0.0118969	0.0292878	0.0107802	0.00729824	0.00888978	0.0125895
cg08834429	ACD	Island	TSS200;TSS200;5'UTR;5'UTR;1stExon;TSS200;1stExon	0.0199417	0.016002	0.0152565	0.0133392	0.0147728	0.0109126	0.010473	0.0138782	0.014322	0.0121544	0.0168758	0.0128813	0.0122418	0.0164579	0.0183044	0.013174	0.0131556	0.0144057
	ACD											0.0127592									0.015367
cg02040921	ACE	Island	TSS200	0.0092984	0.0140779	0.0129741	0.0151685	0.0157779	0.0122111	0.00941266	0.0123662	0.0126608	0.00916078	0.0118723	0.0103708	0.0099155	0.0188452	0.0143758	0.00880878	0.0126263	0.0119969
cg02131967	ACE	Island	TSS1500	0.0182221	0.0183262	0.0189433	0.0174622	0.0183668	0.569001	0.0400757	0.0168129	0.0896513	0.45424	0.438059	0.455739	0.46571	0.16235	0.455993	0.49635	0.27162	0.400008
cg02440279	ACE	Island	TSS200	0.0103052	0.0126217	0.0110036	0.0132645	0.011147	0.00310659	0.00962356	0.0103761	0.010181	0.0106603	0.0111301	0.00949743	0.0103352	0.015484	0.0105861	0.00807116	0.011802	0.0109458
cg05952120	ACE	Island	TSS200	0.0362367	0.0225621	0.023187	0.0243618	0.032454	0.0307798	0.0145191	0.018612	0.0253391	0.024237	0.0285699	0.0220994	0.0138989	0.0234765	0.0274491	0.0278287	0.0213164	0.0236095
cg07114383	ACE		TSS1500;TSS1500;Body	0.729462	0.82793	0.747818	0.819038	0.793184	0.833555	0.773408	0.818313	0.792839	0.800448	0.818583	0.74697	0.787817	0.805663	0.781065	0.797676	0.835437	0.796707
cg09920557	ACE	Island	TSS1500	0.01292	0.0140662	0.0142335	0.0165776	0.0165726	0.590928	0.0577807	0.0155422	0.0923276	0.372317	0.38725	0.29499	0.392172	0.0983309	0.378789	0.352432	0.190234	0.308314
cg15387403	ACE	N_Shore	TSS1500	0.715211	0.81277	0.73416	0.829334	0.710104	0.839743	0.769969	0.832209	0.780437	0.881178	0.854628	0.795609	0.761845	0.705619	0.789481	0.783257	0.784268	0.794486
cg17575471	ACE		TSS1500;TSS1500;Body	0.747319	0.815897	0.703837	0.765522	0.744246	0.865545	0.757151	0.793098	0.774077	0.760181	0.876122	0.76296	0.834851	0.806538	0.777543	0.852956	0.824306	0.811932
cg19354750	ACE	Island	TSS200	0.0504887	0.0295178	0.0332843	0.034249	0.0397204	0.0383468	0.0238254	0.0313831	0.0351019	0.0126021	0.0388933	0.0302836	0.0434291	0.033897	0.0353842	0.0398317	0.0321577	0.0333098
cg20512652	ACE		TSS1500;TSS1500;Body	0.823555	0.920437	0.788863	0.912465	0.882861	0.912207	0.854024	0.890261	0.873084	0.876567	0.914406	0.815585	0.886991	0.873722	0.856148	0.836765	0.909468	0.871207
cg24189328	ACE	N_Shore	TSS1500	0.696422	0.711521	0.634504	0.712575	0.620749	0.886269	0.71615	0.732688	0.71386	0.82816	0.865912	0.755024	0.841851	0.698291	0.754993	0.710608	0.752675	0.775939
cg25054907	ACE	Island	TSS1500	0.0831681	0.0517051	0.0603493	0.0643056	0.0651443	0.491683	0.120747	0.0391604	0.122033	0.444912	0.41426	0.30974	0.390617	0.154242	0.321213	0.34517	0.238371	0.327316
	ACE											0.360133									0.430481
cg08559914	ACE2		TSS200	0.803153	0.838118	0.776201	0.843999	0.860594	0.837686	0.804744	0.774116	0.817326	0.682895	0.822097	0.743172	0.740425	0.827279	0.839314	0.85788	0.836333	0.793674
cg18458833	ACE2		TSS1500	0.847559	0.896183	0.848201	0.901232	0.877727	0.872009	0.871055	0.867989	0.872744	0.873904	0.850986	0.864472	0.852922	0.905629	0.89958	0.926274	0.867356	0.88014
cg18877734	ACE2		TSS1500	0.873827	0.913625	0.862875	0.892122	0.875267	0.89021	0.900101	0.889148	0.887147	0.851204	0.893115	0.868377	0.884752	0.891808	0.885837	0.916597	0.915237	0.888366
cg21598868	ACE2		TSS1500	0.874552	0.894775	0.846391	0.889183	0.884951	0.895794	0.90065	0.845666	0.878995	0.871336	0.887461	0.85474	0.894071	0.906499	0.907881	0.93022	0.888306	0.892564
	ACE2											0.864053									0.863686
cg02665611	ACER1		TSS1500	0.92943	0.942184	0.918868	0.913635	0.935192	0.945513	0.95073	0.940173	0.934466	0.922513	0.944071	0.925068	0.927192	0.925872	0.895335	0.921729	0.936128	0.924739
cg09150188	ACER1		TSS200	0.370865	0.370289	0.440251	0.443365	0.43128	0.338752	0.400187	0.374714	0.396213	0.347533	0.302785	0.32118	0.306818	0.41486	0.34922	0.322274	0.375578	0.342531
cg12861092	ACER1		TSS1500	0.755885	0.825899	0.712341	0.844428	0.792916	0.647102	0.815687	0.774721	0.771122	0.830759	0.573708	0.752449	0.579492	0.840009	0.761863	0.835364	0.735478	0.73864
cg13357330	ACER1		TSS1500	0.682938	0.676869	0.642128	0.619059	0.718001	0.725032	0.68982	0.605997	0.669981	0.591364	0.599728	0.660653	0.660808	0.66519	0.517256	0.611581	0.662835	0.621177
cg17667294	ACER1		TSS200	0.570557	0.624931	0.608634	0.645838	0.661536	0.390427	0.628546	0.633032	0.595438	0.483663	0.384507	0.405396	0.364976	0.675706	0.45862	0.465525	0.508131	0.468315
cg19440035	ACER1		TSS200	0.527483	0.644461	0.507421	0.579511	0.558586	0.369686	0.521585	0.529693	0.529803	0.409305	0.392865	0.378748	0.354562	0.583809	0.434302	0.473838	0.461094	0.436065
	ACER1											0.649504									0.588578
cg02616710	ACER2	Island	TSS1500	0.214721	0.322188	0.187766	0.29487	0.259893	0.110755	0.232655	0.277077	0.237491	0.256537	0.309286	0.192795	0.37349	0.292255	0.131699	0.114134	0.179659	0.231232
cg04674056	ACER2	Island	TSS200	0.0426819	0.0373742	0.048558	0.0610875	0.0431756	0.0261463	0.0393219	0.024684	0.0403787	0.0984782	0.0248693	0.026362	0.0286717	0.0624926	0.0419638	0.0444323	0.0300134	0.0446604
cg05211356	ACER2	N_Shore	TSS1500	0.789204	0.701666	0.718343	0.711192	0.684364	0.78503	0.711375	0.638778	0.717494	0.699036	0.647876	0.645971	0.714516	0.732614	0.737266	0.717659	0.671131	0.695759
cg08709434	ACER2	N_Shore	TSS1500	0.195463	0.334074	0.182761	0.324715	0.322356	0.130908	0.255335	0.264401	0.251252	0.262491	0.236462	0.237128	0.317022	0.281087	0.181007	0.134211	0.20331	0.23159
cg11382804	ACER2	Island	TSS200	0.0251279	0.0293981	0.0273407	0.0326598	0.0367768	0.0254357	0.0427066	0.0236763	0.0303902	0.0694045	0.0229866	0.0235518	0.0824678	0.0515838	0.0295085	0.0250362	0.0251941	0.0412167
cg13316803	ACER2	Island	TSS200	0.0359444	0.0323082	0.0356181	0.0367223	0.0385904	0.0431373	0.0327638	0.0401139	0.0368998	0.0241426	0.0383621	0.0373058	0.0327822	0.0515269	0.0384536	0.0350232	0.0351675	0.0365955
cg22370320	ACER2	N_Shore	TSS1500	0.826977	0.904647	0.796881	0.846388	0.869372	0.902444	0.872865	0.860103	0.85996	0.874593	0.856942	0.873578	0.819521	0.81006	0.760168	0.853807	0.854644	0.837914
cg22930031	ACER2	N_Shore	TSS1500	0.143248	0.249934	0.125764	0.240638	0.284593	0.0517155	0.114171	0.163599	0.171708	0.142289	0.251855	0.110161	0.298349	0.220516	0.0893731	0.0616971	0.133228	0.163434
	ACER2											0.293197									0.2853
cg02208432	ACER3	N_Shore	TSS1500	0.530745	0.591363	0.544393	0.476746	0.650762	0.862514	0.605783	0.446073	0.588547	0.862287	0.806467	0.721533	0.62593	0.542461	0.712772	0.860551	0.574328	0.713291
cg02385173	ACER3	N_Shore	TSS1500	0.652059	0.69382	0.812639	0.715168	0.779948	0.902564	0.70605	0.644389	0.73833	0.910945	0.859282	0.801198	0.721105	0.756505	0.823411	0.909965	0.762134	0.818068
cg08711063	ACER3	N_Shore	TSS1500	0.706308	0.659199	0.7186	0.652869	0.681877	0.884918	0.73333	0.680452	0.714694	0.866373	0.839168	0.77164	0.683012	0.727668	0.779813	0.82002	0.742119	0.778727
cg17838626	ACER3	N_Shore	TSS1500	0.0466477	0.0379254	0.0440992	0.0366819	0.0453732	0.0185123	0.0391889	0.0417028	0.0387664	0.0822163	0.0392862	0.0510591	0.0966485	0.0391185	0.0408008	0.0297873	0.0551551	0.054259
cg22181201	ACER3	N_Shore	TSS1500;TSS1500;TSS1500;TSS1500	0.245232	0.260934	0.298363	0.282374	0.224228	0.279381	0.33308	0.267594	0.273898	0.277457	0.250447	0.236815	0.231144	0.282378	0.215454	0.294151	0.317064	0.263114
	ACER3											0.470847									0.525492
cg02346098	ACHE	Island	5'UTR;TSS200;TSS200;TSS200;TSS200;1stExon	0.0149694	0.0152429	0.0171287	0.0172394	0.0165176	0.0141468	0.0115839	0.0148001	0.0152036	0.0136211	0.0142178	0.0147159	0.0156083	0.0207826	0.01544	0.0128503	0.0153511	0.0153234
cg02607340	ACHE	Island	TSS1500;TSS1500	0.0486672	0.0226113	0.0965608	0.0286068	0.0382453	0.0190784	0.0270909	0.0153683	0.0370286	0.02039	0.0126972	0.16873	0.01851	0.0287556	0.0128494	0.0105809	0.0658465	0.0422949
cg07069514	ACHE	Island	TSS1500;TSS1500	0.12086	0.186874	0.153959	0.128526	0.127777	0.0727076	0.0901237	0.0997458	0.122572	0.100027	0.152961	0.192658	0.157385	0.117267	0.0767751	0.13212	0.130022	0.132402
cg07634340	ACHE	Island	TSS1500;TSS1500	0.0635276	0.0769409	0.0497719	0.0579511	0.0607996	0.0568265	0.0717293	0.0361128	0.0592075	0.0957686	0.0413249	0.0580697	0.103927	0.0958089	0.0592814	0.0445752	0.0536814	0.0690546
cg11227411	ACHE	Island	TSS1500;TSS200;TSS1500;TSS1500;TSS1500	0.301278	0.296591	0.266538	0.354524	0.23332	0.278429	0.23404	0.255758	0.27756	0.202031	0.306587	0.251883	0.241758	0.3359	0.241691	0.321881	0.265336	0.270883
cg13235817	ACHE	Island	TSS1500;TSS1500	0.0188882	0.0163978	0.0223579	0.0214077	0.0204379	0.0194048	0.0159439	0.0196729	0.0193139	0.0141603	0.018173	0.0179938	0.0181175	0.02113	0.018483	0.0145847	0.0203601	0.0178753
cg17731261	ACHE	Island	TSS1500;TSS1500	0.041219	0.0285393	0.0365812	0.0274595	0.0347097	0.0259139	0.0180542	0.017986	0.0288078	0.0527034	0.0237879	0.0233254	0.048341	0.037095	0.0259617	0.032458	0.0248972	0.0335712
cg19008168	ACHE	S_Shore	TSS1500;TSS1500;TSS1500;TSS1500	0.0987459	0.0593034	0.0808072	0.0616557	0.0643613	0.0787349	0.0613467	0.0395631	0.0680648	0.128131	0.123418	0.0765104	0.120193	0.0828566	0.0664543	0.0594879	0.0738501	0.0913627
cg21266314	ACHE	Island	TSS200;TSS200	0.0106782	0.0180254	0.00986748	0.0193251	0.0154555	0.0108513	0.0100462	0.0149122	0.0136452	0.016286	0.012166	0.013878	0.0135773	0.0255685	0.0133759	0.0102683	0.0140056	0.0148907
cg23276878	ACHE	Island	TSS1500;TSS1500	0.0223225	0.0196111	0.0206325	0.0243778	0.0202714	0.0189184	0.0161261	0.0205729	0.0203541	0.0223093	0.0229443	0.0219581	0.0190752	0.022181	0.0201929	0.0180113	0.0228292	0.0211877
cg27220968	ACHE	Island	TSS200;TSS200	0.0244446	0.0457788	0.0165176	0.0276751	0.0303636	0.021152	0.0311282	0.0282056	0.0281582	0.0694124	0.0187169	0.0293468	0.0448961	0.0530832	0.0281849	0.0198303	0.028324	0.0364743
	ACHE											0.0627195									0.0677564
cg02429590	ACKR2	S_Shelf	TSS1500	0.907092	0.927757	0.899142	0.920908	0.914613	0.934135	0.921389	0.914845	0.917485	0.886281	0.905772	0.893894	0.910494	0.908212	0.903093	0.933121	0.909018	0.906236
cg08973565	ACKR2	S_Shelf	TSS1500	0.651912	0.714155	0.636198	0.751089	0.66668	0.674416	0.630457	0.629212	0.669265	0.546515	0.639493	0.687237	0.575387	0.762262	0.722189	0.649718	0.679722	0.657815
cg19487414	ACKR2	S_Shelf	TSS1500	0.668209	0.66523	0.63327	0.704939	0.726151	0.709624	0.665312	0.581646	0.669298	0.696469	0.643885	0.571196	0.584148	0.678857	0.59752	0.678608	0.666199	0.63961
	ACKR2											0.752016									0.734554
cg12415575	ACKR3	S_Shore	TSS200	0.110549	0.0204144	0.122076	0.0910996	0.0772553	0.0966548	0.112269	0.0947858	0.090638	0.237783	0.11895	0.174539	0.0795297	0.0996157	0.0805069	0.101181	0.0897435	0.122731
cg19058526	ACKR3	S_Shore	TSS200	0.240596	0.236423	0.224372	0.0785697	0.112847	0.272901	0.267904	0.228034	0.207706	0.317238	0.205247	0.114851	0.0570612	0.262051	0.119356	0.22616	0.0817223	0.172961
cg20195763	ACKR3	S_Shore	TSS1500	0.248154	0.162055	0.211433	0.213468	0.208161	0.132091	0.251673	0.158913	0.198244	0.325503	0.112601	0.204697	0.0738341	0.169683	0.194351	0.101023	0.157333	0.167378
cg26358225	ACKR3	Island	TSS1500	0.260988	0.380316	0.200069	0.290259	0.206608	0.500814	0.239311	0.154346	0.279089	0.539089	0.46223	0.338607	0.386086	0.328737	0.339243	0.390755	0.287411	0.38402
	ACKR3											0.193919									0.211772
cg06892217	ACLY	Island	TSS200;TSS200	0.0168014	0.0209902	0.0195505	0.0188009	0.0178394	0.0162398	0.0147357	0.0184085	0.0179208	0.016973	0.0192176	0.0176209	0.0198759	0.0238283	0.0182392	0.0146279	0.0186462	0.0186286
cg10607754	ACLY	S_Shore	TSS1500;TSS1500;TSS1500;TSS1500	0.107525	0.0377782	0.0770474	0.0739084	0.0644949	0.0563156	0.0698009	0.0519061	0.0673471	0.0562448	0.0433394	0.0605709	0.0755554	0.0859932	0.0722109	0.0598462	0.0770814	0.0663553
cg11610739	ACLY	Island	TSS200;TSS200	0.0225183	0.0566897	0.0215102	0.028174	0.0186139	0.0204988	0.0461535	0.0199636	0.0292653	0.063789	0.019189	0.0294048	0.0610117	0.0665722	0.0214695	0.0193468	0.0198917	0.0375843
cg16637223	ACLY	Island	TSS200;TSS200	0.0424252	0.0445741	0.0348565	0.0366155	0.0472262	0.0264427	0.0390154	0.0283188	0.0374343	0.120031	0.0215208	0.0286987	0.0697031	0.0931841	0.0297177	0.0243795	0.0309367	0.0522714
cg20125290	ACLY	S_Shore	TSS1500;TSS1500;TSS1500;TSS1500	0.254678	0.201881	0.386596	0.283118	0.239659	0.154147	0.230402	0.273176	0.252957	0.205959	0.1106	0.196397	0.178682	0.212597	0.231217	0.13675	0.237369	0.188696
cg22171626	ACLY	Island	TSS200;TSS200	0.0195749	0.0219171	0.02016	0.0221696	0.0222148	0.0205257	0.0192277	0.020634	0.020803	0.0184531	0.0228257	0.0217869	0.0280594	0.023333	0.022197	0.0207324	0.0200693	0.0221821
cg24365142	ACLY	S_Shore	TSS1500;TSS1500	0.0298694	0.0251067	0.0251285	0.0295103	0.0315439	0.0226101	0.0214206	0.0278127	0.0266253	0.0147944	0.0293137	0.0256157	0.0238336	0.0392567	0.0232413	0.0201938	0.0250266	0.0251595
cg24960563	ACLY	Island	TSS200;TSS200	0.0171352	0.0191553	0.0176488	0.0177801	0.0175414	0.0150071	0.0190034	0.0179276	0.0176499	0.015435	0.0202365	0.018689	0.0217307	0.0252667	0.0214705	0.0163195	0.018344	0.0196865
cg25687894	ACLY	S_Shore	TSS1500;TSS1500	0.0987659	0.0703734	0.115276	0.0996305	0.105771	0.0653561	0.0853259	0.0831232	0.0904527	0.087167	0.0407941	0.0689888	0.0607098	0.076614	0.123748	0.0505932	0.0951457	0.0754701
	ACLY											0.0622728									0.056226
cg02499308	ACMSD		TSS1500	0.798871	0.801044	0.700652	0.831368	0.834406	0.761811	0.70842	0.838947	0.78444	0.711466	0.725268	0.746893	0.74076	0.826985	0.65102	0.771836	0.837905	0.751517
cg02812142	ACMSD		TSS1500	0.842672	0.730927	0.719698	0.643085	0.67877	0.848178	0.841333	0.696871	0.750192	0.794518	0.878313	0.804085	0.754531	0.815758	0.666652	0.768246	0.724862	0.775871
cg18766847	ACMSD		TSS1500	0.733115	0.788514	0.777485	0.779859	0.777286	0.865612	0.803345	0.691924	0.777143	0.713535	0.759852	0.701261	0.375977	0.750405	0.724018	0.855647	0.775079	0.706972
	ACMSD											0.770591									0.744786
cg00555456	ACN9	N_Shore	TSS1500	0.215367	0.296552	0.254048	0.282917	0.31937	0.162642	0.322659	0.285939	0.267437	0.100796	0.113194	0.144289	0.0698251	0.275559	0.155203	0.109875	0.199705	0.146056
cg12965421	ACN9	N_Shore	TSS1500	0.871881	0.890023	0.860371	0.896873	0.903453	0.906167	0.896667	0.874299	0.887467	0.895607	0.894812	0.86454	0.876674	0.88358	0.888347	0.873683	0.881065	0.882288
cg20642712	ACN9	N_Shore	TSS1500	0.745119	0.809453	0.782966	0.793026	0.866764	0.450577	0.793248	0.831718	0.759109	0.880714	0.493678	0.591912	0.655833	0.740878	0.49001	0.564716	0.650793	0.633567
	ACN9											0.638004									0.55397
cg13572911	ACO1	N_Shore	TSS1500	0.908209	0.91267	0.888857	0.894891	0.922228	0.932823	0.903278	0.921201	0.91052	0.923683	0.915204	0.895351	0.914304	0.883147	0.847985	0.871523	0.932915	0.898014
cg13977526	ACO1	N_Shore	TSS1500	0.048209	0.04741	0.0549438	0.0613729	0.056952	0.0511565	0.0568042	0.0645575	0.0551757	0.0359811	0.0579463	0.0520315	0.0538869	0.0609227	0.0495612	0.0280427	0.051093	0.0486832
cg14237843	ACO1	Island	TSS200	0.0120237	0.0125282	0.0135113	0.0137411	0.0138306	0.0158758	0.0112668	0.0171345	0.013739	0.0138914	0.0142707	0.0144693	0.0122634	0.0224135	0.013609	0.00862451	0.0126246	0.0140208
cg15714041	ACO1	N_Shore	TSS1500	0.0275358	0.0259631	0.0204942	0.0295669	0.0252625	0.0258222	0.0259965	0.0171949	0.0247295	0.0183731	0.0198766	0.0208216	0.0222515	0.0348138	0.0249411	0.0188846	0.0212759	0.0226548
cg16259069	ACO1	Island	TSS200	0.0724259	0.075062	0.0584788	0.0717293	0.0545787	0.0680518	0.0508712	0.0949171	0.0682644	0.0543722	0.0609966	0.0789908	0.106184	0.131643	0.0628994	0.0575615	0.0565408	0.0761485
cg19761600	ACO1	N_Shore	TSS1500;TSS1500	0.0320309	0.0335253	0.0383499	0.0396589	0.0429267	0.035844	0.0291819	0.0368946	0.0360515	0.0333208	0.0439234	0.0315338	0.0386845	0.045191	0.0281372	0.0258723	0.0286333	0.034412
	ACO1											0.184747									0.182322
cg00159442	ACO2	Island	TSS200;TSS1500	0.0339319	0.0250227	0.0263633	0.0276677	0.024415	0.0207141	0.0300158	0.0187192	0.0258562	0.0300817	0.0178788	0.0217149	0.0269431	0.0455425	0.0203117	0.0117334	0.022538	0.024593
cg03907864	ACO2	Island	TSS200;TSS1500	0.0259341	0.0204065	0.0233646	0.025212	0.0205809	0.0213672	0.0204547	0.0234344	0.0225943	0.0183647	0.0219755	0.0218292	0.0241493	0.0273283	0.0224449	0.0173318	0.0223696	0.0219742
cg04431387	ACO2	Island	TSS200;TSS1500	0.0264064	0.0317251	0.0203285	0.0280313	0.0244918	0.0190464	0.0336789	0.0188153	0.0253155	0.0255835	0.0219971	0.0215727	0.034209	0.0420362	0.0182067	0.0175407	0.0262864	0.025929
cg04467208	ACO2	Island	TSS200;TSS1500	0.0261993	0.0202845	0.0204115	0.0269716	0.0189097	0.0241078	0.0202393	0.0183848	0.0219386	0.0378528	0.0193776	0.0314825	0.0254606	0.0427963	0.0206465	0.0262993	0.0225083	0.028303
cg05365887	ACO2	Island	TSS200;TSS1500	0.0274363	0.0298342	0.0354951	0.0334023	0.0277096	0.0217763	0.0201695	0.0228696	0.0273366	0.0453157	0.0188016	0.0232406	0.0306555	0.0583799	0.0318167	0.0161981	0.0257939	0.0312752
cg05593780	ACO2	Island	TSS200;TSS1500	0.0236439	0.0196034	0.0184886	0.031772	0.0211427	0.0172538	0.0200159	0.0175274	0.021181	0.0195346	0.0185047	0.0195923	0.0325973	0.0314885	0.0189743	0.0138697	0.0202559	0.0218522
	ACO2											0.024037									0.0256544
cg02905900	ACOT11		TSS1500;TSS1500	0.21862	0.145856	0.239543	0.218016	0.19928	0.351625	0.219522	0.214681	0.225893	0.428276	0.380654	0.319065	0.314446	0.241908	0.287247	0.259768	0.283739	0.314388
cg07576219	ACOT11	S_Shelf	TSS1500;TSS1500	0.419329	0.417407	0.260974	0.401908	0.416858	0.410261	0.454687	0.364876	0.393287	0.357405	0.474268	0.38613	0.423008	0.471616	0.413239	0.540129	0.390622	0.432052
cg10266490	ACOT11		TSS200;TSS200	0.128017	0.146478	0.14707	0.188655	0.176239	0.677217	0.0829515	0.136468	0.210387	0.621988	0.538379	0.381196	0.401154	0.14214	0.458149	0.356352	0.323696	0.402882
cg10710218	ACOT11		TSS1500;TSS1500	0.584517	0.61155	0.516396	0.610166	0.634738	0.730268	0.575962	0.633245	0.612105	0.751772	0.781768	0.668433	0.657263	0.676409	0.705323	0.672914	0.679336	0.699152
cg11715991	ACOT11		TSS1500;TSS1500	0.681743	0.710669	0.567164	0.704634	0.700848	0.755315	0.773637	0.695667	0.69871	0.76143	0.798509	0.729343	0.747819	0.767428	0.77403	0.728901	0.716809	0.753034
cg12854143	ACOT11		TSS200;TSS200	0.247022	0.250676	0.300668	0.30719	0.285874	0.618458	0.252327	0.239386	0.3127	0.589125	0.540103	0.429898	0.471405	0.30889	0.50663	0.453205	0.394657	0.461739
cg21527621	ACOT11		TSS1500;TSS1500	0.17238	0.118408	0.217961	0.227184	0.243603	0.589626	0.259724	0.123304	0.244024	0.725144	0.540039	0.42938	0.456455	0.319987	0.374459	0.513718	0.294562	0.456718
cg26753037	ACOT11		TSS200;TSS200	0.324185	0.259957	0.328713	0.31002	0.294175	0.500668	0.285071	0.296895	0.32496	0.493961	0.476525	0.42555	0.435217	0.330678	0.481015	0.451617	0.368704	0.432908
	ACOT11											0.377758									0.494109
cg09247949	ACOT13	Island	TSS200;TSS200;TSS200	0.0108111	0.0189958	0.0148552	0.0148103	0.0144216	0.0118739	0.0105921	0.0136458	0.0137507	0.0132805	0.0142357	0.0150346	0.018772	0.020883	0.014275	0.0080363	0.0157692	0.0150358
cg11076890	ACOT13	Island	TSS1500;TSS1500;1stExon	0.0120599	0.0184598	0.0111338	0.013574	0.0131058	0.0125851	0.0112045	0.0141026	0.0132782	0.0151399	0.0113539	0.01187	0.0172772	0.0218474	0.0127407	0.00826963	0.0135816	0.01401
cg13431929	ACOT13	N_Shore	TSS1500;TSS1500;Body	0.198502	0.212458	0.381695	0.288568	0.319272	0.121067	0.223689	0.246243	0.248937	0.174167	0.112873	0.165674	0.115576	0.183706	0.192199	0.14127	0.213816	0.16241
cg20170233	ACOT13	Island	TSS1500;TSS1500;1stExon	0.0128161	0.0219924	0.0137227	0.0141084	0.0120208	0.0139146	0.0125066	0.0110718	0.0140192	0.0658028	0.0127318	0.0285449	0.0493897	0.0274895	0.0141507	0.00969235	0.0122295	0.0275039
cg23020402	ACOT13	Island	TSS1500;Body;TSS1500	0.0251085	0.0323261	0.0265932	0.0308152	0.033623	0.0304764	0.0278633	0.0275362	0.0292927	0.0487772	0.025517	0.0237666	0.0458757	0.0470184	0.0279192	0.0222067	0.0266802	0.0334701
cg24759333	ACOT13	Island	TSS200;TSS200;TSS200	0.0170689	0.0175277	0.0158192	0.0173202	0.0167807	0.0157066	0.0149567	0.0159236	0.016388	0.0134966	0.0172909	0.0167841	0.0199554	0.0198404	0.0168299	0.0125145	0.0156188	0.0165413
cg24966682	ACOT13	Island	TSS1500;Body;TSS1500	0.0621803	0.0374783	0.043661	0.051713	0.0504494	0.0475406	0.0537756	0.0354913	0.0477862	0.115625	0.0355333	0.0473634	0.0761741	0.0816923	0.0498978	0.0456948	0.0201307	0.0590139
cg26842743	ACOT13	Island	TSS200;TSS200;1stExon;5'UTR	0.0202564	0.0192092	0.0180513	0.0202884	0.0194846	0.0178835	0.0153718	0.0190584	0.0187005	0.0171773	0.0245833	0.021667	0.0237849	0.0248495	0.0211381	0.0173384	0.0186226	0.0211451
	ACOT13											0.050269									0.0436413
cg01498900	ACOT2	N_Shore	TSS200	0.0969054	0.0548599	0.0997309	0.0753625	0.0575651	0.121297	0.0837582	0.0597304	0.0811512	0.345364	0.11721	0.131222	0.123754	0.105309	0.204019	0.16746	0.0670573	0.157674
cg07179457	ACOT2	N_Shore	TSS1500	0.882552	0.797011	0.776013	0.857519	0.857911	0.211419	0.870274	0.743707	0.749551	0.770103	0.737505	0.677229	0.794874	0.834866	0.188341	0.725584	0.632078	0.670073
cg20067142	ACOT2	N_Shore	TSS1500	0.776575	0.776408	0.77144	0.801229	0.7864	0.792483	0.789292	0.763169	0.782124	0.707149	0.798225	0.757676	0.791968	0.748543	0.778376	0.784163	0.761716	0.765977
cg25598083	ACOT2	N_Shore	TSS1500	0.286628	0.228346	0.442691	0.322384	0.389688	0.292626	0.291112	0.36422	0.327212	0.483804	0.372446	0.370849	0.241708	0.268474	0.224798	0.320625	0.279799	0.320313
	ACOT2											0.48501									0.478509
cg00569951	ACOT4	N_Shore	TSS1500	0.723851	0.761999	0.727645	0.775709	0.748691	0.774688	0.725194	0.738839	0.747077	0.826294	0.738901	0.710118	0.739731	0.789653	0.731888	0.689204	0.691021	0.739601
cg00620857	ACOT4	N_Shore	TSS1500	0.854921	0.912783	0.91227	0.892502	0.9101	0.925666	0.913552	0.915964	0.90472	0.891134	0.896029	0.87133	0.895501	0.892853	0.900099	0.894116	0.903466	0.893066
cg01691255	ACOT4	N_Shore	TSS1500	0.941857	0.930243	0.897417	0.923313	0.908748	0.948479	0.943261	0.892116	0.923179	0.827985	0.85709	0.836085	0.851066	0.916775	0.868745	0.953589	0.901707	0.87663
cg07023532	ACOT4	N_Shore	TSS1500	0.984387	0.983369	0.983468	0.983793	0.984708	0.986405	0.983686	0.985415	0.984404	0.978676	0.984238	0.981258	0.981737	0.981731	0.983249	0.988504	0.984142	0.982942
cg18977434	ACOT4	N_Shore	TSS1500	0.927797	0.950333	0.930207	0.931283	0.924186	0.939387	0.942526	0.943996	0.936214	0.920341	0.948542	0.931749	0.928866	0.939466	0.947289	0.959855	0.944959	0.940133
cg21233517	ACOT4	Island	TSS200	0.0649646	0.123173	0.0723004	0.094551	0.0888275	0.0619757	0.0693303	0.0508799	0.0782503	0.191282	0.211073	0.0598464	0.0792749	0.146185	0.109942	0.153278	0.052348	0.125404
cg21877774	ACOT4	N_Shore	TSS200	0.056091	0.163968	0.0794613	0.0909508	0.0972027	0.081736	0.0932421	0.0639965	0.0908311	0.252178	0.288259	0.074044	0.195371	0.154029	0.120997	0.177461	0.0645107	0.165856
	ACOT4											0.666382									0.674805
cg00836542	ACOT6	S_Shelf	TSS200	0.69289	0.762752	0.751537	0.810977	0.740084	0.761706	0.666028	0.755809	0.742723	0.478142	0.732458	0.649356	0.586612	0.756371	0.751653	0.743207	0.756203	0.68175
cg09274104	ACOT6	S_Shelf	TSS1500	0.782821	0.634963	0.684623	0.789357	0.708425	0.726844	0.810858	0.592495	0.716298	0.647449	0.584672	0.695915	0.80905	0.786895	0.765262	0.786559	0.657544	0.716668
cg18828681	ACOT6	S_Shelf	TSS200	0.419447	0.413053	0.0835325	0.131533	0.534178	0.127885	0.473974	0.380416	0.320502	0.260653	0.378161	0.0720338	0.134526	0.349053	0.0764877	0.545796	0.382733	0.27493
cg20578581	ACOT6	S_Shelf	TSS200	0.887711	0.898999	0.886604	0.887742	0.903524	0.902893	0.901582	0.90878	0.897229	0.854539	0.895061	0.89525	0.844438	0.907573	0.833194	0.91187	0.905103	0.880879
	ACOT6											0.669188									0.638557
cg00507532	ACOT7	Island	TSS200	0.0202347	0.0169132	0.0224461	0.0226589	0.0196066	0.0202473	0.0183097	0.0196218	0.0200048	0.0182595	0.0187237	0.0202414	0.0198405	0.0217401	0.0234673	0.0180843	0.0222456	0.0203253
cg08889373	ACOT7	Island	TSS1500	0.0323897	0.0192817	0.0230821	0.0241734	0.0206272	0.0200658	0.0181358	0.0204548	0.0222763	0.0187475	0.0236848	0.0237868	0.0284046	0.0281492	0.0245506	0.0176313	0.0219268	0.0233602
cg09273516	ACOT7	S_Shore	TSS1500	0.0399944	0.0483862	0.0360049	0.0616514	0.0566695	0.038226	0.0613072	0.0452803	0.04844	0.034508	0.0358672	0.0461635	0.0502516	0.0603975	0.0320093	0.040664	0.0350848	0.0418682
cg10967178	ACOT7	S_Shore	TSS1500	0.0416244	0.0527381	0.040035	0.0573637	0.0701947	0.0265029	0.0472835	0.0473073	0.0478812	0.050255	0.0357971	0.0333455	0.0346863	0.076227	0.0506007	0.0364521	0.0471598	0.0455654
cg15439119	ACOT7	S_Shore	TSS1500	0.870747	0.898676	0.887064	0.89768	0.887769	0.904213	0.885832	0.885808	0.889724	0.901288	0.892937	0.872616	0.893395	0.896787	0.886834	0.906722	0.887903	0.89231
cg17236617	ACOT7	S_Shore	TSS1500	0.0391031	0.0380092	0.03566	0.0303677	0.0406541	0.0363039	0.0238363	0.0235183	0.0334316	0.0516496	0.0213449	0.029499	0.0467642	0.0531709	0.0353431	0.0268522	0.0256288	0.0362816
cg17429065	ACOT7	Island	TSS200	0.160347	0.114078	0.0844967	0.124378	0.114229	0.0918594	0.105069	0.0592113	0.106709	0.108926	0.0848274	0.0763802	0.213841	0.251292	0.164151	0.130771	0.0829275	0.13914
cg25165880	ACOT7	S_Shore	TSS1500	0.309383	0.370942	0.328039	0.361189	0.43183	0.197048	0.274043	0.255122	0.315949	0.208011	0.18165	0.211144	0.170843	0.249512	0.207177	0.218977	0.272212	0.214941
cg25370592	ACOT7	Island	TSS1500	0.0124089	0.0156597	0.0158835	0.018223	0.014014	0.0142792	0.0112821	0.0152869	0.0146297	0.0158377	0.0130631	0.0143985	0.0140834	0.0201637	0.0127882	0.0116339	0.0124225	0.0142989
cg26896160	ACOT7	Island	TSS200	0.0773532	0.064953	0.0375814	0.039924	0.0402362	0.0545442	0.0660891	0.0275815	0.0510328	0.164024	0.0323123	0.0393268	0.13959	0.103587	0.0489443	0.0537854	0.0323728	0.0767428
cg27029120	ACOT7	S_Shore	TSS1500	0.776135	0.766041	0.634699	0.700778	0.75607	0.637372	0.688544	0.690304	0.706243	0.750391	0.708461	0.714799	0.625852	0.792532	0.606551	0.692496	0.668273	0.694919
cg27316808	ACOT7	Island	TSS200	0.0892809	0.0943332	0.057429	0.0651287	0.0609003	0.0665847	0.0803075	0.0398666	0.0692289	0.165329	0.0425647	0.0574913	0.139064	0.144572	0.0617213	0.0664773	0.0400846	0.089663
cg27382217	ACOT7	S_Shore	TSS1500	0.653439	0.700086	0.595676	0.661158	0.690903	0.654397	0.662902	0.665054	0.660452	0.641186	0.676226	0.637872	0.694127	0.674444	0.633983	0.645325	0.696253	0.662427
	ACOT7											0.229692									0.227065
cg04235544	ACOT9	S_Shore	TSS1500;TSS1500	0.637501	0.706337	0.58835	0.672018	0.638707	0.62675	0.628735	0.559122	0.63219	0.512899	0.575948	0.561374	0.678874	0.644183	0.740391	0.776371	0.596327	0.635796
cg04292836	ACOT9	Island	TSS200;TSS200	0.0309921	0.0263465	0.0243385	0.0281373	0.0277169	0.0229428	0.0301047	0.027135	0.0272142	0.0229591	0.12216	0.0259513	0.0307243	0.0469708	0.0298245	0.0246077	0.0247199	0.0409897
cg08289016	ACOT9	S_Shore	TSS1500;TSS1500	0.0604082	0.0372336	0.0526545	0.0625103	0.0678111	0.0663888	0.0540711	0.039863	0.0551176	0.0769058	0.0437423	0.0556814	0.0424803	0.0743379	0.0328525	0.0374715	0.0404673	0.0504924
cg12543132	ACOT9	S_Shore	TSS1500;TSS1500	0.0366801	0.0549503	0.0581598	0.0768708	0.0828428	0.0542951	0.0716973	0.0555507	0.0613809	0.0397221	0.0434229	0.0530633	0.0461738	0.0610585	0.056671	0.0299813	0.0619407	0.0490042
cg14196261	ACOT9	Island	TSS200;TSS200	0.0577077	0.0680635	0.0506236	0.0666658	0.0619711	0.0555202	0.0490762	0.0459281	0.0569445	0.0563572	0.112244	0.0488953	0.0660985	0.0977146	0.0662971	0.0390406	0.0505638	0.0671514
cg16680922	ACOT9	Island	TSS200;TSS200	0.0106436	0.0139973	0.0107243	0.0120756	0.0109762	0.0109065	0.00965093	0.0107686	0.0112179	0.0212732	0.060429	0.011622	0.0113867	0.0346953	0.00998886	0.00790477	0.00997014	0.0209087
cg17396400	ACOT9	Island	TSS200;TSS200	0.0464831	0.0342982	0.0303615	0.0330537	0.0325081	0.0374195	0.0265455	0.027584	0.0335317	0.0393975	0.0369125	0.030212	0.0430889	0.0542057	0.0363804	0.0229884	0.033285	0.0370588
cg23921120	ACOT9	S_Shore	TSS1500;TSS1500	0.880241	0.922594	0.887576	0.885876	0.905703	0.894817	0.825901	0.891138	0.886731	0.858615	0.885929	0.824424	0.903411	0.90037	0.888181	0.904147	0.894918	0.882499
cg24123780	ACOT9	S_Shore	TSS1500;TSS1500	0.0808352	0.0667959	0.0776935	0.0646119	0.0670618	0.0412869	0.0611014	0.0378665	0.0621566	0.0845616	0.0631785	0.0674766	0.0942449	0.0734188	0.0542772	0.0633139	0.0461444	0.068327
cg24547622	ACOT9	S_Shore	TSS1500;TSS1500	0.0115801	0.017125	0.0114553	0.0156452	0.0141434	0.0118109	0.0123285	0.0131134	0.0134002	0.0105498	0.015228	0.0140047	0.0190628	0.020946	0.0141274	0.0082668	0.0146746	0.0146075
cg26207017	ACOT9	Island	TSS200;TSS200	0.0529001	0.053633	0.0264765	0.0349799	0.0382838	0.0338994	0.0345123	0.0285248	0.0379012	0.118562	0.0716733	0.0315783	0.0943131	0.0747349	0.0336585	0.0340482	0.0375821	0.0620188
	ACOT9											0.170708									0.17535
cg10931252	ACOX1	S_Shore	TSS1500;TSS1500;5'UTR	0.0854978	0.0600182	0.0792239	0.0702946	0.084736	0.11501	0.0900352	0.0699733	0.0818486	0.178808	0.110919	0.0925801	0.0872925	0.0795446	0.090602	0.091852	0.0727194	0.10054
cg11507926	ACOX1	Island	TSS1500;TSS1500;5'UTR	0.0292376	0.0382154	0.0328762	0.0506195	0.0425739	0.0388909	0.0336942	0.0354002	0.0376885	0.0816429	0.0257247	0.052349	0.0607007	0.0620675	0.0324284	0.0343474	0.0417227	0.0488729
cg14770570	ACOX1	S_Shore	TSS1500;TSS1500;5'UTR	0.162671	0.129548	0.138761	0.158843	0.12756	0.116564	0.092905	0.107311	0.12927	0.0352658	0.0790377	0.102662	0.0958387	0.170402	0.102611	0.0886489	0.111281	0.0982184
cg16419345	ACOX1	S_Shore	TSS1500;TSS1500;5'UTR	0.0783585	0.0373186	0.0283248	0.0475708	0.0407445	0.0307841	0.0359635	0.0315006	0.0413207	0.172809	0.0233794	0.0344614	0.0420805	0.054094	0.0271555	0.0249079	0.0306829	0.0511963
cg24357503	ACOX1	Island	TSS200;1stExon;TSS200;5'UTR	0.0389635	0.0286713	0.0328735	0.0377049	0.0388333	0.0243489	0.0424119	0.0261163	0.0337404	0.0562649	0.0298179	0.0285075	0.0441097	0.0561751	0.0343694	0.0271355	0.0239858	0.0375457
	ACOX1											0.0647737									0.0672746
cg02259384	ACOX2		TSS1500	0.517702	0.457282	0.592861	0.596063	0.471719	0.828239	0.582781	0.532763	0.572426	0.793691	0.735942	0.667543	0.793464	0.517943	0.76818	0.696	0.567774	0.692567
cg05193970	ACOX2		TSS1500	0.380697	0.573114	0.468034	0.521371	0.397741	0.742944	0.516429	0.41876	0.502386	0.782323	0.563199	0.503229	0.485838	0.413501	0.580668	0.399766	0.524624	0.531644
cg13705284	ACOX2		TSS1500	0.273631	0.212148	0.371409	0.322441	0.252027	0.657033	0.313401	0.22051	0.327825	0.750763	0.462555	0.414203	0.481664	0.251999	0.498911	0.342479	0.315144	0.439715
cg13979085	ACOX2		TSS1500	0.515804	0.63481	0.561933	0.608398	0.533529	0.820875	0.639577	0.575568	0.611312	0.75638	0.613973	0.62335	0.488529	0.584466	0.64125	0.483472	0.592764	0.598023
cg16587010	ACOX2		TSS1500	0.185543	0.19286	0.232329	0.235522	0.17327	0.556782	0.238894	0.172888	0.248511	0.573634	0.40073	0.402465	0.478209	0.232847	0.394508	0.354621	0.268341	0.388169
	ACOX2											0.452492									0.530024
cg00043076	ACOX3	S_Shore	TSS1500;TSS1500	0.515755	0.509286	0.73735	0.669397	0.735842	0.437586	0.69713	0.602608	0.613119	0.484612	0.368269	0.401097	0.256258	0.55576	0.502628	0.557217	0.68001	0.475731
cg01822242	ACOX3	Island	TSS1500;TSS1500	0.0155922	0.0174769	0.0168101	0.01698	0.0222521	0.0144392	0.0132908	0.0145002	0.0164177	0.0157194	0.0156764	0.0200063	0.0180837	0.023082	0.016862	0.0158258	0.015916	0.0176465
cg02189117	ACOX3	S_Shore	TSS1500;TSS1500	0.495159	0.368782	0.454165	0.495167	0.488868	0.279149	0.519627	0.384809	0.435716	0.296348	0.318596	0.377066	0.319836	0.487777	0.414381	0.268398	0.321839	0.35053
cg06768993	ACOX3	S_Shore	TSS1500;TSS1500	0.612423	0.500511	0.633608	0.588375	0.636429	0.373294	0.635187	0.524264	0.563011	0.444477	0.42794	0.452043	0.357567	0.639154	0.387752	0.451864	0.541406	0.462775
cg06862062	ACOX3	Island	TSS200;TSS200	0.02714	0.0275589	0.0224873	0.0300177	0.0207755	0.0280507	0.0209632	0.0189354	0.0244911	0.0538104	0.0177055	0.0214031	0.0458806	0.0383238	0.0188501	0.0141577	0.0213188	0.0289312
cg11236850	ACOX3	Island	TSS1500;TSS1500	0.0432509	0.0355343	0.0414342	0.0528377	0.0402378	0.0312464	0.0297925	0.028432	0.0378457	0.0455255	0.0300683	0.0367749	0.0454895	0.0647675	0.0460112	0.0195721	0.0358762	0.0405106
cg13057196	ACOX3	Island	TSS200;TSS200	0.0118575	0.0156473	0.014418	0.0161755	0.0152912	0.0132599	0.00920437	0.0140811	0.0137419	0.0119701	0.0139901	0.0144508	0.0210969	0.0220175	0.0132342	0.0113711	0.0128603	0.0151239
cg14436769	ACOX3	Island	TSS200;TSS200	0.0381849	0.0475295	0.0309365	0.0324553	0.043461	0.04069	0.0475333	0.0259825	0.0383466	0.0703812	0.0260906	0.0425987	0.130747	0.0629979	0.0369765	0.028786	0.0329311	0.0539386
cg16265557	ACOX3	Island	TSS1500;TSS1500	0.0276353	0.0346396	0.0310825	0.0418458	0.0278324	0.0303721	0.0189873	0.0215728	0.029246	0.033591	0.0240835	0.0241135	0.0415025	0.037977	0.0263571	0.0176008	0.0201605	0.0281732
cg18002905	ACOX3	Island	TSS200;TSS200	0.0568722	0.0339309	0.0337359	0.039294	0.0406391	0.0347932	0.0378173	0.0266765	0.0379699	0.0788515	0.0249773	0.0407215	0.0770221	0.0568173	0.0391249	0.0406964	0.0316307	0.0487302
cg19387228	ACOX3	Island	TSS200;TSS200	0.0664602	0.060798	0.0554127	0.0608539	0.0568633	0.0651758	0.0563132	0.0453599	0.0584046	0.0889567	0.0464014	0.0472998	0.120486	0.0827566	0.0742178	0.0542122	0.0495117	0.0704803
cg19542630	ACOX3	Island	TSS1500;TSS1500	0.0188028	0.0176147	0.0189717	0.0205763	0.0178083	0.0177072	0.0157823	0.0182583	0.0181902	0.0161869	0.0200827	0.0211949	0.0194047	0.0263388	0.0191624	0.0150057	0.0200382	0.0196768
	ACOX3											0.157208									0.134354
cg02424835	ACOXL	N_Shore	TSS1500;TSS1500;TSS1500	0.877063	0.899994	0.872888	0.894015	0.905018	0.92568	0.913903	0.905692	0.899282	0.897164	0.90512	0.884261	0.919309	0.896594	0.900788	0.911487	0.908686	0.902926
cg05739167	ACOXL	N_Shore	TSS1500;TSS1500;TSS1500	0.499697	0.700483	0.636082	0.677692	0.691672	0.676117	0.611647	0.673852	0.645905	0.336438	0.436325	0.50041	0.419579	0.523582	0.397811	0.409848	0.500121	0.440514
cg07873900	ACOXL	N_Shore	TSS1500	0.73983	0.858183	0.841281	0.878	0.79204	0.882182	0.818961	0.821931	0.829051	0.646813	0.852054	0.788541	0.815831	0.785837	0.753522	0.855015	0.81873	0.789543
cg10768548	ACOXL	N_Shore	TSS1500;TSS1500;TSS1500	0.195689	0.325221	0.252157	0.247333	0.245044	0.155132	0.192047	0.219878	0.229063	0.185156	0.111708	0.118411	0.179685	0.240904	0.17578	0.120903	0.205962	0.167314
cg15833294	ACOXL	N_Shore	TSS1500;TSS1500;TSS1500	0.262434	0.310562	0.273541	0.321777	0.340094	0.307028	0.284227	0.317934	0.3022	0.256603	0.191182	0.220998	0.242003	0.245704	0.193016	0.196281	0.221755	0.220943
cg20246567	ACOXL	N_Shore	TSS1500	0.788044	0.880491	0.712573	0.792464	0.832496	0.868301	0.838251	0.784172	0.812099	0.841777	0.86585	0.833232	0.892722	0.842928	0.846707	0.835119	0.848735	0.850884
cg21414754	ACOXL	N_Shore	TSS1500	0.65601	0.845972	0.750817	0.812436	0.777506	0.813409	0.755923	0.830717	0.780349	0.68188	0.786632	0.725285	0.738498	0.662009	0.622167	0.724216	0.769981	0.713834
	ACOXL											0.642564									0.583708
cg00108164	ACP1	Island	TSS1500;TSS200;TSS200;TSS1500;TSS1500;TSS1500	0.0240855	0.0218652	0.0271581	0.0252779	0.0209047	0.0189444	0.0237227	0.0225664	0.0230656	0.0198767	0.101533	0.020958	0.206874	0.0251217	0.0228123	0.0156111	0.0204503	0.0541546
cg00114724	ACP1	Island	TSS1500;TSS1500;TSS1500;TSS1500;TSS1500;TSS1500;Body;Body;Body;5'UTR	0.00944295	0.0129732	0.0125883	0.0131346	0.011009	0.0104346	0.00994994	0.011034	0.0113208	0.0107559	0.0124378	0.0105774	0.0146791	0.0185155	0.0111685	0.00935163	0.0122284	0.0124643
cg03468349	ACP1	Island	TSS1500;TSS200;TSS200;TSS1500;TSS1500;TSS1500	0.0232412	0.0210678	0.0224352	0.0244496	0.0213713	0.0190301	0.0190494	0.0183568	0.0211252	0.0250844	0.259579	0.0231923	0.160427	0.0306108	0.0259448	0.0152	0.0235703	0.0704511
cg13354988	ACP1	Island	TSS1500;TSS1500;Body;TSS1500;Body;TSS1500	0.0710156	0.0500908	0.0878751	0.109358	0.0862771	0.0514948	0.0589342	0.0763602	0.0739257	0.0550173	0.158554	0.0555049	0.108924	0.0780925	0.0560682	0.0466356	0.0631388	0.0777419
cg20749741	ACP1	Island	TSS1500;TSS200;TSS200;TSS1500;TSS1500;TSS1500	0.0206678	0.0207297	0.025856	0.0234671	0.0205546	0.0200586	0.0196031	0.0229702	0.0217384	0.0202913	0.381008	0.0210853	0.22314	0.0293948	0.0214377	0.0189367	0.022535	0.0922286
cg21825027	ACP1	Island	TSS1500;TSS200;TSS200;TSS1500;TSS1500;TSS1500	0.0127318	0.0154023	0.0148317	0.0167647	0.0132743	0.0132105	0.013182	0.0155169	0.0143643	0.0160696	0.136927	0.0147943	0.0538844	0.0229563	0.015184	0.00948839	0.0151721	0.0355595
cg25945732	ACP1	Island	TSS1500;TSS200;TSS200;TSS1500;TSS1500;TSS1500	0.0191068	0.0207704	0.018086	0.0166016	0.017933	0.017094	0.0232705	0.020115	0.0191222	0.0141516	0.0806835	0.0186526	0.174316	0.0212827	0.0175296	0.0145932	0.0175812	0.0448488
cg26398848	ACP1	Island	TSS1500;TSS1500;Body;TSS1500;Body;TSS1500	0.258457	0.247855	0.326604	0.279454	0.241447	0.190361	0.279917	0.262873	0.260871	0.311731	0.317275	0.203174	0.306078	0.238985	0.186036	0.17693	0.221273	0.245185
	ACP1											0.0556916									0.0790793
cg02515596	ACP2	S_Shore	TSS1500;5'UTR;TSS1500;TSS1500;TSS1500;TSS1500;Body;Body	0.024941	0.0265828	0.0331348	0.029057	0.0257212	0.0257237	0.025619	0.0209358	0.0264644	0.0252289	0.0247119	0.0269858	0.0322862	0.0432179	0.0258172	0.021513	0.0307975	0.0288198
	ACP2											0.0264644									0.0288198
cg00481884	ACP5	S_Shore	TSS1500;TSS1500;TSS200;TSS200	0.352463	0.327563	0.296387	0.392374	0.456705	0.588852	0.390504	0.395864	0.400089	0.424163	0.507098	0.42707	0.501468	0.411891	0.48873	0.508274	0.346831	0.451941
cg00723928	ACP5	S_Shore	TSS1500;TSS1500	0.670392	0.702272	0.708955	0.771652	0.647623	0.772923	0.725473	0.721367	0.715082	0.705035	0.735881	0.688304	0.686123	0.683928	0.745276	0.632388	0.726793	0.700466
cg01602621	ACP5	S_Shore	TSS1500;TSS1500;TSS200;TSS200	0.273142	0.476055	0.18553	0.44666	0.516777	0.766137	0.274636	0.347864	0.41085	0.557415	0.565703	0.500126	0.615604	0.449569	0.653847	0.688993	0.417925	0.556148
cg01732617	ACP5	S_Shore	TSS1500;TSS1500	0.655062	0.632887	0.518666	0.644271	0.524282	0.693287	0.711453	0.598284	0.622274	0.757537	0.807242	0.728618	0.784131	0.554573	0.69556	0.535165	0.617319	0.685018
cg02874942	ACP5	Island	TSS1500;5'UTR;TSS200;5'UTR	0.0389315	0.140383	0.0345568	0.11949	0.143156	0.512538	0.0624024	0.0699063	0.140171	0.122444	0.249329	0.193434	0.140776	0.0793664	0.338115	0.346989	0.106438	0.197111
cg03302259	ACP5	S_Shore	TSS1500;TSS1500;TSS200;TSS200	0.555352	0.60503	0.462933	0.55391	0.604521	0.728419	0.57569	0.531007	0.577108	0.567189	0.686247	0.655792	0.628485	0.565418	0.714227	0.70698	0.605237	0.641197
cg03719155	ACP5	S_Shore	TSS1500;TSS1500;TSS200;TSS200	0.497134	0.514066	0.352661	0.479025	0.547413	0.656703	0.52817	0.454278	0.503681	0.594112	0.624024	0.520835	0.561563	0.507204	0.604574	0.691226	0.467169	0.571338
cg16338783	ACP5	S_Shore	TSS1500;TSS1500	0.755953	0.810592	0.650675	0.799813	0.659752	0.849619	0.804281	0.767661	0.762293	0.778573	0.814975	0.780301	0.870149	0.792425	0.804249	0.83499	0.800362	0.809503
cg17658002	ACP5	S_Shore	TSS1500;TSS1500;TSS200;TSS200	0.749466	0.792199	0.572896	0.673025	0.715691	0.808527	0.754026	0.725613	0.72393	0.74611	0.8289	0.761353	0.786149	0.744013	0.773562	0.814127	0.81694	0.783894
	ACP5											0.539498									0.599624
cg00543196	ACP6	Island	TSS200	0.00856095	0.0113445	0.0085802	0.00961382	0.0110197	0.00915025	0.00843646	0.0100804	0.00959828	0.0105772	0.0100236	0.0101614	0.011267	0.0140493	0.0100476	0.00677796	0.00985658	0.0103451
cg01834614	ACP6	S_Shore	TSS1500	0.243778	0.230277	0.184553	0.22338	0.212401	0.149104	0.259158	0.185979	0.211079	0.234911	0.16839	0.187966	0.138699	0.315443	0.190685	0.201357	0.1879	0.203169
cg03401580	ACP6	Island	TSS200	0.014464	0.0128333	0.0123845	0.0157942	0.0136029	0.0117198	0.0123381	0.0133671	0.013313	0.0127514	0.012526	0.0119146	0.0115677	0.0158088	0.011965	0.0135247	0.0130624	0.0128901
cg05755010	ACP6	Island	TSS1500	0.0123767	0.015643	0.0132049	0.0144996	0.0144024	0.0152026	0.0111761	0.0174736	0.0142474	0.0136759	0.0158965	0.0140392	0.0152071	0.0214311	0.0154309	0.0104109	0.0159554	0.0152559
cg09264377	ACP6	S_Shore	TSS1500	0.838354	0.870173	0.821277	0.869352	0.842636	0.878312	0.877871	0.830302	0.853535	0.937426	0.853338	0.806771	0.8566	0.885158	0.838134	0.874729	0.886729	0.867361
cg12614442	ACP6	Island	TSS200	0.0145871	0.0142013	0.0148083	0.0161481	0.0152423	0.0133026	0.0130473	0.0158768	0.0146517	0.015132	0.0173776	0.0172829	0.0136817	0.0192126	0.0137486	0.0115006	0.0160123	0.0154935
cg13688186	ACP6	S_Shore	TSS1500	0.667455	0.893906	0.898663	0.886268	0.897645	0.910514	0.895157	0.655715	0.838165	0.90407	0.878904	0.600517	0.62387	0.905606	0.894141	0.903048	0.899848	0.82625
cg15636040	ACP6	Island	TSS200	0.0200437	0.020875	0.0182678	0.0220421	0.0363158	0.0174884	0.0238889	0.0186614	0.0221979	0.0459759	0.0158822	0.0220376	0.0314254	0.0238565	0.0175761	0.0207086	0.0178364	0.0244123
cg16790610	ACP6	Island	TSS1500	0.0190463	0.0218277	0.0235558	0.0293123	0.0239396	0.0171209	0.0233823	0.02335	0.0226919	0.0224326	0.0212271	0.0218198	0.0262981	0.0340047	0.0212948	0.0189113	0.0232553	0.0236555
cg19693476	ACP6	Island	TSS200	0.022324	0.0213509	0.0140218	0.0155417	0.0152519	0.00821474	0.0104093	0.0129807	0.0150119	0.019844	0.0142782	0.0127537	0.0137646	0.0420683	0.012145	0.00971997	0.0121562	0.0170912
	ACP6											0.201449									0.201592
cg03774468	ACPL2	Island	TSS1500;TSS1500	0.0492678	0.050192	0.0257359	0.0656438	0.0935682	0.474693	0.0482104	0.0510235	0.107292	0.352368	0.383522	0.334352	0.366907	0.15769	0.38396	0.414212	0.0729855	0.30825
cg19941450	ACPL2	Island	TSS200;TSS200	0.01758	0.0191541	0.0185402	0.0171498	0.0220757	0.0254785	0.00640539	0.0162529	0.0178296	0.0132362	0.0139896	0.0158753	0.026603	0.0254455	0.0164513	0.0122167	0.0170405	0.0176073
cg22251124	ACPL2	Island	TSS200;TSS200	0.0212076	0.0250625	0.0197084	0.0243697	0.035972	0.0297387	0.0259002	0.0197286	0.025211	0.0171275	0.0231481	0.0184099	0.0276724	0.0369567	0.0155043	0.0225353	0.0189047	0.0225324
cg24295125	ACPL2	Island	TSS1500;TSS1500	0.0509221	0.0371705	0.0113166	0.0183937	0.0384204	0.227525	0.0294049	0.0171997	0.0537941	0.389649	0.230519	0.202972	0.323454	0.101271	0.156692	0.261516	0.0239901	0.211258
	ACPL2											0.0510316									0.139912
cg06539962	ACPP		TSS1500;TSS1500;TSS1500	0.85784	0.852192	0.778837	0.733827	0.76906	0.855819	0.816027	0.804655	0.808532	0.896178	0.815558	0.885675	0.870903	0.754717	0.87924	0.800064	0.830979	0.841664
cg15958424	ACPP		TSS200;TSS200	0.371517	0.321196	0.344562	0.35546	0.301738	0.218113	0.474138	0.317436	0.33802	0.168562	0.211361	0.281049	0.162724	0.41813	0.279489	0.193198	0.33038	0.255612
cg17342367	ACPP		TSS200;TSS200;TSS200	0.144349	0.0923874	0.141439	0.14188	0.108459	0.0638456	0.178609	0.101647	0.121577	0.0803193	0.0666018	0.115749	0.0713813	0.188062	0.134518	0.076415	0.115167	0.106027
cg19541865	ACPP		TSS1500;TSS1500	0.735749	0.546544	0.753966	0.653562	0.638378	0.395875	0.733362	0.643983	0.637677	0.326002	0.431471	0.588599	0.403008	0.759229	0.437009	0.509055	0.688866	0.517905
	ACPP											0.476452									0.430302
cg04864083	ACPT	N_Shore	TSS200	0.812147	0.920747	0.816063	0.877249	0.896738	0.918735	0.85934	0.870354	0.871422	0.89058	0.894424	0.84592	0.797931	0.849957	0.83529	0.912885	0.861627	0.861077
cg06211733	ACPT	N_Shelf	TSS1500	0.661484	0.696068	0.623603	0.665776	0.699407	0.739367	0.63445	0.673613	0.674221	0.751449	0.788474	0.639526	0.629731	0.706036	0.550326	0.691843	0.694516	0.681488
cg06590444	ACPT	N_Shore	TSS1500	0.917727	0.91958	0.90398	0.91978	0.910581	0.542446	0.941549	0.936373	0.874002	0.894694	0.459899	0.934751	0.917659	0.51011	0.881413	0.51189	0.486687	0.699638
cg06619706	ACPT	N_Shore	TSS200	0.80244	0.916513	0.751112	0.80922	0.884845	0.953091	0.832378	0.78309	0.841586	0.916991	0.841686	0.791182	0.733224	0.807213	0.866221	0.905512	0.759177	0.827651
cg11464216	ACPT	N_Shore	TSS200	0.940428	0.941764	0.894147	0.914071	0.947135	0.95543	0.936173	0.915943	0.930636	0.942923	0.93383	0.905271	0.896566	0.917629	0.925638	0.958068	0.908245	0.923521
cg14582544	ACPT	N_Shore	TSS200	0.62427	0.813646	0.662069	0.778006	0.728871	0.837256	0.691761	0.713169	0.731131	0.883457	0.814149	0.662967	0.637669	0.749987	0.65977	0.76232	0.697587	0.733488
cg15782391	ACPT	N_Shore	TSS1500	0.90707	0.929941	0.815407	0.882772	0.88264	0.805292	0.89334	0.906834	0.877912	0.891325	0.837708	0.805357	0.822268	0.877298	0.633431	0.927674	0.898527	0.836698
cg21050637	ACPT	N_Shelf	TSS1500	0.739856	0.798113	0.765254	0.850911	0.774261	0.820863	0.77754	0.8347	0.795187	0.855109	0.830307	0.693141	0.67716	0.829773	0.604938	0.795941	0.851497	0.767233
cg21136345	ACPT	N_Shore	TSS1500	0.684834	0.756585	0.644706	0.699671	0.73201	0.71101	0.635887	0.712786	0.697186	0.765922	0.690904	0.568079	0.616956	0.703709	0.51391	0.692947	0.659452	0.651485
cg22277847	ACPT	N_Shore	TSS200	0.844337	0.94869	0.827216	0.90309	0.926052	0.929308	0.855448	0.902767	0.892114	0.899405	0.900239	0.849924	0.791447	0.796173	0.867936	0.923721	0.872988	0.862729
	ACPT											0.81854									0.784501
cg00080682	ACR		TSS200	0.764048	0.792967	0.706572	0.786812	0.823257	0.847557	0.76689	0.81503	0.787892	0.827519	0.875073	0.586767	0.770122	0.737887	0.577507	0.763137	0.770275	0.738536
cg05615487	ACR		TSS1500	0.737693	0.8471	0.679527	0.775056	0.807317	0.784833	0.811027	0.767331	0.776236	0.806235	0.871041	0.609487	0.698158	0.784132	0.559093	0.815939	0.796875	0.74262
cg10954062	ACR		TSS1500	0.772174	0.910298	0.80226	0.84372	0.852946	0.865854	0.822401	0.850776	0.840054	0.918596	0.894852	0.739651	0.834336	0.799499	0.707301	0.798741	0.859807	0.819098
cg14596330	ACR		TSS200	0.440873	0.534188	0.443541	0.555878	0.476446	0.549428	0.470441	0.488671	0.494933	0.556148	0.56623	0.3808	0.495124	0.578372	0.386445	0.532782	0.506055	0.500244
cg25232725	ACR		TSS1500	0.767845	0.8623	0.688376	0.797266	0.804785	0.832068	0.761792	0.781268	0.786962	0.760908	0.880278	0.665745	0.831279	0.81353	0.567854	0.843433	0.797962	0.770124
cg26034629	ACR		TSS1500	0.818197	0.896469	0.805712	0.795621	0.863346	0.766864	0.859255	0.83862	0.83051	0.716424	0.872771	0.717109	0.720044	0.857884	0.568416	0.884875	0.82641	0.770492
cg27236246	ACR		TSS1500	0.716919	0.835208	0.718131	0.757521	0.742824	0.783596	0.716592	0.751448	0.75278	0.787239	0.839036	0.605683	0.685229	0.764373	0.546769	0.802233	0.746998	0.722195
	ACR											0.752767									0.72333
cg00014837	ACRBP	S_Shore	TSS1500	0.922924	0.940516	0.91358	0.920471	0.897257	0.93472	0.938871	0.901799	0.921267	0.945541	0.924177	0.923021	0.889437	0.912288	0.887928	0.936695	0.928817	0.918488
cg04368332	ACRBP	Island	TSS200	0.210739	0.233959	0.0620327	0.320334	0.309895	0.468543	0.0838534	0.177889	0.233406	0.191571	0.219168	0.188097	0.135425	0.209357	0.072488	0.2444	0.113487	0.171749
cg07694975	ACRBP	Island	TSS200	0.253817	0.258853	0.151149	0.325296	0.34922	0.489958	0.181806	0.264359	0.284307	0.309908	0.343986	0.243597	0.262695	0.300589	0.168491	0.33388	0.162069	0.265652
cg12007596	ACRBP	Island	TSS200	0.179905	0.209516	0.0794691	0.275047	0.282763	0.463942	0.112557	0.235177	0.229797	0.298603	0.2736	0.207335	0.250957	0.214418	0.0846316	0.267319	0.126849	0.215464
cg13295812	ACRBP	S_Shore	TSS1500	0.90573	0.835624	0.798657	0.841911	0.866765	0.909902	0.869266	0.750692	0.847318	0.762899	0.776456	0.886597	0.898662	0.876338	0.871367	0.916718	0.793949	0.847873
cg23983517	ACRBP	S_Shore	TSS200	0.46321	0.531575	0.368183	0.543677	0.487914	0.646656	0.449071	0.495101	0.498173	0.586517	0.483129	0.507343	0.481212	0.408942	0.328522	0.526406	0.362853	0.460615
	ACRBP											0.502378									0.479974
cg07153965	ACRV1		TSS1500;TSS1500;TSS1500;TSS1500;TSS1500;TSS1500;TSS1500;TSS1500;TSS1500	0.608742	0.672517	0.776823	0.641722	0.549682	0.748766	0.67296	0.765977	0.679649	0.811812	0.731889	0.696326	0.832582	0.523765	0.639006	0.569569	0.658657	0.682951
cg07665222	ACRV1		TSS1500;TSS1500;TSS1500;TSS1500;TSS1500;TSS1500;TSS1500;TSS1500;TSS1500	0.772817	0.733008	0.790814	0.698188	0.569915	0.763442	0.696965	0.721556	0.718338	0.689663	0.666784	0.677216	0.764607	0.597844	0.699286	0.621349	0.699024	0.676972
cg09588284	ACRV1		TSS1500;TSS1500;TSS1500;TSS1500;TSS1500;TSS1500;TSS1500;TSS1500;TSS1500	0.774406	0.847321	0.834217	0.760039	0.832439	0.888892	0.8697	0.861321	0.833542	0.890154	0.860301	0.847754	0.810401	0.803085	0.694671	0.824064	0.827026	0.819682
cg11033609	ACRV1		TSS1500;TSS1500;TSS1500;TSS1500	0.841475	0.862621	0.897968	0.836161	0.799904	0.905559	0.902866	0.884206	0.866345	0.92887	0.877854	0.891533	0.876248	0.836749	0.898496	0.882861	0.895159	0.885971
cg22361409	ACRV1		TSS1500;TSS1500;TSS1500;TSS1500	0.709368	0.704229	0.794936	0.724473	0.720747	0.811146	0.814664	0.754192	0.754219	0.628362	0.803544	0.787513	0.835953	0.772732	0.818851	0.761773	0.759142	0.770984
	ACRV1											0.770419									0.767312
cg03323498	ACSBG1		TSS1500;TSS1500	0.893803	0.91379	0.806206	0.895796	0.899616	0.917083	0.898024	0.872905	0.887153	0.834738	0.897312	0.881655	0.900033	0.898968	0.888697	0.932231	0.884776	0.889801
cg05399703	ACSBG1		TSS1500	0.792265	0.872187	0.716757	0.842869	0.840332	0.851533	0.858517	0.856982	0.82893	0.865493	0.868222	0.848009	0.858252	0.859315	0.860126	0.860771	0.876084	0.862034
cg13642872	ACSBG1		TSS1500	0.834747	0.897415	0.714251	0.835161	0.884391	0.888989	0.807936	0.814121	0.834626	0.830169	0.862599	0.841693	0.893823	0.870979	0.819547	0.905814	0.866301	0.861366
cg27087809	ACSBG1		TSS1500	0.896835	0.87352	0.775249	0.83835	0.871064	0.878374	0.902539	0.836692	0.859078	0.892863	0.914975	0.814466	0.87012	0.859739	0.789462	0.904094	0.859778	0.863187
	ACSBG1											0.852447									0.869097
cg01452549	ACSBG2		TSS1500	0.871943	0.845106	0.797718	0.888588	0.861107	0.92184	0.856043	0.909193	0.868942	0.9114	0.917096	0.822765	0.891751	0.833	0.874504	0.915479	0.888319	0.881789
cg07220354	ACSBG2		TSS1500;TSS1500;TSS1500;TSS1500;TSS1500	0.943188	0.950082	0.897115	0.931658	0.943048	0.948147	0.938813	0.945865	0.93724	0.939906	0.951889	0.941238	0.959022	0.941325	0.939361	0.947632	0.937628	0.94475
cg08256781	ACSBG2		TSS200	0.834847	0.88586	0.758419	0.909098	0.841545	0.918735	0.7439	0.87816	0.846321	0.914115	0.913576	0.843413	0.800467	0.815582	0.856447	0.879882	0.871457	0.861867
cg13996999	ACSBG2		TSS200	0.76385	0.892569	0.730028	0.883897	0.868151	0.878208	0.747811	0.849206	0.826715	0.891726	0.886335	0.782231	0.769032	0.839092	0.860669	0.883828	0.858489	0.846425
cg20418206	ACSBG2		TSS200;TSS200;TSS200;TSS200;TSS200	0.694621	0.85107	0.603969	0.775963	0.734567	0.839864	0.633317	0.693022	0.728299	0.831765	0.845449	0.673162	0.779922	0.756593	0.779443	0.767135	0.685062	0.764816
cg23436468	ACSBG2		TSS1500;TSS1500;TSS1500;TSS1500;TSS1500	0.909746	0.940072	0.852057	0.907568	0.88124	0.936628	0.930097	0.917571	0.909372	0.931347	0.93359	0.869512	0.932893	0.911685	0.903987	0.930104	0.884476	0.912199
cg27274989	ACSBG2		TSS1500	0.561595	0.769278	0.574589	0.734089	0.67979	0.85403	0.585663	0.653272	0.676538	0.790965	0.825941	0.592699	0.692608	0.710856	0.727833	0.733073	0.561966	0.704493
	ACSBG2											0.827632									0.845191
cg01952843	ACSF2	Island	TSS200;TSS200;TSS200;TSS200;TSS200;TSS200	0.00852223	0.0119978	0.00944483	0.0123747	0.00891813	0.00869281	0.00891817	0.00965459	0.00981541	0.0197705	0.00967302	0.00950805	0.0100594	0.0156658	0.00807988	0.00607534	0.00939775	0.0110287
cg02323029	ACSF2	Island	TSS200;TSS200;TSS200;TSS200;TSS200;TSS200	0.023317	0.0319832	0.0290527	0.0325509	0.0320644	0.139156	0.0369623	0.0203163	0.0431754	0.272374	0.165034	0.0490019	0.208415	0.0552759	0.0928538	0.143687	0.0489324	0.129447
cg03919657	ACSF2	N_Shore	TSS1500	0.689553	0.752605	0.576202	0.748379	0.720342	0.749532	0.689178	0.718512	0.705538	0.705025	0.798496	0.741951	0.699596	0.77244	0.778228	0.686177	0.763423	0.743167
cg04843775	ACSF2	Island	TSS200	0.0314965	0.0221795	0.0192794	0.0206291	0.0187163	0.0165593	0.022069	0.0166268	0.0209445	0.0394989	0.0182031	0.0167999	0.0267308	0.0292072	0.0238026	0.0166194	0.0190913	0.0237442
cg14672994	ACSF2	Island	TSS1500	0.0755466	0.0616975	0.0594566	0.0613727	0.0831977	0.49401	0.101448	0.0442806	0.122626	0.450787	0.435784	0.29862	0.418388	0.133831	0.298079	0.366734	0.238841	0.330133
cg19748341	ACSF2	Island	TSS200	0.0302431	0.0308598	0.0244994	0.039892	0.0287959	0.154305	0.0309274	0.024224	0.0454683	0.185479	0.191411	0.0503896	0.223248	0.0869961	0.113986	0.138156	0.0573868	0.130882
cg20066567	ACSF2	Island	TSS200;TSS200;TSS200;TSS200;TSS200;TSS200	0.0255022	0.0199457	0.0155261	0.0192198	0.0168625	0.0479478	0.0221529	0.0132695	0.0225533	0.135413	0.0609667	0.0254696	0.138432	0.0361579	0.0287179	0.0533469	0.0174707	0.0619968
cg22002216	ACSF2	N_Shore	TSS1500	0.569153	0.585345	0.727896	0.684116	0.590506	0.856556	0.779819	0.72898	0.690296	0.817346	0.790501	0.732756	0.777937	0.657144	0.731705	0.672848	0.696079	0.73454
cg23674344	ACSF2	Island	TSS1500	0.0864321	0.0369483	0.0352334	0.034885	0.0483108	0.586805	0.116343	0.0287712	0.121716	0.443365	0.467618	0.375875	0.504685	0.245856	0.509666	0.505956	0.324281	0.422163
cg25113009	ACSF2	Island	TSS1500;TSS1500;TSS1500;TSS1500;TSS1500;TSS1500	0.0134542	0.022687	0.015756	0.0199939	0.0153735	0.047032	0.0156134	0.0133381	0.020406	0.116443	0.0570234	0.0230664	0.130681	0.026257	0.0293725	0.0858607	0.0203827	0.0611358
	ACSF2											0.180254									0.264824
cg01765220	ACSF3	Island	TSS200;TSS200;TSS200	0.0284025	0.0181493	0.0122108	0.0155311	0.00984388	0.011435	0.00966105	0.0114608	0.0145868	0.0103523	0.00956164	0.0161274	0.0240336	0.0450464	0.0124753	0.0126767	0.00973799	0.0175014
cg04753738	ACSF3	Island	TSS200;TSS200;TSS200	0.0120394	0.0175435	0.0120554	0.0148415	0.0172621	0.0115509	0.0135763	0.0115391	0.013801	0.0135415	0.0124998	0.0143832	0.0141981	0.028917	0.0249904	0.0109154	0.0133771	0.0166028
cg05521982	ACSF3	N_Shore	TSS1500;TSS1500;TSS1500	0.229427	0.228822	0.23218	0.198009	0.315568	0.205917	0.19824	0.17572	0.222985	0.135716	0.121837	0.247923	0.176533	0.232689	0.236709	0.185951	0.166537	0.187987
cg10156586	ACSF3	Island	TSS1500;TSS1500;TSS1500	0.0813286	0.101185	0.0601499	0.0848622	0.06565	0.0678412	0.0755868	0.0411243	0.072216	0.116827	0.0275068	0.0527651	0.153373	0.137333	0.0702722	0.0284341	0.0391655	0.0782096
cg11476254	ACSF3	N_Shore	TSS1500;TSS1500;TSS1500	0.937783	0.959349	0.943795	0.945044	0.953127	0.954206	0.953896	0.954602	0.950225	0.958485	0.954257	0.943504	0.943856	0.945968	0.941066	0.946762	0.953254	0.948394
cg17690303	ACSF3	N_Shore	TSS1500;TSS1500;TSS1500;TSS1500;TSS1500	0.546077	0.623913	0.498148	0.599703	0.58748	0.617076	0.546951	0.525447	0.568099	0.612658	0.56842	0.530943	0.471578	0.555911	0.446846	0.607204	0.579525	0.546636
cg17782702	ACSF3	N_Shore	TSS1500;TSS1500;TSS1500;TSS1500;TSS1500	0.858798	0.883507	0.833252	0.87137	0.855637	0.888795	0.847557	0.843553	0.860309	0.622099	0.84628	0.803269	0.809012	0.874159	0.806728	0.854608	0.848832	0.808123
cg18963774	ACSF3	N_Shore	TSS1500;TSS1500;TSS1500;TSS1500;TSS1500	0.938102	0.94141	0.924224	0.944323	0.934345	0.941768	0.933551	0.935796	0.93669	0.872923	0.92939	0.902191	0.940371	0.931212	0.903131	0.948618	0.945163	0.921625
cg23933411	ACSF3	Island	TSS200;TSS200;TSS200;TSS200;TSS200	0.0291158	0.0429856	0.041314	0.0482834	0.0466519	0.0247703	0.0351909	0.031283	0.0374494	0.0240197	0.0298254	0.0505623	0.0345574	0.0904876	0.0412469	0.021084	0.0366367	0.0410525
cg27495617	ACSF3	Island	TSS1500;TSS1500;TSS1500	0.0206718	0.0208639	0.021351	0.0229581	0.0219151	0.0272585	0.0150269	0.0201285	0.0212717	0.0213563	0.0194063	0.0221313	0.0229125	0.0275481	0.0224729	0.0167266	0.020115	0.0215836
	ACSF3											0.369763									0.358771
cg02299441	ACSL1	S_Shore	TSS1500;TSS1500	0.447589	0.47854	0.405598	0.477512	0.519975	0.30787	0.528237	0.412508	0.447229	0.342148	0.349353	0.375837	0.290431	0.533766	0.346739	0.438964	0.414047	0.386411
cg03768017	ACSL1	Island	TSS200	0.0116523	0.0379059	0.00977379	0.0130507	0.0117739	0.0104281	0.00959475	0.0127925	0.0146215	0.0278865	0.0130787	0.0128767	0.0270109	0.100176	0.0132396	0.00904991	0.0151373	0.027307
cg07619799	ACSL1	Island	TSS200	0.0924681	0.0925437	0.0406715	0.0562032	0.0431701	0.020283	0.0851676	0.0319297	0.0578046	0.185841	0.0250655	0.041301	0.190763	0.154434	0.0429556	0.0700459	0.0393272	0.0937166
cg07942479	ACSL1	S_Shore	TSS1500	0.214024	0.120334	0.114327	0.241271	0.214861	0.0498589	0.132279	0.13236	0.152414	0.0360668	0.118534	0.0701495	0.0567021	0.273009	0.111916	0.106143	0.15761	0.116266
cg19487718	ACSL1	Island	TSS1500	0.0495344	0.0805791	0.0366087	0.0487697	0.0602667	0.0475908	0.0356552	0.0323333	0.0489172	0.0629512	0.0324474	0.0385505	0.0534993	0.0962158	0.0553485	0.0563011	0.0387985	0.054264
cg20986484	ACSL1	S_Shore	TSS1500;TSS1500	0.348574	0.21801	0.19901	0.329241	0.447098	0.153564	0.417664	0.172176	0.285667	0.102564	0.124364	0.179529	0.0674618	0.420008	0.20229	0.377578	0.249598	0.215424
cg21390575	ACSL1	Island	TSS1500	0.0871425	0.121391	0.0512117	0.0634489	0.0882739	0.0601784	0.050232	0.0454172	0.070912	0.109405	0.0335187	0.0390597	0.147005	0.111367	0.0513916	0.0489224	0.0551528	0.0744778
cg21666986	ACSL1	S_Shore	TSS1500;TSS1500	0.808479	0.870388	0.734394	0.850564	0.836726	0.87205	0.854787	0.853727	0.835139	0.794783	0.837696	0.821012	0.836773	0.875444	0.73882	0.62829	0.820747	0.794196
cg23684603	ACSL1	Island	TSS200	0.0816284	0.102644	0.0623814	0.0521035	0.0587322	0.057568	0.0779402	0.0384165	0.0664268	0.168818	0.044106	0.0795855	0.202202	0.16452	0.0568968	0.0497492	0.0647881	0.103833
cg24170415	ACSL1	Island	TSS1500	0.129118	0.102454	0.085728	0.10409	0.109365	0.107809	0.107691	0.0567034	0.10037	0.173206	0.0766822	0.0927465	0.172534	0.153039	0.0825482	0.102023	0.0786343	0.116427
cg24521685	ACSL1	S_Shore	TSS1500;TSS1500	0.85298	0.901989	0.799345	0.892138	0.87228	0.860751	0.852704	0.88187	0.864257	0.88402	0.887332	0.853947	0.84828	0.866913	0.850368	0.829877	0.901119	0.865232
cg24989061	ACSL1	Island	TSS200	0.0433845	0.0549764	0.0361763	0.0449184	0.0367434	0.0380931	0.030803	0.0268274	0.0389903	0.076864	0.0302941	0.043434	0.155423	0.126613	0.0471659	0.0269914	0.0518746	0.0698325
cg27391710	ACSL1	Island	TSS200	0.015006	0.0171074	0.0142392	0.0158993	0.0157517	0.0121128	0.0128571	0.0150296	0.0147504	0.0198883	0.0141529	0.0134577	0.0167794	0.0237265	0.0157544	0.010928	0.0149473	0.0162043
	ACSL1											0.230577									0.225661
cg01233736	ACSL3	Island	TSS200;TSS200	0.0119236	0.00468047	0.0123647	0.0155284	0.0129998	0.0125696	0.0105952	0.0126101	0.011659	0.0120136	0.0118428	0.0115997	0.0122466	0.0168036	0.0123454	0.00911232	0.0111458	0.0121387
cg04589048	ACSL3	N_Shore	TSS1500;TSS1500	0.677282	0.760388	0.662927	0.691739	0.697354	0.380951	0.737313	0.609804	0.65222	0.775898	0.523662	0.54981	0.490702	0.709937	0.543727	0.595939	0.607637	0.599664
cg16436647	ACSL3	N_Shore	TSS1500;TSS1500	0.227047	0.196498	0.263954	0.165148	0.239963	0.141751	0.214785	0.285858	0.216875	0.451786	0.185029	0.195862	0.20336	0.214991	0.189028	0.113513	0.15769	0.213907
cg21498125	ACSL3	N_Shore	TSS1500;TSS1500	0.0404789	0.0323244	0.0317942	0.0327781	0.0367062	0.0501241	0.0353721	0.0341655	0.0367179	0.0183336	0.0215247	0.0428913	0.0334348	0.0355139	0.0280846	0.0346845	0.0288603	0.030416
cg23325384	ACSL3	N_Shore	TSS1500;TSS1500	0.565567	0.639591	0.69089	0.649428	0.644858	0.364449	0.58247	0.562793	0.587506	0.609046	0.360634	0.501018	0.367897	0.614445	0.432584	0.552725	0.582702	0.502631
	ACSL3											0.300996									0.271751
cg00209850	ACSL4	Island	TSS200;TSS200	0.0421532	0.0330382	0.0259147	0.0402326	0.0491573	0.0360869	0.0244283	0.0302077	0.0351524	0.0197246	0.0346382	0.0326897	0.0400604	0.0399433	0.0393142	0.0273769	0.0404424	0.0342737
cg05383895	ACSL4	Island	TSS200;TSS200	0.0303099	0.0211013	0.0239869	0.0260884	0.0261472	0.0269727	0.0258222	0.0229502	0.0254223	0.019285	0.0239134	0.0231223	0.0277067	0.033882	0.0248501	0.0260681	0.0213902	0.0250272
cg05441864	ACSL4	Island	TSS1500;TSS1500	0.0618713	0.0430046	0.0529529	0.0542034	0.0497415	0.0452488	0.0447214	0.043437	0.0493976	0.0614454	0.0536034	0.0499227	0.0543003	0.0711465	0.0499314	0.0452703	0.0399269	0.0531934
cg09091181	ACSL4	Island	TSS200;TSS200	0.0276321	0.0204326	0.0190335	0.0213399	0.0192508	0.0214153	0.0202542	0.0179096	0.0209085	0.0181106	0.0177892	0.0200947	0.0299115	0.0291426	0.0204928	0.0249708	0.0187455	0.0224072
cg13688687	ACSL4	Island	TSS200;TSS200	0.0106881	0.010138	0.0121741	0.0149988	0.0121429	0.0116926	0.0108755	0.0126017	0.011914	0.0221622	0.0117034	0.0120325	0.0153027	0.0219178	0.0111693	0.00724629	0.0138699	0.0144255
cg14457256	ACSL4	S_Shore	TSS1500;TSS1500	0.601937	0.656328	0.584649	0.593435	0.655851	0.776017	0.642402	0.579387	0.636251	0.828416	0.708787	0.621997	0.752309	0.644991	0.719786	0.685088	0.596549	0.69474
cg19635884	ACSL4	Island	TSS1500;TSS1500	0.0294267	0.0210434	0.0241959	0.0262769	0.0265471	0.0235567	0.0228049	0.0221896	0.0245051	0.0185021	0.0223194	0.0241398	0.0460929	0.0300335	0.027031	0.0231713	0.0213369	0.0265784
cg20767561	ACSL4	Island	TSS200;TSS200	0.0206545	0.0188859	0.0184844	0.0195239	0.0198069	0.0179635	0.0177396	0.0168682	0.0187409	0.0397049	0.0202804	0.0195824	0.0224176	0.0245276	0.0176191	0.0176821	0.0182671	0.0225102
cg23113041	ACSL4	Island	TSS200;TSS200	0.0216795	0.0180055	0.0188613	0.021974	0.0205208	0.0190193	0.0176986	0.0174478	0.0194008	0.0208662	0.0183021	0.0191145	0.031115	0.0277815	0.0197087	0.0179157	0.0183492	0.0216441
cg26119746	ACSL4	Island	TSS1500;TSS1500	0.0207311	0.0342709	0.0286777	0.0279156	0.029232	0.0263001	0.0238707	0.0241297	0.026891	0.0638027	0.0278357	0.0262042	0.0652764	0.0406535	0.0337098	0.0149431	0.0294751	0.0377376
	ACSL4											0.0868583									0.0952538
cg01925508	ACSL5		TSS1500;TSS1500	0.799298	0.787984	0.783757	0.809822	0.794394	0.814196	0.755192	0.771935	0.789572	0.822839	0.745116	0.797172	0.63275	0.755166	0.8267	0.737889	0.75999	0.759703
cg11079635	ACSL5		TSS1500;TSS200	0.812517	0.871697	0.845469	0.86239	0.852447	0.821114	0.850443	0.81435	0.841303	0.854517	0.723997	0.8416	0.397622	0.881414	0.85897	0.808881	0.787914	0.769364
cg11152574	ACSL5		TSS1500;TSS1500;5'UTR	0.882478	0.912607	0.902607	0.914461	0.913804	0.910656	0.895224	0.90095	0.904098	0.886257	0.886851	0.873166	0.884563	0.904077	0.900569	0.90948	0.901499	0.893308
cg13333374	ACSL5		TSS1500	0.841247	0.908773	0.800865	0.85013	0.88059	0.836385	0.871344	0.881326	0.858832	0.898339	0.873583	0.866683	0.865682	0.884569	0.847489	0.798783	0.835653	0.858848
cg13849691	ACSL5		TSS1500	0.958132	0.952663	0.949404	0.958356	0.944825	0.96013	0.958111	0.958543	0.95502	0.949406	0.955975	0.949881	0.952182	0.946023	0.956616	0.94551	0.958545	0.951767
cg14930775	ACSL5		TSS1500;TSS1500	0.900205	0.916955	0.858437	0.869394	0.917026	0.900317	0.878135	0.884688	0.890645	0.92621	0.799169	0.89337	0.752761	0.886277	0.891527	0.879263	0.827975	0.857069
cg18733757	ACSL5		TSS1500;TSS200;5'UTR	0.368995	0.457753	0.269131	0.390856	0.433102	0.499012	0.44188	0.337577	0.399788	0.564785	0.299685	0.274223	0.367855	0.497267	0.507423	0.375031	0.26667	0.394117
cg20707765	ACSL5		TSS1500;TSS1500	0.827033	0.823651	0.868118	0.85489	0.85241	0.796179	0.825818	0.810751	0.832356	0.738547	0.781156	0.856252	0.675724	0.819231	0.85848	0.830401	0.836923	0.799589
cg25780389	ACSL5		TSS1500;TSS200;5'UTR	0.65826	0.711724	0.435877	0.577206	0.65455	0.860228	0.707227	0.499645	0.63809	0.753606	0.634556	0.608338	0.628701	0.708376	0.712846	0.714724	0.494736	0.656985
	ACSL5											0.789967									0.771195
cg01185278	ACSL6	S_Shore	TSS1500;TSS1500	0.374314	0.4435	0.343579	0.312412	0.377816	0.311269	0.33567	0.368475	0.358379	0.371017	0.391082	0.315098	0.353918	0.326252	0.305282	0.306666	0.278826	0.331018
cg01573938	ACSL6	Island	TSS1500;TSS1500	0.0198705	0.0189346	0.0232518	0.0198072	0.0205867	0.0174742	0.0158697	0.0218224	0.0197021	0.0155839	0.0195312	0.0187549	0.0227103	0.01785	0.017446	0.0176535	0.0214337	0.0188704
cg04206517	ACSL6	Island	TSS1500;TSS1500	0.0731006	0.126499	0.0761879	0.0951578	0.0637369	0.0289942	0.031946	0.058391	0.0692517	0.0411053	0.0554685	0.0521232	0.0833009	0.109726	0.0559987	0.0279581	0.0721218	0.0622253
cg04291932	ACSL6	S_Shore	TSS1500;TSS1500;TSS1500;TSS200;TSS1500;TSS1500	0.141459	0.110438	0.134885	0.116876	0.116396	0.119669	0.131201	0.126087	0.124626	0.184459	0.128133	0.128937	0.152945	0.14816	0.126421	0.123729	0.10652	0.137413
cg05281116	ACSL6	S_Shore	TSS1500;TSS1500;TSS1500;TSS1500;TSS1500;TSS1500	0.464933	0.578023	0.436733	0.436541	0.465651	0.388948	0.426776	0.467229	0.458104	0.520779	0.508842	0.417519	0.484441	0.485522	0.405662	0.428637	0.398959	0.456295
cg05428655	ACSL6	Island	TSS1500;TSS1500;TSS1500;TSS200;TSS200;TSS200	0.132539	0.157335	0.112712	0.11083	0.122837	0.0924599	0.118018	0.0599399	0.113334	0.159657	0.0645282	0.0965376	0.150948	0.145401	0.113079	0.0757644	0.0823501	0.111033
cg07841119	ACSL6	S_Shore	TSS1500;TSS1500;TSS1500;TSS1500;TSS1500;TSS1500	0.279293	0.252281	0.347187	0.316872	0.259313	0.56472	0.29721	0.358196	0.334384	0.640761	0.511092	0.443468	0.422356	0.290024	0.5216	0.37384	0.362198	0.445667
cg07870237	ACSL6	S_Shore	TSS1500;TSS1500	0.176781	0.143031	0.254667	0.225092	0.202743	0.513144	0.243404	0.216349	0.246901	0.568755	0.425198	0.367916	0.328513	0.217492	0.452937	0.358021	0.291807	0.37633
cg11342715	ACSL6	S_Shore	TSS1500	0.597052	0.591508	0.619521	0.629044	0.583231	0.718388	0.597072	0.653921	0.623717	0.698204	0.657753	0.64519	0.655423	0.597759	0.69097	0.609612	0.648318	0.650404
cg12854656	ACSL6	S_Shore	TSS1500;TSS1500	0.874701	0.912896	0.882825	0.880768	0.88299	0.883865	0.910769	0.928794	0.894701	0.912929	0.907602	0.894061	0.88289	0.887668	0.822015	0.857808	0.888988	0.881745
cg18254147	ACSL6	Island	TSS1500;TSS1500	0.0265981	0.027758	0.0312529	0.0296407	0.0332256	0.0222594	0.0155956	0.0258598	0.0265238	0.0179899	0.0229848	0.0247623	0.0227975	0.0262801	0.0246944	0.0202359	0.0231842	0.0228661
cg19986872	ACSL6	Island	TSS1500;TSS1500	0.0884899	0.120548	0.0756837	0.0814992	0.0816476	0.0405566	0.0878825	0.0563198	0.0790784	0.0727103	0.0366836	0.0574306	0.0947932	0.0920068	0.0701208	0.0478272	0.0506187	0.0652739
cg20353857	ACSL6	S_Shore	TSS1500;TSS1500;TSS1500;TSS200;TSS1500;TSS1500	0.131708	0.102783	0.13194	0.112264	0.121273	0.107915	0.128657	0.0977708	0.116789	0.139279	0.106761	0.113309	0.137366	0.141713	0.11445	0.0990489	0.102407	0.119292
cg21624556	ACSL6	Island	TSS1500;TSS1500;TSS1500;1stExon;TSS200;TSS200;5'UTR	0.0198754	0.021496	0.0195542	0.0195604	0.0180082	0.0191656	0.0162143	0.0180593	0.0189917	0.017686	0.0190547	0.019133	0.018961	0.0220212	0.0192834	0.0161249	0.0179784	0.0187803
cg25809784	ACSL6	S_Shore	TSS1500	0.815675	0.787095	0.806414	0.880152	0.772658	0.88934	0.799333	0.884838	0.829438	0.878486	0.857261	0.808841	0.839295	0.802347	0.85287	0.772899	0.855201	0.8334
cg27577143	ACSL6	Island	TSS1500;TSS1500;TSS1500;1stExon;TSS200;TSS200;5'UTR	0.00868001	0.0178337	0.0100911	0.0119901	0.0119056	0.0109998	0.00890012	0.0110632	0.011433	0.016792	0.00964443	0.00984371	0.0120551	0.0157968	0.0101127	0.00765775	0.0108987	0.0116001
	ACSL6											0.270335									0.283888
cg02009395	ACSM1		TSS200	0.760959	0.706035	0.638174	0.716615	0.718548	0.202302	0.634101	0.666187	0.630365	0.701593	0.594464	0.483668	0.573205	0.723287	0.651373	0.583092	0.755397	0.63326
cg09620718	ACSM1		TSS1500	0.7312	0.590505	0.630867	0.683937	0.699534	0.256579	0.704704	0.574657	0.608998	0.756956	0.410265	0.616144	0.563853	0.749494	0.580612	0.40063	0.575813	0.581721
cg09967487	ACSM1		TSS1500	0.582883	0.689745	0.620057	0.589679	0.596806	0.380514	0.583323	0.596064	0.579884	0.838008	0.448831	0.5287	0.462877	0.60516	0.652348	0.405034	0.517431	0.557299
cg10081980	ACSM1		TSS1500	0.471226	0.552439	0.490717	0.551881	0.585454	0.491698	0.545151	0.516351	0.525615	0.581906	0.441073	0.456572	0.378823	0.588087	0.531234	0.487975	0.518075	0.497968
cg13619990	ACSM1		TSS1500	0.447201	0.427273	0.256971	0.349629	0.344324	0.234567	0.433539	0.399968	0.361684	0.566919	0.329428	0.337649	0.322893	0.506287	0.375834	0.270953	0.400082	0.388756
cg24447108	ACSM1		TSS1500	0.595265	0.589024	0.562808	0.578524	0.609111	0.348519	0.569394	0.550763	0.550426	0.838765	0.402834	0.535275	0.456211	0.554568	0.591536	0.397634	0.518171	0.536874
	ACSM1											0.542829									0.532646
cg00394823	ACSM3		TSS200;TSS200	0.14847	0.125461	0.136231	0.175922	0.137765	0.110516	0.17039	0.0680945	0.134106	0.0801102	0.106381	0.0953197	0.127247	0.179106	0.108334	0.10394	0.130163	0.116325
cg00430039	ACSM3		TSS1500;TSS1500	0.525073	0.569879	0.610395	0.647711	0.564599	0.662339	0.620099	0.544417	0.593064	0.587345	0.568763	0.526305	0.661096	0.591345	0.590076	0.653072	0.613472	0.598934
cg06478823	ACSM3		TSS1500;TSS1500	0.150267	0.155995	0.166535	0.20376	0.185738	0.109465	0.23275	0.0923246	0.162104	0.142797	0.0730201	0.110086	0.108487	0.230871	0.113705	0.134283	0.123374	0.129578
cg08833631	ACSM3		TSS1500;TSS1500	0.678107	0.770576	0.803648	0.73979	0.764831	0.723883	0.748482	0.763698	0.749127	0.725609	0.647392	0.704686	0.655041	0.779751	0.804069	0.723403	0.756296	0.724531
cg10060338	ACSM3		TSS1500;TSS1500	0.0756995	0.092291	0.0804255	0.10403	0.0940725	0.0618227	0.0741973	0.0944591	0.0846247	0.0779068	0.0706133	0.0797093	0.074131	0.106652	0.0651983	0.0635765	0.0762802	0.0767584
cg10078415	ACSM3		TSS1500;TSS1500	0.171984	0.141994	0.14783	0.186465	0.149034	0.107674	0.202848	0.0993088	0.150892	0.0533002	0.0876909	0.0833909	0.124139	0.172884	0.116916	0.123003	0.131766	0.111636
cg18062511	ACSM3		TSS200;TSS200	0.0320941	0.0350492	0.0334834	0.0414667	0.0304574	0.0251028	0.0365327	0.0232379	0.032178	0.0229566	0.0252946	0.0299926	0.0209983	0.0378816	0.0256169	0.0193013	0.0311268	0.0266461
cg22499925	ACSM3		TSS200;TSS200	0.123576	0.107527	0.100826	0.147794	0.117987	0.0967445	0.130283	0.0565851	0.110165	0.0687789	0.0980401	0.107662	0.109555	0.130507	0.103112	0.112827	0.106341	0.104603
	ACSM3											0.252033									0.236126
cg03612990	ACSM4		TSS1500	0.780531	0.895517	0.799389	0.836356	0.836619	0.8408	0.846994	0.814015	0.831278	0.616281	0.681286	0.791472	0.610104	0.752107	0.511383	0.840369	0.854082	0.707135
cg04136123	ACSM4		TSS1500	0.919068	0.942331	0.864518	0.91686	0.896621	0.744391	0.91367	0.913378	0.888855	0.538997	0.802084	0.884114	0.706031	0.91699	0.644626	0.943638	0.914849	0.793916
cg19279434	ACSM4		TSS1500	0.676979	0.70269	0.643675	0.715333	0.619812	0.644632	0.680638	0.687368	0.671391	0.462573	0.592577	0.631754	0.507727	0.681689	0.461486	0.750004	0.64842	0.592029
cg21343895	ACSM4		TSS1500	0.685765	0.729903	0.672093	0.735962	0.695032	0.582777	0.720302	0.711841	0.691709	0.496503	0.583616	0.664778	0.483463	0.762448	0.439296	0.782987	0.708468	0.615195
cg24648543	ACSM4		TSS1500	0.52684	0.655723	0.588043	0.582679	0.538498	0.635097	0.675618	0.526876	0.591172	0.386483	0.502751	0.564186	0.453347	0.597577	0.426703	0.576462	0.582242	0.511219
	ACSM4											0.734881									0.643899
cg04428453	ACSM5		TSS1500	0.899219	0.922453	0.902304	0.900553	0.916576	0.892542	0.900824	0.907214	0.905211	0.965873	0.911066	0.902879	0.888036	0.9041	0.859949	0.882184	0.908712	0.90285
cg05300045	ACSM5		TSS200	0.92079	0.943451	0.899065	0.90121	0.922064	0.935975	0.930114	0.929242	0.922739	0.937261	0.927532	0.922273	0.898847	0.925432	0.893201	0.920806	0.931929	0.91966
cg06686156	ACSM5		TSS1500	0.517941	0.501439	0.636826	0.537403	0.567303	0.807108	0.531705	0.470514	0.57128	0.770887	0.781112	0.639392	0.759414	0.527901	0.69007	0.722978	0.616279	0.688504
cg10938486	ACSM5		TSS200	0.301412	0.360064	0.460282	0.374602	0.334311	0.319537	0.33851	0.343795	0.354064	0.552388	0.400733	0.321252	0.358559	0.327284	0.36895	0.204804	0.345196	0.359896
cg21704117	ACSM5		TSS1500	0.907377	0.910562	0.89102	0.920652	0.911122	0.92732	0.922306	0.897619	0.910997	0.931324	0.925355	0.913396	0.942203	0.905814	0.912509	0.924452	0.907425	0.92031
	ACSM5											0.732858									0.758244
cg05913008	ACSM6		TSS1500	0.854856	0.93523	0.833953	0.900595	0.924102	0.928427	0.887151	0.902863	0.895897	0.836019	0.933174	0.877747	0.921567	0.910134	0.839052	0.946523	0.925988	0.898775
cg16131342	ACSM6		TSS1500	0.545413	0.713223	0.67234	0.7161	0.764545	0.674225	0.533066	0.586881	0.650724	0.552819	0.713489	0.469148	0.56725	0.646964	0.597472	0.538792	0.706617	0.599069
	ACSM6											0.773311									0.748922
cg02086310	ACSS1	S_Shore	TSS200	0.116183	0.293161	0.0750341	0.201551	0.211648	0.0451554	0.0895141	0.235381	0.158453	0.0746923	0.0748321	0.10442	0.120323	0.129576	0.1302	0.0352586	0.11343	0.0978415
cg03321508	ACSS1	S_Shore	TSS200	0.139644	0.349006	0.0943367	0.262382	0.299698	0.0494659	0.168197	0.274236	0.204621	0.12393	0.080824	0.0890262	0.176169	0.208068	0.124043	0.0497219	0.101512	0.119162
cg03750993	ACSS1	S_Shore	TSS1500	0.817253	0.862892	0.755794	0.872692	0.842202	0.859868	0.834876	0.837207	0.835348	0.883576	0.884058	0.869744	0.842698	0.849671	0.818873	0.796148	0.866599	0.851421
cg06138080	ACSS1	S_Shore	TSS1500;TSS1500;TSS1500	0.0994473	0.24272	0.0658541	0.172618	0.189773	0.0806251	0.111514	0.163927	0.14081	0.0797357	0.0539044	0.0917422	0.13579	0.147838	0.0980183	0.035813	0.0880611	0.0913628
cg06817113	ACSS1	Island	TSS200;TSS200;TSS200	0.0123003	0.0207237	0.0133655	0.0161918	0.0175461	0.0130387	0.0134231	0.0140471	0.0150795	0.0207084	0.020298	0.0129483	0.0177477	0.0371374	0.013729	0.0120209	0.013787	0.0185471
cg07287961	ACSS1	S_Shore	TSS1500;TSS1500;TSS1500	0.457255	0.610577	0.621411	0.545558	0.488679	0.333294	0.5527	0.60973	0.5274	0.426602	0.373187	0.391573	0.394411	0.46726	0.36364	0.292516	0.440545	0.393717
cg14810385	ACSS1	S_Shore	TSS200	0.164465	0.265838	0.185601	0.247863	0.273443	0.184667	0.193396	0.218773	0.216756	0.19346	0.156609	0.1594	0.22753	0.242195	0.204722	0.199588	0.175314	0.194852
cg19497388	ACSS1	S_Shore	TSS1500	0.899504	0.933196	0.912028	0.919681	0.919805	0.922511	0.936999	0.916418	0.920018	0.860097	0.929567	0.933806	0.923921	0.904082	0.905396	0.917861	0.922685	0.912177
cg22556898	ACSS1	S_Shore	TSS1500	0.806011	0.85479	0.801516	0.803093	0.764683	0.864607	0.865538	0.857416	0.827207	0.885048	0.865821	0.810565	0.879447	0.805163	0.814373	0.797826	0.823482	0.835216
cg24585477	ACSS1	Island	TSS200;TSS200;TSS200	0.0172913	0.0230953	0.0145596	0.0194595	0.0156508	0.0138197	0.0131959	0.0176885	0.0168451	0.018598	0.0202041	0.0151626	0.0197159	0.030729	0.019326	0.0120283	0.0174781	0.0191552
cg26325723	ACSS1	S_Shore	TSS200	0.100691	0.0981398	0.139323	0.10379	0.136914	0.0850437	0.124641	0.0918154	0.110045	0.0549855	0.0700886	0.0920898	0.0789048	0.138557	0.0970238	0.0515168	0.0892601	0.0840533
	ACSS1											0.361144									0.328864
cg03440846	ACSS2	N_Shore	TSS1500	0.587427	0.581618	0.564237	0.594631	0.595129	0.505558	0.629877	0.581667	0.580018	0.673032	0.643355	0.561635	0.575435	0.598419	0.477108	0.479976	0.669654	0.584827
cg04841442	ACSS2	N_Shore	5'UTR;TSS1500;TSS1500	0.334967	0.336949	0.329962	0.334358	0.359326	0.24761	0.393083	0.248403	0.323082	0.173139	0.196213	0.245103	0.168063	0.408313	0.241863	0.22843	0.31713	0.247282
cg06342430	ACSS2	S_Shore	TSS1500;TSS1500	0.909673	0.903546	0.859592	0.883539	0.906714	0.876308	0.891484	0.894206	0.890633	0.86116	0.860958	0.843657	0.768389	0.86909	0.708541	0.8976	0.896586	0.838248
cg07192717	ACSS2	N_Shore	5'UTR;TSS1500;TSS1500	0.285433	0.29144	0.267833	0.271768	0.298589	0.181911	0.333078	0.202975	0.266628	0.166244	0.156075	0.177974	0.179021	0.348968	0.198888	0.171398	0.247137	0.205713
cg09801828	ACSS2	N_Shore	TSS200	0.784234	0.826114	0.702408	0.803673	0.794722	0.826372	0.825872	0.805785	0.796148	0.798669	0.819461	0.786981	0.823113	0.825545	0.783907	0.8049	0.82372	0.808287
cg11889652	ACSS2	N_Shore	TSS1500	0.912079	0.914323	0.915126	0.918448	0.925476	0.923871	0.930612	0.939812	0.922468	0.931934	0.942353	0.927337	0.926966	0.886204	0.905802	0.898492	0.934976	0.919258
cg13368786	ACSS2	N_Shore	Body;TSS1500;TSS1500	0.458404	0.511312	0.267371	0.356613	0.388025	0.346129	0.485832	0.349257	0.395368	0.43839	0.419152	0.394418	0.350171	0.536726	0.346	0.287222	0.378504	0.393823
cg13777294	ACSS2	N_Shore	Body;TSS1500;TSS1500	0.046406	0.0577372	0.0504966	0.0545993	0.0490509	0.0409003	0.0623419	0.0491979	0.0513413	0.108082	0.052817	0.0679283	0.0675561	0.0687393	0.0370354	0.0364856	0.0501294	0.0610966
cg22989379	ACSS2	N_Shore	TSS200	0.851051	0.864689	0.831636	0.864586	0.870952	0.869973	0.855517	0.852557	0.85762	0.811201	0.871474	0.848546	0.849011	0.870711	0.868374	0.864023	0.867229	0.856321
cg26535616	ACSS2	N_Shore	1stExon;5'UTR;TSS1500;TSS1500	0.845146	0.890984	0.802244	0.892104	0.894998	0.906435	0.885648	0.888147	0.875713	0.866434	0.897649	0.867901	0.870274	0.873753	0.867509	0.87213	0.895714	0.876421
	ACSS2											0.595902									0.579128
cg00354572	ACSS3	N_Shore	TSS1500	0.109179	0.0656924	0.117083	0.124964	0.0663119	0.49108	0.11481	0.085973	0.146887	0.662264	0.427429	0.276175	0.395776	0.17622	0.459146	0.327324	0.221843	0.368272
cg01624763	ACSS3	N_Shore	TSS1500	0.258279	0.185192	0.254617	0.288792	0.195033	0.637421	0.263886	0.251364	0.291823	0.672995	0.569825	0.412952	0.513409	0.337143	0.569002	0.484856	0.375962	0.492018
cg04004297	ACSS3	N_Shore	TSS1500	0.925483	0.934118	0.894523	0.944267	0.917207	0.935205	0.918094	0.877338	0.918279	0.94213	0.907603	0.903198	0.925675	0.943225	0.944194	0.986251	0.928594	0.935109
cg08314603	ACSS3	N_Shore	TSS1500	0.0776583	0.0463593	0.111627	0.11115	0.0820977	0.496289	0.0955003	0.0619559	0.13533	0.595743	0.443611	0.279007	0.424302	0.192224	0.463875	0.283153	0.159017	0.355116
cg11659501	ACSS3	Island	TSS200	0.105222	0.0720132	0.132163	0.134205	0.130822	0.507433	0.157654	0.0970607	0.167072	0.510431	0.41861	0.295961	0.391892	0.135388	0.46875	0.332277	0.250553	0.350483
cg13770764	ACSS3	N_Shore	TSS1500	0.856817	0.884627	0.860461	0.881479	0.86822	0.892739	0.865965	0.857407	0.870964	0.884664	0.86589	0.848122	0.871083	0.891716	0.901542	0.891722	0.872236	0.878372
cg20878721	ACSS3	N_Shore	TSS1500	0.878875	0.896138	0.853805	0.896568	0.878369	0.906349	0.8928	0.89826	0.887645	0.87945	0.894481	0.872532	0.890333	0.898192	0.895421	0.912439	0.900268	0.892889
cg21754400	ACSS3	Island	TSS200	0.151191	0.0898133	0.164243	0.160754	0.140953	0.542277	0.186612	0.13863	0.196809	0.472606	0.496603	0.354706	0.427592	0.226262	0.510581	0.409117	0.31969	0.402145
cg23007705	ACSS3	Island	TSS200	0.126753	0.0861873	0.183276	0.153297	0.167301	0.58127	0.180934	0.154652	0.204209	0.570453	0.520004	0.380139	0.466949	0.17687	0.51933	0.401178	0.316844	0.418971
cg23614791	ACSS3	Island	TSS200	0.0340356	0.0270393	0.0398093	0.0354838	0.0298308	0.61344	0.0285068	0.0257052	0.104231	0.557636	0.545928	0.360042	0.384845	0.157582	0.593643	0.465814	0.28077	0.418283
cg25358039	ACSS3	Island	TSS200	0.052198	0.0371423	0.0503843	0.0550014	0.0426829	0.500957	0.0639778	0.0329365	0.10441	0.466166	0.456185	0.287341	0.328679	0.12866	0.442778	0.367444	0.237816	0.339384
cg25971727	ACSS3	N_Shore	TSS1500	0.0435562	0.0361453	0.0469488	0.0496966	0.0470306	0.475818	0.0471931	0.0396308	0.0982524	0.687652	0.304199	0.12324	0.453761	0.10613	0.520359	0.129958	0.0998361	0.303142
	ACSS3											0.343826									0.512849
cg00061145	ACTA1	Island	TSS1500	0.0376588	0.0262885	0.0341637	0.045054	0.0349299	0.62865	0.0290019	0.0367289	0.109059	0.0226168	0.481052	0.0592177	0.0373117	0.0311767	0.0293917	0.54167	0.0302875	0.154091
cg00064261	ACTA1	Island	TSS1500	0.163522	0.143026	0.234977	0.155101	0.177928	0.158081	0.1438	0.158851	0.166911	0.252517	0.353451	0.109005	0.313627	0.166909	0.12492	0.328024	0.139181	0.223454
cg02767613	ACTA1	Island	TSS200	0.135369	0.126392	0.196977	0.114871	0.187872	0.0695506	0.126188	0.1146	0.133977	0.069249	0.427757	0.0856114	0.33118	0.140375	0.0876724	0.49337	0.101978	0.217149
cg04030615	ACTA1	Island	TSS200	0.0762907	0.0642076	0.166454	0.0725781	0.110801	0.0292531	0.0575852	0.0740217	0.0813989	0.0690087	0.365514	0.029505	0.33942	0.120823	0.0506997	0.506309	0.0555938	0.192109
cg05347845	ACTA1	Island	TSS200	0.0288021	0.0710808	0.160958	0.0629133	0.0822989	0.0257347	0.052574	0.0631553	0.0684396	0.0300058	0.465275	0.0340932	0.444265	0.0499433	0.0415224	0.62758	0.0474488	0.217517
cg07777790	ACTA1	Island	TSS1500	0.15448	0.10748	0.211115	0.223698	0.206063	0.346213	0.152914	0.166302	0.196033	0.23108	0.497435	0.251945	0.218623	0.159759	0.131673	0.43063	0.125113	0.255782
cg11689813	ACTA1	Island	TSS1500	0.189906	0.118211	0.295323	0.149709	0.2266	0.16581	0.0989637	0.148667	0.174149	0.229381	0.511031	0.0769984	0.416934	0.160656	0.0818334	0.584566	0.11851	0.272489
cg12908399	ACTA1	Island	TSS1500	0.119757	0.0783226	0.119624	0.120475	0.11296	0.324557	0.127551	0.0809055	0.135519	0.164482	0.338205	0.197868	0.244454	0.117128	0.0881612	0.306045	0.071673	0.191002
cg14852384	ACTA1	Island	TSS200	0.238012	0.209255	0.364361	0.319365	0.316712	0.304103	0.246147	0.250486	0.281055	0.215701	0.50187	0.15876	0.518679	0.286493	0.17675	0.630035	0.213666	0.337744
cg20025656	ACTA1	Island	TSS1500	0.176828	0.139175	0.231594	0.21726	0.223678	0.425735	0.17978	0.250224	0.230534	0.210214	0.444079	0.239254	0.324567	0.196432	0.198232	0.43887	0.116756	0.27105
cg26163852	ACTA1	Island	TSS200	0.121622	0.143213	0.107121	0.116644	0.11841	0.135796	0.110719	0.120289	0.121727	0.0983361	0.22459	0.106976	0.125189	0.138517	0.137711	0.410059	0.0975989	0.167372
	ACTA1											0.154437									0.227251
cg01823005	ACTA2-AS1		TSS1500	0.742429	0.770827	0.768638	0.819457	0.803007	0.758102	0.788123	0.769651	0.777529	0.838692	0.735989	0.741879	0.686612	0.771459	0.789456	0.778893	0.793626	0.767076
cg06098342	ACTA2-AS1		TSS1500	0.567045	0.717115	0.555907	0.611003	0.589223	0.647559	0.525389	0.645977	0.607402	0.696205	0.670265	0.624995	0.624012	0.519725	0.735164	0.672864	0.633854	0.647136
cg10226855	ACTA2-AS1		TSS1500	0.761738	0.803929	0.797843	0.855498	0.799187	0.826176	0.76522	0.839145	0.806092	0.846157	0.807269	0.842148	0.896536	0.680935	0.848824	0.83885	0.810659	0.821422
	ACTA2-AS1											0.730341									0.745211
cg02356111	ACTB	Island	TSS200	0.0177652	0.0157102	0.0172501	0.0154293	0.0230048	0.0189696	0.0140883	0.0161271	0.0172931	0.0187317	0.0154416	0.0162718	0.00105518	0.0236207	0.0157756	0.0127439	0.0164343	0.0150093
cg04490349	ACTB	S_Shore	TSS1500	0.281087	0.29372	0.241227	0.358175	0.237088	0.515895	0.226821	0.234676	0.298586	0.48846	0.52034	0.422797	0.433624	0.336894	0.392179	0.21913	0.36593	0.397419
cg07476653	ACTB	Island	TSS200	0.02457	0.0241495	0.0234189	0.0265947	0.0257843	0.0244048	0.0218025	0.0249013	0.0244532	0.0221608	0.0248788	0.0241907	0.0254384	0.027656	0.0211641	0.0177175	0.0237846	0.0233739
cg09041756	ACTB	Island	TSS200	0.0284776	0.0270525	0.0220393	0.0322758	0.0276068	0.0236466	0.02534	0.0235538	0.0262491	0.0248349	0.0307573	0.0233444	0.0267548	0.0395244	0.0274361	0.0173274	0.0240191	0.0267498
cg13677897	ACTB	Island	TSS1500	0.0677595	0.0553874	0.0544529	0.0740328	0.0578551	0.0574033	0.0657428	0.0425292	0.0593954	0.107746	0.0433498	0.0607207	0.0919209	0.0861004	0.0724526	0.0672256	0.0500792	0.0724494
cg15380173	ACTB	S_Shore	TSS1500	0.234481	0.347879	0.19522	0.366708	0.32684	0.498222	0.217682	0.270462	0.307187	0.498711	0.471221	0.381543	0.495277	0.303121	0.312541	0.162213	0.334932	0.369945
cg19806676	ACTB	S_Shore	TSS1500	0.0496633	0.0297118	0.0441626	0.0521783	0.0461778	0.0455638	0.0365351	0.0280381	0.0415038	0.0681093	0.0327007	0.0578212	0.0682617	0.0614875	0.0401468	0.0347119	0.0369996	0.0500298
cg21189070	ACTB	Island	TSS1500	0.0350187	0.0274934	0.0255841	0.0274014	0.0247704	0.0262181	0.0195157	0.0204919	0.0258117	0.0162636	0.0219528	0.0252464	0.0182886	0.0244796	0.0280121	0.0200976	0.0276424	0.0227479
cg23162587	ACTB	Island	TSS1500	0.0123409	0.0172786	0.0205859	0.022473	0.0167695	0.0132783	0.0124977	0.016212	0.0164295	0.0153142	0.0161594	0.016705	0.0296006	0.0198601	0.0147789	0.0135103	0.0144394	0.017546
cg23261233	ACTB	Island	TSS1500	0.0207294	0.0242621	0.0206405	0.0270465	0.0246922	0.0259089	0.0209576	0.0269042	0.0238927	0.035934	0.0206784	0.0217969	0.0467775	0.0329002	0.022608	0.0193457	0.0196188	0.0274574
	ACTB											0.0840801									0.102273
cg05301052	ACTBL2		TSS200	0.831016	0.893073	0.772881	0.836873	0.884435	0.927147	0.849363	0.848862	0.855456	0.827746	0.914731	0.82662	0.817048	0.864686	0.674135	0.924563	0.878628	0.84102
cg05303982	ACTBL2		TSS200	0.85301	0.88645	0.758539	0.755721	0.903704	0.764657	0.753325	0.813886	0.811161	0.613725	0.720479	0.728267	0.42923	0.771404	0.544901	0.87886	0.748816	0.67946
cg06160643	ACTBL2		TSS1500	0.658104	0.732041	0.636032	0.763874	0.789323	0.650364	0.635925	0.701117	0.695848	0.556236	0.946013	0.634642	0.645261	0.701542	0.671472	0.767881	0.74087	0.70799
cg09928596	ACTBL2		TSS1500	0.772977	0.879217	0.695913	0.842525	0.825937	0.71596	0.734534	0.800307	0.783421	0.724971	0.932197	0.805408	0.606456	0.768067	0.49002	0.859342	0.852316	0.754847
cg11271345	ACTBL2		TSS1500	0.878554	0.865556	0.869461	0.897895	0.892199	0.884534	0.884165	0.870899	0.880408	0.867226	0.859841	0.859344	0.841909	0.906149	0.865261	0.900351	0.878887	0.872371
cg20772593	ACTBL2		TSS200	0.777124	0.878603	0.745059	0.785291	0.82701	0.707151	0.683442	0.779762	0.77293	0.726277	0.796638	0.742646	0.559255	0.787159	0.480832	0.721525	0.767491	0.697728
cg26657920	ACTBL2		TSS1500	0.872752	0.892249	0.830467	0.90562	0.86976	0.895513	0.777427	0.888339	0.866516	0.673728	0.822838	0.729334	0.714013	0.857602	0.486725	0.924698	0.843924	0.756608
cg26768399	ACTBL2		TSS1500	0.874059	0.902644	0.878982	0.909694	0.898069	0.868026	0.912176	0.865966	0.888702	0.888255	0.875283	0.869213	0.870977	0.893832	0.870272	0.920919	0.889494	0.884781
	ACTBL2											0.819305									0.77435
cg06048973	ACTC1		TSS200	0.672576	0.785736	0.661017	0.771422	0.813293	0.824861	0.68406	0.738735	0.743962	0.779743	0.810635	0.732433	0.749824	0.746448	0.706378	0.779756	0.747587	0.756601
cg08190298	ACTC1		TSS1500	0.557549	0.603832	0.503819	0.555321	0.561491	0.741373	0.517557	0.617308	0.582281	0.740989	0.733895	0.574508	0.531219	0.647727	0.588899	0.660973	0.652029	0.64128
cg01369328	ACTG1	Island	TSS200	0.0138877	0.0186368	0.0186091	0.0184795	0.020968	0.0187708	0.0132949	0.0192321	0.0177349	0.0160841	0.0158806	0.0171601	0.0203747	0.0228979	0.0178283	0.015839	0.0199117	0.018247
cg01881939	ACTG1	Island	TSS1500	0.0117023	0.0157267	0.0132847	0.0142857	0.0119716	0.012594	0.0152288	0.0134318	0.0135282	0.0119893	0.0116114	0.0117758	0.0166038	0.021442	0.0147355	0.0107632	0.014036	0.0141196
cg05036147	ACTG1	Island	TSS200	0.0615904	0.0877653	0.0533625	0.0606631	0.0606574	0.0427767	0.0831723	0.0403638	0.0612939	0.130896	0.0382021	0.0467454	0.137836	0.111628	0.0543214	0.0601145	0.0390155	0.0773449
cg05050789	ACTG1	Island	TSS1500	0.0216466	0.0241863	0.0255886	0.026084	0.0251884	0.0210944	0.0185148	0.0211314	0.0229293	0.018077	0.0244774	0.0242389	0.025795	0.0273515	0.0259742	0.018143	0.0239502	0.0235009
cg05488523	ACTG1	Island	TSS1500	0.0270266	0.0312892	0.0286343	0.0358272	0.0324275	0.0307146	0.0252231	0.0280311	0.0298967	0.0239353	0.0284302	0.0314683	0.033618	0.0400639	0.0402277	0.0240522	0.028293	0.0312611
cg10325670	ACTG1	Island	TSS200;TSS200;TSS200	0.0337335	0.0255144	0.0285075	0.0325837	0.0335155	0.038646	0.0253635	0.0270742	0.0306173	0.0176475	0.0334292	0.0292945	0.0286515	0.0327449	0.0351351	0.0287062	0.0293072	0.0293645
cg10607155	ACTG1	Island	TSS1500	0.0186666	0.0203014	0.021745	0.0250429	0.0311984	0.0153521	0.0172076	0.0183322	0.0209808	0.0152732	0.0192907	0.0197818	0.019233	0.0334344	0.0226074	0.0154457	0.0196265	0.0205866
cg12475128	ACTG1	Island	TSS200	0.0290957	0.021792	0.0236154	0.0280533	0.0281326	0.0313018	0.0242141	0.0244492	0.0263318	0.0208175	0.0286041	0.0270805	0.0225966	0.0282377	0.0268271	0.0267028	0.0249986	0.0257331
cg19415364	ACTG1	Island	TSS200	0.221721	0.154057	0.160706	0.189518	0.210568	0.244853	0.218135	0.121464	0.190128	0.173491	0.143954	0.165512	0.277539	0.248099	0.197093	0.175859	0.139279	0.190103
cg19517525	ACTG1	Island	TSS1500	0.0347405	0.0296702	0.02542	0.034562	0.0234083	0.0190497	0.0267595	0.0229337	0.027068	0.031102	0.0209497	0.0204258	0.0198934	0.0412332	0.0301649	0.0223744	0.0247149	0.0263573
cg20335959	ACTG1	Island	TSS1500	0.104781	0.0688317	0.076982	0.0997515	0.0845929	0.0909033	0.0925578	0.0564437	0.0843555	0.107595	0.0600807	0.0932404	0.124627	0.0869504	0.0924077	0.069607	0.067585	0.0877616
cg23473045	ACTG1	Island	TSS200	0.0258286	0.0251349	0.0364244	0.02821	0.0411416	0.0376067	0.0249675	0.0375965	0.0321138	0.036481	0.0271709	0.0337432	0.0319151	0.0281026	0.0430393	0.0270635	0.0341288	0.0327055
cg27350783	ACTG1	Island	TSS200	0.05246	0.0352185	0.0353143	0.0365481	0.049066	0.0532462	0.0227979	0.0358668	0.0400647	0.0283594	0.032438	0.0407666	0.0449701	0.0458213	0.0719473	0.0391904	0.0393242	0.0428522
	ACTG1											0.128219									0.134521
cg02274550	ACTG2		TSS200	0.329471	0.448658	0.432351	0.435124	0.450859	0.465277	0.339787	0.436979	0.417313	0.666471	0.536764	0.405943	0.426455	0.386117	0.542972	0.325284	0.412476	0.46281
cg04725937	ACTG2		TSS1500;TSS1500	0.57291	0.664704	0.59274	0.63612	0.630599	0.762396	0.592894	0.677207	0.641196	0.801164	0.728666	0.685519	0.838168	0.573469	0.725285	0.668922	0.645304	0.708312
cg05313680	ACTG2		TSS1500;TSS1500	0.44493	0.519479	0.537566	0.539166	0.466903	0.635797	0.463997	0.5621	0.521242	0.682197	0.561523	0.452335	0.640693	0.473802	0.569061	0.463494	0.49542	0.542316
cg12789718	ACTG2		TSS1500;TSS1500	0.852411	0.901444	0.80559	0.857284	0.879949	0.855041	0.818362	0.880731	0.856352	0.860007	0.888734	0.826833	0.870546	0.835159	0.834322	0.896303	0.869157	0.860133
cg15762063	ACTG2		TSS200;TSS200	0.479796	0.617316	0.660056	0.588005	0.502662	0.736968	0.497473	0.652856	0.591892	0.751609	0.672548	0.650268	0.76661	0.475396	0.679963	0.499876	0.602751	0.637378
cg22574280	ACTG2		TSS1500;TSS1500	0.539279	0.620459	0.617985	0.620662	0.585684	0.768856	0.534366	0.668356	0.619456	0.730575	0.678344	0.579881	0.812646	0.529905	0.68338	0.615678	0.655736	0.660768
cg23557788	ACTG2		TSS1500	0.860733	0.839745	0.742993	0.828486	0.888893	0.901295	0.879629	0.750834	0.836576	0.899154	0.812934	0.806529	0.882162	0.898573	0.823191	0.865336	0.79316	0.84763
cg24691835	ACTG2		TSS1500	0.491467	0.539259	0.584223	0.580228	0.517364	0.671255	0.521095	0.578073	0.56037	0.661466	0.591193	0.529155	0.686539	0.5108	0.612321	0.52202	0.552215	0.583214
	ACTG2											0.63055									0.66282
cg03839554	ACTL6A	N_Shore	TSS1500;TSS1500;TSS1500	0.0934829	0.159211	0.169868	0.188048	0.217125	0.158605	0.268396	0.139612	0.174293	0.282189	0.234837	0.285342	0.161134	0.13593	0.115221	0.167927	0.153705	0.192036
cg04903136	ACTL6A	N_Shore	TSS1500;TSS1500;TSS1500	0.819083	0.811025	0.731206	0.765434	0.641308	0.823434	0.735376	0.685465	0.751541	0.823089	0.696809	0.670108	0.565484	0.710692	0.665075	0.836118	0.69224	0.707452
cg07261848	ACTL6A	Island	TSS1500;TSS1500;TSS1500	0.2332	0.09049	0.10696	0.132097	0.131904	0.217249	0.153631	0.152256	0.152223	0.0622559	0.201794	0.131866	0.0736536	0.114021	0.153772	0.150075	0.0928583	0.122537
cg10112003	ACTL6A	Island	TSS200;TSS200;TSS200	0.0610781	0.0623226	0.0407313	0.0511223	0.032839	0.0361036	0.050677	0.028518	0.045424	0.177357	0.0247521	0.0318915	0.126906	0.0861115	0.0473245	0.0253449	0.0378732	0.0696951
cg15278957	ACTL6A	N_Shore	TSS1500;TSS1500;TSS1500	0.928197	0.89889	0.876751	0.904342	0.907682	0.919925	0.932888	0.833146	0.900228	0.712459	0.847513	0.8588	0.893391	0.890836	0.869514	0.9066	0.861747	0.855108
cg22619386	ACTL6A	Island	TSS200;TSS200;TSS200	0.0607381	0.0568899	0.0717959	0.0478799	0.0563882	0.0589755	0.0514962	0.0363961	0.05507	0.130545	0.0342745	0.0522107	0.124894	0.093342	0.0498054	0.0489434	0.0394321	0.0716809
cg23688880	ACTL6A	N_Shore	TSS1500;TSS1500;TSS1500	0.522017	0.646219	0.406939	0.542282	0.470694	0.362915	0.350106	0.301712	0.45036	0.144699	0.488317	0.381528	0.216137	0.491485	0.260026	0.316751	0.413315	0.339032
cg25198545	ACTL6A	Island	TSS200;TSS200;TSS200	0.0750235	0.110097	0.0645242	0.0700337	0.0824197	0.0688384	0.0782743	0.0423162	0.0739409	0.228513	0.0467269	0.0642258	0.175576	0.159338	0.0666953	0.0601666	0.0631109	0.108044
	ACTL6A											0.325385									0.308198
cg00477225	ACTL6B	S_Shore	TSS200	0.233391	0.242475	0.290096	0.32899	0.368133	0.655162	0.300574	0.287866	0.338336	0.620906	0.617749	0.257138	0.4567	0.302294	0.319178	0.180079	0.308998	0.38288
cg00641685	ACTL6B	S_Shore	TSS1500	0.784234	0.776258	0.750993	0.761343	0.762658	0.830185	0.799198	0.824751	0.786203	0.681937	0.667068	0.683573	0.73659	0.746778	0.709025	0.777006	0.847672	0.731206
cg05729836	ACTL6B	S_Shore	TSS1500	0.776741	0.905283	0.717031	0.798306	0.734125	0.867429	0.788872	0.741055	0.791105	0.884346	0.817762	0.556007	0.730081	0.822093	0.578601	0.689379	0.79645	0.73434
cg14088161	ACTL6B	S_Shore	TSS1500	0.574107	0.684805	0.629912	0.592543	0.664705	0.799488	0.625352	0.725602	0.662064	0.747037	0.63889	0.52782	0.489719	0.584727	0.457323	0.695632	0.640072	0.597653
cg16024950	ACTL6B	Island	TSS200	0.107448	0.196666	0.231296	0.169976	0.256621	0.649473	0.115967	0.155334	0.235348	0.21607	0.0857016	0.125564	0.271794	0.244248	0.0909122	0.059011	0.144498	0.154725
cg17592984	ACTL6B	Island	TSS200	0.0606985	0.0611088	0.0948711	0.0633653	0.0990859	0.635283	0.0601157	0.0447118	0.139905	0.0261831	0.0361328	0.0410985	0.0602353	0.0991936	0.0479142	0.0317465	0.0503567	0.0491076
	ACTL6B											0.49216									0.441652
cg00065385	ACTL7A		TSS1500	0.955569	0.96786	0.936435	0.948022	0.955295	0.956898	0.9604	0.957219	0.954712	0.954176	0.956624	0.949026	0.962902	0.95035	0.953797	0.964404	0.959571	0.956356
cg02594615	ACTL7A		TSS1500	0.931384	0.939827	0.905327	0.878008	0.935702	0.954048	0.952395	0.947282	0.930497	0.953253	0.951215	0.928804	0.94681	0.896004	0.899215	0.953794	0.953456	0.935319
cg05235844	ACTL7A		TSS1500	0.834373	0.93678	0.926756	0.912652	0.941621	0.953457	0.805242	0.950138	0.907627	0.915163	0.776349	0.941701	0.914183	0.934061	0.923067	0.933802	0.826755	0.895635
cg05855741	ACTL7A		TSS200	0.860203	0.887831	0.859234	0.896967	0.877036	0.883748	0.842692	0.816073	0.865473	0.627392	0.841666	0.851241	0.819399	0.901918	0.88544	0.888928	0.864275	0.835032
cg22482658	ACTL7A		TSS200	0.898041	0.923331	0.903666	0.906541	0.896483	0.874291	0.908173	0.88945	0.899997	0.878658	0.898599	0.893033	0.85484	0.904943	0.906085	0.917299	0.899722	0.894147
	ACTL7A											0.911661									0.903298
cg00605182	ACTL7B	S_Shore	TSS1500	0.763219	0.846977	0.746181	0.776739	0.747436	0.785146	0.781766	0.783065	0.778816	0.854705	0.819243	0.656011	0.752188	0.820316	0.610645	0.778	0.849849	0.76762
cg03198756	ACTL7B	S_Shore	TSS1500	0.700258	0.800341	0.715248	0.821384	0.760273	0.758451	0.743477	0.777075	0.759563	0.762307	0.781491	0.587172	0.609016	0.710019	0.506238	0.711743	0.779681	0.680958
cg03860650	ACTL7B	S_Shore	TSS200	0.904059	0.944465	0.859494	0.903838	0.906063	0.920239	0.906778	0.938592	0.910441	0.914702	0.931727	0.886683	0.92791	0.904361	0.829943	0.895348	0.922058	0.901591
cg14832363	ACTL7B	S_Shore	TSS200	0.664455	0.654005	0.641233	0.739636	0.638612	0.84621	0.637303	0.638427	0.682485	0.655079	0.703947	0.603756	0.625497	0.69397	0.602587	0.788957	0.655217	0.666126
cg19863405	ACTL7B	S_Shore	TSS1500	0.898895	0.935895	0.886934	0.899667	0.854949	0.910012	0.91353	0.902755	0.90033	0.850541	0.900071	0.882942	0.85857	0.824846	0.670067	0.870078	0.887255	0.843046
	ACTL7B											0.806327									0.771868
cg05011451	ACTL8		TSS1500	0.847728	0.811838	0.848023	0.867846	0.895985	0.927103	0.899712	0.862148	0.870048	0.916798	0.886415	0.79256	0.917763	0.851073	0.855639	0.905578	0.871093	0.874615
cg06687562	ACTL8		TSS200	0.045284	0.16054	0.0706461	0.0517928	0.0726245	0.0471756	0.0524571	0.0429076	0.0679285	0.0880608	0.0496307	0.046851	0.0620437	0.0500586	0.0523847	0.0421667	0.0494379	0.0550793
cg08180188	ACTL8		TSS200	0.237639	0.315109	0.348147	0.300495	0.414625	0.237031	0.309082	0.208927	0.296382	0.221578	0.25653	0.205376	0.143161	0.34136	0.252689	0.471611	0.211459	0.26297
cg09941542	ACTL8		TSS1500	0.698444	0.781408	0.811302	0.777387	0.687175	0.886714	0.871567	0.783199	0.787149	0.870538	0.838904	0.833037	0.815689	0.701122	0.760345	0.804283	0.808943	0.804108
cg17572348	ACTL8		TSS200	0.858882	0.884841	0.851989	0.853634	0.884971	0.861885	0.858591	0.841472	0.862033	0.838299	0.819547	0.852664	0.791017	0.880843	0.860419	0.87912	0.857869	0.847472
cg26170654	ACTL8		TSS200	0.102132	0.117972	0.0641417	0.11569	0.13727	0.0565486	0.0404001	0.0472803	0.0851793	0.0871117	0.0484094	0.0547031	0.0613697	0.0966153	0.0639601	0.119653	0.057065	0.0736109
	ACTL8											0.494787									0.486309
cg01621764	ACTL9	S_Shore	TSS200	0.473094	0.477732	0.615355	0.539062	0.438671	0.652734	0.479436	0.458529	0.516827	0.630478	0.685921	0.412441	0.579456	0.50764	0.463098	0.617521	0.427801	0.540544
cg02339243	ACTL9	S_Shore	TSS1500	0.698084	0.768235	0.682227	0.742586	0.704985	0.460182	0.760191	0.778703	0.699399	0.536422	0.562883	0.518111	0.612402	0.572363	0.532149	0.638456	0.61191	0.573087
cg04634756	ACTL9	S_Shore	TSS200	0.798313	0.832163	0.822485	0.85259	0.895306	0.879775	0.864387	0.842804	0.848478	0.865018	0.87376	0.764931	0.775959	0.797244	0.778917	0.843208	0.847264	0.818288
cg12148774	ACTL9	S_Shore	TSS1500	0.872388	0.928461	0.8527	0.860393	0.881021	0.71305	0.903719	0.769558	0.847661	0.70607	0.853133	0.80687	0.86603	0.873147	0.626817	0.906601	0.808275	0.805868
cg18931750	ACTL9	S_Shore	TSS200	0.893905	0.930333	0.905468	0.917304	0.879578	0.932023	0.906888	0.935696	0.912649	0.925589	0.927067	0.8933	0.926141	0.908489	0.878418	0.925978	0.913159	0.912268
cg19611002	ACTL9	S_Shore	TSS1500	0.722	0.710637	0.703651	0.668428	0.691011	0.445873	0.772139	0.656799	0.671317	0.423946	0.602551	0.53444	0.503425	0.722315	0.506469	0.642171	0.620798	0.569514
cg20074214	ACTL9	S_Shore	TSS200	0.597272	0.484939	0.618423	0.591222	0.559347	0.689427	0.585772	0.566776	0.586647	0.734956	0.781893	0.465002	0.622569	0.648871	0.47207	0.652282	0.623797	0.62518
cg26308133	ACTL9	S_Shore	TSS200	0.88532	0.915435	0.855066	0.932611	0.905841	0.90599	0.905055	0.913013	0.902291	0.884599	0.903567	0.832426	0.866023	0.873131	0.8378	0.927948	0.838636	0.870516
	ACTL9											0.748159									0.714408
cg00841968	ACTN1	Island	TSS1500;TSS1500;TSS1500	0.0928993	0.031267	0.047655	0.0643061	0.0485868	0.02097	0.0451348	0.0270876	0.0472383	0.0186941	0.023163	0.0203954	0.0237777	0.0391522	0.0388461	0.0191259	0.0309818	0.026767
cg01472979	ACTN1	Island	TSS200;TSS200;TSS200;TSS200	0.0245634	0.0269299	0.0313981	0.0253805	0.0322017	0.0231906	0.0213335	0.0247758	0.0262217	0.018619	0.0269742	0.0242867	0.0306521	0.0297482	0.0295043	0.0223744	0.0237501	0.0257386
cg02310358	ACTN1	S_Shore	TSS1500;TSS1500;TSS1500;Body	0.180355	0.175696	0.291341	0.232417	0.313152	0.11343	0.240853	0.241668	0.223614	0.10672	0.144183	0.265005	0.119578	0.189197	0.190358	0.123307	0.199523	0.167234
cg04425263	ACTN1	S_Shore	TSS1500;TSS1500;TSS1500;Body	0.277474	0.290546	0.420281	0.253175	0.37194	0.118956	0.358072	0.290459	0.297613	0.250666	0.199401	0.310961	0.0917685	0.255486	0.247903	0.211439	0.268574	0.229525
cg06268174	ACTN1	Island	TSS200;TSS200;TSS200;TSS200	0.0107308	0.0141759	0.0135345	0.0131405	0.0298284	0.012674	0.00995645	0.0139557	0.0147495	0.0126585	0.0119768	0.0125351	0.0154697	0.0178116	0.0113162	0.0097392	0.0122015	0.0129636
cg06693368	ACTN1	Island	TSS200;TSS200;TSS200;TSS200	0.0116779	0.0148581	0.0139955	0.0173449	0.0346703	0.0107994	0.0106994	0.0154804	0.0161907	0.0132611	0.0149155	0.0138502	0.0143975	0.0200602	0.0148285	0.0104022	0.0133822	0.0143872
cg13009711	ACTN1	Island	TSS200;TSS200;TSS200	0.0288259	0.0319955	0.0385046	0.0321091	0.043964	0.0278152	0.0222885	0.0292309	0.0318417	0.0234719	0.0341042	0.0282652	0.0258373	0.0417535	0.0343267	0.0236891	0.0282609	0.0299636
cg14122300	ACTN1	Island	TSS1500;TSS1500;TSS1500	0.0873061	0.055133	0.0800776	0.0774116	0.0635917	0.0710264	0.0893887	0.0457365	0.0712089	0.0954786	0.0472605	0.0620621	0.081177	0.0903823	0.0713531	0.0620197	0.0545806	0.0705392
cg21466187	ACTN1	Island	TSS1500;TSS1500;TSS1500;Body	0.0106408	0.0157884	0.0212283	0.0139678	0.0183228	0.0123593	0.0134138	0.0152979	0.0151274	0.0108078	0.0137706	0.0143993	0.0135787	0.0170534	0.0127477	0.00774387	0.0133727	0.0129343
	ACTN1											0.082645									0.0655614
cg25605947	ACTN1-AS1	Island	TSS200;TSS1500;TSS1500;TSS1500	0.0159504	0.0254384	0.033911	0.0308524	0.029229	0.0310489	0.0217099	0.0214256	0.0261957	0.0304235	0.0395897	0.0199945	0.0227297	0.0345946	0.0187317	0.0262339	0.0205976	0.0266119
	ACTN1-AS1											0.0261957									0.0266119
cg06177278	ACTN2	N_Shore	TSS1500	0.26809	0.218706	0.396798	0.340881	0.338038	0.415935	0.38524	0.240072	0.32547	0.270103	0.538166	0.178257	0.210404	0.359974	0.221515	0.496224	0.210923	0.310696
cg06968741	ACTN2	N_Shore	TSS1500	0.670815	0.685694	0.725784	0.705079	0.750025	0.759065	0.741382	0.76127	0.724889	0.751267	0.767029	0.55038	0.610734	0.737427	0.574915	0.795838	0.628102	0.676961
cg10014470	ACTN2	N_Shore	TSS1500	0.865669	0.5937	0.761088	0.785123	0.843731	0.913561	0.922603	0.765764	0.806405	0.944467	0.831257	0.544107	0.835014	0.808259	0.632946	0.951684	0.600587	0.76854
cg10372476	ACTN2	Island	TSS1500	0.183335	0.141897	0.177159	0.247472	0.247009	0.856317	0.180706	0.206275	0.280021	0.788206	0.529755	0.35309	0.216133	0.229282	0.577083	0.582936	0.130629	0.425889
cg14932016	ACTN2	Island	TSS200	0.0480036	0.0607724	0.0814994	0.0741362	0.0966491	0.592176	0.113695	0.0584823	0.140677	0.499943	0.392911	0.221216	0.305749	0.20353	0.487957	0.48165	0.0895918	0.335318
cg15109151	ACTN2	N_Shore	TSS1500	0.868082	0.879111	0.86983	0.864421	0.88282	0.833816	0.870097	0.883685	0.868983	0.905941	0.891151	0.756487	0.851996	0.865173	0.698725	0.896759	0.810056	0.834536
cg16853982	ACTN2	N_Shore	TSS1500	0.368142	0.507062	0.38845	0.402111	0.448956	0.567564	0.385816	0.403095	0.433899	0.515424	0.442811	0.39324	0.462085	0.384254	0.476889	0.421355	0.37194	0.4335
cg19140682	ACTN2	Island	TSS200;TSS200;TSS200	0.0199677	0.0277648	0.0328076	0.0248002	0.0377171	0.602843	0.0258049	0.0398727	0.101447	0.398582	0.356629	0.184126	0.224345	0.134824	0.585049	0.534992	0.0409686	0.307439
	ACTN2											0.460224									0.51161
cg01806972	ACTN3	Island	TSS200;TSS1500	0.0451351	0.158213	0.100499	0.193145	0.13231	0.537003	0.0626166	0.0794221	0.163543	0.402181	0.444398	0.0654787	0.357563	0.230088	0.0917114	0.383596	0.0768391	0.256482
cg07039611	ACTN3	S_Shore	1stExon;TSS1500;TSS200;TSS200	0.240843	0.332356	0.185567	0.268177	0.272108	0.279329	0.154772	0.205319	0.242309	0.191409	0.329922	0.16416	0.357179	0.251492	0.133474	0.288212	0.186005	0.237732
cg10523820	ACTN3	Island	TSS200;TSS1500	0.0687024	0.116014	0.0735	0.0886969	0.125977	0.178381	0.0424519	0.0806622	0.0967982	0.182199	0.338075	0.0536684	0.339973	0.145035	0.0597299	0.384511	0.0852099	0.19855
cg18862171	ACTN3	Island	TSS200;TSS1500	0.165694	0.239491	0.189991	0.214191	0.194971	0.410456	0.205701	0.167738	0.223529	0.387273	0.425306	0.143205	0.381489	0.249142	0.168197	0.322208	0.207414	0.285529
cg20608119	ACTN3	Island	TSS200;TSS1500	0.040545	0.0815162	0.059356	0.0771826	0.0642796	0.290707	0.0698657	0.0315506	0.0893753	0.169819	0.205949	0.0476616	0.199649	0.108053	0.0697489	0.103754	0.0569634	0.1202
cg21252088	ACTN3	Island	1stExon;TSS1500;TSS200;TSS200	0.0794359	0.0955711	0.0466051	0.0795418	0.0750898	0.138298	0.046677	0.0505477	0.0764708	0.152434	0.308535	0.0514701	0.289118	0.0991881	0.0579947	0.223722	0.0456466	0.153514
cg24912904	ACTN3	Island	TSS200;TSS1500	0.0255049	0.0773914	0.0280057	0.037272	0.037939	0.0605598	0.0315692	0.039813	0.0422569	0.0536657	0.267721	0.0311767	0.218866	0.0678242	0.0323383	0.231858	0.0264556	0.116238
	ACTN3											0.133469									0.195463
cg00524169	ACTN4	Island	TSS1500	0.0488291	0.0758443	0.0531349	0.0572664	0.0600239	0.0442097	0.0586242	0.0603742	0.0572883	0.0649543	0.0601032	0.0569604	0.0620512	0.0738192	0.0535164	0.056202	0.0488998	0.0595633
cg03144206	ACTN4	N_Shore	TSS1500	0.0482537	0.0350656	0.0371514	0.0488127	0.0490748	0.0344342	0.0434821	0.0294752	0.0407187	0.0772223	0.0329777	0.0312931	0.0495844	0.0532477	0.0405957	0.0371772	0.0360092	0.0447634
cg05231821	ACTN4	Island	TSS200	0.0372633	0.0349661	0.0303195	0.033052	0.0328365	0.0306277	0.0285154	0.029705	0.0321607	0.0344035	0.0320811	0.0324021	0.0286285	0.038138	0.0336485	0.0285899	0.0288555	0.0320934
cg09432528	ACTN4	Island	TSS200	0.205092	0.257937	0.0879048	0.0959415	0.0806776	0.0958664	0.123365	0.0866621	0.129181	0.107891	0.113494	0.109568	0.142452	0.200794	0.076731	0.147167	0.0857287	0.122978
cg12955895	ACTN4	Island	TSS200	0.0612114	0.0439574	0.0436247	0.0508122	0.0505195	0.0465599	0.0391414	0.0394174	0.0469055	0.0403628	0.0555713	0.044042	0.0434439	0.0652045	0.0526888	0.0539807	0.0451259	0.0500525
cg13711528	ACTN4	Island	TSS200	0.0620549	0.0432297	0.0516275	0.0532667	0.0647404	0.0886093	0.0649578	0.042768	0.0589068	0.0491767	0.0908764	0.0453946	0.144435	0.0513302	0.079672	0.0791382	0.055962	0.0744981
cg17055304	ACTN4	N_Shore	TSS1500	0.0413575	0.0438221	0.0488754	0.0347806	0.0385791	0.0384193	0.0461396	0.044522	0.042062	0.0532609	0.04915	0.0448907	0.0466947	0.0535805	0.0329543	0.0260307	0.0344668	0.0426286
cg19109955	ACTN4	Island	TSS200	0.0159044	0.0238187	0.0180862	0.0196832	0.0194881	0.0222116	0.0159731	0.0163938	0.0189449	0.0243884	0.0160991	0.0162658	0.0289248	0.0362881	0.0187408	0.0127481	0.0177449	0.0214
cg20578018	ACTN4	N_Shore	TSS1500	0.0545936	0.033037	0.0493046	0.0356063	0.029025	0.0371088	0.0401675	0.0287371	0.0384475	0.0409729	0.0219343	0.0419048	0.035707	0.047851	0.0424841	0.0339601	0.0281598	0.0366218
cg24224907	ACTN4	Island	TSS200	0.0119042	0.0133166	0.0119989	0.0160265	0.0142773	0.0109554	0.011078	0.0120483	0.0127007	0.0172117	0.0131211	0.0153523	0.0185755	0.0237127	0.01313	0.00942722	0.0117651	0.015287
	ACTN4											0.0477316									0.0499886
cg02259743	ACTR10	N_Shore	TSS1500	0.0687183	0.0642215	0.0492024	0.0579431	0.0710644	0.0535184	0.0517986	0.0655475	0.0602518	0.105062	0.0564113	0.0544011	0.0530591	0.0658379	0.0615719	0.0559329	0.047187	0.0624329
cg06335773	ACTR10	Island	TSS1500	0.0222294	0.0267755	0.0251571	0.0313716	0.0208336	0.0283371	0.0376417	0.0207458	0.0266365	0.0935917	0.0203296	0.0212465	0.0312104	0.0364684	0.0266778	0.0151014	0.0254069	0.0337541
cg08825816	ACTR10	Island	TSS200	0.0972464	0.0943591	0.0824504	0.0970758	0.0801961	0.104079	0.0986798	0.0660026	0.0900111	0.145969	0.0592028	0.0606163	0.119513	0.120955	0.0626248	0.0787547	0.0762023	0.0904797
cg10739033	ACTR10	N_Shore	TSS1500	0.0156849	0.0274948	0.0226222	0.0241109	0.0235216	0.0261314	0.016862	0.0154231	0.0214814	0.0357211	0.0162239	0.0215998	0.0251935	0.0398444	0.0193349	0.0135856	0.0168527	0.0235445
cg12085852	ACTR10	N_Shore	TSS1500	0.162481	0.178036	0.139386	0.106731	0.0877741	0.176642	0.16965	0.134844	0.144443	0.352972	0.173259	0.159109	0.195477	0.193709	0.121973	0.217587	0.117515	0.19145
cg24775108	ACTR10	Island	TSS1500	0.0172808	0.0145763	0.0154188	0.0149454	0.0147401	0.0144981	0.0134243	0.0151318	0.015002	0.0120723	0.0149464	0.0161774	0.0148432	0.0195819	0.0159643	0.012108	0.0169615	0.0153319
cg25347504	ACTR10	Island	TSS200	0.0606514	0.0587986	0.0408569	0.0588514	0.0415931	0.0241491	0.0394014	0.0311186	0.0444276	0.0835881	0.0523171	0.0493673	0.0912098	0.110279	0.048685	0.0160771	0.0453767	0.0621125
cg26582229	ACTR10	Island	TSS200	0.0134768	0.0257742	0.0163145	0.0191087	0.0229993	0.0333204	0.0159324	0.0171621	0.0205111	0.0167099	0.0201479	0.0193502	0.0254751	0.0448866	0.0236388	0.011967	0.02022	0.0227994
cg27348777	ACTR10	Island	TSS200	0.0156139	0.0294643	0.0115641	0.0177096	0.0128594	0.0128342	0.0123093	0.0134982	0.0157316	0.0320304	0.0156286	0.0143635	0.055724	0.0516682	0.0140454	0.00739206	0.0148473	0.0257124
	ACTR10											0.0487218									0.0586242
cg07466585	ACTR1A	Island	TSS1500;TSS200	0.0240119	0.0448986	0.0518827	0.0653246	0.0426244	0.0525338	0.0546633	0.0306515	0.0458239	0.0530767	0.0265401	0.0459579	0.057911	0.068078	0.0413231	0.0292892	0.0345628	0.0445924
cg09135741	ACTR1A	Island	TSS1500;TSS200	0.0330399	0.0328367	0.0273194	0.043471	0.0348195	0.0339202	0.0351866	0.0356854	0.0345348	0.0588454	0.0290599	0.0299492	0.0474656	0.0549866	0.0356376	0.0254644	0.0338328	0.0394052
cg11453585	ACTR1A	Island	TSS1500;TSS200	0.0628096	0.0504076	0.0425619	0.0487336	0.0541601	0.0719562	0.0408158	0.0447065	0.0520189	0.0669456	0.0453626	0.0473731	0.0484402	0.072164	0.0388595	0.0469311	0.0405657	0.0508302
cg13071996	ACTR1A	S_Shore	TSS1500;TSS200;TSS200	0.0476819	0.035532	0.0441369	0.044322	0.0443112	0.0520801	0.0645889	0.0330864	0.0457174	0.0338229	0.0408051	0.0465546	0.0487752	0.0562464	0.0475822	0.0307026	0.0484876	0.0441221
	ACTR1A											0.0445238									0.0447375
cg03167325	ACTR1B	S_Shore	TSS1500	0.180169	0.301099	0.244899	0.364802	0.343604	0.278028	0.174877	0.210893	0.262296	0.647922	0.124963	0.209979	0.233704	0.245853	0.251168	0.122275	0.219563	0.256928
cg03574736	ACTR1B	Island	TSS200	0.0222616	0.0208614	0.0162615	0.0189447	0.0184347	0.0153503	0.0145946	0.0184359	0.0181431	0.0136452	0.0184768	0.0175303	0.0191611	0.0204593	0.0182061	0.01518	0.0167218	0.0174226
cg03743214	ACTR1B	Island	TSS200	0.0378405	0.0292729	0.0266111	0.0290525	0.0389863	0.0338787	0.0288648	0.0325745	0.0321352	0.0234593	0.0344954	0.0313188	0.0262153	0.0345429	0.0318522	0.0247495	0.02858	0.0294017
cg05184570	ACTR1B	S_Shore	TSS1500	0.681677	0.754685	0.638787	0.809118	0.684549	0.763706	0.638098	0.696558	0.708397	0.843459	0.556593	0.699046	0.526691	0.635958	0.602256	0.671787	0.656203	0.648999
cg06698844	ACTR1B	S_Shore	TSS1500	0.570399	0.621251	0.604461	0.650248	0.637702	0.752952	0.611084	0.644051	0.636519	0.710753	0.469686	0.536001	0.550971	0.602877	0.490798	0.437041	0.544155	0.542785
cg10737766	ACTR1B	Island	TSS200	0.0871787	0.0415532	0.0405429	0.0481638	0.0380589	0.027598	0.0283983	0.0379107	0.0436756	0.0317226	0.0404149	0.0384737	0.045271	0.0776167	0.0462771	0.0252334	0.0378408	0.0428563
cg11522047	ACTR1B	S_Shore	TSS1500	0.931319	0.948072	0.94389	0.945459	0.943468	0.939266	0.948422	0.944637	0.943067	0.908358	0.933499	0.94028	0.913738	0.944105	0.94356	0.947951	0.943269	0.934345
cg13781389	ACTR1B	Island	TSS200	0.0177579	0.0160297	0.0171295	0.0194908	0.0166746	0.0142379	0.0142446	0.0164244	0.0164987	0.016018	0.0183556	0.0172365	0.0180429	0.0191292	0.0192756	0.0151093	0.0166793	0.0174808
cg15317651	ACTR1B	S_Shore	TSS1500	0.20266	0.225696	0.201093	0.237557	0.249737	0.271013	0.245768	0.272055	0.238197	0.42764	0.239714	0.240882	0.221385	0.257726	0.183025	0.149645	0.25831	0.247291
cg17180753	ACTR1B	S_Shore	TSS1500	0.861455	0.87848	0.858222	0.893477	0.866617	0.790783	0.879731	0.858703	0.860934	0.900899	0.866939	0.764479	0.808567	0.852342	0.727502	0.78078	0.818326	0.814979
cg23123262	ACTR1B	Island	TSS200	0.0370552	0.0353554	0.0354562	0.0342935	0.0286778	0.0254747	0.0282201	0.0221552	0.030836	0.0316298	0.0282825	0.0277399	0.032938	0.0440208	0.0344604	0.0177335	0.0229619	0.0299709
cg27141863	ACTR1B	Island	TSS1500	0.0149705	0.0163934	0.014961	0.0157499	0.0169504	0.0152952	0.0123572	0.00419761	0.0138594	0.0116573	0.0171759	0.0157208	0.0175895	0.0190645	0.015816	0.0108411	0.00651235	0.0142972
cg27488206	ACTR1B	Island	TSS1500	0.0635449	0.0634064	0.0378388	0.0521495	0.0477345	0.0493098	0.0537589	0.0324356	0.0500223	0.0941954	0.0371934	0.0521973	0.116479	0.0823164	0.0376006	0.0500645	0.0456233	0.0644587
	ACTR1B											0.296506									0.281632
cg03886129	ACTR2	N_Shore	TSS1500;TSS1500	0.670693	0.748193	0.652237	0.778085	0.694428	0.543952	0.69799	0.685062	0.68383	0.519778	0.470832	0.673096	0.358965	0.764208	0.491843	0.598439	0.647556	0.56559
cg06394476	ACTR2	Island	TSS1500;TSS1500	0.0623953	0.0550198	0.0553116	0.063978	0.0343142	0.0270642	0.048249	0.0365472	0.0478599	0.0257191	0.0417072	0.0491784	0.0295046	0.101468	0.0410653	0.0332293	0.0615402	0.0479265
cg06915722	ACTR2	Island	TSS1500;TSS1500	0.0839235	0.0670494	0.0733917	0.0806048	0.0858463	0.0688984	0.0839726	0.0536678	0.0746693	0.122398	0.0512067	0.0733445	0.0890095	0.10587	0.0741629	0.0540451	0.0631605	0.0791496
cg11094939	ACTR2	N_Shore	TSS1500;TSS1500	0.0256649	0.0275045	0.0253742	0.0294102	0.0295653	0.0239057	0.0261146	0.0262286	0.026721	0.0221447	0.023104	0.0287631	0.0354426	0.0413206	0.0288905	0.0153601	0.023724	0.0273437
cg11585425	ACTR2	N_Shore	TSS1500;TSS1500	0.0297184	0.0271175	0.0348845	0.0299037	0.0238907	0.0222069	0.0329713	0.0210859	0.0277224	0.0575592	0.0214309	0.0210453	0.0586062	0.0373998	0.0225419	0.0254075	0.0238365	0.0334784
cg15811753	ACTR2	Island	TSS200;TSS200	0.0234056	0.0228667	0.021155	0.0258134	0.0261123	0.0185346	0.022838	0.0205971	0.0226653	0.0176826	0.0210388	0.021326	0.0221932	0.0336416	0.0213066	0.0203237	0.0216552	0.022396
cg16465560	ACTR2	Island	TSS200;TSS200	0.0323498	0.0292258	0.029513	0.0268785	0.0227185	0.0269818	0.0247109	0.0208743	0.0266566	0.0863943	0.0170283	0.0225804	0.0568185	0.0416429	0.0263446	0.0201927	0.0263413	0.0371679
cg21261105	ACTR2	Island	TSS200;TSS200	0.0253744	0.03149	0.0354445	0.0428271	0.0268175	0.0300875	0.0255184	0.0318451	0.0311756	0.118042	0.019225	0.0292471	0.076979	0.0808885	0.0311251	0.0215741	0.0301245	0.0509007
cg23158051	ACTR2	Island	TSS200;TSS200	0.00935827	0.013021	0.0112339	0.0116408	0.0114784	0.0118935	0.00845695	0.0105634	0.0109558	0.0152518	0.0108202	0.0100544	0.0118932	0.0175968	0.0125243	0.00840809	0.0121508	0.0123374
cg26645063	ACTR2	Island	TSS200;TSS200	0.0327124	0.0205455	0.019635	0.0208699	0.0212889	0.0182475	0.0171518	0.0172622	0.0209642	0.0187054	0.0230711	0.0214072	0.0194972	0.0224807	0.0243952	0.0162192	0.020309	0.0207606
	ACTR2											0.097322									0.089705
cg00347616	ACTR3	N_Shore	TSS200	0.0171132	0.0191245	0.0202336	0.0201763	0.0179755	0.01745	0.0182342	0.0178372	0.0185181	0.0124263	0.0212519	0.0180556	0.0201413	0.0236631	0.026319	0.0127553	0.0179473	0.01907
cg03266956	ACTR3	N_Shore	TSS1500;TSS1500;TSS1500;Body	0.0212183	0.0179101	0.0210872	0.0197555	0.0190708	0.0179723	0.0189945	0.0186803	0.0193361	0.0144593	0.0203078	0.0207855	0.021275	0.0199152	0.0188035	0.0148886	0.0195906	0.0187532
cg05750963	ACTR3	N_Shore	TSS1500;TSS1500;TSS1500;Body	0.0224834	0.0256487	0.02422	0.0239497	0.0239532	0.0227426	0.0232136	0.0197893	0.0232501	0.0210491	0.0253647	0.0203951	0.0297433	0.0364685	0.0224672	0.0153094	0.0205863	0.0239229
cg07909749	ACTR3	N_Shore	TSS1500	0.0416672	0.0375883	0.0320794	0.0325954	0.0316969	0.0223768	0.030287	0.0291069	0.0321747	0.0334532	0.0385843	0.0398185	0.0299051	0.0418762	0.0324494	0.0264194	0.0320376	0.034318
cg08146034	ACTR3	N_Shore	TSS200	0.0523228	0.0383131	0.0401223	0.0464171	0.063473	0.0379247	0.034579	0.0280776	0.0426537	0.0762583	0.0250593	0.0390076	0.0850009	0.0509876	0.0381588	0.0406363	0.0342527	0.0486702
cg14373499	ACTR3	N_Shore	TSS1500	0.0367663	0.0390142	0.0350421	0.0441626	0.0341601	0.0362815	0.0303808	0.0403529	0.0370201	0.0181178	0.042933	0.041261	0.0306461	0.0505829	0.0378889	0.0320252	0.0353933	0.036106
cg14489030	ACTR3	N_Shore	TSS1500;TSS1500;Body	0.605387	0.698459	0.479784	0.596441	0.628131	0.52007	0.580269	0.615362	0.590488	0.62211	0.625974	0.743145	0.624173	0.648345	0.747741	0.721854	0.578565	0.663988
cg15517836	ACTR3	N_Shore	TSS200	0.03135	0.0224479	0.0234573	0.0325945	0.0183038	0.0233994	0.0184534	0.0218191	0.0239782	0.0360619	0.0236302	0.0260545	0.0408979	0.0360677	0.0267926	0.0348648	0.017179	0.0301936
cg26540127	ACTR3	N_Shore	TSS1500	0.0366826	0.0439768	0.0417314	0.0551569	0.0457281	0.0419135	0.0308213	0.0313967	0.0409259	0.0456379	0.0345916	0.0414872	0.0342307	0.0460224	0.0490063	0.0473811	0.0394761	0.0422292
	ACTR3											0.0920383									0.101917
cg00459289	ACTR3B	Island	TSS200;TSS200	0.0250263	0.0181177	0.019245	0.0184934	0.01992	0.0224079	0.0168565	0.0186242	0.0198364	0.0132003	0.0209944	0.0195285	0.0192704	0.0235629	0.017434	0.0142809	0.0182851	0.0183196
cg07998951	ACTR3B	N_Shore	TSS1500;TSS1500	0.470327	0.486122	0.477104	0.546651	0.361309	0.343436	0.438575	0.37221	0.436967	0.42364	0.413361	0.384072	0.243609	0.508009	0.373215	0.410413	0.39359	0.393739
cg08469909	ACTR3B	N_Shore	TSS1500;TSS1500;TSS1500;TSS1500	0.0325002	0.0379026	0.0317398	0.0380633	0.0357928	0.0359852	0.02891	0.0265184	0.0334265	0.0386666	0.0292575	0.0276296	0.0430422	0.0399309	0.040873	0.028546	0.0277682	0.0344642
cg09126741	ACTR3B	N_Shore	TSS1500;TSS1500	0.180783	0.149453	0.165707	0.295018	0.174219	0.074496	0.169259	0.138481	0.168427	0.203251	0.145871	0.163814	0.0940333	0.193961	0.133392	0.190846	0.161903	0.160884
cg10896886	ACTR3B	N_Shore	TSS200;TSS200	0.0203518	0.0234831	0.0209348	0.0244647	0.0233563	0.0173689	0.0198945	0.0189077	0.0210952	0.0426424	0.0174044	0.0210547	0.0408646	0.0293618	0.0335121	0.0205692	0.0205137	0.0282404
cg11290183	ACTR3B	Island	TSS200;TSS200;TSS200;TSS200	0.023632	0.0209518	0.0214501	0.0239814	0.0266017	0.0228523	0.0198701	0.0160431	0.0219228	0.019728	0.0215582	0.0186136	0.0217771	0.0275089	0.0191176	0.0211974	0.0191533	0.0210818
cg11792856	ACTR3B	N_Shore	TSS1500;TSS1500;TSS1500;TSS1500	0.0654534	0.0640033	0.081198	0.181366	0.0700916	0.0458825	0.0945704	0.0544754	0.0821301	0.126341	0.0861298	0.0804359	0.0399341	0.0999307	0.0819436	0.128804	0.067668	0.0888984
cg25152498	ACTR3B	Island	TSS200;TSS200	0.0171842	0.0171356	0.0191225	0.0208128	0.0197755	0.0172979	0.0157026	0.0164788	0.0179387	0.0133538	0.0183116	0.0195842	0.0178389	0.0228218	0.0197432	0.013232	0.0199594	0.0181056
cg25615010	ACTR3B	Island	TSS200;TSS200;TSS200;TSS200	0.0210334	0.0238518	0.0186817	0.0291997	0.0222833	0.0175324	0.0267773	0.018461	0.0222276	0.0205302	0.0186663	0.0201921	0.0290917	0.0389269	0.0215545	0.0214838	0.0188987	0.023668
	ACTR3B											0.0915523									0.0874889
cg25379012	ACTR3BP2		TSS1500	0.869042	0.875942	0.825076	0.877063	0.817577	0.691664	0.894369	0.878669	0.841175	0.619543	0.748365	0.652449	0.673149	0.750941	0.503933	0.634866	0.753705	0.667119
	ACTR3BP2											0.841175									0.667119
cg18190411	ACTR3BP5		TSS1500	0.377796	0.40185	0.346244	0.455093	0.392304	0.236617	0.340536	0.333223	0.360458	0.134355	0.206648	0.338902	0.26254	0.366449	0.195153	0.393599	0.34829	0.280742
	ACTR3BP5											0.360458									0.280742
cg00986050	ACTR5	Island	TSS200	0.094138	0.0558778	0.0664085	0.0697093	0.0729197	0.0576946	0.0837144	0.0510277	0.0689363	0.122884	0.041947	0.0722759	0.11634	0.10852	0.0713398	0.0665596	0.0550692	0.0818669
cg03532554	ACTR5	Island	TSS200	0.0543199	0.0286016	0.0289264	0.0304263	0.0345723	0.0408322	0.0327874	0.0218313	0.0340372	0.0930772	0.0191706	0.0361441	0.0951152	0.0713522	0.0324088	0.0112642	0.0259139	0.0480558
cg07276383	ACTR5	N_Shore	TSS1500	0.333437	0.359018	0.388973	0.378059	0.333556	0.389123	0.312816	0.410315	0.363162	0.484274	0.326718	0.333159	0.415669	0.318263	0.326445	0.342351	0.313132	0.357501
cg07520491	ACTR5	N_Shore	TSS1500	0.464194	0.5439	0.483642	0.549854	0.396529	0.505693	0.452986	0.538078	0.49186	0.619355	0.466525	0.453362	0.49499	0.466793	0.401387	0.468077	0.446916	0.477176
cg09937324	ACTR5	Island	TSS200	0.020674	0.0309435	0.0224258	0.0337681	0.020835	0.0180678	0.0174791	0.0226964	0.0233612	0.0377373	0.0220541	0.0244786	0.0246526	0.039716	0.0274537	0.0197588	0.0227706	0.0273277
cg14374842	ACTR5	N_Shore	TSS1500	0.0522337	0.0360595	0.0440122	0.0372364	0.0448818	0.0383707	0.0365727	0.0244331	0.039225	0.0477222	0.0355433	0.0364539	0.0332273	0.0544006	0.035491	0.029489	0.0302632	0.0378238
cg15298358	ACTR5	Island	TSS200	0.059768	0.0229334	0.0329826	0.0383483	0.0370791	0.039892	0.0441417	0.0259999	0.0376431	0.0443923	0.0197089	0.0381039	0.0690852	0.064344	0.0335438	0.0291366	0.0270685	0.0406729
cg21753290	ACTR5	Island	TSS200	0.0288569	0.0342504	0.0290527	0.0259952	0.0313696	0.031818	0.0391677	0.0208849	0.0301744	0.0783308	0.0159464	0.0225053	0.0918985	0.0732997	0.0257844	0.0187845	0.0183025	0.0431065
cg23099980	ACTR5	N_Shore	TSS1500	0.0260518	0.0316929	0.0325486	0.0360432	0.0337239	0.0271747	0.0283804	0.025908	0.0301904	0.0276067	0.0352293	0.0297891	0.0428354	0.0446238	0.0288339	0.0343791	0.0310457	0.0342929
	ACTR5											0.124288									0.127536
cg02789276	ACTR6	Island	TSS1500;TSS1500;TSS200	0.0193025	0.0287319	0.0244027	0.0244845	0.02277	0.0336859	0.0213539	0.0238955	0.0248284	0.0328841	0.0218935	0.0261999	0.028333	0.0351422	0.0249012	0.0218398	0.023803	0.0268746
cg05799491	ACTR6	Island	5'UTR;1stExon;TSS200;TSS200	0.0281402	0.0248394	0.0305079	0.0276114	0.0273565	0.0246154	0.0305239	0.0264521	0.0275059	0.0250927	0.0267139	0.0289364	0.0311766	0.0331597	0.0260266	0.0228591	0.0279256	0.0277363
cg06095699	ACTR6	N_Shore	TSS200	0.0245217	0.0785185	0.0666474	0.0596695	0.0570019	0.0627435	0.0740861	0.0889873	0.064022	0.079628	0.070499	0.0631716	0.0759796	0.0830662	0.0671742	0.0337198	0.0610442	0.0667853
cg07880548	ACTR6	Island	TSS1500;TSS1500;TSS200	0.0301332	0.0411116	0.0263575	0.0333216	0.0382177	0.0349871	0.0359976	0.0267367	0.0333579	0.0245495	0.0327579	0.0257061	0.0332969	0.0489158	0.0203755	0.0171387	0.0257529	0.0285617
cg08630055	ACTR6	Island	TSS1500	0.0342256	0.0263634	0.0294331	0.0299674	0.0287046	0.0298522	0.0227413	0.0280848	0.0286716	0.0235612	0.029799	0.0288555	0.0311467	0.0327953	0.0294127	0.0231594	0.0296938	0.028553
cg08946801	ACTR6	N_Shore	TSS200	0.0619942	0.0736529	0.0537192	0.070998	0.067959	0.0675119	0.0932421	0.0702249	0.0699128	0.127442	0.0811982	0.0794583	0.0296156	0.0138559	0.0315661	0.0470354	0.0615659	0.0589672
cg09464487	ACTR6	Island	TSS1500	0.0309392	0.0261476	0.0209985	0.0235312	0.0214857	0.0198278	0.0301483	0.0163708	0.0236811	0.0585505	0.0171229	0.0206218	0.0273856	0.0379208	0.0227301	0.0135564	0.0180395	0.0269909
cg12056857	ACTR6	Island	TSS1500	0.118556	0.0818964	0.090304	0.0917737	0.0545465	0.0368563	0.0741945	0.0455512	0.0742098	0.17398	0.0661309	0.0891476	0.0900872	0.138576	0.0851734	0.0490287	0.072846	0.0956212
cg12425800	ACTR6	N_Shore	TSS1500	0.692626	0.837052	0.650837	0.661365	0.771334	0.655567	0.701174	0.621567	0.69894	0.778488	0.50879	0.640653	0.672848	0.69344	0.540427	0.54998	0.66074	0.630671
cg16785387	ACTR6	N_Shore	TSS200	0.0604039	0.0795758	0.0674182	0.0667738	0.0742819	0.0805858	0.0933708	0.0943599	0.0770963	0.164439	0.070601	0.0739238	0.0815731	0.0975464	0.0462751	0.0620788	0.050559	0.0808745
cg20707666	ACTR6	N_Shore	TSS1500	0.0465653	0.0349849	0.0449903	0.0407508	0.0491452	0.0520924	0.0356301	0.0411386	0.0431622	0.0304266	0.0380705	0.0418625	0.0563192	0.0471155	0.0411713	0.0400303	0.0378436	0.0416049
cg21601160	ACTR6	N_Shore	TSS1500	0.728461	0.813515	0.755932	0.816969	0.815001	0.790739	0.78771	0.773926	0.785282	0.826546	0.755314	0.772484	0.735908	0.812648	0.748755	0.770723	0.826341	0.78109
cg22902765	ACTR6	Island	5'UTR;1stExon;TSS200;TSS200	0.0125075	0.0164117	0.0140023	0.0142295	0.00522984	0.0132068	0.0140658	0.0135846	0.0129048	0.0160882	0.0143964	0.0140555	0.016028	0.0214889	0.0130994	0.0112441	0.0146985	0.0151374
cg26647736	ACTR6	Island	TSS1500	0.0242915	0.0216765	0.0256755	0.0264598	0.0247726	0.0222166	0.02064	0.0202987	0.0232539	0.0594958	0.0217722	0.0259723	0.0270658	0.0329916	0.0301016	0.0210029	0.0237685	0.0302713
	ACTR6											0.141916									0.138553
cg01163515	ACTR8	S_Shore	TSS1500	0.930353	0.935523	0.936563	0.932331	0.923957	0.923347	0.927483	0.933471	0.930378	0.944707	0.92666	0.929772	0.92258	0.929188	0.920151	0.937176	0.938876	0.931139
cg03335521	ACTR8	S_Shore	TSS1500	0.634984	0.707659	0.811662	0.72306	0.681046	0.819494	0.653227	0.845064	0.734525	0.866797	0.747084	0.793733	0.727562	0.679427	0.562379	0.707341	0.668871	0.719149
cg06203251	ACTR8	S_Shore	TSS1500	0.835964	0.868969	0.85129	0.888261	0.85871	0.862576	0.876586	0.867768	0.863765	0.829701	0.802444	0.821072	0.841426	0.85287	0.828836	0.863045	0.861293	0.837586
cg18340446	ACTR8	Island	TSS200	0.0105917	0.0157002	0.014532	0.017178	0.0147067	0.0140052	0.0118018	0.0155331	0.0142561	0.0138016	0.0136266	0.0147649	0.0149546	0.0270294	0.0148972	0.0129593	0.0180788	0.016264
cg20879770	ACTR8	S_Shore	TSS1500	0.714375	0.811383	0.782674	0.816352	0.73442	0.828027	0.703696	0.764925	0.769481	0.82415	0.846892	0.792796	0.793043	0.773162	0.58073	0.722222	0.812121	0.76814
cg21252968	ACTR8	S_Shore	TSS200	0.0427359	0.0471718	0.0712539	0.0501509	0.0544472	0.033072	0.0488023	0.0534255	0.0501324	0.038368	0.0354139	0.0518797	0.0412802	0.0518437	0.0510581	0.0589614	0.0348446	0.0454562
cg21515283	ACTR8	S_Shore	TSS1500	0.0265706	0.0225225	0.0246122	0.0277669	0.0246318	0.0204076	0.0205655	0.0247437	0.0239776	0.0231078	0.0217052	0.0257843	0.026912	0.0315018	0.0207173	0.0176083	0.0213056	0.0235803
cg22619628	ACTR8	S_Shore	TSS1500	0.703274	0.717402	0.748541	0.77551	0.666059	0.703745	0.708475	0.748144	0.721394	0.804783	0.732064	0.706935	0.647704	0.734434	0.587898	0.667883	0.729903	0.70145
cg23902841	ACTR8	S_Shore	TSS200	0.0257147	0.0263296	0.0286275	0.0345395	0.0307183	0.0222831	0.022882	0.0317901	0.0278606	0.0280279	0.0237188	0.0276968	0.0210494	0.0360302	0.0288519	0.0222191	0.0269202	0.0268143
cg26742183	ACTR8	Island	TSS200	0.0421453	0.0369651	0.0457112	0.0590861	0.0590906	0.0395301	0.0461008	0.0559553	0.0480731	0.0526949	0.0511384	0.0379843	0.0410327	0.0641086	0.0424456	0.0622126	0.0337576	0.0481718
	ACTR8											0.418384									0.411775
cg09840989	ACTRT1		TSS1500	0.67309	0.787225	0.696559	0.78507	0.785396	0.74649	0.778932	0.753415	0.750772	0.753704	0.706869	0.615549	0.744072	0.756129	0.806307	0.759206	0.789122	0.74137
	ACTRT1											0.750772									0.74137
cg02828779	ACTRT2	N_Shelf	TSS1500	0.709269	0.811513	0.664209	0.770184	0.759073	0.736549	0.762079	0.776089	0.748621	0.561369	0.798138	0.539065	0.590413	0.789006	0.4453	0.766619	0.733096	0.652876
cg04716261	ACTRT2	N_Shore	TSS200	0.179077	0.225601	0.196121	0.205452	0.222012	0.19051	0.198434	0.192081	0.201161	0.224958	0.253544	0.145956	0.217035	0.289484	0.119407	0.298297	0.164888	0.214196
cg05348888	ACTRT2	N_Shore	TSS1500	0.846567	0.911515	0.798685	0.899187	0.884839	0.8701	0.854717	0.888719	0.869291	0.908113	0.924757	0.758801	0.863765	0.90663	0.771617	0.881523	0.901078	0.864535
cg13871495	ACTRT2	N_Shore	TSS1500	0.958395	0.976777	0.968159	0.972171	0.973986	0.973783	0.972924	0.966128	0.97029	0.959452	0.965143	0.972418	0.950042	0.966031	0.970068	0.977731	0.974581	0.966933
cg15211996	ACTRT2	N_Shore	TSS1500	0.58771	0.633204	0.539244	0.655473	0.577852	0.441255	0.599204	0.599878	0.579228	0.414092	0.613605	0.436919	0.475797	0.695737	0.328059	0.662561	0.55921	0.523247
	ACTRT2											0.673718									0.644358
cg00495036	ACVR1		TSS1500	0.033316	0.039126	0.0833263	0.0728172	0.0685555	0.118574	0.0615678	0.0487698	0.0657566	0.217327	0.114878	0.0934929	0.048428	0.0685932	0.105306	0.0634969	0.0727772	0.0980374
cg02089380	ACVR1		TSS1500;TSS1500	0.0137892	0.029819	0.0110595	0.0130439	0.0127679	0.0117969	0.0247753	0.0122447	0.0161621	0.100494	0.00984272	0.0126006	0.065972	0.076259	0.015866	0.00730385	0.00996824	0.0372883
cg03263168	ACVR1		TSS1500;TSS1500	0.0256963	0.0226243	0.0198834	0.0228902	0.0226539	0.0219466	0.0185787	0.0225577	0.0221039	0.0178048	0.0195796	0.0209545	0.0162666	0.027269	0.0249154	0.0186201	0.017061	0.0203089
cg09971156	ACVR1		TSS1500	0.0419459	0.0403042	0.018332	0.0349451	0.0465885	0.0201492	0.0378312	0.0284795	0.033572	0.0392702	0.0252116	0.0305772	0.0550892	0.0786574	0.0303324	0.0271817	0.035415	0.0402168
cg25245334	ACVR1		TSS1500;TSS1500	0.0729877	0.0524571	0.0542783	0.0512442	0.0574732	0.0537169	0.0706337	0.0348552	0.0559558	0.1174	0.0337675	0.0487979	0.106528	0.0969382	0.0579089	0.0528925	0.0460344	0.0700334
	ACVR1											0.0387101									0.053177
cg01259359	ACVR1B	N_Shore	TSS1500;TSS1500	0.0258206	0.0208155	0.0193599	0.0198877	0.0250853	0.0177297	0.0218067	0.0178891	0.0210493	0.0273384	0.0178406	0.0280761	0.0314071	0.0250913	0.0179787	0.0310683	0.0165955	0.0244245
cg01715276	ACVR1B	N_Shore	TSS200;TSS200	0.0146543	0.0198683	0.0138852	0.0136297	0.0156527	0.0146005	0.012792	0.0130485	0.0147664	0.0171713	0.0136967	0.0153093	0.0273842	0.0230817	0.0143241	0.0101647	0.0136359	0.016846
cg05940536	ACVR1B	N_Shore	TSS1500;TSS1500;TSS1500	0.0267156	0.0295418	0.0301852	0.0314588	0.0313495	0.0297405	0.0133277	0.0245485	0.0271084	0.0306814	0.0251287	0.026991	0.025681	0.0388821	0.0251683	0.0162206	0.026267	0.0268775
cg10565832	ACVR1B	N_Shore	TSS1500;TSS1500	0.932119	0.955279	0.926879	0.940349	0.938575	0.848385	0.952749	0.93464	0.928622	0.924428	0.91446	0.924172	0.877583	0.913771	0.814844	0.892432	0.918458	0.897519
cg14378593	ACVR1B	N_Shore	TSS1500;TSS1500;TSS1500	0.0106722	0.0239665	0.011689	0.0151139	0.0111426	0.0106468	0.013032	0.0116911	0.0134943	0.0455092	0.0119144	0.0105559	0.076864	0.072484	0.0115683	0.00841346	0.0144041	0.0314642
cg17389218	ACVR1B	N_Shore	TSS1500;TSS1500;TSS1500	0.0224783	0.0230087	0.0237495	0.0275136	0.0278078	0.0239709	0.0186159	0.0233066	0.0238064	0.0177791	0.0258044	0.022327	0.0228433	0.0267818	0.0226393	0.0205393	0.0235991	0.0227892
	ACVR1B											0.171474									0.169987
cg05010623	ACVR1C	S_Shore	TSS1500;TSS1500;TSS1500	0.076583	0.0622457	0.0782085	0.0793344	0.0535678	0.0718529	0.0757468	0.0505511	0.0685113	0.090773	0.0479495	0.0925872	0.0479163	0.0888987	0.0639609	0.0608244	0.0632233	0.0695167
cg08651064	ACVR1C	S_Shore	TSS1500;TSS1500;TSS1500	0.0491514	0.0347375	0.0535016	0.0474641	0.0647523	0.0408733	0.050851	0.0455464	0.0483597	0.0396614	0.0286049	0.028235	0.0604791	0.0548549	0.0381158	0.0299511	0.0421457	0.040256
cg09667023	ACVR1C	Island	TSS200;TSS200;TSS200	0.0244066	0.0447405	0.0264943	0.0361029	0.0343971	0.0226426	0.0337392	0.0338967	0.0320525	0.0268169	0.0276961	0.0304287	0.0351774	0.0452285	0.0283802	0.0176877	0.0300964	0.030189
cg14635198	ACVR1C	S_Shore	TSS1500;TSS1500;TSS1500	0.771314	0.66712	0.658148	0.794738	0.758263	0.661099	0.730302	0.737764	0.722344	0.67375	0.680254	0.682369	0.783845	0.767556	0.691942	0.684868	0.618059	0.69783
cg17868920	ACVR1C	Island	TSS200;TSS200;TSS200	0.0227821	0.0240094	0.0323098	0.0226444	0.0280765	0.0221623	0.0231505	0.0242838	0.0249273	0.0169768	0.0238136	0.0247543	0.0284394	0.0374863	0.0294638	0.0277821	0.0219462	0.0263328
cg18004523	ACVR1C	Island	TSS200;TSS200;TSS200	0.0220801	0.02664	0.0292136	0.0344564	0.0309028	0.0245445	0.0233384	0.0194755	0.0263314	0.0436852	0.0236376	0.0264624	0.0283963	0.0412587	0.0289814	0.0197986	0.0224328	0.0293316
cg18156033	ACVR1C	Island	TSS200;TSS200;TSS200	0.0453226	0.0533052	0.0604105	0.0575359	0.0490566	0.0493003	0.0563492	0.0405808	0.0514826	0.0655195	0.036467	0.0480787	0.0779918	0.0582653	0.0513793	0.0478581	0.0401536	0.0532142
cg19617792	ACVR1C	Island	TSS200;TSS200;TSS200	0.0168297	0.0175217	0.0176377	0.0190788	0.0175721	0.0132838	0.0122852	0.0212017	0.0169263	0.0146247	0.0179748	0.0153342	0.0147523	0.0207575	0.0175745	0.0167579	0.0172967	0.0168841
cg19628881	ACVR1C	S_Shore	TSS1500;TSS1500;TSS1500	0.376704	0.480055	0.325413	0.412539	0.351176	0.292568	0.390558	0.306179	0.366899	0.162917	0.225585	0.288829	0.303759	0.397144	0.245799	0.287301	0.260436	0.271471
	ACVR1C											0.15087									0.137225
cg02093647	ACVR2A	Island	TSS200	0.0811581	0.0889943	0.0483511	0.0552532	0.0469507	0.0449823	0.0839876	0.038782	0.0610574	0.178984	0.0395403	0.0454191	0.170876	0.124361	0.0631082	0.0425208	0.0454606	0.0887838
cg08385422	ACVR2A	Island	TSS1500;TSS200;TSS200	0.0287531	0.0286009	0.0314341	0.0282149	0.0282778	0.0258611	0.023045	0.0238904	0.0272597	0.0172686	0.0280814	0.0267471	0.042254	0.0319649	0.0244023	0.0196517	0.022918	0.026661
cg10083178	ACVR2A	Island	TSS1500;TSS1500;TSS1500	0.0316858	0.0304079	0.0380634	0.0466424	0.0358287	0.593283	0.0530486	0.0414866	0.108806	0.398573	0.451275	0.315657	0.407165	0.0409659	0.434361	0.375136	0.19873	0.327733
cg12968518	ACVR2A	Island	TSS200	0.249001	0.227139	0.195692	0.205939	0.38629	0.254051	0.452157	0.272383	0.280331	0.356964	0.241362	0.229282	0.266519	0.196962	0.26925	0.251023	0.188394	0.24997
cg14420245	ACVR2A	N_Shore	TSS1500	0.21659	0.258552	0.256938	0.31766	0.325422	0.566252	0.183303	0.294609	0.302416	0.500988	0.332489	0.308265	0.353169	0.308767	0.409498	0.393862	0.353061	0.370012
cg14425722	ACVR2A	Island	TSS1500	0.0324329	0.0306841	0.0416236	0.0355417	0.0347363	0.451007	0.0303902	0.0232924	0.0849635	0.270081	0.291774	0.188117	0.269448	0.0545448	0.33703	0.266488	0.129019	0.225813
cg14426421	ACVR2A	N_Shore	TSS1500;TSS1500;TSS1500	0.0649017	0.0538159	0.0707607	0.0883737	0.0446838	0.418978	0.0450075	0.0521625	0.104835	0.401654	0.35739	0.201085	0.34643	0.073486	0.323561	0.275376	0.15702	0.267
cg14689355	ACVR2A	Island	TSS200	0.0857641	0.0911656	0.0650361	0.0646358	0.0674697	0.0638012	0.0786957	0.0472539	0.0704778	0.151255	0.0521256	0.0632706	0.138071	0.12175	0.0683187	0.0503266	0.0578901	0.0878759
cg21579828	ACVR2A	Island	TSS1500	0.0417836	0.0321104	0.0370249	0.0387193	0.0378843	0.0285369	0.0235633	0.0300563	0.0337099	0.0242225	0.03294	0.0318571	0.0396131	0.0573103	0.0315415	0.0220685	0.035908	0.0344326
	ACVR2A											0.119317									0.186476
cg10999429	ACVRL1	Island	TSS1500	0.0611781	0.0450918	0.0417534	0.0657857	0.052992	0.265655	0.0892726	0.0679009	0.0862037	0.0216332	0.0879113	0.054699	0.114582	0.0879929	0.0586397	0.0397715	0.0525513	0.0647226
cg12193731	ACVRL1	Island	TSS1500	0.22444	0.240458	0.194084	0.387089	0.41266	0.666086	0.157998	0.33383	0.327081	0.513684	0.551635	0.39549	0.50023	0.342888	0.475755	0.498136	0.316498	0.44929
cg18797453	ACVRL1	N_Shore	TSS1500	0.411538	0.450422	0.391228	0.400939	0.377533	0.552067	0.398171	0.374971	0.419609	0.514515	0.547883	0.4229	0.433244	0.437817	0.365987	0.452777	0.459492	0.454327
cg26372400	ACVRL1	Island	TSS1500	0.130316	0.148926	0.129677	0.256085	0.252164	0.58398	0.116681	0.203285	0.227639	0.511611	0.49173	0.218609	0.353275	0.208186	0.251369	0.392764	0.22557	0.331639
cg27112470	ACVRL1	N_Shore	TSS1500	0.294281	0.238643	0.312408	0.301193	0.211129	0.52325	0.2911	0.309318	0.310165	0.531126	0.503641	0.379419	0.324911	0.29605	0.311985	0.369508	0.331486	0.381016
cg27360691	ACVRL1	N_Shore	TSS1500	0.425477	0.498546	0.466115	0.455216	0.413047	0.633555	0.47288	0.49464	0.482434	0.676467	0.550916	0.485379	0.517766	0.483273	0.454777	0.442973	0.461988	0.509192
	ACVRL1											0.308855									0.365031
cg01458759	ACY1	Island	TSS1500	0.0224178	0.027378	0.0263478	0.0219139	0.021225	0.0282244	0.0444252	0.0173761	0.0261635	0.0531523	0.0210433	0.0167637	0.0397193	0.043517	0.0236252	0.0164444	0.0228771	0.0296428
cg01527800	ACY1	N_Shore	TSS1500;TSS1500;TSS1500;TSS1500;TSS1500;Body	0.0420532	0.0331738	0.0374206	0.0299497	0.042036	0.0415682	0.0303418	0.0222697	0.0348516	0.0259631	0.0234755	0.0330572	0.0334771	0.0475212	0.0350974	0.0138768	0.0317115	0.0305225
cg03891319	ACY1	N_Shore	TSS1500	0.066155	0.0372984	0.0505722	0.0609588	0.0460162	0.0483762	0.0620713	0.0308233	0.0502839	0.0612863	0.0340678	0.0328788	0.0478398	0.0529395	0.0444656	0.0346682	0.0412993	0.0436807
cg03949181	ACY1	Island	TSS200;TSS200;TSS200;TSS200;TSS200;Body	0.021858	0.0297805	0.0231326	0.0352369	0.0315623	0.0260598	0.0292488	0.0256003	0.0278099	0.0262169	0.0297338	0.0310194	0.0564693	0.0422164	0.0333916	0.0183557	0.0317515	0.0336443
cg05705352	ACY1	Island	TSS200;TSS200;TSS200;TSS200;TSS200;Body	0.0678075	0.0384007	0.0370486	0.0619278	0.0490402	0.0503237	0.0610643	0.0286422	0.0492819	0.0659592	0.0350099	0.04056	0.096226	0.0585477	0.0415015	0.0509769	0.0310539	0.0524794
cg06162883	ACY1	N_Shore	TSS1500;TSS1500;TSS1500;TSS1500;TSS1500;Body	0.0824046	0.0615775	0.0670645	0.0776477	0.069403	0.0715764	0.0715677	0.0520888	0.0691663	0.104261	0.0584982	0.0689429	0.111788	0.0751732	0.0870827	0.0711012	0.0540594	0.0788633
cg08237922	ACY1	N_Shore	TSS1500;TSS1500;TSS1500;TSS1500;TSS1500;Body	0.0334707	0.0333449	0.0297006	0.0357167	0.032842	0.0319088	0.0269225	0.0273292	0.0314044	0.0411547	0.025882	0.0279176	0.0267231	0.0381895	0.0320268	0.0183257	0.024841	0.0293826
cg10690327	ACY1	Island	TSS200;TSS200;TSS200;TSS200;TSS200;Body	0.0847975	0.0396634	0.0436474	0.0425064	0.0470669	0.0901743	0.127233	0.0370937	0.0640228	0.0446696	0.0389744	0.0430663	0.150212	0.0635302	0.0619437	0.110229	0.0403864	0.0691265
cg11440409	ACY1	Island	TSS200	0.0168027	0.0149943	0.0135327	0.0172801	0.013992	0.0109929	0.0112019	0.0114344	0.0137789	0.0161729	0.0118193	0.0137277	0.0197109	0.0237057	0.0150112	0.00862297	0.0163184	0.0156361
cg18509826	ACY1	Island	TSS200	0.0310481	0.0404544	0.0305069	0.0372484	0.0351136	0.0280324	0.0254932	0.025462	0.0316699	0.0263842	0.0293848	0.0284211	0.053768	0.0646346	0.0307459	0.0236467	0.0291665	0.035769
cg25717799	ACY1	Island	TSS200	0.0503589	0.0418916	0.03151	0.0411584	0.0345877	0.0422405	0.0347862	0.0199126	0.0370557	0.0789009	0.0234201	0.030222	0.0716857	0.0905625	0.0281097	0.0190627	0.0300776	0.0465051
	ACY1											0.0395899									0.0422957
cg00350199	ACY3		TSS200	0.327132	0.244376	0.279993	0.288162	0.254042	0.508601	0.270824	0.269462	0.305324	0.486899	0.393913	0.375598	0.406915	0.320546	0.429655	0.284987	0.375024	0.384192
cg04565008	ACY3		TSS200	0.415135	0.409455	0.376428	0.373774	0.392607	0.591927	0.39693	0.348776	0.413129	0.570414	0.491244	0.475773	0.457917	0.43272	0.483827	0.374471	0.485214	0.471447
cg04986336	ACY3		TSS1500	0.53482	0.407421	0.419286	0.475245	0.43512	0.709146	0.503015	0.321164	0.475652	0.606974	0.48024	0.550637	0.58013	0.558259	0.662703	0.552752	0.518331	0.563753
cg06148175	ACY3		TSS200	0.385356	0.412499	0.398383	0.374868	0.389225	0.666939	0.411035	0.326754	0.420632	0.574915	0.528523	0.566379	0.480602	0.459735	0.583995	0.367095	0.574338	0.516948
cg09296957	ACY3		TSS200	0.473932	0.452614	0.421442	0.398857	0.395625	0.709285	0.46811	0.334283	0.456769	0.603673	0.552762	0.529437	0.554582	0.504655	0.580745	0.41192	0.548793	0.535821
cg12355172	ACY3		TSS200	0.540575	0.43262	0.452435	0.440961	0.380847	0.846511	0.482235	0.281819	0.48225	0.697329	0.573996	0.614739	0.710691	0.535886	0.699635	0.461699	0.575029	0.608626
cg23130075	ACY3		TSS1500	0.651048	0.669885	0.548997	0.520321	0.562966	0.828242	0.572677	0.525807	0.609993	0.77194	0.759592	0.778358	0.744956	0.643591	0.736995	0.566282	0.745234	0.718368
cg25835179	ACY3		TSS200	0.443122	0.415116	0.393892	0.354448	0.374548	0.697085	0.447265	0.310228	0.429463	0.687092	0.572895	0.581156	0.607732	0.491035	0.575324	0.373829	0.540435	0.553687
	ACY3											0.449152									0.544105
cg01578221	ACYP1		TSS200;TSS200	0.0469218	0.0230817	0.0204442	0.0192086	0.0250236	0.0295672	0.0257925	0.0165763	0.025827	0.0439891	0.0157473	0.0207265	0.0430961	0.0368451	0.0222441	0.0329444	0.0220277	0.0297025
cg01903327	ACYP1		TSS1500;TSS1500	0.57641	0.589014	0.610838	0.521655	0.537955	0.565972	0.614925	0.510949	0.565965	0.457535	0.446194	0.528571	0.448825	0.589638	0.40926	0.414976	0.584755	0.484969
cg02183680	ACYP1		TSS200;TSS200	0.0363843	0.0410644	0.0434195	0.0474665	0.0382685	0.0345821	0.0483846	0.0408165	0.0412983	0.028939	0.0343799	0.0462546	0.0391441	0.0471492	0.0336909	0.0262702	0.0378116	0.0367049
cg04905116	ACYP1		TSS1500;TSS1500;TSS1500;TSS1500;Body;Body	0.77835	0.875327	0.750587	0.826755	0.88387	0.721053	0.8376	0.796878	0.808803	0.723479	0.587985	0.685234	0.519837	0.757661	0.562163	0.588524	0.679552	0.638054
cg06889350	ACYP1		TSS1500;TSS1500	0.0874021	0.042454	0.055042	0.0601576	0.0598306	0.0702799	0.0803642	0.0350784	0.0613261	0.0804227	0.0345562	0.0471869	0.0863718	0.0576706	0.049905	0.0639459	0.0411234	0.0576478
cg08660418	ACYP1	N_Shelf	TSS1500;TSS1500;TSS1500;TSS1500;Body;Body	0.899387	0.917071	0.906597	0.926431	0.90747	0.898012	0.881	0.907445	0.905427	0.821929	0.922125	0.878487	0.908398	0.898574	0.91347	0.914043	0.885661	0.892836
cg10638397	ACYP1		TSS200;TSS200;TSS200;TSS200;Body;Body	0.0292545	0.033379	0.0334455	0.0463259	0.0337567	0.0346041	0.0511102	0.0382763	0.037519	0.0279135	0.03474	0.0264373	0.0397977	0.0462175	0.0353543	0.0041952	0.0294456	0.0305126
cg12075442	ACYP1	N_Shelf	TSS1500;TSS1500	0.868666	0.894349	0.845166	0.899982	0.915957	0.873054	0.904066	0.909242	0.88881	0.880024	0.874366	0.87553	0.872869	0.836108	0.811718	0.746721	0.880217	0.847194
cg14984307	ACYP1		TSS200;TSS200	0.0393534	0.0381753	0.0315843	0.0279066	0.0303402	0.0405939	0.0347374	0.0259994	0.0335863	0.0337001	0.0324716	0.0299204	0.0412562	0.0470278	0.0312238	0.015567	0.039937	0.033888
cg16235008	ACYP1		TSS200;TSS200	0.0427665	0.0428394	0.0352474	0.0649678	0.033645	0.0414841	0.032279	0.0393821	0.0415764	0.0527665	0.0340644	0.0337683	0.0649243	0.0496239	0.031746	0.0184669	0.0280953	0.039182
	ACYP1											0.341014									0.309069
cg02538752	ACYP2	N_Shore	TSS1500	0.748646	0.679579	0.795547	0.710142	0.70035	0.84911	0.67501	0.785044	0.742929	0.850041	0.769584	0.783501	0.777793	0.683032	0.8038	0.736122	0.764201	0.771009
cg05172061	ACYP2	N_Shore	TSS1500	0.944629	0.938511	0.916393	0.946846	0.948705	0.951543	0.947568	0.950491	0.943086	0.949822	0.954315	0.948346	0.944109	0.94133	0.945817	0.953926	0.945097	0.947845
cg22738152	ACYP2	N_Shore	TSS1500	0.91979	0.938823	0.88823	0.913042	0.920786	0.931447	0.913567	0.902494	0.916022	0.913779	0.926838	0.893411	0.922088	0.904856	0.919537	0.933452	0.920151	0.916764
	ACYP2											0.867346									0.878539
cg05749441	ADA	S_Shore	TSS1500	0.0369249	0.0405353	0.0399694	0.040476	0.0419715	0.0378221	0.0369111	0.040967	0.0394472	0.0817628	0.0422725	0.0372171	0.0542485	0.0486056	0.0301308	0.0317177	0.0337735	0.0449661
cg05870271	ADA	S_Shore	TSS1500	0.0284504	0.0362444	0.042606	0.0355839	0.0340951	0.0288374	0.0359443	0.037525	0.0349108	0.0510236	0.0410783	0.0335707	0.0415658	0.043895	0.0322017	0.0270255	0.034162	0.0380653
cg06049791	ADA	Island	TSS1500	0.0383733	0.040465	0.0344269	0.0330559	0.0394437	0.0259379	0.0399313	0.027562	0.0348995	0.0348111	0.0274962	0.0284112	0.0577696	0.0619487	0.0349307	0.026273	0.0308354	0.0378095
cg06079428	ADA	Island	TSS200	0.010212	0.0122959	0.0124233	0.0145131	0.0148938	0.0105865	0.0101674	0.0112248	0.0120396	0.019724	0.0119681	0.0108255	0.0155655	0.018686	0.0136043	0.00867748	0.0115956	0.0138308
cg08283932	ADA	Island	TSS1500	0.0221043	0.0252161	0.0226038	0.0218893	0.0236885	0.0213657	0.0181767	0.024675	0.0224649	0.01654	0.0223835	0.0226643	0.0208156	0.0249883	0.0131197	0.0175194	0.0229919	0.0201278
cg18704595	ADA	S_Shore	TSS1500	0.0405546	0.0477294	0.0494401	0.0418395	0.05689	0.0501426	0.0589908	0.0481668	0.0492192	0.0522696	0.126135	0.0479972	0.0502083	0.0554455	0.0357726	0.042841	0.0415682	0.0565297
cg19969349	ADA	S_Shore	TSS1500	0.0178079	0.0246399	0.0231531	0.0267693	0.0221453	0.0283381	0.0219117	0.0272836	0.0240061	0.0269464	0.0752653	0.0237629	0.0370233	0.0329528	0.0410732	0.0174732	0.0207867	0.0344105
	ADA											0.0309982									0.0351057
cg00152611	ADAD1	N_Shore	5'UTR;TSS1500;TSS1500	0.793568	0.895098	0.741479	0.866223	0.827689	0.884266	0.847561	0.836739	0.836578	0.53626	0.814213	0.682597	0.57069	0.823902	0.581231	0.856621	0.901286	0.72085
cg00257303	ADAD1	N_Shore	5'UTR;TSS1500;TSS1500	0.924345	0.951364	0.895104	0.922217	0.935482	0.943679	0.939562	0.943368	0.93189	0.929223	0.943851	0.934324	0.867384	0.928843	0.919005	0.931645	0.937771	0.924006
cg00571090	ADAD1	Island	5'UTR;TSS200;TSS200	0.951697	0.940644	0.931544	0.911971	0.928	0.945034	0.944942	0.928639	0.935309	0.946365	0.933224	0.913282	0.884889	0.936644	0.948081	0.957956	0.930422	0.931358
cg03155733	ADAD1	N_Shore	TSS1500	0.812002	0.870272	0.802516	0.832891	0.830147	0.860524	0.789062	0.832379	0.828724	0.815472	0.775808	0.741175	0.768422	0.833541	0.781552	0.859365	0.820982	0.79954
cg06523752	ADAD1	N_Shore	TSS1500;TSS1500;TSS200	0.836676	0.882317	0.850838	0.905598	0.905909	0.899036	0.900238	0.851863	0.879059	0.852841	0.865757	0.772068	0.619007	0.909352	0.866572	0.90029	0.881445	0.833417
cg06968876	ADAD1	N_Shore	TSS1500;TSS1500;TSS1500	0.680646	0.725421	0.700311	0.730736	0.765612	0.751137	0.735229	0.687985	0.722135	0.563299	0.656735	0.559134	0.663411	0.719776	0.666055	0.676785	0.686031	0.648903
cg08149600	ADAD1	N_Shore	TSS1500;TSS1500;TSS200	0.904032	0.89608	0.884696	0.905079	0.902041	0.90885	0.914229	0.876444	0.898931	0.923875	0.887413	0.867903	0.895924	0.897663	0.868826	0.922133	0.907996	0.896467
cg10668096	ADAD1	Island	5'UTR;TSS200;TSS200	0.975772	0.983157	0.929084	0.956959	0.944883	0.975946	0.9874	0.952855	0.963257	0.974356	0.977934	0.871272	0.875447	0.968719	0.956941	0.978592	0.973248	0.947064
cg15843370	ADAD1	N_Shore	TSS1500;TSS1500;1stExon;5'UTR	0.717229	0.713731	0.710992	0.727895	0.674564	0.782597	0.778066	0.720983	0.728257	0.817403	0.829946	0.73203	0.62415	0.723431	0.661235	0.759504	0.733041	0.735093
cg17447811	ADAD1	N_Shore	TSS1500;TSS1500;TSS1500	0.584998	0.76126	0.66827	0.732774	0.728167	0.689781	0.696449	0.683482	0.693148	0.570414	0.709155	0.616848	0.519884	0.681195	0.66203	0.697358	0.754814	0.651462
cg17756365	ADAD1	N_Shore	TSS1500;TSS1500;TSS200	0.861333	0.890582	0.86694	0.880812	0.876718	0.886889	0.859699	0.859809	0.872848	0.872837	0.852636	0.838622	0.79592	0.872059	0.865448	0.882295	0.867118	0.855867
cg18053768	ADAD1	N_Shore	5'UTR;1stExon;TSS1500;TSS1500	0.939585	0.947459	0.906616	0.938724	0.914156	0.949764	0.953682	0.947661	0.937206	0.920108	0.952775	0.933905	0.884326	0.938576	0.904653	0.940586	0.950185	0.928139
cg18286862	ADAD1	Island	5'UTR;TSS200;TSS200	0.956607	0.941802	0.947417	0.954751	0.952314	0.949832	0.963131	0.932618	0.949809	0.95685	0.930071	0.939219	0.916991	0.952267	0.926146	0.961414	0.928422	0.938922
cg19973673	ADAD1	N_Shore	TSS1500;TSS1500;1stExon;5'UTR	0.945656	0.953932	0.934587	0.945361	0.949473	0.956829	0.959969	0.953183	0.949874	0.95929	0.955783	0.946061	0.906458	0.955625	0.922291	0.949676	0.956165	0.943919
cg20456564	ADAD1	Island	5'UTR;TSS200;TSS200	0.815385	0.922073	0.863704	0.869538	0.822266	0.925139	0.895564	0.89864	0.876539	0.932044	0.935994	0.776313	0.769468	0.925171	0.889042	0.872176	0.845654	0.868233
cg24265000	ADAD1	N_Shore	TSS1500	0.894722	0.791846	0.813216	0.846725	0.881772	0.903139	0.893181	0.872673	0.862159	0.537655	0.897733	0.842842	0.679393	0.891568	0.703004	0.911492	0.913146	0.797104
cg26104711	ADAD1	N_Shore	TSS1500;TSS1500;TSS1500	0.467261	0.635399	0.616828	0.620755	0.511325	0.647903	0.481144	0.505046	0.560708	0.623427	0.459425	0.458206	0.636041	0.673957	0.514121	0.702258	0.54848	0.576989
	ADAD1											0.848614									0.823372
cg00225858	ADAD2	N_Shore	TSS1500;TSS1500	0.794995	0.880358	0.716557	0.828221	0.825294	0.818338	0.850566	0.879317	0.824206	0.864408	0.866203	0.797856	0.782037	0.812397	0.721333	0.810436	0.845399	0.812509
cg01705811	ADAD2	N_Shore	TSS1500;TSS1500	0.879534	0.852079	0.838602	0.84692	0.821119	0.827078	0.871196	0.821499	0.844753	0.547154	0.779496	0.82149	0.786187	0.814345	0.734078	0.876386	0.854041	0.776647
cg05711145	ADAD2	N_Shore	TSS200;TSS200	0.857153	0.857617	0.806112	0.863916	0.816801	0.815901	0.838412	0.877882	0.841724	0.857669	0.877141	0.813977	0.846071	0.828277	0.683233	0.786792	0.790741	0.810488
cg07732693	ADAD2	N_Shore	TSS1500;TSS1500	0.973645	0.974513	0.966968	0.967342	0.96873	0.976183	0.971602	0.971147	0.971266	0.973091	0.970107	0.971244	0.973971	0.969931	0.968095	0.9805	0.968884	0.971978
cg13081062	ADAD2	N_Shore	TSS1500;TSS1500	0.931364	0.953036	0.928317	0.941512	0.936898	0.951225	0.93461	0.940479	0.93968	0.874835	0.934959	0.926258	0.927239	0.9376	0.931617	0.936023	0.940815	0.926168
cg13200504	ADAD2	N_Shore	TSS200;TSS200	0.791367	0.838281	0.770984	0.860616	0.821474	0.85232	0.799359	0.821713	0.819514	0.904843	0.871992	0.822018	0.848727	0.854402	0.758505	0.812201	0.815161	0.835981
cg17561452	ADAD2	N_Shore	TSS200;TSS200	0.758023	0.875548	0.763535	0.823561	0.801146	0.795281	0.762652	0.822249	0.800249	0.872209	0.815492	0.742223	0.754174	0.826603	0.658427	0.706018	0.852162	0.778413
cg27059379	ADAD2	N_Shore	TSS200;TSS200	0.57662	0.634576	0.54037	0.677091	0.601621	0.613959	0.567356	0.651336	0.607866	0.594478	0.670619	0.55468	0.622322	0.655552	0.498625	0.559577	0.608021	0.595484
	ADAD2											0.831157									0.813459
cg02155558	ADAL	Island	TSS1500;1stExon;TSS1500	0.0870767	0.0673556	0.177335	0.194504	0.160375	0.197162	0.18143	0.154187	0.152428	0.237086	0.40679	0.345838	0.148351	0.134513	0.319143	0.310427	0.0617373	0.245486
cg03050687	ADAL	Island	TSS1500;1stExon;TSS1500	0.0102518	0.0138147	0.0113025	0.0124615	0.0121014	0.010073	0.00956178	0.0102848	0.0112314	0.0111214	0.0097126	0.0107593	0.0121342	0.0176465	0.0106223	0.00773769	0.010254	0.0112485
cg17120637	ADAL	Island	TSS200;TSS200;5'UTR;1stExon	0.0290267	0.0353813	0.0262583	0.0314973	0.0279151	0.0210927	0.0317451	0.0214087	0.0280406	0.0325161	0.0218576	0.0248538	0.031023	0.0424816	0.0258077	0.0151251	0.0298991	0.0279455
cg20114781	ADAL	Island	TSS1500;1stExon;TSS1500	0.00905	0.0135409	0.0125668	0.0128718	0.0132065	0.011424	0.00961753	0.0108212	0.0116373	0.016203	0.0143386	0.012977	0.0135659	0.0270065	0.0115146	0.00979987	0.0121794	0.0146981
cg20272507	ADAL	Island	TSS200;TSS200;5'UTR;1stExon	0.0203894	0.0175907	0.0201364	0.0211358	0.0208568	0.0195134	0.0174027	0.0188189	0.0194805	0.0131798	0.0219265	0.0211694	0.0190988	0.0235721	0.019543	0.0156745	0.0202416	0.0193007
cg25415508	ADAL	Island	TSS1500;1stExon;TSS1500	0.0589628	0.0563214	0.0532601	0.071089	0.0626499	0.0597513	0.0516824	0.0371424	0.0563574	0.12248	0.0452624	0.0580385	0.0744199	0.102267	0.0684596	0.0371657	0.0524243	0.0700647
cg26910465	ADAL	Island	TSS200;TSS200;1stExon	0.0327145	0.0352027	0.0290192	0.0348703	0.0252617	0.0347045	0.0617006	0.0238587	0.0346665	0.0883319	0.0162538	0.0228114	0.108764	0.0730492	0.0210578	0.0327876	0.0239097	0.0483707
cg26918442	ADAL	Island	TSS200;TSS200;5'UTR;1stExon	0.0245902	0.0250805	0.0296293	0.026007	0.026707	0.0181663	0.0248876	0.0205425	0.0244513	0.0476863	0.0215039	0.0212735	0.0316383	0.0388305	0.0277479	0.0148255	0.0205227	0.0280036
cg27139077	ADAL	Island	TSS200;TSS200;5'UTR;1stExon	0.0210581	0.0233326	0.0217673	0.0263919	0.0214665	0.0204848	0.0169794	0.0233746	0.0218569	0.0151231	0.0228162	0.0251875	0.0237616	0.0278473	0.0199689	0.0161042	0.0222073	0.021627
	ADAL											0.0400167									0.0540827
cg00435082	ADAM10	S_Shore	TSS200	0.0226335	0.0298451	0.0269493	0.0294984	0.0248411	0.0218157	0.0289244	0.0267003	0.026401	0.0224958	0.0254286	0.0270695	0.0273575	0.0297573	0.0255587	0.0163182	0.0249458	0.0248664
cg02971627	ADAM10	Island	TSS200	0.0560048	0.0442886	0.0311777	0.037699	0.0310632	0.0338631	0.0310252	0.032923	0.0372556	0.0621982	0.0244856	0.0302129	0.0401482	0.051419	0.032096	0.0362436	0.0313653	0.0385211
cg06253734	ADAM10	S_Shore	TSS200	0.0349708	0.0242381	0.0223047	0.0291628	0.0273309	0.0167766	0.0326394	0.0237644	0.0263985	0.0192949	0.0269826	0.02353	0.0388906	0.0295587	0.0230746	0.017947	0.0181354	0.0246767
cg08898775	ADAM10	S_Shore	TSS1500	0.320058	0.291743	0.499599	0.44386	0.442555	0.201476	0.359386	0.38492	0.36795	0.537195	0.202711	0.223564	0.289116	0.274152	0.22896	0.172795	0.210723	0.267402
cg15770593	ADAM10	S_Shore	TSS1500	0.0646497	0.0499371	0.0873501	0.0588775	0.0753033	0.0323027	0.0560705	0.0463066	0.0588497	0.0890561	0.0346619	0.0610981	0.0817844	0.0620678	0.0513676	0.0380681	0.0485787	0.0583353
cg20288868	ADAM10	S_Shore	TSS1500	0.0914369	0.0625548	0.0763774	0.0778561	0.062953	0.0648847	0.0746525	0.0629116	0.0717034	0.0865112	0.0601161	0.0742903	0.0681556	0.0764291	0.0535027	0.0669236	0.0601426	0.0682589
cg20532450	ADAM10	S_Shore	TSS1500	0.202185	0.218138	0.422565	0.316039	0.381911	0.144466	0.224431	0.256455	0.270774	0.427148	0.114328	0.163109	0.185914	0.282133	0.176642	0.0978481	0.194352	0.205184
cg21683678	ADAM10	Island	TSS200	0.0273084	0.0355199	0.0322906	0.0424305	0.0353809	0.0416152	0.0322869	0.0314955	0.034791	0.0364393	0.0340908	0.0323467	0.0262338	0.0498892	0.0368863	0.0268334	0.0300348	0.0340943
cg23535753	ADAM10	Island	TSS200	0.0359189	0.0371202	0.0424125	0.0413361	0.0469504	0.047416	0.0341305	0.0419133	0.0408997	0.0293371	0.0473071	0.0423848	0.0362409	0.0506834	0.0420136	0.0442425	0.0352244	0.0409292
	ADAM10											0.103891									0.0846965
cg06471905	ADAM11	N_Shore	TSS1500	0.354331	0.415798	0.301854	0.371243	0.357964	0.423787	0.408442	0.360182	0.3742	0.345557	0.473293	0.34519	0.339513	0.441362	0.314186	0.404722	0.392505	0.382041
cg20781461	ADAM11	Island	TSS1500	0.0467076	0.032913	0.0696613	0.0612106	0.0312485	0.0194857	0.0356427	0.0315251	0.0410493	0.0188731	0.0283168	0.0238986	0.0236146	0.0380497	0.028155	0.086045	0.0286799	0.0344541
cg26002784	ADAM11	N_Shore	TSS1500	0.0267173	0.0211069	0.0244061	0.0237199	0.0249679	0.024536	0.0145743	0.0168961	0.0221156	0.0235788	0.0166101	0.0186549	0.0162347	0.0352641	0.0213875	0.0141719	0.0179906	0.0204866
cg26022073	ADAM11	Island	TSS1500	0.0601243	0.0603413	0.050216	0.113893	0.122076	0.545726	0.048018	0.039642	0.130005	0.205474	0.459414	0.0334209	0.130548	0.083408	0.196807	0.315416	0.299232	0.215465
	ADAM11											0.141842									0.163112
cg02327997	ADAM12	Island	TSS200;TSS200	0.279124	0.225999	0.344486	0.308598	0.322273	0.434518	0.293396	0.303863	0.314032	0.48458	0.446306	0.342402	0.394874	0.278575	0.380928	0.374573	0.288778	0.373877
[truncated: 169,730 more rows]

## Sheet: Sheet2
Name	BPH	PCa	Difference	Methylation status
HPYR1	0.75262	0.502565	-0.250055	Hypomethylation
MIDN	0.272547	0.0362687	-0.236278	Hypomethylation
CT45A7	0.706702	0.486021	-0.220681	Hypomethylation
ARL15	0.294017	0.0851124	-0.208904	Hypomethylation
OR10Z1	0.781512	0.573259	-0.208253	Hypomethylation
SLC6A1	0.459812	0.259795	-0.200017	Hypomethylation
EFCAB4B	0.204707	0.407389	0.202682	Hypermethylation
GPRASP1	0.179548	0.382405	0.202857	Hypermethylation
ZNF655	0.179467	0.383206	0.203739	Hypermethylation
VWC2	0.184236	0.392705	0.208469	Hypermethylation
ADAMTS12	0.238692	0.449827	0.211135	Hypermethylation
TMEM106A	0.10308	0.31481	0.21173	Hypermethylation
CYBA	0.13745	0.350086	0.212636	Hypermethylation
HAAO	0.171658	0.388893	0.217235	Hypermethylation
SLFN11	0.120339	0.34025	0.219911	Hypermethylation
IGFBP7	0.124571	0.354682	0.230111	Hypermethylation
DUOX1	0.177511	0.417316	0.239805	Hypermethylation
C7orf60	0.110091	0.357477	0.247386	Hypermethylation
HES5	0.238923	0.486568	0.247645	Hypermethylation
ENPP2	0.161518	0.42059	0.259072	Hypermethylation
FAXDC2	0.224424	0.487933	0.26351	Hypermethylation
SMIM7	0.0197339	0.465553	0.445819	Hypermethylation
NKX6-3	0.303518	0.789088	0.485569	Hypermethylation

## Sheet: Sheet3
Name	BPH	PCa	Difference	Methylation status
SLC6A1	0.459812	0.259795	-0.200017	Hypomethylation
GPRASP1	0.179548	0.382405	0.202857	Hypermethylation
ZNF655	0.179467	0.383206	0.203739	Hypermethylation
ADAMTS12	0.238692	0.449827	0.211135	Hypermethylation
TMEM106A	0.10308	0.31481	0.21173	Hypermethylation
CYBA	0.13745	0.350086	0.212636	Hypermethylation
HAAO	0.171658	0.388893	0.217235	Hypermethylation
SLFN11	0.120339	0.34025	0.219911	Hypermethylation
IGFBP7	0.124571	0.354682	0.230111	Hypermethylation
DUOX1	0.177511	0.417316	0.239805	Hypermethylation
C7orf60	0.110091	0.357477	0.247386	Hypermethylation
ENPP2	0.161518	0.42059	0.259072	Hypermethylation
FAXDC2	0.224424	0.487933	0.26351	Hypermethylation

## Sheet: Sheet4
Name	BPH	PCa	Difference	Methylation status	P-Value
GPRASP1	0.179548	0.382405	0.202857	Hypermethylation	0.0002
ZNF655	0.179467	0.383206	0.203739	Hypermethylation	0.0015
ADAMTS12	0.238692	0.449827	0.211135	Hypermethylation	0.0041
TMEM106A	0.10308	0.31481	0.21173	Hypermethylation	0.0079
CYBA	0.13745	0.350086	0.212636	Hypermethylation	0.0001
HAAO	0.171658	0.388893	0.217235	Hypermethylation	0.0019
SLFN11	0.120339	0.34025	0.219911	Hypermethylation	<0.0001
IGFBP7	0.124571	0.354682	0.230111	Hypermethylation	<0.0001
DUOX1	0.177511	0.417316	0.239805	Hypermethylation	<0.0001
ENPP2	0.161518	0.42059	0.259072	Hypermethylation	0.0079
FAXDC2	0.224424	0.487933	0.26351	Hypermethylation	0.0070 (SAMPLE BASED)

## Sheet: Sheet5
						GPRASP1
cg09278708	GPRASP1	N_Shore	TSS1500;TSS1500;TSS1500	0.162066	0.113675	0.31129	0.294852	0.255918	0.713194	0.175288	0.186712	0.276624	0.530833	0.521015	0.512234	0.411004	0.283582	0.628924	0.572422	0.230681	0.461337
cg09332981	GPRASP1	N_Shore	TSS1500;TSS1500;TSS1500	0.566125	0.519261	0.59227	0.561824	0.6145	0.761614	0.535524	0.537477	0.586074	0.754719	0.687393	0.57444	0.578268	0.588389	0.65924	0.618248	0.584169	0.630608
cg18536496	GPRASP1	Island	TSS1500;TSS1500;TSS1500	0.0432884	0.0348538	0.0464738	0.0432006	0.0490923	0.46434	0.0353052	0.0433986	0.0949941	0.309357	0.3379	0.162775	0.177708	0.0894549	0.446981	0.277214	0.0403015	0.230211
cg04225046	GPRASP1	Island	TSS200;TSS200;TSS200	0.00968647	0.0124394	0.091488	0.0166176	0.0179371	0.610009	0.0138218	0.0399978	0.1015	0.421617	0.558642	0.0332453	0.39413	0.0512363	0.582578	0.478571	0.0417816	0.320225
cg12869615	GPRASP1	Island	TSS200;TSS200;TSS200	0.0835082	0.119062	0.0895948	0.0924426	0.132931	0.799303	0.103445	0.124967	0.193157	0.553898	0.686853	0.0618036	0.209314	0.115875	0.696307	0.672959	0.0846794	0.385211
cg15579650	GPRASP1	Island	TSS200;TSS200;TSS200	0.0364531	0.0242847	0.0288952	0.0407186	0.0312325	0.72899	0.0238269	0.0267345	0.117642	0.461958	0.566772	0.125117	0.303865	0.102859	0.690185	0.54953	0.0239068	0.353024
cg20207108	GPRASP1	Island	TSS200;TSS200;TSS200	0.0249789	0.0206795	0.0705085	0.0276943	0.0326601	0.722666	0.0239425	0.0301202	0.119156	0.56556	0.682933	0.0289234	0.506168	0.0628012	0.713005	0.612624	0.0280617	0.40001
cg24818939	GPRASP1	Island	TSS200;TSS200;TSS200	0.070313	0.0375771	0.0949276	0.0619395	0.0526057	0.786933	0.0334775	0.0464971	0.148034	0.539976	0.653486	0.0796621	0.338938	0.0487805	0.700464	0.63476	0.0372428	0.379164
cg06048710	GPRASP1	Island	TSS200;TSS200;TSS200;TSS200;5'UTR	0.0237406	0.0157383	0.026564	0.0219188	0.0203239	0.717466	0.0207715	0.0232622	0.108723	0.482089	0.616493	0.0241756	0.390449	0.0295162	0.670456	0.581324	0.0201676	0.351834
cg24232980	GPRASP1	Island	TSS200;TSS200;TSS200;TSS200;5'UTR	0.0706104	0.032008	0.0434481	0.0688123	0.0410969	0.873212	0.0377366	0.032888	0.149977	0.516203	0.656854	0.0415011	0.252175	0.0399619	0.756266	0.603792	0.0348583	0.362701
cg06048710	GPRASP1	Island	TSS200;TSS200;TSS200;TSS200;5'UTR	0.0237406	0.0157383	0.026564	0.0219188	0.0203239	0.717466	0.0207715	0.0232622	0.108723	0.482089	0.616493	0.0241756	0.390449	0.0295162	0.670456	0.581324	0.0201676	0.351834
cg24232980	GPRASP1	Island	TSS200;TSS200;TSS200;TSS200;5'UTR	0.0706104	0.032008	0.0434481	0.0688123	0.0410969	0.873212	0.0377366	0.032888	0.149977	0.516203	0.656854	0.0415011	0.252175	0.0399619	0.756266	0.603792	0.0348583	0.362701
						ZNF655
cg01598285	ZNF655	N_Shore	TSS1500;TSS1500;TSS1500;TSS1500	0.894624	0.914306	0.877826	0.891911	0.906858	0.914499	0.913264	0.89868	0.901496	0.901618	0.919093	0.874413	0.892157	0.888359	0.728803	0.897377	0.920886	0.877838
cg05165378	ZNF655	N_Shore	TSS1500;TSS1500;TSS1500;TSS1500;TSS1500;TSS1500;TSS1500;TSS1500	0.0420098	0.0604147	0.0537067	0.0523522	0.0514007	0.593025	0.0355769	0.0511366	0.117453	0.672719	0.477837	0.354217	0.458279	0.092235	0.401735	0.286852	0.132303	0.359522
cg05215729	ZNF655	N_Shore	TSS1500;TSS1500;TSS1500;TSS1500;TSS1500;TSS1500;TSS1500;TSS1500	0.0474083	0.0573798	0.111861	0.0964801	0.062444	0.487757	0.0673667	0.0629493	0.124206	0.526008	0.601981	0.451188	0.497287	0.168251	0.346116	0.490638	0.285665	0.420892
cg13636404	ZNF655	N_Shore	TSS1500;TSS1500;TSS1500;TSS1500;TSS1500;TSS1500;TSS1500;TSS1500	0.0429368	0.0213783	0.0176119	0.0274717	0.0314282	0.466049	0.0230531	0.0173638	0.0809116	0.39814	0.373144	0.26778	0.365432	0.0844192	0.37322	0.297493	0.183749	0.292922
cg21950525	ZNF655	N_Shore	TSS1500;TSS1500;TSS1500;TSS1500;TSS1500;TSS1500;TSS1500;TSS1500	0.0532019	0.050678	0.0536219	0.0520822	0.0595463	0.531921	0.0667203	0.0483976	0.114521	0.533415	0.293366	0.200205	0.281757	0.0683959	0.254666	0.244267	0.0790809	0.244394
cg01079658	ZNF655	Island	TSS200;TSS1500;TSS1500;TSS200;TSS1500;TSS200;TSS200;TSS1500	0.0817561	0.0489864	0.0666746	0.0754787	0.0783447	0.474396	0.0717604	0.0555514	0.119119	0.47157	0.413103	0.294574	0.438519	0.13794	0.411817	0.351519	0.230208	0.343656
cg07121182	ZNF655	Island	TSS200;TSS1500;TSS1500;TSS200;TSS1500;TSS200;TSS200;TSS1500	0.0184067	0.019946	0.0178866	0.024548	0.0203332	0.344545	0.015952	0.0212264	0.0603555	0.365668	0.240402	0.0705893	0.404313	0.071235	0.117757	0.294815	0.0743429	0.20489
cg07484673	ZNF655	Island	TSS200;TSS1500;TSS1500;TSS200;TSS1500;TSS200;TSS200;TSS1500	0.022311	0.0218777	0.0231716	0.027865	0.0232984	0.593791	0.0177669	0.0246925	0.0943468	0.518116	0.489291	0.350116	0.469256	0.124067	0.524905	0.483518	0.284965	0.405529
cg08024409	ZNF655	Island	TSS200;TSS1500;TSS1500;TSS200;TSS1500;TSS200;TSS200;TSS1500	0.0569732	0.0421151	0.0637456	0.0576329	0.0553315	0.219205	0.0480796	0.0320424	0.0718907	0.349442	0.316112	0.0968154	0.314139	0.1036	0.115083	0.275492	0.177702	0.218548
cg12457529	ZNF655	Island	TSS200;TSS1500;TSS1500;TSS200;TSS1500;TSS200;TSS200;TSS1500	0.0311355	0.0365117	0.0389097	0.0646384	0.0460098	0.607032	0.025618	0.0331201	0.110372	0.561992	0.543034	0.434913	0.517416	0.176373	0.605475	0.531484	0.340281	0.463871
						ADAMTS12
cg04124352	ADAMTS12	S_Shore	TSS1500	0.0641826	0.0767053	0.0796995	0.0561372	0.0772925	0.597545	0.108435	0.0640194	0.140502	0.543682	0.49691	0.381734	0.458645	0.14996	0.285432	0.425241	0.324471	0.383259
cg09747891	ADAMTS12	S_Shore	TSS1500	0.198843	0.299161	0.305202	0.272981	0.274081	0.113797	0.252994	0.203272	0.240041	0.546274	0.210889	0.125911	0.152261	0.211514	0.165509	0.135044	0.248316	0.224465
cg11731257	ADAMTS12	S_Shore	TSS1500	0.0834822	0.0916927	0.0864455	0.122198	0.142793	0.483354	0.0902738	0.0941161	0.149294	0.462583	0.416306	0.292571	0.43947	0.124651	0.250086	0.33908	0.241256	0.32075
cg15053460	ADAMTS12	Island	TSS200	0.0279326	0.0264245	0.0366087	0.035378	0.0316299	0.682555	0.0220424	0.0326375	0.111901	0.556986	0.586608	0.508368	0.515061	0.0492203	0.475387	0.528464	0.387978	0.451009
cg18519308	ADAMTS12	S_Shore	TSS1500	0.171652	0.390632	0.238367	0.301786	0.35229	0.799536	0.18326	0.262662	0.337523	0.813385	0.505911	0.54743	0.624348	0.331797	0.670949	0.540535	0.335127	0.546185
cg21264391	ADAMTS12	Island	TSS200	0.0565346	0.0443265	0.122324	0.083634	0.0586701	0.642548	0.0566077	0.0397606	0.138051	0.573083	0.611011	0.532204	0.559031	0.22447	0.534701	0.580815	0.472156	0.510934
cg23236370	ADAMTS12	S_Shore	TSS1500	0.46626	0.807086	0.521674	0.580066	0.70095	0.786326	0.51637	0.672984	0.631465	0.926634	0.749775	0.650339	0.758068	0.558702	0.724294	0.754048	0.718335	0.730024
cg25240047	ADAMTS12	Island	TSS200	0.0991144	0.0710841	0.0993835	0.0872844	0.0806958	0.831338	0.0547737	0.0522801	0.171994	0.647401	0.720404	0.602299	0.670228	0.157931	0.662883	0.745787	0.50908	0.589502
cg26093916	ADAMTS12	S_Shore	TSS1500	0.360087	0.499249	0.386886	0.404598	0.425644	0.278083	0.384769	0.336852	0.384521	0.470248	0.344631	0.345694	0.315623	0.343412	0.302285	0.355845	0.388866	0.358326
cg26573704	ADAMTS12	Island	TSS200	0.0675797	0.069249	0.127412	0.075438	0.0954705	0.605829	0.0681665	0.0610528	0.146275	0.500508	0.57103	0.450932	0.508464	0.188669	0.476464	0.511789	0.408399	0.452032
cg27288764	ADAMTS12	S_Shore	TSS1500	0.0981896	0.103428	0.120291	0.125478	0.184118	0.537387	0.120707	0.102756	0.174044	0.516976	0.490206	0.381694	0.460034	0.154542	0.359609	0.390208	0.299624	0.381612
						TMEM106A
cg03049782	TMEM106A	Island	TSS200	0.0647941	0.0310064	0.0265879	0.0352889	0.146406	0.46745	0.0689967	0.151553	0.12401	0.527853	0.409648	0.304525	0.430406	0.198523	0.368337	0.329031	0.201616	0.346242
cg15026277	TMEM106A	Island	TSS200	0.0263749	0.0223016	0.0263474	0.0301899	0.0516162	0.431937	0.0260761	0.0363455	0.0813986	0.374294	0.31844	0.177789	0.276525	0.0538645	0.295596	0.248229	0.116534	0.232659
cg19548479	TMEM106A	Island	TSS200	0.0274371	0.033339	0.032428	0.0380522	0.0813808	0.537929	0.0375991	0.0690679	0.107154	0.561949	0.507722	0.32607	0.432074	0.110051	0.347844	0.328878	0.173066	0.348457
cg21211480	TMEM106A	Island	TSS200	0.0266436	0.0233662	0.0256418	0.0251354	0.0461822	0.470013	0.0264551	0.0418361	0.0856592	0.406191	0.329927	0.215273	0.347725	0.0648752	0.350134	0.290522	0.11369	0.264792
cg24940138	TMEM106A	Island	TSS200	0.0376767	0.0318262	0.0400147	0.0376968	0.0795377	0.608305	0.0351398	0.0672322	0.117179	0.606054	0.466453	0.364883	0.481175	0.110364	0.444411	0.411892	0.169966	0.3819
						CYBA
cg03870138	CYBA	S_Shore	TSS1500	0.140823	0.0843892	0.0959865	0.138892	0.137147	0.439632	0.169535	0.103213	0.163702	0.443433	0.425065	0.253806	0.410416	0.213732	0.205521	0.429352	0.204565	0.323236
cg05744675	CYBA	S_Shore	TSS1500	0.0187073	0.0216208	0.0205171	0.020829	0.0270547	0.293279	0.0261339	0.0214863	0.0562035	0.182563	0.209324	0.0493318	0.246765	0.0632711	0.0599367	0.247769	0.0591849	0.139768
cg19790294	CYBA	S_Shore	TSS1500	0.0560449	0.0562209	0.0340026	0.048006	0.0540447	0.479891	0.139362	0.0313563	0.112366	0.42181	0.493866	0.249705	0.471318	0.242305	0.217478	0.423818	0.21545	0.341969
cg27176614	CYBA	S_Shore	TSS1500	0.327863	0.369971	0.270872	0.329927	0.31844	0.532898	0.411238	0.270705	0.353989	0.491558	0.476326	0.393062	0.463298	0.43064	0.354122	0.438654	0.356302	0.425495
cg00054525	CYBA	Island	TSS200	0.0200847	0.0318517	0.0265661	0.0364136	0.024494	0.608307	0.0766079	0.0267929	0.10639	0.290382	0.445612	0.334313	0.437156	0.206442	0.168447	0.49282	0.245511	0.327585
cg03125427	CYBA	Island	TSS200	0.0446632	0.0301429	0.0285959	0.030173	0.0355548	0.644254	0.0264702	0.0317562	0.108951	0.204857	0.582696	0.203954	0.533082	0.123799	0.194802	0.578565	0.342651	0.345551
cg08177833	CYBA	Island	TSS200	0.0151717	0.0212231	0.0132449	0.0137383	0.0185004	0.506987	0.0177998	0.0157165	0.0777977	0.181171	0.427195	0.265696	0.420061	0.175813	0.147185	0.441008	0.209464	0.283449
cg08843517	CYBA	Island	TSS200	0.0637619	0.0419646	0.0851492	0.0728055	0.0694492	0.649579	0.114757	0.0514304	0.143612	0.379926	0.6388	0.402092	0.570124	0.283735	0.336543	0.605183	0.453251	0.458707
cg09025501	CYBA	Island	TSS200	0.0139857	0.0147268	0.0149961	0.0136845	0.0145003	0.553956	0.0174005	0.0154021	0.0823315	0.187486	0.533582	0.255737	0.460451	0.165039	0.228315	0.514348	0.323255	0.333527
cg10246531	CYBA	S_Shore	TSS200	0.14863	0.119183	0.13029	0.172747	0.145019	0.606834	0.187168	0.0917239	0.200199	0.463943	0.510974	0.328751	0.567388	0.320142	0.295841	0.529979	0.253259	0.408785
cg14752986	CYBA	Island	TSS200	0.0313113	0.0351264	0.0288323	0.043787	0.0312814	0.589964	0.0787222	0.0246073	0.107954	0.467172	0.589056	0.491242	0.543552	0.29996	0.257635	0.533648	0.400057	0.44779
cg24046411	CYBA	S_Shore	TSS200	0.0533903	0.0695891	0.0556571	0.0609332	0.0597091	0.587064	0.144164	0.0567509	0.135907	0.417253	0.602735	0.263474	0.52628	0.223208	0.203935	0.461422	0.223071	0.365172
						HAAO
cg01561916	HAAO	Island	TSS1500	0.0566283	0.0444518	0.0428052	0.0509171	0.0548979	0.516363	0.0363139	0.0325093	0.104361	0.368317	0.456474	0.289798	0.423014	0.136248	0.450447	0.398096	0.223056	0.343181
cg05986933	HAAO	Island	TSS1500	0.104458	0.0881059	0.106606	0.155564	0.122509	0.52671	0.088311	0.098998	0.161408	0.37279	0.455426	0.320935	0.40446	0.204417	0.461407	0.429096	0.270884	0.364927
cg06913600	HAAO	S_Shore	TSS1500	0.303184	0.282719	0.376116	0.361112	0.338443	0.543095	0.357365	0.34289	0.363116	0.550031	0.48302	0.384766	0.495565	0.360197	0.472568	0.419456	0.398623	0.445528
cg09480054	HAAO	Island	TSS1500	0.0278494	0.0277845	0.0153891	0.0300445	0.0252349	0.481231	0.0276274	0.0174097	0.0815713	0.274771	0.373103	0.150779	0.356749	0.0813197	0.413795	0.343526	0.124536	0.264822
cg17246140	HAAO	Island	TSS1500	0.0708865	0.0300898	0.0441229	0.136518	0.0923011	0.505399	0.0518329	0.0335686	0.12059	0.299074	0.427531	0.290545	0.437986	0.16233	0.487601	0.461699	0.281506	0.356034
cg26360792	HAAO	Island	TSS1500	0.0371908	0.0469807	0.0274594	0.0734209	0.0632792	0.721811	0.0278864	0.0334509	0.128935	0.462635	0.506217	0.240184	0.575325	0.221576	0.67666	0.628676	0.26419	0.446933
cg27299406	HAAO	Island	TSS1500	0.0209224	0.0259833	0.0193155	0.0224578	0.0255127	0.667399	0.0150897	0.021594	0.102284	0.448749	0.58435	0.167872	0.478505	0.148275	0.615421	0.560786	0.302842	0.41335
cg08421126	HAAO	Island	TSS200	0.261092	0.271512	0.269802	0.27122	0.279156	0.575729	0.260698	0.298786	0.310999	0.475894	0.587899	0.308491	0.575504	0.337388	0.595969	0.601252	0.32858	0.476372
						SLFN11
cg00080081	SLFN11	S_Shore	TSS1500;TSS1500;TSS1500;TSS1500;TSS1500	0.353289	0.38852	0.276767	0.454702	0.325519	0.712987	0.319337	0.28358	0.389338	0.499661	0.608674	0.421134	0.492239	0.537975	0.565299	0.34595	0.394968	0.483238
cg03668718	SLFN11	Island	TSS1500;TSS1500;TSS1500;TSS1500;TSS1500	0.0410742	0.0357094	0.0361873	0.0418675	0.0387681	0.661489	0.0471974	0.0356395	0.117242	0.545667	0.54785	0.417022	0.456715	0.11755	0.648298	0.0558375	0.320101	0.38863
cg11309496	SLFN11	Island	TSS1500;TSS1500;TSS1500;TSS1500;TSS1500	0.045287	0.0295733	0.0311482	0.0413755	0.040808	0.65594	0.0269402	0.0274126	0.112311	0.50201	0.46807	0.404723	0.398785	0.0711295	0.615564	0.0479714	0.347356	0.356951
cg13341380	SLFN11	Island	TSS1500;TSS1500;TSS1500;TSS1500;TSS1500	0.0496184	0.0389226	0.0441162	0.0479703	0.0457237	0.506768	0.0902927	0.039212	0.107828	0.393027	0.404693	0.170528	0.192882	0.0767712	0.362324	0.0667835	0.219206	0.235777
cg18108623	SLFN11	Island	TSS1500;TSS1500;TSS1500;TSS1500;TSS1500	0.0767712	0.0508605	0.0708005	0.0712815	0.064648	0.579969	0.142182	0.0545046	0.138877	0.459499	0.507326	0.408947	0.463009	0.166828	0.510864	0.131917	0.317651	0.370755
cg01348733	SLFN11	Island	TSS200;TSS200;TSS200;TSS200;TSS200	0.0126798	0.024108	0.0195127	0.0578103	0.0389357	0.603868	0.0439619	0.0226589	0.102942	0.525338	0.462186	0.478375	0.468996	0.125715	0.459046	0.342509	0.209625	0.383974
cg05224998	SLFN11	N_Shore	TSS200;TSS200;TSS200;TSS200;TSS200	0.0430547	0.0345204	0.0299676	0.0427043	0.0359795	0.660633	0.030698	0.0325433	0.113763	0.595876	0.353137	0.3195	0.293818	0.0671449	0.461028	0.201598	0.148075	0.305022
cg10911913	SLFN11	N_Shore	TSS200;TSS200;TSS200;TSS200;TSS200	0.0258659	0.0271581	0.0254499	0.0314536	0.0279079	0.628716	0.0216373	0.0221463	0.101292	0.585077	0.362507	0.346977	0.301466	0.0681371	0.438128	0.302628	0.219649	0.328071
cg14380270	SLFN11	Island	TSS200;TSS200;TSS200;TSS200;TSS200	0.0212817	0.0212232	0.0209817	0.0330951	0.0262935	0.641455	0.0196808	0.0214855	0.100687	0.480213	0.442789	0.451197	0.458187	0.0861624	0.475584	0.29974	0.169229	0.357888
cg18608369	SLFN11	Island	TSS200;TSS200;TSS200;TSS200;TSS200	0.0151507	0.0151732	0.0157531	0.0195904	0.0179991	0.542066	0.0154738	0.0162631	0.0821837	0.421312	0.377802	0.388536	0.387714	0.0336691	0.366349	0.117912	0.0767001	0.271249
cg26573518	SLFN11	Island	TSS200;TSS200;TSS200;TSS200;TSS200	0.0120274	0.0193418	0.0152568	0.0307869	0.0314807	0.564788	0.0207548	0.0192974	0.0892167	0.439776	0.359246	0.446137	0.397714	0.0897171	0.413057	0.286289	0.19403	0.328246
cg01348733	SLFN11	Island	TSS200;TSS200;TSS200;TSS200;TSS200	0.0126798	0.024108	0.0195127	0.0578103	0.0389357	0.603868	0.0439619	0.0226589	0.102942	0.525338	0.462186	0.478375	0.468996	0.125715	0.459046	0.342509	0.209625	0.383974
cg05224998	SLFN11	N_Shore	TSS200;TSS200;TSS200;TSS200;TSS200	0.0430547	0.0345204	0.0299676	0.0427043	0.0359795	0.660633	0.030698	0.0325433	0.113763	0.595876	0.353137	0.3195	0.293818	0.0671449	0.461028	0.201598	0.148075	0.305022
cg10911913	SLFN11	N_Shore	TSS200;TSS200;TSS200;TSS200;TSS200	0.0258659	0.0271581	0.0254499	0.0314536	0.0279079	0.628716	0.0216373	0.0221463	0.101292	0.585077	0.362507	0.346977	0.301466	0.0681371	0.438128	0.302628	0.219649	0.328071
cg14380270	SLFN11	Island	TSS200;TSS200;TSS200;TSS200;TSS200	0.0212817	0.0212232	0.0209817	0.0330951	0.0262935	0.641455	0.0196808	0.0214855	0.100687	0.480213	0.442789	0.451197	0.458187	0.0861624	0.475584	0.29974	0.169229	0.357888
cg18608369	SLFN11	Island	TSS200;TSS200;TSS200;TSS200;TSS200	0.0151507	0.0151732	0.0157531	0.0195904	0.0179991	0.542066	0.0154738	0.0162631	0.0821837	0.421312	0.377802	0.388536	0.387714	0.0336691	0.366349	0.117912	0.0767001	0.271249
cg26573518	SLFN11	Island	TSS200;TSS200;TSS200;TSS200;TSS200	0.0120274	0.0193418	0.0152568	0.0307869	0.0314807	0.564788	0.0207548	0.0192974	0.0892167	0.439776	0.359246	0.446137	0.397714	0.0897171	0.413057	0.286289	0.19403	0.328246
						IGFBP7
cg00884221	IGFBP7	Island	TSS1500	0.0313288	0.0284317	0.0365854	0.072365	0.148283	0.530453	0.0265586	0.0347177	0.11359	0.505023	0.420947	0.235086	0.221132	0.0660492	0.354455	0.435214	0.25808	0.311998
cg08924554	IGFBP7	Island	TSS1500	0.108432	0.0705731	0.0978542	0.119792	0.178251	0.518334	0.0806566	0.0694685	0.15542	0.337778	0.423332	0.333536	0.264243	0.158921	0.44472	0.406405	0.261542	0.32881
cg19045644	IGFBP7	Island	TSS1500	0.0330573	0.0307369	0.0382542	0.0530379	0.192283	0.672466	0.0221114	0.0327247	0.134334	0.423795	0.552838	0.419717	0.372483	0.0743074	0.614572	0.566	0.332316	0.419504
cg20813965	IGFBP7	S_Shore	TSS1500	0.0401644	0.035852	0.0466268	0.0461282	0.10506	0.541076	0.0374182	0.0283449	0.110084	0.607503	0.428547	0.204222	0.30972	0.096174	0.341255	0.356822	0.226692	0.321367
cg03195531	IGFBP7	S_Shore	TSS1500;TSS1500;Body	0.0542458	0.0968278	0.0508155	0.11027	0.145932	0.527913	0.0779758	0.0484716	0.139056	0.406087	0.341019	0.279449	0.303766	0.135002	0.361089	0.343071	0.171885	0.292671
[truncated: 28 more rows]
