# Supplementary material
Source: Research Square preprint supplement (doi:10.21203/rs.3.rs-9621447/v1)
Supplement: Supplementary file 2 [file 9b20da10312d44f72982468c.pdf]

1 **Supplementary data**

2

3 **Table S1:** Clinical characteristics of discovery and validation cohorts.

4

| <b>Discovery Cohort (FFPE)</b>            |                  |                   |                     |            |                      |
|-------------------------------------------|------------------|-------------------|---------------------|------------|----------------------|
| <b>Sample Type</b>                        | <b>Sample ID</b> | <b>Age (yrs.)</b> | <b>Sample types</b> | <b>PSA</b> | <b>Gleason score</b> |
| <b>BPH*</b><br>(N = 8)                    | 22               | 72                | Biopsy              | 27.32      | NA                   |
|                                           | 74               | 56                | Biopsy              | 12.3       | NA                   |
|                                           | 75               | 61                | Biopsy              | 2.92       | NA                   |
|                                           | 81               | 55                | Biopsy              | 4.9        | NA                   |
|                                           | 102              | 77                | Biopsy              | 8          | NA                   |
|                                           | 103              | 80                | Biopsy              | 51.81      | NA                   |
|                                           | 106              | 65                | Biopsy              | 7.84       | NA                   |
|                                           | 119              | 60                | Biopsy              | 16.97      | NA                   |
| <b>PCa#</b><br>(N = 8)                    | 24               | 45                | Biopsy              | 149        | 4+4=8/10             |
|                                           | 70               | 73                | Biopsy              | 78.5       | 3+3=6/10             |
|                                           | 93               | 62                | Biopsy              | 57.08      | 3+3=6/10             |
|                                           | 131              | 71                | Biopsy              | 68.4       | 4+3=7/10             |
|                                           | 143              | 50                | Biopsy              | 162        | 3+4=7/10             |
|                                           | 180              | 78                | Biopsy              | 1777       | 3+4=7/10             |
|                                           | 187              | 65                | Biopsy              | 40.2       | 3+4=7/10             |
|                                           | 324              | 63                | Biopsy              | 4.46       | 3+4=7/10             |
| <b>Validation Cohort (Freshly frozen)</b> |                  |                   |                     |            |                      |
| <b>Sample Type</b>                        | <b>Sample ID</b> | <b>Age (yrs.)</b> | <b>Sample types</b> | <b>PSA</b> | <b>Gleason score</b> |
| <b>BPH*</b><br>(N = 8)                    | B1               | 76                | Biopsy              | 21.38      | NA                   |
|                                           | B3               | 67                | Biopsy              | 25         | NA                   |
|                                           | B4               | 68                | Biopsy              | 6.13       | NA                   |
|                                           | B6               | 70                | Biopsy              | 13.6       | NA                   |
|                                           | B7               | 70                | Biopsy              | 33.7       | NA                   |
|                                           | B8               | 69                | Biopsy              | 7.81       | NA                   |
|                                           | B9               | 65                | Biopsy              | 6.52       | NA                   |
|                                           | B10              | 80                | Biopsy              | 6.2        | NA                   |
| <b>PCa#</b><br>(N = 8)                    | PC1              | 83                | Biopsy              | 38.6       | 5+4=9/10             |
|                                           | PC2              | 54                | Biopsy              | 88         | 5+5=10/10            |
|                                           | PC3              | 67                | Biopsy              | 66.7       | 5+4=9/10             |
|                                           | PC4              | 62                | Biopsy              | 45         | 5+4=9/10             |
|                                           | PC5              | 60                | Biopsy              | 331.27     | 4+5=9/10             |
|                                           | PC6              | 79                | Biopsy              | 54.17      | 5+4=9/10             |
|                                           | PC7              | 77                | Biopsy              | 184        | 5+5=10/10            |
|                                           | PC10             | 65                | Biopsy              | 102        | 5+3=8/10             |

5 \* BPH: benign prostatic hyperplasia; #PCa: prostate cancer

6

7

8

9

10

11

12

13

14

15 **Table S2.** Previously published datasets used in this study.  
16

| Accession ID | Experiment                  | Target                  | Cell line/tissue samples |
|--------------|-----------------------------|-------------------------|--------------------------|
| GSE66039     | ChIP-Seq                    | 5-mC                    | LNCaP                    |
| GSE83860     |                             | AR                      | LNCaP                    |
| GSE117430    |                             | AR                      | LNCaP                    |
| GSE47987     |                             | AR                      | DU145                    |
| GSE43253     |                             | RNA Pol II              | LNCaP                    |
| GSE114737    |                             | H3K27ac                 | LNCaP                    |
| GSE94013     |                             | BRD4                    | 22RV1                    |
| GSE130408    |                             | H3K27ac                 | Prostate tissue samples  |
| GSE120742    |                             |                         |                          |
| GSE188173    |                             | AR                      | VCaP                     |
| GSE55062     |                             |                         |                          |
| GSE83653     |                             | RNA Pol II              | VCaP                     |
| GSE70079     |                             | AR                      | VCaP                     |
| GSE56086     |                             | AR                      | Prostate tissue samples  |
| GSE37345     |                             | FOXA1                   | VCaP                     |
| GSE146886    |                             | FOXA1                   | LNCaP                    |
| GSE57498     |                             | RNA Pol II              | 22RV1                    |
| GSE105290    |                             | H3K27ac                 | PrEC                     |
| GSE229871    |                             |                         | RWPE1                    |
| GSE205885    |                             | ATAC-Seq                | VCaP                     |
| GSE181294    | ScRNA-Seq                   | LNCaP                   |                          |
| GSE223024    | RNA-Seq                     | Prostate tissue samples |                          |
| GSE80741     |                             | LNCaP                   |                          |
| GSE71797     |                             | VCaP                    |                          |
| GSE95413     |                             | VCaP                    |                          |
| GSE139230    |                             | VCaP                    |                          |
| GSE250422    |                             | LNCaP                   |                          |
| GSE184168    |                             | LNCaP                   |                          |
| GSE80609     |                             | C4-2R                   |                          |
| GSE119757    |                             | Prostate tissue samples |                          |
| GSE193127    |                             | LNCaP                   |                          |
| GSE25346     |                             | VCaP                    |                          |
| GSE63196     |                             | Micro Array             | LNCaP                    |
| GSE38240     | DU145                       |                         |                          |
| GSE112047    | LNCaP                       |                         |                          |
| GSE62053     | 22RV1                       |                         |                          |
| GSE66872     | 450K Methylation EPIC Array | Prostate tissue samples |                          |
| GSE38240     |                             | LNCaP                   |                          |
| GSE112047    |                             | DU145                   |                          |

|          |                      |       |
|----------|----------------------|-------|
| GSE54758 |                      |       |
| GSE86832 | Bisulfite Sequencing | LNCaP |
| GSE42790 |                      | DU145 |

17  
18  
19  
20  
21  
22  
23  
24  
25  
26  
27  
28  
29  
30  
31  
32  
33  
34  
35  
36  
37  
38  
39  
40  
41  
42  
43  
44  
45  
46  
47  
48  
49  
50  
51  
52  
53  
54  
55  
56  
57  
58  
59  
60  
61  
62  
63  
64

65  
66

**Table S3:** Gene expressions in different prostate cell lines from DepMap portal.\*

| SI No | DepMap Id  | Cell Lines    | Lineage                                 | AR       | DUOX1    | DNM T1   | DNM T3A  | DNM T3B  | BRD 4    |
|-------|------------|---------------|-----------------------------------------|----------|----------|----------|----------|----------|----------|
| 1     | ACH-001627 | P4E6          | Immortalized Epithelial Cells, Prostate | 0        | 4.849409 | 5.81556  | 3.178413 | 2.781228 | 3.770797 |
| 2     | ACH-000170 | PRECLH        | Immortalized Epithelial Cells, Prostate | 0.021505 | 3.740021 | 7.021091 | 3.999928 | 3.22077  | 5.433888 |
| 3     | ACH-001648 | SHMAC4        | Immortalized Epithelial Cells, Prostate | 0        | 6.133463 | 4.687369 | 3.296983 | 1.587658 | 3.959844 |
| 4     | ACH-001649 | SHMAC5        | Immortalized Epithelial Cells, Prostate | 0.007607 | 6.179169 | 4.677948 | 3.39282  | 1.002292 | 3.952594 |
| 5     | ACH-001422 | WPE1NA22      | Immortalized Epithelial Cells, Prostate | 0        | 4.504747 | 5.274236 | 2.176904 | 0.463538 | 3.675172 |
| 6     | ACH-001453 | BPH1          | Hyperplasia, Prostate                   | 0.0039   | 5.908001 | 5.922971 | 2.197881 | 2.133748 | 4.232553 |
| 7     | ACH-000090 | PC3           | Prostate Adenocarcinoma                 | 0.010584 | 0.606528 | 6.458759 | 2.710874 | 1.286627 | 3.2946   |
| 8     | ACH-000979 | DU145         | Prostate Adenocarcinoma                 | 0        | 1.962941 | 4.598502 | 1.515919 | 0.626829 | 2.201452 |
| 9     | ACH-000977 | LNCAPCLONEFGC | Prostate Adenocarcinoma                 | 6.284431 | 1.223738 | 5.848595 | 4.13629  | 1.89815  | 4.708607 |
| 10    | ACH-000115 | VCAP          | Prostate Adenocarcinoma                 | 8.722278 | 0.227578 | 5.655767 | 4.56364  | 2.53859  | 5.299556 |
| 11    | ACH-000952 | MDAPCA2B      | Prostate Adenocarcinoma                 | 5.378213 | 0.478665 | 6.188312 | 3.342724 | 1.764057 | 4.891618 |
| 12    | ACH-000956 | 22RV1         | Prostate Adenocarcinoma                 | 7.589449 | 0.539633 | 6.694574 | 4.166049 | 2.468959 | 4.505688 |

\* RNA-Seq Log2 TPM+1 values were extracted from DepMap portal (<https://depmap.org/portal/>)

67  
68  
69  
70  
71  
72  
73  
74  
75  
76  
77

78 **Table S4.** Cell lines generated and used in this study.

79

| Cell lines                                                                     | Source                  | Identifier       |
|--------------------------------------------------------------------------------|-------------------------|------------------|
| LNCaP                                                                          | Obtained from ATCC, USA | Cat No. CRL-1740 |
| DU145                                                                          | Obtained from ATCC, USA | Cat No. HTB-81   |
| MyC-CaP                                                                        | Obtained from ATCC, USA | Cat No. CRL-3255 |
| Lenti-X 293T                                                                   | Takara Bio Inc.         | Cat No. 632180   |
| LNCaP stably expressing DNMT3A Sh-RNA                                          | This study              | N/A              |
| LNCaP stably expressing AR sgRNA#1                                             | This study              | N/A              |
| LNCaP stably expressing AR sgRNA#2                                             | This study              | N/A              |
| LNCaP stably expressing BRD4 sgRNA#1                                           | This study              | N/A              |
| LNCaP stably expressing BRD4 sgRNA#2                                           | This study              | N/A              |
| LNCaP stably expressing DUOX1-pLVX-TetOne-Puro lentiviral expression plasmid   | This study              | N/A              |
| MyC-CaP stably expressing DUOX1-pLVX-TetOne-Puro lentiviral expression plasmid | This study              | N/A              |
| LNCaP stably expressing pLX302_FOXA1-V5 lentiviral expression plasmid          | This study              | N/A              |
| LNCaP stably expressing FOXA1 sgRNA#1                                          | This study              | N/A              |

80

81

82

83

84

85

86

87

88

89

90

91

92

93

94

95

96

97

98

99

100

101

102

**Table S5.** Antibodies used in this study.

| <b>Antibodies</b>                                                             |                                          |                    |
|-------------------------------------------------------------------------------|------------------------------------------|--------------------|
| Anti-DUOX1 (H-9; Mouse monoclonal)                                            | Santa Cruz Biotechnology Inc.            | Cat No. sc-393096  |
| Anti-DUOX1 (Rabbit polyclonal)                                                | Invitrogen/Thermo Fisher Scientific      | Cat No. PA5-85452  |
| Anti-DUOX1 (3B8D6; Mouse monoclonal)                                          | Proteintech Group, Inc.                  | Cat No. 67226-1-Ig |
| Anti-Androgen Receptor ((D6F11) XP; Rabbit monoclonal) for ChIP-qPCR analysis | Cell Signaling Technology                | Cat No. 5153S      |
| Anti-Androgen Receptor (AR 441; Mouse monoclonal)                             | Invitrogen/Thermo Fisher Scientific      | Cat No. MA5-13426  |
| Anti-Androgen Receptor (AG17291; Rabbit polyclonal)                           | Proteintech Group, Inc.                  | Cat No. 22089-1-AP |
| Anti-GAPDH (6C5; Mouse monoclonal)                                            | Santa Cruz Biotechnology Inc.            | Cat No. sc32233    |
| Anti-GAPDH (Rabbit polyclonal)                                                | Company ABclonal, Inc                    | Cat No. AC027      |
| Anti- $\beta$ -Actin (Rabbit monoclonal)                                      | Company ABclonal, Inc                    | Cat No. AC026      |
| Anti-GFP (Rabbit polyclonal)                                                  | Abcam Ltd.                               | Cat No. ab290      |
| Anti-Flag (M2; Mouse monoclonal)                                              | Merck/Sigma-Aldrich                      | Cat No. F3165      |
| Anti-C-Myc Epitope (Myc Tag Polyclonal Antibody)                              | Cloud-Clone Corp                         | Cat No. TAX162Ge01 |
| Anti-DNMT1 (Rabbit polyclonal)                                                | Invitrogen/Thermo Fisher Scientific Inc. | Cat No. PA5-30581  |
| Anti-DNMT3A (EPR18455; Rabbit monoclonal)                                     | Abcam Ltd.                               | Cat No. ab188470   |
| Anti-DNMT3B (EPR3523 ; Rabbit monoclonal)                                     | Abcam Ltd.                               | Cat No. ab79822    |
| Anti-H3K27ac (Rabbit polyclonal) for ChIP-qPCR analysis                       | Abcam Ltd.                               | Cat No. ab4729     |
| Anti-BRD4 (14H4L4; Rabbit monoclonal)                                         | Invitrogen/Thermo Fisher Scientific Inc. | Cat No. PA5-30581  |
| Anti V5-Tag (Mouse monoclonal)                                                | Company ABclonal, Inc                    | Cat No. AE017      |
| Anti-FOXA1 (Rabbit polyclonal)                                                | Invitrogen/Thermo Fisher Scientific Inc. | Cat No. PA5-27157  |
| Anti-PARP1 (Rabbit monoclonal)                                                | ABclonal Inc.                            | Cat No. A19596     |
| Anti-Cleaved PARP (F21-852; Mouse monoclonal)                                 | BD Pharmingen                            | Cat No. 552596     |
| Anti-Caspase 3 (31A1067; Mouse monoclonal)                                    | Santa Cruz Biotechnology Inc.            | Cat No. sc-56053   |
| Caspase-9 Antibody (Rabbit polyclonal)                                        | Cell Signaling Technology                | Cat No. 9502S      |
| Anti-GPX4 (Rabbit polyclonal)                                                 | Company ABclonal, Inc                    | Cat No. A1933      |
| Anti-SOD2 (Rabbit polyclonal)                                                 | Company ABclonal, Inc                    | Cat No. A1340      |
| Anti-c-Myc antibody (clone 9E10)                                              | Sigma-Aldrich/ Merck                     | Cat No. MABE282    |
| Anti-Desmoplakin (Rabbit polyclonal)                                          | Cloud-Clone Corp                         | Cat No. PAC203Hu01 |

|                                                                   |                                          |                    |
|-------------------------------------------------------------------|------------------------------------------|--------------------|
| Anti-beta-catenin (E-5, Mouse monoclonal)                         | Santa Cruz Biotechnology Inc.            | Cat No. sc-7963    |
| Anti-Vimentin (Mouse monoclonal)                                  | Cloud-Clone Corp                         | Cat No. MAB040Hu21 |
| Anti-Snail Homolog 1 (Rabbit polyclonal)                          | Cloud-Clone Corp                         | Cat No. PAK089Hu01 |
| Rabbit IgG Isotype control                                        | Invitrogen/Thermo Fisher Scientific Inc. | Cat No. 02-6102    |
| Goat anti-Mouse IgG (H+L) Secondary Antibody, DyLight 680         | Invitrogen/Thermo Fisher Scientific Inc. | Cat No. 35518      |
| Goat anti-Mouse IgG (H+L) Secondary Antibody, DyLight 800 4X PEG  | Invitrogen/Thermo Fisher Scientific Inc. | Cat No. SA5-35521  |
| Goat anti-Rabbit IgG (H+L) Secondary Antibody, DyLight 800 4X PEG | Invitrogen/Thermo Fisher Scientific Inc. | Cat No. SA5-35571  |
| Goat anti-Rabbit IgG (H+L) Secondary Antibody, DyLight™ 680       | Invitrogen/Thermo Fisher Scientific Inc. | Cat No. 35568      |
| Goat anti-Rabbit IgG, Alexa Fluor 488                             | Invitrogen/Thermo Fisher Scientific      | Cat No. A-11008    |
| Goat anti-Mouse IgG, Alexa Fluor 488                              | Invitrogen/Thermo Fisher Scientific      | Cat No. A-11029    |
| Goat anti-Rabbit IgG, Alexa Fluor 568                             | Invitrogen/Thermo Fisher Scientific      | Cat No. A-11011    |
| Goat anti-Mouse IgG, Alexa Fluor 568                              | Invitrogen/Thermo Fisher Scientific      | Cat No. A-11004    |

105  
106  
107  
108  
109  
110  
111  
112  
113  
114  
115  
116  
117  
118  
119  
120  
121  
122  
123  
124  
125  
126  
127  
128

129  
130  
131

**Table S6.** Oligo sequences used for qPCR, cloning of Sh-RNAs, sgRNAs, cDNAs, promoter regions and CHIP-qPCR.

| Reagent or Resource                                                                          | Source            | Identifier |
|----------------------------------------------------------------------------------------------|-------------------|------------|
| <b>qRT-PCR oligonucleotides</b>                                                              |                   |            |
| GAPDH qRT-PCR<br>Fw- 5'- AATGAAGGGGTCATTGATGG -3'<br>Rv- 5'- AAGGTGAAGGTCGGAGTCAA -3'        | PMID:<br>38530845 | N/A        |
| B2M qRT-PCR<br>Fw- 5'- GAGGCTATCCAGCGTACTCCA -3'<br>Rv- 5'- CGGCAGGCATACTCATCTTTT -3'        | PMID:<br>38530845 | N/A        |
| DUOX1 qRT-PCR<br>Fw- 5'- AGCTCTGTGTCAAAGGGGTG -3'<br>Rv- 5'- GAATCTCCTGGGGAGGGTCT-3'         | This study        | N/A        |
| AR qRT-PCR<br>Fw- 5'- GGTGAGCAGAGTGCCCTATC -3'<br>Rv- 5'- GCAGTCTCCAAACGCATGTC -3'           | This study        | N/A        |
| DNMT1 qRT-PCR<br>Fw- 5'- ACAGCTTAACAGAAAAGGAATGTGT -3'<br>Rv- 5'- TGACTTTAGCCAGGTAGCCCTC -3' | This study        | N/A        |
| DNMT3A qRT-PCR<br>Fw- 5'- TGCCGGAACATTGAGGACAT -3'<br>Rv- 5'- CCACAGCAGATGGTGCAGTA -3'       | This study        | N/A        |
| DNMT3B qRT-PCR<br>Fw- 5'- TCGTGCAGGCAGTAGGAAAT -3'<br>Rv- 5'- GAAGCCATTTGTTCTCGGCTC -3'      | This study        | N/A        |
| BRD4 qRT-PCR<br>Fw- 5'- CAGTTGCGCCCAAAAAGGACC -3'<br>Rv- 5'- CTGTCGCTGGATGACTTGGC -3'        | This study        | N/A        |
| c-Myc qRT-PCR<br>Fw- 5'-AGTGGAAAACCAGCAGCCTC -3'<br>Rv- 5'-TTCTCCTCCTCGTCGCAGTA -3'          | This study        | N/A        |
| TP53 qRT-PCR<br>Fw- 5'- CTTCCCTGGATTGGCAGC -3'<br>Rv- 5'- TTTTCAAGGAGTAGTTTCCATAGGT -3'      | PMID:<br>38530845 | N/A        |
| CDKN1A qRT-PCR<br>Fw- 5'- ACAGCAGAGGAAGACCATGTG -3'<br>Rv- 5'- CGTTTGGAGTGGTAGAAATCTGTC -3'  | PMID:<br>38530845 | N/A        |
| UGT2B11 qRT-PCR<br>Fw- 5'- GTGGGCATTCCATTGTTTTT -3'<br>Rv- 5'- TTA CTGGTTGATCATGTTGAATTC -3' | PMID:<br>21679149 | N/A        |
| UGT2B28 qRT-PCR<br>Fw- 5'- ACCAGGATGGCTCTGAAGTG -3'<br>Rv- 5'- ACACCAGCACCTTTCCACAA -3'      | This study        | N/A        |
| CDH1 qRT-PCR<br>Fw- 5'- TGCCCAGAAAATGAAAAAGG -3'<br>Rv- 5'- GTGTATGTGGCAATGCGTTC -3'         | This study        | N/A        |
| CTNNA1 qRT-PCR<br>Fw- 5'- CTGGGAGGAGAGCTCATCA -3'<br>Rv- 5'- TTTCACTGTTTGCCTACAGCATTC -3'    | This study        | N/A        |
| CTNNB1 qRT-PCR                                                                               | This study        | N/A        |

|                                                                                                                                                                                                                                                         |                   |                                                                                                                                                       |
|---------------------------------------------------------------------------------------------------------------------------------------------------------------------------------------------------------------------------------------------------------|-------------------|-------------------------------------------------------------------------------------------------------------------------------------------------------|
| Fw- 5'- TGTTCTCAGATTTCTGGTTGTT -3'<br>Rv- 5'- CACTTTCTGAGATACCAGCC -3'                                                                                                                                                                                  |                   |                                                                                                                                                       |
| CLDN1 qRT-PCR<br>Fw- 5'- CGATGAGGTGCAGAAGATGA -3'<br>Rv- 5'- CATTGACTGGGGTCATAGGG -3'                                                                                                                                                                   | This study        | N/A                                                                                                                                                   |
| SOX2 qRT-PCR<br>Fw- 5'- GAGCTTTGCAGGAAGTTTGC -3'<br>Rv- 5'- GCAAGAAGCCTCTCCTTGAA -3'                                                                                                                                                                    | PMID:<br>24681955 | N/A                                                                                                                                                   |
| KLF4 qRT-PCR<br>Fw- 5'- GCAGCCACCTGGCGAGTCTG -3'<br>Rv- 5'- CCGCCAGCGTTATTCGGGG -3'                                                                                                                                                                     | PMID:<br>24681955 | N/A                                                                                                                                                   |
| NANOG qRT-PCR<br>Fw- 5'- ACCTGGCTGCCGTCTCTGG -3'<br>Rv- 5'- AGCAAAGCCTCCCAATCCCAAACA -3'                                                                                                                                                                | PMID:<br>24681955 | N/A                                                                                                                                                   |
| <b>Cloning oligonucleotides</b>                                                                                                                                                                                                                         |                   |                                                                                                                                                       |
| pLVX-TetOne-Puro-DUOX1 cloning primers<br>Fw- 5'- AATGAGAATTCATGGGCTTCTGCCTGGCTC -3'<br>Rv- 5'- TATAAGGATCCCTAGAAGTTCTCATAATGGTGGG -3'                                                                                                                  | This study        | N/A                                                                                                                                                   |
| sg-AR#1<br>Fw- 5'-CACCGGTCCCTGGCAGTCTCCAAAC-3'<br>Rv- 5'-AAACGTTTGGAGACTGCCAGGGACC-3'                                                                                                                                                                   | This study        | <a href="https://www.synthego.com/products/bioinformatics/crispr-design-tool">https://www.synthego.com/products/bioinformatics/crispr-design-tool</a> |
| sg-AR#2<br>Fw- 5'-CACCGTTTCCAGTTTGGAGACTGCC -3'<br>Rv- 5'-AAACGGCAGTCTCCAACTGGAAAC -3'                                                                                                                                                                  | This study        | <a href="https://www.synthego.com/products/bioinformatics/crispr-design-tool">https://www.synthego.com/products/bioinformatics/crispr-design-tool</a> |
| sg-BRD4#1<br>Fw- 5'- CACCGTGGGATCACTAGCATGTCTG -3'<br>Rv- 5'- AAACCAGACATGCTAGTGATCCCAC -3'                                                                                                                                                             | This study        | <a href="https://www.synthego.com/products/bioinformatics/crispr-design-tool">https://www.synthego.com/products/bioinformatics/crispr-design-tool</a> |
| sg-BRD4#2<br>Fw- 5'- CACCGACTAGCATGTCTGCGGAGAG -3'<br>Rv- 5'- AAACCTCTCCGACAGACATGCTAGTC -3'                                                                                                                                                            | This study        | <a href="https://www.synthego.com/products/bioinformatics/crispr-design-tool">https://www.synthego.com/products/bioinformatics/crispr-design-tool</a> |
| sg-FOXA1#1<br>Fw- 5'- CACCGGGTTCATGGCGGCCGCGTAG -3'<br>Rv- 5'- AAACCTACGCGGCCCCATGAACCC -3'                                                                                                                                                             | This study        | <a href="https://www.synthego.com/products/bioinformatics/crispr-design-tool">https://www.synthego.com/products/bioinformatics/crispr-design-tool</a> |
| Sh-DNMT3A<br>Fw-5'-<br>TCGAGTGCTGTTGACAGTGAGCGActactacatcagcaagcgcaaTAGTGAAGCCACAGATGTAttgcttgctgatgtagtagGTGCCTACTGCCTCGGAA -3'<br>Rv-5'-<br>CGCGTTCCGAGGCAGTAGGCACctactacatcagcaagcgcaaTACATCTGTGGCTTCACTAttgcttgctgatgtagtagTCGCTCACTGTCAACAGCAC -3' | This study        | N/A                                                                                                                                                   |
| pGL3-DUOX1 AR pos cloning primers<br>Fw- 5'- CCGAGCTTACGCGTCTGGCCAGCTGCCTGCAG -3'<br>Rv- 5'- TGCAGATCGCAGATCTCATGCTCATATCACTTCT -3'                                                                                                                     | This study        | N/A                                                                                                                                                   |
| pGL3-DUOX1 AR neg cloning primers                                                                                                                                                                                                                       | This study        | N/A                                                                                                                                                   |

|                                                                                                                                                                        |            |     |
|------------------------------------------------------------------------------------------------------------------------------------------------------------------------|------------|-----|
| Fw- 5'- CCGAGCTCTTACGCGTCACCTGGACAGACTCTGTG -3'<br>Rv- 5'- TGCAGATCGCAGATCTCATGCCCAACCAGAAGTG -3'                                                                      |            |     |
| pGL3- DUOX1_ARE_mut cloning<br>Assembly PCR overlapped primers<br>Fw- 5'- AGAAGTAATCTATGCTTTCTTGCACCGATGTTTAAGC -3'<br>Rv- 5'- GCATAGATTACTTCTAAGTCAAGGACCTTCTATAC -3' | This study | N/A |
| pA3F-AR cloning primers<br>Fw- 5'- AATTGCCAGGATCCATGGAAGTGCAGTTAGGGC -3'<br>Rv- 5'-<br>AAGGAAAAAAGCGGCCCGCCTGGGTGTGGAAATAGATG -3'                                      | This study | N/A |
| pA3F-ARΔDBD cloning<br>Assembly PCR overlapped primers<br>Fw- 5'- CATTGACTATTACTTTCCAGGGATGACTCTGGGAGC -3'<br>Rv- 5- GCTCCCAGAGTCATCCCTGGAAAGTAATAGTCAATG -3'          | This study | N/A |
| pA3F-DNMT3A cloning primers<br>Fw- 5'- CCGGAATTCATGCCCGCCATGCCCTCC -3'<br>Rv- 5- AAGGAAAAAAGCGGCCCGCCACACACGCAAATACTC -3'                                              | This study | N/A |
| <b>ChIP oligonucleotides</b>                                                                                                                                           |            |     |
| (AR/ BRD4/ H3K27ac/ FOXA1)-DUOX1_pos binding ChIP primer set 1 (site 1)<br>Fw- 5'- CCTCCTGAGTGGGTATAGAAGGT -3'<br>Rv- 5'- AGGGTGTAACAGCTGACTCC -3'                     | This study | N/A |
| (AR/ BRD4/ H3K27ac/ FOXA1)-DUOX1_pos binding ChIP primer set 2 (site 2)<br>Fw- 5'- GCATCTATTGTTTGCTAGGCAC -3'<br>Rv- 5'- GCAAGAAAGCACAGATTGTTCC -3'                    | This study | N/A |
| AR-DUOX1_negative binding ChIP primers (NB site )<br>Fw- 5'- CCCAACACCTGTCACTTGCT -3'<br>Rv- 5'- CCTCTTCCAGCTATGGGAGC -3'                                              | This study | N/A |
| DNMTs-DUOX1_pos binding ChIP primer set 1 (site 1)<br>Fw- 5'- AGAGGCGGAGGGTGGGAGAG -3'<br>Rv- 5'- GCCCGCGTCACCCCGCCCT -3'                                              | This study | N/A |
| DNMTs-DUOX1_pos binding ChIP primer set 2 (site 2)<br>Fw- 5'- TCATCATGGCCCCAGACGGT -3'<br>Rv- 5'- GGAGATTCTGGGGCCTCAGT -3'                                             | This study | N/A |
| AR-KLK2_pos binding ChIP primers (site 1)<br>Fw- 5'- AGCAAACCTTGCCAGTC-3'<br>Rv- 5'- GTATCGCCTTCAGATCTAG -3'                                                           | This study | N/A |
| AR-UGT2B28_pos binding ChIP primers<br>Fw- 5'- GGGTACTTGCAAGGTCATTAA -3'<br>Rv- 5'- CATAACTCCTTCAATCCAAAGT -3'                                                         | This study | N/A |

132  
133  
134  
135  
136  
137  
138

139 **Table S7.** Plasmids generated and used in this study.

| <b>Recombinant Plamids</b>       | <b>Source</b>                                            | <b>Identifiers</b> |
|----------------------------------|----------------------------------------------------------|--------------------|
| pA3F (Empty vector)              | Gift from Erle S Robertson (University of Pennsylvania), | PMID: 22438805     |
| pEGFP-C1 (Empty vector)          | Clontech laboratories, Inc                               | Cat No. 632470     |
| pGIPZ-sh-Control                 | Gift from Erle S Robertson (University of Pennsylvania)  | PMID: 38530845     |
| pGIPZ-sh-DNMT3A                  | Gift from Erle S Robertson (University of Pennsylvania)  | N/A                |
| pA3F-DNMT3A                      | This study                                               | N/A                |
| pcDNA3/Myc-DNMT3B1               | Addgene                                                  | Cat No. 35522      |
| psPAX2                           | Addgene                                                  | Cat No. 12260      |
| pMDG                             | Addgene                                                  | Cat No. 187440     |
| pEGFP-C1-AR                      | Addgene                                                  | Cat No. 28235      |
| pA3F-AR                          | This study                                               | N/A                |
| pGL3 Promoter Vector             | Addgene                                                  | Cat No. 212939     |
| pGL3 Promoter-DUOX1 reg-WT       | This study                                               | N/A                |
| pGL3 Promoter-DUOX1 reg-Mut      | This study                                               | N/A                |
| pGL3 Promoter-DUOX1 reg-Neg      | This study                                               | N/A                |
| pA3F-ARΔDBD                      | This study                                               | N/A                |
| pSpCas9(BB)-2A-Puro (PX459) V2.0 | Addgene                                                  | Cat No. 62988      |
| PX459 V2.0-sgAR-1                | This study                                               | N/A                |
| PX459 V2.0-sgAR-2                | This study                                               | N/A                |
| PX459 V2.0-sgBRD4-1              | This study                                               | N/A                |
| PX459 V2.0-sgBRD4-2              | This study                                               | N/A                |
| PX459 V2.0-sgFOXA1-1             | This study                                               | N/A                |
| pLX302_FOXA1-V5                  | Addgene                                                  | Cat No. 70090      |
| pLVX-TetOne-Puro                 | Takara Bio Inc.                                          | Cat No. 631849     |
| pCMV3-DUOX1                      | Sino Biological, Inc.                                    | Cat No. HG18937-UT |
| pLVX-TetOne-Puro-DUOX1           | This study                                               | N/A                |

140  
141  
142  
143  
144  
145  
146  
147  
148  
149  
150  
151  
152  
153  
154  
155  
156  
157  
158

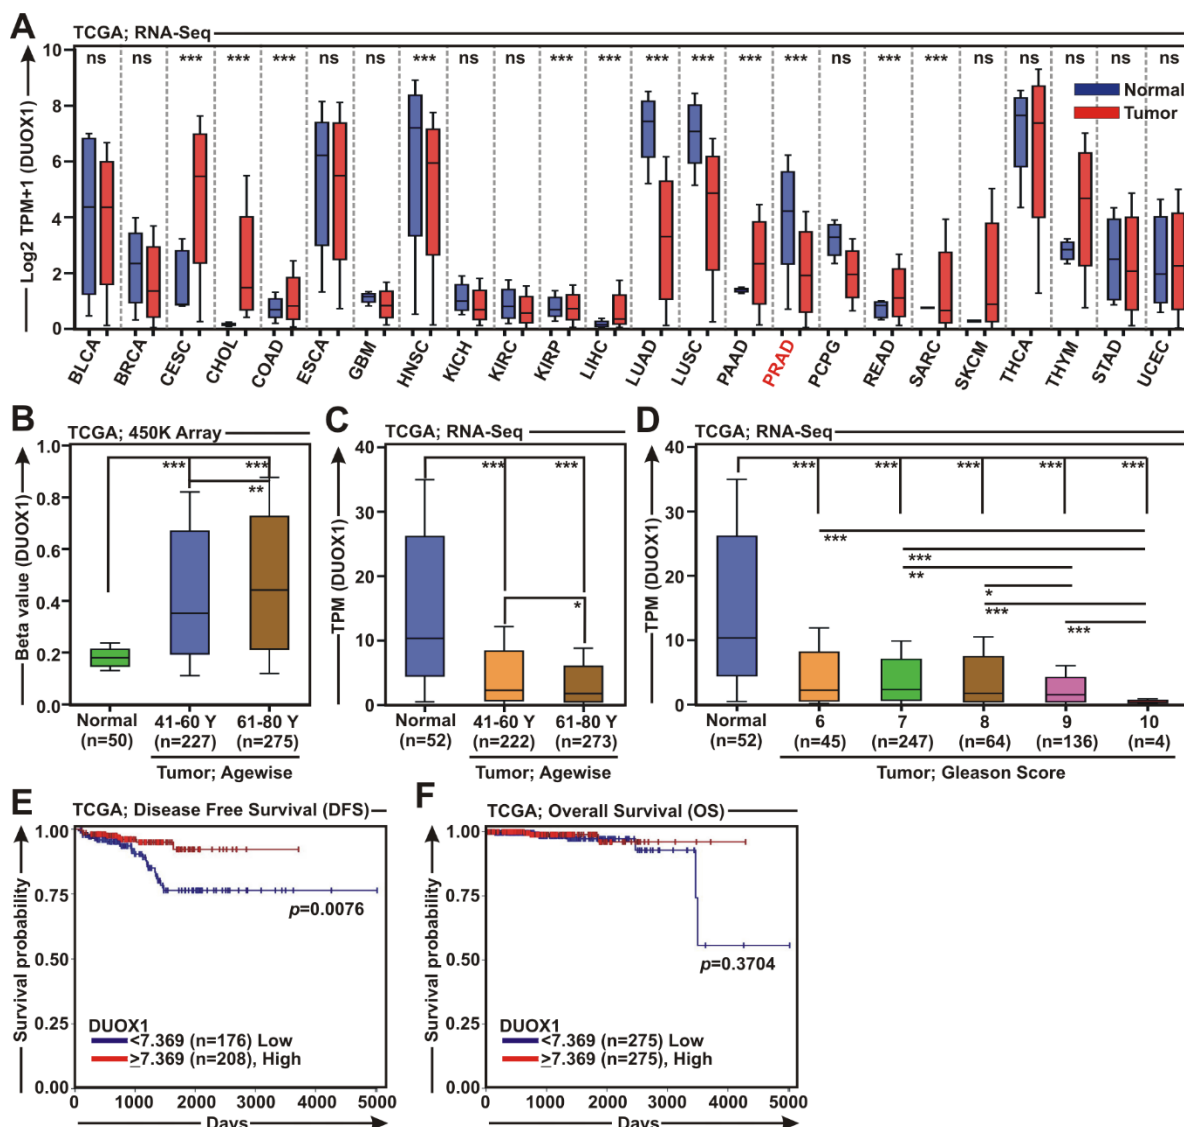

161  
162  
163 **Figure S1.** Promoter hypermethylation is associated with depletion of DUOX1 expression in TCGA-  
164 PRAD patient samples. **(A)** Box plots showing DUOX1 mRNA expression across 24 tumor types and  
165 matched normal tissues in the TCGA RNA-Seq dataset. **(B)** Box plot showing DUOX1 promoter  
166 methylation in normal and tumor samples across increasing patient age groups in the TCGA-PRAD  
167 450K methylation dataset. **(C, D)** Box plots depicting DUOX1 expression in normal and tumor samples  
168 stratified by increasing (C) patient age and (D) Gleason score in the TCGA-PRAD RNA-Seq dataset. **(E,**  
169 **F)** Kaplan-Meier plots showing (E) disease-free survival (DFS) and (F) overall survival (OS) of patients  
170 stratified based on high versus low DUOX1 expression. Significant differences were shown (\* $p < 0.05$ ;  
171 \*\*  $p < 0.01$ ; \*\*\*  $p < 0.001$ ; ns, not significant).

172  
173  
174  
175  
176  
177  
178  
179

180 Figure S2  
181

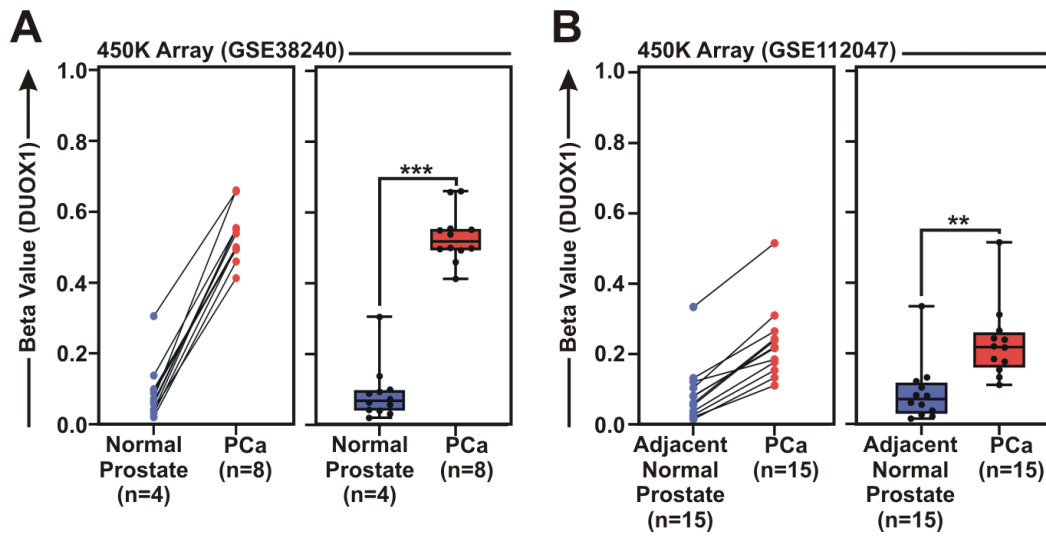

182  
183  
184 **Figure S2.** Reanalysis of 450K methylation array datasets in normal and PCa tissues. **(A, B)** Line and  
185 box plots showing DUOX1 promoter methylation in normal and primary PCa samples from two 450K  
186 methylation datasets (GSE38240 and GSE112047). Significant differences were shown (\*\* $p < 0.01$ ;  
187 \*\*\* $p < 0.001$ ).

188  
189  
190  
191  
192  
193  
194  
195  
196  
197  
198  
199  
200  
201  
202  
203  
204  
205  
206  
207  
208  
209  
210  
211  
212  
213  
214  
215  
216  
217

218 **Figure S3**

219

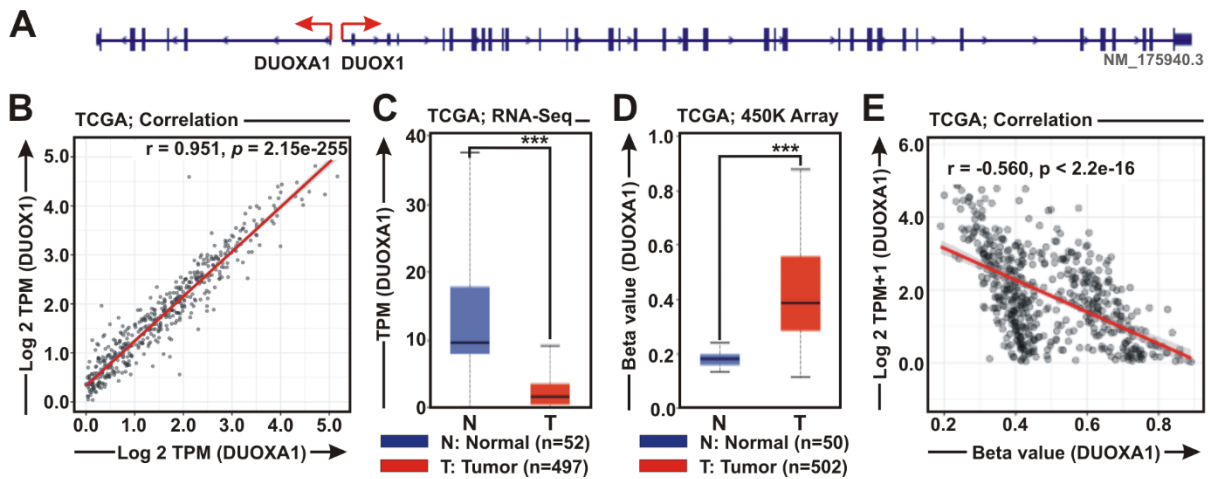

220

221

222 **Figure S3.** Expression of DUOX1 and its maturation factor DUOX1 are coordinately regulated by  
 223 promoter hypermethylation in PRAD. **(A)** Genome tracks illustrating the bidirectional organization of  
 224 DUOX1 and DUOX1 genes at chromosome 15q15-21. **(B)** Pearson correlation analysis between  
 225 DUOX1 and DUOX1 expressions in TCGA-PRAD samples. **(C)** RNA-Seq analysis showing DUOX1  
 226 expression in normal and tumor samples from the TCGA-PRAD dataset. **(D)** 450K methylation array  
 227 data showing DUOX1 promoter methylation levels in normal and tumor samples from the TCGA-  
 228 PRAD dataset. **(E)** Pearson correlation analysis between DUOX1 promoter methylation and gene  
 229 expression in the TCGA-PRAD dataset. Significant differences were shown (\*\*\*)  $p < 0.001$ .

230

231

232

233

234

235

236

237

238

239

240

241

242

243

244

245

246

247

248

249

250

251

252

253

254

255

256

257 **Figure S4**  
 258

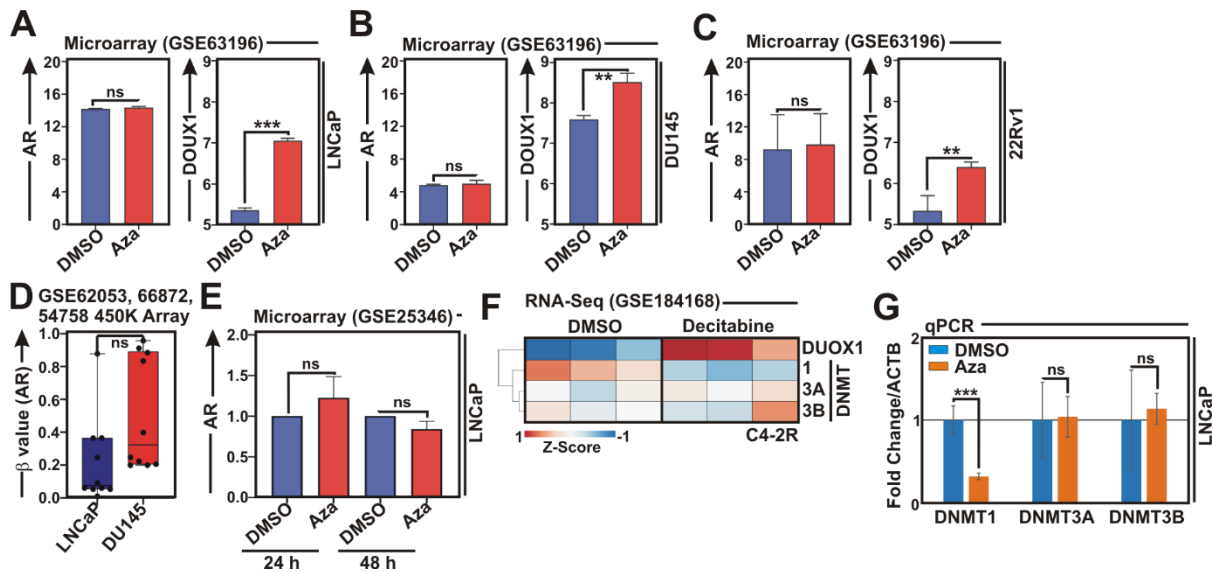

259  
 260  
 261  
 262 **Figure S4.** Demethylation restores DUOX1 expression in PCa cells. **(A-C)** Reanalysis of microarray data  
 263 (GSE63196) showing AR and DUOX1 transcript levels in (A) LNCaP, (B) DU145, and (C) 22Rv1 cells  
 264 following azacytidine (Aza) treatment. **(D)** 450K methyl array data (GSE62053, GSE66872 and  
 265 GSE54758) showing AR promoter-methylation levels in LNCaP and DU145 cells. **(E)** Reanalysis of  
 266 microarray data (GSE25346) showing AR expression in LNCaP cells upon Aza treatment for 24-48 h. **(F)**  
 267 Heatmap showing relative mRNA expression of DUOX1 and DNMT members in RNA-Seq datasets of  
 268 C4-2R cells with or without decitabine treatment. **(G)** qPCR showing mRNA expression profile of DNMT  
 269 members in LNCaP cells with or without Aza treatment. Data were presented as the mean  $\pm$  SD,  $n \geq 3$   
 270 biological replicates. Significant differences were shown (\*\* $p < 0.01$ ; \*\*\*  $p < 0.001$ ; ns, not significant).

271  
 272  
 273  
 274  
 275  
 276  
 277  
 278  
 279  
 280  
 281  
 282  
 283  
 284  
 285  
 286  
 287  
 288  
 289  
 290  
 291  
 292  
 293

294 **Figure S5**  
295

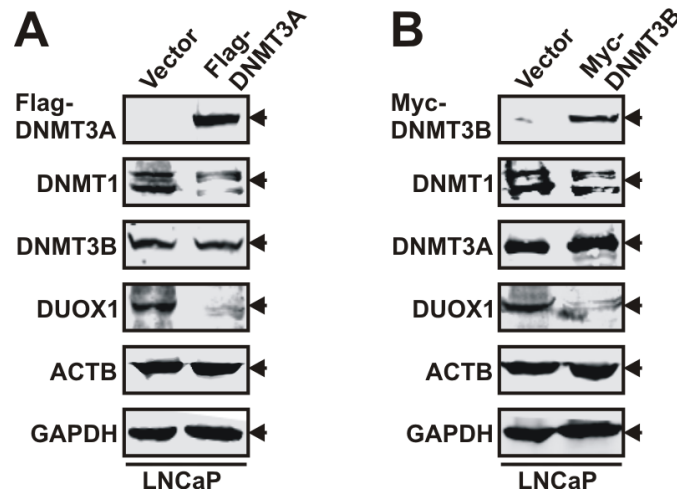

296  
297

298 **Figure S5.** Ectopic expression of DNMT3A and DNMT3B reduces DUOX1 expression. **(A, B)** Western  
299 blot analyses of whole cell lysate from LNCaP cells transiently transfected with (A) flag-tagged  
300 DNMT3A or (B) myc-tagged DNMT3B expression plasmids.

301  
302  
303  
304  
305  
306  
307  
308  
309  
310  
311  
312  
313  
314  
315  
316  
317  
318  
319  
320  
321  
322  
323  
324  
325  
326  
327  
328  
329  
330  
331  
332

333 Figure S6  
 334

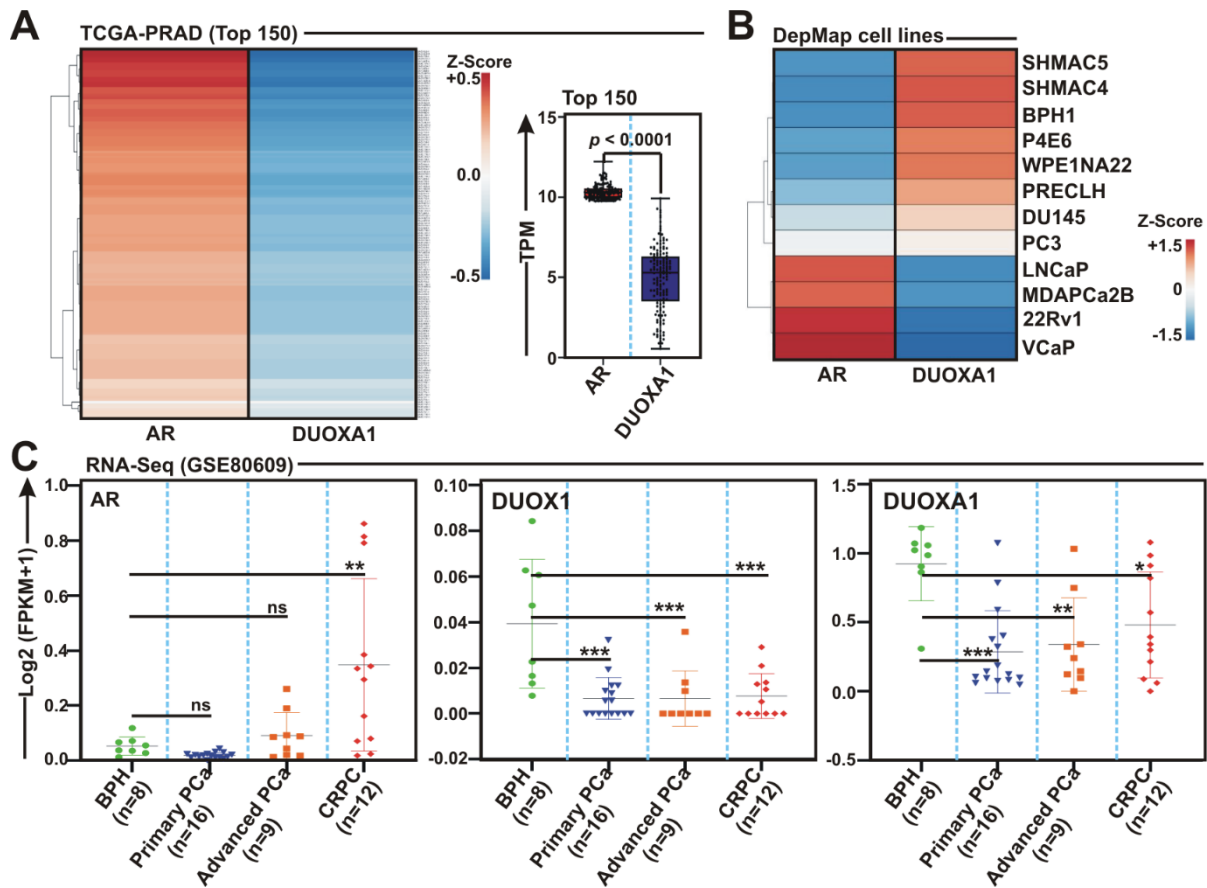

335  
 336  
 337 **Figure S6. AR is negatively correlated with both DUOX1 and DUOX1A1 expressions.** (A) Heatmap  
 338 showing RNA-Seq expression profiles of AR and DUOX1A1 in primary PCa samples from the TCGA-PRAD  
 339 dataset (top 150 samples with high AR expression). The corresponding box plot (right) illustrates the  
 340 inverse correlation between AR and DUOX1A1 expression. (B) Heatmap showing DUOX1A1 expression  
 341 in DepMap prostate cell lines (n = 12), stratified based on AR expression levels. (C) Dot plots of RNA-  
 342 Seq data (GSE80609) from BPH, primary PCa, advanced PCa, and CRPC samples showing mRNA  
 343 expression profiles of AR, DUOX1, and DUOX1A1. Significant differences were shown (\* $p < 0.05$ ; \*\*  $p <$   
 344  $0.01$ ; \*\*\*  $p < 0.001$ ; ns, not significant).

345  
 346  
 347  
 348  
 349  
 350  
 351  
 352  
 353  
 354  
 355  
 356  
 357  
 358  
 359  
 360

361 **Figure S7**  
 362

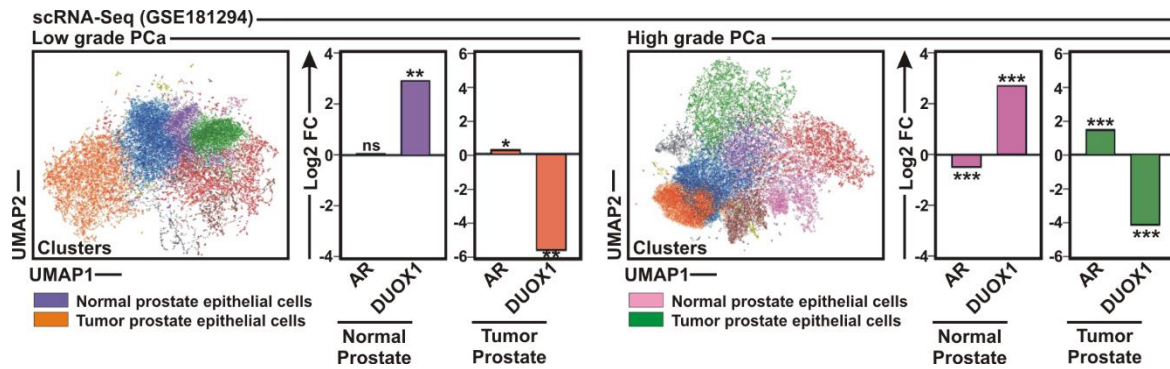

363  
 364

365 **Figure S7. Single-cell RNA-seq analysis reveals an inverse correlation between AR and DUOX1**  
 366 **expression in prostate epithelial cells.** UMAP (left) and bar (right) plots showing an inverse  
 367 relationship between AR and DUOX1 expression in both normal and tumor epithelial cell populations  
 368 derived from scRNA-Seq data (GSE181294) of two PCa samples. Significant differences were shown  
 369 (\* $p < 0.05$ ; \*\* $p < 0.01$ ; \*\*\* $p < 0.001$ ; ns, not significant).

370  
 371  
 372  
 373  
 374  
 375  
 376  
 377  
 378  
 379  
 380  
 381  
 382  
 383  
 384  
 385  
 386  
 387  
 388  
 389  
 390  
 391  
 392  
 393  
 394  
 395  
 396  
 397  
 398  
 399  
 400  
 401  
 402  
 403

404 Figure S8  
405

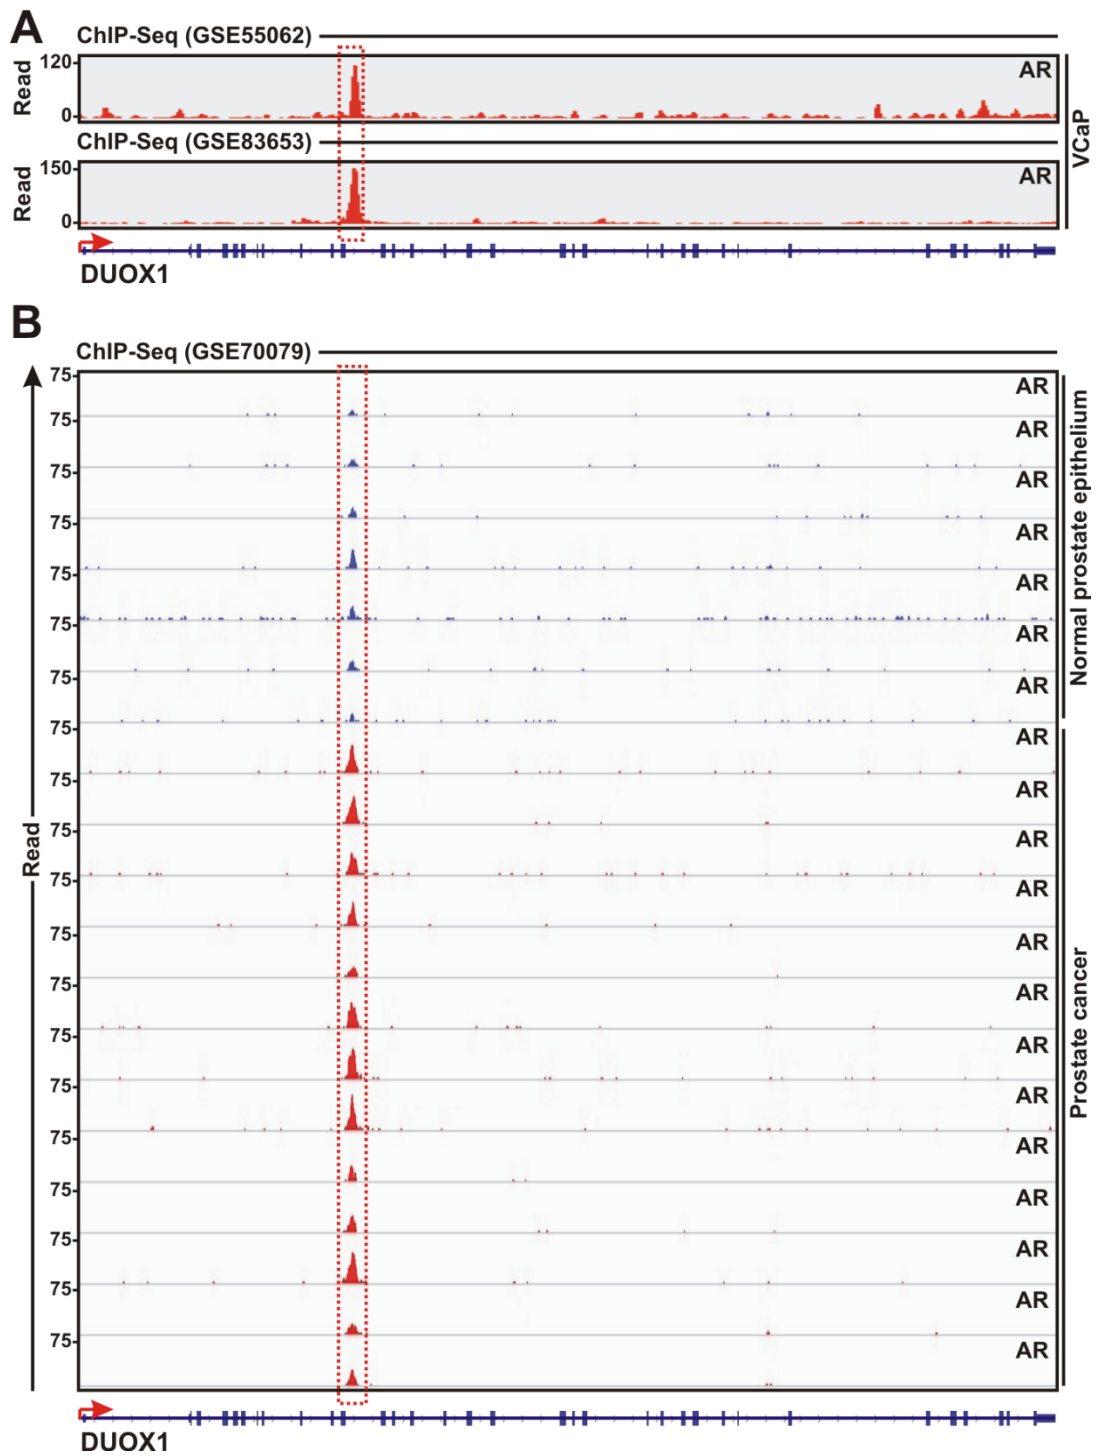

406  
407  
408  
409  
410  
411  
412  
413  
414  
415

**Figure S8.** ChIP-Seq analysis reveals AR occupancy at the DUOX1 enhancer region. **(A)** ChIP-Seq tracks (GSE55062, GSE83653) in VCaP cells showing AR binding at an intragenic enhancer region within the DUOX1 locus. **(B)** ChIP-Seq tracks (GSE70079) showing increased AR occupancy at the DUOX1 locus in prostate cancer compared to normal prostate epithelial cells.

416 **Figure S9**  
 417

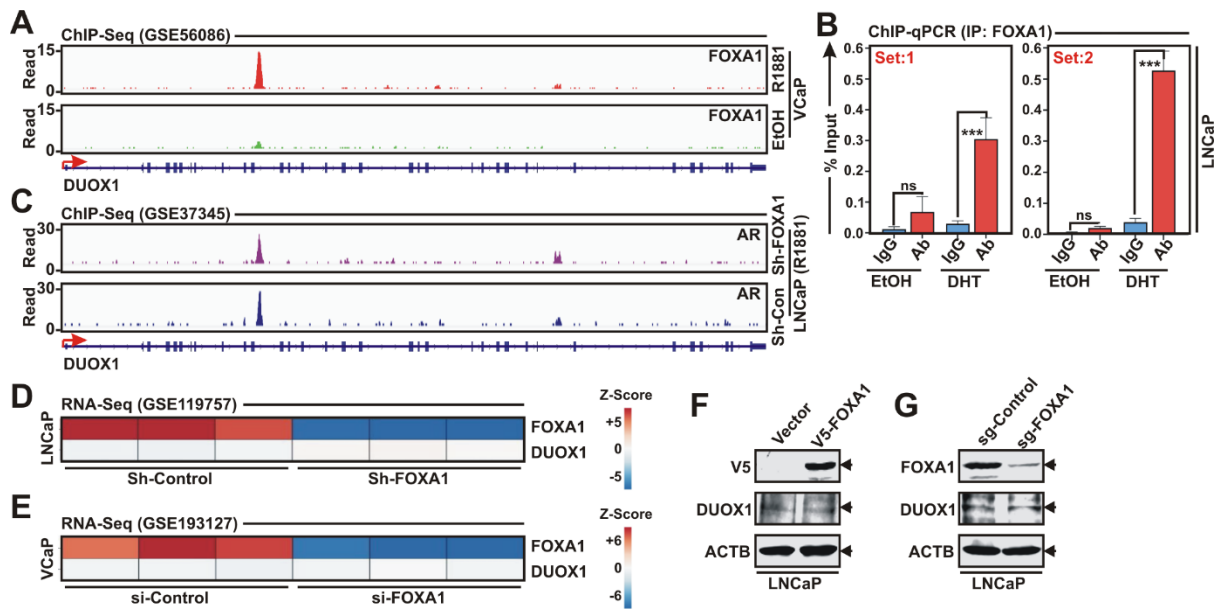

418 **Figure S9.** FOXA1 is dispensable for AR-mediated repression of DUOX1. **(A)** ChIP-Seq analysis  
 421 (GSE56086) in VCaP cells showing FOXA1 recruitment to the DUOX1 enhancer region following  
 422 androgen stimulation with R1881. **(B)** ChIP-qPCR analysis in LNCaP cells confirming androgen-induced  
 423 FOXA1 binding to the DUOX1 enhancer using two primer sets (1 and 2). **(C)** ChIP-Seq analysis  
 424 (GSE37345) showing no significant change in AR occupancy at the DUOX1 locus upon FOXA1  
 425 knockdown in R1881-treated LNCaP cells. **(D, E)** Heatmaps showing relative mRNA expression of  
 426 FOXA1 and DUOX1 in RNA-Seq datasets of (D) LNCaP (GSE11975) and (E) VCaP (GSE193127) cells  
 427 following FOXA1 knockdown. **(F, G)** WB analysis showing no significant change of DUOX1 expression  
 428 following (F) FOXA1 overexpression or (G) FOXA1 knockout in LNCaP cells. ChIP-qPCR data were  
 429 presented as the mean  $\pm$  SD,  $n \geq 3$  biological replicates. Significant differences were shown (\*\*\*)  $p <$   
 430 0.001; ns, not significant).

431  
 432  
 433  
 434  
 435  
 436  
 437  
 438  
 439  
 440  
 441  
 442  
 443  
 444  
 445  
 446  
 447  
 448  
 449  
 450  
 451

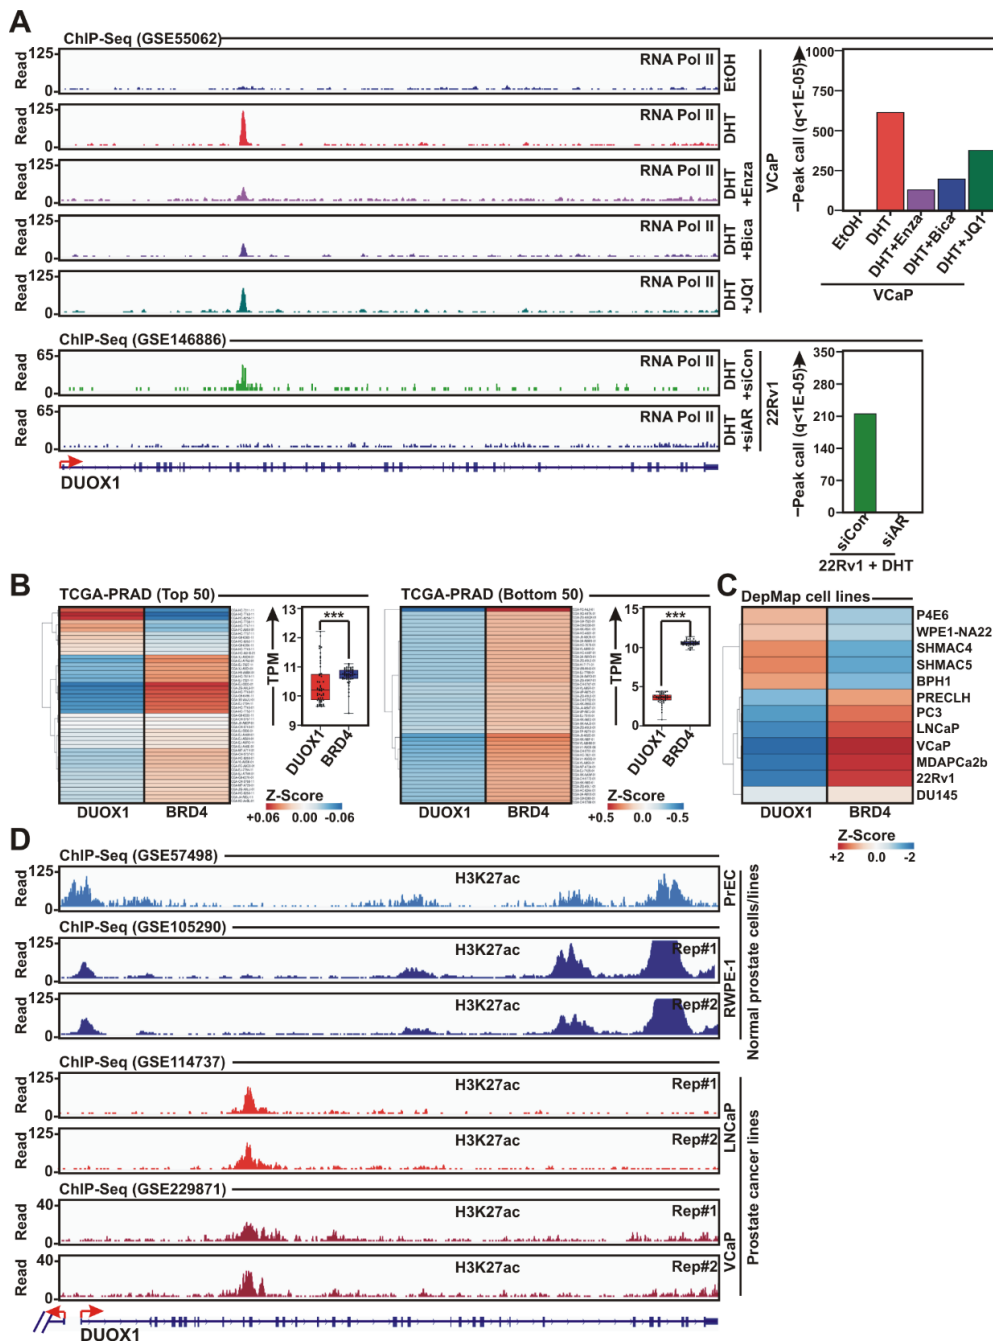

454  
455

456 **Figure S10.** The AR-BRD4-H3K27ac axis negatively regulates DUOX1 expression in PCa. **(A)** ChIP-Seq  
457 tracks (right) showing enrichment of RNA polymerase II (RNA Pol II) at the DUOX1 intragenic enhancer  
458 region in VCaP (GSE55062) and 22Rv1 (GSE146886) cells under the indicated experimental conditions.  
459 Bar diagrams (right) showing peak calling of RNA Pol II enrichment. **(B)** Heatmap showing RNA-Seq  
460 expression profiles of DUOX1 and BRD4 in primary PCa samples from the TCGA-PRAD dataset (DUOX1  
461 top and bottom 50 samples). The corresponding box plots (right) showing the inverse correlation  
462 between DUOX1 and BRD4 expression. **(C)** Heatmap showing relative expression of DUOX1 and BRD4  
463 in DepMap prostate cell lines (n = 12). **(D)** ChIP-Seq datasets from normal/benign prostate (GSE57498,  
464 GSE105290) and PCa (GSE114737, GSE229871) cell lines indicating redistribution of H3K27ac signals  
465 from the DUOX1 promoter to the AR-bound enhancer region during PCa progression. Significant  
466 differences were shown (\*\*\*)  $p < 0.001$ .

467  
468

**Figure S11**

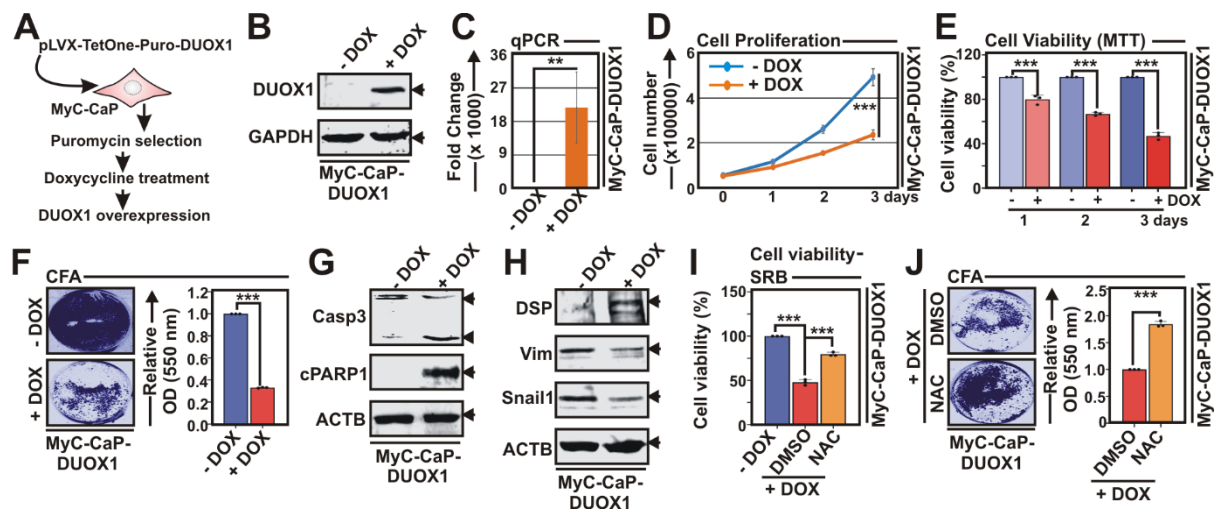

469  
470

471 **Figure S11.** Ectopic expression of DUOX1 in mouse PCa line MyC-CaP induces cell death and anti-  
472 anti-metastatic properties. **(A)** Schematic representation of the generation of a doxycycline (DOX)-  
473 inducible DUOX1 stable expression system in MyC-CaP cells (MyC-CaP-DUOX1). **(B)** WB analysis  
474 validating DUOX1 protein expression in DOX-treated MyC-CaP-DUOX1 cells. **(C)** qPCR analysis  
475 confirming inducible DUOX1 expression upon DOX treatment in MyC-CaP-DUOX1 cells. **(D)** Cell  
476 proliferation assay using the Trypan Blue exclusion method showing reduced growth of MyC-CaP-  
477 DUOX1 cells upon DOX induction over time (0-3 days). **(E)** MTT assay showing decreased cell viability  
478 of MyC-CaP-DUOX1 cells following DUOX1 induction over time (0–3 days). **(F)** Colony formation assay  
479 (CFA) demonstrating reduced clonogenic potential in DUOX1-expressing MyC-CaP cells upon DOX  
480 induction, with quantification of Crystal Violet staining at 550 nm (right panel). **(G)** WB analysis  
481 showing cleavage of apoptotic markers - Caspase-3 and PARP upon DUOX1 induction in MyC-CaP cells.  
482 **(H)** WB analysis showing differential expression of EMT markers upon DUOX1 induction in MyC-CaP  
483 cells. **(I)** Cell viability assays showing NAC-mediated rescue of cell death in DUOX1-expressing MyC-  
484 CaP cells using sulforhodamine B (SRB) assay. **(J)** CFA showing restoration of clonogenic potential in  
485 DUOX1-expressing MyC-CaP cells following NAC treatment, with quantification of Crystal Violet  
486 staining at 550 nm (right panel). Data were presented as the mean  $\pm$  SD,  $n \geq 3$  biological replicates.  
487 Significant differences were shown (\*\* $p < 0.01$ ; \*\*\*  $p < 0.001$ ).

488  
489  
490  
491  
492  
493  
494  
495  
496  
497  
498  
499  
500  
501  
502  
503  
504  
505

506 **Figure S12**  
 507

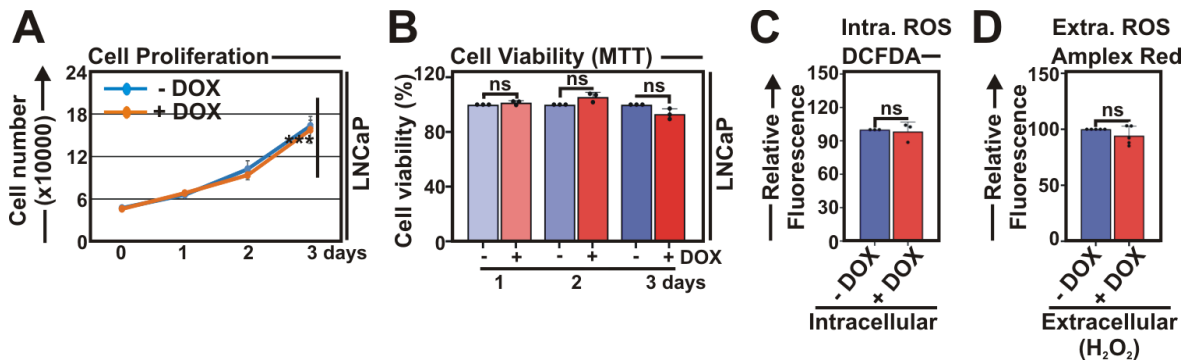

508 **Figure S12.** Doxycycline (DOX) treatment does not affect proliferation, viability or ROS production in  
 509 parental LNCaP cells. **(A)** Trypan Blue exclusion assay showing no significant change in cell proliferation  
 510 of LNCaP cells following treatment with 1  $\mu\text{g}/\text{mL}$  DOX for 72 h. **(B)** MTT assay showing no significant  
 511 change in cell viability under the same conditions. **(C, D)** DCFDA and Amplex Red assays showing no  
 512 significant change in (C) intracellular ROS levels and (D) extracellular  $\text{H}_2\text{O}_2$  production following 1  
 513  $\mu\text{g}/\text{ml}$  DOX treatment for 48 h. Data were presented as the mean  $\pm$  SD,  $n \geq 3$  biological replicates.  
 514 Significant differences were shown (ns, not significant).  
 515  
 516

517  
 518  
 519  
 520  
 521  
 522  
 523  
 524  
 525  
 526  
 527  
 528  
 529  
 530  
 531  
 532  
 533  
 534  
 535  
 536  
 537  
 538  
 539  
 540  
 541  
 542  
 543  
 544  
 545  
 546  
 547  
 548

549 **Figure S13**

550

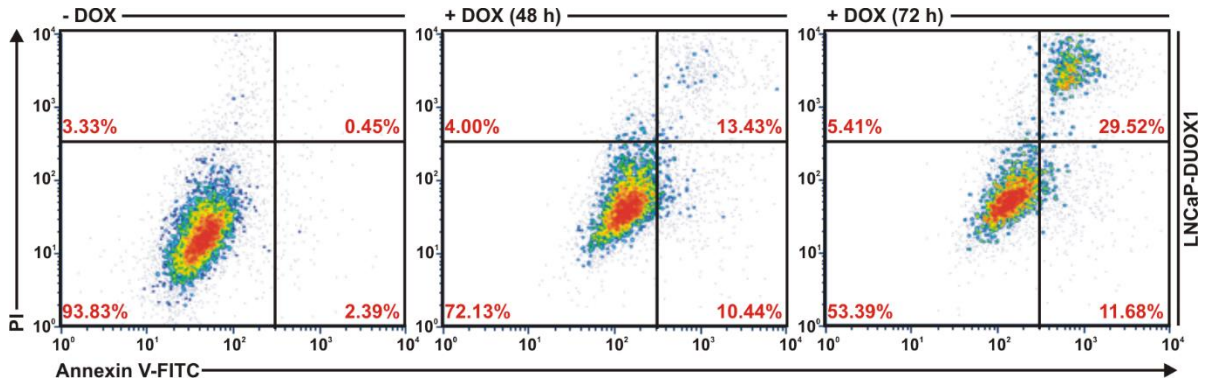

551

552

553 **Figure S13.** DUOX1 expression in LNCaP cells induces cell apoptosis. Annexin V/PI dual staining  
554 demonstrating increased apoptotic cell population following DUOX1 expression in LNCaP cells over  
555 time (0-72 h).

556

557

558

559

560

561

562

563

564

565

566

567

568

569

570

571

572

573

574

575

576

577

578

579

580

581

582

583

584

585

586

587

588

589

590

591 **Figure S14**  
592

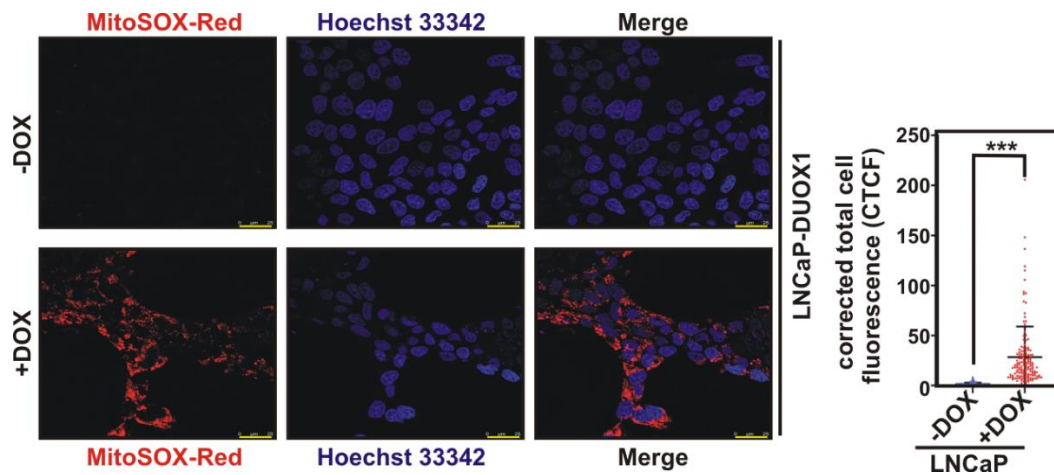

593 **Figure S14.** DUOX1 overexpression increases mitochondrial ROS in LNCaP cells. Representative  
594 fluorescence microscopy images showing mitochondrial superoxide levels measured by MitoSOX in  
595 LNCaP cells following DUOX1 induction. Nuclei were counterstained with Hoechst 33342. Scale bars,  
596 25  $\mu$ m. Dot plots of the same data (right) represent quantification of MitoSOX corrected total cell  
597 fluorescence (CTCF) per unit area, expressed as arbitrary units. Significant differences were shown  
598 (\*\*\*)  $p < 0.001$ .  
599  
600

601  
602  
603  
604  
605  
606  
607  
608  
609  
610  
611  
612  
613  
614  
615  
616  
617  
618  
619  
620  
621  
622  
623  
624  
625  
626  
627  
628  
629  
630

631 **Figure S15**  
 632

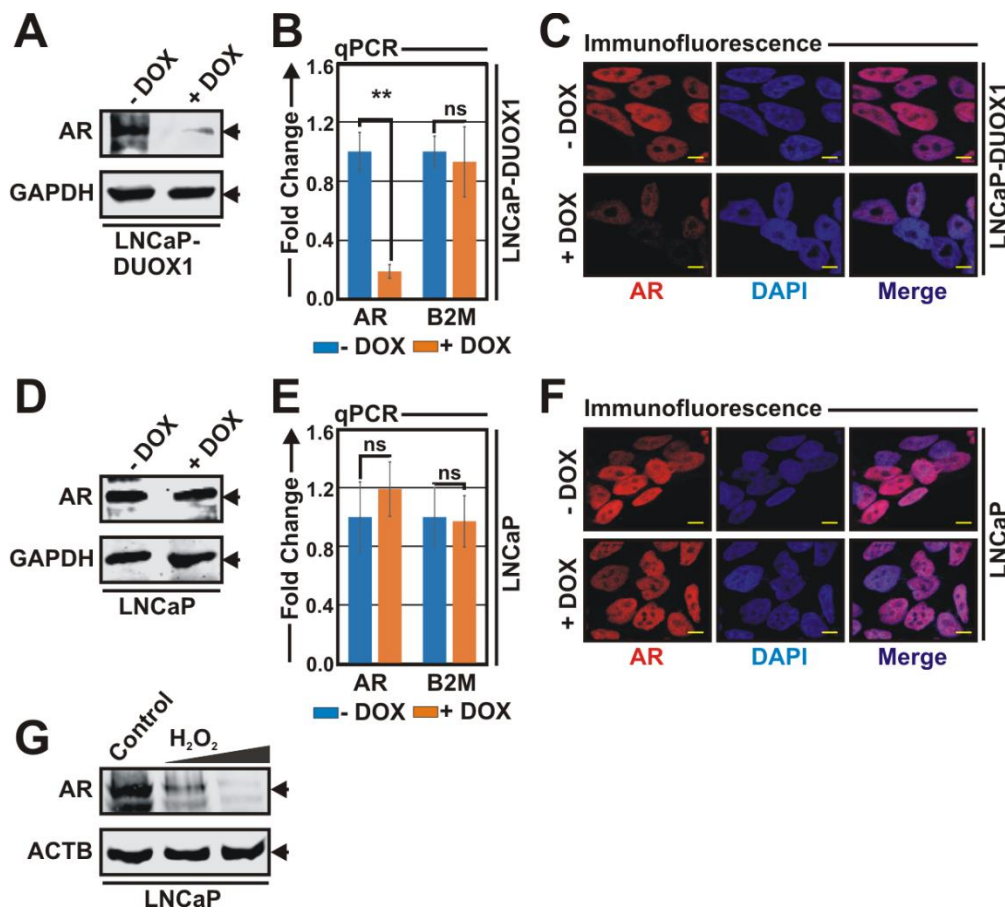

633  
 634  
 635 **Figure S15.** DUOX1 overexpression and H<sub>2</sub>O<sub>2</sub> treatment reduce AR expression in LNCaP cells. **(A)** WB  
 636 analysis showing reduced AR protein levels upon DUOX1 expression in LNCaP cells. **(B)** qPCR analysis  
 637 showing decreased AR transcript levels following DUOX1 expression in LNCaP cells. **(C)**  
 638 Immunofluorescence staining showing reduced AR (red) expression in DUOX1-expressing LNCaP cells.  
 639 Nuclei were counterstained with DAPI (blue). Scale bars, 5 μm. **(D)** WB analysis showing no significant  
 640 change in AR expression following doxycycline (DOX) treatment in parental LNCaP cells. **(E)**  
 641 Immunofluorescence staining showing no significant change in AR (red) expression upon DOX  
 642 treatment. Nuclei were counterstained with DAPI (blue). Scale bars, 5 μm. **(F)** WB analysis showing a  
 643 dose-dependent decrease in AR expression following H<sub>2</sub>O<sub>2</sub> treatment in LNCaP cells. Data were  
 644 presented as the mean ± SD, n ≥ 3 biological replicates. Significant differences were shown (\*\*p < 0.01;  
 645 ns, not significant).

646  
 647  
 648  
 649  
 650  
 651  
 652  
 653  
 654  
 655  
 656  
 657  
 658

659 Figure S16  
 660

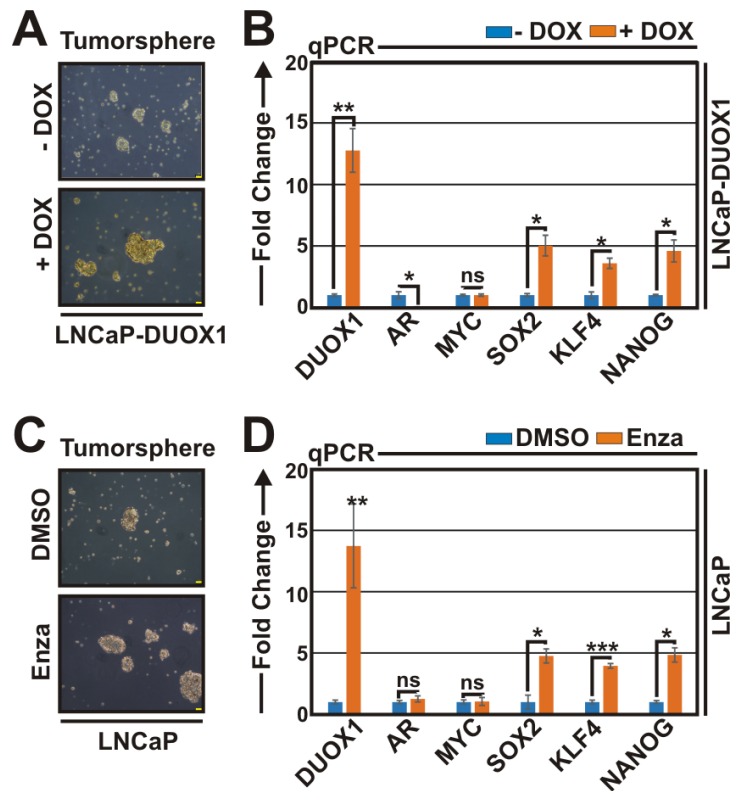

661  
 662  
 663 **Figure S16.** DUOX1-mediated AR downregulation promotes PCa stemness. **(A)** Representative phase-contrast images showing 3D tumor spheroids formed by LNCaP cells with or without DUOX1  
 664 expression following doxycycline (DOX) treatment. Scale bars, 50  $\mu$ m. **(B)** qPCR analysis showing relative transcript levels of the indicated genes in LNCaP tumorspheres upon DUOX1 expression, as  
 665 in (A). **(C)** Representative phase-contrast images showing 3D tumor spheroids formed by LNCaP cells with or without enzalutamide (Enza) treatment. Scale bars, 50  $\mu$ m. **(D)** qPCR analysis showing relative  
 666 transcript levels of the indicated genes in LNCaP tumorspheres following Enza treatment, as in (C).  
 667 Data were presented as the mean  $\pm$  SD,  $n \geq 3$  biological replicates. Significant differences were shown  
 668 (\*  $p < 0.05$ ; \*\*  $p < 0.01$ ; \*\*\*  $p < 0.001$ ; ns, not significant).  
 669  
 670  
 671

672  
 673  
 674  
 675  
 676  
 677  
 678  
 679  
 680  
 681  
 682  
 683  
 684  
 685  
 686  
 687  
 688  
 689

690 **Figure S17**  
691

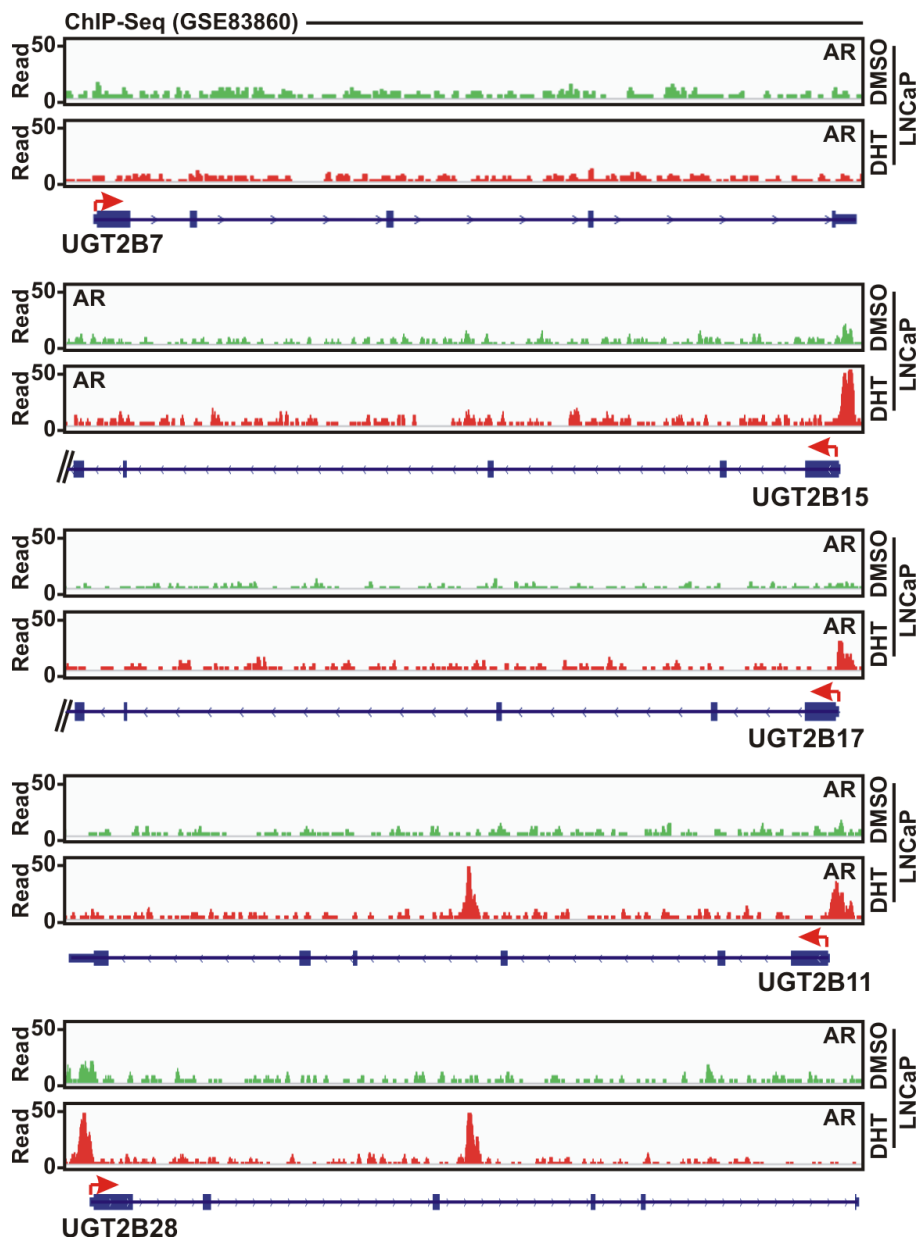

692  
693  
694  
695  
696  
697  
698  
699  
700  
701  
702  
703  
704  
705  
706  
707

**Figure S17.** AR binds to the promoter regions of UGT2B family genes. ChIP-Seq tracks (GSE83860) in LNCaP cells showing AR enrichment at the promoter regions of UGT2B family members - UGT2B15, UGT2B17, UGT2B11, and UGT2B28, but not UGT2B7, following androgen stimulation with dihydrotestosterone (DHT).
