# Supplementary material
Source: Research Square preprint supplement (doi:10.21203/rs.3.rs-9621447/v1)
Supplement: Supplementary file 2 [file e120baa7be0ecd03498de212.xlsx]

## Sheet: Information
Supplementary Table S9. RNA-Seq data of LNCaP cells stably expressing DUOX1 with or without doxycyline (DOX) treatment.
Sheet1	Original Raw data
Sheet2	Upregulated Genes log2FC(1) p<0.001
Sheet3	Downregulated Genes log2FC(-1) p<0.001
Sheet4	Rearranged Up genes by Log2FC
Sheet5	Rearranged down genes by Log2FC
Sheet6	Pathway GO DAVID (Top 10% Genes)
Sheet7	Pathway GO DAVID EDITED (p<0.05)
Sheet8	DAVID GO Pathway Heatmap

## Sheet: Sheet1
ENTREZID	ENSEMBL	SYMBOL	GENENAME	logFC	AveExpr	t	P.Value	adj.P.Val	B
467	ENSG00000162772	ATF3	activating transcription factor 3	5.69151	8.07296	66.4737	8.9326e-13	2.53641e-08	19.6081
148789	ENSG00000162885	B3GALNT2	beta-1,3-N-acetylgalactosaminyltransferase 2	4.48776	7.16947	51.2181	8.02109e-12	4.60425e-08	17.7934
65108	ENSG00000175130	MARCKSL1	MARCKS like 1	-4.07904	7.18671	-51.0488	8.24771e-12	4.60425e-08	17.8115
1026	ENSG00000124762	CDKN1A/p21	cyclin dependent kinase inhibitor 1A	4.32854	8.43528	50.7709	8.63523e-12	4.60425e-08	17.8089
80315	ENSG00000113742	CPEB4	cytoplasmic polyadenylation element binding protein 4	5.13973	5.80691	50.1964	9.50287e-12	4.60425e-08	17.3149
22837	ENSG00000082438	COBLL1	cordon-bleu WH2 repeat protein like 1	5.37235	5.77991	49.292	1.10733e-11	4.60425e-08	17.1446
23641	ENSG00000182195	LDOC1	LDOC1 regulator of NFKB signaling	-3.94749	7.45653	-49.1474	1.13505e-11	4.60425e-08	17.5457
79648	ENSG00000147316	MCPH1	microcephalin 1	4.45557	5.99067	47.2974	1.56732e-11	5.2473e-08	17.054
7367	ENSG00000197888	UGT2B17	UDP glucuronosyltransferase family 2 member B17	-6.58501	5.09006	-45.4523	2.19011e-11	5.2473e-08	16.2391
4093	ENSG00000120693	SMAD9	SMAD family member 9	5.99728	5.08376	45.2	2.29504e-11	5.2473e-08	16.1236
115196	ENSG00000172006	ZNF554	zinc finger protein 554	5.04258	5.64328	45.1389	2.32129e-11	5.2473e-08	16.5675
10457	ENSG00000136235	GPNMB	glycoprotein nmb	5.34128	5.3838	45.0155	2.37531e-11	5.2473e-08	16.4095
6130	ENSG00000148303	RPL7A	ribosomal protein L7a	-3.29473	10.6289	-44.6367	2.55017e-11	5.2473e-08	16.8457
162394	ENSG00000166750	SLFN5	schlafen family member 5	5.18512	5.70278	44.5603	2.58715e-11	5.2473e-08	16.4802
1647	ENSG00000116717	GADD45A	growth arrest and DNA damage inducible alpha	3.83945	6.36732	44.1598	2.79116e-11	5.28366e-08	16.6494
1644	ENSG00000132437	DDC	dopa decarboxylase	-4.88167	6.46221	-43.6733	3.06354e-11	5.43683e-08	16.5675
4189	ENSG00000128590	DNAJB9	DnaJ heat shock protein family (Hsp40) member B9	4.04689	5.78161	43.2939	3.29661e-11	5.50631e-08	16.4159
1130	ENSG00000143669	LYST	lysosomal trafficking regulator	5.59925	5.51385	42.2735	4.02817e-11	6.19493e-08	15.9896
27125	ENSG00000072364	AFF4	ALF transcription elongation factor 4	3.67847	7.2162	41.6673	4.54789e-11	6.19493e-08	16.2526
10973	ENSG00000112249	ASCC3	activating signal cointegrator 1 complex subunit 3	3.83387	6.02519	41.6342	4.57841e-11	6.19493e-08	16.1706
25803	ENSG00000124664	SPDEF	SAM pointed domain containing ETS transcription factor	-4.74799	5.10321	-41.4298	4.77165e-11	6.19493e-08	15.9763
10481	ENSG00000159184	HOXB13	homeobox B13	-3.65399	7.27423	-41.302	4.89714e-11	6.19493e-08	16.1933
5320	ENSG00000188257	PLA2G2A	phospholipase A2 group IIA	-4.279	5.06935	-41.0282	5.17848e-11	6.19493e-08	15.9468
56907	ENSG00000134278	SPIRE1	spire type actin nucleation factor 1	3.77754	6.13288	40.8103	5.4154e-11	6.19493e-08	16.0306
80351	ENSG00000107854	TNKS2	tankyrase 2	3.76888	5.84199	40.7756	5.45425e-11	6.19493e-08	15.9951
84366	ENSG00000159182	PRAC1	PRAC1 small nuclear protein	-4.90519	5.14105	-40.5801	5.67893e-11	6.20205e-08	15.8219
64782	ENSG00000181026	AEN	apoptosis enhancing nuclease	3.37362	7.18129	39.8711	6.58501e-11	6.92524e-08	15.9043
338707	ENSG00000182272	B4GALNT4	beta-1,4-N-acetyl-galactosaminyltransferase 4	-4.29994	5.74928	-39.1631	7.65408e-11	7.1667e-08	15.6922
4549	NA	RNR1	s-rRNA	2.86948	13.8813	38.9418	8.02709e-11	7.1667e-08	15.7347
57568	ENSG00000116991	SIPA1L2	signal induced proliferation associated 1 like 2	4.66285	4.80159	38.9004	8.09911e-11	7.1667e-08	15.338
220002	ENSG00000162144	CYB561A3	cytochrome b561 family member A3	-3.64216	5.69604	-38.7659	8.33799e-11	7.1667e-08	15.6312
8863	ENSG00000049246	PER3	period circadian regulator 3	3.96159	5.60834	38.6767	8.50085e-11	7.1667e-08	15.5556
2081	ENSG00000178607	ERN1	endoplasmic reticulum to nucleus signaling 1	7.04531	4.31168	38.4735	8.88517e-11	7.1667e-08	14.2748
8507	ENSG00000171617	ENC1	ectodermal-neural cortex 1	3.18583	6.54878	38.3553	9.11781e-11	7.1667e-08	15.5793
54676	ENSG00000172432	GTPBP2	GTP binding protein 2	3.11551	7.7413	38.2947	9.23954e-11	7.1667e-08	15.5877
2258	ENSG00000129682	FGF13	fibroblast growth factor 13	5.56671	4.39976	38.0881	9.66872e-11	7.1667e-08	14.8153
10529	ENSG00000078114	NEBL	nebulette	3.39978	6.56638	38.0288	9.79606e-11	7.1667e-08	15.5085
138639	ENSG00000158079	PTPDC1	protein tyrosine phosphatase domain containing 1	3.73348	5.75418	38.0258	9.80265e-11	7.1667e-08	15.4534
26136	ENSG00000135269	TES	testin LIM domain protein	3.3728	6.5127	38.007	9.84332e-11	7.1667e-08	15.5025
23064	ENSG00000107290	SETX	senataxin	3.48331	6.70548	37.7955	1.03155e-10	7.32271e-08	15.4622
9975	ENSG00000174738	NR1D2	nuclear receptor subfamily 1 group D member 2	3.81262	6.59026	37.6012	1.07714e-10	7.45987e-08	15.4127
2821	ENSG00000105220	GPI	glucose-6-phosphate isomerase	-2.98158	8.18132	-37.2105	1.17582e-10	7.90055e-08	15.3553
80853	ENSG00000006459	KDM7A	lysine demethylase 7A	4.75678	4.75638	37.0481	1.21978e-10	7.90055e-08	14.9703
55326	ENSG00000155189	AGPAT5	1-acylglycerol-3-phosphate O-acyltransferase 5	3.35839	6.02602	37.032	1.22425e-10	7.90055e-08	15.2756
4059	ENSG00000187244	BCAM	basal cell adhesion molecule (Lutheran blood group)	-3.0884	6.39493	-36.786	1.29467e-10	8.00292e-08	15.2469
3433	ENSG00000119922	IFIT2	interferon induced protein with tetratricopeptide repeats 2	7.02901	4.36428	36.7799	1.29648e-10	8.00292e-08	14.109
6840	ENSG00000197321	SVIL	supervillin	3.92669	5.5074	36.4107	1.41098e-10	8.52441e-08	15.0837
9168	ENSG00000034510	TMSB10	thymosin beta 10	-2.9588	7.01753	-36.3043	1.44607e-10	8.55442e-08	15.1465
1649	ENSG00000175197	DDIT3	DNA damage inducible transcript 3	2.88532	8.60924	36.1632	1.49408e-10	8.65804e-08	15.1182
9748	ENSG00000065613	SLK	STE20 like kinase	3.51241	6.4085	36.0453	1.53556e-10	8.72044e-08	15.0711
7108	ENSG00000149809	TM7SF2	transmembrane 7 superfamily member 2	-4.0099	6.88481	-35.9294	1.57763e-10	8.73854e-08	15.0564
64864	ENSG00000181827	RFX7	regulatory factor X7	3.80711	5.2859	35.7932	1.62871e-10	8.73854e-08	14.9321
6142	ENSG00000105640	RPL18A	ribosomal protein L18a	-3.36481	10.4393	-35.787	1.63107e-10	8.73854e-08	15.0304
10846	ENSG00000112541	PDE10A	phosphodiesterase 10A	3.71909	5.54401	35.6038	1.70283e-10	8.80717e-08	14.9226
8974	ENSG00000072682	P4HA2	prolyl 4-hydroxylase subunit alpha 2	3.3167	6.22742	35.39	1.79104e-10	8.80717e-08	14.9197
91748	ENSG00000156030	MIDEAS	mitotic deacetylase associated SANT domain protein	4.4934	5.92096	35.3526	1.807e-10	8.80717e-08	14.8695
116987	ENSG00000157985	AGAP1	ArfGAP with GTPase domain, ankyrin repeat and PH domain 1	3.08485	5.98971	35.29	1.83404e-10	8.80717e-08	14.8926
9249	ENSG00000162496	DHRS3	dehydrogenase/reductase 3	-3.66286	4.69274	-35.2878	1.83504e-10	8.80717e-08	14.8027
9119	ENSG00000170454	KRT75	keratin 75	5.82836	4.15758	35.2398	1.85608e-10	8.80717e-08	14.1209
6782	ENSG00000155304	HSPA13	heat shock protein family A (Hsp70) member 13	3.52384	5.24409	34.9598	1.9845e-10	8.80717e-08	14.7588
1795	ENSG00000088538	DOCK3	dedicator of cytokinesis 3	4.15692	5.21351	34.95	1.98917e-10	8.80717e-08	14.7177
100996485	ENSG00000224186	PITX1-AS1	PITX1 antisense RNA 1	-4.07935	4.54253	-34.9491	1.98959e-10	8.80717e-08	14.6768
3099	ENSG00000159399	HK2	hexokinase 2	2.9011	6.42145	34.8879	2.01906e-10	8.80717e-08	14.8105
10564	ENSG00000124198	ARFGEF2	ADP ribosylation factor guanine nucleotide exchange factor 2	3.55764	5.7734	34.8176	2.05349e-10	8.80717e-08	14.767
6809	ENSG00000166900	STX3	syntaxin 3	2.8632	6.84908	34.8124	2.05606e-10	8.80717e-08	14.7969
64778	ENSG00000075420	FNDC3B	fibronectin type III domain containing 3B	3.48701	5.42466	34.8009	2.06181e-10	8.80717e-08	14.7416
6867	ENSG00000147526	TACC1	transforming acidic coiled-coil containing protein 1	2.95583	7.05927	34.7433	2.09061e-10	8.80717e-08	14.7814
57291	ENSG00000226950	DANCR	differentiation antagonizing non-protein coding RNA	-3.34708	6.72197	-34.7068	2.10913e-10	8.80717e-08	14.7719
4783	ENSG00000165030	NFIL3	nuclear factor, interleukin 3 regulated	3.21772	5.48955	34.581	2.17432e-10	8.82339e-08	14.7045
4832	ENSG00000103024	NME3	NME/NM23 nucleoside diphosphate kinase 3	-3.06228	5.85101	-34.55	2.19075e-10	8.82339e-08	14.7257
54800	ENSG00000114796	KLHL24	kelch like family member 24	3.407	5.21287	34.4625	2.23784e-10	8.82339e-08	14.6496
65059	ENSG00000173166	RAPH1	Ras association (RalGDS/AF-6) and pleckstrin homology domains 1	3.7369	5.27685	34.4561	2.24131e-10	8.82339e-08	14.6404
23303	ENSG00000197892	KIF13B	kinesin family member 13B	3.42418	5.76289	34.3627	2.29289e-10	8.82339e-08	14.6636
116442	ENSG00000155961	RAB39B	RAB39B, member RAS oncogene family	3.40194	5.65979	34.351	2.29946e-10	8.82339e-08	14.6566
9857	ENSG00000135837	CEP350	centrosomal protein 350	3.4823	5.55592	34.1433	2.41939e-10	9.1598e-08	14.6002
54887	ENSG00000065060	BLTP3A	bridge-like lipid transfer protein family member 3A	3.26389	5.69087	33.9585	2.53199e-10	9.45032e-08	14.5686
3309	ENSG00000044574	HSPA5	heat shock protein family A (Hsp70) member 5	2.57953	10.2977	33.9002	2.56878e-10	9.45032e-08	14.5725
2091	ENSG00000105202	FBL	fibrillarin	-2.75322	7.50895	-33.8576	2.59597e-10	9.45032e-08	14.5662
54464	ENSG00000114127	XRN1	5'-3' exoribonuclease 1	3.39821	5.07783	33.6591	2.72714e-10	9.80217e-08	14.4525
6209	ENSG00000115268	RPS15	ribosomal protein S15	-3.16266	9.52433	-33.5956	2.77059e-10	9.83387e-08	14.4967
6147	ENSG00000198242	RPL23A	ribosomal protein L23a	-2.46861	10.178	-33.5065	2.83296e-10	9.93112e-08	14.4728
49854	ENSG00000173276	ZBTB21	zinc finger and BTB domain containing 21	2.89187	5.73401	33.4085	2.90341e-10	1.00171e-07	14.4429
4151	ENSG00000198125	MB	myoglobin	-3.16848	5.36685	-33.358	2.94045e-10	1.00171e-07	14.4266
6049	ENSG00000127870	RNF6	ring finger protein 6	3.00558	5.66091	33.2879	2.99271e-10	1.00171e-07	14.41
1843	ENSG00000120129	DUSP1	dual specificity phosphatase 1	2.87254	5.76549	33.2237	3.04153e-10	1.00171e-07	14.3987
4846	ENSG00000164867	NOS3	nitric oxide synthase 3	6.06682	4.62682	33.144	3.1034e-10	1.00171e-07	13.9163
6159	ENSG00000162244	RPL29	ribosomal protein L29	-3.26276	10.4652	-33.1052	3.13403e-10	1.00171e-07	14.3702
9695	ENSG00000134109	EDEM1	ER degradation enhancing alpha-mannosidase like protein 1	2.80309	6.08677	33.0906	3.14557e-10	1.00171e-07	14.3716
5441	ENSG00000177700	POLR2L	RNA polymerase II, I and III subunit L	-3.3174	6.90376	-33.0818	3.15261e-10	1.00171e-07	14.3727
23347	ENSG00000101596	SMCHD1	structural maintenance of chromosomes flexible hinge domain containing 1	3.04017	6.21494	33.0539	3.175e-10	1.00171e-07	14.3628
23389	ENSG00000123066	MED13L	mediator complex subunit 13L	4.02172	5.56382	32.9891	3.2276e-10	1.00712e-07	14.3117
96459	ENSG00000217128	FNIP1	folliculin interacting protein 1	3.45984	5.61237	32.9311	3.27553e-10	1.01097e-07	14.3134
3726	ENSG00000171223	JUNB	JunB proto-oncogene, AP-1 transcription factor subunit	2.75484	6.20477	32.8593	3.33607e-10	1.01174e-07	14.3148
6141	ENSG00000063177	RPL18	ribosomal protein L18	-2.91085	9.52605	-32.8437	3.3493e-10	1.01174e-07	14.3038
51477	ENSG00000105655	ISYNA1	inositol-3-phosphate synthase 1	-3.89925	5.10074	-32.7574	3.42399e-10	1.02341e-07	14.2534
143	ENSG00000102699	PARP4	poly(ADP-ribose) polymerase family member 4	3.15098	5.97805	32.6855	3.48764e-10	1.03158e-07	14.2667
3708	ENSG00000150995	ITPR1	inositol 1,4,5-trisphosphate receptor type 1	4.0132	4.87611	32.5581	3.60358e-10	1.05488e-07	14.1373
10802	ENSG00000113615	SEC24A	SEC24 homolog A, COPII coat complex component	3.42436	5.05375	32.4231	3.73129e-10	1.08112e-07	14.1549
7113	ENSG00000184012	TMPRSS2	transmembrane serine protease 2	-2.51481	7.68474	-32.3555	3.79707e-10	1.08723e-07	14.1818
9644	ENSG00000107957	SH3PXD2A	SH3 and PX domains 2A	5.52723	4.17652	32.3115	3.84064e-10	1.08723e-07	13.6747
221037	ENSG00000171988	JMJD1C	jumonji domain containing 1C	3.65209	6.11177	32.2848	3.86723e-10	1.08723e-07	14.1641
22862	ENSG00000102531	FNDC3A	fibronectin type III domain containing 3A	2.89994	5.48575	32.137	4.0188e-10	1.09979e-07	14.1197
8795	ENSG00000120889	TNFRSF10B	TNF receptor superfamily member 10b	2.60368	7.37891	32.117	4.03985e-10	1.09979e-07	14.122
9821	ENSG00000023287	RB1CC1	RB1 inducible coiled-coil 1	2.69225	7.0797	32.0819	4.07702e-10	1.09979e-07	14.1143
116496	ENSG00000135842	NIBAN1	niban apoptosis regulator 1	3.15275	5.65915	32.0221	4.14119e-10	1.09979e-07	14.0923
92840	ENSG00000115255	REEP6	receptor accessory protein 6	-3.03458	6.47726	-32.0213	4.14208e-10	1.09979e-07	14.0999
590	ENSG00000114200	BCHE	butyrylcholinesterase	-6.46838	3.30022	-32.0162	4.14757e-10	1.09979e-07	13.0712
55034	ENSG00000075643	MOCOS	molybdenum cofactor sulfurase	2.79193	6.3452	31.9837	4.18304e-10	1.09979e-07	14.0905
1657	ENSG00000172869	DMXL1	Dmx like 1	3.20417	6.05158	31.9075	4.26751e-10	1.10871e-07	14.0687
153222	ENSG00000164463	CREBRF	CREB3 regulatory factor	3.86836	5.05848	31.883	4.29504e-10	1.10871e-07	14.0053
6234	ENSG00000233927	RPS28	ribosomal protein S28	-3.00199	9.15641	-31.7807	4.41221e-10	1.1155e-07	14.0235
8682	ENSG00000162734	PEA15	proliferation and apoptosis adaptor protein 15	2.44392	7.76108	31.754	4.44328e-10	1.1155e-07	14.0231
55281	ENSG00000146859	TMEM140	transmembrane protein 140	3.05883	5.48868	31.7516	4.44612e-10	1.1155e-07	14.0193
3162	ENSG00000100292	HMOX1	heme oxygenase 1	2.66603	6.09459	31.7241	4.47851e-10	1.1155e-07	14.0222
26130	ENSG00000165219	GAPVD1	GTPase activating protein and VPS9 domains 1	2.71297	6.07044	31.6498	4.5673e-10	1.12392e-07	14.0026
53905	ENSG00000137857	DUOX1	dual oxidase 1	4.83385	4.30106	31.5973	4.63128e-10	1.12392e-07	13.7017
8499	ENSG00000139220	PPFIA2	PTPRF interacting protein alpha 2	-3.66661	5.63824	-31.5462	4.69453e-10	1.12392e-07	13.9716
23527	ENSG00000114331	ACAP2	ArfGAP with coiled-coil, ankyrin repeat and PH domains 2	3.07231	5.46823	31.5348	4.70871e-10	1.12392e-07	13.9628
85379	ENSG00000197077	KIAA1671	KIAA1671	2.61802	6.39006	31.4478	4.81889e-10	1.12392e-07	13.9488
2673	ENSG00000198380	GFPT1	glutamine--fructose-6-phosphate transaminase 1	2.87672	6.8787	31.4012	4.87915e-10	1.12392e-07	13.9346
55681	ENSG00000136021	SCYL2	SCY1 like pseudokinase 2	2.8418	5.93862	31.3635	4.92849e-10	1.12392e-07	13.9262
84166	ENSG00000140853	NLRC5	NLR family CARD domain containing 5	4.91315	4.38303	31.318	4.9887e-10	1.12392e-07	13.6473
7289	ENSG00000078246	TULP3	TUB like protein 3	2.77762	5.95309	31.3036	5.00796e-10	1.12392e-07	13.9105
51430	ENSG00000094975	SUCO	SUN domain containing ossification factor	2.70733	5.95095	31.2893	5.02718e-10	1.12392e-07	13.9068
23365	ENSG00000196914	ARHGEF12	Rho guanine nucleotide exchange factor 12	3.24199	6.65319	31.266	5.05867e-10	1.12392e-07	13.9
222484	ENSG00000139517	LNX2	ligand of numb-protein X 2	4.5368	5.13339	31.2417	5.09162e-10	1.12392e-07	13.818
7311	ENSG00000221983	UBA52	ubiquitin A-52 residue ribosomal protein fusion product 1	-2.86981	9.03666	-31.1899	5.1629e-10	1.12392e-07	13.8628
60312	ENSG00000196526	AFAP1	actin filament associated protein 1	4.06301	4.69678	31.1126	5.2713e-10	1.12392e-07	13.7596
55568	ENSG00000164574	GALNT10	polypeptide N-acetylgalactosaminyltransferase 10	2.45832	7.35957	31.0979	5.29216e-10	1.12392e-07	13.848
7465	ENSG00000166483	WEE1	WEE1 G2 checkpoint kinase	3.46355	5.01164	31.043	5.37111e-10	1.12392e-07	13.8058
26232	ENSG00000116661	FBXO2	F-box protein 2	-3.99449	3.77379	-31.0329	5.38576e-10	1.12392e-07	13.6424
4086	ENSG00000170365	SMAD1	SMAD family member 1	3.70747	4.7332	31.0324	5.38649e-10	1.12392e-07	13.7661
6169	ENSG00000172809	RPL38	ribosomal protein L38	-2.26671	8.67282	-31.0125	5.4155e-10	1.12392e-07	13.8148
23080	ENSG00000105778	AVL9	AVL9 cell migration associated	2.5771	6.03727	30.9971	5.43805e-10	1.12392e-07	13.8285
23036	ENSG00000188994	ZNF292	zinc finger protein 292	3.10121	5.82186	30.9627	5.48878e-10	1.12392e-07	13.8181
4155	ENSG00000197971	MBP	myelin basic protein	3.48259	5.73881	30.9492	5.50892e-10	1.12392e-07	13.8114
57448	ENSG00000115760	BIRC6	baculoviral IAP repeat containing 6	2.99146	6.12978	30.8943	5.59127e-10	1.12392e-07	13.8008
3276	ENSG00000126457	PRMT1	protein arginine methyltransferase 1	-2.2905	7.54178	-30.8914	5.59577e-10	1.12392e-07	13.7875
23074	ENSG00000111647	BLTP3B	bridge-like lipid transfer protein family member 3B	3.50008	5.02743	30.8671	5.63265e-10	1.12392e-07	13.7597
571	ENSG00000156273	BACH1	BTB domain and CNC homolog 1	3.81491	4.99255	30.8152	5.71256e-10	1.12392e-07	13.7318
27037	ENSG00000099899	TRMT2A	tRNA methyltransferase 2 homolog A	-2.67621	5.47507	-30.8054	5.72779e-10	1.12392e-07	13.7765
55504	ENSG00000127863	TNFRSF19	TNF receptor superfamily member 19	-2.93623	4.78554	-30.7989	5.73806e-10	1.12392e-07	13.761
3842	ENSG00000083312	TNPO1	transportin 1	2.36144	7.15948	30.7659	5.78974e-10	1.12392e-07	13.7579
7110	ENSG00000144747	TMF1	TATA element modulatory factor 1	3.0341	5.72875	30.7645	5.79198e-10	1.12392e-07	13.7643
55007	ENSG00000100376	FAM118A	family with sequence similarity 118 member A	-2.74965	5.91345	-30.7539	5.80859e-10	1.12392e-07	13.7622
64786	ENSG00000121749	TBC1D15	TBC1 domain family member 15	2.60581	5.81543	30.6934	5.90512e-10	1.12392e-07	13.7463
60681	ENSG00000141756	FKBP10	FKBP prolyl isomerase 10	-2.505	7.39922	-30.6851	5.91862e-10	1.12392e-07	13.7317
23269	ENSG00000174197	MGA	MAX dimerization protein MGA	2.79549	5.79974	30.6746	5.9356e-10	1.12392e-07	13.741
6217	ENSG00000105193	RPS16	ribosomal protein S16	-2.59889	10.1396	-30.6071	6.04598e-10	1.12392e-07	13.6968
25836	ENSG00000164190	NIPBL	NIPBL cohesin loading factor	2.8822	6.31146	30.5478	6.1449e-10	1.12392e-07	13.7054
10362	ENSG00000064961	HMG20B	high mobility group 20B	-2.61638	7.16128	-30.5199	6.19218e-10	1.12392e-07	13.6877
79794	ENSG00000111412	SPRING1	SREBF pathway regulator in golgi 1	3.05081	5.43139	30.5138	6.20252e-10	1.12392e-07	13.6926
22850	ENSG00000101544	ADNP2	ADNP homeobox 2	3.09792	5.35402	30.5132	6.20351e-10	1.12392e-07	13.6902
53944	ENSG00000169118	CSNK1G1	casein kinase 1 gamma 1	2.90238	5.11337	30.4949	6.23472e-10	1.12392e-07	13.6804
133746	ENSG00000152409	JMY	junction mediating and regulatory protein, p53 cofactor	2.49853	6.22225	30.4934	6.23725e-10	1.12392e-07	13.6901
6917	ENSG00000187735	TCEA1	transcription elongation factor A1	2.35538	7.96134	30.4811	6.25839e-10	1.12392e-07	13.6719
55914	ENSG00000112851	ERBIN	erbb2 interacting protein	2.51771	6.04257	30.4699	6.27772e-10	1.12392e-07	13.6846
9867	ENSG00000198961	PJA2	praja ring finger ubiquitin ligase 2	2.94724	5.80871	30.4699	6.27774e-10	1.12392e-07	13.6851
643988	ENSG00000228594	FNDC10	fibronectin type III domain containing 10	-4.25901	5.08457	-30.4607	6.2935e-10	1.12392e-07	13.6604
25873	ENSG00000130255	RPL36	ribosomal protein L36	-2.69476	9.76499	-30.3955	6.40747e-10	1.12982e-07	13.638
10267	ENSG00000132329	RAMP1	receptor activity modifying protein 1	-4.47288	6.44705	-30.3668	6.4584e-10	1.12982e-07	13.6563
57493	ENSG00000173706	HEG1	heart development protein with EGF like domains 1	4.93802	4.15942	30.3662	6.45944e-10	1.12982e-07	13.356
10565	ENSG00000066777	ARFGEF1	ADP ribosylation factor guanine nucleotide exchange factor 1	3.27946	5.81954	30.3515	6.48567e-10	1.12982e-07	13.6521
1340	ENSG00000126267	COX6B1	cytochrome c oxidase subunit 6B1	-2.75863	7.39686	-30.2643	6.6436e-10	1.136e-07	13.6142
8864	ENSG00000132326	PER2	period circadian regulator 2	3.53271	4.79489	30.2518	6.66663e-10	1.136e-07	13.5809
8527	ENSG00000077044	DGKD	diacylglycerol kinase delta	2.74058	6.04796	30.2043	6.75493e-10	1.136e-07	13.6114
23160	ENSG00000163811	WDR43	WD repeat domain 43	2.66029	5.72765	30.1742	6.81152e-10	1.136e-07	13.6038
23469	ENSG00000118482	PHF3	PHD finger protein 3	3.02103	5.37083	30.1724	6.81483e-10	1.136e-07	13.5991
57186	ENSG00000188559	RALGAPA2	Ral GTPase activating protein catalytic subunit alpha 2	3.0616	5.71981	30.1694	6.82058e-10	1.136e-07	13.6021
6249	ENSG00000130779	CLIP1	CAP-Gly domain containing linker protein 1	2.80333	7.03517	30.1552	6.84757e-10	1.136e-07	13.5896
7982	ENSG00000004866	ST7	suppression of tumorigenicity 7	-2.83843	5.53391	-30.141	6.87455e-10	1.136e-07	13.5946
55186	ENSG00000114120	SLC25A36	solute carrier family 25 member 36	2.98522	6.68343	30.1375	6.88122e-10	1.136e-07	13.5887
64651	ENSG00000144655	CSRNP1	cysteine and serine rich nuclear protein 1	3.385	5.1429	30.1084	6.93713e-10	1.13705e-07	13.57
9693	ENSG00000109756	RAPGEF2	Rap guanine nucleotide exchange factor 2	3.82642	4.90059	30.0924	6.96799e-10	1.13705e-07	13.5372
51274	ENSG00000109787	KLF3	KLF transcription factor 3	2.81246	5.2519	30.0593	7.03253e-10	1.13705e-07	13.5676
10979	ENSG00000073712	FERMT2	FERM domain containing kindlin 2	2.85805	5.24088	30.0286	7.09294e-10	1.13705e-07	13.5586
11108	ENSG00000110851	PRDM4	PR/SET domain 4	3.13077	5.65596	30.0174	7.11502e-10	1.13705e-07	13.5596
23336	ENSG00000182253	SYNM	synemin	3.60436	4.59916	30.0109	7.12784e-10	1.13705e-07	13.4947
5980	ENSG00000009413	REV3L	REV3 like, DNA directed polymerase zeta catalytic subunit	3.31334	4.53469	29.988	7.1736e-10	1.13796e-07	13.4955
3336	ENSG00000115541	HSPE1	heat shock protein family E (Hsp10) member 1	-3.02892	4.9367	-29.9514	7.24728e-10	1.13887e-07	13.5367
23140	ENSG00000074755	ZZEF1	zinc finger ZZ-type and EF-hand domain containing 1	2.43528	6.68911	29.9373	7.27591e-10	1.13887e-07	13.53
54587	ENSG00000162576	MXRA8	matrix remodeling associated 8	-3.86731	4.98493	-29.9256	7.29965e-10	1.13887e-07	13.5207
100507246	ENSG00000163597	SNHG16	small nucleolar RNA host gene 16	-3.21061	5.86994	-29.824	7.51038e-10	1.15169e-07	13.5051
58508	ENSG00000055609	KMT2C	lysine methyltransferase 2C	2.6948	6.75292	29.8179	7.52337e-10	1.15169e-07	13.4963
9043	ENSG00000008294	SPAG9	sperm associated antigen 9	3.03318	5.92399	29.8117	7.53629e-10	1.15169e-07	13.5027
84669	ENSG00000170832	USP32	ubiquitin specific peptidase 32	2.68426	5.48585	29.8081	7.54409e-10	1.15169e-07	13.5015
20	ENSG00000107331	ABCA2	ATP binding cassette subfamily A member 2	-2.6197	6.63872	-29.7204	7.73232e-10	1.16449e-07	13.4661
23049	ENSG00000157106	SMG1	SMG1 nonsense mediated mRNA decay associated PI3K related kinase	3.17678	6.12809	29.6909	7.79688e-10	1.16449e-07	13.4679
6210	ENSG00000134419	RPS15A	ribosomal protein S15a	-2.20064	9.21706	-29.6885	7.802e-10	1.16449e-07	13.4361
7071	ENSG00000155090	KLF10	KLF transcription factor 10	3.43724	4.84132	29.6755	7.83075e-10	1.16449e-07	13.4346
2597	ENSG00000111640	GAPDH	glyceraldehyde-3-phosphate dehydrogenase	-2.53355	11.3181	-29.628	7.93638e-10	1.16449e-07	13.4135
114789	ENSG00000148339	SLC25A25	solute carrier family 25 member 25	2.29232	6.89087	29.6263	7.94023e-10	1.16449e-07	13.4382
5797	ENSG00000173482	PTPRM	protein tyrosine phosphatase receptor type M	2.8551	5.66854	29.5801	8.04448e-10	1.16449e-07	13.4378
9415	ENSG00000134824	FADS2	fatty acid desaturase 2	-2.56282	7.20653	-29.577	8.05159e-10	1.16449e-07	13.4184
57609	ENSG00000066084	DIP2B	disco interacting protein 2 homolog B	2.71061	5.49208	29.5694	8.06899e-10	1.16449e-07	13.4346
6194	ENSG00000137154	RPS6	ribosomal protein S6	-2.27453	10.7964	-29.5533	8.10578e-10	1.16449e-07	13.392
285605	ENSG00000169570	DTWD2	DTW domain containing 2	2.76441	5.12672	29.5311	8.15691e-10	1.16449e-07	13.4197
55002	ENSG00000150403	TMCO3	transmembrane and coiled-coil domains 3	3.32925	7.00883	29.5306	8.158e-10	1.16449e-07	13.4137
50484	ENSG00000048392	RRM2B	ribonucleotide reductase regulatory TP53 inducible subunit M2B	3.14549	6.06841	29.5293	8.16108e-10	1.16449e-07	13.4222
9314	ENSG00000136826	KLF4	KLF transcription factor 4	4.45779	3.97537	29.4779	8.2809e-10	1.17217e-07	13.1608
22824	ENSG00000164070	HSPA4L	heat shock protein family A (Hsp70) member 4 like	3.51888	5.01009	29.4708	8.29745e-10	1.17217e-07	13.3877
406	ENSG00000133794	BMAL1	basic helix-loop-helix ARNT like 1	3.85048	4.06132	29.4484	8.35052e-10	1.17383e-07	13.2453
2803	ENSG00000144674	GOLGA4	golgin A4	2.74575	6.94271	29.4085	8.44559e-10	1.18134e-07	13.3764
9736	ENSG00000115464	USP34	ubiquitin specific peptidase 34	2.89077	5.79243	29.3396	8.61297e-10	1.19885e-07	13.3691
7994	ENSG00000083168	KAT6A	lysine acetyltransferase 6A	2.8704	5.35615	29.2991	8.71312e-10	1.20687e-07	13.3572
6868	ENSG00000151694	ADAM17	ADAM metallopeptidase domain 17	4.15738	4.25699	29.2451	8.84847e-10	1.21967e-07	13.2025
29958	ENSG00000132837	DMGDH	dimethylglycine dehydrogenase	3.98488	4.41873	29.2053	8.94983e-10	1.22438e-07	13.2374
85460	ENSG00000178163	ZNF518B	zinc finger protein 518B	3.6007	4.60129	29.1979	8.96885e-10	1.22438e-07	13.2802
6167	ENSG00000145592	RPL37	ribosomal protein L37	-2.40665	9.84046	-29.1653	9.05307e-10	1.22546e-07	13.2798
4616	ENSG00000099860	GADD45B	growth arrest and DNA damage inducible beta	3.15363	4.78728	29.1575	9.07327e-10	1.22546e-07	13.2974
5277	ENSG00000165195	PIGA	phosphatidylinositol glycan anchor biosynthesis class A	3.65087	4.45662	29.1348	9.13261e-10	1.22546e-07	13.2428
4736	ENSG00000198755	RPL10A	ribosomal protein L10a	-2.56327	9.55776	-29.1262	9.15517e-10	1.22546e-07	13.2693
80854	ENSG00000145391	SETD7	SET domain containing 7, histone lysine methyltransferase	2.47457	7.07118	29.112	9.19256e-10	1.22546e-07	13.2868
129642	ENSG00000143797	MBOAT2	membrane bound O-acyltransferase domain containing 2	2.41041	6.4149	29.0504	9.35683e-10	1.24066e-07	13.2769
10135	ENSG00000105835	NAMPT	nicotinamide phosphoribosyltransferase	2.5018	6.47247	29.0367	9.39397e-10	1.24066e-07	13.2726
8976	ENSG00000106299	WASL	WASP like actin nucleation promoting factor	2.45021	6.02331	29.0052	9.47948e-10	1.24079e-07	13.2689
117583	ENSG00000116117	PARD3B	par-3 family cell polarity regulator beta	3.00499	4.9634	29.0042	9.48239e-10	1.24079e-07	13.2654
9871	ENSG00000150961	SEC24D	SEC24 homolog D, COPII coat complex component	4.65835	4.89257	28.971	9.57369e-10	1.24436e-07	13.1987
27242	ENSG00000146072	TNFRSF21	TNF receptor superfamily member 21	2.80447	5.22507	28.9519	9.62658e-10	1.24436e-07	13.2575
23645	ENSG00000087074	PPP1R15A	protein phosphatase 1 regulatory subunit 15A	2.67838	5.40652	28.9238	9.70502e-10	1.24436e-07	13.2505
80709	ENSG00000106948	AKNA	AT-hook transcription factor	3.5219	5.51351	28.9175	9.72275e-10	1.24436e-07	13.2476
10413	ENSG00000137693	YAP1	Yes1 associated transcriptional regulator	2.43921	6.75347	28.9154	9.72873e-10	1.24436e-07	13.2327
4193	ENSG00000135679	MDM2	MDM2 proto-oncogene	2.6915	7.58909	28.8972	9.77998e-10	1.24486e-07	13.2178
9053	ENSG00000135525	MAP7	microtubule associated protein 7	2.68509	6.28361	28.8721	9.85132e-10	1.24486e-07	13.2276
3659	ENSG00000125347	IRF1	interferon regulatory factor 1	2.95126	4.76521	28.8378	9.9496e-10	1.24486e-07	13.2117
3570	ENSG00000160712	IL6R	interleukin 6 receptor	2.62679	6.25291	28.8209	9.99856e-10	1.24486e-07	13.2126
91860	ENSG00000129007	CALML4	calmodulin like 4	-3.59655	3.84778	-28.8206	9.99931e-10	1.24486e-07	13.1334
23001	ENSG00000163625	WDFY3	WD repeat and FYVE domain containing 3	2.82115	6.01992	28.814	1.00187e-09	1.24486e-07	13.2146
25934	ENSG00000136783	NIPSNAP3A	nipsnap homolog 3A	-3.42268	5.07929	-28.797	1.00682e-09	1.24486e-07	13.2127
64943	ENSG00000168268	NT5DC2	5'-nucleotidase domain containing 2	-3.34038	6.13671	-28.7918	1.00834e-09	1.24486e-07	13.2049
5597	ENSG00000069956	MAPK6	mitogen-activated protein kinase 6	3.18838	6.76073	28.7682	1.01527e-09	1.24799e-07	13.1929
57542	ENSG00000087448	KLHL42	kelch like family member 42	2.38881	6.16763	28.7278	1.02727e-09	1.25204e-07	13.185
9469	ENSG00000122863	CHST3	carbohydrate sulfotransferase 3	2.91011	5.26318	28.7274	1.02738e-09	1.25204e-07	13.193
6161	ENSG00000144713	RPL32	ribosomal protein L32	-2.5391	10.3186	-28.691	1.03835e-09	1.25222e-07	13.1359
4133	ENSG00000078018	MAP2	microtubule associated protein 2	4.82283	3.95072	28.6739	1.04354e-09	1.25222e-07	12.8954
23358	ENSG00000162402	USP24	ubiquitin specific peptidase 24	2.42906	6.11581	28.672	1.04412e-09	1.25222e-07	13.1694
9709	ENSG00000051108	HERPUD1	homocysteine inducible ER protein with ubiquitin like domain 1	2.18567	7.35332	28.6573	1.04859e-09	1.25222e-07	13.1466
23499	ENSG00000127603	MACF1	microtubule actin crosslinking factor 1	2.60162	7.34655	28.6541	1.04958e-09	1.25222e-07	13.1476
11252	ENSG00000100266	PACSIN2	protein kinase C and casein kinase substrate in neurons 2	2.31182	8.1646	28.617	1.06102e-09	1.25601e-07	13.1261
58480	ENSG00000116574	RHOU	ras homolog family member U	3.05661	5.28426	28.6151	1.0616e-09	1.25601e-07	13.1601
50618	ENSG00000198399	ITSN2	intersectin 2	2.51066	5.56749	28.5639	1.07761e-09	1.26234e-07	13.1446
90411	ENSG00000180398	MCFD2	multiple coagulation factor deficiency 2, ER cargo receptor complex subunit	2.49875	6.41749	28.538	1.08582e-09	1.26234e-07	13.1255
81890	ENSG00000213339	QTRT1	queuine tRNA-ribosyltransferase catalytic subunit 1	-2.93566	5.62697	-28.5047	1.09645e-09	1.26234e-07	13.1247
55193	ENSG00000163939	PBRM1	polybromo 1	2.35593	7.19311	28.4992	1.09822e-09	1.26234e-07	13.1018
394	ENSG00000100852	ARHGAP5	Rho GTPase activating protein 5	2.54455	6.04432	28.495	1.09957e-09	1.26234e-07	13.1185
85403	ENSG00000144597	EAF1	ELL associated factor 1	2.54745	5.72273	28.4886	1.10166e-09	1.26234e-07	13.1209
219699	ENSG00000107731	UNC5B	unc-5 netrin receptor B	3.56086	4.17496	28.4881	1.10181e-09	1.26234e-07	13.0381
4124	ENSG00000112893	MAN2A1	mannosidase alpha class 2A member 1	4.03867	4.15153	28.4859	1.10252e-09	1.26234e-07	12.9982
51322	ENSG00000095787	WAC	WW domain containing adaptor with coiled-coil	2.36126	7.50911	28.4651	1.10927e-09	1.26497e-07	13.0874
6188	ENSG00000149273	RPS3	ribosomal protein S3	-2.92266	10.1186	-28.4428	1.11656e-09	1.26502e-07	13.0613
25837	ENSG00000167964	RAB26	RAB26, member RAS oncogene family	-3.602	4.73216	-28.4378	1.11823e-09	1.26502e-07	13.1009
22841	ENSG00000107560	RAB11FIP2	RAB11 family interacting protein 2	3.01099	4.81026	28.3773	1.13829e-09	1.28261e-07	13.0819
219988	ENSG00000166889	PATL1	PAT1 homolog 1, processing body mRNA decay factor	3.41788	5.29484	28.3519	1.14686e-09	1.28716e-07	13.0822
7803	ENSG00000112245	PTP4A1	protein tyrosine phosphatase 4A1	2.34456	7.26254	28.2726	1.17402e-09	1.31149e-07	13.032
84335	ENSG00000204673	AKT1S1	AKT1 substrate 1	-2.22381	6.41679	-28.2506	1.18168e-09	1.31149e-07	13.0332
1946	ENSG00000184349	EFNA5	ephrin A5	-2.71085	4.9736	-28.2485	1.1824e-09	1.31149e-07	13.0534
57496	ENSG00000186260	MRTFB	myocardin related transcription factor B	2.49837	5.82809	28.1979	1.20027e-09	1.32613e-07	13.0324
6157	ENSG00000166441	RPL27A	ribosomal protein L27a	-2.46574	10.2861	-28.1607	1.21357e-09	1.33563e-07	12.9734
23312	ENSG00000104093	DMXL2	Dmx like 2	2.55245	5.32767	28.1332	1.22354e-09	1.34128e-07	13.0189
4853	ENSG00000134250	NOTCH2	notch receptor 2	2.64378	5.3267	28.1068	1.23317e-09	1.34128e-07	13.0112
6144	ENSG00000122026	RPL21	ribosomal protein L21	-2.13717	8.7513	-28.087	1.24046e-09	1.34128e-07	12.9572
10114	ENSG00000110422	HIPK3	homeodomain interacting protein kinase 3	2.94725	4.98383	28.0773	1.24404e-09	1.34128e-07	13
55332	ENSG00000136048	DRAM1	DNA damage regulated autophagy modulator 1	2.8927	4.81579	28.0771	1.24411e-09	1.34128e-07	12.9967
55970	ENSG00000172380	GNG12	G protein subunit gamma 12	2.45606	5.9826	28.0604	1.25033e-09	1.34128e-07	12.9882
1312	ENSG00000093010	COMT	catechol-O-methyltransferase	-2.16528	7.11689	-28.0431	1.25676e-09	1.34128e-07	12.9592
55602	ENSG00000168564	CDKN2AIP	CDKN2A interacting protein	3.50684	4.28471	28.0424	1.25702e-09	1.34128e-07	12.9325
155066	ENSG00000171130	ATP6V0E2	ATPase H+ transporting V0 subunit e2	-2.26824	6.66058	-28.0313	1.26121e-09	1.34128e-07	12.9625
726	ENSG00000149260	CAPN5	calpain 5	2.30067	6.03743	27.9755	1.2824e-09	1.35471e-07	12.9604
57106	ENSG00000090971	NAT14	N-acetyltransferase 14 (putative)	-3.5738	4.48727	-27.9729	1.28339e-09	1.35471e-07	12.9571
6659	ENSG00000124766	SOX4	SRY-box transcription factor 4	-2.23273	6.89305	-27.9306	1.29971e-09	1.36686e-07	12.9278
9475	ENSG00000134318	ROCK2	Rho associated coiled-coil containing protein kinase 2	2.6742	5.33312	27.8841	1.31795e-09	1.37579e-07	12.9446
7508	ENSG00000154767	XPC	XPC complex subunit, DNA damage recognition and repair factor	2.65386	7.23436	27.8643	1.32579e-09	1.37579e-07	12.9084
6239	ENSG00000124782	RREB1	ras responsive element binding protein 1	2.63242	5.48257	27.8517	1.33079e-09	1.37579e-07	12.9333
10672	ENSG00000120063	GNA13	G protein subunit alpha 13	3.0944	5.42033	27.8447	1.33361e-09	1.37579e-07	12.9332
79659	ENSG00000187240	DYNC2H1	dynein cytoplasmic 2 heavy chain 1	2.75557	5.56858	27.8422	1.33462e-09	1.37579e-07	12.93
3685	ENSG00000138448	ITGAV	integrin subunit alpha V	2.85708	5.51618	27.8337	1.33802e-09	1.37579e-07	12.9285
3005	ENSG00000189060	H1-0	H1.0 linker histone	3.59081	8.43242	27.8235	1.34212e-09	1.37579e-07	12.8842
6158	ENSG00000108107	RPL28	ribosomal protein L28	-2.89858	10.27	-27.7777	1.36071e-09	1.38451e-07	12.8545
5187	ENSG00000179094	PER1	period circadian regulator 1	2.95719	5.78365	27.7676	1.36484e-09	1.38451e-07	12.9055
3716	ENSG00000162434	JAK1	Janus kinase 1	3.1757	4.51656	27.7667	1.36525e-09	1.38451e-07	12.888
5216	ENSG00000108518	PFN1	profilin 1	-2.02901	9.01513	-27.7087	1.3893e-09	1.40389e-07	12.8374
5052	ENSG00000117450	PRDX1	peroxiredoxin 1	-3.10411	7.53415	-27.6952	1.39495e-09	1.4046e-07	12.8493
23057	ENSG00000157064	NMNAT2	nicotinamide nucleotide adenylyltransferase 2	3.35634	4.09157	27.6712	1.40511e-09	1.4086e-07	12.8133
60437	ENSG00000124215	CDH26	cadherin 26	-2.52652	5.24271	-27.638	1.41927e-09	1.4086e-07	12.8669
5426	ENSG00000177084	POLE	DNA polymerase epsilon, catalytic subunit	2.46067	6.92525	27.6359	1.42015e-09	1.4086e-07	12.8412
4830	ENSG00000239672	NME1	NME/NM23 nucleoside diphosphate kinase 1	-2.95125	5.25867	-27.6321	1.42181e-09	1.4086e-07	12.8668
7033	ENSG00000160180	TFF3	trefoil factor 3	-4.93	4.12146	-27.6276	1.42374e-09	1.4086e-07	12.76
6152	ENSG00000114391	RPL24	ribosomal protein L24	-2.71591	9.23207	-27.5566	1.45469e-09	1.43424e-07	12.7889
6191	ENSG00000198034	RPS4X	ribosomal protein S4 X-linked	-2.26614	10.0355	-27.5056	1.47738e-09	1.45156e-07	12.7685
10376	ENSG00000123416	TUBA1B	tubulin alpha 1b	-2.54813	7.95526	-27.4313	1.51114e-09	1.4734e-07	12.759
10184	ENSG00000145685	LHFPL2	LHFPL tetraspan subfamily member 2	4.38611	3.47167	27.4193	1.51664e-09	1.4734e-07	12.4907
23362	ENSG00000156011	PSD3	pleckstrin and Sec7 domain containing 3	2.87874	4.81231	27.4141	1.51904e-09	1.4734e-07	12.8007
221656	ENSG00000165097	KDM1B	lysine demethylase 1B	2.67962	4.95582	27.3887	1.53088e-09	1.4734e-07	12.7956
90024	ENSG00000254531	FLJ20021	uncharacterized LOC90024	-2.58172	4.78051	-27.3834	1.53335e-09	1.4734e-07	12.794
5468	ENSG00000132170	PPARG	peroxisome proliferator activated receptor gamma	2.64256	4.97696	27.3773	1.53618e-09	1.4734e-07	12.7923
29903	ENSG00000173581	CCDC106	coiled-coil domain containing 106	-2.57353	5.96859	-27.3616	1.54357e-09	1.4734e-07	12.7684
3399	ENSG00000117318	ID3	inhibitor of DNA binding 3	4.68185	5.6105	27.3579	1.54534e-09	1.4734e-07	12.7839
79618	ENSG00000147421	HMBOX1	homeobox containing 1	2.34376	5.99777	27.3545	1.54694e-09	1.4734e-07	12.7697
734	ENSG00000164823	OSGIN2	oxidative stress induced growth inhibitor family member 2	2.9886	4.81877	27.3389	1.55432e-09	1.4734e-07	12.7771
4673	ENSG00000187109	NAP1L1	nucleosome assembly protein 1 like 1	-2.78283	8.92664	-27.3253	1.56077e-09	1.4734e-07	12.7174
673	ENSG00000157764	BRAF	B-Raf proto-oncogene, serine/threonine kinase	3.1426	5.66092	27.316	1.56523e-09	1.4734e-07	12.7698
113251	ENSG00000161813	LARP4	La ribonucleoprotein 4	2.63126	6.28563	27.3	1.57292e-09	1.4734e-07	12.749
2648	ENSG00000108773	KAT2A	lysine acetyltransferase 2A	-2.17258	6.87211	-27.2949	1.57536e-09	1.4734e-07	12.7288
23607	ENSG00000198087	CD2AP	CD2 associated protein	2.49869	5.65822	27.2881	1.57865e-09	1.4734e-07	12.7569
83737	ENSG00000078747	ITCH	itchy E3 ubiquitin protein ligase	2.57579	5.45713	27.2799	1.58262e-09	1.4734e-07	12.7584
55672	ENSG00000219481	NBPF1	NBPF member 1	4.49168	4.32782	27.2614	1.59162e-09	1.47693e-07	12.66
85377	ENSG00000100139	MICALL1	MICAL like 1	2.65584	7.17916	27.2255	1.60923e-09	1.4884e-07	12.7088
10006	ENSG00000136754	ABI1	abl interactor 1	2.65904	5.38811	27.2076	1.6181e-09	1.49175e-07	12.7374
11215	ENSG00000023516	AKAP11	A-kinase anchoring protein 11	2.8732	4.6379	27.1799	1.63193e-09	1.49704e-07	12.7261
283131	ENSG00000245532	NEAT1	nuclear paraspeckle assembly transcript 1	1.94844	9.59113	27.175	1.63438e-09	1.49704e-07	12.6653
157769	ENSG00000176853	FAM91A1	family with sequence similarity 91 member A1	2.69146	5.35442	27.1325	1.65588e-09	1.51179e-07	12.7148
51366	ENSG00000104517	UBR5	ubiquitin protein ligase E3 component n-recognin 5	2.23652	6.9744	27.1222	1.66114e-09	1.51179e-07	12.6768
5478	ENSG00000196262	PPIA	peptidylprolyl isomerase A	-2.37867	9.49766	-27.1073	1.66877e-09	1.51389e-07	12.6434
64393	ENSG00000172667	ZMAT3	zinc finger matrin-type 3	3.131	5.69807	27.0809	1.6824e-09	1.51646e-07	12.6963
3177	ENSG00000174669	SLC29A2	solute carrier family 29 member 2	-2.72339	4.58833	-27.0636	1.69142e-09	1.51646e-07	12.6961
4734	ENSG00000069869	NEDD4	NEDD4 E3 ubiquitin protein ligase	4.82752	4.08663	27.0601	1.69324e-09	1.51646e-07	12.5242
23671	ENSG00000144339	TMEFF2	transmembrane protein with EGF like and two follistatin like domains 2	-2.16914	6.46928	-27.0556	1.6956e-09	1.51646e-07	12.6596
64412	ENSG00000125812	GZF1	GDNF inducible zinc finger protein 1	2.75281	5.50721	27.0504	1.6983e-09	1.51646e-07	12.6873
23116	ENSG00000198718	TOGARAM1	TOG array regulator of axonemal microtubules 1	3.16391	4.84612	26.9994	1.72528e-09	1.53256e-07	12.6735
80012	ENSG00000173889	PHC3	polyhomeotic homolog 3	3.24765	5.53629	26.9803	1.73555e-09	1.53256e-07	12.6679
50804	ENSG00000104177	MYEF2	myelin expression factor 2	3.52725	4.00787	26.9795	1.73593e-09	1.53256e-07	12.5961
66008	ENSG00000115993	TRAK2	trafficking kinesin protein 2	2.27267	5.78741	26.9758	1.73793e-09	1.53256e-07	12.6545
25932	ENSG00000169504	CLIC4	chloride intracellular channel 4	2.28535	6.6826	26.9429	1.75573e-09	1.54201e-07	12.6251
81539	ENSG00000111371	SLC38A1	solute carrier family 38 member 1	2.00868	7.80997	26.9338	1.76071e-09	1.54201e-07	12.6024
27324	ENSG00000103460	TOX3	TOX high mobility group box family member 3	3.48729	4.57762	26.9261	1.76493e-09	1.54201e-07	12.6365
342371	ENSG00000224470	ATXN1L	ataxin 1 like	3.20758	4.92819	26.9143	1.77141e-09	1.54226e-07	12.6487
3475	ENSG00000006652	IFRD1	interferon related developmental regulator 1	2.88576	6.88519	26.9058	1.77609e-09	1.54226e-07	12.6137
51690	ENSG00000130332	LSM7	LSM7 homolog, U6 small nuclear RNA and mRNA degradation associated	-3.288	6.31224	-26.892	1.78371e-09	1.54416e-07	12.6174
100128881	ENSG00000261373	VPS9D1-AS1	VPS9D1 antisense RNA 1	-3.76252	3.69818	-26.8713	1.79521e-09	1.54589e-07	12.5603
29072	ENSG00000181555	SETD2	SET domain containing 2, histone lysine methyltransferase	2.55128	6.47785	26.8491	1.80761e-09	1.54589e-07	12.6011
23086	ENSG00000110723	EXPH5	exophilin 5	2.76098	4.71799	26.8436	1.81072e-09	1.54589e-07	12.6265
79660	ENSG00000173281	PPP1R3B	protein phosphatase 1 regulatory subunit 3B	2.81534	4.89482	26.8389	1.81337e-09	1.54589e-07	12.6267
6498	ENSG00000136603	SKIL	SKI like proto-oncogene	3.78096	4.58498	26.8348	1.81571e-09	1.54589e-07	12.6001
151887	ENSG00000091986	CCDC80	coiled-coil domain containing 80	4.09975	3.97296	26.8182	1.82508e-09	1.54589e-07	12.5039
57551	ENSG00000160551	TAOK1	TAO kinase 1	2.3944	5.661	26.7983	1.83647e-09	1.54589e-07	12.6019
25924	ENSG00000170011	MYRIP	myosin VIIA and Rab interacting protein	2.56339	4.9542	26.7973	1.83703e-09	1.54589e-07	12.6137
57622	ENSG00000128011	LRFN1	leucine rich repeat and fibronectin type III domain containing 1	-3.14596	4.11612	-26.795	1.83835e-09	1.54589e-07	12.5991
1195	ENSG00000013441	CLK1	CDC like kinase 1	2.33109	6.40808	26.782	1.84579e-09	1.54589e-07	12.5793
5903	ENSG00000153201	RANBP2	RAN binding protein 2	2.05079	7.40929	26.778	1.84807e-09	1.54589e-07	12.5577
6205	ENSG00000142534	RPS11	ribosomal protein S11	-2.82843	10.2857	-26.7642	1.85609e-09	1.54589e-07	12.5291
116238	ENSG00000160606	TLCD1	TLC domain containing 1	-3.48714	4.9655	-26.7553	1.8612e-09	1.54589e-07	12.6007
4253	ENSG00000150527	MIA2	MIA SH3 domain ER export factor 2	3.06934	6.20519	26.7541	1.86193e-09	1.54589e-07	12.5812
80023	ENSG00000125841	NRSN2	neurensin 2	-2.28913	6.027	-26.7433	1.86822e-09	1.5466e-07	12.569
11253	ENSG00000177239	MAN1B1	mannosidase alpha class 1B member 1	-2.58117	6.29196	-26.7338	1.87374e-09	1.54666e-07	12.562
975	ENSG00000110651	CD81	CD81 molecule	-2.22564	7.96738	-26.7143	1.88523e-09	1.54848e-07	12.5272
667	ENSG00000151914	DST	dystonin	3.10831	4.47615	26.7115	1.88687e-09	1.54848e-07	12.5749
8658	ENSG00000173273	TNKS	tankyrase	2.40748	5.95798	26.688	1.90081e-09	1.54931e-07	12.5598
26007	ENSG00000149476	TKFC	triokinase and FMN cyclase	-2.20253	6.85532	-26.6719	1.91037e-09	1.54931e-07	12.5289
2109	ENSG00000105379	ETFB	electron transfer flavoprotein subunit beta	-2.75021	7.37959	-26.6655	1.91423e-09	1.54931e-07	12.5208
6192	ENSG00000129824	RPS4Y1	ribosomal protein S4 Y-linked 1	-4.61956	6.32546	-26.6554	1.92026e-09	1.54931e-07	12.5538
1054	ENSG00000153879	CEBPG	CCAAT enhancer binding protein gamma	2.0161	7.48211	26.6447	1.92673e-09	1.54931e-07	12.5129
220323	ENSG00000184232	OAF	out at first homolog	-3.98081	3.19345	-26.6399	1.92963e-09	1.54931e-07	12.3804
9882	ENSG00000136111	TBC1D4	TBC1 domain family member 4	3.29978	4.06376	26.6387	1.93037e-09	1.54931e-07	12.5159
26115	ENSG00000170921	TANC2	tetratricopeptide repeat, ankyrin repeat and coiled-coil containing 2	2.77088	4.61073	26.6368	1.93152e-09	1.54931e-07	12.5609
7068	ENSG00000151090	THRB	thyroid hormone receptor beta	3.31447	3.95694	26.5963	1.95617e-09	1.55792e-07	12.4899
85461	ENSG00000115183	TANC1	tetratricopeptide repeat, ankyrin repeat and coiled-coil containing 1	2.43572	6.31192	26.593	1.9582e-09	1.55792e-07	12.5212
1407	ENSG00000008405	CRY1	cryptochrome circadian regulator 1	3.14342	4.27476	26.5879	1.96134e-09	1.55792e-07	12.5248
7053	ENSG00000125780	TGM3	transglutaminase 3	-4.30336	3.62896	-26.5712	1.97167e-09	1.55792e-07	12.4221
6136	ENSG00000197958	RPL12	ribosomal protein L12	-2.38463	10.0385	-26.5685	1.97334e-09	1.55792e-07	12.4651
118987	ENSG00000165650	PDZD8	PDZ domain containing 8	2.63157	5.5066	26.5633	1.97659e-09	1.55792e-07	12.5322
7832	ENSG00000159388	BTG2	BTG anti-proliferation factor 2	3.1165	6.21951	26.5567	1.98066e-09	1.55792e-07	12.5179
55356	ENSG00000163393	SLC22A15	solute carrier family 22 member 15	4.62951	3.46675	26.5417	1.99002e-09	1.56096e-07	12.2242
8805	ENSG00000122779	TRIM24	tripartite motif containing 24	2.37535	5.63372	26.5139	2.00753e-09	1.56794e-07	12.5113
55671	ENSG00000100796	PPP4R3A	protein phosphatase 4 regulatory subunit 3A	2.57235	6.16953	26.51	2.00996e-09	1.56794e-07	12.4988
64746	ENSG00000182827	ACBD3	acyl-CoA binding domain containing 3	2.56042	5.27485	26.5008	2.01581e-09	1.56819e-07	12.5165
23331	ENSG00000100154	TTC28	tetratricopeptide repeat domain 28	2.96526	4.55633	26.4823	2.02761e-09	1.57306e-07	12.5099
7001	ENSG00000167815	PRDX2	peroxiredoxin 2	-2.32773	8.41548	-26.4183	2.069e-09	1.59854e-07	12.4255
6208	ENSG00000164587	RPS14	ribosomal protein S14	-2.72905	10.5334	-26.4141	2.07171e-09	1.59854e-07	12.4127
1241	ENSG00000213903	LTB4R	leukotriene B4 receptor	-3.18559	4.15236	-26.3943	2.08474e-09	1.60004e-07	12.478
79875	ENSG00000187720	THSD4	thrombospondin type 1 domain containing 4	4.76858	3.83185	26.3861	2.09018e-09	1.60004e-07	12.2797
57007	ENSG00000144476	ACKR3	atypical chemokine receptor 3	-2.54039	5.10709	-26.3775	2.09585e-09	1.60004e-07	12.474
57561	ENSG00000113369	ARRDC3	arrestin domain containing 3	2.35668	5.62276	26.377	2.0962e-09	1.60004e-07	12.4672
3572	ENSG00000134352	IL6ST	interleukin 6 cytokine family signal transducer	2.34363	5.70982	26.342	2.11956e-09	1.61354e-07	12.4536
7477	ENSG00000188064	WNT7B	Wnt family member 7B	-3.57629	3.31699	-26.2938	2.15219e-09	1.61837e-07	12.3459
25840	ENSG00000185432	TMT1A	thiol methyltransferase 1A	-3.80002	3.34474	-26.2917	2.15361e-09	1.61837e-07	12.332
4217	ENSG00000197442	MAP3K5	mitogen-activated protein kinase kinase kinase 5	3.20876	4.7348	26.2814	2.16068e-09	1.61837e-07	12.4492
54520	ENSG00000125633	CCDC93	coiled-coil domain containing 93	2.35646	5.83919	26.2732	2.1663e-09	1.61837e-07	12.4279
23132	ENSG00000164080	RAD54L2	RAD54 like 2	2.29056	6.05779	26.2715	2.16748e-09	1.61837e-07	12.4212
84919	ENSG00000158615	PPP1R15B	protein phosphatase 1 regulatory subunit 15B	2.4878	6.1992	26.2611	2.17462e-09	1.61837e-07	12.4161
8493	ENSG00000170836	PPM1D	protein phosphatase, Mg2+/Mn2+ dependent 1D	2.92394	4.41359	26.2531	2.1802e-09	1.61837e-07	12.4348
400931	ENSG00000197182	MIRLET7BHG	MIRLET7B host gene	-3.96399	3.69276	-26.2508	2.18181e-09	1.61837e-07	12.366
5045	ENSG00000140564	FURIN	furin, paired basic amino acid cleaving enzyme	2.37198	6.1071	26.2415	2.18823e-09	1.61837e-07	12.4109
3915	ENSG00000135862	LAMC1	laminin subunit gamma 1	2.16184	7.58871	26.2371	2.1913e-09	1.61837e-07	12.3777
253782	ENSG00000172292	CERS6	ceramide synthase 6	2.81508	5.26869	26.236	2.19205e-09	1.61837e-07	12.4334
10079	ENSG00000054793	ATP9A	ATPase phospholipid transporting 9A (putative)	2.34868	6.08735	26.2328	2.1943e-09	1.61837e-07	12.4083
79874	ENSG00000177548	RABEP2	rabaptin, RAB GTPase binding effector protein 2	-2.25396	5.70312	-26.2166	2.20568e-09	1.62102e-07	12.405
114904	ENSG00000133466	C1QTNF6	C1q and TNF related 6	-2.90085	4.18345	-26.2083	2.2115e-09	1.62102e-07	12.4247
9113	ENSG00000131023	LATS1	large tumor suppressor kinase 1	2.78414	5.2578	26.1976	2.219e-09	1.62102e-07	12.421
653319	ENSG00000196123	MATCAP1	microtubule associated tyrosine carboxypeptidase 1	-3.0316	4.24491	-26.1878	2.22596e-09	1.62102e-07	12.4186
112939	ENSG00000160877	NACC1	nucleus accumbens associated 1	-2.37435	6.5036	-26.1871	2.22644e-09	1.62102e-07	12.3774
55062	ENSG00000070540	WIPI1	WD repeat domain, phosphoinositide interacting 1	2.57177	4.77144	26.1498	2.25309e-09	1.62225e-07	12.4103
10499	ENSG00000140396	NCOA2	nuclear receptor coactivator 2	2.47495	5.29492	26.1458	2.25597e-09	1.62225e-07	12.4011
9685	ENSG00000113282	CLINT1	clathrin interactor 1	2.37514	6.02018	26.1457	2.25604e-09	1.62225e-07	12.3817
23521	ENSG00000142541	RPL13A	ribosomal protein L13a	-3.08716	11.6933	-26.1396	2.26045e-09	1.62225e-07	12.3196
5799	ENSG00000155093	PTPRN2	protein tyrosine phosphatase receptor type N2	4.02847	3.76167	26.1385	2.26126e-09	1.62225e-07	12.2725
4297	ENSG00000118058	KMT2A	lysine methyltransferase 2A	2.34892	7.13334	26.1369	2.26241e-09	1.62225e-07	12.3534
8573	ENSG00000147044	CASK	calcium/calmodulin dependent serine protein kinase	2.395	5.95377	26.1206	2.27421e-09	1.62661e-07	12.3753
5465	ENSG00000186951	PPARA	peroxisome proliferator activated receptor alpha	3.28596	4.47021	26.1004	2.28894e-09	1.63303e-07	12.3836
4205	ENSG00000068305	MEF2A	myocyte enhancer factor 2A	3.23631	5.99143	26.086	2.29953e-09	1.63647e-07	12.3717
85458	ENSG00000150764	DIXDC1	DIX domain containing 1	4.47393	4.20399	26.07	2.31132e-09	1.64075e-07	12.2992
1540	ENSG00000083799	CYLD	CYLD lysine 63 deubiquitinase	2.76116	5.10994	26.0535	2.32355e-09	1.64532e-07	12.377
284371	ENSG00000197608	ZNF841	zinc finger protein 841	2.71582	5.11608	26.0285	2.34224e-09	1.65162e-07	12.3684
7525	ENSG00000176105	YES1	YES proto-oncogene 1, Src family tyrosine kinase	2.18331	5.97632	26.026	2.34409e-09	1.65162e-07	12.3415
83667	ENSG00000130766	SESN2	sestrin 2	2.04817	7.54444	26.0107	2.35562e-09	1.65564e-07	12.3022
121274	ENSG00000167528	ZNF641	zinc finger protein 641	2.53003	5.14786	26.0008	2.36315e-09	1.65683e-07	12.3575
3998	ENSG00000074695	LMAN1	lectin, mannose binding 1	2.18944	6.95232	25.9897	2.37155e-09	1.65862e-07	12.3067
23167	ENSG00000132294	EFR3A	EFR3 homolog A	2.8173	5.01135	25.9652	2.39032e-09	1.66765e-07	12.35
57587	ENSG00000164323	CFAP97	cilia and flagella associated protein 97	2.34253	5.58624	25.9523	2.40022e-09	1.67041e-07	12.3293
7035	ENSG00000003436	TFPI	tissue factor pathway inhibitor	-3.4583	3.46549	-25.9448	2.40604e-09	1.67041e-07	12.2739
55454	ENSG00000169826	CSGALNACT2	chondroitin sulfate N-acetylgalactosaminyltransferase 2	3.11205	4.04482	25.9247	2.42166e-09	1.67715e-07	12.3067
65010	ENSG00000225697	SLC26A6	solute carrier family 26 member 6	-2.65696	4.73427	-25.9112	2.43223e-09	1.67863e-07	12.3311
6170	ENSG00000198918	RPL39	ribosomal protein L39	-2.39325	8.80509	-25.8984	2.44223e-09	1.67863e-07	12.2481
84645	ENSG00000128346	C22orf23	chromosome 22 open reading frame 23	2.46686	5.12754	25.8939	2.44583e-09	1.67863e-07	12.3227
23077	ENSG00000005810	MYCBP2	MYC binding protein 2	2.34887	7.02822	25.89	2.44888e-09	1.67863e-07	12.2729
23328	ENSG00000111961	SASH1	SAM and SH3 domain containing 1	3.07912	4.72891	25.8843	2.45336e-09	1.67863e-07	12.3246
3976	ENSG00000128342	LIF	LIF interleukin 6 family cytokine	3.90831	3.66129	25.8615	2.47146e-09	1.68695e-07	12.182
112574	ENSG00000178996	SNX18	sorting nexin 18	2.79487	5.01023	25.8259	2.50004e-09	1.70236e-07	12.3047
152137	ENSG00000152492	CCDC50	coiled-coil domain containing 50	2.16174	6.33017	25.7807	2.53685e-09	1.72299e-07	12.2504
11224	ENSG00000136942	RPL35	ribosomal protein L35	-3.00894	9.5217	-25.7739	2.54247e-09	1.72299e-07	12.2019
93436	ENSG00000105676	ARMC6	armadillo repeat containing 6	-2.65905	4.87008	-25.76	2.55394e-09	1.72665e-07	12.2791
3178	ENSG00000135486	HNRNPA1	heterogeneous nuclear ribonucleoprotein A1	-2.13497	8.58524	-25.7519	2.56058e-09	1.72702e-07	12.1998
3097	ENSG00000010818	HIVEP2	HIVEP zinc finger 2	2.80217	5.59727	25.7259	2.58227e-09	1.73623e-07	12.2589
9818	ENSG00000139496	NUP58	nucleoporin 58	3.0272	4.63085	25.7125	2.59354e-09	1.73623e-07	12.2687
8925	ENSG00000103657	HERC1	HECT and RLD domain containing E3 ubiquitin protein ligase family member 1	2.70238	6.06292	25.7074	2.59786e-09	1.73623e-07	12.2384
54664	ENSG00000106460	TMEM106B	transmembrane protein 106B	2.61983	5.09214	25.7038	2.60089e-09	1.73623e-07	12.2624
100507303	ENSG00000260260	SNHG19	small nucleolar RNA host gene 19	-4.1596	7.17994	-25.6991	2.60481e-09	1.73623e-07	12.2129
11153	ENSG00000198855	FICD	FIC domain protein adenylyltransferase	2.62706	5.05923	25.6856	2.61631e-09	1.73652e-07	12.2571
83548	ENSG00000136152	COG3	component of oligomeric golgi complex 3	2.77817	5.09538	25.6842	2.61748e-09	1.73652e-07	12.257
808	ENSG00000160014	CALM3	calmodulin 3	-1.98544	7.12738	-25.6697	2.62985e-09	1.73671e-07	12.1895
23670	ENSG00000135048	CEMIP2	cell migration inducing hyaluronidase 2	3.07608	5.05355	25.6636	2.63503e-09	1.73671e-07	12.2527
26353	ENSG00000152137	HSPB8	heat shock protein family B (small) member 8	3.86532	3.75027	25.6624	2.6361e-09	1.73671e-07	12.1482
23360	ENSG00000109920	FNBP4	formin binding protein 4	2.2491	7.02282	25.6293	2.66458e-09	1.75015e-07	12.1841
6187	ENSG00000140988	RPS2	ribosomal protein S2	-2.38599	11.2345	-25.6244	2.66884e-09	1.75015e-07	12.1438
29967	ENSG00000147650	LRP12	LDL receptor related protein 12	3.70309	3.78836	25.5876	2.701e-09	1.76483e-07	12.1446
730051	ENSG00000204514	ZNF814	zinc finger protein 814	-2.57139	4.34564	-25.5733	2.7137e-09	1.76483e-07	12.2247
50999	ENSG00000117500	TMED5	transmembrane p24 trafficking protein 5	2.31922	5.79283	25.5676	2.71874e-09	1.76483e-07	12.1949
9451	ENSG00000172071	EIF2AK3	eukaryotic translation initiation factor 2 alpha kinase 3	3.28464	4.34272	25.565	2.72106e-09	1.76483e-07	12.2097
55125	ENSG00000101639	CEP192	centrosomal protein 192	2.54926	4.74744	25.5636	2.72229e-09	1.76483e-07	12.221
727758	ENSG00000290877	ROCK1P1	Rho associated coiled-coil containing protein kinase 1 pseudogene 1	3.6475	3.64358	25.502	2.77757e-09	1.79656e-07	12.097
8439	ENSG00000035681	NSMAF	neutral sphingomyelinase activation associated factor	2.55594	5.1612	25.4866	2.79164e-09	1.79752e-07	12.1883
124093	ENSG00000162004	CCDC78	coiled-coil domain containing 78	-4.29571	4.55367	-25.4823	2.79555e-09	1.79752e-07	12.1895
55252	ENSG00000143970	ASXL2	ASXL transcriptional regulator 2	2.60873	4.90878	25.4796	2.79805e-09	1.79752e-07	12.1917
10383	ENSG00000188229	TUBB4B	tubulin beta 4B class IVb	-2.2734	7.83403	-25.4583	2.81759e-09	1.80333e-07	12.1076
56288	ENSG00000148498	PARD3	par-3 family cell polarity regulator	2.44217	4.87149	25.4559	2.81979e-09	1.80333e-07	12.1835
51747	ENSG00000108848	LUC7L3	LUC7 like 3 pre-mRNA splicing factor	-2.10141	7.10228	-25.4421	2.83262e-09	1.80401e-07	12.1126
7402	ENSG00000152818	UTRN	utrophin	1.96972	6.97405	25.4359	2.83839e-09	1.80401e-07	12.1171
54726	ENSG00000164164	OTUD4	OTU deubiquitinase 4	2.87894	4.47549	25.4296	2.84423e-09	1.80401e-07	12.1761
9674	ENSG00000235750	KIAA0040	KIAA0040	3.38325	3.7316	25.4274	2.84626e-09	1.80401e-07	12.1074
10260	ENSG00000174485	DENND4A	DENN domain containing 4A	2.60821	5.07585	25.4154	2.85756e-09	1.80419e-07	12.1672
6230	ENSG00000118181	RPS25	ribosomal protein S25	-2.65935	9.55109	-25.4136	2.85925e-09	1.80419e-07	12.0773
55254	ENSG00000176142	TMEM39A	transmembrane protein 39A	2.27629	5.34601	25.3778	2.893e-09	1.82144e-07	12.144
10298	ENSG00000130669	PAK4	p21 (RAC1) activated kinase 4	-1.93769	7.19996	-25.3581	2.91187e-09	1.82926e-07	12.0813
372	ENSG00000095139	ARCN1	archain 1	2.08029	7.63452	25.3429	2.92645e-09	1.83436e-07	12.0734
54206	ENSG00000116285	ERRFI1	ERBB receptor feedback inhibitor 1	3.13639	5.70607	25.3159	2.95258e-09	1.84666e-07	12.1223
114803	ENSG00000162601	MYSM1	Myb like, SWIRM and MPN domains 1	2.76539	4.69242	25.2564	3.01103e-09	1.87411e-07	12.121
155435	ENSG00000184863	RBM33	RNA binding motif protein 33	2.38868	5.75805	25.2535	3.01397e-09	1.87411e-07	12.0904
7779	ENSG00000170385	SLC30A1	solute carrier family 30 member 1	5.55973	4.54847	25.2455	3.02189e-09	1.87411e-07	12.0166
23471	ENSG00000067167	TRAM1	translocation associated membrane protein 1	2.01169	6.7468	25.2445	3.02286e-09	1.87411e-07	12.0566
6181	ENSG00000177600	RPLP2	ribosomal protein lateral stalk subunit P2	-2.78886	9.66457	-25.1999	3.0678e-09	1.89601e-07	12.0025
6202	ENSG00000142937	RPS8	ribosomal protein S8	-2.36361	10.7684	-25.1838	3.08425e-09	1.89601e-07	11.9918
387119	ENSG00000111860	CEP85L	centrosomal protein 85 like	4.37026	3.39733	25.1758	3.09242e-09	1.89601e-07	11.8661
89958	ENSG00000186193	SAPCD2	suppressor APC domain containing 2	-3.34515	5.03702	-25.1751	3.09311e-09	1.89601e-07	12.0864
54542	ENSG00000056586	RC3H2	ring finger and CCCH-type domains 2	3.47097	3.88553	25.1738	3.09442e-09	1.89601e-07	12.0445
81631	ENSG00000140941	MAP1LC3B	microtubule associated protein 1 light chain 3 beta	2.43121	6.6804	25.1701	3.09826e-09	1.89601e-07	12.0359
54845	ENSG00000104413	ESRP1	epithelial splicing regulatory protein 1	1.97845	7.02419	25.1558	3.11292e-09	1.89843e-07	12.0195
4763	ENSG00000196712	NF1	neurofibromin 1	2.12878	5.79366	25.1532	3.11558e-09	1.89843e-07	12.0521
6132	ENSG00000161016	RPL8	ribosomal protein L8	-2.37624	11.0866	-25.1198	3.15038e-09	1.91552e-07	11.9687
116984	ENSG00000047365	ARAP2	ArfGAP with RhoGAP domain, ankyrin repeat and PH domain 2	5.97268	2.87727	25.1087	3.16198e-09	1.91662e-07	11.2519
147339	ENSG00000152242	ARK2N	arkadia (RNF111) N-terminal like PKA signaling regulator 2N	2.58622	5.09401	25.0942	3.17718e-09	1.91662e-07	12.059
57515	ENSG00000111897	SERINC1	serine incorporator 1	2.02082	6.93175	25.0861	3.18579e-09	1.91662e-07	11.9975
9444	ENSG00000112531	QKI	QKI, KH domain containing RNA binding	4.30827	3.60912	25.0813	3.19083e-09	1.91662e-07	11.9039
7559	ENSG00000164631	ZNF12	zinc finger protein 12	2.33381	5.41728	25.0758	3.19675e-09	1.91662e-07	12.0399
85457	ENSG00000198894	CIPC	CLOCK interacting pacemaker	2.17282	5.87302	25.0727	3.2e-09	1.91662e-07	12.0224
10528	ENSG00000101361	NOP56	NOP56 ribonucleoprotein	-1.94225	7.36397	-25.0629	3.21051e-09	1.91662e-07	11.976
1316	ENSG00000067082	KLF6	KLF transcription factor 6	2.44019	5.33524	25.0573	3.21644e-09	1.91662e-07	12.0376
374383	ENSG00000188211	NCR3LG1	natural killer cell cytotoxicity receptor 3 ligand 1	3.25215	4.09209	25.0511	3.22312e-09	1.91662e-07	12.0325
8036	ENSG00000108061	SHOC2	SHOC2 leucine rich repeat scaffold protein	2.26209	5.78807	25.048	3.22642e-09	1.91662e-07	12.0176
400506	ENSG00000103550	KNOP1	lysine rich nucleolar protein 1	-2.26415	5.21702	-25.048	3.22642e-09	1.91662e-07	12.0271
11331	ENSG00000215021	PHB2	prohibitin 2	-2.0038	7.9634	-25.0288	3.24707e-09	1.91984e-07	11.9558
2355	ENSG00000075426	FOSL2	FOS like 2, AP-1 transcription factor subunit	2.27122	5.15149	25.027	3.24903e-09	1.91984e-07	12.031
360023	ENSG00000177888	ZBTB41	zinc finger and BTB domain containing 41	2.98574	4.03607	25.0198	3.2569e-09	1.91984e-07	12.0258
283431	ENSG00000139354	GAS2L3	growth arrest specific 2 like 3	4.46419	3.45483	25.0115	3.2659e-09	1.91984e-07	11.8199
50512	ENSG00000114631	PODXL2	podocalyxin like 2	-2.78552	7.51619	-25.0058	3.27204e-09	1.91984e-07	11.9573
130074	ENSG00000152102	FAM168B	family with sequence similarity 168 member B	1.88789	7.16153	24.9942	3.28477e-09	1.91984e-07	11.9596
728377	NA	ARHGEF34P	Rho guanine nucleotide exchange factor 34, pseudogene	3.21146	3.86748	24.9942	3.28482e-09	1.91984e-07	11.9973
23379	ENSG00000164151	ICE1	interactor of little elongation complex ELL subunit 1	2.58576	5.05973	24.9923	3.28682e-09	1.91984e-07	12.0253
4192	ENSG00000110492	MDK	midkine	-2.69161	5.13307	-24.987	3.29271e-09	1.91984e-07	12.013
6744	ENSG00000138434	ITPRID2	ITPR interacting domain containing 2	2.41525	6.78322	24.9563	3.32661e-09	1.9306e-07	11.9589
51155	ENSG00000189159	JPT1	Jupiter microtubule associated homolog 1	-2.20713	7.34425	-24.9502	3.33339e-09	1.9306e-07	11.9379
23271	ENSG00000118200	CAMSAP2	calmodulin regulated spectrin associated protein family member 2	2.95377	5.8314	24.9491	3.33465e-09	1.9306e-07	11.9906
7057	ENSG00000137801	THBS1	thrombospondin 1	3.10823	4.73577	24.9418	3.34275e-09	1.9306e-07	12.0169
26060	ENSG00000157500	APPL1	adaptor protein, phosphotyrosine interacting with PH domain and leucine zipper 1	2.22971	5.55792	24.9367	3.34847e-09	1.9306e-07	11.9864
57621	ENSG00000181472	ZBTB2	zinc finger and BTB domain containing 2	3.13411	4.34803	24.9263	3.36011e-09	1.9306e-07	12.0066
5378	ENSG00000064933	PMS1	PMS1 homolog 1, mismatch repair system component	2.58639	5.12943	24.9168	3.37084e-09	1.9306e-07	11.9975
84146	ENSG00000122482	ZNF644	zinc finger protein 644	2.3667	5.41918	24.9157	3.37204e-09	1.9306e-07	11.9855
1956	ENSG00000146648	EGFR	epidermal growth factor receptor	3.66097	3.8966	24.9154	3.37234e-09	1.9306e-07	11.9531
867	ENSG00000110395	CBL	Cbl proto-oncogene	2.51278	4.72955	24.8982	3.39188e-09	1.93787e-07	12
10484	ENSG00000100934	SEC23A	SEC23 homolog A, COPII coat complex component	2.16775	5.71188	24.8839	3.40819e-09	1.94328e-07	11.9622
55758	ENSG00000117625	RCOR3	REST corepressor 3	2.19702	5.62875	24.8542	3.44223e-09	1.95772e-07	11.955
79085	ENSG00000125648	SLC25A23	solute carrier family 25 member 23	-2.02586	6.54583	-24.8498	3.44729e-09	1.95772e-07	11.9181
55450	ENSG00000162545	CAMK2N1	calcium/calmodulin dependent protein kinase II inhibitor 1	-3.01968	8.4813	-24.8437	3.45442e-09	1.95785e-07	11.8874
10787	ENSG00000061676	NCKAP1	NCK associated protein 1	2.59685	6.82545	24.8338	3.46592e-09	1.96045e-07	11.9165
399665	ENSG00000167106	EEIG1	estrogen-induced osteoclastogenesis regulator 1	2.2988	7.76057	24.8172	3.48524e-09	1.96505e-07	11.8887
26286	ENSG00000242247	ARFGAP3	ADP ribosylation factor GTPase activating protein 3	2.15883	6.61177	24.8149	3.48789e-09	1.96505e-07	11.9114
26524	ENSG00000150457	LATS2	large tumor suppressor kinase 2	4.59863	3.92251	24.8079	3.49612e-09	1.96579e-07	11.8627
59286	ENSG00000198258	UBL5	ubiquitin like 5	-2.09232	6.9493	-24.7997	3.50581e-09	1.96734e-07	11.8918
8924	ENSG00000128731	HERC2	HECT and RLD domain containing E3 ubiquitin protein ligase 2	4.76151	3.17645	24.7575	3.55592e-09	1.99153e-07	11.6135
23325	ENSG00000136051	WASHC4	WASH complex subunit 4	2.29526	5.20016	24.7428	3.57361e-09	1.99354e-07	11.9322
27163	ENSG00000138744	NAAA	N-acylethanolamine acid amidase	-2.43296	6.58187	-24.7357	3.58215e-09	1.99354e-07	11.8796
57602	ENSG00000055483	USP36	ubiquitin specific peptidase 36	2.32503	6.77989	24.7338	3.58436e-09	1.99354e-07	11.88
55207	ENSG00000134108	ARL8B	ADP ribosylation factor like GTPase 8B	1.95379	6.50128	24.7312	3.58759e-09	1.99354e-07	11.8831
29997	ENSG00000105373	NOP53	NOP53 ribosome biogenesis factor	-2.46428	7.91185	-24.7043	3.62027e-09	2.00071e-07	11.8432
5007	ENSG00000110048	OSBP	oxysterol binding protein	2.3528	6.98325	24.6999	3.62557e-09	2.00071e-07	11.8634
53615	ENSG00000071655	MBD3	methyl-CpG binding domain protein 3	-2.84814	7.29347	-24.6968	3.62935e-09	2.00071e-07	11.8529
91445	ENSG00000138942	RNF185	ring finger protein 185	1.93048	6.52225	24.6923	3.63499e-09	2.00071e-07	11.8686
8621	ENSG00000065883	CDK13	cyclin dependent kinase 13	2.78938	5.81596	24.6916	3.63573e-09	2.00071e-07	11.8996
6674	ENSG00000104450	SPAG1	sperm associated antigen 1	2.8548	4.25134	24.6816	3.64805e-09	2.00083e-07	11.9264
5611	ENSG00000102580	DNAJC3	DnaJ heat shock protein family (Hsp40) member C3	2.36145	5.55946	24.68	3.65005e-09	2.00083e-07	11.8988
5351	ENSG00000083444	PLOD1	procollagen-lysine,2-oxoglutarate 5-dioxygenase 1	-2.01589	6.90425	-24.6578	3.6775e-09	2.00477e-07	11.8421
29761	ENSG00000155313	USP25	ubiquitin specific peptidase 25	2.91106	5.16595	24.6577	3.67771e-09	2.00477e-07	11.9114
50640	ENSG00000135241	PNPLA8	patatin like phospholipase domain containing 8	2.34226	5.00468	24.6571	3.67841e-09	2.00477e-07	11.9095
54778	ENSG00000157450	RNF111	ring finger protein 111	2.65939	4.89076	24.65	3.68727e-09	2.00575e-07	11.9134
91694	ENSG00000154359	LONRF1	LON peptidase N-terminal domain and ring finger 1	3.8102	3.85316	24.6334	3.708e-09	2.01145e-07	11.8533
26118	ENSG00000109046	WSB1	WD repeat and SOCS box containing 1	2.77572	6.31426	24.6274	3.71557e-09	2.01145e-07	11.8602
22843	ENSG00000175175	PPM1E	protein phosphatase, Mg2+/Mn2+ dependent 1E	3.95929	3.30199	24.6246	3.719e-09	2.01145e-07	11.7312
54455	ENSG00000037637	FBXO42	F-box protein 42	2.13712	6.05516	24.6095	3.73807e-09	2.01792e-07	11.8548
3977	ENSG00000113594	LIFR	LIF receptor subunit alpha	3.19363	4.07105	24.5936	3.7583e-09	2.02063e-07	11.8839
9969	ENSG00000108510	MED13	mediator complex subunit 13	2.31398	6.00621	24.5865	3.76741e-09	2.02063e-07	11.8502
332	ENSG00000089685	BIRC5	baculoviral IAP repeat containing 5	-3.00133	3.76997	-24.5829	3.77201e-09	2.02063e-07	11.8878
25831	ENSG00000092148	HECTD1	HECT domain E3 ubiquitin protein ligase 1	2.97207	7.38357	24.5788	3.7772e-09	2.02063e-07	11.8164
6235	ENSG00000213741	RPS29	ribosomal protein S29	-3.23615	8.47103	-24.5776	3.77868e-09	2.02063e-07	11.7936
57510	ENSG00000124571	XPO5	exportin 5	1.92907	7.17305	24.559	3.80262e-09	2.02961e-07	11.8059
5315	ENSG00000067225	PKM	pyruvate kinase M1/2	-2.24576	9.41286	-24.5425	3.82397e-09	2.03718e-07	11.7703
23411	ENSG00000096717	SIRT1	sirtuin 1	3.23758	4.82484	24.5357	3.8329e-09	2.03807e-07	11.8796
220213	ENSG00000165312	OTUD1	OTU deubiquitinase 1	3.35252	4.00619	24.5302	3.83999e-09	2.03807e-07	11.8543
8420	ENSG00000242125	SNHG3	small nucleolar RNA host gene 3	-2.9707	6.79006	-24.522	3.85069e-09	2.03993e-07	11.8028
8826	ENSG00000140575	IQGAP1	IQ motif containing GTPase activating protein 1	2.71559	6.06968	24.5117	3.86418e-09	2.04326e-07	11.8266
79002	ENSG00000123144	TRIR	telomerase RNA component interacting RNase	-2.05228	7.33918	-24.4837	3.90117e-09	2.05899e-07	11.7717
4128	ENSG00000189221	MAOA	monoamine oxidase A	-2.04009	7.14963	-24.476	3.91139e-09	2.05906e-07	11.7724
6224	ENSG00000008988	RPS20	ribosomal protein S20	-2.2025	9.92247	-24.4727	3.91581e-09	2.05906e-07	11.7421
56888	ENSG00000176407	KCMF1	potassium channel modulatory factor 1	2.08131	6.24803	24.4536	3.94136e-09	2.06847e-07	11.793
64795	ENSG00000153561	RMND5A	required for meiotic nuclear division 5 homolog A	2.29928	6.22102	24.4416	3.95762e-09	2.06847e-07	11.7918
9524	ENSG00000099797	TECR	trans-2,3-enoyl-CoA reductase	-2.08434	7.25482	-24.4404	3.95916e-09	2.06847e-07	11.7579
338799	ENSG00000212694	LINC01089	long intergenic non-protein coding RNA 1089	-3.77636	3.26543	-24.4295	3.97395e-09	2.06847e-07	11.7601
6229	ENSG00000138326	RPS24	ribosomal protein S24	-2.36905	10.0517	-24.4275	3.97664e-09	2.06847e-07	11.7254
57688	ENSG00000130449	ZSWIM6	zinc finger SWIM-type containing 6	2.93738	3.95472	24.4269	3.9774e-09	2.06847e-07	11.8289
253461	ENSG00000177311	ZBTB38	zinc finger and BTB domain containing 38	2.84394	4.22979	24.4033	4.00966e-09	2.08143e-07	11.833
51175	ENSG00000074935	TUBE1	tubulin epsilon 1	2.81768	4.86541	24.3976	4.01745e-09	2.08167e-07	11.8286
55102	ENSG00000066739	ATG2B	autophagy related 2B	2.40301	5.19826	24.3895	4.02847e-09	2.08358e-07	11.8107
8897	ENSG00000100330	MTMR3	myotubularin related protein 3	2.40239	5.99367	24.3592	4.07044e-09	2.09412e-07	11.7711
6171	ENSG00000229117	RPL41	ribosomal protein L41	-2.57372	10.262	-24.3577	4.07256e-09	2.09412e-07	11.6995
253959	ENSG00000174373	RALGAPA1	Ral GTPase activating protein catalytic subunit alpha 1	3.20701	5.47052	24.3532	4.07883e-09	2.09412e-07	11.7996
253260	ENSG00000164327	RICTOR	RPTOR independent companion of MTOR complex 2	3.10962	4.14808	24.3492	4.0844e-09	2.09412e-07	11.8092
8712	ENSG00000068985	PAGE1	PAGE family member 1	-4.15089	4.0181	-24.3483	4.08574e-09	2.09412e-07	11.7995
6128	ENSG00000089009	RPL6	ribosomal protein L6	-2.3505	10.3727	-24.3187	4.12727e-09	2.10882e-07	11.6845
23243	ENSG00000206560	ANKRD28	ankyrin repeat domain 28	2.28523	5.69989	24.3173	4.12926e-09	2.10882e-07	11.7652
6124	ENSG00000174444	RPL4	ribosomal protein L4	-1.8061	11.2249	-24.3005	4.15309e-09	2.11718e-07	11.6749
2872	ENSG00000099875	MKNK2	MAPK interacting serine/threonine kinase 2	1.99953	9.11776	24.2871	4.17221e-09	2.12273e-07	11.6811
23335	ENSG00000091157	WDR7	WD repeat domain 7	2.44729	4.58088	24.2817	4.17999e-09	2.12273e-07	11.7915
11101	ENSG00000107669	ATE1	arginyltransferase 1	2.28829	5.00447	24.2714	4.19485e-09	2.12273e-07	11.7745
3840	ENSG00000186432	KPNA4	karyopherin subunit alpha 4	1.95183	6.6005	24.2683	4.1993e-09	2.12273e-07	11.7155
1105	ENSG00000153922	CHD1	chromodomain helicase DNA binding protein 1	2.33281	5.22273	24.263	4.2069e-09	2.12273e-07	11.7643
7203	ENSG00000163468	CCT3	chaperonin containing TCP1 subunit 3	-2.46912	8.28153	-24.2617	4.20884e-09	2.12273e-07	11.6793
65986	ENSG00000205189	ZBTB10	zinc finger and BTB domain containing 10	3.01388	5.63976	24.248	4.22863e-09	2.12496e-07	11.7538
1915	ENSG00000156508	EEF1A1	eukaryotic translation elongation factor 1 alpha 1	-2.04186	12.6683	-24.2441	4.23428e-09	2.12496e-07	11.6553
132660	ENSG00000189308	LIN54	lin-54 DREAM MuvB core complex component	2.84064	4.35785	24.2431	4.2357e-09	2.12496e-07	11.7805
200576	ENSG00000115020	PIKFYVE	phosphoinositide kinase, FYVE-type zinc finger containing	3.04724	4.68942	24.238	4.24323e-09	2.12498e-07	11.7782
5881	ENSG00000169750	RAC3	Rac family small GTPase 3	-2.78493	5.69557	-24.2275	4.25855e-09	2.1289e-07	11.7287
9908	ENSG00000138757	G3BP2	G3BP stress granule assembly factor 2	1.99389	6.86648	24.2101	4.28412e-09	2.13792e-07	11.688
57148	ENSG00000170471	RALGAPB	Ral GTPase activating protein non-catalytic subunit beta	2.42056	6.0606	24.1946	4.30696e-09	2.14343e-07	11.7102
166	ENSG00000104964	TLE5	TLE family member 5, transcriptional modulator	-1.93004	8.2241	-24.1911	4.31218e-09	2.14343e-07	11.653
22999	ENSG00000079841	RIMS1	regulating synaptic membrane exocytosis 1	-2.49654	4.36458	-24.1823	4.32528e-09	2.14343e-07	11.7553
23259	ENSG00000085788	DDHD2	DDHD domain containing 2	3.05086	4.20095	24.1823	4.32535e-09	2.14343e-07	11.7556
55041	ENSG00000115762	PLEKHB2	pleckstrin homology domain containing B2	2.04501	6.13891	24.1308	4.40277e-09	2.16828e-07	11.6803
6633	ENSG00000125743	SNRPD2	small nuclear ribonucleoprotein D2 polypeptide	-2.54948	7.16114	-24.129	4.40554e-09	2.16828e-07	11.6496
9425	ENSG00000153046	CDYL	chromodomain Y like	2.47014	4.75441	24.1271	4.40841e-09	2.16828e-07	11.7339
125144	ENSG00000175061	SNHG29	small nucleolar RNA host gene 29	-2.3786	9.47559	-24.1266	4.4092e-09	2.16828e-07	11.6191
54972	ENSG00000006118	TMEM132A	transmembrane protein 132A	-2.55731	7.06959	-24.1236	4.41369e-09	2.16828e-07	11.6497
223082	ENSG00000180233	ZNRF2	zinc and ring finger 2	2.8983	3.94572	24.1186	4.42132e-09	2.16828e-07	11.7268
5357	ENSG00000120756	PLS1	plastin 1	4.0013	3.85653	24.0579	4.51508e-09	2.20644e-07	11.6553
25978	ENSG00000083937	CHMP2B	charged multivesicular body protein 2B	2.03977	5.62114	24.0543	4.52074e-09	2.20644e-07	11.6709
5763	ENSG00000159335	PTMS	parathymosin	-1.89843	7.9417	-24.0532	4.52245e-09	2.20644e-07	11.6059
7286	ENSG00000143367	TUFT1	tuftelin 1	3.0938	5.639	24.0334	4.55367e-09	2.21476e-07	11.678
26137	ENSG00000181722	ZBTB20	zinc finger and BTB domain containing 20	2.0442	5.77358	24.0325	4.55511e-09	2.21476e-07	11.6573
56929	ENSG00000145780	FEM1C	fem-1 homolog C	2.6598	5.22643	24.0226	4.57062e-09	2.21851e-07	11.6839
11260	ENSG00000184575	XPOT	exportin for tRNA	2.08619	8.52206	24.0102	4.59031e-09	2.22315e-07	11.586
4701	ENSG00000267855	NDUFA7	NADH:ubiquinone oxidoreductase subunit A7	-2.1901	6.33781	-24.0068	4.59585e-09	2.22315e-07	11.6229
140775	ENSG00000176994	SMCR8	SMCR8-C9orf72 complex subunit	3.07776	5.27472	23.998	4.60982e-09	2.22612e-07	11.6793
55601	ENSG00000137628	DDX60	DExD/H-box helicase 60	5.31557	2.66572	23.9841	4.63213e-09	2.23219e-07	11.0306
26010	ENSG00000196141	SPATS2L	spermatogenesis associated serine rich 2 like	2.48729	5.50699	23.9804	4.63812e-09	2.23219e-07	11.6548
6670	ENSG00000172845	SP3	Sp3 transcription factor	2.30452	5.67612	23.9751	4.64666e-09	2.23252e-07	11.6437
84878	ENSG00000119574	ZBTB45	zinc finger and BTB domain containing 45	-2.63773	5.8592	-23.9677	4.65859e-09	2.23429e-07	11.6279
6309	ENSG00000109929	SC5D	sterol-C5-desaturase	2.554	6.55972	23.9631	4.66609e-09	2.23429e-07	11.6119
4089	ENSG00000141646	SMAD4	SMAD family member 4	2.07938	5.69982	23.9505	4.6866e-09	2.2397e-07	11.6309
12	ENSG00000196136	SERPINA3	serpin family A member 3	3.33414	3.52386	23.9464	4.69316e-09	2.2397e-07	11.6163
79661	ENSG00000140398	NEIL1	nei like DNA glycosylase 1	-2.31247	4.75519	-23.9228	4.73192e-09	2.24446e-07	11.6497
55728	ENSG00000078177	N4BP2	NEDD4 binding protein 2	3.19039	3.90678	23.9186	4.7389e-09	2.24446e-07	11.6503
101927125	ENSG00000236081	ELFN1-AS1	ELFN1 antisense RNA 1	-4.66503	2.62419	-23.9168	4.74185e-09	2.24446e-07	11.3429
83931	ENSG00000196182	STK40	serine/threonine kinase 40	1.86759	7.42111	23.912	4.74981e-09	2.24446e-07	11.5659
57761	ENSG00000101255	TRIB3	tribbles pseudokinase 3	2.27628	9.47196	23.907	4.75808e-09	2.24446e-07	11.5397
5205	ENSG00000081923	ATP8B1	ATPase phospholipid transporting 8B1	2.14018	5.51056	23.907	4.75808e-09	2.24446e-07	11.6233
149013	ENSG00000268043	NBPF12	NBPF member 12	2.37203	5.07498	23.9025	4.76557e-09	2.24446e-07	11.6423
56271	ENSG00000102409	BEX4	brain expressed X-linked 4	2.33025	5.01035	23.8965	4.77542e-09	2.24446e-07	11.6422
6154	ENSG00000161970	RPL26	ribosomal protein L26	-2.10917	10.3921	-23.8931	4.7811e-09	2.24446e-07	11.528
84162	ENSG00000138688	BLTP1	bridge-like lipid transfer protein family member 1	3.8118	5.42205	23.8925	4.78217e-09	2.24446e-07	11.6477
8933	ENSG00000134590	RTL8C	retrotransposon Gag like 8C	-2.27367	5.7846	-23.847	4.85871e-09	2.27662e-07	11.5827
3425	ENSG00000127415	IDUA	alpha-L-iduronidase	-2.92644	5.9731	-23.8356	4.87797e-09	2.28188e-07	11.5791
83442	ENSG00000142669	SH3BGRL3	SH3 domain binding glutamate rich protein like 3	-1.99121	5.56458	-23.8227	4.90001e-09	2.28842e-07	11.5792
8635	ENSG00000026297	RNASET2	ribonuclease T2	-2.44516	4.92296	-23.8064	4.92806e-09	2.29774e-07	11.603
57584	ENSG00000107863	ARHGAP21	Rho GTPase activating protein 21	2.48023	5.48764	23.7855	4.96427e-09	2.31083e-07	11.5851
157506	ENSG00000121039	RDH10	retinol dehydrogenase 10	-2.71318	4.85319	-23.754	5.01939e-09	2.3279e-07	11.59
4097	ENSG00000197063	MAFG	MAF bZIP transcription factor G	1.90323	6.44237	23.7507	5.02511e-09	2.3279e-07	11.531
5565	ENSG00000131791	PRKAB2	protein kinase AMP-activated non-catalytic subunit beta 2	2.19671	5.10817	23.7505	5.02554e-09	2.3279e-07	11.5839
9728	ENSG00000138593	SECISBP2L	SECIS binding protein 2 like	2.15769	5.80389	23.7257	5.06935e-09	2.34096e-07	11.5461
1983	ENSG00000100664	EIF5	eukaryotic translation initiation factor 5	1.81106	8.5987	23.7249	5.07074e-09	2.34096e-07	11.4788
5516	ENSG00000104695	PPP2CB	protein phosphatase 2 catalytic subunit beta	2.37912	6.40119	23.7206	5.07847e-09	2.34096e-07	11.526
6193	ENSG00000083845	RPS5	ribosomal protein S5	-2.78878	10.2532	-23.7066	5.10345e-09	2.34742e-07	11.4602
25864	ENSG00000248487	ABHD14A	abhydrolase domain containing 14A	-3.01669	4.15367	-23.7035	5.10901e-09	2.34742e-07	11.5936
114880	ENSG00000079156	OSBPL6	oxysterol binding protein like 6	3.32279	3.63034	23.6971	5.12055e-09	2.34892e-07	11.5485
23429	ENSG00000163602	RYBP	RING1 and YY1 binding protein	2.15374	5.77859	23.6863	5.13996e-09	2.35202e-07	11.5326
6400	ENSG00000071537	SEL1L	SEL1L adaptor subunit of SYVN1 ubiquitin ligase	2.35574	7.00316	23.6802	5.15102e-09	2.35202e-07	11.4936
4550	NA	RNR2	l-rRNA	1.85432	15.8305	23.6796	5.15216e-09	2.35202e-07	11.4594
6134	ENSG00000147403	RPL10	ribosomal protein L10	-2.59591	10.2451	-23.6708	5.16812e-09	2.35543e-07	11.4466
10072	ENSG00000254986	DPP3	dipeptidyl peptidase 3	-2.22804	5.04271	-23.665	5.17857e-09	2.35543e-07	11.5444
22853	ENSG00000164715	LMTK2	lemur tyrosine kinase 2	3.09238	5.56588	23.6586	5.19038e-09	2.35543e-07	11.5458
285141	ENSG00000204334	ERICH2	glutamate rich 2	4.54933	3.21589	23.6572	5.1928e-09	2.35543e-07	11.3431
55651	ENSG00000145912	NHP2	NHP2 ribonucleoprotein	-2.57766	7.28586	-23.6292	5.24442e-09	2.37414e-07	11.4632
6135	ENSG00000142676	RPL11	ribosomal protein L11	-2.34837	9.31822	-23.6257	5.25078e-09	2.37414e-07	11.4347
715	ENSG00000159403	C1R	complement C1r	-3.77057	3.91541	-23.6131	5.27408e-09	2.38088e-07	11.5537
64324	ENSG00000165671	NSD1	nuclear receptor binding SET domain protein 1	1.99004	7.0773	23.5944	5.30912e-09	2.3929e-07	11.4568
2000	ENSG00000102034	ELF4	E74 like ETS transcription factor 4	3.04166	3.84422	23.5791	5.33782e-09	2.40202e-07	11.536
168451	ENSG00000177683	THAP5	THAP domain containing 5	2.57285	5.04964	23.5727	5.34995e-09	2.40319e-07	11.5279
6625	ENSG00000104852	SNRNP70	small nuclear ribonucleoprotein U1 subunit 70	-2.1353	6.86745	-23.5688	5.35735e-09	2.40319e-07	11.4473
57494	ENSG00000166532	RIMKLB	ribosomal modification protein rimK like family member B	2.29284	4.99181	23.5575	5.37872e-09	2.40764e-07	11.52
5170	ENSG00000140992	PDPK1	3-phosphoinositide dependent protein kinase 1	2.23211	5.56004	23.5546	5.38423e-09	2.40764e-07	11.4941
5434	ENSG00000099817	POLR2E	RNA polymerase II, I and III subunit E	-1.72191	7.92722	-23.5457	5.40123e-09	2.40906e-07	11.4176
54822	ENSG00000092439	TRPM7	transient receptor potential cation channel subfamily M member 7	3.44636	5.41319	23.544	5.40437e-09	2.40906e-07	11.5168
5300	ENSG00000127445	PIN1	peptidylprolyl cis/trans isomerase, NIMA-interacting 1	-2.01665	6.02515	-23.5231	5.44442e-09	2.41717e-07	11.4532
9663	ENSG00000101577	LPIN2	lipin 2	2.04784	5.6589	23.5229	5.44495e-09	2.41717e-07	11.4758
11332	ENSG00000097021	ACOT7	acyl-CoA thioesterase 7	-2.72831	4.86085	-23.5181	5.45414e-09	2.41717e-07	11.5049
201562	ENSG00000206527	HACD2	3-hydroxyacyl-CoA dehydratase 2	5.71265	2.55064	23.5168	5.45662e-09	2.41717e-07	10.7342
22990	ENSG00000100731	PCNX1	pecanex 1	2.178	5.70875	23.5077	5.47426e-09	2.42121e-07	11.4699
8462	ENSG00000172059	KLF11	KLF transcription factor 11	2.98874	4.74693	23.4945	5.49995e-09	2.42713e-07	11.5152
4494	ENSG00000198417	MT1F	metallothionein 1F	3.91565	3.27546	23.4897	5.50933e-09	2.42713e-07	11.3821
1937	ENSG00000254772	EEF1G	eukaryotic translation elongation factor 1 gamma	-2.13972	11.3432	-23.4827	5.52302e-09	2.42713e-07	11.372
54944	NA	LINC01521	long intergenic non-protein coding RNA 1521	-4.89809	2.63833	-23.4806	5.52702e-09	2.42713e-07	11.1682
204851	ENSG00000163349	HIPK1	homeodomain interacting protein kinase 1	3.64132	5.48543	23.4762	5.53562e-09	2.42713e-07	11.4926
57708	ENSG00000198160	MIER1	MIER1 transcriptional regulator	2.67623	4.451	23.4746	5.53893e-09	2.42713e-07	11.5116
9453	ENSG00000152904	GGPS1	geranylgeranyl diphosphate synthase 1	1.85139	6.44933	23.4681	5.55166e-09	2.42896e-07	11.4255
9329	ENSG00000125484	GTF3C4	general transcription factor IIIC subunit 4	2.55025	4.26057	23.4615	5.56465e-09	2.43089e-07	11.5085
79646	ENSG00000120137	PANK3	pantothenate kinase 3	2.1634	5.077	23.4476	5.59216e-09	2.43742e-07	11.4745
55183	ENSG00000080345	RIF1	replication timing regulatory factor 1	2.38026	4.67597	23.4449	5.59755e-09	2.43742e-07	11.4925
54832	ENSG00000129003	VPS13C	vacuolar protein sorting 13 homolog C	2.95999	5.35419	23.441	5.60534e-09	2.43742e-07	11.4731
142891	ENSG00000156671	SAMD8	sterile alpha motif domain containing 8	2.02844	5.49958	23.4347	5.6179e-09	2.43915e-07	11.4495
6125	ENSG00000122406	RPL5	ribosomal protein L5	-2.00143	9.30149	-23.427	5.63316e-09	2.44177e-07	11.3596
5208	ENSG00000123836	PFKFB2	6-phosphofructo-2-kinase/fructose-2,6-biphosphatase 2	2.77423	4.73717	23.423	5.64115e-09	2.44177e-07	11.4874
23171	ENSG00000152642	GPD1L	glycerol-3-phosphate dehydrogenase 1 like	2.65381	4.56949	23.4085	5.67029e-09	2.45065e-07	11.4853
84326	ENSG00000130731	METTL26	methyltransferase like 26	-2.41285	6.66531	-23.4041	5.67919e-09	2.45077e-07	11.3927
163882	ENSG00000162852	CNST	consortin, connexin sorting protein	2.15048	5.95489	23.3992	5.68911e-09	2.45133e-07	11.4198
84964	ENSG00000239382	ALKBH6	alkB homolog 6	-2.48105	4.51513	-23.383	5.72212e-09	2.45894e-07	11.4658
51162	ENSG00000172889	EGFL7	EGF like domain multiple 7	-3.04582	5.69251	-23.3796	5.72888e-09	2.45894e-07	11.4232
65125	ENSG00000060237	WNK1	WNK lysine deficient protein kinase 1	3.10295	6.58721	23.3777	5.73277e-09	2.45894e-07	11.4018
7422	ENSG00000112715	VEGFA	vascular endothelial growth factor A	3.13058	8.57779	23.3676	5.7534e-09	2.46115e-07	11.3503
9950	ENSG00000066455	GOLGA5	golgin A5	2.39239	6.13672	23.3641	5.7607e-09	2.46115e-07	11.403
55205	ENSG00000074657	ZNF532	zinc finger protein 532	2.89518	4.59614	23.3625	5.76391e-09	2.46115e-07	11.4705
55818	ENSG00000115548	KDM3A	lysine demethylase 3A	2.85979	5.39449	23.3565	5.77629e-09	2.46273e-07	11.4386
58492	ENSG00000175691	ZNF77	zinc finger protein 77	2.86968	4.13207	23.3492	5.79138e-09	2.46546e-07	11.468
729887	NA	NA	NA	-3.25702	3.40522	-23.3448	5.80049e-09	2.46564e-07	11.4451
60685	ENSG00000156639	ZFAND3	zinc finger AN1-type containing 3	1.88892	7.38114	23.3391	5.81217e-09	2.466e-07	11.3534
54532	ENSG00000145390	USP53	ubiquitin specific peptidase 53	3.24186	3.75692	23.3307	5.82968e-09	2.466e-07	11.4399
155400	ENSG00000291151	NSUN5P1	NSUN5 pseudogene 1	-2.70822	4.46573	-23.3287	5.83379e-09	2.466e-07	11.4505
27445	ENSG00000186472	PCLO	piccolo presynaptic cytomatrix protein	3.84798	3.68116	23.3276	5.83606e-09	2.466e-07	11.4045
5589	ENSG00000130175	PRKCSH	protein kinase C substrate 80K-H	-1.82882	8.39471	-23.3156	5.86117e-09	2.46979e-07	11.3254
8645	ENSG00000164626	KCNK5	potassium two pore domain channel subfamily K member 5	-3.38597	3.12769	-23.315	5.86244e-09	2.46979e-07	11.4036
140893	ENSG00000130701	RBBP8NL	RBBP8 N-terminal like	-4.78633	3.30012	-23.307	5.87922e-09	2.47319e-07	11.3316
8850	ENSG00000114166	KAT2B	lysine acetyltransferase 2B	3.68673	3.46162	23.2983	5.89746e-09	2.47388e-07	11.3712
84153	ENSG00000172922	RNASEH2C	ribonuclease H2 subunit C	-2.48887	5.29929	-23.2979	5.89827e-09	2.47388e-07	11.4017
23157	ENSG00000125354	SEPTIN6	septin 6	-2.36548	4.44214	-23.2932	5.90816e-09	2.47437e-07	11.4346
130507	ENSG00000144357	UBR3	ubiquitin protein ligase E3 component n-recognin 3	2.18418	4.96681	23.2801	5.93601e-09	2.48237e-07	11.4181
28962	ENSG00000081087	OSTM1	osteoclastogenesis associated transmembrane protein 1	2.11839	5.06749	23.2714	5.95446e-09	2.48642e-07	11.4094
115548	ENSG00000157107	FCHO2	FCH and mu domain containing endocytic adaptor 2	3.74794	3.58295	23.2616	5.97537e-09	2.49149e-07	11.373
4172	ENSG00000112118	MCM3	minichromosome maintenance complex component 3	-2.2907	4.74478	-23.2467	6.00733e-09	2.49862e-07	11.4044
90427	ENSG00000104081	BMF	Bcl2 modifying factor	2.08641	5.14048	23.2412	6.01904e-09	2.49862e-07	11.3944
126328	ENSG00000174886	NDUFA11	NADH:ubiquinone oxidoreductase subunit A11	-2.44986	7.17997	-23.2405	6.02053e-09	2.49862e-07	11.3187
285636	ENSG00000205765	RIMOC1	RAB7A interacting MON1-CCZ1 complex subunit 1	2.3891	4.65401	23.2306	6.04208e-09	2.49862e-07	11.4154
10427	ENSG00000138802	SEC24B	SEC24 homolog B, COPII coat complex component	2.43784	5.18752	23.2291	6.04534e-09	2.49862e-07	11.3938
23041	ENSG00000061987	MON2	MON2 homolog, regulator of endosome-to-Golgi trafficking	2.17849	5.56791	23.2273	6.0492e-09	2.49862e-07	11.3716
51320	ENSG00000176624	MEX3C	mex-3 RNA binding family member C	2.82117	5.4097	23.2231	6.05832e-09	2.49862e-07	11.3879
399948	ENSG00000196167	COLCA1	colorectal cancer associated 1	-4.1816	3.63199	-23.221	6.06286e-09	2.49862e-07	11.3909
64087	ENSG00000131844	MCCC2	methylcrotonyl-CoA carboxylase subunit 2	-2.77935	4.73267	-23.1602	6.19644e-09	2.54948e-07	11.3799
79641	ENSG00000067836	ROGDI	rogdi atypical leucine zipper	-2.06216	6.11511	-23.1519	6.21511e-09	2.54948e-07	11.3114
9534	ENSG00000213096	ZNF254	zinc finger protein 254	2.56803	4.18718	23.1482	6.22321e-09	2.54948e-07	11.3972
6165	ENSG00000182899	RPL35A	ribosomal protein L35a	-2.3806	9.38163	-23.1414	6.23861e-09	2.54948e-07	11.2509
9349	ENSG00000125691	RPL23	ribosomal protein L23	-2.9576	9.78168	-23.1408	6.23981e-09	2.54948e-07	11.249
9622	ENSG00000167749	KLK4	kallikrein related peptidase 4	-1.9589	6.65732	-23.1358	6.25104e-09	2.54948e-07	11.2885
25804	ENSG00000130520	LSM4	LSM4 homolog, U6 small nuclear RNA and mRNA degradation associated	-1.82837	6.89004	-23.133	6.25737e-09	2.54948e-07	11.2808
137492	ENSG00000155975	VPS37A	VPS37A subunit of ESCRT-I	2.27005	5.362	23.1327	6.25811e-09	2.54948e-07	11.3469
29952	ENSG00000176978	DPP7	dipeptidyl peptidase 7	-2.30885	8.03744	-23.1181	6.29113e-09	2.55926e-07	11.2559
221079	ENSG00000165997	ARL5B	ADP ribosylation factor like GTPase 5B	2.44147	4.91533	23.0718	6.39692e-09	2.59858e-07	11.3477
121512	ENSG00000139132	FGD4	FYVE, RhoGEF and PH domain containing 4	2.79341	3.84042	23.0655	6.41136e-09	2.60072e-07	11.3619
23198	ENSG00000068878	PSME4	proteasome activator subunit 4	2.03072	6.80719	23.0608	6.42228e-09	2.60143e-07	11.2631
127544	ENSG00000116514	RNF19B	ring finger protein 19B	2.96679	5.10268	23.0483	6.45133e-09	2.60948e-07	11.3394
9044	ENSG00000095564	BTAF1	B-TFIID TATA-box binding protein associated factor 1	2.66493	5.58053	23.0363	6.47933e-09	2.61505e-07	11.3075
6626	ENSG00000077312	SNRPA	small nuclear ribonucleoprotein polypeptide A	-2.19736	5.50419	-23.0345	6.48351e-09	2.61505e-07	11.2909
79595	ENSG00000136715	SAP130	Sin3A associated protein 130	2.03227	5.50961	23.0252	6.50524e-09	2.62009e-07	11.2961
22928	ENSG00000179918	SEPHS2	selenophosphate synthetase 2	1.91773	7.37813	23.0162	6.52646e-09	2.62109e-07	11.2309
6233	ENSG00000143947	RPS27A	ribosomal protein S27a	-2.20473	8.93007	-23.0159	6.52725e-09	2.62109e-07	11.2061
80267	ENSG00000116406	EDEM3	ER degradation enhancing alpha-mannosidase like protein 3	2.57024	4.98836	23.0103	6.54053e-09	2.62109e-07	11.3234
55810	ENSG00000065970	FOXJ2	forkhead box J2	2.63748	4.97706	23.0062	6.55016e-09	2.62109e-07	11.3235
25782	ENSG00000118873	RAB3GAP2	RAB3 GTPase activating non-catalytic protein subunit 2	1.89782	6.55474	23.0044	6.55446e-09	2.62109e-07	11.2477
80346	ENSG00000168476	REEP4	receptor accessory protein 4	-1.99086	5.17255	-23.0007	6.56311e-09	2.62109e-07	11.2901
64598	ENSG00000106330	MOSPD3	motile sperm domain containing 3	-2.23309	4.97719	-22.9832	6.60487e-09	2.63406e-07	11.2951
83742	ENSG00000155254	MARVELD1	MARVEL domain containing 1	-2.54923	4.2059	-22.9783	6.61663e-09	2.63505e-07	11.3288
23329	ENSG00000111490	TBC1D30	TBC1 domain family member 30	2.08504	5.14081	22.9709	6.63442e-09	2.63844e-07	11.2935
51696	ENSG00000112406	HECA	hdc homolog, cell cycle regulator	2.61755	4.47225	22.9535	6.67632e-09	2.64861e-07	11.3222
153241	ENSG00000168944	CEP120	centrosomal protein 120	3.4861	3.66097	22.9525	6.67867e-09	2.64861e-07	11.2916
23373	ENSG00000105662	CRTC1	CREB regulated transcription coactivator 1	-2.06292	5.85995	-22.9458	6.69488e-09	2.65134e-07	11.2421
64784	ENSG00000140577	CRTC3	CREB regulated transcription coactivator 3	1.9654	5.50416	22.9362	6.71832e-09	2.65339e-07	11.2618
8555	ENSG00000081377	CDC14B	cell division cycle 14B	2.97768	3.67819	22.936	6.71875e-09	2.65339e-07	11.3053
9819	ENSG00000196428	TSC22D2	TSC22 domain family member 2	2.57797	4.54804	22.9097	6.78313e-09	2.6751e-07	11.3034
51244	ENSG00000154781	CCDC174	coiled-coil domain containing 174	2.04279	5.52747	22.9053	6.79409e-09	2.6757e-07	11.2502
9262	ENSG00000081320	STK17B	serine/threonine kinase 17b	3.2426	3.38838	22.901	6.80478e-09	2.6762e-07	11.2566
55643	ENSG00000133243	BTBD2	BTB domain containing 2	-2.17552	7.43371	-22.8941	6.82189e-09	2.67876e-07	11.1794
3661	ENSG00000126456	IRF3	interferon regulatory factor 3	-1.83815	6.26393	-22.8872	6.83897e-09	2.67876e-07	11.2042
114822	ENSG00000158106	RHPN1	rhophilin Rho GTPase binding protein 1	-2.57158	6.72702	-22.8869	6.83958e-09	2.67876e-07	11.196
6470	ENSG00000176974	SHMT1	serine hydroxymethyltransferase 1	-2.19521	5.03917	-22.8825	6.8505e-09	2.67934e-07	11.2539
10746	ENSG00000169967	MAP3K2	mitogen-activated protein kinase kinase kinase 2	2.24508	5.27478	22.8763	6.86614e-09	2.68176e-07	11.2542
6398	ENSG00000141574	SECTM1	secreted and transmembrane 1	-3.44315	3.51806	-22.8695	6.88316e-09	2.68472e-07	11.2831
6207	ENSG00000110700	RPS13	ribosomal protein S13	-1.70786	9.17317	-22.8574	6.91339e-09	2.69281e-07	11.1422
5783	ENSG00000163629	PTPN13	protein tyrosine phosphatase non-receptor type 13	2.98771	6.06851	22.853	6.92458e-09	2.6932e-07	11.222
56926	ENSG00000125912	NCLN	nicalin	-2.13657	6.80447	-22.8495	6.93336e-09	2.6932e-07	11.1762
51663	ENSG00000056097	ZFR	zinc finger RNA binding protein	1.84595	6.39142	22.8412	6.95422e-09	2.69761e-07	11.1899
6182	ENSG00000262814	MRPL12	mitochondrial ribosomal protein L12	-2.98555	7.25167	-22.8248	6.99595e-09	2.7101e-07	11.1619
29915	ENSG00000111727	HCFC2	host cell factor C2	2.83859	3.74786	22.8175	7.01472e-09	2.71366e-07	11.2698
27132	ENSG00000178773	CPNE7	copine 7	-2.38827	6.79618	-22.8084	7.03787e-09	2.71569e-07	11.1624
94134	ENSG00000165322	ARHGAP12	Rho GTPase activating protein 12	2.22389	4.69749	22.8079	7.03909e-09	2.71569e-07	11.255
29966	ENSG00000196792	STRN3	striatin 3	2.15025	4.98335	22.7944	7.07404e-09	2.72072e-07	11.2357
1824	ENSG00000134755	DSC2	desmocollin 2	2.493	5.21699	22.7933	7.07686e-09	2.72072e-07	11.23
9973	ENSG00000173992	CCS	copper chaperone for superoxide dismutase	-1.849	6.02025	-22.7917	7.08088e-09	2.72072e-07	11.1756
9972	ENSG00000124789	NUP153	nucleoporin 153	2.66778	4.92078	22.7858	7.09615e-09	2.72291e-07	11.2442
26033	ENSG00000107518	ATRNL1	attractin like 1	4.66258	2.90086	22.7644	7.15185e-09	2.74058e-07	10.9484
55213	ENSG00000136144	RCBTB1	RCC1 and BTB domain containing protein 1	2.19418	5.01259	22.7562	7.17321e-09	2.74376e-07	11.2205
80221	ENSG00000167107	ACSF2	acyl-CoA synthetase family member 2	-2.41951	4.19285	-22.7538	7.17949e-09	2.74376e-07	11.2449
54906	ENSG00000108021	TASOR2	transcription activation suppressor family member 2	2.36276	6.2822	22.7332	7.23375e-09	2.75729e-07	11.158
80781	ENSG00000182871	COL18A1	collagen type XVIII alpha 1 chain	-2.70729	5.31135	-22.7303	7.2415e-09	2.75729e-07	11.1906
215	ENSG00000101986	ABCD1	ATP binding cassette subfamily D member 1	-2.11052	5.68932	-22.7294	7.24403e-09	2.75729e-07	11.1662
135114	ENSG00000111911	HINT3	histidine triad nucleotide binding protein 3	1.93403	5.67874	22.7257	7.25383e-09	2.75733e-07	11.1734
64135	ENSG00000115267	IFIH1	interferon induced with helicase C domain 1	3.845	3.67956	22.7163	7.27877e-09	2.75831e-07	11.198
55589	ENSG00000138756	BMP2K	BMP2 inducible kinase	2.69498	3.97373	22.7159	7.27973e-09	2.75831e-07	11.2406
55773	ENSG00000036054	TBC1D23	TBC1 domain family member 23	2.41366	4.69613	22.7137	7.28555e-09	2.75831e-07	11.2227
51073	ENSG00000105364	MRPL4	mitochondrial ribosomal protein L4	-2.1466	6.90058	-22.703	7.31432e-09	2.76552e-07	11.1171
57111	ENSG00000132698	RAB25	RAB25, member RAS oncogene family	-2.26561	6.56913	-22.6856	7.36105e-09	2.77948e-07	11.1202
23313	ENSG00000100364	KIAA0930	KIAA0930	-2.21009	6.36032	-22.6592	7.43254e-09	2.80275e-07	11.116
85480	ENSG00000145777	TSLP	thymic stromal lymphopoietin	4.76097	2.86039	22.6498	7.45828e-09	2.8054e-07	10.873
191	ENSG00000101444	AHCY	adenosylhomocysteinase	-1.92063	7.764	-22.6494	7.45932e-09	2.8054e-07	11.0776
54976	ENSG00000101220	ADISSP	adipose secreted signaling protein	-2.13496	5.55171	-22.608	7.57377e-09	2.84467e-07	11.1253
23203	ENSG00000165688	PMPCA	peptidase, mitochondrial processing subunit alpha	-2.63762	5.90994	-22.6033	7.58686e-09	2.84582e-07	11.1147
4258	ENSG00000085871	MGST2	microsomal glutathione S-transferase 2	-2.26416	5.0451	-22.5776	7.65899e-09	2.86208e-07	11.1383
284001	ENSG00000176155	CCDC57	coiled-coil domain containing 57	-2.03763	7.37006	-22.575	7.66626e-09	2.86208e-07	11.056
57549	ENSG00000085552	IGSF9	immunoglobulin superfamily member 9	-4.07596	3.51111	-22.5737	7.67006e-09	2.86208e-07	11.1607
81565	ENSG00000166579	NDEL1	nudE neurodevelopment protein 1 like 1	2.09139	5.59886	22.5715	7.67621e-09	2.86208e-07	11.12
54989	ENSG00000198146	ZNF770	zinc finger protein 770	1.84198	6.10534	22.5645	7.6961e-09	2.86208e-07	11.0928
645332	ENSG00000290994	FAM86C2P	family with sequence similarity 86, member A pseudogene	-2.45772	4.2021	-22.5642	7.69677e-09	2.86208e-07	11.1743
5865	ENSG00000169213	RAB3B	RAB3B, member RAS oncogene family	2.33112	5.26138	22.5628	7.70074e-09	2.86208e-07	11.137
6303	ENSG00000130066	SAT1	spermidine/spermine N1-acetyltransferase 1	2.08027	7.78836	22.5497	7.73802e-09	2.86654e-07	11.0428
3664	ENSG00000117595	IRF6	interferon regulatory factor 6	1.73662	6.80763	22.5486	7.74135e-09	2.86654e-07	11.0629
8780	ENSG00000101782	RIOK3	RIO kinase 3	2.05538	6.3605	22.548	7.74303e-09	2.86654e-07	11.0798
57534	ENSG00000101752	MIB1	MIB E3 ubiquitin protein ligase 1	2.19134	4.904	22.5425	7.75862e-09	2.86857e-07	11.1447
6666	ENSG00000177732	SOX12	SRY-box transcription factor 12	-2.68598	6.35974	-22.5191	7.82611e-09	2.88976e-07	11.0659
150696	ENSG00000155066	PROM2	prominin 2	-2.00438	5.07258	-22.493	7.90188e-09	2.9077e-07	11.1012
23348	ENSG00000088387	DOCK9	dedicator of cytokinesis 9	3.10132	4.37688	22.4894	7.91229e-09	2.9077e-07	11.1568
23376	ENSG00000014123	UFL1	UFM1 specific ligase 1	2.25499	5.28943	22.4892	7.91283e-09	2.9077e-07	11.1063
79140	ENSG00000160050	CCDC28B	coiled-coil domain containing 28B	-2.80697	3.64533	-22.4883	7.91566e-09	2.9077e-07	11.1573
80305	ENSG00000170638	TRABD	TraB domain containing	-2.26285	6.54806	-22.4817	7.93475e-09	2.9086e-07	11.0415
64121	ENSG00000116954	RRAGC	Ras related GTP binding C	1.9683	5.5984	22.4804	7.93859e-09	2.9086e-07	11.083
6138	ENSG00000174748	RPL15	ribosomal protein L15	-1.65825	10.7276	-22.4611	7.99549e-09	2.92567e-07	10.9782
64083	ENSG00000113384	GOLPH3	golgi phosphoprotein 3	1.8215	6.26691	22.4456	8.04145e-09	2.93135e-07	11.0404
4644	ENSG00000197535	MYO5A	myosin VA	1.98978	5.47752	22.4402	8.05779e-09	2.93135e-07	11.0734
396	ENSG00000141522	ARHGDIA	Rho GDP dissociation inhibitor alpha	-1.80906	8.33719	-22.4393	8.06048e-09	2.93135e-07	10.9869
9846	ENSG00000033327	GAB2	GRB2 associated binding protein 2	4.58265	3.6421	22.438	8.06435e-09	2.93135e-07	11.051
4214	ENSG00000095015	MAP3K1	mitogen-activated protein kinase kinase kinase 1	3.15046	3.55439	22.4361	8.06992e-09	2.93135e-07	11.1151
1984	ENSG00000132507	EIF5A	eukaryotic translation initiation factor 5A	-1.77118	7.88079	-22.4351	8.07295e-09	2.93135e-07	10.9912
60485	ENSG00000151748	SAV1	salvador family WW domain containing protein 1	2.99509	5.21989	22.4299	8.08857e-09	2.93327e-07	11.1013
6923	ENSG00000103363	ELOB	elongin B	-2.39157	7.40953	-22.4099	8.14858e-09	2.95126e-07	10.9923
374354	ENSG00000196865	NHLRC2	NHL repeat containing 2	2.8774	3.86965	22.3958	8.19157e-09	2.95606e-07	11.1213
79622	ENSG00000161981	SNRNP25	small nuclear ribonucleoprotein U11/U12 subunit 25	-2.53753	5.22344	-22.3957	8.19166e-09	2.95606e-07	11.0633
4636	ENSG00000215375	MYL5	myosin light chain 5	-2.75534	4.39739	-22.3953	8.19305e-09	2.95606e-07	11.1067
100131017	ENSG00000205903	ZNF316	zinc finger protein 316	1.9678	6.85262	22.385	8.22434e-09	2.96358e-07	10.9995
1997	ENSG00000120690	ELF1	E74 like ETS transcription factor 1	4.20519	4.2203	22.3729	8.26144e-09	2.9676e-07	11.1058
54793	ENSG00000104756	KCTD9	potassium channel tetramerization domain containing 9	3.00311	4.21521	22.3712	8.26646e-09	2.9676e-07	11.1141
6129	ENSG00000147604	RPL7	ribosomal protein L7	-2.47129	10.2032	-22.3711	8.26685e-09	2.9676e-07	10.9458
686	ENSG00000169814	BTD	biotinidase	-2.95661	3.7751	-22.3659	8.28292e-09	2.96962e-07	11.1124
55009	ENSG00000228300	FAM174C	family with sequence similarity 174 member C	-2.64248	6.71264	-22.3532	8.32213e-09	2.97991e-07	10.9894
587	ENSG00000105552	BCAT2	branched chain amino acid transaminase 2	-2.52742	6.06371	-22.3391	8.3658e-09	2.9916e-07	11.0045
123096	ENSG00000197119	SLC25A29	solute carrier family 25 member 29	-1.79482	7.12738	-22.3359	8.37586e-09	2.9916e-07	10.9659
51191	ENSG00000138646	HERC5	HECT and RLD domain containing E3 ubiquitin protein ligase 5	4.31326	2.75089	22.3231	8.41578e-09	2.99968e-07	10.8127
10399	ENSG00000204628	RACK1	receptor for activated C kinase 1	-1.90265	11.0275	-22.3193	8.42767e-09	2.99968e-07	10.9213
4501	ENSG00000187193	MT1X	metallothionein 1X	3.34561	6.60605	22.3162	8.43759e-09	2.99968e-07	10.9985
138311	ENSG00000165716	DIPK1B	divergent protein kinase domain 1B	-2.57896	5.35251	-22.3106	8.45499e-09	2.99968e-07	11.0248
3219	ENSG00000170689	HOXB9	homeobox B9	3.12376	3.46201	22.3098	8.4575e-09	2.99968e-07	11.0635
8425	ENSG00000090006	LTBP4	latent transforming growth factor beta binding protein 4	-1.94547	6.03718	-22.3085	8.46185e-09	2.99968e-07	10.9877
8239	ENSG00000124486	USP9X	ubiquitin specific peptidase 9 X-linked	1.89984	6.84464	22.3019	8.48245e-09	3.00323e-07	10.9663
163859	ENSG00000143751	SDE2	SDE2 telomere maintenance homolog	2.59173	4.25836	22.2957	8.50217e-09	3.00647e-07	11.0829
6122	ENSG00000100316	RPL3	ribosomal protein L3	-2.4237	11.6426	-22.2857	8.53375e-09	3.01388e-07	10.9078
283229	ENSG00000177685	CRACR2B	calcium release activated channel regulator 2B	-2.28858	5.8152	-22.274	8.57108e-09	3.0233e-07	10.9859
2064	ENSG00000141736	ERBB2	erb-b2 receptor tyrosine kinase 2	-1.75894	7.53289	-22.2694	8.58586e-09	3.02401e-07	10.9313
6621	ENSG00000165684	SNAPC4	small nuclear RNA activating complex polypeptide 4	-2.29387	5.86282	-22.2668	8.59439e-09	3.02401e-07	10.9813
57669	ENSG00000115109	EPB41L5	erythrocyte membrane protein band 4.1 like 5	2.52597	5.78745	22.2552	8.63172e-09	3.03339e-07	10.9954
6176	ENSG00000137818	RPLP1	ribosomal protein lateral stalk subunit P1	-2.19963	10.751	-22.2462	8.66055e-09	3.03976e-07	10.8934
4713	ENSG00000099795	NDUFB7	NADH:ubiquinone oxidoreductase subunit B7	-2.20271	6.85995	-22.2285	8.71805e-09	3.05616e-07	10.9323
6310	ENSG00000124788	ATXN1	ataxin 1	1.9722	5.78811	22.1868	8.85533e-09	3.09516e-07	10.9596
4605	ENSG00000101057	MYBL2	MYB proto-oncogene like 2	-2.24856	4.40216	-22.1857	8.85882e-09	3.09516e-07	11.019
11135	ENSG00000128283	CDC42EP1	CDC42 effector protein 1	2.4031	5.21729	22.1848	8.862e-09	3.09516e-07	10.9948
84954	ENSG00000008382	MPND	MPN domain containing	-2.44429	4.38382	-22.1651	8.92761e-09	3.11424e-07	11.0148
56913	ENSG00000106392	C1GALT1	core 1 synthase, glycoprotein-N-acetylgalactosamine 3-beta-galactosyltransferase 1	2.64552	4.43483	22.1615	8.93972e-09	3.11464e-07	11.0275
79572	ENSG00000133657	ATP13A3	ATPase 13A3	2.09565	4.98307	22.1562	8.95746e-09	3.117e-07	10.9901
79095	ENSG00000171159	BBLN	bublin coiled coil protein	-2.36431	6.17289	-22.1524	8.9702e-09	3.11761e-07	10.9249
29066	ENSG00000122299	ZC3H7A	zinc finger CCCH-type containing 7A	2.21387	5.32363	22.1389	9.01582e-09	3.12755e-07	10.9673
4090	ENSG00000113658	SMAD5	SMAD family member 5	1.94067	5.34507	22.137	9.02197e-09	3.12755e-07	10.9608
5925	ENSG00000139687	RB1	RB transcriptional corepressor 1	2.78056	4.12995	22.1331	9.03522e-09	3.12755e-07	11.025
6143	ENSG00000108298	RPL19	ribosomal protein L19	-1.95781	10.6664	-22.1309	9.04286e-09	3.12755e-07	10.8471
9686	ENSG00000144560	VGLL4	vestigial like family member 4	3.09137	5.44466	22.1165	9.09186e-09	3.14067e-07	10.9702
9324	ENSG00000118418	HMGN3	high mobility group nucleosomal binding domain 3	-2.77745	4.82096	-22.1128	9.10447e-09	3.14121e-07	10.9781
171568	ENSG00000100413	POLR3H	RNA polymerase III subunit H	-2.00374	5.72611	-22.0878	9.19048e-09	3.16688e-07	10.9132
51429	ENSG00000130340	SNX9	sorting nexin 9	2.24503	5.10065	22.0847	9.20118e-09	3.16688e-07	10.9588
328	ENSG00000100823	APEX1	apurinic/apyrimidinic endodeoxyribonuclease 1	-1.67625	7.64658	-22.0804	9.21623e-09	3.16822e-07	10.8535
135112	ENSG00000111912	NCOA7	nuclear receptor coactivator 7	1.91393	5.36564	22.0746	9.2362e-09	3.17087e-07	10.9347
55620	ENSG00000178078	STAP2	signal transducing adaptor family member 2	-2.37234	6.59553	-22.0717	9.24629e-09	3.17087e-07	10.8788
100132354	ENSG00000289313	LINC01512	long intergenic non-protein coding RNA 1512	3.55942	3.31318	22.0679	9.25951e-09	3.17158e-07	10.9417
23095	ENSG00000054523	KIF1B	kinesin family member 1B	2.01722	6.06796	22.0611	9.28332e-09	3.17549e-07	10.8987
55015	ENSG00000185246	PRPF39	pre-mRNA processing factor 39	2.27816	5.20493	22.0582	9.2933e-09	3.17549e-07	10.9431
84451	ENSG00000143674	MAP3K21	mitogen-activated protein kinase kinase kinase 21	3.59031	3.09004	22.0537	9.30932e-09	3.17714e-07	10.8987
25828	ENSG00000100348	TXN2	thioredoxin 2	-1.82835	7.01249	-22.0301	9.39251e-09	3.2e-07	10.8469
8505	ENSG00000227345	PARG	poly(ADP-ribose) glycohydrolase	2.77297	5.18508	22.0283	9.39882e-09	3.2e-07	10.9427
85462	ENSG00000137460	FHDC1	FH2 domain containing 1	2.49721	4.42852	22.0212	9.42392e-09	3.20427e-07	10.9717
125061	ENSG00000183077	AFMID	arylformamidase	-1.9302	5.08453	-22.0184	9.43396e-09	3.20427e-07	10.9145
133686	ENSG00000152620	NADK2	NAD kinase 2, mitochondrial	1.70252	6.66143	21.9934	9.52337e-09	3.2276e-07	10.8472
8665	ENSG00000175390	EIF3F	eukaryotic translation initiation factor 3 subunit F	-2.01386	7.94946	-21.9928	9.52538e-09	3.2276e-07	10.8146
1495	ENSG00000044115	CTNNA1	catenin alpha 1	1.6715	8.91179	21.9881	9.5423e-09	3.22948e-07	10.8019
28999	ENSG00000163884	KLF15	KLF transcription factor 15	2.04489	5.27821	21.9638	9.63058e-09	3.25343e-07	10.8977
6137	ENSG00000167526	RPL13	ribosomal protein L13	-2.69955	11.1191	-21.9623	9.63597e-09	3.25343e-07	10.779
3400	ENSG00000172201	ID4	inhibitor of DNA binding 4	6.70208	2.43555	21.9561	9.65872e-09	3.25724e-07	9.93197
5757	ENSG00000187514	PTMA	prothymosin alpha	-2.10895	7.92613	-21.9507	9.67821e-09	3.25922e-07	10.7983
64773	ENSG00000132635	PCED1A	PC-esterase domain containing 1A	-2.29873	5.89738	-21.9473	9.69075e-09	3.25922e-07	10.8532
23035	ENSG00000040199	PHLPP2	PH domain and leucine rich repeat protein phosphatase 2	3.24974	4.15941	21.9423	9.70907e-09	3.25922e-07	10.9541
5902	ENSG00000099901	RANBP1	RAN binding protein 1	-1.80617	6.57737	-21.9419	9.71051e-09	3.25922e-07	10.8231
147015	ENSG00000167536	DHRS13	dehydrogenase/reductase 13	-2.29021	6.20916	-21.9387	9.72257e-09	3.25941e-07	10.8377
51157	ENSG00000213015	ZNF580	zinc finger protein 580	-3.20648	5.31058	-21.9276	9.76343e-09	3.2632e-07	10.8872
1291	ENSG00000142156	COL6A1	collagen type VI alpha 1 chain	-2.30404	6.43818	-21.9267	9.76656e-09	3.2632e-07	10.8252
3485	ENSG00000115457	IGFBP2	insulin like growth factor binding protein 2	-2.44048	5.87639	-21.9263	9.76833e-09	3.2632e-07	10.8473
79631	ENSG00000140598	EFL1	elongation factor like GTPase 1	1.96838	5.64931	21.907	9.83988e-09	3.28196e-07	10.8551
10217	ENSG00000144677	CTDSPL	CTD small phosphatase like	-1.98475	5.56453	-21.9049	9.84762e-09	3.28196e-07	10.8471
56904	ENSG00000148341	SH3GLB2	SH3 domain containing GRB2 like, endophilin B2	-1.9708	7.30874	-21.9015	9.86042e-09	3.28238e-07	10.7891
5775	ENSG00000088179	PTPN4	protein tyrosine phosphatase non-receptor type 4	2.08641	4.81719	21.8914	9.89818e-09	3.29002e-07	10.8952
55322	ENSG00000082213	C5orf22	chromosome 5 open reading frame 22	2.25119	4.98856	21.8892	9.90656e-09	3.29002e-07	10.888
101928607	NA	TRPM2-AS	TRPM2 antisense RNA	-2.47705	3.90103	-21.8823	9.93244e-09	3.29179e-07	10.925
53635	ENSG00000104960	PTOV1	PTOV1 extended AT-hook containing adaptor protein	-2.31623	6.99633	-21.8816	9.93506e-09	3.29179e-07	10.7906
3249	ENSG00000105707	HPN	hepsin	-2.14467	6.70107	-21.8676	9.98827e-09	3.30556e-07	10.7919
6160	ENSG00000071082	RPL31	ribosomal protein L31	-2.70243	9.56689	-21.8631	1.00051e-08	3.30688e-07	10.7459
3397	ENSG00000125968	ID1	inhibitor of DNA binding 1	2.99061	3.96353	21.8595	1.00189e-08	3.30688e-07	10.9227
8821	ENSG00000109452	INPP4B	inositol polyphosphate-4-phosphatase type II B	3.76169	3.01088	21.8573	1.00272e-08	3.30688e-07	10.7999
11190	ENSG00000126001	CEP250	centrosomal protein 250	1.85287	7.0899	21.8449	1.00747e-08	3.3176e-07	10.7764
2787	ENSG00000174021	GNG5	G protein subunit gamma 5	-1.64758	6.96642	-21.8427	1.00831e-08	3.3176e-07	10.7716
2289	ENSG00000096060	FKBP5	FKBP prolyl isomerase 5	2.33428	4.56592	21.8355	1.01108e-08	3.32048e-07	10.8909
89891	ENSG00000119333	DYNC2I2	dynein 2 intermediate chain 2	-2.85039	5.99481	-21.8343	1.01152e-08	3.32048e-07	10.8108
23604	ENSG00000035664	DAPK2	death associated protein kinase 2	2.26387	5.31356	21.8074	1.02196e-08	3.35087e-07	10.8381
6574	ENSG00000144136	SLC20A1	solute carrier family 20 member 1	2.10976	5.44372	21.804	1.02325e-08	3.35124e-07	10.8266
4502	ENSG00000125148	MT2A	metallothionein 2A	2.44868	8.04939	21.7998	1.02492e-08	3.35283e-07	10.7406
2308	ENSG00000150907	FOXO1	forkhead box O1	3.20221	3.42637	21.7967	1.02611e-08	3.35286e-07	10.8731
10611	ENSG00000163110	PDLIM5	PDZ and LIM domain 5	1.81164	5.73685	21.787	1.02994e-08	3.35804e-07	10.8006
57634	ENSG00000183495	EP400	E1A binding protein p400	2.02615	6.33653	21.7866	1.03006e-08	3.35804e-07	10.7785
1778	ENSG00000197102	DYNC1H1	dynein cytoplasmic 1 heavy chain 1	1.80226	9.25433	21.782	1.0319e-08	3.35946e-07	10.7153
27161	ENSG00000123908	AGO2	argonaute RISC catalytic component 2	2.00405	5.93144	21.7795	1.03286e-08	3.35946e-07	10.7916
6520	ENSG00000168003	SLC3A2	solute carrier family 3 member 2	2.02993	9.80737	21.7733	1.0353e-08	3.36353e-07	10.7081
7159	ENSG00000143514	TP53BP2	tumor protein p53 binding protein 2	2.18832	5.70828	21.7477	1.04548e-08	3.39274e-07	10.792
92312	ENSG00000254726	MEX3A	mex-3 RNA binding family member A	-3.46529	3.18231	-21.741	1.04816e-08	3.39755e-07	10.8535
83479	ENSG00000118197	DDX59	DEAD-box helicase 59	2.34938	4.50444	21.7278	1.05347e-08	3.41086e-07	10.852
199990	ENSG00000162585	FAAP20	FA core complex associated protein 20	-2.62191	6.22288	-21.7212	1.05612e-08	3.41103e-07	10.7532
8916	ENSG00000138641	HERC3	HECT and RLD domain containing E3 ubiquitin protein ligase 3	5.40296	3.51174	21.7208	1.05628e-08	3.41103e-07	10.7
5864	ENSG00000105649	RAB3A	RAB3A, member RAS oncogene family	-2.60962	4.00943	-21.7175	1.05761e-08	3.41103e-07	10.8591
84900	ENSG00000135119	RNFT2	ring finger protein, transmembrane 2	-3.1668	2.97412	-21.7157	1.05833e-08	3.41103e-07	10.8372
26268	ENSG00000112146	FBXO9	F-box protein 9	-2.03558	5.45161	-21.7114	1.0601e-08	3.41288e-07	10.7752
5649	ENSG00000189056	RELN	reelin	4.2213	3.6415	21.6887	1.06934e-08	3.43873e-07	10.8122
55657	ENSG00000171163	ZNF692	zinc finger protein 692	-2.0137	5.8765	-21.6827	1.07178e-08	3.43937e-07	10.7447
5866	ENSG00000167994	RAB3IL1	RAB3A interacting protein like 1	1.98373	5.80987	21.6805	1.07271e-08	3.43937e-07	10.7569
54904	ENSG00000147548	NSD3	nuclear receptor binding SET domain protein 3	2.27803	6.09421	21.6793	1.07317e-08	3.43937e-07	10.748
828	ENSG00000105519	CAPS	calcyphosine	-2.43034	5.11572	-21.672	1.07621e-08	3.44348e-07	10.7817
6232	ENSG00000177954	RPS27	ribosomal protein S27	-2.23069	10.1115	-21.6703	1.07688e-08	3.44348e-07	10.663
7277	ENSG00000127824	TUBA4A	tubulin alpha 4a	-2.03389	6.28863	-21.6633	1.07978e-08	3.44887e-07	10.7213
991	ENSG00000117399	CDC20	cell division cycle 20	-2.31481	4.79273	-21.6453	1.08725e-08	3.46303e-07	10.7873
3921	ENSG00000168028	RPSA	ribosomal protein SA	-2.50084	11.0727	-21.6441	1.08779e-08	3.46303e-07	10.6489
8638	ENSG00000135114	OASL	2'-5'-oligoadenylate synthetase like	6.46324	2.12439	21.6438	1.08788e-08	3.46303e-07	9.72319
1999	ENSG00000163435	ELF3	E74 like ETS transcription factor 3	1.71428	6.66034	21.6273	1.09478e-08	3.47943e-07	10.6993
23118	ENSG00000055208	TAB2	TGF-beta activated kinase 1 (MAP3K7) binding protein 2	2.79019	5.96042	21.6257	1.09548e-08	3.47943e-07	10.7414
5802	ENSG00000105426	PTPRS	protein tyrosine phosphatase receptor type S	-1.8597	6.81842	-21.6199	1.09791e-08	3.48325e-07	10.686
57544	ENSG00000087301	TXNDC16	thioredoxin domain containing 16	2.60819	4.18542	21.6138	1.10048e-08	3.48752e-07	10.8239
22893	ENSG00000140320	BAHD1	bromo adjacent homology domain containing 1	1.81923	5.85965	21.5969	1.10767e-08	3.5064e-07	10.7182
7984	ENSG00000050327	ARHGEF5	Rho guanine nucleotide exchange factor 5	1.94581	5.53734	21.5834	1.11343e-08	3.51809e-07	10.7303
2730	ENSG00000023909	GCLM	glutamate-cysteine ligase modifier subunit	2.07972	5.24199	21.5808	1.11456e-08	3.51809e-07	10.7475
4645	ENSG00000167306	MYO5B	myosin VB	2.08222	5.74909	21.5781	1.11569e-08	3.51809e-07	10.7198
1512	ENSG00000103811	CTSH	cathepsin H	-2.11737	7.01978	-21.5767	1.11632e-08	3.51809e-07	10.6646
27335	ENSG00000178982	EIF3K	eukaryotic translation initiation factor 3 subunit K	-2.1415	7.7324	-21.5736	1.11763e-08	3.51829e-07	10.648
10609	ENSG00000141696	P3H4	prolyl 3-hydroxylase family member 4 (inactive)	-1.96981	5.98868	-21.565	1.12133e-08	3.52605e-07	10.6919
100500804	ENSG00000284135	MIR3654	microRNA 3654	-2.8027	6.25247	-21.553	1.12654e-08	3.53851e-07	10.6858
51569	ENSG00000120686	UFM1	ubiquitin fold modifier 1	2.45512	5.29012	21.5438	1.13055e-08	3.54717e-07	10.7373
6787	ENSG00000114904	NEK4	NIMA related kinase 4	2.83823	5.05385	21.5374	1.13333e-08	3.55197e-07	10.7572
5271	ENSG00000166401	SERPINB8	serpin family B member 8	3.54745	2.94286	21.5291	1.13696e-08	3.5538e-07	10.6918
79577	ENSG00000134371	CDC73	cell division cycle 73	2.07129	5.48036	21.5258	1.13842e-08	3.5538e-07	10.712
55791	ENSG00000121931	LRIF1	ligand dependent nuclear receptor interacting factor 1	2.04297	5.2442	21.5252	1.13867e-08	3.5538e-07	10.7242
7051	ENSG00000092295	TGM1	transglutaminase 1	2.63909	4.762	21.5246	1.13892e-08	3.5538e-07	10.765
3299	ENSG00000102878	HSF4	heat shock transcription factor 4	-2.51249	4.4226	-21.515	1.14315e-08	3.56308e-07	10.7595
5494	ENSG00000100614	PPM1A	protein phosphatase, Mg2+/Mn2+ dependent 1A	2.07392	5.77255	21.4976	1.15087e-08	3.58323e-07	10.6857
54858	ENSG00000130517	PGPEP1	pyroglutamyl-peptidase I	-1.76614	6.21249	-21.4866	1.15575e-08	3.59447e-07	10.6498
10163	ENSG00000158195	WASF2	WASP family member 2	2.00213	7.13939	21.4815	1.15806e-08	3.59772e-07	10.628
29085	ENSG00000054148	PHPT1	phosphohistidine phosphatase 1	-2.19668	7.30238	-21.4673	1.16443e-08	3.61355e-07	10.6132
84280	ENSG00000148925	BTBD10	BTB domain containing 10	2.23909	4.6613	21.4629	1.16638e-08	3.61476e-07	10.7369
9258	ENSG00000147324	MFHAS1	multifunctional ROCO family signaling regulator 1	2.37019	4.7838	21.4608	1.16737e-08	3.61476e-07	10.7322
4780	ENSG00000116044	NFE2L2	NFE2 like bZIP transcription factor 2	1.973	6.09444	21.4565	1.16928e-08	3.61642e-07	10.653
64844	ENSG00000136536	MARCHF7	membrane associated ring-CH-type finger 7	2.00429	5.48648	21.4539	1.17045e-08	3.61642e-07	10.6813
55049	ENSG00000006015	REX1BD	required for excision 1-B domain containing	-2.86568	5.29693	-21.4458	1.17416e-08	3.62393e-07	10.6884
6016	ENSG00000143622	RIT1	Ras like without CAAX 1	2.62633	4.63353	21.4411	1.17629e-08	3.62657e-07	10.7374
6197	ENSG00000177189	RPS6KA3	ribosomal protein S6 kinase A3	2.01168	4.93656	21.4355	1.17884e-08	3.63048e-07	10.7052
4311	ENSG00000196549	MME	membrane metalloendopeptidase	-1.7554	7.31977	-21.4181	1.18678e-08	3.64737e-07	10.5903
9107	ENSG00000139505	MTMR6	myotubularin related protein 6	2.64495	3.85227	21.4161	1.18772e-08	3.64737e-07	10.7532
57700	ENSG00000151553	FHIP2A	FHF complex subunit HOOK interacting protein 2A	2.46638	4.8688	21.4141	1.18867e-08	3.64737e-07	10.7107
3760	ENSG00000162989	KCNJ3	potassium inwardly rectifying channel subfamily J member 3	-8.15149	1.64589	-21.4106	1.19025e-08	3.64737e-07	9.00662
359948	ENSG00000168264	IRF2BP2	interferon regulatory factor 2 binding protein 2	1.83191	7.50575	21.4096	1.19074e-08	3.64737e-07	10.5878
4084	ENSG00000059728	MXD1	MAX dimerization protein 1	3.19341	3.48965	21.4037	1.19347e-08	3.65178e-07	10.7333
27338	ENSG00000108106	UBE2S	ubiquitin conjugating enzyme E2 S	-1.94324	6.96949	-21.3977	1.19624e-08	3.65233e-07	10.5911
132671	ENSG00000163071	SPATA18	spermatogenesis associated 18	4.37836	2.77344	21.3965	1.19679e-08	3.65233e-07	10.5149
6772	ENSG00000115415	STAT1	signal transducer and activator of transcription 1	1.81089	5.68943	21.3945	1.1977e-08	3.65233e-07	10.6436
6095	ENSG00000069667	RORA	RAR related orphan receptor A	3.67978	3.61535	21.3913	1.1992e-08	3.65233e-07	10.7211
2802	ENSG00000090615	GOLGA3	golgin A3	1.72969	7.48007	21.3894	1.20008e-08	3.65233e-07	10.5794
149371	ENSG00000116903	EXOC8	exocyst complex component 8	2.4859	3.9847	21.3821	1.20351e-08	3.65886e-07	10.7373
157697	ENSG00000104714	ERICH1	glutamate rich 1	2.30998	6.16206	21.3693	1.20951e-08	3.67316e-07	10.6191
57724	ENSG00000152223	EPG5	ectopic P-granules 5 autophagy tethering factor	2.09128	4.99261	21.3562	1.21566e-08	3.68788e-07	10.6713
5097	ENSG00000156453	PCDH1	protocadherin 1	2.27648	4.24179	21.353	1.21719e-08	3.68861e-07	10.715
84343	ENSG00000163755	HPS3	HPS3 biogenesis of lysosomal organelles complex 2 subunit 1	3.71867	4.14075	21.3364	1.22506e-08	3.7085e-07	10.7222
4301	ENSG00000130396	AFDN	afadin, adherens junction formation factor	1.85714	6.69464	21.3279	1.22911e-08	3.71245e-07	10.5765
126917	ENSG00000169991	IFFO2	intermediate filament family orphan 2	2.63622	3.92201	21.324	1.23099e-08	3.71245e-07	10.7168
8871	ENSG00000078269	SYNJ2	synaptojanin 2	3.27933	4.36645	21.3221	1.23191e-08	3.71245e-07	10.7125
254048	ENSG00000157741	UBN2	ubinuclein 2	2.20329	5.24435	21.3219	1.23197e-08	3.71245e-07	10.6448
114799	ENSG00000141446	ESCO1	establishment of sister chromatid cohesion N-acetyltransferase 1	2.44699	5.01204	21.3187	1.23354e-08	3.71245e-07	10.663
9551	ENSG00000241468	ATP5MF	ATP synthase membrane subunit f	-2.51844	6.1948	-21.3173	1.23422e-08	3.71245e-07	10.5877
84725	ENSG00000106086	PLEKHA8	pleckstrin homology domain containing A8	2.35775	4.09022	21.3091	1.23814e-08	3.7195e-07	10.7045
9185	ENSG00000169891	REPS2	RALBP1 associated Eps domain containing 2	-1.94005	5.08356	-21.3069	1.23918e-08	3.7195e-07	10.6286
5524	ENSG00000119383	PTPA	protein phosphatase 2 phosphatase activator	-2.02481	7.73923	-21.3009	1.24208e-08	3.72429e-07	10.5346
5286	ENSG00000011405	PIK3C2A	phosphatidylinositol-4-phosphate 3-kinase catalytic subunit type 2 alpha	2.62641	5.9098	21.2972	1.24387e-08	3.72436e-07	10.6068
1364	ENSG00000189143	CLDN4	claudin 4	-2.49456	6.63619	-21.2955	1.24473e-08	3.72436e-07	10.5627
23473	ENSG00000131375	CAPN7	calpain 7	2.35491	5.56621	21.2916	1.24661e-08	3.72605e-07	10.6172
8202	ENSG00000124151	NCOA3	nuclear receptor coactivator 3	2.15559	5.0236	21.2858	1.24942e-08	3.72847e-07	10.6422
64750	ENSG00000108854	SMURF2	SMAD specific E3 ubiquitin protein ligase 2	2.32413	4.64538	21.2845	1.25005e-08	3.72847e-07	10.6678
254225	ENSG00000166439	RNF169	ring finger protein 169	3.97168	3.63208	21.2709	1.25671e-08	3.74441e-07	10.6696
7083	ENSG00000167900	TK1	thymidine kinase 1	-3.95727	4.62704	-21.2593	1.26243e-08	3.75751e-07	10.6749
7707	ENSG00000163848	ZNF148	zinc finger protein 148	1.90279	5.37473	21.2543	1.26489e-08	3.76088e-07	10.6039
84179	ENSG00000169026	SLC49A3	solute carrier family 49 member 3	-2.76504	4.10687	-21.2503	1.26686e-08	3.7628e-07	10.6736
80164	ENSG00000183248	PRR36	proline rich 36	-2.64957	5.61901	-21.2323	1.2758e-08	3.7854e-07	10.5802
54813	ENSG00000179454	KLHL28	kelch like family member 28	2.66468	4.37807	21.2268	1.27855e-08	3.7896e-07	10.6653
51277	ENSG00000115137	DNAJC27	DnaJ heat shock protein family (Hsp40) member C27	2.80083	3.48841	21.2142	1.28487e-08	3.79826e-07	10.6693
284391	ENSG00000223547	ZNF844	zinc finger protein 844	3.41648	3.42355	21.2122	1.28585e-08	3.79826e-07	10.6484
9500	ENSG00000179222	MAGED1	MAGE family member D1	-2.44461	6.70426	-21.2108	1.28659e-08	3.79826e-07	10.5249
5583	ENSG00000027075	PRKCH	protein kinase C eta	2.09496	5.4421	21.2103	1.28682e-08	3.79826e-07	10.5859
1152	ENSG00000166165	CKB	creatine kinase B	-2.17065	9.6622	-21.2056	1.28921e-08	3.80137e-07	10.4728
220	ENSG00000184254	ALDH1A3	aldehyde dehydrogenase 1 family member A3	2.16354	4.95194	21.1971	1.29346e-08	3.80995e-07	10.6106
4191	ENSG00000146701	MDH2	malate dehydrogenase 2	-1.7723	8.30221	-21.1848	1.29975e-08	3.8245e-07	10.4767
54557	ENSG00000197860	SGTB	small glutamine rich tetratricopeptide repeat co-chaperone beta	3.58288	4.12189	21.1795	1.30245e-08	3.82601e-07	10.6615
126075	ENSG00000183401	CCDC159	coiled-coil domain containing 159	-2.79139	4.73814	-21.1763	1.30405e-08	3.82601e-07	10.61
7090	ENSG00000140332	TLE3	TLE family member 3, transcriptional corepressor	-1.8252	6.84637	-21.1758	1.30431e-08	3.82601e-07	10.5014
4781	ENSG00000147862	NFIB	nuclear factor I B	-1.88833	5.55269	-21.1608	1.31201e-08	3.84464e-07	10.5436
151011	ENSG00000186522	SEPTIN10	septin 10	2.25346	4.21101	21.1222	1.33201e-08	3.89923e-07	10.6237
6541	ENSG00000139514	SLC7A1	solute carrier family 7 member 1	2.71601	6.78398	21.117	1.33477e-08	3.90328e-07	10.4958
202374	ENSG00000169302	STK32A	serine/threonine kinase 32A	3.86918	2.88038	21.1126	1.33709e-08	3.90604e-07	10.5034
7314	ENSG00000170315	UBB	ubiquitin B	-2.21019	9.73122	-21.1071	1.33996e-08	3.9104e-07	10.4309
7167	ENSG00000111669	TPI1	triosephosphate isomerase 1	-2.04329	9.08718	-21.0974	1.34508e-08	3.91955e-07	10.4317
1735	ENSG00000197406	DIO3	iodothyronine deiodinase 3	3.75686	2.75303	21.0959	1.34586e-08	3.91955e-07	10.4802
26234	ENSG00000118564	FBXL5	F-box and leucine rich repeat protein 5	1.76598	5.71374	21.0926	1.34765e-08	3.92012e-07	10.5171
23317	ENSG00000138246	DNAJC13	DnaJ heat shock protein family (Hsp40) member C13	2.00669	5.49975	21.0887	1.34967e-08	3.92012e-07	10.5305
23481	ENSG00000100029	PES1	pescadillo ribosomal biogenesis factor 1	-1.6285	7.21618	-21.0878	1.35019e-08	3.92012e-07	10.4542
147727	ENSG00000267100	ILF3-DT	ILF3 divergent transcript	-1.98201	6.40984	-21.0764	1.35623e-08	3.93361e-07	10.4745
23060	ENSG00000180357	ZNF609	zinc finger protein 609	1.75883	6.39362	21.0597	1.36517e-08	3.9551e-07	10.4742
6314	ENSG00000163635	ATXN7	ataxin 7	2.7181	4.67203	21.0574	1.36642e-08	3.9551e-07	10.5829
8334	ENSG00000180573	H2AC6	H2A clustered histone 6	2.97202	4.35327	21.0427	1.37437e-08	3.97406e-07	10.5974
54877	ENSG00000141664	ZCCHC2	zinc finger CCHC-type containing 2	2.19757	4.76038	21.0387	1.37651e-08	3.97619e-07	10.5583
26512	ENSG00000102786	INTS6	integrator complex subunit 6	2.80199	4.09164	21.0317	1.38036e-08	3.98327e-07	10.5993
7153	ENSG00000131747	TOP2A	DNA topoisomerase II alpha	-2.5929	4.29897	-21.0271	1.38284e-08	3.98637e-07	10.5712
23369	ENSG00000055917	PUM2	pumilio RNA binding family member 2	1.69703	6.43631	21.0222	1.38551e-08	3.99001e-07	10.4562
26872	ENSG00000164647	STEAP1	STEAP family member 1	-1.6804	7.9253	-21.0072	1.39375e-08	4.0072e-07	10.407
348262	ENSG00000225663	MCRIP1	MAPK regulated corepressor interacting protein 1	-2.1347	5.82944	-21.0062	1.3943e-08	4.0072e-07	10.4692
3416	ENSG00000119912	IDE	insulin degrading enzyme	2.04072	5.83776	20.994	1.40106e-08	4.02255e-07	10.4741
339745	ENSG00000144228	SPOPL	speckle type BTB/POZ protein like	2.2714	4.47023	20.9866	1.40515e-08	4.03022e-07	10.5558
27154	ENSG00000096070	BRPF3	bromodomain and PHD finger containing 3	4.31291	5.4594	20.9649	1.41728e-08	4.05941e-07	10.5392
5307	ENSG00000069011	PITX1	paired like homeodomain 1	-2.51192	6.22794	-20.9632	1.41818e-08	4.05941e-07	10.4389
2593	ENSG00000130005	GAMT	guanidinoacetate N-methyltransferase	-2.62107	6.90555	-20.9559	1.42229e-08	4.06707e-07	10.4134
7494	ENSG00000100219	XBP1	X-box binding protein 1	2.09978	8.50837	20.9311	1.43634e-08	4.10311e-07	10.3704
23054	ENSG00000198646	NCOA6	nuclear receptor coactivator 6	1.99728	6.06572	20.9275	1.43838e-08	4.10481e-07	10.435
57211	ENSG00000112414	ADGRG6	adhesion G protein-coupled receptor G6	-2.3471	4.04516	-20.9248	1.43993e-08	4.10509e-07	10.5386
9638	ENSG00000149557	FEZ1	fasciculation and elongation protein zeta 1	5.19955	2.48939	20.914	1.44612e-08	4.11353e-07	10.1054
84823	ENSG00000176619	LMNB2	lamin B2	-1.81771	5.80899	-20.9137	1.4463e-08	4.11353e-07	10.4281
57512	ENSG00000151025	GPR158	G protein-coupled receptor 158	2.4804	4.05865	20.912	1.44723e-08	4.11353e-07	10.5486
29766	ENSG00000138594	TMOD3	tropomodulin 3	2.00079	5.23528	20.9037	1.45203e-08	4.12303e-07	10.4688
7378	ENSG00000183696	UPP1	uridine phosphorylase 1	2.39272	4.96675	20.8996	1.4544e-08	4.12565e-07	10.4927
6102	ENSG00000102218	RP2	RP2 activator of ARL3 GTPase	3.27124	3.01468	20.8943	1.45746e-08	4.13021e-07	10.4939
55573	ENSG00000091527	CDV3	CDV3 homolog	1.57218	7.21576	20.8813	1.465e-08	4.14744e-07	10.3715
130271	ENSG00000152527	PLEKHH2	pleckstrin homology, MyTH4 and FERM domain containing H2	6.08581	2.23464	20.8757	1.46825e-08	4.15112e-07	9.73494
58190	ENSG00000144579	CTDSP1	CTD small phosphatase 1	-1.84565	6.03295	-20.874	1.46923e-08	4.15112e-07	10.4022
8301	ENSG00000073921	PICALM	phosphatidylinositol binding clathrin assembly protein	1.81292	6.26781	20.8647	1.47472e-08	4.16249e-07	10.3975
10623	ENSG00000186141	POLR3C	RNA polymerase III subunit C	1.97707	5.83689	20.8609	1.47693e-08	4.16458e-07	10.4173
9881	ENSG00000168016	TRANK1	tetratricopeptide repeat and ankyrin repeat containing 1	4.2756	2.82942	20.8504	1.48313e-08	4.17792e-07	10.3581
29089	ENSG00000077152	UBE2T	ubiquitin conjugating enzyme E2 T	-2.38386	3.7744	-20.845	1.48629e-08	4.18052e-07	10.5188
9069	ENSG00000157224	CLDN12	claudin 12	1.60729	6.69499	20.8422	1.48793e-08	4.18052e-07	10.3705
90507	ENSG00000141295	SCRN2	secernin 2	-2.23315	4.03813	-20.8413	1.48847e-08	4.18052e-07	10.5028
11120	ENSG00000112763	BTN2A1	butyrophilin subfamily 2 member A1	2.07135	4.56756	20.8366	1.4913e-08	4.18432e-07	10.4843
23764	ENSG00000185022	MAFF	MAF bZIP transcription factor F	2.88312	3.55691	20.8282	1.49625e-08	4.19409e-07	10.5207
23505	ENSG00000075568	TMEM131	transmembrane protein 131	1.95778	5.5467	20.8246	1.4984e-08	4.19595e-07	10.4167
80097	ENSG00000152082	MZT2B	mitotic spindle organizing protein 2B	-2.49112	5.72197	-20.8204	1.50095e-08	4.19895e-07	10.4006
8295	ENSG00000196367	TRRAP	transformation/transcription domain associated protein	2.25867	6.13204	20.8068	1.50907e-08	4.21312e-07	10.385
10460	ENSG00000013810	TACC3	transforming acidic coiled-coil containing protein 3	-2.16303	5.50306	-20.8055	1.50983e-08	4.21312e-07	10.4008
8677	ENSG00000104915	STX10	syntaxin 10	-1.76973	5.52401	-20.8045	1.51046e-08	4.21312e-07	10.3947
23677	ENSG00000130147	SH3BP4	SH3 domain binding protein 4	1.9157	6.17081	20.7979	1.51446e-08	4.21907e-07	10.3746
6155	ENSG00000131469	RPL27	ribosomal protein L27	-2.38577	9.99486	-20.796	1.51557e-08	4.21907e-07	10.2973
80208	ENSG00000104133	SPG11	SPG11 vesicle trafficking associated, spatacsin	1.90014	6.61764	20.7924	1.51777e-08	4.22108e-07	10.3549
200916	ENSG00000163584	RPL22L1	ribosomal protein L22 like 1	-2.5533	7.19384	-20.7834	1.52323e-08	4.23129e-07	10.3314
55604	ENSG00000079691	CARMIL1	capping protein regulator and myosin 1 linker 1	2.14938	4.44743	20.7809	1.52471e-08	4.23129e-07	10.4703
54899	ENSG00000168297	PXK	PX domain containing serine/threonine kinase like	2.46972	4.47293	20.7784	1.52626e-08	4.23129e-07	10.4749
1847	ENSG00000138166	DUSP5	dual specificity phosphatase 5	2.82993	3.43613	20.7765	1.52741e-08	4.23129e-07	10.4979
84277	ENSG00000176410	DNAJC30	DnaJ heat shock protein family (Hsp40) member C30	-1.99744	5.19002	-20.7622	1.53617e-08	4.25143e-07	10.397
1362	ENSG00000108582	CPD	carboxypeptidase D	1.75654	5.99806	20.7578	1.53885e-08	4.25467e-07	10.363
2166	ENSG00000117480	FAAH	fatty acid amide hydrolase	-2.50901	6.55838	-20.7504	1.54342e-08	4.26318e-07	10.3364
5586	ENSG00000065243	PKN2	protein kinase N2	2.11051	4.99385	20.7325	1.55451e-08	4.28713e-07	10.4145
51329	ENSG00000182196	ARL6IP4	ADP ribosylation factor like GTPase 6 interacting protein 4	-1.75955	7.30976	-20.7315	1.55511e-08	4.28713e-07	10.3015
5366	ENSG00000141682	PMAIP1	phorbol-12-myristate-13-acetate-induced protein 1	3.84689	3.75885	20.7257	1.55871e-08	4.29186e-07	10.4721
57092	ENSG00000081154	PCNP	PEST proteolytic signal containing nuclear protein	1.6276	6.63838	20.7239	1.55985e-08	4.29186e-07	10.3222
55435	ENSG00000138660	AP1AR	adaptor related protein complex 1 associated regulatory protein	2.64815	4.11358	20.7153	1.56524e-08	4.30253e-07	10.4694
23382	ENSG00000158467	AHCYL2	adenosylhomocysteinase like 2	2.36814	4.74465	20.7103	1.56837e-08	4.30696e-07	10.4274
9572	ENSG00000126368	NR1D1	nuclear receptor subfamily 1 group D member 1	2.65326	4.5525	20.704	1.57236e-08	4.31194e-07	10.4434
27293	ENSG00000130768	SMPDL3B	sphingomyelin phosphodiesterase acid like 3B	-2.73867	4.8045	-20.7005	1.57452e-08	4.31194e-07	10.4079
11183	ENSG00000012983	MAP4K5	mitogen-activated protein kinase kinase kinase kinase 5	2.26086	4.81215	20.7002	1.57474e-08	4.31194e-07	10.4169
26036	ENSG00000112200	ZNF451	zinc finger protein 451	2.12929	5.59721	20.6875	1.58279e-08	4.3298e-07	10.3594
55783	ENSG00000180917	CMTR2	cap methyltransferase 2	2.44944	4.54398	20.6839	1.58505e-08	4.33182e-07	10.4312
5573	ENSG00000108946	PRKAR1A	protein kinase cAMP-dependent type I regulatory subunit alpha	1.60629	6.55562	20.674	1.59136e-08	4.34486e-07	10.3035
60684	ENSG00000168538	TRAPPC11	trafficking protein particle complex subunit 11	2.14335	4.51097	20.6642	1.59762e-08	4.35776e-07	10.4179
56704	ENSG00000104369	JPH1	junctophilin 1	2.71963	3.74935	20.6565	1.60257e-08	4.36708e-07	10.4547
3313	ENSG00000113013	HSPA9	heat shock protein family A (Hsp70) member 9	1.49965	9.11725	20.6536	1.60443e-08	4.36796e-07	10.2427
54439	ENSG00000091009	RBM27	RNA binding motif protein 27	1.94866	5.00302	20.6157	1.62901e-08	4.43064e-07	10.3614
9448	ENSG00000071054	MAP4K4	mitogen-activated protein kinase kinase kinase kinase 4	1.62592	6.92756	20.6099	1.63286e-08	4.4339e-07	10.2641
10123	ENSG00000188042	ARL4C	ADP ribosylation factor like GTPase 4C	3.3456	3.26135	20.6068	1.63492e-08	4.4339e-07	10.409
6820	ENSG00000088002	SULT2B1	sulfotransferase family 2B member 1	-3.64799	2.62208	-20.604	1.63672e-08	4.4339e-07	10.3594
79590	ENSG00000143314	MRPL24	mitochondrial ribosomal protein L24	-1.69008	7.0064	-20.6034	1.63713e-08	4.4339e-07	10.2535
65268	ENSG00000165238	WNK2	WNK lysine deficient protein kinase 2	-2.11508	5.53696	-20.602	1.63802e-08	4.4339e-07	10.3122
84951	ENSG00000131746	TNS4	tensin 4	4.11172	2.52295	20.5948	1.64282e-08	4.43882e-07	10.2012
8721	ENSG00000107223	EDF1	endothelial differentiation related factor 1	-2.0744	8.49764	-20.5946	1.64296e-08	4.43882e-07	10.2236
10695	ENSG00000137161	CNPY3	canopy FGF signaling regulator 3	-1.8923	6.12314	-20.5802	1.65247e-08	4.46026e-07	10.2739
51524	ENSG00000149483	TMEM138	transmembrane protein 138	-1.98619	5.01633	-20.5765	1.65497e-08	4.46277e-07	10.3285
54861	ENSG00000163788	SNRK	SNF related kinase	2.47465	3.74202	20.5569	1.6681e-08	4.49389e-07	10.4135
284361	ENSG00000161671	EMC10	ER membrane protein complex subunit 10	-1.61089	7.13915	-20.5479	1.67415e-08	4.49741e-07	10.2258
56993	ENSG00000100216	TOMM22	translocase of outer mitochondrial membrane 22	-1.65327	6.37839	-20.5455	1.67576e-08	4.49741e-07	10.2476
8411	ENSG00000102189	EEA1	early endosome antigen 1	2.56335	4.28997	20.5432	1.67731e-08	4.49741e-07	10.3895
8867	ENSG00000159082	SYNJ1	synaptojanin 1	3.0906	3.20804	20.5426	1.67771e-08	4.49741e-07	10.388
51111	ENSG00000110066	KMT5B	lysine methyltransferase 5B	1.78972	5.38935	20.5424	1.67783e-08	4.49741e-07	10.303
140609	ENSG00000151414	NEK7	NIMA related kinase 7	2.33005	4.53238	20.5403	1.67928e-08	4.49741e-07	10.3698
7295	ENSG00000136810	TXN	thioredoxin	-2.65346	6.15991	-20.5385	1.68049e-08	4.49741e-07	10.2627
11143	ENSG00000136504	KAT7	lysine acetyltransferase 7	1.78242	5.48314	20.5279	1.68768e-08	4.5124e-07	10.2914
6201	ENSG00000171863	RPS7	ribosomal protein S7	-2.22177	9.0556	-20.5228	1.69122e-08	4.5176e-07	10.1865
1182	ENSG00000109572	CLCN3	chloride voltage-gated channel 3	2.35719	7.25528	20.5113	1.69903e-08	4.53421e-07	10.2189
84787	ENSG00000133247	KMT5C	lysine methyltransferase 5C	-2.01921	4.65781	-20.5076	1.70162e-08	4.53686e-07	10.3223
5062	ENSG00000180370	PAK2	p21 (RAC1) activated kinase 2	1.6798	6.65446	20.5024	1.70522e-08	4.54202e-07	10.2271
9404	ENSG00000110031	LPXN	leupaxin	2.31229	4.87878	20.4976	1.70847e-08	4.54202e-07	10.3283
9767	ENSG00000102221	JADE3	jade family PHD finger 3	2.53788	4.15006	20.4956	1.70987e-08	4.54202e-07	10.3759
55754	ENSG00000112697	TMEM30A	transmembrane protein 30A	4.04811	3.99784	20.4955	1.70996e-08	4.54202e-07	10.3884
81607	ENSG00000143217	NECTIN4	nectin cell adhesion molecule 4	2.31696	4.89441	20.4891	1.71436e-08	4.54946e-07	10.3235
55633	ENSG00000065491	TBC1D22B	TBC1 domain family member 22B	2.16185	4.51683	20.4836	1.71823e-08	4.55547e-07	10.3424
8853	ENSG00000151693	ASAP2	ArfGAP with SH3 domain, ankyrin repeat and PH domain 2	2.20571	4.83199	20.4808	1.72017e-08	4.55636e-07	10.3219
6189	ENSG00000145425	RPS3A	ribosomal protein S3A	-2.56891	10.4206	-20.4767	1.72304e-08	4.5597e-07	10.1574
26224	ENSG00000005812	FBXL3	F-box and leucine rich repeat protein 3	2.12015	4.45777	20.4732	1.72542e-08	4.56176e-07	10.3412
8612	ENSG00000141934	PLPP2	phospholipid phosphatase 2	-1.75552	6.43001	-20.4386	1.74981e-08	4.62194e-07	10.2003
205717	ENSG00000176542	USF3	upstream transcription factor family member 3	2.33849	4.36197	20.4317	1.75468e-08	4.63048e-07	10.3342
54923	ENSG00000203896	LIME1	Lck interacting transmembrane adaptor 1	-2.234	4.72572	-20.4291	1.75656e-08	4.63116e-07	10.2883
57498	ENSG00000134313	KIDINS220	kinase D interacting substrate 220	2.1797	5.51976	20.4193	1.76359e-08	4.64156e-07	10.2503
158399	ENSG00000173258	ZNF483	zinc finger protein 483	4.0825	2.50225	20.419	1.76378e-08	4.64156e-07	10.1368
160518	ENSG00000170456	DENND5B	DENN domain containing 5B	2.98379	4.55847	20.4142	1.76723e-08	4.64307e-07	10.3314
57600	ENSG00000052795	FNIP2	folliculin interacting protein 2	2.66935	4.48576	20.4136	1.76762e-08	4.64307e-07	10.3269
55766	ENSG00000246705	H2AJ	H2A.J histone	-3.28834	5.18642	-20.4099	1.77027e-08	4.64572e-07	10.2734
55103	ENSG00000116191	RALGPS2	Ral GEF with PH domain and SH3 binding motif 2	2.48791	4.33273	20.407	1.77241e-08	4.64705e-07	10.3288
5238	ENSG00000013375	PGM3	phosphoglucomutase 3	1.90123	5.81688	20.3999	1.77748e-08	4.65604e-07	10.2206
54539	ENSG00000147123	NDUFB11	NADH:ubiquinone oxidoreductase subunit B11	-2.15622	6.68581	-20.3938	1.78194e-08	4.66342e-07	10.1754
23043	ENSG00000154310	TNIK	TRAF2 and NCK interacting kinase	4.01035	2.94356	20.3766	1.79445e-08	4.69184e-07	10.2405
1408	ENSG00000121671	CRY2	cryptochrome circadian regulator 2	1.87022	5.68604	20.3659	1.80227e-08	4.70499e-07	10.2123
84885	ENSG00000160446	ZDHHC12	zinc finger DHHC-type palmitoyltransferase 12	-2.57226	5.05974	-20.3649	1.80296e-08	4.70499e-07	10.2459
51776	ENSG00000091436	MAP3K20	mitogen-activated protein kinase kinase kinase 20	2.14772	4.45549	20.3629	1.80445e-08	4.70499e-07	10.2955
8915	ENSG00000142867	BCL10	BCL10 immune signaling adaptor	2.38976	4.39853	20.3505	1.81358e-08	4.7215e-07	10.2991
57194	ENSG00000206190	ATP10A	ATPase phospholipid transporting 10A (putative)	3.61671	3.65219	20.3498	1.81411e-08	4.7215e-07	10.3246
904	ENSG00000129315	CCNT1	cyclin T1	2.13426	5.36094	20.3407	1.82083e-08	4.73466e-07	10.2252
157680	ENSG00000132549	VPS13B	vacuolar protein sorting 13 homolog B	2.11048	5.03002	20.3314	1.82771e-08	4.74536e-07	10.2422
90784	NA	NA	NA	-2.1899	3.98523	-20.3307	1.82829e-08	4.74536e-07	10.2933
90102	ENSG00000144824	PHLDB2	pleckstrin homology like domain family B member 2	3.57031	2.9669	20.3272	1.83084e-08	4.74765e-07	10.2571
146050	ENSG00000140265	ZSCAN29	zinc finger and SCAN domain containing 29	1.9431	4.8141	20.3242	1.83308e-08	4.74912e-07	10.25
22902	ENSG00000018189	RUFY3	RUN and FYVE domain containing 3	1.83443	5.34657	20.3176	1.83808e-08	4.75772e-07	10.2101
5424	ENSG00000062822	POLD1	DNA polymerase delta 1, catalytic subunit	-2.32822	4.57413	-20.3136	1.84101e-08	4.76093e-07	10.2513
5795	ENSG00000149177	PTPRJ	protein tyrosine phosphatase receptor type J	2.10731	4.83917	20.3114	1.84267e-08	4.76093e-07	10.247
4293	ENSG00000006432	MAP3K9	mitogen-activated protein kinase kinase kinase 9	2.31817	4.61175	20.2988	1.85217e-08	4.77947e-07	10.2623
10614	ENSG00000186834	HEXIM1	HEXIM P-TEFb complex subunit 1	-1.86635	5.42088	-20.296	1.85434e-08	4.77947e-07	10.1837
682	ENSG00000172270	BSG	basigin (Ok blood group)	-1.5352	9.24025	-20.2952	1.8549e-08	4.77947e-07	10.0845
57674	ENSG00000173821	RNF213	ring finger protein 213	1.82243	7.2091	20.2919	1.8574e-08	4.78147e-07	10.1198
84256	ENSG00000059122	FLYWCH1	FLYWCH-type zinc finger 1	1.82244	7.01213	20.2898	1.85904e-08	4.78147e-07	10.1246
4200	ENSG00000082212	ME2	malic enzyme 2	2.87479	6.11263	20.2767	1.86898e-08	4.80038e-07	10.1701
51735	ENSG00000158987	RAPGEF6	Rap guanine nucleotide exchange factor 6	2.01858	5.10981	20.2748	1.87046e-08	4.80038e-07	10.2107
2287	ENSG00000100442	FKBP3	FKBP prolyl isomerase 3	-1.73308	6.00559	-20.2735	1.87147e-08	4.80038e-07	10.1447
4121	ENSG00000111885	MAN1A1	mannosidase alpha class 1A member 1	3.29073	3.75709	20.2584	1.88306e-08	4.82331e-07	10.2942
3326	ENSG00000096384	HSP90AB1	heat shock protein 90 alpha family class B member 1	-1.55731	9.81265	-20.2574	1.8838e-08	4.82331e-07	10.0635
3615	ENSG00000178035	IMPDH2	inosine monophosphate dehydrogenase 2	-1.84142	8.56136	-20.254	1.88645e-08	4.82365e-07	10.0738
10400	ENSG00000133027	PEMT	phosphatidylethanolamine N-methyltransferase	-2.09377	5.70441	-20.2528	1.88733e-08	4.82365e-07	10.1531
84033	ENSG00000154358	OBSCN	obscurin, cytoskeletal calmodulin and titin-interacting RhoGEF	-1.78729	5.81397	-20.2506	1.88904e-08	4.82368e-07	10.1436
80110	ENSG00000142556	ZNF614	zinc finger protein 614	2.57995	3.64302	20.2459	1.89266e-08	4.82857e-07	10.2888
6183	ENSG00000128626	MRPS12	mitochondrial ribosomal protein S12	-1.93261	5.8451	-20.2393	1.89778e-08	4.83481e-07	10.1387
388963	ENSG00000284308	C2orf81	chromosome 2 open reading frame 81	-3.37067	3.18781	-20.2384	1.89851e-08	4.83481e-07	10.281
26278	ENSG00000151835	SACS	sacsin molecular chaperone	2.15709	4.17878	20.2329	1.90276e-08	4.84129e-07	10.2577
84079	ENSG00000105186	ANKRD27	ankyrin repeat domain 27	1.81253	5.44646	20.2304	1.90469e-08	4.84188e-07	10.166
9149	ENSG00000105204	DYRK1B	dual specificity tyrosine phosphorylation regulated kinase 1B	-1.73546	5.54832	-20.2266	1.90768e-08	4.84514e-07	10.1455
54998	ENSG00000175756	AURKAIP1	aurora kinase A interacting protein 1	-2.17168	7.71998	-20.2204	1.91255e-08	4.85315e-07	10.0732
91	ENSG00000135503	ACVR1B	activin A receptor type 1B	2.22919	5.94917	20.2166	1.91551e-08	4.85634e-07	10.14
3157	ENSG00000112972	HMGCS1	3-hydroxy-3-methylglutaryl-CoA synthase 1	1.73836	5.37399	20.2105	1.92033e-08	4.85992e-07	10.1603
8613	ENSG00000162407	PLPP3	phospholipid phosphatase 3	2.98477	4.05214	20.2102	1.92052e-08	4.85992e-07	10.2685
10645	ENSG00000110931	CAMKK2	calcium/calmodulin dependent protein kinase kinase 2	-1.69068	6.00067	-20.2069	1.92318e-08	4.85992e-07	10.1155
2639	ENSG00000105607	GCDH	glutaryl-CoA dehydrogenase	-2.22799	5.10558	-20.204	1.92543e-08	4.85992e-07	10.1671
57683	ENSG00000204186	ZDBF2	zinc finger DBF-type containing 2	3.83266	2.9834	20.2039	1.92548e-08	4.85992e-07	10.1921
57606	ENSG00000109171	SLAIN2	SLAIN motif family member 2	2.8626	5.69263	20.1965	1.93141e-08	4.87055e-07	10.1592
3434	ENSG00000185745	IFIT1	interferon induced protein with tetratricopeptide repeats 1	4.17375	3.13151	20.1927	1.93439e-08	4.87374e-07	10.1863
154	ENSG00000169252	ADRB2	adrenoceptor beta 2	-4.50907	1.89355	-20.1884	1.93778e-08	4.87772e-07	9.91917
388403	ENSG00000175155	YPEL2	yippee like 2	2.74653	4.02729	20.1864	1.93941e-08	4.87772e-07	10.2561
4609	ENSG00000136997	MYC	MYC proto-oncogene, bHLH transcription factor	-3.34144	5.98566	-20.1797	1.94476e-08	4.88581e-07	10.1271
51566	ENSG00000102401	ARMCX3	armadillo repeat containing X-linked 3	1.74824	6.13777	20.178	1.94607e-08	4.88581e-07	10.1069
27032	ENSG00000017260	ATP2C1	ATPase secretory pathway Ca2+ transporting 1	1.97737	6.22583	20.1719	1.95094e-08	4.89096e-07	10.1035
353	ENSG00000198931	APRT	adenine phosphoribosyltransferase	-2.38193	7.25686	-20.1696	1.95284e-08	4.89096e-07	10.0625
9380	ENSG00000137106	GRHPR	glyoxylate and hydroxypyruvate reductase	-1.6619	7.03	-20.1663	1.95543e-08	4.89096e-07	10.0625
6573	ENSG00000173638	SLC19A1	solute carrier family 19 member 1	-3.49061	4.57347	-20.1662	1.95555e-08	4.89096e-07	10.2158
8666	ENSG00000130811	EIF3G	eukaryotic translation initiation factor 3 subunit G	-1.55025	8.1202	-20.1647	1.95673e-08	4.89096e-07	10.0398
27346	ENSG00000109084	TMEM97	transmembrane protein 97	-1.75022	5.06858	-20.1143	1.99773e-08	4.98904e-07	10.1233
54708	ENSG00000198060	MARCHF5	membrane associated ring-CH-type finger 5	1.67994	5.72569	20.1016	2.00822e-08	5.00702e-07	10.0921
6223	ENSG00000105372	RPS19	ribosomal protein S19	-2.32381	9.59605	-20.1013	2.00845e-08	5.00702e-07	9.99705
56957	ENSG00000264522	OTUD7B	OTU deubiquitinase 7B	2.11266	5.824	20.0873	2.0201e-08	5.03164e-07	10.0879
54790	ENSG00000168769	TET2	tet methylcytosine dioxygenase 2	3.17037	4.24503	20.0824	2.02416e-08	5.03408e-07	10.2107
22930	ENSG00000115839	RAB3GAP1	RAB3 GTPase activating protein catalytic subunit 1	1.8126	6.24935	20.0818	2.02462e-08	5.03408e-07	10.0607
84897	ENSG00000154144	TBRG1	transforming growth factor beta regulator 1	1.61083	6.63882	20.0772	2.02855e-08	5.03942e-07	10.0414
4726	ENSG00000145494	NDUFS6	NADH:ubiquinone oxidoreductase subunit S6	-1.83143	6.57905	-20.0678	2.03637e-08	5.05445e-07	10.0336
57659	ENSG00000174282	ZBTB4	zinc finger and BTB domain containing 4	1.62571	6.17238	20.0476	2.05345e-08	5.0923e-07	10.0465
26959	ENSG00000105856	HBP1	HMG-box transcription factor 1	2.7303	4.61465	20.0455	2.05521e-08	5.0923e-07	10.1642
9567	ENSG00000100226	GTPBP1	GTP binding protein 1	1.97678	6.72214	20.0428	2.05748e-08	5.09347e-07	10.0272
54929	ENSG00000064545	TMEM161A	transmembrane protein 161A	-2.59688	5.70499	-20.0383	2.06135e-08	5.09862e-07	10.0663
26750	ENSG00000136643	RPS6KC1	ribosomal protein S6 kinase C1	2.54285	5.1167	20.0331	2.06575e-08	5.09993e-07	10.1184
513	ENSG00000099624	ATP5F1D	ATP synthase F1 subunit delta	-3.05232	7.64077	-20.0322	2.06655e-08	5.09993e-07	9.99731
25998	ENSG00000005700	IBTK	inhibitor of Bruton tyrosine kinase	1.78126	5.56279	20.0314	2.06727e-08	5.09993e-07	10.0719
23231	ENSG00000091490	SEL1L3	SEL1L family member 3	1.71595	6.80138	20.0139	2.08227e-08	5.13246e-07	10.0089
580	ENSG00000138376	BARD1	BRCA1 associated RING domain 1	-1.80808	5.08979	-20.0068	2.08836e-08	5.14302e-07	10.0758
6604	ENSG00000082014	SMARCD3	SWI/SNF related, matrix associated, actin dependent regulator of chromatin, subfamily d, member 3	-1.7964	5.35417	-20.0022	2.09238e-08	5.14845e-07	10.0582
143384	ENSG00000151893	CACUL1	CDK2 associated cullin domain 1	1.89283	5.13643	19.9964	2.09739e-08	5.15632e-07	10.0852
55432	ENSG00000180667	YOD1	YOD1 deubiquitinase	2.05176	4.4946	19.9927	2.10058e-08	5.15656e-07	10.1326
283651	NA	HMGN2P46	high mobility group nucleosomal binding domain 2 pseudogene 46	-2.75885	3.64915	-19.9921	2.10113e-08	5.15656e-07	10.1767
345778	ENSG00000177034	MTX3	metaxin 3	1.89269	5.44296	19.9797	2.11192e-08	5.17512e-07	10.0583
8310	ENSG00000087008	ACOX3	acyl-CoA oxidase 3, pristanoyl	1.85188	4.93498	19.9793	2.11233e-08	5.17512e-07	10.0908
117584	ENSG00000092871	RFFL	ring finger and FYVE like domain containing E3 ubiquitin protein ligase	4.0305	2.44009	19.9747	2.1163e-08	5.17936e-07	9.96809
7593	ENSG00000099326	MZF1	myeloid zinc finger 1	-1.93212	5.80755	-19.9731	2.11771e-08	5.17936e-07	10.0237
6450	ENSG00000185437	SH3BGR	SH3 domain binding glutamate rich protein	2.41369	4.51522	19.9672	2.12292e-08	5.18605e-07	10.1301
1945	ENSG00000243364	EFNA4	ephrin A4	-2.20988	3.92896	-19.9659	2.1241e-08	5.18605e-07	10.142
79759	ENSG00000167394	ZNF668	zinc finger protein 668	-2.76244	3.93093	-19.9621	2.12745e-08	5.18978e-07	10.1512
11247	ENSG00000182379	NXPH4	neurexophilin 4	-1.73092	5.49067	-19.9252	2.16024e-08	5.26523e-07	10.0162
10226	ENSG00000105355	PLIN3	perilipin 3	-1.68487	5.53803	-19.9199	2.16499e-08	5.27229e-07	10.011
27443	ENSG00000099954	CECR2	CECR2 histone acetyl-lysine reader	3.85411	2.92776	19.9173	2.16735e-08	5.27352e-07	10.0771
23158	ENSG00000109436	TBC1D9	TBC1 domain family member 9	1.69716	5.61503	19.9114	2.17269e-08	5.2806e-07	10.0147
3159	ENSG00000137309	HMGA1	high mobility group AT-hook 1	-1.8378	6.93431	-19.91	2.17398e-08	5.2806e-07	9.95256
54454	ENSG00000119778	ATAD2B	ATPase family AAA domain containing 2B	3.03093	3.69451	19.9058	2.17771e-08	5.2841e-07	10.1496
157638	ENSG00000168672	LRATD2	LRAT domain containing 2	1.83062	6.10182	19.9043	2.17914e-08	5.2841e-07	9.98908
26504	ENSG00000158158	CNNM4	cyclin and CBS domain divalent metal cation transport mediator 4	2.51884	5.68028	19.8947	2.18786e-08	5.29817e-07	10.0198
23087	ENSG00000104228	TRIM35	tripartite motif containing 35	2.62737	4.86144	19.8938	2.18868e-08	5.29817e-07	10.0785
51100	ENSG00000097033	SH3GLB1	SH3 domain containing GRB2 like, endophilin B1	1.68212	5.76152	19.8834	2.19813e-08	5.31391e-07	9.99416
4716	ENSG00000140990	NDUFB10	NADH:ubiquinone oxidoreductase subunit B10	-1.86015	7.33469	-19.8826	2.19892e-08	5.31391e-07	9.93006
5095	ENSG00000175198	PCCA	propionyl-CoA carboxylase subunit alpha	2.21634	4.46362	19.8761	2.20487e-08	5.31507e-07	10.0888
7763	ENSG00000107372	ZFAND5	zinc finger AN1-type containing 5	2.07467	6.99295	19.8727	2.20799e-08	5.31507e-07	9.9435
3310	ENSG00000173110	HSPA6	heat shock protein family A (Hsp70) member 6	2.52223	3.72072	19.8726	2.20809e-08	5.31507e-07	10.132
24142	ENSG00000243477	NAA80	N-alpha-acetyltransferase 80, NatH catalytic subunit	-2.58262	3.12693	-19.8698	2.21061e-08	5.31507e-07	10.1348
6725	ENSG00000125508	SRMS	src-related kinase lacking C-terminal regulatory tyrosine and N-terminal myristylation sites	-4.13721	2.00761	-19.8686	2.21173e-08	5.31507e-07	9.90617
4637	ENSG00000092841	MYL6	myosin light chain 6	-2.03341	9.05655	-19.8681	2.21222e-08	5.31507e-07	9.89727
91369	ENSG00000154945	ANKRD40	ankyrin repeat domain 40	1.82976	5.6383	19.8673	2.21291e-08	5.31507e-07	9.9961
80216	ENSG00000073331	ALPK1	alpha kinase 1	2.75319	4.45899	19.8657	2.21438e-08	5.31507e-07	10.0978
51426	ENSG00000122008	POLK	DNA polymerase kappa	2.75353	4.39009	19.8567	2.22274e-08	5.33063e-07	10.0981
54487	ENSG00000128191	DGCR8	DGCR8 microprocessor complex subunit	-2.08926	5.07843	-19.8544	2.22482e-08	5.33112e-07	10.0137
3020	ENSG00000163041	H3-3A	H3.3 histone A	-1.65883	7.21256	-19.8472	2.23153e-08	5.34269e-07	9.91615
144108	ENSG00000179119	SPTY2D1	SPT2 chromatin protein domain containing 1	2.04242	5.13255	19.8437	2.23483e-08	5.34609e-07	10.0222
55311	ENSG00000167685	ZNF444	zinc finger protein 444	-2.1287	6.50457	-19.8358	2.24218e-08	5.35602e-07	9.93565
905	ENSG00000082258	CCNT2	cyclin T2	2.06928	4.66334	19.8352	2.24276e-08	5.35602e-07	10.0524
54878	ENSG00000074603	DPP8	dipeptidyl peptidase 8	1.93232	5.11165	19.8287	2.24889e-08	5.36468e-07	10.0144
81846	ENSG00000133812	SBF2	SET binding factor 2	2.63778	4.90145	19.8245	2.25284e-08	5.36468e-07	10.0456
4286	ENSG00000187098	MITF	melanocyte inducing transcription factor	2.11131	4.71872	19.8239	2.25332e-08	5.36468e-07	10.0448
5178	ENSG00000198300	PEG3	paternally expressed 3	-1.49319	7.32658	-19.8218	2.25531e-08	5.36468e-07	9.9014
79004	ENSG00000107874	CUEDC2	CUE domain containing 2	-1.89124	6.96818	-19.8213	2.25583e-08	5.36468e-07	9.91229
55209	ENSG00000168137	SETD5	SET domain containing 5	1.76053	7.85606	19.8139	2.26281e-08	5.375e-07	9.89207
6168	ENSG00000197756	RPL37A	ribosomal protein L37a	-2.58931	10.2638	-19.8127	2.26395e-08	5.375e-07	9.86416
1173	ENSG00000161203	AP2M1	adaptor related protein complex 2 subunit mu 1	-1.56922	8.19056	-19.7988	2.27708e-08	5.39969e-07	9.87575
26960	ENSG00000172915	NBEA	neurobeachin	4.25619	2.69254	19.7977	2.27816e-08	5.39969e-07	9.94491
2804	ENSG00000173230	GOLGB1	golgin B1	1.59305	8.12299	19.7948	2.28096e-08	5.40127e-07	9.8777
8125	ENSG00000140350	ANP32A	acidic nuclear phosphoprotein 32 family member A	-1.57162	6.95341	-19.793	2.28264e-08	5.40127e-07	9.89818
121536	ENSG00000139154	AEBP2	AE binding protein 2	2.65395	4.51932	19.791	2.28458e-08	5.40127e-07	10.059
9559	ENSG00000122958	VPS26A	VPS26 retromer complex component A	1.7369	6.15416	19.789	2.28643e-08	5.40127e-07	9.93416
23431	ENSG00000081014	AP4E1	adaptor related protein complex 4 subunit epsilon 1	2.5279	3.72105	19.7859	2.28943e-08	5.40152e-07	10.0954
2067	ENSG00000012061	ERCC1	ERCC excision repair 1, endonuclease non-catalytic subunit	-1.96988	5.18738	-19.785	2.29034e-08	5.40152e-07	9.97424
23352	ENSG00000127481	UBR4	ubiquitin protein ligase E3 component n-recognin 4	1.7358	7.53364	19.7825	2.29274e-08	5.40267e-07	9.88484
25911	ENSG00000166171	DPCD	deleted in primary ciliary dyskinesia homolog (mouse)	-2.18907	5.24239	-19.7743	2.30061e-08	5.41668e-07	9.96937
256302	ENSG00000274180	NATD1	N-acetyltransferase domain containing 1	2.36969	4.92955	19.7723	2.30249e-08	5.41668e-07	10.0133
2771	ENSG00000114353	GNAI2	G protein subunit alpha i2	-1.79968	6.33585	-19.7621	2.31236e-08	5.43539e-07	9.90611
51496	ENSG00000137770	CTDSPL2	CTD small phosphatase like 2	2.08892	4.57352	19.7546	2.31959e-08	5.44212e-07	10.0243
1020	ENSG00000164885	CDK5	cyclin dependent kinase 5	-2.01346	4.97522	-19.7546	2.31959e-08	5.44212e-07	9.97493
9931	ENSG00000198265	HELZ	helicase with zinc finger	1.76845	5.21388	19.7532	2.32097e-08	5.44212e-07	9.97032
51646	ENSG00000119801	YPEL5	yippee like 5	1.83467	5.44505	19.7423	2.33164e-08	5.45973e-07	9.95227
1445	ENSG00000103653	CSK	C-terminal Src kinase	-1.83115	5.94766	-19.7416	2.33233e-08	5.45973e-07	9.91316
222223	ENSG00000164659	ELAPOR2	endosome-lysosome associated apoptosis and autophagy regulator family member 2	1.91866	4.92151	19.73	2.34366e-08	5.48081e-07	9.98368
23063	ENSG00000062650	WAPL	WAPL cohesin release factor	1.89992	4.96853	19.7285	2.34519e-08	5.48081e-07	9.97909
25820	ENSG00000166233	ARIH1	ariadne RBR E3 ubiquitin protein ligase 1	2.15054	6.00635	19.7202	2.35335e-08	5.49535e-07	9.9165
6817	ENSG00000196502	SULT1A1	sulfotransferase family 1A member 1	-1.83047	4.95199	-19.7104	2.36302e-08	5.51328e-07	9.95408
57763	ENSG00000164331	ANKRA2	ankyrin repeat family A member 2	2.1983	4.64044	19.7085	2.36491e-08	5.51328e-07	10.0024
9650	ENSG00000066855	MTFR1	mitochondrial fission regulator 1	1.77627	5.62016	19.7059	2.36746e-08	5.5147e-07	9.9246
3344	ENSG00000170802	FOXN2	forkhead box N2	3.21283	3.23816	19.6884	2.38496e-08	5.54863e-07	10.0473
25953	ENSG00000127838	PNKD	PNKD metallo-beta-lactamase domain containing	-2.27176	5.65943	-19.6874	2.38594e-08	5.54863e-07	9.90817
59338	ENSG00000107679	PLEKHA1	pleckstrin homology domain containing A1	2.46213	4.29653	19.6826	2.39076e-08	5.55529e-07	10.0226
360205	ENSG00000229637	PRAC2	PRAC2 small nuclear protein	-3.78706	2.8337	-19.6754	2.39804e-08	5.56523e-07	10.0235
29925	ENSG00000173540	GMPPB	GDP-mannose pyrophosphorylase B	1.66549	5.77821	19.6745	2.39896e-08	5.56523e-07	9.89988
105375039	NA	NA	NA	4.54151	2.57914	19.6684	2.40512e-08	5.56832e-07	9.82942
5621	ENSG00000171867	PRNP	prion protein	2.40668	6.84053	19.668	2.40556e-08	5.56832e-07	9.8609
84444	ENSG00000104885	DOT1L	DOT1 like histone lysine methyltransferase	1.66381	6.69993	19.6659	2.40769e-08	5.56832e-07	9.85632
9321	ENSG00000100815	TRIP11	thyroid hormone receptor interactor 11	1.8765	6.04652	19.6654	2.40813e-08	5.56832e-07	9.88558
51278	ENSG00000162783	IER5	immediate early response 5	3.18225	3.53378	19.6611	2.4125e-08	5.57388e-07	10.0467
57221	ENSG00000112379	ARFGEF3	ARFGEF family member 3	1.73098	8.28359	19.6446	2.42938e-08	5.60634e-07	9.8078
152006	ENSG00000137075	RNF38	ring finger protein 38	2.20202	4.2235	19.6435	2.4305e-08	5.60634e-07	10.0036
401474	ENSG00000177570	SAMD12	sterile alpha motif domain containing 12	2.10652	4.39034	19.634	2.44023e-08	5.62421e-07	9.98511
255394	ENSG00000166046	TCP11L2	t-complex 11 like 2	5.31276	2.93256	19.62	2.45465e-08	5.65163e-07	9.8175
1039	ENSG00000140743	CDR2	cerebellar degeneration related protein 2	2.98535	4.18338	19.6186	2.4561e-08	5.65163e-07	10.0137
283464	ENSG00000151233	GXYLT1	glucoside xylosyltransferase 1	2.50551	4.61672	19.6128	2.46213e-08	5.66092e-07	9.97116
388722	ENSG00000203724	C1orf53	chromosome 1 open reading frame 53	-2.38196	3.35304	-19.6006	2.47482e-08	5.68217e-07	10.0165
5859	ENSG00000172053	QARS1	glutaminyl-tRNA synthetase 1	-1.50338	6.94223	-19.6001	2.47538e-08	5.68217e-07	9.81116
151636	ENSG00000163840	DTX3L	deltex E3 ubiquitin ligase 3L	2.09822	5.19052	19.5965	2.47912e-08	5.68345e-07	9.9101
9554	ENSG00000265808	SEC22B	SEC22 homolog B, vesicle trafficking protein	2.06818	5.80628	19.5941	2.48165e-08	5.68345e-07	9.86914
4122	ENSG00000196547	MAN2A2	mannosidase alpha class 2A member 2	2.32119	6.03426	19.5938	2.48194e-08	5.68345e-07	9.86144
471	ENSG00000138363	ATIC	5-aminoimidazole-4-carboxamide ribonucleotide formyltransferase/IMP cyclohydrolase	-1.51133	7.36147	-19.5874	2.4887e-08	5.69376e-07	9.79487
23145	ENSG00000197558	SSPOP	SCO-spondin, pseudogene	-2.9956	2.73675	-19.5857	2.49046e-08	5.69376e-07	10.0025
6415	ENSG00000178980	SELENOW	selenoprotein W	-1.95132	5.88558	-19.579	2.49746e-08	5.70519e-07	9.84419
9368	ENSG00000109062	NHERF1	NHERF family PDZ scaffold protein 1	-1.56955	6.53157	-19.5764	2.50023e-08	5.70691e-07	9.81369
2957	ENSG00000165417	GTF2A1	general transcription factor IIA subunit 1	1.81191	5.32645	19.573	2.50381e-08	5.7105e-07	9.88377
10090	ENSG00000111962	UST	uronyl 2-sulfotransferase	3.56519	3.38937	19.5629	2.51457e-08	5.73043e-07	9.99681
6672	ENSG00000067066	SP100	SP100 nuclear antigen	3.60761	2.90883	19.5602	2.51748e-08	5.73247e-07	9.94833
10327	ENSG00000117448	AKR1A1	aldo-keto reductase family 1 member A1	-1.6719	7.4634	-19.5481	2.53033e-08	5.75544e-07	9.77545
126133	ENSG00000161618	ALDH16A1	aldehyde dehydrogenase 16 family member A1	-2.5599	4.59875	-19.5469	2.53162e-08	5.75544e-07	9.92068
6549	ENSG00000115616	SLC9A2	solute carrier family 9 member A2	2.11854	4.14893	19.5414	2.53751e-08	5.76422e-07	9.96154
56928	ENSG00000005206	SPPL2B	signal peptide peptidase like 2B	-1.71687	6.61202	-19.5369	2.54242e-08	5.77075e-07	9.79397
9181	ENSG00000116584	ARHGEF2	Rho/Rac guanine nucleotide exchange factor 2	2.46754	7.1338	19.5228	2.55764e-08	5.80066e-07	9.78574
11230	ENSG00000243279	PRAF2	PRA1 domain family member 2	-1.65587	5.51261	-19.5106	2.57083e-08	5.82261e-07	9.8291
140465	ENSG00000196465	MYL6B	myosin light chain 6B	-1.96879	6.33424	-19.5101	2.57142e-08	5.82261e-07	9.79395
2669	ENSG00000164949	GEM	GTP binding protein overexpressed in skeletal muscle	8.24169	2.37577	19.5017	2.58061e-08	5.83159e-07	8.7632
54916	ENSG00000070269	TMEM260	transmembrane protein 260	2.00479	4.7023	19.5014	2.58091e-08	5.83159e-07	9.90092
80223	ENSG00000156675	RAB11FIP1	RAB11 family interacting protein 1	1.61738	5.95883	19.4993	2.58318e-08	5.83159e-07	9.81117
84864	ENSG00000170854	RIOX2	ribosomal oxygenase 2	2.45449	5.38439	19.499	2.5836e-08	5.83159e-07	9.86128
1604	ENSG00000196352	CD55	CD55 molecule (Cromer blood group)	2.33554	4.32232	19.4921	2.59113e-08	5.84393e-07	9.93435
11099	ENSG00000070778	PTPN21	protein tyrosine phosphatase non-receptor type 21	4.35145	3.57506	19.4881	2.59555e-08	5.84871e-07	9.95631
6231	ENSG00000197728	RPS26	ribosomal protein S26	-2.35055	8.95116	-19.4864	2.59737e-08	5.84871e-07	9.72606
51372	ENSG00000232112	TMA7	translation machinery associated 7 homolog	-1.69133	7.08973	-19.4832	2.60089e-08	5.852e-07	9.75495
8324	ENSG00000155760	FZD7	frizzled class receptor 7	3.21741	2.92107	19.4776	2.60714e-08	5.86109e-07	9.93732
25822	ENSG00000137094	DNAJB5	DnaJ heat shock protein family (Hsp40) member B5	2.18912	3.98444	19.4759	2.60906e-08	5.86109e-07	9.94491
55668	ENSG00000089916	GPATCH2L	G-patch domain containing 2 like	2.04905	5.17239	19.4603	2.62639e-08	5.89107e-07	9.84872
4285	ENSG00000027001	MIPEP	mitochondrial intermediate peptidase	-1.99737	4.54346	-19.4601	2.62655e-08	5.89107e-07	9.8738
1073	ENSG00000165410	CFL2	cofilin 2	1.83435	4.76085	19.4565	2.63061e-08	5.89553e-07	9.87191
26127	ENSG00000111790	FGFR1OP2	FGFR1 oncogene partner 2	2.38898	4.18322	19.4535	2.63401e-08	5.89847e-07	9.92778
9205	ENSG00000132950	ZMYM5	zinc finger MYM-type containing 5	2.89789	3.8433	19.4422	2.64662e-08	5.92204e-07	9.9493
51398	ENSG00000105583	WDR83OS	WD repeat domain 83 opposite strand	-2.05538	5.56266	-19.4398	2.64936e-08	5.9235e-07	9.79886
114818	ENSG00000119771	KLHL29	kelch like family member 29	3.2715	3.72997	19.4363	2.65335e-08	5.92777e-07	9.95261
4729	ENSG00000178127	NDUFV2	NADH:ubiquinone oxidoreductase core subunit V2	-1.46605	7.11486	-19.4305	2.65984e-08	5.93337e-07	9.72912
4649	ENSG00000066933	MYO9A	myosin IXA	1.88172	5.15959	19.4304	2.66004e-08	5.93337e-07	9.83207
25898	ENSG00000163743	RCHY1	ring finger and CHY zinc finger domain containing 1	2.04283	4.83231	19.4262	2.66479e-08	5.9393e-07	9.85822
8428	ENSG00000102572	STK24	serine/threonine kinase 24	2.11731	5.56494	19.4139	2.67871e-08	5.95966e-07	9.80296
6227	ENSG00000171858	RPS21	ribosomal protein S21	-2.71936	9.08446	-19.4121	2.68077e-08	5.95966e-07	9.69142
23405	ENSG00000100697	DICER1	dicer 1, ribonuclease III	1.66686	5.55821	19.4102	2.68298e-08	5.95966e-07	9.79303
22847	ENSG00000168813	ZNF507	zinc finger protein 507	2.09461	5.08269	19.4094	2.68387e-08	5.95966e-07	9.83382
10495	ENSG00000165675	ENOX2	ecto-NOX disulfide-thiol exchanger 2	2.76522	4.13176	19.4089	2.68442e-08	5.95966e-07	9.91939
55884	ENSG00000176871	WSB2	WD repeat and SOCS box containing 2	1.76409	6.56582	19.375	2.7235e-08	6.03734e-07	9.73026
376940	ENSG00000188177	ZC3H6	zinc finger CCCH-type containing 6	1.94221	5.06817	19.3749	2.72366e-08	6.03734e-07	9.81526
840	ENSG00000165806	CASP7	caspase 7	1.95624	4.58281	19.3715	2.72767e-08	6.03877e-07	9.85051
23301	ENSG00000115504	EHBP1	EH domain binding protein 1	2.39853	3.90409	19.3707	2.72856e-08	6.03877e-07	9.90775
257397	ENSG00000157625	TAB3	TGF-beta activated kinase 1 (MAP3K7) binding protein 3	2.52525	4.56101	19.3625	2.73814e-08	6.04615e-07	9.8639
64928	ENSG00000180992	MRPL14	mitochondrial ribosomal protein L14	-2.00121	5.26095	-19.3613	2.7395e-08	6.04615e-07	9.77997
367	ENSG00000169083	AR	androgen receptor	-1.61147	6.93476	-19.3613	2.73953e-08	6.04615e-07	9.70299
7760	ENSG00000085644	ZNF213	zinc finger protein 213	1.79319	6.27013	19.3605	2.74047e-08	6.04615e-07	9.73599
7555	ENSG00000169714	CNBP	CCHC-type zinc finger nucleic acid binding protein	1.47017	8.37434	19.3575	2.74395e-08	6.04615e-07	9.67426
9232	ENSG00000164611	PTTG1	PTTG1 regulator of sister chromatid separation, securin	-2.88727	3.47483	-19.3562	2.74547e-08	6.04615e-07	9.91313
5693	ENSG00000100804	PSMB5	proteasome 20S subunit beta 5	-1.88572	6.89691	-19.355	2.74696e-08	6.04615e-07	9.70289
51125	ENSG00000147533	GOLGA7	golgin A7	2.02224	5.75135	19.3533	2.74893e-08	6.04615e-07	9.76271
79912	ENSG00000121350	PYROXD1	pyridine nucleotide-disulphide oxidoreductase domain 1	2.1012	4.1526	19.3469	2.75648e-08	6.058e-07	9.87532
197370	ENSG00000169189	NSMCE1	NSE1 homolog, SMC5-SMC6 complex component	-1.612	6.55962	-19.3451	2.75858e-08	6.058e-07	9.70752
4919	ENSG00000185483	ROR1	receptor tyrosine kinase like orphan receptor 1	3.31077	3.74203	19.3315	2.77464e-08	6.0804e-07	9.90809
8829	ENSG00000099250	NRP1	neuropilin 1	-1.90793	4.53269	-19.3298	2.77668e-08	6.0804e-07	9.81421
280636	ENSG00000211450	SELENOH	selenoprotein H	-2.27282	6.45667	-19.3296	2.77696e-08	6.0804e-07	9.70978
3398	ENSG00000115738	ID2	inhibitor of DNA binding 2	3.68552	3.03558	19.3292	2.77735e-08	6.0804e-07	9.86994
83891	ENSG00000109762	SNX25	sorting nexin 25	2.07001	4.51781	19.3194	2.78903e-08	6.10128e-07	9.83552
670	ENSG00000137274	BPHL	biphenyl hydrolase like	-1.73699	5.1156	-19.313	2.79672e-08	6.11339e-07	9.76353
10591	ENSG00000112667	DNPH1	2'-deoxynucleoside 5'-phosphate N-hydrolase 1	-2.59628	5.29429	-19.3085	2.80205e-08	6.12033e-07	9.76421
162972	ENSG00000251369	ZNF550	zinc finger protein 550	2.66593	3.87701	19.3051	2.80617e-08	6.12461e-07	9.88493
10975	ENSG00000127540	UQCR11	ubiquinol-cytochrome c reductase, complex III subunit XI	-2.26849	7.45608	-19.3014	2.81069e-08	6.12977e-07	9.66563
83933	ENSG00000100429	HDAC10	histone deacetylase 10	-2.57213	6.1993	-19.298	2.8147e-08	6.13158e-07	9.70953
3014	ENSG00000188486	H2AX	H2A.X variant histone	-3.28185	5.2219	-19.2965	2.81652e-08	6.13158e-07	9.78145
8655	ENSG00000088986	DYNLL1	dynein light chain LC8-type 1	-2.33769	6.88642	-19.2953	2.818e-08	6.13158e-07	9.67933
155368	ENSG00000165171	METTL27	methyltransferase like 27	-2.01988	3.95875	-19.2888	2.82583e-08	6.1439e-07	9.84066
2729	ENSG00000001084	GCLC	glutamate-cysteine ligase catalytic subunit	1.91131	4.81518	19.2857	2.8296e-08	6.1474e-07	9.79282
11228	ENSG00000123094	RASSF8	Ras association domain family member 8	4.90251	2.28195	19.2786	2.83819e-08	6.16134e-07	9.53676
23122	ENSG00000163539	CLASP2	cytoplasmic linker associated protein 2	1.83159	5.30035	19.2735	2.84443e-08	6.17017e-07	9.75032
7772	ENSG00000278318	ZNF229	zinc finger protein 229	2.87129	3.4223	19.2644	2.85561e-08	6.18969e-07	9.87994
101928736	ENSG00000260083	MIR762HG	MIR762 host gene	-2.67956	3.01784	-19.2623	2.85814e-08	6.19046e-07	9.87907
3437	ENSG00000119917	IFIT3	interferon induced protein with tetratricopeptide repeats 3	6.35392	2.43982	19.246	2.87821e-08	6.2232e-07	9.28894
25987	ENSG00000182704	TSKU	tsukushi, small leucine rich proteoglycan	1.58166	5.76553	19.2455	2.87884e-08	6.2232e-07	9.7048
55004	ENSG00000149357	LAMTOR1	late endosomal/lysosomal adaptor, MAPK and MTOR activator 1	-1.65971	6.4871	-19.2439	2.88086e-08	6.2232e-07	9.6638
22976	ENSG00000157212	PAXIP1	PAX interacting protein 1	2.93461	3.68717	19.2429	2.88202e-08	6.2232e-07	9.86814
91543	ENSG00000134321	RSAD2	radical S-adenosyl methionine domain containing 2	7.09626	1.67882	19.2386	2.88745e-08	6.23001e-07	8.56052
56204	ENSG00000047346	ATOSA	atos homolog A	2.05461	5.63957	19.2369	2.88957e-08	6.23001e-07	9.71652
5784	ENSG00000152104	PTPN14	protein tyrosine phosphatase non-receptor type 14	1.93282	4.62592	19.2068	2.92712e-08	6.30619e-07	9.77255
1468	ENSG00000183048	SLC25A10	solute carrier family 25 member 10	-1.88713	7.00984	-19.204	2.93073e-08	6.30917e-07	9.62995
65981	ENSG00000110888	CAPRIN2	caprin family member 2	1.82546	5.44557	19.2011	2.93431e-08	6.31209e-07	9.70755
51752	ENSG00000164307	ERAP1	endoplasmic reticulum aminopeptidase 1	2.68755	4.16093	19.1988	2.93731e-08	6.31377e-07	9.82326
84542	ENSG00000162929	SANBR	SANT and BTB domain regulator of CSR	2.64675	3.47934	19.1901	2.94829e-08	6.32882e-07	9.84715
3712	ENSG00000128928	IVD	isovaleryl-CoA dehydrogenase	-1.52775	7.06505	-19.1896	2.94889e-08	6.32882e-07	9.61976
55197	ENSG00000141425	RPRD1A	regulation of nuclear pre-mRNA domain containing 1A	1.59124	5.96376	19.1864	2.95297e-08	6.32882e-07	9.66759
5931	ENSG00000102054	RBBP7	RB binding protein 7, chromatin remodeling factor	-1.83351	6.05524	-19.1862	2.95323e-08	6.32882e-07	9.656
93210	ENSG00000161395	PGAP3	post-GPI attachment to proteins phospholipase 3	-2.15783	4.06054	-19.1798	2.96136e-08	6.34147e-07	9.78768
956	ENSG00000168032	ENTPD3	ectonucleoside triphosphate diphosphohydrolase 3	3.22355	2.99916	19.1718	2.97158e-08	6.35354e-07	9.81958
158586	ENSG00000198455	ZXDB	zinc finger X-linked duplicated B	2.82566	4.28226	19.1691	2.97508e-08	6.35354e-07	9.8069
9263	ENSG00000164543	STK17A	serine/threonine kinase 17a	1.9308	4.55374	19.1686	2.97568e-08	6.35354e-07	9.7608
25976	ENSG00000163659	TIPARP	TCDD inducible poly(ADP-ribose) polymerase	2.81059	3.08378	19.1663	2.97867e-08	6.35354e-07	9.83204
3728	ENSG00000173801	JUP	junction plakoglobin	-1.77475	8.05493	-19.1662	2.97881e-08	6.35354e-07	9.58904
535	ENSG00000033627	ATP6V0A1	ATPase H+ transporting V0 subunit a1	-1.74886	5.67244	-19.165	2.98042e-08	6.35354e-07	9.66384
54834	ENSG00000196505	GDAP2	ganglioside induced differentiation associated protein 2	1.9544	4.52175	19.1533	2.99547e-08	6.38082e-07	9.75702
93611	ENSG00000132879	FBXO44	F-box protein 44	-1.6666	5.57517	-19.1491	3.00093e-08	6.38767e-07	9.6608
10525	ENSG00000149428	HYOU1	hypoxia up-regulated 1	1.40581	8.80675	19.1335	3.02117e-08	6.42593e-07	9.56446
79982	ENSG00000164031	DNAJB14	DnaJ heat shock protein family (Hsp40) member B14	2.04155	4.47448	19.1308	3.02472e-08	6.42867e-07	9.75288
23012	ENSG00000211455	STK38L	serine/threonine kinase 38 like	1.8032	4.81057	19.112	3.04932e-08	6.4761e-07	9.71175
2263	ENSG00000066468	FGFR2	fibroblast growth factor receptor 2	5.1666	1.97823	19.1051	3.05855e-08	6.4866e-07	9.28954
79603	ENSG00000090661	CERS4	ceramide synthase 4	-1.94951	6.16134	-19.1048	3.05883e-08	6.4866e-07	9.61492
219333	ENSG00000152484	USP12	ubiquitin specific peptidase 12	2.83865	3.36052	19.0991	3.06647e-08	6.49795e-07	9.809
55870	ENSG00000116539	ASH1L	ASH1 like histone lysine methyltransferase	2.63938	6.27113	19.0934	3.07401e-08	6.50906e-07	9.62671
5569	ENSG00000171033	PKIA	cAMP-dependent protein kinase inhibitor alpha	4.52086	2.17938	19.0891	3.07971e-08	6.51624e-07	9.49398
55621	ENSG00000104907	TRMT1	tRNA methyltransferase 1	-1.89015	6.4491	-19.0874	3.08199e-08	6.51624e-07	9.59461
25989	ENSG00000140474	ULK3	unc-51 like kinase 3	-1.49694	6.21894	-19.0837	3.08699e-08	6.51956e-07	9.59886
23279	ENSG00000030066	NUP160	nucleoporin 160	1.8644	4.67197	19.0828	3.08815e-08	6.51956e-07	9.71103
246175	ENSG00000138767	CNOT6L	CCR4-NOT transcription complex subunit 6 like	2.03663	4.21638	19.0798	3.09222e-08	6.5233e-07	9.74964
5594	ENSG00000100030	MAPK1/ERK	mitogen-activated protein kinase 1	2.13605	6.72408	19.0727	3.10168e-08	6.53565e-07	9.58927
54431	ENSG00000077232	DNAJC10	DnaJ heat shock protein family (Hsp40) member C10	1.52706	6.66783	19.072	3.10268e-08	6.53565e-07	9.58404
5652	ENSG00000052344	PRSS8	serine protease 8	-2.0404	6.61801	-19.0688	3.10694e-08	6.53831e-07	9.58104
26263	ENSG00000167196	FBXO22	F-box protein 22	2.15805	4.84081	19.0676	3.10855e-08	6.53831e-07	9.69835
51308	ENSG00000132563	REEP2	receptor accessory protein 2	-2.03229	3.90155	-19.0589	3.12027e-08	6.55811e-07	9.74202
8878	ENSG00000161011	SQSTM1	sequestosome 1	1.41741	9.4644	19.0535	3.12756e-08	6.56858e-07	9.52046
57579	ENSG00000082269	FAM135A	family with sequence similarity 135 member A	3.80874	3.03822	19.0427	3.14227e-08	6.59458e-07	9.74781
116068	ENSG00000176018	LYSMD3	LysM domain containing 3	3.72019	4.50236	19.0391	3.1473e-08	6.60027e-07	9.75761
27309	ENSG00000109445	ZNF330	zinc finger protein 330	1.96415	4.48553	19.0364	3.15089e-08	6.60292e-07	9.70753
11007	ENSG00000175602	CCDC85B	coiled-coil domain containing 85B	-3.09952	6.42488	-19.0293	3.16068e-08	6.61119e-07	9.58307
118472	ENSG00000198546	ZNF511	zinc finger protein 511	-2.50793	5.14955	-19.0292	3.16075e-08	6.61119e-07	9.64434
64376	ENSG00000095574	IKZF5	IKAROS family zinc finger 5	2.27145	3.93543	19.0284	3.16182e-08	6.61119e-07	9.75165
2280	ENSG00000088832	FKBP1A	FKBP prolyl isomerase 1A	-1.79389	6.22074	-19.0162	3.17873e-08	6.64166e-07	9.56963
10608	ENSG00000123933	MXD4	MAX dimerization protein 4	-2.04187	6.89019	-19.013	3.18313e-08	6.6421e-07	9.54579
140809	ENSG00000271303	SRXN1	sulfiredoxin 1	1.63122	7.056	19.0117	3.18489e-08	6.6421e-07	9.54377
11342	ENSG00000082996	RNF13	ring finger protein 13	1.78939	4.91388	19.0109	3.18596e-08	6.6421e-07	9.657
2319	ENSG00000132589	FLOT2	flotillin 2	-2.07967	7.29725	-19.0042	3.19529e-08	6.65667e-07	9.5304
23710	ENSG00000139112	GABARAPL1	GABA type A receptor associated protein like 1	2.20688	6.63808	18.9931	3.21077e-08	6.684e-07	9.55651
171586	ENSG00000158201	ABHD3	abhydrolase domain containing 3, phospholipase	2.14817	4.50555	18.9877	3.21835e-08	6.6914e-07	9.68917
51117	ENSG00000167113	COQ4	coenzyme Q4	-2.43907	5.72143	-18.9858	3.22095e-08	6.6914e-07	9.58732
23244	ENSG00000121892	PDS5A	PDS5 cohesin associated factor A	1.51676	6.60902	18.9855	3.22139e-08	6.6914e-07	9.54576
9698	ENSG00000134644	PUM1	pumilio RNA binding family member 1	1.52289	6.88396	18.9753	3.23581e-08	6.71644e-07	9.53131
472	ENSG00000149311	ATM	ATM serine/threonine kinase	2.5993	5.45402	18.9694	3.24403e-08	6.72612e-07	9.61881
79740	ENSG00000169064	ZBBX	zinc finger B-box domain containing	-2.56302	3.09269	-18.9686	3.24521e-08	6.72612e-07	9.75126
84142	ENSG00000163322	ABRAXAS1	abraxas 1, BRCA1 A complex subunit	2.69002	3.29236	18.9617	3.25494e-08	6.74135e-07	9.74969
80829	ENSG00000186660	ZFP91	ZFP91 zinc finger protein, atypical E3 ubiquitin ligase	2.08965	5.93767	18.9591	3.25863e-08	6.7436e-07	9.57159
6643	ENSG00000205302	SNX2	sorting nexin 2	1.55214	6.29292	18.9576	3.26077e-08	6.7436e-07	9.5458
23770	ENSG00000105701	FKBP8	FKBP prolyl isomerase 8	-2.08905	8.95296	-18.9557	3.26348e-08	6.7443e-07	9.47917
6019	ENSG00000107014	RLN2	relaxin 2	-3.77171	2.02059	-18.9506	3.27078e-08	6.75447e-07	9.60716
2632	ENSG00000114480	GBE1	1,4-alpha-glucan branching enzyme 1	2.84016	4.78962	18.9464	3.27672e-08	6.75717e-07	9.66787
23011	ENSG00000080371	RAB21	RAB21, member RAS oncogene family	1.73546	5.43708	18.9463	3.27685e-08	6.75717e-07	9.58879
10535	ENSG00000104889	RNASEH2A	ribonuclease H2 subunit A	-1.69494	4.97823	-18.9429	3.28177e-08	6.7624e-07	9.60205
57403	ENSG00000124209	RAB22A	RAB22A, member RAS oncogene family	1.64697	5.25837	18.9393	3.28695e-08	6.76816e-07	9.59567
22931	ENSG00000099246	RAB18	RAB18, member RAS oncogene family	1.54893	6.4905	18.9272	3.30432e-08	6.79713e-07	9.52344
6632	ENSG00000167088	SNRPD1	small nuclear ribonucleoprotein D1 polypeptide	-1.69338	5.75542	-18.9262	3.3058e-08	6.79713e-07	9.54821
4685	ENSG00000154654	NCAM2	neural cell adhesion molecule 2	-1.53026	7.78138	-18.9188	3.31648e-08	6.80594e-07	9.47724
11277	ENSG00000213689	TREX1	three prime repair exonuclease 1	-2.33674	5.68703	-18.9172	3.31886e-08	6.80594e-07	9.55555
23175	ENSG00000134324	LPIN1	lipin 1	1.68396	5.75712	18.9135	3.32415e-08	6.80594e-07	9.55328
64975	ENSG00000182154	MRPL41	mitochondrial ribosomal protein L41	-2.34609	7.38952	-18.9131	3.32474e-08	6.80594e-07	9.48705
100093630	ENSG00000269893	SNHG8	small nucleolar RNA host gene 8	-1.79811	6.8023	-18.9129	3.32508e-08	6.80594e-07	9.49987
55771	ENSG00000068489	PRR11	proline rich 11	-2.34344	3.2544	-18.9124	3.32574e-08	6.80594e-07	9.72017
9411	ENSG00000137962	ARHGAP29	Rho GTPase activating protein 29	2.84873	5.53465	18.9116	3.32687e-08	6.80594e-07	9.5932
57128	ENSG00000214113	LYRM4	LYR motif containing 4	-1.97369	4.52858	-18.9043	3.33759e-08	6.8191e-07	9.62197
1386	ENSG00000115966	ATF2	activating transcription factor 2	1.99549	4.7999	18.9025	3.34016e-08	6.8191e-07	9.62169
6603	ENSG00000108604	SMARCD2	SWI/SNF related, matrix associated, actin dependent regulator of chromatin, subfamily d, member 2	-1.93141	6.17611	-18.9023	3.34051e-08	6.8191e-07	9.5196
160760	ENSG00000196850	PPTC7	protein phosphatase targeting COQ7	2.10803	4.57913	18.8811	3.37155e-08	6.87455e-07	9.63258
84333	ENSG00000180628	PCGF5	polycomb group ring finger 5	2.57087	4.76667	18.8805	3.37251e-08	6.87455e-07	9.63239
4591	ENSG00000108395	TRIM37	tripartite motif containing 37	2.07163	4.76394	18.8785	3.37541e-08	6.87552e-07	9.61537
114991	ENSG00000157657	ZNF618	zinc finger protein 618	-3.53487	2.95517	-18.8703	3.38759e-08	6.89539e-07	9.70413
10957	ENSG00000146278	PNRC1	proline rich nuclear receptor coactivator 1	1.70351	5.22573	18.864	3.39696e-08	6.90732e-07	9.56404
4924	ENSG00000104805	NUCB1	nucleobindin 1	-1.59379	6.57087	-18.863	3.39847e-08	6.90732e-07	9.48293
22926	ENSG00000118217	ATF6	activating transcription factor 6	1.65241	6.45982	18.8614	3.40075e-08	6.90732e-07	9.4949
5578	ENSG00000154229	PRKCA	protein kinase C alpha	2.73109	4.11066	18.8594	3.40384e-08	6.90866e-07	9.67555
51185	ENSG00000113851	CRBN	cereblon	1.70111	5.6433	18.8534	3.4128e-08	6.92189e-07	9.53202
57198	ENSG00000143515	ATP8B2	ATPase phospholipid transporting 8B2	2.20385	4.73854	18.8512	3.41597e-08	6.92338e-07	9.60852
347862	ENSG00000177225	GATD1	glutamine amidotransferase class 1 domain containing 1	-1.58195	6.04799	-18.8494	3.41876e-08	6.92408e-07	9.49724
100652748	ENSG00000204152	TIMM23B	translocase of inner mitochondrial membrane 23 homolog B	2.22806	3.85487	18.8469	3.42247e-08	6.92528e-07	9.67439
23657	ENSG00000151012	SLC7A11	solute carrier family 7 member 11	1.61174	7.00765	18.8457	3.42423e-08	6.92528e-07	9.46721
51582	ENSG00000155096	AZIN1	antizyme inhibitor 1	1.96362	6.89594	18.8386	3.43487e-08	6.938e-07	9.47127
54764	ENSG00000019995	ZRANB1	zinc finger RANBP2-type containing 1	2.49215	5.82763	18.8373	3.43686e-08	6.938e-07	9.52954
9712	ENSG00000148429	USP6NL	USP6 N-terminal like	2.7479	3.9957	18.8367	3.43785e-08	6.938e-07	9.67285
9852	ENSG00000178567	EPM2AIP1	EPM2A interacting protein 1	2.25133	3.79264	18.8209	3.46172e-08	6.98122e-07	9.66688
55667	ENSG00000137145	DENND4C	DENN domain containing 4C	1.65214	5.53658	18.8156	3.46974e-08	6.99243e-07	9.52004
10455	ENSG00000198721	ECI2	enoyl-CoA delta isomerase 2	-1.78902	5.36546	-18.8103	3.4778e-08	7.00369e-07	9.51667
3267	ENSG00000173744	AGFG1	ArfGAP with FG repeats 1	2.2234	5.28147	18.8046	3.48664e-08	7.01652e-07	9.54469
2121	ENSG00000072840	EVC	EvC ciliary complex subunit 1	2.60764	4.03258	18.7989	3.49538e-08	7.0285e-07	9.65015
3140	ENSG00000153029	MR1	major histocompatibility complex, class I-related	1.9375	4.28892	18.7974	3.49763e-08	7.0285e-07	9.61306
29843	ENSG00000079387	SENP1	SUMO specific peptidase 1	2.28448	4.06691	18.7947	3.50174e-08	7.0285e-07	9.63847
3385	ENSG00000076662	ICAM3	intercellular adhesion molecule 3	-2.33406	4.01571	-18.7909	3.50759e-08	7.0285e-07	9.61876
6671	ENSG00000105866	SP4	Sp4 transcription factor	2.62037	3.96158	18.7903	3.50852e-08	7.0285e-07	9.65188
22885	ENSG00000173210	ABLIM3	actin binding LIM protein family member 3	4.34368	2.42083	18.7895	3.50978e-08	7.0285e-07	9.48049
283554	ENSG00000180998	GPR137C	G protein-coupled receptor 137C	3.96759	2.72039	18.7884	3.51152e-08	7.0285e-07	9.58392
10124	ENSG00000122644	ARL4A	ADP ribosylation factor like GTPase 4A	2.76313	3.18556	18.7878	3.51239e-08	7.0285e-07	9.67315
54704	ENSG00000164951	PDP1	pyruvate dehydrogenase phosphatase catalytic subunit 1	2.36577	3.72511	18.7861	3.51511e-08	7.02898e-07	9.65736
7750	ENSG00000121741	ZMYM2	zinc finger MYM-type containing 2	2.07199	5.74752	18.7805	3.52364e-08	7.04108e-07	9.49866
54938	ENSG00000104835	SARS2	seryl-tRNA synthetase 2, mitochondrial	-2.43522	4.48861	-18.7722	3.53666e-08	7.06213e-07	9.57524
8844	ENSG00000141068	KSR1	kinase suppressor of ras 1	5.34534	2.18605	18.7696	3.54064e-08	7.06437e-07	9.22393
2264	ENSG00000160867	FGFR4	fibroblast growth factor receptor 4	-2.15949	3.54735	-18.7682	3.54276e-08	7.06437e-07	9.63759
9526	ENSG00000129255	MPDU1	mannose-P-dolichol utilization defect 1	-1.68305	6.06109	-18.7661	3.54612e-08	7.06612e-07	9.45824
26994	ENSG00000123091	RNF11	ring finger protein 11	1.8297	6.97157	18.7618	3.55276e-08	7.07438e-07	9.43098
128869	ENSG00000101464	PIGU	phosphatidylinositol glycan anchor biosynthesis class U	-3.11829	2.74277	-18.7586	3.5578e-08	7.07945e-07	9.65431
6133	ENSG00000163682	RPL9	ribosomal protein L9	-2.61929	9.57183	-18.7553	3.563e-08	7.08482e-07	9.37934
54617	ENSG00000128908	INO80	INO80 complex ATPase subunit	1.63534	5.67398	18.7528	3.56692e-08	7.08766e-07	9.48189
79957	ENSG00000160781	PAQR6	progestin and adipoQ receptor family member 6	-2.31615	3.35492	-18.7482	3.5741e-08	7.09696e-07	9.64204
254531	ENSG00000176454	LPCAT4	lysophosphatidylcholine acyltransferase 4	-2.12839	4.01948	-18.745	3.57922e-08	7.10217e-07	9.5926
51181	ENSG00000169738	DCXR	dicarbonyl and L-xylulose reductase	-1.94394	7.79587	-18.7343	3.59618e-08	7.13083e-07	9.39112
79872	ENSG00000105879	CBLL1	Cbl proto-oncogene like 1	1.919	4.4253	18.7326	3.59882e-08	7.13108e-07	9.57162
93974	ENSG00000130770	ATP5IF1	ATP synthase inhibitory factor subunit 1	-1.48803	6.92314	-18.7291	3.60445e-08	7.13727e-07	9.40752
5504	ENSG00000184203	PPP1R2	protein phosphatase 1 regulatory inhibitor subunit 2	1.72319	5.65405	18.7273	3.60719e-08	7.1377e-07	9.47265
10771	ENSG00000015171	ZMYND11	zinc finger MYND-type containing 11	2.04578	6.35841	18.7243	3.61195e-08	7.1377e-07	9.43973
92822	ENSG00000158805	ZNF276	zinc finger protein 276	-1.84953	4.84968	-18.7197	3.61941e-08	7.1377e-07	9.5096
63976	ENSG00000142611	PRDM16	PR/SET domain 16	8.00032	1.92263	18.7192	3.6202e-08	7.1377e-07	8.2826
122830	ENSG00000139977	NAA30	N-alpha-acetyltransferase 30, NatC catalytic subunit	1.79391	4.73813	18.7181	3.62196e-08	7.1377e-07	9.53548
728658	ENSG00000236552	RPL13AP5	ribosomal protein L13a pseudogene 5	-2.72999	6.51411	-18.7177	3.6226e-08	7.1377e-07	9.42734
84058	ENSG00000005448	WDR54	WD repeat domain 54	-2.84276	3.77212	-18.7169	3.62389e-08	7.1377e-07	9.61476
51079	ENSG00000186010	NDUFA13	NADH:ubiquinone oxidoreductase subunit A13	-2.52973	7.55694	-18.7141	3.62828e-08	7.1377e-07	9.38995
7008	ENSG00000167074	TEF	TEF transcription factor, PAR bZIP family member	1.72827	5.12659	18.7133	3.62961e-08	7.1377e-07	9.50125
5610	ENSG00000055332	EIF2AK2	eukaryotic translation initiation factor 2 alpha kinase 2	2.13591	3.99378	18.7128	3.6304e-08	7.1377e-07	9.60182
9912	ENSG00000006740	ARHGAP44	Rho GTPase activating protein 44	3.02863	4.99332	18.7116	3.63232e-08	7.1377e-07	9.54917
5050	ENSG00000079462	PAFAH1B3	platelet activating factor acetylhydrolase 1b catalytic subunit 3	-3.11552	4.64253	-18.7043	3.64396e-08	7.15562e-07	9.55058
54584	ENSG00000185838	GNB1L	G protein subunit beta 1 like	-3.14329	3.10655	-18.7019	3.64795e-08	7.1585e-07	9.63622
8445	ENSG00000127334	DYRK2	dual specificity tyrosine phosphorylation regulated kinase 2	3.05648	2.98599	18.6993	3.65204e-08	7.16157e-07	9.62393
11059	ENSG00000123124	WWP1	WW domain containing E3 ubiquitin protein ligase 1	3.1375	5.70594	18.6941	3.66055e-08	7.17204e-07	9.48773
10174	ENSG00000120896	SORBS3	sorbin and SH3 domain containing 3	-1.70779	5.46665	-18.6929	3.66243e-08	7.17204e-07	9.45444
140711	ENSG00000101342	TLDC2	TBC/LysM-associated domain containing 2	-2.88131	2.74747	-18.6902	3.66673e-08	7.17551e-07	9.62778
3899	ENSG00000144218	AFF3	ALF transcription elongation factor 3	2.96838	3.54615	18.6821	3.67989e-08	7.19631e-07	9.6256
140701	ENSG00000183260	ABHD16B	abhydrolase domain containing 16B	-2.25245	3.62549	-18.6795	3.68412e-08	7.19964e-07	9.59415
10998	ENSG00000083807	SLC27A5	solute carrier family 27 member 5	-2.86953	4.53751	-18.6695	3.70048e-08	7.22335e-07	9.53415
84937	ENSG00000186187	ZNRF1	zinc and ring finger 1	-1.6771	4.82332	-18.669	3.70135e-08	7.22335e-07	9.4848
22800	ENSG00000133818	RRAS2	RAS related 2	1.65768	5.27559	18.6602	3.71584e-08	7.24665e-07	9.46422
148327	ENSG00000143578	CREB3L4	cAMP responsive element binding protein 3 like 4	-1.97183	5.21204	-18.6562	3.72233e-08	7.25432e-07	9.45651
5255	ENSG00000067177	PHKA1	phosphorylase kinase regulatory subunit alpha 1	1.6788	5.20261	18.6529	3.72788e-08	7.26015e-07	9.46626
157922	ENSG00000130559	CAMSAP1	calmodulin regulated spectrin associated protein 1	2.50735	6.20373	18.641	3.74746e-08	7.29329e-07	9.41563
347746	NA	PWARSN	Prader Willi/Angelman region RNA, SNRPN neighbor	-2.95198	2.52632	-18.6389	3.75094e-08	7.29466e-07	9.59413
79600	ENSG00000204852	TCTN1	tectonic family member 1	-1.66544	5.20242	-18.6375	3.7533e-08	7.29466e-07	9.44374
29109	ENSG00000135723	FHOD1	formin homology 2 domain containing 1	-2.29741	4.65496	-18.632	3.76241e-08	7.30737e-07	9.49288
147991	ENSG00000178904	DPY19L3	dpy-19 like C-mannosyltransferase 3	1.73045	5.17795	18.628	3.7691e-08	7.31535e-07	9.4574
9765	ENSG00000039319	ZFYVE16	zinc finger FYVE-type containing 16	1.69457	5.56928	18.6211	3.78066e-08	7.33278e-07	9.42714
200030	ENSG00000263956	NBPF11	NBPF member 11	2.35922	5.14431	18.6157	3.78979e-08	7.34547e-07	9.47042
1968	ENSG00000130741	EIF2S3	eukaryotic translation initiation factor 2 subunit gamma	-1.72365	6.92777	-18.6128	3.79465e-08	7.34987e-07	9.3533
92255	ENSG00000164187	LMBRD2	LMBR1 domain containing 2	1.88477	4.37178	18.61	3.79926e-08	7.35379e-07	9.51814
402	ENSG00000213465	ARL2	ADP ribosylation factor like GTPase 2	-2.21702	5.81472	-18.6081	3.80261e-08	7.35525e-07	9.4014
25796	ENSG00000130313	PGLS	6-phosphogluconolactonase	-2.09086	6.14916	-18.604	3.80948e-08	7.36353e-07	9.38152
6146	ENSG00000116251	RPL22	ribosomal protein L22	-2.02829	8.36821	-18.6003	3.81574e-08	7.3706e-07	9.31767
10640	ENSG00000070367	EXOC5	exocyst complex component 5	1.58274	5.43283	18.5955	3.82394e-08	7.38143e-07	9.42156
2760	ENSG00000196743	GM2A	ganglioside GM2 activator	-2.00323	4.91962	-18.5927	3.82868e-08	7.38555e-07	9.44717
4646	ENSG00000196586	MYO6	myosin VI	-1.47105	8.53849	-18.5842	3.84312e-08	7.40837e-07	9.30641
55196	ENSG00000174718	RESF1	retroelement silencing factor 1	2.05717	4.15847	18.5809	3.84874e-08	7.41418e-07	9.5269
340485	ENSG00000177076	ACER2	alkaline ceramidase 2	4.88452	2.22466	18.577	3.8554e-08	7.42166e-07	9.26407
10810	ENSG00000132970	WASF3	WASP family member 3	2.37586	4.20574	18.5752	3.85858e-08	7.42166e-07	9.52928
30001	ENSG00000197930	ERO1A	endoplasmic reticulum oxidoreductase 1 alpha	2.39978	4.65735	18.5741	3.86046e-08	7.42166e-07	9.49249
999	ENSG00000039068	CDH1	cadherin 1	1.52486	8.25063	18.5676	3.87162e-08	7.43807e-07	9.30494
6337	ENSG00000111319	SCNN1A	sodium channel epithelial 1 subunit alpha	-1.52459	6.19173	-18.5641	3.87761e-08	7.44453e-07	9.35542
9446	ENSG00000148834	GSTO1	glutathione S-transferase omega 1	-1.92855	5.16653	-18.5523	3.89805e-08	7.47872e-07	9.40966
7421	ENSG00000111424	VDR	vitamin D receptor	2.06967	4.49923	18.5501	3.90178e-08	7.48083e-07	9.48489
63908	ENSG00000125814	NAPB	NSF attachment protein beta	1.8799	4.33494	18.5464	3.90825e-08	7.48817e-07	9.49136
170691	ENSG00000140470	ADAMTS17	ADAM metallopeptidase with thrombospondin type 1 motif 17	2.60794	3.20111	18.5446	3.91136e-08	7.48909e-07	9.56693
8496	ENSG00000110841	PPFIBP1	PPFIA binding protein 1	1.76453	4.91611	18.5407	3.91827e-08	7.49002e-07	9.43698
27250	ENSG00000150593	PDCD4	programmed cell death 4	1.48079	6.17112	18.5403	3.91883e-08	7.49002e-07	9.35309
4725	ENSG00000168653	NDUFS5	NADH:ubiquinone oxidoreductase subunit S5	-2.36992	7.46458	-18.5398	3.91976e-08	7.49002e-07	9.3078
167227	ENSG00000172795	DCP2	decapping mRNA 2	1.57619	5.54591	18.5369	3.92484e-08	7.49468e-07	9.38637
9372	ENSG00000157077	ZFYVE9	zinc finger FYVE-type containing 9	2.05666	5.47243	18.5244	3.94667e-08	7.53129e-07	9.395
55	ENSG00000014257	ACP3	acid phosphatase 3	-3.40947	2.8167	-18.5228	3.94958e-08	7.53179e-07	9.55011
375743	ENSG00000188647	PTAR1	protein prenyltransferase alpha subunit repeat containing 1	2.1401	4.8403	18.5179	3.95813e-08	7.54304e-07	9.4438
23235	ENSG00000170145	SIK2	salt inducible kinase 2	2.28693	4.72074	18.5129	3.96697e-08	7.5548e-07	9.4549
5218	ENSG00000058091	CDK14	cyclin dependent kinase 14	1.69227	5.57128	18.5112	3.97002e-08	7.55555e-07	9.37461
23092	ENSG00000145819	ARHGAP26	Rho GTPase activating protein 26	1.96724	5.03195	18.5092	3.97351e-08	7.55712e-07	9.41808
1027	ENSG00000111276	CDKN1B	cyclin dependent kinase inhibitor 1B	1.88572	6.10844	18.5002	3.98951e-08	7.5808e-07	9.34257
83451	ENSG00000106077	ABHD11	abhydrolase domain containing 11	-1.69355	5.53869	-18.4992	3.9913e-08	7.5808e-07	9.35824
8660	ENSG00000185950	IRS2	insulin receptor substrate 2	3.75611	3.72445	18.485	4.01679e-08	7.62083e-07	9.54016
56916	ENSG00000163104	SMARCAD1	SWI/SNF-related, matrix-associated actin-dependent regulator of chromatin, subfamily a, containing DEAD/H box 1	1.81619	4.59418	18.4833	4.0198e-08	7.62083e-07	9.43791
374887	ENSG00000250067	YJEFN3	YjeF N-terminal domain containing 3	-1.92902	5.1041	-18.481	4.02387e-08	7.62083e-07	9.37997
5499	ENSG00000172531	PPP1CA	protein phosphatase 1 catalytic subunit alpha	-1.8535	6.73446	-18.4802	4.02536e-08	7.62083e-07	9.29687
10483	ENSG00000101310	SEC23B	SEC23 homolog B, COPII coat complex component	1.7079	7.45607	18.479	4.02749e-08	7.62083e-07	9.2801
3030	ENSG00000084754	HADHA	hydroxyacyl-CoA dehydrogenase trifunctional multienzyme complex subunit alpha	-1.50301	7.44788	-18.4785	4.02848e-08	7.62083e-07	9.27407
93082	ENSG00000163121	NEURL3	neuralized E3 ubiquitin protein ligase 3	4.78563	2.11347	18.4766	4.03189e-08	7.62221e-07	9.20457
3658	ENSG00000136381	IREB2	iron responsive element binding protein 2	1.58758	5.40126	18.4715	4.04097e-08	7.63428e-07	9.36484
26009	ENSG00000036549	ZZZ3	zinc finger ZZ-type containing 3	2.29688	5.88212	18.4673	4.04856e-08	7.64355e-07	9.34677
9470	ENSG00000135930	EIF4E2	eukaryotic translation initiation factor 4E family member 2	-1.5473	5.56727	-18.4545	4.07181e-08	7.6817e-07	9.33372
6895	ENSG00000139546	TARBP2	TARBP2 subunit of RISC loading complex	-1.99444	5.33029	-18.4518	4.07677e-08	7.6817e-07	9.35193
55312	ENSG00000135002	RFK	riboflavin kinase	2.22177	4.94242	18.4517	4.07689e-08	7.6817e-07	9.40649
283349	ENSG00000153179	RASSF3	Ras association domain family member 3	1.60903	7.25825	18.4474	4.08475e-08	7.69141e-07	9.26951
7844	ENSG00000239305	RNF103	ring finger protein 103	1.62807	5.45645	18.4433	4.09225e-08	7.70042e-07	9.34851
4928	ENSG00000110713	NUP98	nucleoporin 98 and 96 precursor	1.67906	7.14715	18.4318	4.11339e-08	7.73509e-07	9.26594
23332	ENSG00000074054	CLASP1	cytoplasmic linker associated protein 1	1.71829	5.36376	18.4284	4.11971e-08	7.74185e-07	9.34929
6789	ENSG00000101109	STK4	serine/threonine kinase 4	1.8242	4.53736	18.424	4.12779e-08	7.74592e-07	9.41522
51631	ENSG00000146963	LUC7L2	LUC7 like 2, pre-mRNA splicing factor	2.9518	3.12298	18.424	4.12783e-08	7.74592e-07	9.51127
1727	ENSG00000100243	CYB5R3	cytochrome b5 reductase 3	-1.47612	6.8763	-18.4221	4.13128e-08	7.74592e-07	9.26189
10024	ENSG00000135451	TROAP	trophinin associated protein	-2.28513	3.65193	-18.4213	4.13279e-08	7.74592e-07	9.47454
23022	ENSG00000129116	PALLD	palladin, cytoskeletal associated protein	2.97059	5.55153	18.4165	4.14164e-08	7.75738e-07	9.36275
102723356	NA	ZFPM2-AS1	ZFPM2 antisense RNA 1	2.01821	4.3876	18.4123	4.14943e-08	7.76684e-07	9.42868
1944	ENSG00000143590	EFNA3	ephrin A3	-1.99259	5.3462	-18.4096	4.15458e-08	7.77135e-07	9.33048
158747	ENSG00000130150	MOSPD2	motile sperm domain containing 2	2.70583	3.58887	18.4063	4.16076e-08	7.77779e-07	9.49742
84455	ENSG00000203965	EFCAB7	EF-hand calcium binding domain 7	2.36758	4.30124	18.3986	4.17505e-08	7.79937e-07	9.43936
9652	ENSG00000198677	SKIC3	SKI3 subunit of superkiller complex	1.81973	5.39766	18.3895	4.19211e-08	7.82567e-07	9.3304
57626	ENSG00000150361	KLHL1	kelch like family member 1	-8.11381	1.17277	-18.3872	4.19649e-08	7.82567e-07	7.96141
1933	ENSG00000114942	EEF1B2	eukaryotic translation elongation factor 1 beta 2	-1.84542	8.15748	-18.3867	4.19739e-08	7.82567e-07	9.2174
79685	ENSG00000164576	SAP30L	SAP30 like	1.91261	5.03094	18.3761	4.21739e-08	7.85779e-07	9.35403
54884	ENSG00000042445	RETSAT	retinol saturase	1.52141	6.48076	18.373	4.22325e-08	7.86355e-07	9.25977
27	ENSG00000143322	ABL2	ABL proto-oncogene 2, non-receptor tyrosine kinase	1.6337	5.12845	18.3634	4.24163e-08	7.89009e-07	9.3332
28969	ENSG00000136261	BZW2	basic leucine zipper and W2 domains 2	-1.63509	4.82455	-18.3616	4.24502e-08	7.89009e-07	9.33837
80270	ENSG00000099377	HSD3B7	hydroxy-delta-5-steroid dehydrogenase, 3 beta- and steroid delta-isomerase 7	-2.02724	4.82969	-18.3569	4.25399e-08	7.89009e-07	9.34261
51306	ENSG00000031003	FAM13B	family with sequence similarity 13 member B	1.70668	4.96616	18.3566	4.25465e-08	7.89009e-07	9.34411
4306	ENSG00000151623	NR3C2	nuclear receptor subfamily 3 group C member 2	2.21986	3.88268	18.3565	4.25476e-08	7.89009e-07	9.44784
5935	ENSG00000102317	RBM3	RNA binding motif protein 3	-1.42547	7.17704	-18.3561	4.25544e-08	7.89009e-07	9.22117
4707	ENSG00000183648	NDUFB1	NADH:ubiquinone oxidoreductase subunit B1	-1.89625	5.7883	-18.3554	4.25695e-08	7.89009e-07	9.27762
5130	ENSG00000161217	PCYT1A	phosphate cytidylyltransferase 1A, choline	1.88051	4.72878	18.3538	4.25998e-08	7.89055e-07	9.36693
6832	ENSG00000156502	SUPV3L1	Suv3 like RNA helicase	1.58233	6.61977	18.3491	4.26891e-08	7.90193e-07	9.24336
5604	ENSG00000169032	MAP2K1	mitogen-activated protein kinase kinase 1	1.47827	6.1031	18.3463	4.27436e-08	7.90687e-07	9.26299
10856	ENSG00000183207	RUVBL2	RuvB like AAA ATPase 2	-1.8779	6.53204	-18.3438	4.27904e-08	7.91037e-07	9.2386
23387	ENSG00000160584	SIK3	SIK family kinase 3	2.00929	4.52543	18.3353	4.29544e-08	7.93552e-07	9.37981
516	ENSG00000159199	ATP5MC1	ATP synthase membrane subunit c locus 1	-2.64568	5.37341	-18.3333	4.29938e-08	7.93764e-07	9.30396
54344	ENSG00000179085	DPM3	dolichyl-phosphate mannosyltransferase subunit 3, regulatory	-1.84439	5.27885	-18.3318	4.30221e-08	7.9377e-07	9.29536
55930	ENSG00000128833	MYO5C	myosin VC	1.73227	5.40739	18.3269	4.31181e-08	7.95025e-07	9.29783
5269	ENSG00000124570	SERPINB6	serpin family B member 6	-1.85895	7.46311	-18.3236	4.31813e-08	7.95673e-07	9.20031
115098	ENSG00000007080	CCDC124	coiled-coil domain containing 124	-1.58529	7.46738	-18.3161	4.33285e-08	7.96984e-07	9.19534
6768	ENSG00000149418	ST14	ST14 transmembrane serine protease matriptase	-1.58559	6.96353	-18.3159	4.33314e-08	7.96984e-07	9.2084
285527	ENSG00000075539	FRYL	FRY like transcription coactivator	1.89437	4.76583	18.3157	4.33366e-08	7.96984e-07	9.34597
10811	ENSG00000188747	NOXA1	NADPH oxidase activator 1	-1.85282	5.32398	-18.306	4.35256e-08	7.99292e-07	9.28019
2332	ENSG00000102081	FMR1	fragile X messenger ribonucleoprotein 1	2.00501	4.41569	18.3052	4.35423e-08	7.99292e-07	9.37453
79571	ENSG00000179562	GCC1	GRIP and coiled-coil domain containing 1	1.63844	5.05747	18.3049	4.35473e-08	7.99292e-07	9.31067
26227	ENSG00000092621	PHGDH	phosphoglycerate dehydrogenase	-1.9979	9.63155	-18.3024	4.3596e-08	7.99292e-07	9.15945
54991	ENSG00000131591	C1orf159	chromosome 1 open reading frame 159	-1.89194	4.56713	-18.3021	4.36029e-08	7.99292e-07	9.33471
145837	ENSG00000245750	DRAIC	downregulated RNA in cancer, inhibitor of cell invasion and migration	-2.76865	2.79581	-18.3	4.36436e-08	7.99523e-07	9.45766
283489	ENSG00000198824	CHAMP1	chromosome alignment maintaining phosphoprotein 1	2.46858	4.20196	18.2966	4.37103e-08	7.99792e-07	9.40278
10204	ENSG00000102898	NUTF2	nuclear transport factor 2	-1.67928	6.36755	-18.2964	4.37147e-08	7.99792e-07	9.22038
26469	ENSG00000072135	PTPN18	protein tyrosine phosphatase non-receptor type 18	-1.62723	5.67437	-18.2949	4.37438e-08	7.99811e-07	9.2518
84316	ENSG00000183011	NAA38	N-alpha-acetyltransferase 38, NatC auxiliary subunit	-2.50443	6.55912	-18.2908	4.38245e-08	8.00714e-07	9.21807
157695	ENSG00000180190	TDRP	testis development related protein	1.49981	5.91616	18.2896	4.38497e-08	8.00714e-07	9.24527
11140	ENSG00000105401	CDC37	cell division cycle 37, HSP90 cochaperone	-1.39522	7.93392	-18.2817	4.40055e-08	8.03044e-07	9.16879
168620	ENSG00000180535	BHLHA15	basic helix-loop-helix family member a15	4.02427	3.12843	18.2736	4.41666e-08	8.05003e-07	9.42283
56654	ENSG00000107281	NPDC1	neural proliferation, differentiation and control 1	-2.58323	7.01339	-18.2734	4.41696e-08	8.05003e-07	9.19399
4521	ENSG00000106268	NUDT1	nudix hydrolase 1	-2.35619	3.66379	-18.2648	4.43428e-08	8.07642e-07	9.40173
6723	ENSG00000116649	SRM	spermidine synthase	-2.37175	6.98665	-18.2624	4.43908e-08	8.07998e-07	9.18747
10162	ENSG00000111684	LPCAT3	lysophosphatidylcholine acyltransferase 3	-1.49094	6.44286	-18.2596	4.44464e-08	8.08491e-07	9.19818
138716	ENSG00000164967	RPP25L	ribonuclease P/MRP subunit p25 like	-2.12246	5.41602	-18.2416	4.48092e-08	8.14569e-07	9.24725
114876	ENSG00000141447	OSBPL1A	oxysterol binding protein like 1A	2.20888	4.74182	18.2377	4.48896e-08	8.15416e-07	9.32025
5425	ENSG00000106628	POLD2	DNA polymerase delta 2, accessory subunit	-1.64222	7.96822	-18.2347	4.49508e-08	8.15416e-07	9.14589
125988	ENSG00000174917	MICOS13	mitochondrial contact site and cristae organizing system subunit 13	-2.57554	6.03554	-18.2334	4.49757e-08	8.15416e-07	9.21503
54765	ENSG00000166326	TRIM44	tripartite motif containing 44	1.62418	6.80389	18.2331	4.49834e-08	8.15416e-07	9.18046
23462	ENSG00000164683	HEY1	hes related family bHLH transcription factor with YRPW motif 1	6.25317	1.62039	18.2317	4.50099e-08	8.15416e-07	8.51701
81620	ENSG00000167513	CDT1	chromatin licensing and DNA replication factor 1	-1.89525	4.31496	-18.2284	4.50777e-08	8.15416e-07	9.32049
5338	ENSG00000129219	PLD2	phospholipase D2	-2.39918	4.10592	-18.2267	4.51123e-08	8.15416e-07	9.35052
192286	ENSG00000146066	HIGD2A	HIG1 hypoxia inducible domain family member 2A	-1.55072	6.86347	-18.2244	4.51605e-08	8.15416e-07	9.16666
54467	ENSG00000001629	ANKIB1	ankyrin repeat and IBR domain containing 1	2.28104	5.07681	18.2242	4.51649e-08	8.15416e-07	9.28742
10018	ENSG00000153094	BCL2L11	BCL2 like 11	1.73793	5.01922	18.2241	4.51658e-08	8.15416e-07	9.27723
23516	ENSG00000104635	SLC39A14	solute carrier family 39 member 14	1.65766	6.1117	18.2238	4.51717e-08	8.15416e-07	9.20567
81573	ENSG00000118454	ANKRD13C	ankyrin repeat domain 13C	1.79268	4.83595	18.2219	4.52104e-08	8.15597e-07	9.29278
116039	ENSG00000164920	OSR2	odd-skipped related transciption factor 2	-2.8742	3.18183	-18.2151	4.53505e-08	8.17241e-07	9.41502
1728	ENSG00000181019	NQO1	NAD(P)H quinone dehydrogenase 1	-2.12214	4.54525	-18.2147	4.53591e-08	8.17241e-07	9.29961
7533	ENSG00000128245	YWHAH	tyrosine 3-monooxygenase/tryptophan 5-monooxygenase activation protein eta	1.52138	6.0215	18.2044	4.5571e-08	8.20538e-07	9.19888
105369205	NA	NA	NA	-4.89389	1.35036	-18.1988	4.56859e-08	8.22086e-07	8.93378
51804	ENSG00000100625	SIX4	SIX homeobox 4	2.08827	3.90087	18.1968	4.57284e-08	8.2233e-07	9.36869
10491	ENSG00000170275	CRTAP	cartilage associated protein	-1.57026	5.68919	-18.1857	4.59589e-08	8.25952e-07	9.19747
10818	ENSG00000166225	FRS2	fibroblast growth factor receptor substrate 2	2.15427	4.31545	18.1598	4.65023e-08	8.35189e-07	9.31873
197320	ENSG00000170100	ZNF778	zinc finger protein 778	1.72676	5.13881	18.1525	4.66566e-08	8.37052e-07	9.23326
6419	ENSG00000170364	SETMAR	SET domain and mariner transposase fusion gene	-1.74414	4.72554	-18.1521	4.6665e-08	8.37052e-07	9.24716
11196	ENSG00000107651	SEC23IP	SEC23 interacting protein	1.92921	5.80156	18.1506	4.66964e-08	8.37086e-07	9.19133
401548	ENSG00000148158	SNX30	sorting nexin family member 30	2.10047	3.97896	18.1492	4.67269e-08	8.37105e-07	9.34065
65124	ENSG00000198142	SOWAHC	sosondowah ankyrin repeat domain family member C	2.14019	3.83191	18.1313	4.71078e-08	8.43395e-07	9.34391
11041	ENSG00000174684	B4GAT1	beta-1,4-glucuronyltransferase 1	-1.89749	4.13264	-18.1275	4.71903e-08	8.44341e-07	9.28764
8500	ENSG00000131626	PPFIA1	PTPRF interacting protein alpha 1	1.80238	6.11718	18.1197	4.73575e-08	8.46389e-07	9.15678
2744	ENSG00000115419	GLS	glutaminase	1.69815	4.99381	18.1194	4.73644e-08	8.46389e-07	9.22781
58485	ENSG00000170043	TRAPPC1	trafficking protein particle complex subunit 1	-2.92828	5.8847	-18.1174	4.74073e-08	8.46622e-07	9.17274
6386	ENSG00000137575	SDCBP	syndecan binding protein	1.44181	6.32788	18.1109	4.75485e-08	8.48545e-07	9.13774
140467	ENSG00000198816	ZNF358	zinc finger protein 358	-2.54291	7.05508	-18.1093	4.75833e-08	8.48545e-07	9.11195
10735	ENSG00000101972	STAG2	STAG2 cohesin complex component	1.69892	6.63877	18.1083	4.76046e-08	8.48545e-07	9.12653
1491	ENSG00000116761	CTH	cystathionine gamma-lyase	1.94576	4.55897	18.1038	4.77028e-08	8.49275e-07	9.26396
22882	ENSG00000178764	ZHX2	zinc fingers and homeoboxes 2	1.76943	5.44349	18.1033	4.77119e-08	8.49275e-07	9.18796
91057	ENSG00000109881	CCDC34	coiled-coil domain containing 34	-2.37859	4.36987	-18.1023	4.77353e-08	8.49275e-07	9.26679
23078	ENSG00000102763	VWA8	von Willebrand factor A domain containing 8	1.93493	4.10795	18.0892	4.80196e-08	8.53799e-07	9.2967
138162	ENSG00000160345	PIERCE1	piercer of microtubule wall 1	-2.50278	2.94145	-18.0859	4.80935e-08	8.54307e-07	9.35871
3017	ENSG00000158373	H2BC5	H2B clustered histone 5	2.11476	3.90472	18.0852	4.81084e-08	8.54307e-07	9.31609
8503	ENSG00000117461	PIK3R3	phosphoinositide-3-kinase regulatory subunit 3	-1.71721	5.37625	-18.0817	4.81849e-08	8.55132e-07	9.1664
147841	ENSG00000161888	SPC24	SPC24 component of NDC80 kinetochore complex	-3.08425	2.97991	-18.0787	4.82501e-08	8.55753e-07	9.35795
8650	ENSG00000133961	NUMB	NUMB endocytic adaptor protein	2.02284	5.67566	18.0749	4.83351e-08	8.56634e-07	9.16407
124936	ENSG00000167740	CYB5D2	cytochrome b5 domain containing 2	-1.79975	5.38161	-18.0737	4.83601e-08	8.56634e-07	9.16325
51762	ENSG00000166128	RAB8B	RAB8B, member RAS oncogene family	1.85251	4.27896	18.0629	4.86003e-08	8.60352e-07	9.26668
81832	ENSG00000166342	NETO1	neuropilin and tolloid like 1	-1.64884	4.98499	-18.0564	4.87443e-08	8.62365e-07	9.17939
55088	ENSG00000165813	CCDC186	coiled-coil domain containing 186	1.73224	5.72171	18.0496	4.88961e-08	8.64512e-07	9.1431
3491	ENSG00000142871	CCN1	cellular communication network factor 1	2.04324	3.94938	18.0417	4.90727e-08	8.67093e-07	9.28996
124930	ENSG00000198720	ANKRD13B	ankyrin repeat domain 13B	-1.78163	4.28747	-18.038	4.91553e-08	8.67885e-07	9.22868
311	ENSG00000122359	ANXA11	annexin A11	-1.66104	6.79134	-18.037	4.91786e-08	8.67885e-07	9.07777
80830	ENSG00000221963	APOL6	apolipoprotein L6	4.29847	2.09056	18.0353	4.92158e-08	8.68001e-07	9.10362
51101	ENSG00000104427	ZC2HC1A	zinc finger C2HC-type containing 1A	2.66923	3.3758	18.0311	4.93108e-08	8.68616e-07	9.33213
158160	ENSG00000290439	HSD17B7P2	hydroxysteroid 17-beta dehydrogenase 7 pseudogene 2	2.04712	3.92293	18.0311	4.93118e-08	8.68616e-07	9.28731
163183	ENSG00000181392	SYNE4	spectrin repeat containing nuclear envelope family member 4	-1.87891	6.14438	-18.0273	4.93962e-08	8.69562e-07	9.10019
112817	ENSG00000241935	HOGA1	4-hydroxy-2-oxoglutarate aldolase 1	-1.95702	3.82384	-18.0216	4.95254e-08	8.71297e-07	9.26518
2947	ENSG00000134202	GSTM3	glutathione S-transferase mu 3	-1.86068	6.28577	-18.0201	4.95596e-08	8.71358e-07	9.09026
339229	ENSG00000204237	OXLD1	oxidoreductase like domain containing 1	-2.0988	6.04522	-18.0153	4.96679e-08	8.72133e-07	9.10141
93663	ENSG00000146376	ARHGAP18	Rho GTPase activating protein 18	2.41369	3.608	18.0149	4.96773e-08	8.72133e-07	9.31019
51068	ENSG00000169251	NMD3	NMD3 ribosome export adaptor	2.05157	5.02151	18.0141	4.96958e-08	8.72133e-07	9.18424
826	ENSG00000126247	CAPNS1	calpain small subunit 1	-1.58724	8.27104	-18.0119	4.9746e-08	8.72476e-07	9.03123
51361	ENSG00000134709	HOOK1	hook microtubule tethering protein 1	1.95672	4.98429	18.009	4.98125e-08	8.73028e-07	9.1816
6385	ENSG00000124145	SDC4	syndecan 4	-1.64382	5.46259	-18.0078	4.9839e-08	8.73028e-07	9.12411
706	ENSG00000100300	TSPO	translocator protein	-2.71182	6.41373	-18.0009	4.99965e-08	8.75247e-07	9.08503
283232	ENSG00000177042	TMEM80	transmembrane protein 80	-2.00227	4.32321	-17.9976	5.00722e-08	8.76032e-07	9.21116
389541	ENSG00000188186	LAMTOR4	late endosomal/lysosomal adaptor, MAPK and MTOR activator 4	-2.08881	6.04736	-17.9931	5.01768e-08	8.77322e-07	9.09022
27243	ENSG00000130724	CHMP2A	charged multivesicular body protein 2A	-1.62433	7.5875	-17.9907	5.02313e-08	8.77735e-07	9.03307
402483	NA	LINC01000	long intergenic non-protein coding RNA 1000	1.93219	6.09392	17.9865	5.03282e-08	8.78886e-07	9.09473
84612	ENSG00000124171	PARD6B	par-6 family cell polarity regulator beta	2.64939	3.07051	17.9823	5.04245e-08	8.80026e-07	9.31431
6628	ENSG00000125835	SNRPB	small nuclear ribonucleoprotein polypeptides B and B1	-1.38563	7.30107	-17.9778	5.053e-08	8.81327e-07	9.03235
55074	ENSG00000164830	OXR1	oxidation resistance 1	2.57009	4.11948	17.9668	5.07849e-08	8.84158e-07	9.25617
134430	ENSG00000134987	WDR36	WD repeat domain 36	1.83019	4.78437	17.9663	5.07971e-08	8.84158e-07	9.17452
266747	ENSG00000159496	RGL4	ral guanine nucleotide dissociation stimulator like 4	2.15925	4.22694	17.9653	5.08198e-08	8.84158e-07	9.23355
282974	ENSG00000165752	STK32C	serine/threonine kinase 32C	-2.13655	5.51907	-17.9637	5.08584e-08	8.84158e-07	9.10562
7846	ENSG00000167552	TUBA1A	tubulin alpha 1a	-2.39498	3.21577	-17.9629	5.08751e-08	8.84158e-07	9.2897
22878	ENSG00000153339	TRAPPC8	trafficking protein particle complex subunit 8	3.41384	4.78091	17.9628	5.08791e-08	8.84158e-07	9.22736
57185	ENSG00000001461	NIPAL3	NIPA like domain containing 3	-1.61313	5.21713	-17.9604	5.09337e-08	8.84565e-07	9.11599
152559	ENSG00000163291	PAQR3	progestin and adipoQ receptor family member 3	2.80576	3.08227	17.957	5.10133e-08	8.85404e-07	9.30264
9400	ENSG00000108469	RECQL5	RecQ like helicase 5	-1.60294	5.40718	-17.9545	5.10725e-08	8.8589e-07	9.10085
51386	ENSG00000100129	EIF3L	eukaryotic translation initiation factor 3 subunit L	-1.62214	8.55341	-17.9327	5.15873e-08	8.94274e-07	8.98797
26088	ENSG00000100083	GGA1	golgi associated, gamma adaptin ear containing, ARF binding protein 1	-1.4635	7.25226	-17.9296	5.16613e-08	8.95011e-07	9.00993
51466	ENSG00000196405	EVL	Enah/Vasp-like	-2.02452	5.38158	-17.9228	5.18225e-08	8.96765e-07	9.0925
28974	ENSG00000104979	C19orf53	chromosome 19 open reading frame 53	-2.0665	7.23255	-17.9226	5.18257e-08	8.96765e-07	9.01039
1155	ENSG00000105254	TBCB	tubulin folding cofactor B	-1.55828	6.81153	-17.9126	5.20647e-08	9.00199e-07	9.01489
51295	ENSG00000130159	ECSIT	ECSIT signaling integrator	-1.74698	5.70608	-17.9109	5.21069e-08	9.00199e-07	9.06347
23548	ENSG00000113638	TTC33	tetratricopeptide repeat domain 33	2.33547	3.53788	17.9104	5.21193e-08	9.00199e-07	9.26352
56946	ENSG00000158636	EMSY	EMSY transcriptional repressor, BRCA2 interacting	1.9229	4.55624	17.905	5.2248e-08	9.01874e-07	9.16737
1153	ENSG00000099622	CIRBP	cold inducible RNA binding protein	-1.64723	8.54308	-17.8932	5.25323e-08	9.0623e-07	8.9685
64397	ENSG00000103994	ZNF106	zinc finger protein 106	1.67606	6.32402	17.8866	5.26934e-08	9.08458e-07	9.03025
440926	NA	H3P6	H3 histone pseudogene 6	-2.22208	4.96247	-17.885	5.27311e-08	9.08556e-07	9.10779
53981	ENSG00000165934	CPSF2	cleavage and polyadenylation specific factor 2	1.42923	6.29475	17.8813	5.28226e-08	9.0958e-07	9.0258
6576	ENSG00000100075	SLC25A1	solute carrier family 25 member 1	-1.94755	7.20567	-17.8684	5.31356e-08	9.14416e-07	8.98338
10573	ENSG00000086504	MRPL28	mitochondrial ribosomal protein L28	-2.36136	6.3538	-17.8625	5.32817e-08	9.16374e-07	9.01474
9213	ENSG00000143324	XPR1	xenotropic and polytropic retrovirus receptor 1	2.24682	5.17052	17.8489	5.3618e-08	9.20877e-07	9.09599
10133	ENSG00000123240	OPTN	optineurin	3.02081	5.23662	17.8485	5.3627e-08	9.20877e-07	9.11857
5274	ENSG00000163536	SERPINI1	serpin family I member 1	-2.13747	4.65909	-17.8479	5.36408e-08	9.20877e-07	9.11188
55841	ENSG00000047644	WWC3	WWC family member 3	1.93254	4.66533	17.8459	5.36918e-08	9.21009e-07	9.12936
283450	ENSG00000173064	HECTD4	HECT domain E3 ubiquitin protein ligase 4	2.7141	6.23261	17.8438	5.37432e-08	9.21009e-07	9.03154
9929	ENSG00000100221	JOSD1	Josephin domain containing 1	1.41038	6.5613	17.8437	5.37458e-08	9.21009e-07	8.99566
23507	ENSG00000197147	LRRC8B	leucine rich repeat containing 8 VRAC subunit B	1.93104	4.58222	17.8406	5.3824e-08	9.21793e-07	9.13379
55529	ENSG00000155099	PIP4P2	phosphatidylinositol-4,5-bisphosphate 4-phosphatase 2	2.44622	3.20297	17.8343	5.39796e-08	9.2351e-07	9.24348
168850	ENSG00000048405	ZNF800	zinc finger protein 800	2.35031	4.55698	17.8339	5.39893e-08	9.2351e-07	9.1465
547	ENSG00000130294	KIF1A	kinesin family member 1A	1.43812	7.58772	17.8279	5.41404e-08	9.25536e-07	8.95536
9874	ENSG00000198586	TLK1	tousled like kinase 1	1.54528	5.56014	17.8264	5.41768e-08	9.25601e-07	9.03991
29116	ENSG00000007944	MYLIP	myosin regulatory light chain interacting protein	1.86668	4.35239	17.8213	5.43061e-08	9.26979e-07	9.14361
113178	ENSG00000227500	SCAMP4	secretory carrier membrane protein 4	-1.4234	7.57573	-17.8206	5.43227e-08	9.26979e-07	8.94796
51780	ENSG00000120733	KDM3B	lysine demethylase 3B	2.06987	6.20816	17.8162	5.44338e-08	9.27909e-07	9.00673
50810	ENSG00000166503	HDGFL3	HDGF like 3	1.62071	5.05215	17.8151	5.44623e-08	9.27909e-07	9.07248
22911	ENSG00000085433	WDR47	WD repeat domain 47	2.77547	3.62987	17.8139	5.44922e-08	9.27909e-07	9.22195
65993	ENSG00000074071	MRPS34	mitochondrial ribosomal protein S34	-1.80671	6.61612	-17.8132	5.45079e-08	9.27909e-07	8.97394
80162	ENSG00000142102	PGGHG	protein-glucosylgalactosylhydroxylysine glucosidase	-2.19161	5.71052	-17.81	5.4589e-08	9.28733e-07	9.0191
192670	ENSG00000134698	AGO4	argonaute RISC component 4	2.3329	5.10849	17.8086	5.46242e-08	9.28775e-07	9.08415
170960	ENSG00000182903	ZNF721	zinc finger protein 721	1.79978	4.72098	17.8022	5.47884e-08	9.30894e-07	9.09867
9147	ENSG00000165525	NEMF	nuclear export mediator factor	-1.44864	6.4394	-17.8011	5.48144e-08	9.30894e-07	8.97209
5138	ENSG00000186642	PDE2A	phosphodiesterase 2A	2.97758	2.77327	17.7964	5.49357e-08	9.32397e-07	9.21893
5074	ENSG00000177425	PAWR	pro-apoptotic WT1 regulator	1.54287	6.13459	17.7918	5.50527e-08	9.33824e-07	8.99029
324	ENSG00000134982	APC	APC regulator of WNT signaling pathway	2.33641	3.90675	17.7902	5.50932e-08	9.33953e-07	9.18132
727800	ENSG00000212864	RNF208	ring finger protein 208	-3.86266	3.95435	-17.7887	5.51314e-08	9.34043e-07	9.19755
5270	ENSG00000135919	SERPINE2	serpin family E member 2	3.20785	2.86729	17.7865	5.51866e-08	9.34421e-07	9.21385
23291	ENSG00000072803	FBXW11	F-box and WD repeat domain containing 11	1.48119	5.5829	17.7814	5.53172e-08	9.36074e-07	9.01495
735301	NA	SNHG9	small nucleolar RNA host gene 9	-2.07349	4.11849	-17.7649	5.57418e-08	9.42145e-07	9.11709
2740	ENSG00000112164	GLP1R	glucagon like peptide 1 receptor	-4.86868	2.06409	-17.7649	5.57423e-08	9.42145e-07	9.02292
102724023	ENSG00000280071	LOC102724023	glutamine amidotransferase class 1 domain containing 3B	-2.22228	3.91602	-17.7619	5.58193e-08	9.42884e-07	9.13837
25909	ENSG00000153207	AHCTF1	AT-hook containing transcription factor 1	2.4027	5.74435	17.7605	5.58575e-08	9.42968e-07	9.01331
6001	ENSG00000148908	RGS10	regulator of G protein signaling 10	-2.13081	4.45308	-17.7525	5.60649e-08	9.45907e-07	9.08374
8545	ENSG00000163320	CGGBP1	CGG triplet repeat binding protein 1	1.61526	6.38127	17.7482	5.61751e-08	9.47205e-07	8.95803
126299	ENSG00000131116	ZNF428	zinc finger protein 428	-1.76253	4.55696	-17.7364	5.64845e-08	9.51856e-07	9.05793
221710	ENSG00000224531	SMIM13	small integral membrane protein 13	2.4554	4.3945	17.7348	5.65268e-08	9.52003e-07	9.11843
9710	ENSG00000166398	GARRE1	granule associated Rac and RHOG effector 1	3.63481	3.43797	17.7313	5.66173e-08	9.52963e-07	9.19911
23640	ENSG00000133265	HSPBP1	HSPA (Hsp70) binding protein 1	-1.91184	6.07659	-17.7277	5.67141e-08	9.54027e-07	8.95506
10169	ENSG00000140264	SERF2	small EDRK-rich factor 2	-2.11401	7.48429	-17.7217	5.68719e-08	9.56115e-07	8.90364
6339	ENSG00000162572	SCNN1D	sodium channel epithelial 1 subunit delta	-2.13312	4.62385	-17.7201	5.69133e-08	9.56245e-07	9.05234
51367	ENSG00000167272	POP5	POP5 homolog, ribonuclease P/MRP subunit	-2.15146	5.04048	-17.7129	5.71059e-08	9.58533e-07	9.01538
9880	ENSG00000166860	ZBTB39	zinc finger and BTB domain containing 39	3.80158	2.17878	17.7117	5.71368e-08	9.58533e-07	9.05505
124739	ENSG00000154914	USP43	ubiquitin specific peptidase 43	2.11933	3.68495	17.7112	5.71508e-08	9.58533e-07	9.15441
254552	ENSG00000167799	NUDT8	nudix hydrolase 8	-3.51183	5.16336	-17.737	5.7211e-08	9.58977e-07	9.04285
550112	ENSG00000248049	UBA6-DT	UBA6 divergent transcript	1.70116	4.82213	17.6971	5.75258e-08	9.63685e-07	9.03529
51526	ENSG00000132823	OSER1	oxidative stress responsive serine rich 1	1.67939	6.30999	17.6953	5.75737e-08	9.63775e-07	8.93567
80205	ENSG00000177200	CHD9	chromodomain helicase DNA binding protein 9	1.84246	5.05469	17.6944	5.75991e-08	9.63775e-07	9.01841
4643	ENSG00000157483	MYO1E	myosin IE	2.60821	4.54114	17.6905	5.77041e-08	9.64964e-07	9.08695
79846	ENSG00000105792	CFAP69	cilia and flagella associated protein 69	-1.77117	5.26877	-17.6868	5.78017e-08	9.65509e-07	8.97926
9462	ENSG00000075391	RASAL2	RAS protein activator like 2	2.15864	3.76523	17.6867	5.78047e-08	9.65509e-07	9.1375
8672	ENSG00000075151	EIF4G3	eukaryotic translation initiation factor 4 gamma 3	2.06675	6.38844	17.6847	5.78607e-08	9.65876e-07	8.93207
51090	ENSG00000102934	PLLP	plasmolipin	-2.52426	2.86491	-17.676	5.80935e-08	9.69192e-07	9.17066
11182	ENSG00000160326	SLC2A6	solute carrier family 2 member 6	-2.21878	3.71537	-17.6687	5.82922e-08	9.71616e-07	9.11029
56911	ENSG00000156265	MAP3K7CL	MAP3K7 C-terminal like	4.07032	2.46583	17.6682	5.83072e-08	9.71616e-07	9.06822
9702	ENSG00000166037	CEP57	centrosomal protein 57	2.19991	5.57183	17.6665	5.83525e-08	9.71801e-07	8.97344
79033	ENSG00000117419	ERI3	ERI1 exoribonuclease family member 3	-1.83853	6.5753	-17.6602	5.8523e-08	9.74069e-07	8.89902
3909	ENSG00000053747	LAMA3	laminin subunit alpha 3	2.3401	6.73761	17.6548	5.86721e-08	9.74881e-07	8.90567
23457	ENSG00000150967	ABCB9	ATP binding cassette subfamily B member 9	-2.28392	3.40005	-17.6543	5.86842e-08	9.74881e-07	9.12927
5245	ENSG00000167085	PHB1	prohibitin 1	-2.02272	7.60633	-17.6539	5.86964e-08	9.74881e-07	8.86603
8815	ENSG00000175334	BANF1	BAF nuclear assembly factor 1	-2.13879	7.22861	-17.6534	5.87092e-08	9.74881e-07	8.8762
54456	ENSG00000073146	MOV10L1	Mov10 like RISC complex RNA helicase 1	2.9007	4.05772	17.6472	5.88813e-08	9.77168e-07	9.11969
1829	ENSG00000046604	DSG2	desmoglein 2	1.75996	6.10415	17.643	5.89962e-08	9.78502e-07	8.92048
84790	ENSG00000167553	TUBA1C	tubulin alpha 1c	-1.31696	7.44218	-17.6401	5.90749e-08	9.79236e-07	8.85978
57169	ENSG00000124201	ZNFX1	zinc finger NFX1-type containing 1	1.64181	6.06529	17.6378	5.91383e-08	9.79716e-07	8.9182
375790	ENSG00000188157	AGRN	agrin	-1.82054	6.38209	-17.6362	5.91819e-08	9.79866e-07	8.89455
8556	ENSG00000079335	CDC14A	cell division cycle 14A	2.85496	3.38657	17.6287	5.93916e-08	9.82765e-07	9.14621
112479	ENSG00000196678	ERI2	ERI1 exoribonuclease family member 2	2.94771	3.10024	17.6272	5.94331e-08	9.82879e-07	9.15086
2799	ENSG00000135677	GNS	glucosamine (N-acetyl)-6-sulfatase	1.44054	7.37821	17.6228	5.95545e-08	9.84314e-07	8.85763
7102	ENSG00000156298	TSPAN7	tetraspanin 7	2.09423	3.67118	17.6172	5.97113e-08	9.8633e-07	9.10954
3925	ENSG00000117632	STMN1	stathmin 1	-2.61519	5.01765	-17.6156	5.97564e-08	9.86358e-07	8.97896
5991	ENSG00000080298	RFX3	regulatory factor X3	-2.02059	4.36123	-17.6146	5.97824e-08	9.86358e-07	9.02074
100289341	ENSG00000268996	MAN1B1-DT	MAN1B1 divergent transcript	-2.30894	3.42112	-17.6115	5.98714e-08	9.86738e-07	9.10775
142680	ENSG00000198569	SLC34A3	solute carrier family 34 member 3	-3.99947	1.65017	-17.6113	5.9875e-08	9.86738e-07	8.95384
8541	ENSG00000177380	PPFIA3	PTPRF interacting protein alpha 3	-1.71652	5.25548	-17.61	5.99129e-08	9.86791e-07	8.94081
51330	ENSG00000006327	TNFRSF12A	TNF receptor superfamily member 12A	2.31504	5.32398	17.6056	6.0037e-08	9.88261e-07	8.96576
7109	ENSG00000160218	TRAPPC10	trafficking protein particle complex subunit 10	3.77668	4.09617	17.5945	6.03472e-08	9.92718e-07	9.11487
1513	ENSG00000143387	CTSK	cathepsin K	-3.01265	2.29437	-17.5935	6.03777e-08	9.92718e-07	9.1187
51059	ENSG00000147724	FAM135B	family with sequence similarity 135 member B	3.25373	2.61809	17.5916	6.04313e-08	9.93025e-07	9.10833
8607	ENSG00000175792	RUVBL1	RuvB like AAA ATPase 1	-1.96736	6.52349	-17.587	6.05608e-08	9.94577e-07	8.86528
27244	ENSG00000080546	SESN1	sestrin 1	1.63395	6.04509	17.5849	6.06204e-08	9.94981e-07	8.89251
124808	ENSG00000180329	CCDC43	coiled-coil domain containing 43	2.32248	3.35726	17.5816	6.07134e-08	9.95931e-07	9.11686
91404	ENSG00000187231	SESTD1	SEC14 and spectrin domain containing 1	2.7902	3.23658	17.5736	6.09421e-08	9.99106e-07	9.12373
51091	ENSG00000109618	SEPSECS	Sep (O-phosphoserine) tRNA:Sec (selenocysteine) tRNA synthase	1.90726	4.74957	17.5717	6.09964e-08	9.99225e-07	8.98563
10682	ENSG00000147155	EBP	EBP cholestenol delta-isomerase	-2.14431	5.0805	-17.5709	6.10197e-08	9.99225e-07	8.94112
2879	ENSG00000167468	GPX4	glutathione peroxidase 4	-1.93774	8.63558	-17.569	6.10732e-08	9.99524e-07	8.80462
2356	ENSG00000136877	FPGS	folylpolyglutamate synthase	-1.64628	6.39971	-17.5678	6.11084e-08	9.99524e-07	8.85786
153364	ENSG00000176055	MBLAC2	metallo-beta-lactamase domain containing 2	1.85694	4.183	17.5622	6.1269e-08	1.00106e-06	9.03214
55187	ENSG00000048707	VPS13D	vacuolar protein sorting 13 homolog D	1.89721	6.00465	17.562	6.12729e-08	1.00106e-06	8.88734
976	ENSG00000123146	ADGRE5	adhesion G protein-coupled receptor E5	-1.83534	4.53481	-17.5508	6.15975e-08	1.00579e-06	8.96953
8451	ENSG00000139842	CUL4A	cullin 4A	1.50793	6.19439	17.5384	6.19562e-08	1.01106e-06	8.85968
55279	ENSG00000175105	ZNF654	zinc finger protein 654	2.49778	4.21253	17.5342	6.2079e-08	1.01248e-06	9.03691
79159	ENSG00000273899	NOL12	nucleolar protein 12	-1.74937	4.78753	-17.5316	6.21556e-08	1.01315e-06	8.93703
9897	ENSG00000164961	WASHC5	WASH complex subunit 5	1.51059	5.56147	17.5278	6.22643e-08	1.01434e-06	8.8899
7182	ENSG00000177463	NR2C2	nuclear receptor subfamily 2 group C member 2	2.55297	3.58597	17.5229	6.2408e-08	1.0161e-06	9.08072
3320	ENSG00000080824	HSP90AA1	heat shock protein 90 alpha family class A member 1	-1.51487	10.2047	-17.5175	6.25686e-08	1.01813e-06	8.76303
64398	ENSG00000072415	PALS1	protein associated with LIN7 1, MAGUK p55 family member	1.58457	5.54271	17.5147	6.26494e-08	1.01855e-06	8.88574
868	ENSG00000114423	CBLB	Cbl proto-oncogene B	1.91371	4.7393	17.5142	6.26662e-08	1.01855e-06	8.95786
55294	ENSG00000109670	FBXW7	F-box and WD repeat domain containing 7	1.95393	4.64775	17.5127	6.27089e-08	1.01866e-06	8.96752
54948	ENSG00000166902	MRPL16	mitochondrial ribosomal protein L16	-2.20797	5.1414	-17.511	6.27601e-08	1.01891e-06	8.90787
518	ENSG00000154518	ATP5MC3	ATP synthase membrane subunit c locus 3	-1.61144	6.38397	-17.5053	6.29266e-08	1.02103e-06	8.82655
126792	ENSG00000176022	B3GALT6	beta-1,3-galactosyltransferase 6	-2.74041	6.06085	-17.5032	6.29893e-08	1.02146e-06	8.85458
8615	ENSG00000138768	USO1	USO1 vesicle transport factor	1.8965	6.20909	17.5015	6.30401e-08	1.02155e-06	8.8459
4548	ENSG00000116984	MTR	5-methyltetrahydrofolate-homocysteine methyltransferase	1.64359	5.28522	17.5006	6.30669e-08	1.02155e-06	8.89797
5831	ENSG00000183010	PYCR1	pyrroline-5-carboxylate reductase 1	-1.27769	8.12822	-17.4885	6.34269e-08	1.0268e-06	8.76965
7284	ENSG00000178952	TUFM	Tu translation elongation factor, mitochondrial	-1.55877	7.70815	-17.4793	6.37012e-08	1.03065e-06	8.77326
375775	ENSG00000130653	PNPLA7	patatin like phospholipase domain containing 7	-2.08329	5.29359	-17.4767	6.378e-08	1.03134e-06	8.87714
10579	ENSG00000138162	TACC2	transforming acidic coiled-coil containing protein 2	1.68334	7.22389	17.4736	6.38753e-08	1.03175e-06	8.78836
22887	ENSG00000198815	FOXJ3	forkhead box J3	1.65592	6.19473	17.4735	6.38782e-08	1.03175e-06	8.82883
5901	ENSG00000132341	RAN	RAN, member RAS oncogene family	-1.31259	7.94332	-17.4664	6.40897e-08	1.03458e-06	8.76153
4651	ENSG00000145555	MYO10	myosin X	2.89171	6.03776	17.4632	6.41891e-08	1.03533e-06	8.85708
8491	ENSG00000011566	MAP4K3	mitogen-activated protein kinase kinase kinase kinase 3	2.61696	3.33407	17.4625	6.42092e-08	1.03533e-06	9.06649
55614	ENSG00000089177	KIF16B	kinesin family member 16B	3.06471	3.6614	17.4584	6.43318e-08	1.03672e-06	9.05687
6228	ENSG00000186468	RPS23	ribosomal protein S23	-2.03495	9.7753	-17.4386	6.4937e-08	1.04588e-06	8.72642
7398	ENSG00000162607	USP1	ubiquitin specific peptidase 1	1.65003	5.0929	17.4359	6.50201e-08	1.04662e-06	8.88061
260425	ENSG00000081026	MAGI3	membrane associated guanylate kinase, WW and PDZ domain containing 3	1.99801	4.13485	17.432	6.51392e-08	1.04795e-06	8.97644
23545	ENSG00000185344	ATP6V0A2	ATPase H+ transporting V0 subunit a2	1.95081	4.45297	17.4287	6.52425e-08	1.04877e-06	8.94313
7188	ENSG00000082512	TRAF5	TNF receptor associated factor 5	3.13212	2.73992	17.428	6.5264e-08	1.04877e-06	9.04689
771	ENSG00000074410	CA12	carbonic anhydrase 12	-2.34036	2.98766	-17.4235	6.54023e-08	1.05039e-06	9.04437
9045	ENSG00000188846	RPL14	ribosomal protein L14	-2.05911	9.87869	-17.4169	6.56061e-08	1.05307e-06	8.71453
10650	ENSG00000141391	PRELID3A	PRELI domain containing 3A	2.01611	3.8359	17.4144	6.56848e-08	1.05374e-06	8.99503
10330	ENSG00000257727	CNPY2	canopy FGF signaling regulator 2	-1.66032	6.99979	-17.4085	6.58681e-08	1.05608e-06	8.75537
5989	ENSG00000132005	RFX1	regulatory factor X1	2.33736	4.23745	17.4057	6.59528e-08	1.05685e-06	8.96612
55236	ENSG00000033178	UBA6	ubiquitin like modifier activating enzyme 6	1.5384	5.27872	17.3985	6.61804e-08	1.05989e-06	8.84467
7699	ENSG00000196387	ZNF140	zinc finger protein 140	1.60911	5.07678	17.3894	6.64662e-08	1.0638e-06	8.85725
84264	ENSG00000103253	HAGHL	hydroxyacylglutathione hydrolase like	-3.23838	5.14402	-17.3883	6.64993e-08	1.0638e-06	8.87275
92714	ENSG00000197070	ARRDC1	arrestin domain containing 1	-1.66623	6.44657	-17.3829	6.66708e-08	1.06594e-06	8.76203
79763	ENSG00000063241	ISOC2	isochorismatase domain containing 2	-2.2452	6.27668	-17.3815	6.67141e-08	1.06604e-06	8.77446
23625	ENSG00000176973	FAM89B	family with sequence similarity 89 member B	-1.70854	5.89683	-17.3751	6.69161e-08	1.06866e-06	8.78373
7077	ENSG00000035862	TIMP2	TIMP metallopeptidase inhibitor 2	-2.05106	4.01626	-17.3729	6.69862e-08	1.06918e-06	8.93334
8932	ENSG00000134046	MBD2	methyl-CpG binding domain protein 2	1.61727	6.05704	17.3701	6.70743e-08	1.06999e-06	8.78261
144404	ENSG00000188735	TMEM120B	transmembrane protein 120B	-1.60721	4.9024	-17.3624	6.73194e-08	1.07329e-06	8.84028
4216	ENSG00000085511	MAP3K4	mitogen-activated protein kinase kinase kinase 4	1.71986	5.12992	17.3611	6.73609e-08	1.07335e-06	8.84163
3936	ENSG00000136167	LCP1	lymphocyte cytosolic protein 1	2.02899	5.39527	17.357	6.74933e-08	1.07486e-06	8.82633
81605	ENSG00000167118	URM1	ubiquitin related modifier 1	-1.77785	5.55167	-17.3552	6.75509e-08	1.07517e-06	8.79396
5793	ENSG00000144724	PTPRG	protein tyrosine phosphatase receptor type G	4.39806	1.73155	17.3429	6.79451e-08	1.08084e-06	8.6945
132864	ENSG00000137449	CPEB2	cytoplasmic polyadenylation element binding protein 2	5.52504	1.62764	17.3404	6.80264e-08	1.08153e-06	8.41632
81847	ENSG00000118518	RNF146	ring finger protein 146	2.16931	4.91729	17.3265	6.84761e-08	1.08807e-06	8.85517
219736	ENSG00000165730	STOX1	storkhead box 1	3.02349	2.84932	17.3173	6.8777e-08	1.09224e-06	9.00245
8209	ENSG00000160221	GATD3	glutamine amidotransferase class 1 domain containing 3	-2.12882	5.06808	-17.313	6.89168e-08	1.09317e-06	8.8112
5336	ENSG00000197943	PLCG2	phospholipase C gamma 2	2.94122	2.82003	17.313	6.89172e-08	1.09317e-06	8.99993
9439	ENSG00000112282	MED23	mediator complex subunit 23	1.88942	4.93492	17.312	6.8951e-08	1.09317e-06	8.83773
23258	ENSG00000184014	DENND5A	DENN domain containing 5A	2.05516	5.80954	17.2976	6.94242e-08	1.10006e-06	8.76768
10048	ENSG00000010017	RANBP9	RAN binding protein 9	1.66406	5.07424	17.2949	6.95139e-08	1.10086e-06	8.81086
161835	ENSG00000150667	FSIP1	fibrous sheath interacting protein 1	3.3441	2.47774	17.2924	6.95968e-08	1.10108e-06	8.95436
400242	ENSG00000235706	DICER1-AS1	DICER1 antisense RNA 1	-2.42246	3.34051	-17.2921	6.96053e-08	1.10108e-06	8.96075
7128	ENSG00000118503	TNFAIP3	TNF alpha induced protein 3	3.92724	2.27941	17.2894	6.96957e-08	1.1019e-06	8.88725
9110	ENSG00000108389	MTMR4	myotubularin related protein 4	1.68837	5.6875	17.2824	6.99271e-08	1.10494e-06	8.76061
26005	ENSG00000168014	C2CD3	C2 domain containing 3 centriole elongation regulator	2.01611	4.89909	17.2809	6.99787e-08	1.10514e-06	8.82879
261729	ENSG00000157214	STEAP2	STEAP2 metalloreductase	-1.30397	7.97379	-17.2735	7.02261e-08	1.10843e-06	8.66187
5801	ENSG00000153233	PTPRR	protein tyrosine phosphatase receptor type R	-3.01242	2.39833	-17.2669	7.04475e-08	1.11131e-06	8.97536
729438	ENSG00000274070	CASTOR2	cytosolic arginine sensor for mTORC1 subunit 2	-1.83345	3.81431	-17.2597	7.06886e-08	1.11449e-06	8.89008
7532	ENSG00000170027	YWHAG	tyrosine 3-monooxygenase/tryptophan 5-monooxygenase activation protein gamma	1.4013	7.26661	17.2574	7.07675e-08	1.11511e-06	8.67385
25970	ENSG00000178188	SH2B1	SH2B adaptor protein 1	-1.66039	5.16754	-17.2551	7.08429e-08	1.11511e-06	8.76666
55795	ENSG00000126226	PCID2	PCI domain containing 2	1.71129	5.73234	17.255	7.08456e-08	1.11511e-06	8.7441
10927	ENSG00000106723	SPIN1	spindlin 1	1.38777	5.97451	17.2536	7.08942e-08	1.11526e-06	8.72402
387758	ENSG00000176971	FIBIN	fin bud initiation factor homolog	5.11532	2.06391	17.2449	7.11887e-08	1.11927e-06	8.66442
4927	ENSG00000108559	NUP88	nucleoporin 88	1.51566	6.6283	17.2409	7.13269e-08	1.12082e-06	8.68861
5438	ENSG00000105258	POLR2I	RNA polymerase II subunit I	-1.57811	6.01112	-17.2392	7.13827e-08	1.12108e-06	8.70706
54856	ENSG00000116580	GON4L	gon-4 like	1.77914	5.28502	17.2331	7.15928e-08	1.12321e-06	8.7654
10447	ENSG00000196937	FAM3C	FAM3 metabolism regulating signaling molecule C	1.53663	5.11145	17.2329	7.15973e-08	1.12321e-06	8.77327
22859	ENSG00000072071	ADGRL1	adhesion G protein-coupled receptor L1	-1.49104	7.36801	-17.2307	7.16728e-08	1.12377e-06	8.65292
2896	ENSG00000030582	GRN	granulin precursor	-1.86578	6.58195	-17.2285	7.17503e-08	1.12437e-06	8.67889
9354	ENSG00000110344	UBE4A	ubiquitination factor E4A	1.51291	6.2975	17.2263	7.18258e-08	1.12485e-06	8.69552
84640	ENSG00000170185	USP38	ubiquitin specific peptidase 38	2.05781	4.21412	17.2252	7.18605e-08	1.12485e-06	8.86756
658	ENSG00000138696	BMPR1B	bone morphogenetic protein receptor type 1B	3.79578	2.01917	17.2178	7.21155e-08	1.12822e-06	8.80955
81892	ENSG00000119705	SLIRP	SRA stem-loop interacting RNA binding protein	-1.73122	5.64333	-17.2028	7.26336e-08	1.1357e-06	8.70977
79086	ENSG00000214046	SMIM7	small integral membrane protein 7	-1.67802	5.90922	-17.1928	7.29826e-08	1.14053e-06	8.68925
10939	ENSG00000141385	AFG3L2	AFG3 like matrix AAA peptidase subunit 2	1.41441	6.16219	17.1912	7.30395e-08	1.14079e-06	8.68259
81786	ENSG00000146054	TRIM7	tripartite motif containing 7	-2.2302	3.18774	-17.1885	7.3135e-08	1.14165e-06	8.91661
5906	ENSG00000116473	RAP1A	RAP1A, member of RAS oncogene family	1.46893	5.3373	17.1855	7.32399e-08	1.14266e-06	8.7303
84248	ENSG00000122068	FYTTD1	forty-two-three domain containing 1	1.48952	5.68067	17.1797	7.34413e-08	1.14518e-06	8.70442
10155	ENSG00000130726	TRIM28	tripartite motif containing 28	-1.80273	8.74504	-17.1727	7.36876e-08	1.1483e-06	8.59924
151742	ENSG00000163590	PPM1L	protein phosphatase, Mg2+/Mn2+ dependent 1L	3.30628	2.98488	17.1718	7.37226e-08	1.1483e-06	8.93412
85441	ENSG00000130589	HELZ2	helicase with zinc finger 2	1.67194	6.07544	17.1689	7.38221e-08	1.14922e-06	8.67918
10220	ENSG00000135414	GDF11	growth differentiation factor 11	-2.10486	4.62422	-17.166	7.39259e-08	1.15021e-06	8.77318
5912	ENSG00000181467	RAP2B	RAP2B, member of RAS oncogene family	2.34628	4.4748	17.1648	7.39703e-08	1.15027e-06	8.82202
84808	ENSG00000187642	PERM1	PPARGC1 and ESRR induced regulator, muscle 1	-2.59256	2.96547	-17.1634	7.40178e-08	1.15038e-06	8.92351
10435	ENSG00000149798	CDC42EP2	CDC42 effector protein 2	-2.52027	3.34365	-17.154	7.43543e-08	1.15497e-06	8.89539
25759	ENSG00000129946	SHC2	SHC adaptor protein 2	1.94761	5.52632	17.1517	7.44363e-08	1.15561e-06	8.70983
100287015	ENSG00000246089	MCPH1-DT	MCPH1 divergent transcript	2.02137	4.16881	17.1489	7.45361e-08	1.15597e-06	8.83332
64921	ENSG00000127995	CASD1	CAS1 domain containing 1	2.02038	3.94113	17.1487	7.45404e-08	1.15597e-06	8.85374
23161	ENSG00000071189	SNX13	sorting nexin 13	1.82224	4.70431	17.1414	7.4803e-08	1.15932e-06	8.76991
9678	ENSG00000106443	PHF14	PHD finger protein 14	-1.59612	5.92005	-17.1404	7.48383e-08	1.15932e-06	8.66088
3417	ENSG00000138413	IDH1	isocitrate dehydrogenase (NADP(+)) 1	1.30367	8.0838	17.1354	7.50194e-08	1.16109e-06	8.59097
80758	ENSG00000131188	PRR7	proline rich 7, synaptic	-2.50867	5.28584	-17.135	7.50344e-08	1.16109e-06	8.71209
10382	ENSG00000104833	TUBB4A	tubulin beta 4A class IVa	-3.586	3.13204	-17.1323	7.51293e-08	1.1618e-06	8.91436
100129842	ENSG00000237440	ZNF737	zinc finger protein 737	2.39421	3.14505	17.1314	7.51618e-08	1.1618e-06	8.91065
64764	ENSG00000182158	CREB3L2	cAMP responsive element binding protein 3 like 2	1.58209	5.25802	17.1302	7.52055e-08	1.16184e-06	8.71029
10075	ENSG00000086758	HUWE1	HECT, UBA and WWE domain containing E3 ubiquitin protein ligase 1	1.71452	8.05597	17.1282	7.52793e-08	1.16235e-06	8.58968
51024	ENSG00000214253	FIS1	fission, mitochondrial 1	-1.63454	7.06927	-17.1245	7.54144e-08	1.16379e-06	8.60663
3981	ENSG00000174405	LIG4	DNA ligase 4	3.13811	3.67796	17.1233	7.54545e-08	1.16379e-06	8.89462
124220	ENSG00000162078	ZG16B	zymogen granule protein 16B	-1.5771	4.68466	-17.1128	7.58395e-08	1.16909e-06	8.72978
6653	ENSG00000137642	SORL1	sortilin related receptor 1	1.65824	5.10038	17.1083	7.60011e-08	1.17094e-06	8.71326
374291	ENSG00000115286	NDUFS7	NADH:ubiquinone oxidoreductase core subunit S7	-2.00106	6.66447	-17.103	7.61969e-08	1.1727e-06	8.61186
3656	ENSG00000134070	IRAK2	interleukin 1 receptor associated kinase 2	2.96621	2.51987	17.1029	7.61978e-08	1.1727e-06	8.88738
375757	ENSG00000175854	SWI5	SWI5 homologous recombination repair protein	-1.53536	5.6428	-17.0982	7.63707e-08	1.17473e-06	8.65369
56180	ENSG00000101928	MOSPD1	motile sperm domain containing 1	2.03805	4.14879	17.097	7.64157e-08	1.17478e-06	8.80858
5781	ENSG00000179295	PTPN11	protein tyrosine phosphatase non-receptor type 11	1.91124	6.50785	17.0944	7.65107e-08	1.17561e-06	8.62294
51645	ENSG00000137168	PPIL1	peptidylprolyl isomerase like 1	-1.95022	4.33945	-17.092	7.65997e-08	1.17619e-06	8.75802
79993	ENSG00000164181	ELOVL7	ELOVL fatty acid elongase 7	3.07676	5.00331	17.0911	7.66316e-08	1.17619e-06	8.76064
5364	ENSG00000164050	PLXNB1	plexin B1	-1.49868	5.91831	-17.0858	7.68293e-08	1.17859e-06	8.63183
25943	ENSG00000088854	DNAAF9	dynein axonemal assembly factor 9	2.11125	4.49881	17.0797	7.70534e-08	1.18139e-06	8.76787
64762	ENSG00000141441	GAREM1	GRB2 associated regulator of MAPK1 subtype 1	2.65771	3.09087	17.0743	7.72551e-08	1.18384e-06	8.88748
7716	ENSG00000136451	VEZF1	vascular endothelial zinc finger 1	1.38524	5.87164	17.0715	7.73611e-08	1.18455e-06	8.63547
1777	ENSG00000105612	DNASE2	deoxyribonuclease 2, lysosomal	-1.44564	5.7817	-17.0708	7.73857e-08	1.18455e-06	8.63081
6990	ENSG00000165169	DYNLT3	dynein light chain Tctex-type 3	1.92689	4.92588	17.0697	7.74266e-08	1.18455e-06	8.71585
10585	ENSG00000130714	POMT1	protein O-mannosyltransferase 1	-1.44632	5.38054	-17.0675	7.75101e-08	1.18519e-06	8.65308
4520	ENSG00000188786	MTF1	metal regulatory transcription factor 1	1.5576	4.85118	17.0596	7.78042e-08	1.18864e-06	8.70689
23195	ENSG00000112159	MDN1	midasin AAA ATPase 1	1.73887	5.24602	17.0582	7.78579e-08	1.18864e-06	8.67755
8192	ENSG00000125656	CLPP	caseinolytic mitochondrial matrix peptidase proteolytic subunit	-1.42804	6.77261	-17.0581	7.7861e-08	1.18864e-06	8.58043
9592	ENSG00000160888	IER2	immediate early response 2	-1.7933	5.82088	-17.0563	7.79297e-08	1.18905e-06	8.62455
64343	ENSG00000163512	AZI2	5-azacytidine induced 2	1.47857	5.57288	17.0488	7.82095e-08	1.19267e-06	8.64355
253832	ENSG00000180776	ZDHHC20	zinc finger DHHC-type palmitoyltransferase 20	2.07697	4.44892	17.045	7.83532e-08	1.19422e-06	8.7538
8727	ENSG00000119326	CTNNAL1	catenin alpha like 1	1.58532	5.52631	17.0422	7.84619e-08	1.19466e-06	8.64514
51764	ENSG00000127588	GNG13	G protein subunit gamma 13	-3.90108	1.60957	-17.0421	7.84657e-08	1.19466e-06	8.71967
23515	ENSG00000159256	MORC3	MORC family CW-type zinc finger 3	2.59965	4.43981	17.0394	7.85678e-08	1.19557e-06	8.77114
79053	ENSG00000159063	ALG8	ALG8 alpha-1,3-glucosyltransferase	-1.56259	4.61428	-17.0378	7.86279e-08	1.19584e-06	8.69697
51602	ENSG00000055044	NOP58	NOP58 ribonucleoprotein	-1.33509	6.32935	-17.0322	7.88389e-08	1.19841e-06	8.5834
85416	ENSG00000139800	ZIC5	Zic family member 5	3.99633	3.28126	17.0307	7.88968e-08	1.19865e-06	8.86803
1051	ENSG00000172216	CEBPB	CCAAT enhancer binding protein beta	1.61671	5.45301	17.0286	7.89754e-08	1.1992e-06	8.6442
1917	ENSG00000101210	EEF1A2	eukaryotic translation elongation factor 1 alpha 2	-1.93195	9.97077	-17.0271	7.90344e-08	1.19945e-06	8.51142
113730	ENSG00000130487	KLHDC7B	kelch domain containing 7B	2.44036	4.03856	17.0257	7.90872e-08	1.19945e-06	8.797
8636	ENSG00000176101	SSNA1	SS nuclear autoantigen 1	-1.47151	6.22422	-17.0249	7.91186e-08	1.19945e-06	8.58508
90333	ENSG00000204604	ZNF468	zinc finger protein 468	3.22215	4.01389	17.0159	7.94623e-08	1.20402e-06	8.82075
80178	ENSG00000162062	TEDC2	tubulin epsilon and delta complex 2	-2.96263	2.79232	-17.0038	7.99289e-08	1.21044e-06	8.85493
666	ENSG00000176720	BOK	BCL2 family apoptosis regulator BOK	-1.91897	4.83862	-16.9999	8.00799e-08	1.21208e-06	8.6652
9609	ENSG00000100228	RAB36	RAB36, member RAS oncogene family	-1.85097	3.93773	-16.9976	8.01676e-08	1.21276e-06	8.74629
54806	ENSG00000135541	AHI1	Abelson helper integration site 1	1.55243	5.45733	16.9937	8.03216e-08	1.21445e-06	8.62415
3835	ENSG00000079616	KIF22	kinesin family member 22	-1.82745	5.63238	-16.9915	8.04045e-08	1.21505e-06	8.60213
1298	ENSG00000049089	COL9A2	collagen type IX alpha 2 chain	-4.30529	1.80036	-16.9876	8.0558e-08	1.21673e-06	8.70202
114781	ENSG00000183826	BTBD9	BTB domain containing 9	1.68242	4.98967	16.9851	8.06555e-08	1.21755e-06	8.65955
10410	ENSG00000142089	IFITM3	interferon induced transmembrane protein 3	-1.32031	6.42149	-16.983	8.07389e-08	1.21816e-06	8.55374
6175	ENSG00000089157	RPLP0	ribosomal protein lateral stalk subunit P0	-2.17268	12.0746	-16.9747	8.10633e-08	1.22241e-06	8.47788
440957	ENSG00000168273	UQCC5	ubiquinol-cytochrome c reductase complex assembly factor 5	-1.93465	4.99455	-16.9714	8.11918e-08	1.22311e-06	8.63779
23506	ENSG00000112624	BICRAL	BICRA like chromatin remodeling complex associated protein	2.32274	4.15071	16.9705	8.12271e-08	1.22311e-06	8.75401
9924	ENSG00000135473	PAN2	poly(A) specific ribonuclease subunit PAN2	1.63679	7.0339	16.9702	8.12392e-08	1.22311e-06	8.5339
23446	ENSG00000070214	SLC44A1	solute carrier family 44 member 1	-1.62092	5.50205	-16.9676	8.13408e-08	1.22399e-06	8.59537
57589	ENSG00000107036	RIC1	RIC1 homolog, RAB6A GEF complex partner 1	2.21815	4.49144	16.9584	8.1706e-08	1.22881e-06	8.71025
6635	ENSG00000182004	SNRPE	small nuclear ribonucleoprotein polypeptide E	-2.33719	5.88012	-16.9573	8.17475e-08	1.22881e-06	8.57698
8731	ENSG00000101654	RNMT	RNA guanine-7 methyltransferase	1.52789	5.43112	16.9443	8.22663e-08	1.23595e-06	8.59985
80000	ENSG00000141449	GREB1L	GREB1 like retinoic acid receptor coactivator	2.50124	3.1496	16.9425	8.2336e-08	1.23635e-06	8.8194
100505761	ENSG00000269609	C10orf95-AS1	C10orf95 antisense RNA 1	-2.59466	4.24453	-16.9371	8.25542e-08	1.23789e-06	8.70668
9586	ENSG00000146592	CREB5	cAMP responsive element binding protein 5	5.44894	1.57811	16.9369	8.25602e-08	1.23789e-06	8.27906
10105	ENSG00000108179	PPIF	peptidylprolyl isomerase F	-1.37364	6.10271	-16.9366	8.25734e-08	1.23789e-06	8.54386
79084	ENSG00000116455	WDR77	WD repeat domain 77	-1.75784	4.7438	-16.9356	8.26133e-08	1.23789e-06	8.63682
23085	ENSG00000082805	ERC1	ELKS/RAB6-interacting/CAST family member 1	2.10355	5.25414	16.9337	8.26917e-08	1.23841e-06	8.62199
23786	ENSG00000099968	BCL2L13	BCL2 like 13	2.25469	6.73075	16.9294	8.28614e-08	1.2403e-06	8.53192
161176	ENSG00000176438	SYNE3	spectrin repeat containing nuclear envelope family member 3	4.67952	2.48062	16.9249	8.30459e-08	1.24184e-06	8.6929
9828	ENSG00000110237	ARHGEF17	Rho guanine nucleotide exchange factor 17	-1.59752	4.52695	-16.9247	8.30514e-08	1.24184e-06	8.64661
26092	ENSG00000143337	TOR1AIP1	torsin 1A interacting protein 1	2.70688	5.53728	16.9114	8.35909e-08	1.24924e-06	8.60535
9711	ENSG00000145016	RUBCN	rubicon autophagy regulator	1.582	5.3774	16.9039	8.38968e-08	1.25316e-06	8.58402
3291	ENSG00000176387	HSD11B2	hydroxysteroid 11-beta dehydrogenase 2	-1.52926	5.39147	-16.8962	8.42129e-08	1.25722e-06	8.56387
205327	ENSG00000178074	C2orf69	chromosome 2 open reading frame 69	1.93473	3.78078	16.8944	8.42828e-08	1.2576e-06	8.73747
1121	ENSG00000188419	CHM	CHM Rab escort protein	2.29354	3.904	16.8927	8.43533e-08	1.25799e-06	8.73701
80124	ENSG00000175073	VCPIP1	valosin containing protein interacting protein 1	2.77834	3.95508	16.886	8.46286e-08	1.26143e-06	8.74748
79665	ENSG00000108406	DHX40	DEAH-box helicase 40	1.56594	5.85933	16.8823	8.47809e-08	1.26242e-06	8.54031
23731	ENSG00000106771	TMEM245	transmembrane protein 245	1.57799	5.01422	16.8823	8.47835e-08	1.26242e-06	8.60151
143098	ENSG00000150054	MPP7	MAGUK p55 scaffold protein 7	2.35275	3.49989	16.8726	8.51836e-08	1.26694e-06	8.76159
10098	ENSG00000168785	TSPAN5	tetraspanin 5	4.09809	3.04334	16.8724	8.51904e-08	1.26694e-06	8.77967
57333	ENSG00000142552	RCN3	reticulocalbin 3	-4.59139	2.73801	-16.8717	8.52209e-08	1.26694e-06	8.77018
54149	ENSG00000154642	C21orf91	chromosome 21 open reading frame 91	2.2903	3.42808	16.8705	8.52693e-08	1.26699e-06	8.76408
11313	ENSG00000011009	LYPLA2	lysophospholipase 2	-1.96951	5.09022	-16.8637	8.55551e-08	1.27057e-06	8.57474
100506930	ENSG00000232677	LINC00665	long intergenic non-protein coding RNA 665	-1.53402	5.03673	-16.8622	8.56166e-08	1.27082e-06	8.57121
122809	ENSG00000180008	SOCS4	suppressor of cytokine signaling 4	1.65268	4.90687	16.8598	8.57165e-08	1.27164e-06	8.60133
1537	ENSG00000179091	CYC1	cytochrome c1	-1.2861	7.36076	-16.8511	8.60825e-08	1.2764e-06	8.45373
5495	ENSG00000138032	PPM1B	protein phosphatase, Mg2+/Mn2+ dependent 1B	1.71957	4.25364	16.8496	8.61448e-08	1.27666e-06	8.66127
7296	ENSG00000198431	TXNRD1	thioredoxin reductase 1	2.04566	7.51258	16.8454	8.6319e-08	1.27858e-06	8.45696
4946	ENSG00000104904	OAZ1	ornithine decarboxylase antizyme 1	-1.52481	10.1178	-16.844	8.63796e-08	1.2788e-06	8.41327
55624	ENSG00000085998	POMGNT1	protein O-linked mannose N-acetylglucosaminyltransferase 1 (beta 1,2-)	-1.47568	6.58978	-16.8336	8.68199e-08	1.28452e-06	8.46947
64848	ENSG00000047188	YTHDC2	YTH N6-methyladenosine RNA binding protein C2	1.80006	4.90876	16.8327	8.68562e-08	1.28452e-06	8.59088
283234	ENSG00000168071	CCDC88B	coiled-coil domain containing 88B	-2.74917	3.84839	-16.8281	8.70518e-08	1.28674e-06	8.69517
54543	ENSG00000196683	TOMM7	translocase of outer mitochondrial membrane 7	-1.95014	7.50596	-16.8265	8.71199e-08	1.28708e-06	8.44013
64236	ENSG00000120913	PDLIM2	PDZ and LIM domain 2	-1.61035	4.63664	-16.8248	8.71931e-08	1.28749e-06	8.58551
23608	ENSG00000133606	MKRN1	makorin ring finger protein 1	1.28598	6.71815	16.8092	8.78607e-08	1.29625e-06	8.45718
5290	ENSG00000121879	PIK3CA	phosphatidylinositol-4,5-bisphosphate 3-kinase catalytic subunit alpha	2.4237	3.58541	16.8088	8.78775e-08	1.29625e-06	8.72524
11133	ENSG00000118162	KPTN	kaptin, actin binding protein	-1.74439	4.17562	-16.8059	8.80007e-08	1.2969e-06	8.62154
4077	ENSG00000188554	NBR1	NBR1 autophagy cargo receptor	1.74506	7.12945	16.8056	8.80129e-08	1.2969e-06	8.445
5092	ENSG00000166228	PCBD1	pterin-4 alpha-carbinolamine dehydratase 1	-1.58742	7.08924	-16.7999	8.82606e-08	1.29988e-06	8.43531
55607	ENSG00000158528	PPP1R9A	protein phosphatase 1 regulatory subunit 9A	2.74128	3.12668	16.7929	8.8565e-08	1.30368e-06	8.75031
10195	ENSG00000214160	ALG3	ALG3 alpha-1,3- mannosyltransferase	-1.8982	6.07834	-16.7796	8.91436e-08	1.31152e-06	8.46704
9245	ENSG00000140297	GCNT3	glucosaminyl (N-acetyl) transferase 3, mucin type	4.3483	2.3174	16.7777	8.92261e-08	1.31205e-06	8.62517
171391	ENSG00000255284	GATD1-DT	GATD1 divergent transcript	-2.3295	3.20642	-16.7728	8.94378e-08	1.31449e-06	8.70945
54880	ENSG00000183337	BCOR	BCL6 corepressor	2.75089	5.52986	16.7605	8.99808e-08	1.32164e-06	8.52839
8031	ENSG00000266412	NCOA4	nuclear receptor coactivator 4	1.60011	6.96044	16.759	9.00481e-08	1.32164e-06	8.42467
10461	ENSG00000153208	MERTK	MER proto-oncogene, tyrosine kinase	2.2802	3.83679	16.7583	9.00752e-08	1.32164e-06	8.67397
79001	ENSG00000167397	VKORC1	vitamin K epoxide reductase complex subunit 1	-1.9441	5.77493	-16.7575	9.01104e-08	1.32164e-06	8.47233
1810	ENSG00000117505	DR1	down-regulator of transcription 1	2.05967	5.351	16.746	9.06206e-08	1.32775e-06	8.51453
9696	ENSG00000058453	CROCC	ciliary rootlet coiled-coil, rootletin	-1.58705	4.40838	-16.746	9.06212e-08	1.32775e-06	8.56441
26018	ENSG00000144749	LRIG1	leucine rich repeats and immunoglobulin like domains 1	1.65278	5.07717	16.7444	9.06931e-08	1.32812e-06	8.52553
4534	ENSG00000171100	MTM1	myotubularin 1	3.28652	2.80165	16.7422	9.07913e-08	1.32873e-06	8.72562
55626	ENSG00000110497	AMBRA1	autophagy and beclin 1 regulator 1	1.47887	5.51917	16.7414	9.08282e-08	1.32873e-06	8.48631
23380	ENSG00000266028	SRGAP2	SLIT-ROBO Rho GTPase activating protein 2	1.54787	5.59924	16.7397	9.09042e-08	1.32916e-06	8.48119
90268	ENSG00000154124	OTULIN	OTU deubiquitinase with linear linkage specificity	1.74296	4.62572	16.7345	9.11367e-08	1.33187e-06	8.56538
57224	ENSG00000135540	NHSL1	NHS like 1	2.288	3.982	16.7331	9.11994e-08	1.3321e-06	8.64754
8085	ENSG00000167548	KMT2D	lysine methyltransferase 2D	2.21948	6.62885	16.7272	9.14637e-08	1.33528e-06	8.42914
29028	ENSG00000156802	ATAD2	ATPase family AAA domain containing 2	1.73155	4.48442	16.7239	9.1611e-08	1.3363e-06	8.5729
6720	ENSG00000072310	SREBF1	sterol regulatory element binding transcription factor 1	-1.73654	7.78206	-16.7235	9.16281e-08	1.3363e-06	8.37821
650623	NA	BEND3P3	BEN domain containing 3 pseudogene 3	3.32606	2.41685	16.7191	9.18271e-08	1.33852e-06	8.68843
157378	ENSG00000164983	TMEM65	transmembrane protein 65	1.99064	4.50336	16.716	9.19659e-08	1.33945e-06	8.57549
4087	ENSG00000175387	SMAD2	SMAD family member 2	1.49457	6.01637	16.7156	9.19856e-08	1.33945e-06	8.44231
66005	ENSG00000177830	CHID1	chitinase domain containing 1	-2.01001	6.4428	-16.7139	9.206e-08	1.33985e-06	8.41644
23033	ENSG00000083097	DOP1A	DOP1 leucine zipper like protein A	3.35719	3.87164	16.7127	9.21165e-08	1.33998e-06	8.68299
8416	ENSG00000143412	ANXA9	annexin A9	-2.03958	3.56767	-16.7069	9.23779e-08	1.3431e-06	8.63854
6634	ENSG00000100028	SNRPD3	small nuclear ribonucleoprotein D3 polypeptide	-1.47675	6.84418	-16.7028	9.25672e-08	1.34516e-06	8.39084
6041	ENSG00000135828	RNASEL	ribonuclease L	2.64022	3.03098	16.6945	9.29434e-08	1.34994e-06	8.70285
9575	ENSG00000134852	CLOCK	clock circadian regulator	1.48942	5.29493	16.6921	9.30527e-08	1.3506e-06	8.47666
201163	ENSG00000154803	FLCN	folliculin	2.57564	6.26851	16.6914	9.30843e-08	1.3506e-06	8.43504
22874	ENSG00000143850	PLEKHA6	pleckstrin homology domain containing A6	1.47497	5.37649	16.6848	9.33881e-08	1.35432e-06	8.46639
29957	ENSG00000085491	SLC25A24	solute carrier family 25 member 24	2.6202	3.55168	16.6827	9.34838e-08	1.35447e-06	8.6693
55132	ENSG00000138709	LARP1B	La ribonucleoprotein 1B	1.58467	5.03667	16.6825	9.34939e-08	1.35447e-06	8.49479
1183	ENSG00000073464	CLCN4	chloride voltage-gated channel 4	1.9528	3.83593	16.6741	9.38835e-08	1.35942e-06	8.62054
170463	ENSG00000130511	SSBP4	single stranded DNA binding protein 4	-2.17024	4.978	-16.6723	9.39654e-08	1.35991e-06	8.48773
23478	ENSG00000140612	SEC11A	SEC11 homolog A, signal peptidase complex subunit	-1.47376	6.42586	-16.6679	9.41677e-08	1.36215e-06	8.38802
4054	ENSG00000168056	LTBP3	latent transforming growth factor beta binding protein 3	-2.16141	7.43068	-16.663	9.43966e-08	1.36476e-06	8.3564
51562	ENSG00000151332	MBIP	MAP3K12 binding inhibitory protein 1	1.84227	3.99921	16.6611	9.44873e-08	1.36538e-06	8.59341
1047	ENSG00000153132	CLGN	calmegin	1.38842	6.87325	16.6569	9.4681e-08	1.36691e-06	8.37139
90809	ENSG00000165782	PIP4P1	phosphatidylinositol-4,5-bisphosphate 4-phosphatase 1	1.4327	5.61033	16.6567	9.46897e-08	1.36691e-06	8.43429
8079	ENSG00000089693	MLF2	myeloid leukemia factor 2	-1.3132	7.62013	-16.6434	9.53119e-08	1.37519e-06	8.33731
64221	ENSG00000154134	ROBO3	roundabout guidance receptor 3	-1.54143	5.43666	-16.6402	9.54653e-08	1.37671e-06	8.42607
57418	ENSG00000065268	WDR18	WD repeat domain 18	-2.09676	6.57509	-16.6368	9.56234e-08	1.37829e-06	8.37066
391356	ENSG00000184924	PTRHD1	peptidyl-tRNA hydrolase domain containing 1	-2.007	4.6578	-16.6311	9.58965e-08	1.38152e-06	8.49041
5204	ENSG00000123349	PFDN5	prefoldin subunit 5	-2.20314	7.64856	-16.6223	9.63098e-08	1.38634e-06	8.32932
55596	ENSG00000033030	ZCCHC8	zinc finger CCHC-type containing 8	1.61048	5.43041	16.6218	9.63382e-08	1.38634e-06	8.43199
8508	ENSG00000184117	NIPSNAP1	nipsnap homolog 1	-1.248	7.0905	-16.6209	9.63772e-08	1.38634e-06	8.33833
80307	ENSG00000088340	FER1L4	fer-1 like family member 4 (pseudogene)	-1.90893	3.81768	-16.6181	9.65132e-08	1.38696e-06	8.5636
10084	ENSG00000102103	PQBP1	polyglutamine binding protein 1	-1.65771	6.91955	-16.618	9.65184e-08	1.38696e-06	8.34411
90871	ENSG00000137038	DMAC1	distal membrane arm assembly component 1	-2.0542	5.94131	-16.6119	9.68086e-08	1.38981e-06	8.387
5794	ENSG00000080031	PTPRH	protein tyrosine phosphatase receptor type H	3.7421	2.08475	16.6118	9.68141e-08	1.38981e-06	8.56594
2820	ENSG00000115159	GPD2	glycerol-3-phosphate dehydrogenase 2	2.01794	3.97731	16.6106	9.68726e-08	1.38994e-06	8.57632
54932	ENSG00000187609	EXD3	exonuclease 3'-5' domain containing 3	-1.9274	4.04052	-16.6019	9.72906e-08	1.39524e-06	8.53262
55762	ENSG00000167562	ZNF701	zinc finger protein 701	2.25745	3.33685	16.5996	9.74004e-08	1.39611e-06	8.63302
26049	ENSG00000198780	FAM169A	family with sequence similarity 169 member A	2.6404	4.32536	16.5977	9.74889e-08	1.39652e-06	8.55964
115825	ENSG00000139668	WDFY2	WD repeat and FYVE domain containing 2	1.76636	4.14353	16.5969	9.75282e-08	1.39652e-06	8.54305
58473	ENSG00000021300	PLEKHB1	pleckstrin homology domain containing B1	-1.37193	8.13367	-16.5959	9.75766e-08	1.39652e-06	8.30231
5151	ENSG00000073417	PDE8A	phosphodiesterase 8A	1.91596	4.83437	16.5938	9.76799e-08	1.39689e-06	8.47579
84266	ENSG00000125652	ALKBH7	alkB homolog 7	-2.18747	6.73244	-16.5933	9.7701e-08	1.39689e-06	8.34202
6938	ENSG00000140262	TCF12	transcription factor 12	2.7803	5.13009	16.5896	9.78809e-08	1.39876e-06	8.47577
286257	ENSG00000148362	PAXX	PAXX non-homologous end joining factor	-2.47557	5.55602	-16.5854	9.80865e-08	1.40099e-06	8.40371
113246	ENSG00000111678	C12orf57	chromosome 12 open reading frame 57	-1.8314	7.87957	-16.5842	9.81447e-08	1.40112e-06	8.30196
539	ENSG00000241837	ATP5PO	ATP synthase peripheral stalk subunit OSCP	-2.01392	7.01138	-16.5732	9.86791e-08	1.40804e-06	8.31967
7037	ENSG00000072274	TFRC	transferrin receptor	1.93073	6.78262	16.5687	9.89007e-08	1.41049e-06	8.33398
28992	ENSG00000133315	MACROD1	mono-ADP ribosylhydrolase 1	-2.25311	5.87052	-16.5657	9.9049e-08	1.4119e-06	8.36927
6013	ENSG00000107018	RLN1	relaxin 1	-3.24321	1.89981	-16.5586	9.93987e-08	1.41617e-06	8.59812
8535	ENSG00000141582	CBX4	chromobox 4	2.1094	8.09357	16.5572	9.94661e-08	1.41642e-06	8.28883
114569	ENSG00000147676	MAL2	mal, T cell differentiation protein 2	1.33539	7.33729	16.5557	9.95385e-08	1.41651e-06	8.30155
5226	ENSG00000142657	PGD	phosphogluconate dehydrogenase	-1.24461	7.28144	-16.5541	9.96176e-08	1.41651e-06	8.29719
101927305	ENSG00000251676	SNHG27	small nucleolar RNA host gene 27	-3.03602	2.38083	-16.553	9.96711e-08	1.41651e-06	8.63456
6667	ENSG00000185591	SP1	Sp1 transcription factor	2.17726	5.9628	16.553	9.96717e-08	1.41651e-06	8.3711
51542	ENSG00000143952	VPS54	VPS54 subunit of GARP complex	1.94555	5.43326	16.5509	9.97794e-08	1.41733e-06	8.40161
[truncated: 26,396 more rows]

## Sheet: Sheet2
ENTREZID	ENSEMBL	SYMBOL	GENENAME	logFC	AveExpr	t	P.Value	adj.P.Val	B
467	ENSG00000162772	ATF3	activating transcription factor 3	5.69151	8.07296	66.4737	8.9326e-13	2.53641e-08	19.6081
148789	ENSG00000162885	B3GALNT2	beta-1,3-N-acetylgalactosaminyltransferase 2	4.48776	7.16947	51.2181	8.02109e-12	4.60425e-08	17.7934
1026	ENSG00000124762	CDKN1A/p21	cyclin dependent kinase inhibitor 1A	4.32854	8.43528	50.7709	8.63523e-12	4.60425e-08	17.8089
80315	ENSG00000113742	CPEB4	cytoplasmic polyadenylation element binding protein 4	5.13973	5.80691	50.1964	9.50287e-12	4.60425e-08	17.3149
22837	ENSG00000082438	COBLL1	cordon-bleu WH2 repeat protein like 1	5.37235	5.77991	49.292	1.10733e-11	4.60425e-08	17.1446
79648	ENSG00000147316	MCPH1	microcephalin 1	4.45557	5.99067	47.2974	1.56732e-11	5.2473e-08	17.054
4093	ENSG00000120693	SMAD9	SMAD family member 9	5.99728	5.08376	45.2	2.29504e-11	5.2473e-08	16.1236
115196	ENSG00000172006	ZNF554	zinc finger protein 554	5.04258	5.64328	45.1389	2.32129e-11	5.2473e-08	16.5675
10457	ENSG00000136235	GPNMB	glycoprotein nmb	5.34128	5.3838	45.0155	2.37531e-11	5.2473e-08	16.4095
162394	ENSG00000166750	SLFN5	schlafen family member 5	5.18512	5.70278	44.5603	2.58715e-11	5.2473e-08	16.4802
1647	ENSG00000116717	GADD45A	growth arrest and DNA damage inducible alpha	3.83945	6.36732	44.1598	2.79116e-11	5.28366e-08	16.6494
4189	ENSG00000128590	DNAJB9	DnaJ heat shock protein family (Hsp40) member B9	4.04689	5.78161	43.2939	3.29661e-11	5.50631e-08	16.4159
1130	ENSG00000143669	LYST	lysosomal trafficking regulator	5.59925	5.51385	42.2735	4.02817e-11	6.19493e-08	15.9896
27125	ENSG00000072364	AFF4	ALF transcription elongation factor 4	3.67847	7.2162	41.6673	4.54789e-11	6.19493e-08	16.2526
10973	ENSG00000112249	ASCC3	activating signal cointegrator 1 complex subunit 3	3.83387	6.02519	41.6342	4.57841e-11	6.19493e-08	16.1706
56907	ENSG00000134278	SPIRE1	spire type actin nucleation factor 1	3.77754	6.13288	40.8103	5.4154e-11	6.19493e-08	16.0306
80351	ENSG00000107854	TNKS2	tankyrase 2	3.76888	5.84199	40.7756	5.45425e-11	6.19493e-08	15.9951
64782	ENSG00000181026	AEN	apoptosis enhancing nuclease	3.37362	7.18129	39.8711	6.58501e-11	6.92524e-08	15.9043
4549	NA	RNR1	s-rRNA	2.86948	13.8813	38.9418	8.02709e-11	7.1667e-08	15.7347
57568	ENSG00000116991	SIPA1L2	signal induced proliferation associated 1 like 2	4.66285	4.80159	38.9004	8.09911e-11	7.1667e-08	15.338
8863	ENSG00000049246	PER3	period circadian regulator 3	3.96159	5.60834	38.6767	8.50085e-11	7.1667e-08	15.5556
2081	ENSG00000178607	ERN1	endoplasmic reticulum to nucleus signaling 1	7.04531	4.31168	38.4735	8.88517e-11	7.1667e-08	14.2748
8507	ENSG00000171617	ENC1	ectodermal-neural cortex 1	3.18583	6.54878	38.3553	9.11781e-11	7.1667e-08	15.5793
54676	ENSG00000172432	GTPBP2	GTP binding protein 2	3.11551	7.7413	38.2947	9.23954e-11	7.1667e-08	15.5877
2258	ENSG00000129682	FGF13	fibroblast growth factor 13	5.56671	4.39976	38.0881	9.66872e-11	7.1667e-08	14.8153
10529	ENSG00000078114	NEBL	nebulette	3.39978	6.56638	38.0288	9.79606e-11	7.1667e-08	15.5085
138639	ENSG00000158079	PTPDC1	protein tyrosine phosphatase domain containing 1	3.73348	5.75418	38.0258	9.80265e-11	7.1667e-08	15.4534
26136	ENSG00000135269	TES	testin LIM domain protein	3.3728	6.5127	38.007	9.84332e-11	7.1667e-08	15.5025
23064	ENSG00000107290	SETX	senataxin	3.48331	6.70548	37.7955	1.03155e-10	7.32271e-08	15.4622
9975	ENSG00000174738	NR1D2	nuclear receptor subfamily 1 group D member 2	3.81262	6.59026	37.6012	1.07714e-10	7.45987e-08	15.4127
80853	ENSG00000006459	KDM7A	lysine demethylase 7A	4.75678	4.75638	37.0481	1.21978e-10	7.90055e-08	14.9703
55326	ENSG00000155189	AGPAT5	1-acylglycerol-3-phosphate O-acyltransferase 5	3.35839	6.02602	37.032	1.22425e-10	7.90055e-08	15.2756
3433	ENSG00000119922	IFIT2	interferon induced protein with tetratricopeptide repeats 2	7.02901	4.36428	36.7799	1.29648e-10	8.00292e-08	14.109
6840	ENSG00000197321	SVIL	supervillin	3.92669	5.5074	36.4107	1.41098e-10	8.52441e-08	15.0837
1649	ENSG00000175197	DDIT3	DNA damage inducible transcript 3	2.88532	8.60924	36.1632	1.49408e-10	8.65804e-08	15.1182
9748	ENSG00000065613	SLK	STE20 like kinase	3.51241	6.4085	36.0453	1.53556e-10	8.72044e-08	15.0711
64864	ENSG00000181827	RFX7	regulatory factor X7	3.80711	5.2859	35.7932	1.62871e-10	8.73854e-08	14.9321
10846	ENSG00000112541	PDE10A	phosphodiesterase 10A	3.71909	5.54401	35.6038	1.70283e-10	8.80717e-08	14.9226
8974	ENSG00000072682	P4HA2	prolyl 4-hydroxylase subunit alpha 2	3.3167	6.22742	35.39	1.79104e-10	8.80717e-08	14.9197
91748	ENSG00000156030	MIDEAS	mitotic deacetylase associated SANT domain protein	4.4934	5.92096	35.3526	1.807e-10	8.80717e-08	14.8695
116987	ENSG00000157985	AGAP1	ArfGAP with GTPase domain, ankyrin repeat and PH domain 1	3.08485	5.98971	35.29	1.83404e-10	8.80717e-08	14.8926
9119	ENSG00000170454	KRT75	keratin 75	5.82836	4.15758	35.2398	1.85608e-10	8.80717e-08	14.1209
6782	ENSG00000155304	HSPA13	heat shock protein family A (Hsp70) member 13	3.52384	5.24409	34.9598	1.9845e-10	8.80717e-08	14.7588
1795	ENSG00000088538	DOCK3	dedicator of cytokinesis 3	4.15692	5.21351	34.95	1.98917e-10	8.80717e-08	14.7177
3099	ENSG00000159399	HK2	hexokinase 2	2.9011	6.42145	34.8879	2.01906e-10	8.80717e-08	14.8105
10564	ENSG00000124198	ARFGEF2	ADP ribosylation factor guanine nucleotide exchange factor 2	3.55764	5.7734	34.8176	2.05349e-10	8.80717e-08	14.767
6809	ENSG00000166900	STX3	syntaxin 3	2.8632	6.84908	34.8124	2.05606e-10	8.80717e-08	14.7969
64778	ENSG00000075420	FNDC3B	fibronectin type III domain containing 3B	3.48701	5.42466	34.8009	2.06181e-10	8.80717e-08	14.7416
6867	ENSG00000147526	TACC1	transforming acidic coiled-coil containing protein 1	2.95583	7.05927	34.7433	2.09061e-10	8.80717e-08	14.7814
4783	ENSG00000165030	NFIL3	nuclear factor, interleukin 3 regulated	3.21772	5.48955	34.581	2.17432e-10	8.82339e-08	14.7045
54800	ENSG00000114796	KLHL24	kelch like family member 24	3.407	5.21287	34.4625	2.23784e-10	8.82339e-08	14.6496
65059	ENSG00000173166	RAPH1	Ras association (RalGDS/AF-6) and pleckstrin homology domains 1	3.7369	5.27685	34.4561	2.24131e-10	8.82339e-08	14.6404
23303	ENSG00000197892	KIF13B	kinesin family member 13B	3.42418	5.76289	34.3627	2.29289e-10	8.82339e-08	14.6636
116442	ENSG00000155961	RAB39B	RAB39B, member RAS oncogene family	3.40194	5.65979	34.351	2.29946e-10	8.82339e-08	14.6566
9857	ENSG00000135837	CEP350	centrosomal protein 350	3.4823	5.55592	34.1433	2.41939e-10	9.1598e-08	14.6002
54887	ENSG00000065060	BLTP3A	bridge-like lipid transfer protein family member 3A	3.26389	5.69087	33.9585	2.53199e-10	9.45032e-08	14.5686
3309	ENSG00000044574	HSPA5	heat shock protein family A (Hsp70) member 5	2.57953	10.2977	33.9002	2.56878e-10	9.45032e-08	14.5725
54464	ENSG00000114127	XRN1	5'-3' exoribonuclease 1	3.39821	5.07783	33.6591	2.72714e-10	9.80217e-08	14.4525
49854	ENSG00000173276	ZBTB21	zinc finger and BTB domain containing 21	2.89187	5.73401	33.4085	2.90341e-10	1.00171e-07	14.4429
6049	ENSG00000127870	RNF6	ring finger protein 6	3.00558	5.66091	33.2879	2.99271e-10	1.00171e-07	14.41
1843	ENSG00000120129	DUSP1	dual specificity phosphatase 1	2.87254	5.76549	33.2237	3.04153e-10	1.00171e-07	14.3987
4846	ENSG00000164867	NOS3	nitric oxide synthase 3	6.06682	4.62682	33.144	3.1034e-10	1.00171e-07	13.9163
9695	ENSG00000134109	EDEM1	ER degradation enhancing alpha-mannosidase like protein 1	2.80309	6.08677	33.0906	3.14557e-10	1.00171e-07	14.3716
23347	ENSG00000101596	SMCHD1	structural maintenance of chromosomes flexible hinge domain containing 1	3.04017	6.21494	33.0539	3.175e-10	1.00171e-07	14.3628
23389	ENSG00000123066	MED13L	mediator complex subunit 13L	4.02172	5.56382	32.9891	3.2276e-10	1.00712e-07	14.3117
96459	ENSG00000217128	FNIP1	folliculin interacting protein 1	3.45984	5.61237	32.9311	3.27553e-10	1.01097e-07	14.3134
3726	ENSG00000171223	JUNB	JunB proto-oncogene, AP-1 transcription factor subunit	2.75484	6.20477	32.8593	3.33607e-10	1.01174e-07	14.3148
143	ENSG00000102699	PARP4	poly(ADP-ribose) polymerase family member 4	3.15098	5.97805	32.6855	3.48764e-10	1.03158e-07	14.2667
3708	ENSG00000150995	ITPR1	inositol 1,4,5-trisphosphate receptor type 1	4.0132	4.87611	32.5581	3.60358e-10	1.05488e-07	14.1373
10802	ENSG00000113615	SEC24A	SEC24 homolog A, COPII coat complex component	3.42436	5.05375	32.4231	3.73129e-10	1.08112e-07	14.1549
9644	ENSG00000107957	SH3PXD2A	SH3 and PX domains 2A	5.52723	4.17652	32.3115	3.84064e-10	1.08723e-07	13.6747
221037	ENSG00000171988	JMJD1C	jumonji domain containing 1C	3.65209	6.11177	32.2848	3.86723e-10	1.08723e-07	14.1641
22862	ENSG00000102531	FNDC3A	fibronectin type III domain containing 3A	2.89994	5.48575	32.137	4.0188e-10	1.09979e-07	14.1197
8795	ENSG00000120889	TNFRSF10B	TNF receptor superfamily member 10b	2.60368	7.37891	32.117	4.03985e-10	1.09979e-07	14.122
9821	ENSG00000023287	RB1CC1	RB1 inducible coiled-coil 1	2.69225	7.0797	32.0819	4.07702e-10	1.09979e-07	14.1143
116496	ENSG00000135842	NIBAN1	niban apoptosis regulator 1	3.15275	5.65915	32.0221	4.14119e-10	1.09979e-07	14.0923
55034	ENSG00000075643	MOCOS	molybdenum cofactor sulfurase	2.79193	6.3452	31.9837	4.18304e-10	1.09979e-07	14.0905
1657	ENSG00000172869	DMXL1	Dmx like 1	3.20417	6.05158	31.9075	4.26751e-10	1.10871e-07	14.0687
153222	ENSG00000164463	CREBRF	CREB3 regulatory factor	3.86836	5.05848	31.883	4.29504e-10	1.10871e-07	14.0053
8682	ENSG00000162734	PEA15	proliferation and apoptosis adaptor protein 15	2.44392	7.76108	31.754	4.44328e-10	1.1155e-07	14.0231
55281	ENSG00000146859	TMEM140	transmembrane protein 140	3.05883	5.48868	31.7516	4.44612e-10	1.1155e-07	14.0193
3162	ENSG00000100292	HMOX1	heme oxygenase 1	2.66603	6.09459	31.7241	4.47851e-10	1.1155e-07	14.0222
26130	ENSG00000165219	GAPVD1	GTPase activating protein and VPS9 domains 1	2.71297	6.07044	31.6498	4.5673e-10	1.12392e-07	14.0026
53905	ENSG00000137857	DUOX1	dual oxidase 1	4.83385	4.30106	31.5973	4.63128e-10	1.12392e-07	13.7017
23527	ENSG00000114331	ACAP2	ArfGAP with coiled-coil, ankyrin repeat and PH domains 2	3.07231	5.46823	31.5348	4.70871e-10	1.12392e-07	13.9628
85379	ENSG00000197077	KIAA1671	KIAA1671	2.61802	6.39006	31.4478	4.81889e-10	1.12392e-07	13.9488
2673	ENSG00000198380	GFPT1	glutamine--fructose-6-phosphate transaminase 1	2.87672	6.8787	31.4012	4.87915e-10	1.12392e-07	13.9346
55681	ENSG00000136021	SCYL2	SCY1 like pseudokinase 2	2.8418	5.93862	31.3635	4.92849e-10	1.12392e-07	13.9262
84166	ENSG00000140853	NLRC5	NLR family CARD domain containing 5	4.91315	4.38303	31.318	4.9887e-10	1.12392e-07	13.6473
7289	ENSG00000078246	TULP3	TUB like protein 3	2.77762	5.95309	31.3036	5.00796e-10	1.12392e-07	13.9105
51430	ENSG00000094975	SUCO	SUN domain containing ossification factor	2.70733	5.95095	31.2893	5.02718e-10	1.12392e-07	13.9068
23365	ENSG00000196914	ARHGEF12	Rho guanine nucleotide exchange factor 12	3.24199	6.65319	31.266	5.05867e-10	1.12392e-07	13.9
222484	ENSG00000139517	LNX2	ligand of numb-protein X 2	4.5368	5.13339	31.2417	5.09162e-10	1.12392e-07	13.818
60312	ENSG00000196526	AFAP1	actin filament associated protein 1	4.06301	4.69678	31.1126	5.2713e-10	1.12392e-07	13.7596
55568	ENSG00000164574	GALNT10	polypeptide N-acetylgalactosaminyltransferase 10	2.45832	7.35957	31.0979	5.29216e-10	1.12392e-07	13.848
7465	ENSG00000166483	WEE1	WEE1 G2 checkpoint kinase	3.46355	5.01164	31.043	5.37111e-10	1.12392e-07	13.8058
4086	ENSG00000170365	SMAD1	SMAD family member 1	3.70747	4.7332	31.0324	5.38649e-10	1.12392e-07	13.7661
23080	ENSG00000105778	AVL9	AVL9 cell migration associated	2.5771	6.03727	30.9971	5.43805e-10	1.12392e-07	13.8285
23036	ENSG00000188994	ZNF292	zinc finger protein 292	3.10121	5.82186	30.9627	5.48878e-10	1.12392e-07	13.8181
4155	ENSG00000197971	MBP	myelin basic protein	3.48259	5.73881	30.9492	5.50892e-10	1.12392e-07	13.8114
57448	ENSG00000115760	BIRC6	baculoviral IAP repeat containing 6	2.99146	6.12978	30.8943	5.59127e-10	1.12392e-07	13.8008
23074	ENSG00000111647	BLTP3B	bridge-like lipid transfer protein family member 3B	3.50008	5.02743	30.8671	5.63265e-10	1.12392e-07	13.7597
571	ENSG00000156273	BACH1	BTB domain and CNC homolog 1	3.81491	4.99255	30.8152	5.71256e-10	1.12392e-07	13.7318
3842	ENSG00000083312	TNPO1	transportin 1	2.36144	7.15948	30.7659	5.78974e-10	1.12392e-07	13.7579
7110	ENSG00000144747	TMF1	TATA element modulatory factor 1	3.0341	5.72875	30.7645	5.79198e-10	1.12392e-07	13.7643
64786	ENSG00000121749	TBC1D15	TBC1 domain family member 15	2.60581	5.81543	30.6934	5.90512e-10	1.12392e-07	13.7463
23269	ENSG00000174197	MGA	MAX dimerization protein MGA	2.79549	5.79974	30.6746	5.9356e-10	1.12392e-07	13.741
25836	ENSG00000164190	NIPBL	NIPBL cohesin loading factor	2.8822	6.31146	30.5478	6.1449e-10	1.12392e-07	13.7054
79794	ENSG00000111412	SPRING1	SREBF pathway regulator in golgi 1	3.05081	5.43139	30.5138	6.20252e-10	1.12392e-07	13.6926
22850	ENSG00000101544	ADNP2	ADNP homeobox 2	3.09792	5.35402	30.5132	6.20351e-10	1.12392e-07	13.6902
53944	ENSG00000169118	CSNK1G1	casein kinase 1 gamma 1	2.90238	5.11337	30.4949	6.23472e-10	1.12392e-07	13.6804
133746	ENSG00000152409	JMY	junction mediating and regulatory protein, p53 cofactor	2.49853	6.22225	30.4934	6.23725e-10	1.12392e-07	13.6901
6917	ENSG00000187735	TCEA1	transcription elongation factor A1	2.35538	7.96134	30.4811	6.25839e-10	1.12392e-07	13.6719
55914	ENSG00000112851	ERBIN	erbb2 interacting protein	2.51771	6.04257	30.4699	6.27772e-10	1.12392e-07	13.6846
9867	ENSG00000198961	PJA2	praja ring finger ubiquitin ligase 2	2.94724	5.80871	30.4699	6.27774e-10	1.12392e-07	13.6851
57493	ENSG00000173706	HEG1	heart development protein with EGF like domains 1	4.93802	4.15942	30.3662	6.45944e-10	1.12982e-07	13.356
10565	ENSG00000066777	ARFGEF1	ADP ribosylation factor guanine nucleotide exchange factor 1	3.27946	5.81954	30.3515	6.48567e-10	1.12982e-07	13.6521
8864	ENSG00000132326	PER2	period circadian regulator 2	3.53271	4.79489	30.2518	6.66663e-10	1.136e-07	13.5809
8527	ENSG00000077044	DGKD	diacylglycerol kinase delta	2.74058	6.04796	30.2043	6.75493e-10	1.136e-07	13.6114
23160	ENSG00000163811	WDR43	WD repeat domain 43	2.66029	5.72765	30.1742	6.81152e-10	1.136e-07	13.6038
23469	ENSG00000118482	PHF3	PHD finger protein 3	3.02103	5.37083	30.1724	6.81483e-10	1.136e-07	13.5991
57186	ENSG00000188559	RALGAPA2	Ral GTPase activating protein catalytic subunit alpha 2	3.0616	5.71981	30.1694	6.82058e-10	1.136e-07	13.6021
6249	ENSG00000130779	CLIP1	CAP-Gly domain containing linker protein 1	2.80333	7.03517	30.1552	6.84757e-10	1.136e-07	13.5896
55186	ENSG00000114120	SLC25A36	solute carrier family 25 member 36	2.98522	6.68343	30.1375	6.88122e-10	1.136e-07	13.5887
64651	ENSG00000144655	CSRNP1	cysteine and serine rich nuclear protein 1	3.385	5.1429	30.1084	6.93713e-10	1.13705e-07	13.57
9693	ENSG00000109756	RAPGEF2	Rap guanine nucleotide exchange factor 2	3.82642	4.90059	30.0924	6.96799e-10	1.13705e-07	13.5372
51274	ENSG00000109787	KLF3	KLF transcription factor 3	2.81246	5.2519	30.0593	7.03253e-10	1.13705e-07	13.5676
10979	ENSG00000073712	FERMT2	FERM domain containing kindlin 2	2.85805	5.24088	30.0286	7.09294e-10	1.13705e-07	13.5586
11108	ENSG00000110851	PRDM4	PR/SET domain 4	3.13077	5.65596	30.0174	7.11502e-10	1.13705e-07	13.5596
23336	ENSG00000182253	SYNM	synemin	3.60436	4.59916	30.0109	7.12784e-10	1.13705e-07	13.4947
5980	ENSG00000009413	REV3L	REV3 like, DNA directed polymerase zeta catalytic subunit	3.31334	4.53469	29.988	7.1736e-10	1.13796e-07	13.4955
23140	ENSG00000074755	ZZEF1	zinc finger ZZ-type and EF-hand domain containing 1	2.43528	6.68911	29.9373	7.27591e-10	1.13887e-07	13.53
58508	ENSG00000055609	KMT2C	lysine methyltransferase 2C	2.6948	6.75292	29.8179	7.52337e-10	1.15169e-07	13.4963
9043	ENSG00000008294	SPAG9	sperm associated antigen 9	3.03318	5.92399	29.8117	7.53629e-10	1.15169e-07	13.5027
84669	ENSG00000170832	USP32	ubiquitin specific peptidase 32	2.68426	5.48585	29.8081	7.54409e-10	1.15169e-07	13.5015
23049	ENSG00000157106	SMG1	SMG1 nonsense mediated mRNA decay associated PI3K related kinase	3.17678	6.12809	29.6909	7.79688e-10	1.16449e-07	13.4679
7071	ENSG00000155090	KLF10	KLF transcription factor 10	3.43724	4.84132	29.6755	7.83075e-10	1.16449e-07	13.4346
114789	ENSG00000148339	SLC25A25	solute carrier family 25 member 25	2.29232	6.89087	29.6263	7.94023e-10	1.16449e-07	13.4382
5797	ENSG00000173482	PTPRM	protein tyrosine phosphatase receptor type M	2.8551	5.66854	29.5801	8.04448e-10	1.16449e-07	13.4378
57609	ENSG00000066084	DIP2B	disco interacting protein 2 homolog B	2.71061	5.49208	29.5694	8.06899e-10	1.16449e-07	13.4346
285605	ENSG00000169570	DTWD2	DTW domain containing 2	2.76441	5.12672	29.5311	8.15691e-10	1.16449e-07	13.4197
55002	ENSG00000150403	TMCO3	transmembrane and coiled-coil domains 3	3.32925	7.00883	29.5306	8.158e-10	1.16449e-07	13.4137
50484	ENSG00000048392	RRM2B	ribonucleotide reductase regulatory TP53 inducible subunit M2B	3.14549	6.06841	29.5293	8.16108e-10	1.16449e-07	13.4222
9314	ENSG00000136826	KLF4	KLF transcription factor 4	4.45779	3.97537	29.4779	8.2809e-10	1.17217e-07	13.1608
22824	ENSG00000164070	HSPA4L	heat shock protein family A (Hsp70) member 4 like	3.51888	5.01009	29.4708	8.29745e-10	1.17217e-07	13.3877
406	ENSG00000133794	BMAL1	basic helix-loop-helix ARNT like 1	3.85048	4.06132	29.4484	8.35052e-10	1.17383e-07	13.2453
2803	ENSG00000144674	GOLGA4	golgin A4	2.74575	6.94271	29.4085	8.44559e-10	1.18134e-07	13.3764
9736	ENSG00000115464	USP34	ubiquitin specific peptidase 34	2.89077	5.79243	29.3396	8.61297e-10	1.19885e-07	13.3691
7994	ENSG00000083168	KAT6A	lysine acetyltransferase 6A	2.8704	5.35615	29.2991	8.71312e-10	1.20687e-07	13.3572
6868	ENSG00000151694	ADAM17	ADAM metallopeptidase domain 17	4.15738	4.25699	29.2451	8.84847e-10	1.21967e-07	13.2025
29958	ENSG00000132837	DMGDH	dimethylglycine dehydrogenase	3.98488	4.41873	29.2053	8.94983e-10	1.22438e-07	13.2374
85460	ENSG00000178163	ZNF518B	zinc finger protein 518B	3.6007	4.60129	29.1979	8.96885e-10	1.22438e-07	13.2802
4616	ENSG00000099860	GADD45B	growth arrest and DNA damage inducible beta	3.15363	4.78728	29.1575	9.07327e-10	1.22546e-07	13.2974
5277	ENSG00000165195	PIGA	phosphatidylinositol glycan anchor biosynthesis class A	3.65087	4.45662	29.1348	9.13261e-10	1.22546e-07	13.2428
80854	ENSG00000145391	SETD7	SET domain containing 7, histone lysine methyltransferase	2.47457	7.07118	29.112	9.19256e-10	1.22546e-07	13.2868
129642	ENSG00000143797	MBOAT2	membrane bound O-acyltransferase domain containing 2	2.41041	6.4149	29.0504	9.35683e-10	1.24066e-07	13.2769
10135	ENSG00000105835	NAMPT	nicotinamide phosphoribosyltransferase	2.5018	6.47247	29.0367	9.39397e-10	1.24066e-07	13.2726
8976	ENSG00000106299	WASL	WASP like actin nucleation promoting factor	2.45021	6.02331	29.0052	9.47948e-10	1.24079e-07	13.2689
117583	ENSG00000116117	PARD3B	par-3 family cell polarity regulator beta	3.00499	4.9634	29.0042	9.48239e-10	1.24079e-07	13.2654
9871	ENSG00000150961	SEC24D	SEC24 homolog D, COPII coat complex component	4.65835	4.89257	28.971	9.57369e-10	1.24436e-07	13.1987
27242	ENSG00000146072	TNFRSF21	TNF receptor superfamily member 21	2.80447	5.22507	28.9519	9.62658e-10	1.24436e-07	13.2575
23645	ENSG00000087074	PPP1R15A	protein phosphatase 1 regulatory subunit 15A	2.67838	5.40652	28.9238	9.70502e-10	1.24436e-07	13.2505
80709	ENSG00000106948	AKNA	AT-hook transcription factor	3.5219	5.51351	28.9175	9.72275e-10	1.24436e-07	13.2476
10413	ENSG00000137693	YAP1	Yes1 associated transcriptional regulator	2.43921	6.75347	28.9154	9.72873e-10	1.24436e-07	13.2327
4193	ENSG00000135679	MDM2	MDM2 proto-oncogene	2.6915	7.58909	28.8972	9.77998e-10	1.24486e-07	13.2178
9053	ENSG00000135525	MAP7	microtubule associated protein 7	2.68509	6.28361	28.8721	9.85132e-10	1.24486e-07	13.2276
3659	ENSG00000125347	IRF1	interferon regulatory factor 1	2.95126	4.76521	28.8378	9.9496e-10	1.24486e-07	13.2117
3570	ENSG00000160712	IL6R	interleukin 6 receptor	2.62679	6.25291	28.8209	9.99856e-10	1.24486e-07	13.2126
23001	ENSG00000163625	WDFY3	WD repeat and FYVE domain containing 3	2.82115	6.01992	28.814	1.00187e-09	1.24486e-07	13.2146
5597	ENSG00000069956	MAPK6	mitogen-activated protein kinase 6	3.18838	6.76073	28.7682	1.01527e-09	1.24799e-07	13.1929
57542	ENSG00000087448	KLHL42	kelch like family member 42	2.38881	6.16763	28.7278	1.02727e-09	1.25204e-07	13.185
9469	ENSG00000122863	CHST3	carbohydrate sulfotransferase 3	2.91011	5.26318	28.7274	1.02738e-09	1.25204e-07	13.193
4133	ENSG00000078018	MAP2	microtubule associated protein 2	4.82283	3.95072	28.6739	1.04354e-09	1.25222e-07	12.8954
23358	ENSG00000162402	USP24	ubiquitin specific peptidase 24	2.42906	6.11581	28.672	1.04412e-09	1.25222e-07	13.1694
9709	ENSG00000051108	HERPUD1	homocysteine inducible ER protein with ubiquitin like domain 1	2.18567	7.35332	28.6573	1.04859e-09	1.25222e-07	13.1466
23499	ENSG00000127603	MACF1	microtubule actin crosslinking factor 1	2.60162	7.34655	28.6541	1.04958e-09	1.25222e-07	13.1476
11252	ENSG00000100266	PACSIN2	protein kinase C and casein kinase substrate in neurons 2	2.31182	8.1646	28.617	1.06102e-09	1.25601e-07	13.1261
58480	ENSG00000116574	RHOU	ras homolog family member U	3.05661	5.28426	28.6151	1.0616e-09	1.25601e-07	13.1601
50618	ENSG00000198399	ITSN2	intersectin 2	2.51066	5.56749	28.5639	1.07761e-09	1.26234e-07	13.1446
90411	ENSG00000180398	MCFD2	multiple coagulation factor deficiency 2, ER cargo receptor complex subunit	2.49875	6.41749	28.538	1.08582e-09	1.26234e-07	13.1255
55193	ENSG00000163939	PBRM1	polybromo 1	2.35593	7.19311	28.4992	1.09822e-09	1.26234e-07	13.1018
394	ENSG00000100852	ARHGAP5	Rho GTPase activating protein 5	2.54455	6.04432	28.495	1.09957e-09	1.26234e-07	13.1185
85403	ENSG00000144597	EAF1	ELL associated factor 1	2.54745	5.72273	28.4886	1.10166e-09	1.26234e-07	13.1209
219699	ENSG00000107731	UNC5B	unc-5 netrin receptor B	3.56086	4.17496	28.4881	1.10181e-09	1.26234e-07	13.0381
4124	ENSG00000112893	MAN2A1	mannosidase alpha class 2A member 1	4.03867	4.15153	28.4859	1.10252e-09	1.26234e-07	12.9982
51322	ENSG00000095787	WAC	WW domain containing adaptor with coiled-coil	2.36126	7.50911	28.4651	1.10927e-09	1.26497e-07	13.0874
22841	ENSG00000107560	RAB11FIP2	RAB11 family interacting protein 2	3.01099	4.81026	28.3773	1.13829e-09	1.28261e-07	13.0819
219988	ENSG00000166889	PATL1	PAT1 homolog 1, processing body mRNA decay factor	3.41788	5.29484	28.3519	1.14686e-09	1.28716e-07	13.0822
7803	ENSG00000112245	PTP4A1	protein tyrosine phosphatase 4A1	2.34456	7.26254	28.2726	1.17402e-09	1.31149e-07	13.032
57496	ENSG00000186260	MRTFB	myocardin related transcription factor B	2.49837	5.82809	28.1979	1.20027e-09	1.32613e-07	13.0324
23312	ENSG00000104093	DMXL2	Dmx like 2	2.55245	5.32767	28.1332	1.22354e-09	1.34128e-07	13.0189
4853	ENSG00000134250	NOTCH2	notch receptor 2	2.64378	5.3267	28.1068	1.23317e-09	1.34128e-07	13.0112
10114	ENSG00000110422	HIPK3	homeodomain interacting protein kinase 3	2.94725	4.98383	28.0773	1.24404e-09	1.34128e-07	13
55332	ENSG00000136048	DRAM1	DNA damage regulated autophagy modulator 1	2.8927	4.81579	28.0771	1.24411e-09	1.34128e-07	12.9967
55970	ENSG00000172380	GNG12	G protein subunit gamma 12	2.45606	5.9826	28.0604	1.25033e-09	1.34128e-07	12.9882
55602	ENSG00000168564	CDKN2AIP	CDKN2A interacting protein	3.50684	4.28471	28.0424	1.25702e-09	1.34128e-07	12.9325
726	ENSG00000149260	CAPN5	calpain 5	2.30067	6.03743	27.9755	1.2824e-09	1.35471e-07	12.9604
9475	ENSG00000134318	ROCK2	Rho associated coiled-coil containing protein kinase 2	2.6742	5.33312	27.8841	1.31795e-09	1.37579e-07	12.9446
7508	ENSG00000154767	XPC	XPC complex subunit, DNA damage recognition and repair factor	2.65386	7.23436	27.8643	1.32579e-09	1.37579e-07	12.9084
6239	ENSG00000124782	RREB1	ras responsive element binding protein 1	2.63242	5.48257	27.8517	1.33079e-09	1.37579e-07	12.9333
10672	ENSG00000120063	GNA13	G protein subunit alpha 13	3.0944	5.42033	27.8447	1.33361e-09	1.37579e-07	12.9332
79659	ENSG00000187240	DYNC2H1	dynein cytoplasmic 2 heavy chain 1	2.75557	5.56858	27.8422	1.33462e-09	1.37579e-07	12.93
3685	ENSG00000138448	ITGAV	integrin subunit alpha V	2.85708	5.51618	27.8337	1.33802e-09	1.37579e-07	12.9285
3005	ENSG00000189060	H1-0	H1.0 linker histone	3.59081	8.43242	27.8235	1.34212e-09	1.37579e-07	12.8842
5187	ENSG00000179094	PER1	period circadian regulator 1	2.95719	5.78365	27.7676	1.36484e-09	1.38451e-07	12.9055
3716	ENSG00000162434	JAK1	Janus kinase 1	3.1757	4.51656	27.7667	1.36525e-09	1.38451e-07	12.888
23057	ENSG00000157064	NMNAT2	nicotinamide nucleotide adenylyltransferase 2	3.35634	4.09157	27.6712	1.40511e-09	1.4086e-07	12.8133
5426	ENSG00000177084	POLE	DNA polymerase epsilon, catalytic subunit	2.46067	6.92525	27.6359	1.42015e-09	1.4086e-07	12.8412
10184	ENSG00000145685	LHFPL2	LHFPL tetraspan subfamily member 2	4.38611	3.47167	27.4193	1.51664e-09	1.4734e-07	12.4907
23362	ENSG00000156011	PSD3	pleckstrin and Sec7 domain containing 3	2.87874	4.81231	27.4141	1.51904e-09	1.4734e-07	12.8007
221656	ENSG00000165097	KDM1B	lysine demethylase 1B	2.67962	4.95582	27.3887	1.53088e-09	1.4734e-07	12.7956
5468	ENSG00000132170	PPARG	peroxisome proliferator activated receptor gamma	2.64256	4.97696	27.3773	1.53618e-09	1.4734e-07	12.7923
3399	ENSG00000117318	ID3	inhibitor of DNA binding 3	4.68185	5.6105	27.3579	1.54534e-09	1.4734e-07	12.7839
79618	ENSG00000147421	HMBOX1	homeobox containing 1	2.34376	5.99777	27.3545	1.54694e-09	1.4734e-07	12.7697
734	ENSG00000164823	OSGIN2	oxidative stress induced growth inhibitor family member 2	2.9886	4.81877	27.3389	1.55432e-09	1.4734e-07	12.7771
673	ENSG00000157764	BRAF	B-Raf proto-oncogene, serine/threonine kinase	3.1426	5.66092	27.316	1.56523e-09	1.4734e-07	12.7698
113251	ENSG00000161813	LARP4	La ribonucleoprotein 4	2.63126	6.28563	27.3	1.57292e-09	1.4734e-07	12.749
23607	ENSG00000198087	CD2AP	CD2 associated protein	2.49869	5.65822	27.2881	1.57865e-09	1.4734e-07	12.7569
83737	ENSG00000078747	ITCH	itchy E3 ubiquitin protein ligase	2.57579	5.45713	27.2799	1.58262e-09	1.4734e-07	12.7584
55672	ENSG00000219481	NBPF1	NBPF member 1	4.49168	4.32782	27.2614	1.59162e-09	1.47693e-07	12.66
85377	ENSG00000100139	MICALL1	MICAL like 1	2.65584	7.17916	27.2255	1.60923e-09	1.4884e-07	12.7088
10006	ENSG00000136754	ABI1	abl interactor 1	2.65904	5.38811	27.2076	1.6181e-09	1.49175e-07	12.7374
11215	ENSG00000023516	AKAP11	A-kinase anchoring protein 11	2.8732	4.6379	27.1799	1.63193e-09	1.49704e-07	12.7261
283131	ENSG00000245532	NEAT1	nuclear paraspeckle assembly transcript 1	1.94844	9.59113	27.175	1.63438e-09	1.49704e-07	12.6653
157769	ENSG00000176853	FAM91A1	family with sequence similarity 91 member A1	2.69146	5.35442	27.1325	1.65588e-09	1.51179e-07	12.7148
51366	ENSG00000104517	UBR5	ubiquitin protein ligase E3 component n-recognin 5	2.23652	6.9744	27.1222	1.66114e-09	1.51179e-07	12.6768
64393	ENSG00000172667	ZMAT3	zinc finger matrin-type 3	3.131	5.69807	27.0809	1.6824e-09	1.51646e-07	12.6963
4734	ENSG00000069869	NEDD4	NEDD4 E3 ubiquitin protein ligase	4.82752	4.08663	27.0601	1.69324e-09	1.51646e-07	12.5242
64412	ENSG00000125812	GZF1	GDNF inducible zinc finger protein 1	2.75281	5.50721	27.0504	1.6983e-09	1.51646e-07	12.6873
23116	ENSG00000198718	TOGARAM1	TOG array regulator of axonemal microtubules 1	3.16391	4.84612	26.9994	1.72528e-09	1.53256e-07	12.6735
80012	ENSG00000173889	PHC3	polyhomeotic homolog 3	3.24765	5.53629	26.9803	1.73555e-09	1.53256e-07	12.6679
50804	ENSG00000104177	MYEF2	myelin expression factor 2	3.52725	4.00787	26.9795	1.73593e-09	1.53256e-07	12.5961
66008	ENSG00000115993	TRAK2	trafficking kinesin protein 2	2.27267	5.78741	26.9758	1.73793e-09	1.53256e-07	12.6545
25932	ENSG00000169504	CLIC4	chloride intracellular channel 4	2.28535	6.6826	26.9429	1.75573e-09	1.54201e-07	12.6251
81539	ENSG00000111371	SLC38A1	solute carrier family 38 member 1	2.00868	7.80997	26.9338	1.76071e-09	1.54201e-07	12.6024
27324	ENSG00000103460	TOX3	TOX high mobility group box family member 3	3.48729	4.57762	26.9261	1.76493e-09	1.54201e-07	12.6365
342371	ENSG00000224470	ATXN1L	ataxin 1 like	3.20758	4.92819	26.9143	1.77141e-09	1.54226e-07	12.6487
3475	ENSG00000006652	IFRD1	interferon related developmental regulator 1	2.88576	6.88519	26.9058	1.77609e-09	1.54226e-07	12.6137
29072	ENSG00000181555	SETD2	SET domain containing 2, histone lysine methyltransferase	2.55128	6.47785	26.8491	1.80761e-09	1.54589e-07	12.6011
23086	ENSG00000110723	EXPH5	exophilin 5	2.76098	4.71799	26.8436	1.81072e-09	1.54589e-07	12.6265
79660	ENSG00000173281	PPP1R3B	protein phosphatase 1 regulatory subunit 3B	2.81534	4.89482	26.8389	1.81337e-09	1.54589e-07	12.6267
6498	ENSG00000136603	SKIL	SKI like proto-oncogene	3.78096	4.58498	26.8348	1.81571e-09	1.54589e-07	12.6001
151887	ENSG00000091986	CCDC80	coiled-coil domain containing 80	4.09975	3.97296	26.8182	1.82508e-09	1.54589e-07	12.5039
57551	ENSG00000160551	TAOK1	TAO kinase 1	2.3944	5.661	26.7983	1.83647e-09	1.54589e-07	12.6019
25924	ENSG00000170011	MYRIP	myosin VIIA and Rab interacting protein	2.56339	4.9542	26.7973	1.83703e-09	1.54589e-07	12.6137
1195	ENSG00000013441	CLK1	CDC like kinase 1	2.33109	6.40808	26.782	1.84579e-09	1.54589e-07	12.5793
5903	ENSG00000153201	RANBP2	RAN binding protein 2	2.05079	7.40929	26.778	1.84807e-09	1.54589e-07	12.5577
4253	ENSG00000150527	MIA2	MIA SH3 domain ER export factor 2	3.06934	6.20519	26.7541	1.86193e-09	1.54589e-07	12.5812
667	ENSG00000151914	DST	dystonin	3.10831	4.47615	26.7115	1.88687e-09	1.54848e-07	12.5749
8658	ENSG00000173273	TNKS	tankyrase	2.40748	5.95798	26.688	1.90081e-09	1.54931e-07	12.5598
1054	ENSG00000153879	CEBPG	CCAAT enhancer binding protein gamma	2.0161	7.48211	26.6447	1.92673e-09	1.54931e-07	12.5129
9882	ENSG00000136111	TBC1D4	TBC1 domain family member 4	3.29978	4.06376	26.6387	1.93037e-09	1.54931e-07	12.5159
26115	ENSG00000170921	TANC2	tetratricopeptide repeat, ankyrin repeat and coiled-coil containing 2	2.77088	4.61073	26.6368	1.93152e-09	1.54931e-07	12.5609
7068	ENSG00000151090	THRB	thyroid hormone receptor beta	3.31447	3.95694	26.5963	1.95617e-09	1.55792e-07	12.4899
85461	ENSG00000115183	TANC1	tetratricopeptide repeat, ankyrin repeat and coiled-coil containing 1	2.43572	6.31192	26.593	1.9582e-09	1.55792e-07	12.5212
1407	ENSG00000008405	CRY1	cryptochrome circadian regulator 1	3.14342	4.27476	26.5879	1.96134e-09	1.55792e-07	12.5248
118987	ENSG00000165650	PDZD8	PDZ domain containing 8	2.63157	5.5066	26.5633	1.97659e-09	1.55792e-07	12.5322
7832	ENSG00000159388	BTG2	BTG anti-proliferation factor 2	3.1165	6.21951	26.5567	1.98066e-09	1.55792e-07	12.5179
55356	ENSG00000163393	SLC22A15	solute carrier family 22 member 15	4.62951	3.46675	26.5417	1.99002e-09	1.56096e-07	12.2242
8805	ENSG00000122779	TRIM24	tripartite motif containing 24	2.37535	5.63372	26.5139	2.00753e-09	1.56794e-07	12.5113
55671	ENSG00000100796	PPP4R3A	protein phosphatase 4 regulatory subunit 3A	2.57235	6.16953	26.51	2.00996e-09	1.56794e-07	12.4988
64746	ENSG00000182827	ACBD3	acyl-CoA binding domain containing 3	2.56042	5.27485	26.5008	2.01581e-09	1.56819e-07	12.5165
23331	ENSG00000100154	TTC28	tetratricopeptide repeat domain 28	2.96526	4.55633	26.4823	2.02761e-09	1.57306e-07	12.5099
79875	ENSG00000187720	THSD4	thrombospondin type 1 domain containing 4	4.76858	3.83185	26.3861	2.09018e-09	1.60004e-07	12.2797
57561	ENSG00000113369	ARRDC3	arrestin domain containing 3	2.35668	5.62276	26.377	2.0962e-09	1.60004e-07	12.4672
3572	ENSG00000134352	IL6ST	interleukin 6 cytokine family signal transducer	2.34363	5.70982	26.342	2.11956e-09	1.61354e-07	12.4536
4217	ENSG00000197442	MAP3K5	mitogen-activated protein kinase kinase kinase 5	3.20876	4.7348	26.2814	2.16068e-09	1.61837e-07	12.4492
54520	ENSG00000125633	CCDC93	coiled-coil domain containing 93	2.35646	5.83919	26.2732	2.1663e-09	1.61837e-07	12.4279
23132	ENSG00000164080	RAD54L2	RAD54 like 2	2.29056	6.05779	26.2715	2.16748e-09	1.61837e-07	12.4212
84919	ENSG00000158615	PPP1R15B	protein phosphatase 1 regulatory subunit 15B	2.4878	6.1992	26.2611	2.17462e-09	1.61837e-07	12.4161
8493	ENSG00000170836	PPM1D	protein phosphatase, Mg2+/Mn2+ dependent 1D	2.92394	4.41359	26.2531	2.1802e-09	1.61837e-07	12.4348
5045	ENSG00000140564	FURIN	furin, paired basic amino acid cleaving enzyme	2.37198	6.1071	26.2415	2.18823e-09	1.61837e-07	12.4109
3915	ENSG00000135862	LAMC1	laminin subunit gamma 1	2.16184	7.58871	26.2371	2.1913e-09	1.61837e-07	12.3777
253782	ENSG00000172292	CERS6	ceramide synthase 6	2.81508	5.26869	26.236	2.19205e-09	1.61837e-07	12.4334
10079	ENSG00000054793	ATP9A	ATPase phospholipid transporting 9A (putative)	2.34868	6.08735	26.2328	2.1943e-09	1.61837e-07	12.4083
9113	ENSG00000131023	LATS1	large tumor suppressor kinase 1	2.78414	5.2578	26.1976	2.219e-09	1.62102e-07	12.421
55062	ENSG00000070540	WIPI1	WD repeat domain, phosphoinositide interacting 1	2.57177	4.77144	26.1498	2.25309e-09	1.62225e-07	12.4103
10499	ENSG00000140396	NCOA2	nuclear receptor coactivator 2	2.47495	5.29492	26.1458	2.25597e-09	1.62225e-07	12.4011
9685	ENSG00000113282	CLINT1	clathrin interactor 1	2.37514	6.02018	26.1457	2.25604e-09	1.62225e-07	12.3817
5799	ENSG00000155093	PTPRN2	protein tyrosine phosphatase receptor type N2	4.02847	3.76167	26.1385	2.26126e-09	1.62225e-07	12.2725
4297	ENSG00000118058	KMT2A	lysine methyltransferase 2A	2.34892	7.13334	26.1369	2.26241e-09	1.62225e-07	12.3534
8573	ENSG00000147044	CASK	calcium/calmodulin dependent serine protein kinase	2.395	5.95377	26.1206	2.27421e-09	1.62661e-07	12.3753
5465	ENSG00000186951	PPARA	peroxisome proliferator activated receptor alpha	3.28596	4.47021	26.1004	2.28894e-09	1.63303e-07	12.3836
4205	ENSG00000068305	MEF2A	myocyte enhancer factor 2A	3.23631	5.99143	26.086	2.29953e-09	1.63647e-07	12.3717
85458	ENSG00000150764	DIXDC1	DIX domain containing 1	4.47393	4.20399	26.07	2.31132e-09	1.64075e-07	12.2992
1540	ENSG00000083799	CYLD	CYLD lysine 63 deubiquitinase	2.76116	5.10994	26.0535	2.32355e-09	1.64532e-07	12.377
284371	ENSG00000197608	ZNF841	zinc finger protein 841	2.71582	5.11608	26.0285	2.34224e-09	1.65162e-07	12.3684
7525	ENSG00000176105	YES1	YES proto-oncogene 1, Src family tyrosine kinase	2.18331	5.97632	26.026	2.34409e-09	1.65162e-07	12.3415
83667	ENSG00000130766	SESN2	sestrin 2	2.04817	7.54444	26.0107	2.35562e-09	1.65564e-07	12.3022
121274	ENSG00000167528	ZNF641	zinc finger protein 641	2.53003	5.14786	26.0008	2.36315e-09	1.65683e-07	12.3575
3998	ENSG00000074695	LMAN1	lectin, mannose binding 1	2.18944	6.95232	25.9897	2.37155e-09	1.65862e-07	12.3067
23167	ENSG00000132294	EFR3A	EFR3 homolog A	2.8173	5.01135	25.9652	2.39032e-09	1.66765e-07	12.35
57587	ENSG00000164323	CFAP97	cilia and flagella associated protein 97	2.34253	5.58624	25.9523	2.40022e-09	1.67041e-07	12.3293
55454	ENSG00000169826	CSGALNACT2	chondroitin sulfate N-acetylgalactosaminyltransferase 2	3.11205	4.04482	25.9247	2.42166e-09	1.67715e-07	12.3067
84645	ENSG00000128346	C22orf23	chromosome 22 open reading frame 23	2.46686	5.12754	25.8939	2.44583e-09	1.67863e-07	12.3227
23077	ENSG00000005810	MYCBP2	MYC binding protein 2	2.34887	7.02822	25.89	2.44888e-09	1.67863e-07	12.2729
23328	ENSG00000111961	SASH1	SAM and SH3 domain containing 1	3.07912	4.72891	25.8843	2.45336e-09	1.67863e-07	12.3246
3976	ENSG00000128342	LIF	LIF interleukin 6 family cytokine	3.90831	3.66129	25.8615	2.47146e-09	1.68695e-07	12.182
112574	ENSG00000178996	SNX18	sorting nexin 18	2.79487	5.01023	25.8259	2.50004e-09	1.70236e-07	12.3047
152137	ENSG00000152492	CCDC50	coiled-coil domain containing 50	2.16174	6.33017	25.7807	2.53685e-09	1.72299e-07	12.2504
3097	ENSG00000010818	HIVEP2	HIVEP zinc finger 2	2.80217	5.59727	25.7259	2.58227e-09	1.73623e-07	12.2589
9818	ENSG00000139496	NUP58	nucleoporin 58	3.0272	4.63085	25.7125	2.59354e-09	1.73623e-07	12.2687
8925	ENSG00000103657	HERC1	HECT and RLD domain containing E3 ubiquitin protein ligase family member 1	2.70238	6.06292	25.7074	2.59786e-09	1.73623e-07	12.2384
54664	ENSG00000106460	TMEM106B	transmembrane protein 106B	2.61983	5.09214	25.7038	2.60089e-09	1.73623e-07	12.2624
11153	ENSG00000198855	FICD	FIC domain protein adenylyltransferase	2.62706	5.05923	25.6856	2.61631e-09	1.73652e-07	12.2571
83548	ENSG00000136152	COG3	component of oligomeric golgi complex 3	2.77817	5.09538	25.6842	2.61748e-09	1.73652e-07	12.257
23670	ENSG00000135048	CEMIP2	cell migration inducing hyaluronidase 2	3.07608	5.05355	25.6636	2.63503e-09	1.73671e-07	12.2527
26353	ENSG00000152137	HSPB8	heat shock protein family B (small) member 8	3.86532	3.75027	25.6624	2.6361e-09	1.73671e-07	12.1482
23360	ENSG00000109920	FNBP4	formin binding protein 4	2.2491	7.02282	25.6293	2.66458e-09	1.75015e-07	12.1841
29967	ENSG00000147650	LRP12	LDL receptor related protein 12	3.70309	3.78836	25.5876	2.701e-09	1.76483e-07	12.1446
50999	ENSG00000117500	TMED5	transmembrane p24 trafficking protein 5	2.31922	5.79283	25.5676	2.71874e-09	1.76483e-07	12.1949
9451	ENSG00000172071	EIF2AK3	eukaryotic translation initiation factor 2 alpha kinase 3	3.28464	4.34272	25.565	2.72106e-09	1.76483e-07	12.2097
55125	ENSG00000101639	CEP192	centrosomal protein 192	2.54926	4.74744	25.5636	2.72229e-09	1.76483e-07	12.221
727758	ENSG00000290877	ROCK1P1	Rho associated coiled-coil containing protein kinase 1 pseudogene 1	3.6475	3.64358	25.502	2.77757e-09	1.79656e-07	12.097
8439	ENSG00000035681	NSMAF	neutral sphingomyelinase activation associated factor	2.55594	5.1612	25.4866	2.79164e-09	1.79752e-07	12.1883
55252	ENSG00000143970	ASXL2	ASXL transcriptional regulator 2	2.60873	4.90878	25.4796	2.79805e-09	1.79752e-07	12.1917
56288	ENSG00000148498	PARD3	par-3 family cell polarity regulator	2.44217	4.87149	25.4559	2.81979e-09	1.80333e-07	12.1835
7402	ENSG00000152818	UTRN	utrophin	1.96972	6.97405	25.4359	2.83839e-09	1.80401e-07	12.1171
54726	ENSG00000164164	OTUD4	OTU deubiquitinase 4	2.87894	4.47549	25.4296	2.84423e-09	1.80401e-07	12.1761
9674	ENSG00000235750	KIAA0040	KIAA0040	3.38325	3.7316	25.4274	2.84626e-09	1.80401e-07	12.1074
10260	ENSG00000174485	DENND4A	DENN domain containing 4A	2.60821	5.07585	25.4154	2.85756e-09	1.80419e-07	12.1672
55254	ENSG00000176142	TMEM39A	transmembrane protein 39A	2.27629	5.34601	25.3778	2.893e-09	1.82144e-07	12.144
372	ENSG00000095139	ARCN1	archain 1	2.08029	7.63452	25.3429	2.92645e-09	1.83436e-07	12.0734
54206	ENSG00000116285	ERRFI1	ERBB receptor feedback inhibitor 1	3.13639	5.70607	25.3159	2.95258e-09	1.84666e-07	12.1223
114803	ENSG00000162601	MYSM1	Myb like, SWIRM and MPN domains 1	2.76539	4.69242	25.2564	3.01103e-09	1.87411e-07	12.121
155435	ENSG00000184863	RBM33	RNA binding motif protein 33	2.38868	5.75805	25.2535	3.01397e-09	1.87411e-07	12.0904
7779	ENSG00000170385	SLC30A1	solute carrier family 30 member 1	5.55973	4.54847	25.2455	3.02189e-09	1.87411e-07	12.0166
23471	ENSG00000067167	TRAM1	translocation associated membrane protein 1	2.01169	6.7468	25.2445	3.02286e-09	1.87411e-07	12.0566
387119	ENSG00000111860	CEP85L	centrosomal protein 85 like	4.37026	3.39733	25.1758	3.09242e-09	1.89601e-07	11.8661
54542	ENSG00000056586	RC3H2	ring finger and CCCH-type domains 2	3.47097	3.88553	25.1738	3.09442e-09	1.89601e-07	12.0445
81631	ENSG00000140941	MAP1LC3B	microtubule associated protein 1 light chain 3 beta	2.43121	6.6804	25.1701	3.09826e-09	1.89601e-07	12.0359
54845	ENSG00000104413	ESRP1	epithelial splicing regulatory protein 1	1.97845	7.02419	25.1558	3.11292e-09	1.89843e-07	12.0195
4763	ENSG00000196712	NF1	neurofibromin 1	2.12878	5.79366	25.1532	3.11558e-09	1.89843e-07	12.0521
116984	ENSG00000047365	ARAP2	ArfGAP with RhoGAP domain, ankyrin repeat and PH domain 2	5.97268	2.87727	25.1087	3.16198e-09	1.91662e-07	11.2519
147339	ENSG00000152242	ARK2N	arkadia (RNF111) N-terminal like PKA signaling regulator 2N	2.58622	5.09401	25.0942	3.17718e-09	1.91662e-07	12.059
57515	ENSG00000111897	SERINC1	serine incorporator 1	2.02082	6.93175	25.0861	3.18579e-09	1.91662e-07	11.9975
9444	ENSG00000112531	QKI	QKI, KH domain containing RNA binding	4.30827	3.60912	25.0813	3.19083e-09	1.91662e-07	11.9039
7559	ENSG00000164631	ZNF12	zinc finger protein 12	2.33381	5.41728	25.0758	3.19675e-09	1.91662e-07	12.0399
85457	ENSG00000198894	CIPC	CLOCK interacting pacemaker	2.17282	5.87302	25.0727	3.2e-09	1.91662e-07	12.0224
1316	ENSG00000067082	KLF6	KLF transcription factor 6	2.44019	5.33524	25.0573	3.21644e-09	1.91662e-07	12.0376
374383	ENSG00000188211	NCR3LG1	natural killer cell cytotoxicity receptor 3 ligand 1	3.25215	4.09209	25.0511	3.22312e-09	1.91662e-07	12.0325
8036	ENSG00000108061	SHOC2	SHOC2 leucine rich repeat scaffold protein	2.26209	5.78807	25.048	3.22642e-09	1.91662e-07	12.0176
2355	ENSG00000075426	FOSL2	FOS like 2, AP-1 transcription factor subunit	2.27122	5.15149	25.027	3.24903e-09	1.91984e-07	12.031
360023	ENSG00000177888	ZBTB41	zinc finger and BTB domain containing 41	2.98574	4.03607	25.0198	3.2569e-09	1.91984e-07	12.0258
283431	ENSG00000139354	GAS2L3	growth arrest specific 2 like 3	4.46419	3.45483	25.0115	3.2659e-09	1.91984e-07	11.8199
130074	ENSG00000152102	FAM168B	family with sequence similarity 168 member B	1.88789	7.16153	24.9942	3.28477e-09	1.91984e-07	11.9596
728377	NA	ARHGEF34P	Rho guanine nucleotide exchange factor 34, pseudogene	3.21146	3.86748	24.9942	3.28482e-09	1.91984e-07	11.9973
23379	ENSG00000164151	ICE1	interactor of little elongation complex ELL subunit 1	2.58576	5.05973	24.9923	3.28682e-09	1.91984e-07	12.0253
6744	ENSG00000138434	ITPRID2	ITPR interacting domain containing 2	2.41525	6.78322	24.9563	3.32661e-09	1.9306e-07	11.9589
23271	ENSG00000118200	CAMSAP2	calmodulin regulated spectrin associated protein family member 2	2.95377	5.8314	24.9491	3.33465e-09	1.9306e-07	11.9906
7057	ENSG00000137801	THBS1	thrombospondin 1	3.10823	4.73577	24.9418	3.34275e-09	1.9306e-07	12.0169
26060	ENSG00000157500	APPL1	adaptor protein, phosphotyrosine interacting with PH domain and leucine zipper 1	2.22971	5.55792	24.9367	3.34847e-09	1.9306e-07	11.9864
57621	ENSG00000181472	ZBTB2	zinc finger and BTB domain containing 2	3.13411	4.34803	24.9263	3.36011e-09	1.9306e-07	12.0066
5378	ENSG00000064933	PMS1	PMS1 homolog 1, mismatch repair system component	2.58639	5.12943	24.9168	3.37084e-09	1.9306e-07	11.9975
84146	ENSG00000122482	ZNF644	zinc finger protein 644	2.3667	5.41918	24.9157	3.37204e-09	1.9306e-07	11.9855
1956	ENSG00000146648	EGFR	epidermal growth factor receptor	3.66097	3.8966	24.9154	3.37234e-09	1.9306e-07	11.9531
867	ENSG00000110395	CBL	Cbl proto-oncogene	2.51278	4.72955	24.8982	3.39188e-09	1.93787e-07	12
10484	ENSG00000100934	SEC23A	SEC23 homolog A, COPII coat complex component	2.16775	5.71188	24.8839	3.40819e-09	1.94328e-07	11.9622
55758	ENSG00000117625	RCOR3	REST corepressor 3	2.19702	5.62875	24.8542	3.44223e-09	1.95772e-07	11.955
10787	ENSG00000061676	NCKAP1	NCK associated protein 1	2.59685	6.82545	24.8338	3.46592e-09	1.96045e-07	11.9165
399665	ENSG00000167106	EEIG1	estrogen-induced osteoclastogenesis regulator 1	2.2988	7.76057	24.8172	3.48524e-09	1.96505e-07	11.8887
26286	ENSG00000242247	ARFGAP3	ADP ribosylation factor GTPase activating protein 3	2.15883	6.61177	24.8149	3.48789e-09	1.96505e-07	11.9114
26524	ENSG00000150457	LATS2	large tumor suppressor kinase 2	4.59863	3.92251	24.8079	3.49612e-09	1.96579e-07	11.8627
8924	ENSG00000128731	HERC2	HECT and RLD domain containing E3 ubiquitin protein ligase 2	4.76151	3.17645	24.7575	3.55592e-09	1.99153e-07	11.6135
23325	ENSG00000136051	WASHC4	WASH complex subunit 4	2.29526	5.20016	24.7428	3.57361e-09	1.99354e-07	11.9322
57602	ENSG00000055483	USP36	ubiquitin specific peptidase 36	2.32503	6.77989	24.7338	3.58436e-09	1.99354e-07	11.88
55207	ENSG00000134108	ARL8B	ADP ribosylation factor like GTPase 8B	1.95379	6.50128	24.7312	3.58759e-09	1.99354e-07	11.8831
5007	ENSG00000110048	OSBP	oxysterol binding protein	2.3528	6.98325	24.6999	3.62557e-09	2.00071e-07	11.8634
91445	ENSG00000138942	RNF185	ring finger protein 185	1.93048	6.52225	24.6923	3.63499e-09	2.00071e-07	11.8686
8621	ENSG00000065883	CDK13	cyclin dependent kinase 13	2.78938	5.81596	24.6916	3.63573e-09	2.00071e-07	11.8996
6674	ENSG00000104450	SPAG1	sperm associated antigen 1	2.8548	4.25134	24.6816	3.64805e-09	2.00083e-07	11.9264
5611	ENSG00000102580	DNAJC3	DnaJ heat shock protein family (Hsp40) member C3	2.36145	5.55946	24.68	3.65005e-09	2.00083e-07	11.8988
29761	ENSG00000155313	USP25	ubiquitin specific peptidase 25	2.91106	5.16595	24.6577	3.67771e-09	2.00477e-07	11.9114
50640	ENSG00000135241	PNPLA8	patatin like phospholipase domain containing 8	2.34226	5.00468	24.6571	3.67841e-09	2.00477e-07	11.9095
54778	ENSG00000157450	RNF111	ring finger protein 111	2.65939	4.89076	24.65	3.68727e-09	2.00575e-07	11.9134
91694	ENSG00000154359	LONRF1	LON peptidase N-terminal domain and ring finger 1	3.8102	3.85316	24.6334	3.708e-09	2.01145e-07	11.8533
26118	ENSG00000109046	WSB1	WD repeat and SOCS box containing 1	2.77572	6.31426	24.6274	3.71557e-09	2.01145e-07	11.8602
22843	ENSG00000175175	PPM1E	protein phosphatase, Mg2+/Mn2+ dependent 1E	3.95929	3.30199	24.6246	3.719e-09	2.01145e-07	11.7312
54455	ENSG00000037637	FBXO42	F-box protein 42	2.13712	6.05516	24.6095	3.73807e-09	2.01792e-07	11.8548
3977	ENSG00000113594	LIFR	LIF receptor subunit alpha	3.19363	4.07105	24.5936	3.7583e-09	2.02063e-07	11.8839
9969	ENSG00000108510	MED13	mediator complex subunit 13	2.31398	6.00621	24.5865	3.76741e-09	2.02063e-07	11.8502
25831	ENSG00000092148	HECTD1	HECT domain E3 ubiquitin protein ligase 1	2.97207	7.38357	24.5788	3.7772e-09	2.02063e-07	11.8164
57510	ENSG00000124571	XPO5	exportin 5	1.92907	7.17305	24.559	3.80262e-09	2.02961e-07	11.8059
23411	ENSG00000096717	SIRT1	sirtuin 1	3.23758	4.82484	24.5357	3.8329e-09	2.03807e-07	11.8796
220213	ENSG00000165312	OTUD1	OTU deubiquitinase 1	3.35252	4.00619	24.5302	3.83999e-09	2.03807e-07	11.8543
8826	ENSG00000140575	IQGAP1	IQ motif containing GTPase activating protein 1	2.71559	6.06968	24.5117	3.86418e-09	2.04326e-07	11.8266
56888	ENSG00000176407	KCMF1	potassium channel modulatory factor 1	2.08131	6.24803	24.4536	3.94136e-09	2.06847e-07	11.793
64795	ENSG00000153561	RMND5A	required for meiotic nuclear division 5 homolog A	2.29928	6.22102	24.4416	3.95762e-09	2.06847e-07	11.7918
57688	ENSG00000130449	ZSWIM6	zinc finger SWIM-type containing 6	2.93738	3.95472	24.4269	3.9774e-09	2.06847e-07	11.8289
253461	ENSG00000177311	ZBTB38	zinc finger and BTB domain containing 38	2.84394	4.22979	24.4033	4.00966e-09	2.08143e-07	11.833
51175	ENSG00000074935	TUBE1	tubulin epsilon 1	2.81768	4.86541	24.3976	4.01745e-09	2.08167e-07	11.8286
55102	ENSG00000066739	ATG2B	autophagy related 2B	2.40301	5.19826	24.3895	4.02847e-09	2.08358e-07	11.8107
8897	ENSG00000100330	MTMR3	myotubularin related protein 3	2.40239	5.99367	24.3592	4.07044e-09	2.09412e-07	11.7711
253959	ENSG00000174373	RALGAPA1	Ral GTPase activating protein catalytic subunit alpha 1	3.20701	5.47052	24.3532	4.07883e-09	2.09412e-07	11.7996
253260	ENSG00000164327	RICTOR	RPTOR independent companion of MTOR complex 2	3.10962	4.14808	24.3492	4.0844e-09	2.09412e-07	11.8092
23243	ENSG00000206560	ANKRD28	ankyrin repeat domain 28	2.28523	5.69989	24.3173	4.12926e-09	2.10882e-07	11.7652
2872	ENSG00000099875	MKNK2	MAPK interacting serine/threonine kinase 2	1.99953	9.11776	24.2871	4.17221e-09	2.12273e-07	11.6811
23335	ENSG00000091157	WDR7	WD repeat domain 7	2.44729	4.58088	24.2817	4.17999e-09	2.12273e-07	11.7915
11101	ENSG00000107669	ATE1	arginyltransferase 1	2.28829	5.00447	24.2714	4.19485e-09	2.12273e-07	11.7745
3840	ENSG00000186432	KPNA4	karyopherin subunit alpha 4	1.95183	6.6005	24.2683	4.1993e-09	2.12273e-07	11.7155
1105	ENSG00000153922	CHD1	chromodomain helicase DNA binding protein 1	2.33281	5.22273	24.263	4.2069e-09	2.12273e-07	11.7643
65986	ENSG00000205189	ZBTB10	zinc finger and BTB domain containing 10	3.01388	5.63976	24.248	4.22863e-09	2.12496e-07	11.7538
132660	ENSG00000189308	LIN54	lin-54 DREAM MuvB core complex component	2.84064	4.35785	24.2431	4.2357e-09	2.12496e-07	11.7805
200576	ENSG00000115020	PIKFYVE	phosphoinositide kinase, FYVE-type zinc finger containing	3.04724	4.68942	24.238	4.24323e-09	2.12498e-07	11.7782
9908	ENSG00000138757	G3BP2	G3BP stress granule assembly factor 2	1.99389	6.86648	24.2101	4.28412e-09	2.13792e-07	11.688
57148	ENSG00000170471	RALGAPB	Ral GTPase activating protein non-catalytic subunit beta	2.42056	6.0606	24.1946	4.30696e-09	2.14343e-07	11.7102
23259	ENSG00000085788	DDHD2	DDHD domain containing 2	3.05086	4.20095	24.1823	4.32535e-09	2.14343e-07	11.7556
55041	ENSG00000115762	PLEKHB2	pleckstrin homology domain containing B2	2.04501	6.13891	24.1308	4.40277e-09	2.16828e-07	11.6803
9425	ENSG00000153046	CDYL	chromodomain Y like	2.47014	4.75441	24.1271	4.40841e-09	2.16828e-07	11.7339
223082	ENSG00000180233	ZNRF2	zinc and ring finger 2	2.8983	3.94572	24.1186	4.42132e-09	2.16828e-07	11.7268
5357	ENSG00000120756	PLS1	plastin 1	4.0013	3.85653	24.0579	4.51508e-09	2.20644e-07	11.6553
25978	ENSG00000083937	CHMP2B	charged multivesicular body protein 2B	2.03977	5.62114	24.0543	4.52074e-09	2.20644e-07	11.6709
7286	ENSG00000143367	TUFT1	tuftelin 1	3.0938	5.639	24.0334	4.55367e-09	2.21476e-07	11.678
26137	ENSG00000181722	ZBTB20	zinc finger and BTB domain containing 20	2.0442	5.77358	24.0325	4.55511e-09	2.21476e-07	11.6573
56929	ENSG00000145780	FEM1C	fem-1 homolog C	2.6598	5.22643	24.0226	4.57062e-09	2.21851e-07	11.6839
11260	ENSG00000184575	XPOT	exportin for tRNA	2.08619	8.52206	24.0102	4.59031e-09	2.22315e-07	11.586
140775	ENSG00000176994	SMCR8	SMCR8-C9orf72 complex subunit	3.07776	5.27472	23.998	4.60982e-09	2.22612e-07	11.6793
55601	ENSG00000137628	DDX60	DExD/H-box helicase 60	5.31557	2.66572	23.9841	4.63213e-09	2.23219e-07	11.0306
26010	ENSG00000196141	SPATS2L	spermatogenesis associated serine rich 2 like	2.48729	5.50699	23.9804	4.63812e-09	2.23219e-07	11.6548
6670	ENSG00000172845	SP3	Sp3 transcription factor	2.30452	5.67612	23.9751	4.64666e-09	2.23252e-07	11.6437
6309	ENSG00000109929	SC5D	sterol-C5-desaturase	2.554	6.55972	23.9631	4.66609e-09	2.23429e-07	11.6119
4089	ENSG00000141646	SMAD4	SMAD family member 4	2.07938	5.69982	23.9505	4.6866e-09	2.2397e-07	11.6309
12	ENSG00000196136	SERPINA3	serpin family A member 3	3.33414	3.52386	23.9464	4.69316e-09	2.2397e-07	11.6163
55728	ENSG00000078177	N4BP2	NEDD4 binding protein 2	3.19039	3.90678	23.9186	4.7389e-09	2.24446e-07	11.6503
83931	ENSG00000196182	STK40	serine/threonine kinase 40	1.86759	7.42111	23.912	4.74981e-09	2.24446e-07	11.5659
57761	ENSG00000101255	TRIB3	tribbles pseudokinase 3	2.27628	9.47196	23.907	4.75808e-09	2.24446e-07	11.5397
5205	ENSG00000081923	ATP8B1	ATPase phospholipid transporting 8B1	2.14018	5.51056	23.907	4.75808e-09	2.24446e-07	11.6233
149013	ENSG00000268043	NBPF12	NBPF member 12	2.37203	5.07498	23.9025	4.76557e-09	2.24446e-07	11.6423
56271	ENSG00000102409	BEX4	brain expressed X-linked 4	2.33025	5.01035	23.8965	4.77542e-09	2.24446e-07	11.6422
84162	ENSG00000138688	BLTP1	bridge-like lipid transfer protein family member 1	3.8118	5.42205	23.8925	4.78217e-09	2.24446e-07	11.6477
57584	ENSG00000107863	ARHGAP21	Rho GTPase activating protein 21	2.48023	5.48764	23.7855	4.96427e-09	2.31083e-07	11.5851
4097	ENSG00000197063	MAFG	MAF bZIP transcription factor G	1.90323	6.44237	23.7507	5.02511e-09	2.3279e-07	11.531
5565	ENSG00000131791	PRKAB2	protein kinase AMP-activated non-catalytic subunit beta 2	2.19671	5.10817	23.7505	5.02554e-09	2.3279e-07	11.5839
9728	ENSG00000138593	SECISBP2L	SECIS binding protein 2 like	2.15769	5.80389	23.7257	5.06935e-09	2.34096e-07	11.5461
1983	ENSG00000100664	EIF5	eukaryotic translation initiation factor 5	1.81106	8.5987	23.7249	5.07074e-09	2.34096e-07	11.4788
5516	ENSG00000104695	PPP2CB	protein phosphatase 2 catalytic subunit beta	2.37912	6.40119	23.7206	5.07847e-09	2.34096e-07	11.526
114880	ENSG00000079156	OSBPL6	oxysterol binding protein like 6	3.32279	3.63034	23.6971	5.12055e-09	2.34892e-07	11.5485
23429	ENSG00000163602	RYBP	RING1 and YY1 binding protein	2.15374	5.77859	23.6863	5.13996e-09	2.35202e-07	11.5326
6400	ENSG00000071537	SEL1L	SEL1L adaptor subunit of SYVN1 ubiquitin ligase	2.35574	7.00316	23.6802	5.15102e-09	2.35202e-07	11.4936
4550	NA	RNR2	l-rRNA	1.85432	15.8305	23.6796	5.15216e-09	2.35202e-07	11.4594
22853	ENSG00000164715	LMTK2	lemur tyrosine kinase 2	3.09238	5.56588	23.6586	5.19038e-09	2.35543e-07	11.5458
285141	ENSG00000204334	ERICH2	glutamate rich 2	4.54933	3.21589	23.6572	5.1928e-09	2.35543e-07	11.3431
64324	ENSG00000165671	NSD1	nuclear receptor binding SET domain protein 1	1.99004	7.0773	23.5944	5.30912e-09	2.3929e-07	11.4568
2000	ENSG00000102034	ELF4	E74 like ETS transcription factor 4	3.04166	3.84422	23.5791	5.33782e-09	2.40202e-07	11.536
168451	ENSG00000177683	THAP5	THAP domain containing 5	2.57285	5.04964	23.5727	5.34995e-09	2.40319e-07	11.5279
57494	ENSG00000166532	RIMKLB	ribosomal modification protein rimK like family member B	2.29284	4.99181	23.5575	5.37872e-09	2.40764e-07	11.52
5170	ENSG00000140992	PDPK1	3-phosphoinositide dependent protein kinase 1	2.23211	5.56004	23.5546	5.38423e-09	2.40764e-07	11.4941
54822	ENSG00000092439	TRPM7	transient receptor potential cation channel subfamily M member 7	3.44636	5.41319	23.544	5.40437e-09	2.40906e-07	11.5168
9663	ENSG00000101577	LPIN2	lipin 2	2.04784	5.6589	23.5229	5.44495e-09	2.41717e-07	11.4758
201562	ENSG00000206527	HACD2	3-hydroxyacyl-CoA dehydratase 2	5.71265	2.55064	23.5168	5.45662e-09	2.41717e-07	10.7342
22990	ENSG00000100731	PCNX1	pecanex 1	2.178	5.70875	23.5077	5.47426e-09	2.42121e-07	11.4699
8462	ENSG00000172059	KLF11	KLF transcription factor 11	2.98874	4.74693	23.4945	5.49995e-09	2.42713e-07	11.5152
4494	ENSG00000198417	MT1F	metallothionein 1F	3.91565	3.27546	23.4897	5.50933e-09	2.42713e-07	11.3821
204851	ENSG00000163349	HIPK1	homeodomain interacting protein kinase 1	3.64132	5.48543	23.4762	5.53562e-09	2.42713e-07	11.4926
57708	ENSG00000198160	MIER1	MIER1 transcriptional regulator	2.67623	4.451	23.4746	5.53893e-09	2.42713e-07	11.5116
9453	ENSG00000152904	GGPS1	geranylgeranyl diphosphate synthase 1	1.85139	6.44933	23.4681	5.55166e-09	2.42896e-07	11.4255
9329	ENSG00000125484	GTF3C4	general transcription factor IIIC subunit 4	2.55025	4.26057	23.4615	5.56465e-09	2.43089e-07	11.5085
79646	ENSG00000120137	PANK3	pantothenate kinase 3	2.1634	5.077	23.4476	5.59216e-09	2.43742e-07	11.4745
55183	ENSG00000080345	RIF1	replication timing regulatory factor 1	2.38026	4.67597	23.4449	5.59755e-09	2.43742e-07	11.4925
54832	ENSG00000129003	VPS13C	vacuolar protein sorting 13 homolog C	2.95999	5.35419	23.441	5.60534e-09	2.43742e-07	11.4731
142891	ENSG00000156671	SAMD8	sterile alpha motif domain containing 8	2.02844	5.49958	23.4347	5.6179e-09	2.43915e-07	11.4495
5208	ENSG00000123836	PFKFB2	6-phosphofructo-2-kinase/fructose-2,6-biphosphatase 2	2.77423	4.73717	23.423	5.64115e-09	2.44177e-07	11.4874
23171	ENSG00000152642	GPD1L	glycerol-3-phosphate dehydrogenase 1 like	2.65381	4.56949	23.4085	5.67029e-09	2.45065e-07	11.4853
163882	ENSG00000162852	CNST	consortin, connexin sorting protein	2.15048	5.95489	23.3992	5.68911e-09	2.45133e-07	11.4198
65125	ENSG00000060237	WNK1	WNK lysine deficient protein kinase 1	3.10295	6.58721	23.3777	5.73277e-09	2.45894e-07	11.4018
7422	ENSG00000112715	VEGFA	vascular endothelial growth factor A	3.13058	8.57779	23.3676	5.7534e-09	2.46115e-07	11.3503
9950	ENSG00000066455	GOLGA5	golgin A5	2.39239	6.13672	23.3641	5.7607e-09	2.46115e-07	11.403
55205	ENSG00000074657	ZNF532	zinc finger protein 532	2.89518	4.59614	23.3625	5.76391e-09	2.46115e-07	11.4705
55818	ENSG00000115548	KDM3A	lysine demethylase 3A	2.85979	5.39449	23.3565	5.77629e-09	2.46273e-07	11.4386
58492	ENSG00000175691	ZNF77	zinc finger protein 77	2.86968	4.13207	23.3492	5.79138e-09	2.46546e-07	11.468
60685	ENSG00000156639	ZFAND3	zinc finger AN1-type containing 3	1.88892	7.38114	23.3391	5.81217e-09	2.466e-07	11.3534
54532	ENSG00000145390	USP53	ubiquitin specific peptidase 53	3.24186	3.75692	23.3307	5.82968e-09	2.466e-07	11.4399
27445	ENSG00000186472	PCLO	piccolo presynaptic cytomatrix protein	3.84798	3.68116	23.3276	5.83606e-09	2.466e-07	11.4045
8850	ENSG00000114166	KAT2B	lysine acetyltransferase 2B	3.68673	3.46162	23.2983	5.89746e-09	2.47388e-07	11.3712
130507	ENSG00000144357	UBR3	ubiquitin protein ligase E3 component n-recognin 3	2.18418	4.96681	23.2801	5.93601e-09	2.48237e-07	11.4181
28962	ENSG00000081087	OSTM1	osteoclastogenesis associated transmembrane protein 1	2.11839	5.06749	23.2714	5.95446e-09	2.48642e-07	11.4094
115548	ENSG00000157107	FCHO2	FCH and mu domain containing endocytic adaptor 2	3.74794	3.58295	23.2616	5.97537e-09	2.49149e-07	11.373
90427	ENSG00000104081	BMF	Bcl2 modifying factor	2.08641	5.14048	23.2412	6.01904e-09	2.49862e-07	11.3944
285636	ENSG00000205765	RIMOC1	RAB7A interacting MON1-CCZ1 complex subunit 1	2.3891	4.65401	23.2306	6.04208e-09	2.49862e-07	11.4154
10427	ENSG00000138802	SEC24B	SEC24 homolog B, COPII coat complex component	2.43784	5.18752	23.2291	6.04534e-09	2.49862e-07	11.3938
23041	ENSG00000061987	MON2	MON2 homolog, regulator of endosome-to-Golgi trafficking	2.17849	5.56791	23.2273	6.0492e-09	2.49862e-07	11.3716
51320	ENSG00000176624	MEX3C	mex-3 RNA binding family member C	2.82117	5.4097	23.2231	6.05832e-09	2.49862e-07	11.3879
9534	ENSG00000213096	ZNF254	zinc finger protein 254	2.56803	4.18718	23.1482	6.22321e-09	2.54948e-07	11.3972
137492	ENSG00000155975	VPS37A	VPS37A subunit of ESCRT-I	2.27005	5.362	23.1327	6.25811e-09	2.54948e-07	11.3469
221079	ENSG00000165997	ARL5B	ADP ribosylation factor like GTPase 5B	2.44147	4.91533	23.0718	6.39692e-09	2.59858e-07	11.3477
121512	ENSG00000139132	FGD4	FYVE, RhoGEF and PH domain containing 4	2.79341	3.84042	23.0655	6.41136e-09	2.60072e-07	11.3619
23198	ENSG00000068878	PSME4	proteasome activator subunit 4	2.03072	6.80719	23.0608	6.42228e-09	2.60143e-07	11.2631
127544	ENSG00000116514	RNF19B	ring finger protein 19B	2.96679	5.10268	23.0483	6.45133e-09	2.60948e-07	11.3394
9044	ENSG00000095564	BTAF1	B-TFIID TATA-box binding protein associated factor 1	2.66493	5.58053	23.0363	6.47933e-09	2.61505e-07	11.3075
79595	ENSG00000136715	SAP130	Sin3A associated protein 130	2.03227	5.50961	23.0252	6.50524e-09	2.62009e-07	11.2961
22928	ENSG00000179918	SEPHS2	selenophosphate synthetase 2	1.91773	7.37813	23.0162	6.52646e-09	2.62109e-07	11.2309
80267	ENSG00000116406	EDEM3	ER degradation enhancing alpha-mannosidase like protein 3	2.57024	4.98836	23.0103	6.54053e-09	2.62109e-07	11.3234
55810	ENSG00000065970	FOXJ2	forkhead box J2	2.63748	4.97706	23.0062	6.55016e-09	2.62109e-07	11.3235
25782	ENSG00000118873	RAB3GAP2	RAB3 GTPase activating non-catalytic protein subunit 2	1.89782	6.55474	23.0044	6.55446e-09	2.62109e-07	11.2477
23329	ENSG00000111490	TBC1D30	TBC1 domain family member 30	2.08504	5.14081	22.9709	6.63442e-09	2.63844e-07	11.2935
51696	ENSG00000112406	HECA	hdc homolog, cell cycle regulator	2.61755	4.47225	22.9535	6.67632e-09	2.64861e-07	11.3222
153241	ENSG00000168944	CEP120	centrosomal protein 120	3.4861	3.66097	22.9525	6.67867e-09	2.64861e-07	11.2916
64784	ENSG00000140577	CRTC3	CREB regulated transcription coactivator 3	1.9654	5.50416	22.9362	6.71832e-09	2.65339e-07	11.2618
8555	ENSG00000081377	CDC14B	cell division cycle 14B	2.97768	3.67819	22.936	6.71875e-09	2.65339e-07	11.3053
9819	ENSG00000196428	TSC22D2	TSC22 domain family member 2	2.57797	4.54804	22.9097	6.78313e-09	2.6751e-07	11.3034
51244	ENSG00000154781	CCDC174	coiled-coil domain containing 174	2.04279	5.52747	22.9053	6.79409e-09	2.6757e-07	11.2502
9262	ENSG00000081320	STK17B	serine/threonine kinase 17b	3.2426	3.38838	22.901	6.80478e-09	2.6762e-07	11.2566
10746	ENSG00000169967	MAP3K2	mitogen-activated protein kinase kinase kinase 2	2.24508	5.27478	22.8763	6.86614e-09	2.68176e-07	11.2542
5783	ENSG00000163629	PTPN13	protein tyrosine phosphatase non-receptor type 13	2.98771	6.06851	22.853	6.92458e-09	2.6932e-07	11.222
51663	ENSG00000056097	ZFR	zinc finger RNA binding protein	1.84595	6.39142	22.8412	6.95422e-09	2.69761e-07	11.1899
29915	ENSG00000111727	HCFC2	host cell factor C2	2.83859	3.74786	22.8175	7.01472e-09	2.71366e-07	11.2698
94134	ENSG00000165322	ARHGAP12	Rho GTPase activating protein 12	2.22389	4.69749	22.8079	7.03909e-09	2.71569e-07	11.255
29966	ENSG00000196792	STRN3	striatin 3	2.15025	4.98335	22.7944	7.07404e-09	2.72072e-07	11.2357
1824	ENSG00000134755	DSC2	desmocollin 2	2.493	5.21699	22.7933	7.07686e-09	2.72072e-07	11.23
9972	ENSG00000124789	NUP153	nucleoporin 153	2.66778	4.92078	22.7858	7.09615e-09	2.72291e-07	11.2442
26033	ENSG00000107518	ATRNL1	attractin like 1	4.66258	2.90086	22.7644	7.15185e-09	2.74058e-07	10.9484
55213	ENSG00000136144	RCBTB1	RCC1 and BTB domain containing protein 1	2.19418	5.01259	22.7562	7.17321e-09	2.74376e-07	11.2205
54906	ENSG00000108021	TASOR2	transcription activation suppressor family member 2	2.36276	6.2822	22.7332	7.23375e-09	2.75729e-07	11.158
135114	ENSG00000111911	HINT3	histidine triad nucleotide binding protein 3	1.93403	5.67874	22.7257	7.25383e-09	2.75733e-07	11.1734
64135	ENSG00000115267	IFIH1	interferon induced with helicase C domain 1	3.845	3.67956	22.7163	7.27877e-09	2.75831e-07	11.198
55589	ENSG00000138756	BMP2K	BMP2 inducible kinase	2.69498	3.97373	22.7159	7.27973e-09	2.75831e-07	11.2406
55773	ENSG00000036054	TBC1D23	TBC1 domain family member 23	2.41366	4.69613	22.7137	7.28555e-09	2.75831e-07	11.2227
85480	ENSG00000145777	TSLP	thymic stromal lymphopoietin	4.76097	2.86039	22.6498	7.45828e-09	2.8054e-07	10.873
81565	ENSG00000166579	NDEL1	nudE neurodevelopment protein 1 like 1	2.09139	5.59886	22.5715	7.67621e-09	2.86208e-07	11.12
54989	ENSG00000198146	ZNF770	zinc finger protein 770	1.84198	6.10534	22.5645	7.6961e-09	2.86208e-07	11.0928
5865	ENSG00000169213	RAB3B	RAB3B, member RAS oncogene family	2.33112	5.26138	22.5628	7.70074e-09	2.86208e-07	11.137
6303	ENSG00000130066	SAT1	spermidine/spermine N1-acetyltransferase 1	2.08027	7.78836	22.5497	7.73802e-09	2.86654e-07	11.0428
3664	ENSG00000117595	IRF6	interferon regulatory factor 6	1.73662	6.80763	22.5486	7.74135e-09	2.86654e-07	11.0629
8780	ENSG00000101782	RIOK3	RIO kinase 3	2.05538	6.3605	22.548	7.74303e-09	2.86654e-07	11.0798
57534	ENSG00000101752	MIB1	MIB E3 ubiquitin protein ligase 1	2.19134	4.904	22.5425	7.75862e-09	2.86857e-07	11.1447
23348	ENSG00000088387	DOCK9	dedicator of cytokinesis 9	3.10132	4.37688	22.4894	7.91229e-09	2.9077e-07	11.1568
23376	ENSG00000014123	UFL1	UFM1 specific ligase 1	2.25499	5.28943	22.4892	7.91283e-09	2.9077e-07	11.1063
64121	ENSG00000116954	RRAGC	Ras related GTP binding C	1.9683	5.5984	22.4804	7.93859e-09	2.9086e-07	11.083
64083	ENSG00000113384	GOLPH3	golgi phosphoprotein 3	1.8215	6.26691	22.4456	8.04145e-09	2.93135e-07	11.0404
4644	ENSG00000197535	MYO5A	myosin VA	1.98978	5.47752	22.4402	8.05779e-09	2.93135e-07	11.0734
9846	ENSG00000033327	GAB2	GRB2 associated binding protein 2	4.58265	3.6421	22.438	8.06435e-09	2.93135e-07	11.051
4214	ENSG00000095015	MAP3K1	mitogen-activated protein kinase kinase kinase 1	3.15046	3.55439	22.4361	8.06992e-09	2.93135e-07	11.1151
60485	ENSG00000151748	SAV1	salvador family WW domain containing protein 1	2.99509	5.21989	22.4299	8.08857e-09	2.93327e-07	11.1013
374354	ENSG00000196865	NHLRC2	NHL repeat containing 2	2.8774	3.86965	22.3958	8.19157e-09	2.95606e-07	11.1213
100131017	ENSG00000205903	ZNF316	zinc finger protein 316	1.9678	6.85262	22.385	8.22434e-09	2.96358e-07	10.9995
1997	ENSG00000120690	ELF1	E74 like ETS transcription factor 1	4.20519	4.2203	22.3729	8.26144e-09	2.9676e-07	11.1058
54793	ENSG00000104756	KCTD9	potassium channel tetramerization domain containing 9	3.00311	4.21521	22.3712	8.26646e-09	2.9676e-07	11.1141
51191	ENSG00000138646	HERC5	HECT and RLD domain containing E3 ubiquitin protein ligase 5	4.31326	2.75089	22.3231	8.41578e-09	2.99968e-07	10.8127
4501	ENSG00000187193	MT1X	metallothionein 1X	3.34561	6.60605	22.3162	8.43759e-09	2.99968e-07	10.9985
3219	ENSG00000170689	HOXB9	homeobox B9	3.12376	3.46201	22.3098	8.4575e-09	2.99968e-07	11.0635
8239	ENSG00000124486	USP9X	ubiquitin specific peptidase 9 X-linked	1.89984	6.84464	22.3019	8.48245e-09	3.00323e-07	10.9663
163859	ENSG00000143751	SDE2	SDE2 telomere maintenance homolog	2.59173	4.25836	22.2957	8.50217e-09	3.00647e-07	11.0829
57669	ENSG00000115109	EPB41L5	erythrocyte membrane protein band 4.1 like 5	2.52597	5.78745	22.2552	8.63172e-09	3.03339e-07	10.9954
6310	ENSG00000124788	ATXN1	ataxin 1	1.9722	5.78811	22.1868	8.85533e-09	3.09516e-07	10.9596
11135	ENSG00000128283	CDC42EP1	CDC42 effector protein 1	2.4031	5.21729	22.1848	8.862e-09	3.09516e-07	10.9948
56913	ENSG00000106392	C1GALT1	core 1 synthase, glycoprotein-N-acetylgalactosamine 3-beta-galactosyltransferase 1	2.64552	4.43483	22.1615	8.93972e-09	3.11464e-07	11.0275
79572	ENSG00000133657	ATP13A3	ATPase 13A3	2.09565	4.98307	22.1562	8.95746e-09	3.117e-07	10.9901
29066	ENSG00000122299	ZC3H7A	zinc finger CCCH-type containing 7A	2.21387	5.32363	22.1389	9.01582e-09	3.12755e-07	10.9673
4090	ENSG00000113658	SMAD5	SMAD family member 5	1.94067	5.34507	22.137	9.02197e-09	3.12755e-07	10.9608
5925	ENSG00000139687	RB1	RB transcriptional corepressor 1	2.78056	4.12995	22.1331	9.03522e-09	3.12755e-07	11.025
9686	ENSG00000144560	VGLL4	vestigial like family member 4	3.09137	5.44466	22.1165	9.09186e-09	3.14067e-07	10.9702
51429	ENSG00000130340	SNX9	sorting nexin 9	2.24503	5.10065	22.0847	9.20118e-09	3.16688e-07	10.9588
135112	ENSG00000111912	NCOA7	nuclear receptor coactivator 7	1.91393	5.36564	22.0746	9.2362e-09	3.17087e-07	10.9347
100132354	ENSG00000289313	LINC01512	long intergenic non-protein coding RNA 1512	3.55942	3.31318	22.0679	9.25951e-09	3.17158e-07	10.9417
23095	ENSG00000054523	KIF1B	kinesin family member 1B	2.01722	6.06796	22.0611	9.28332e-09	3.17549e-07	10.8987
55015	ENSG00000185246	PRPF39	pre-mRNA processing factor 39	2.27816	5.20493	22.0582	9.2933e-09	3.17549e-07	10.9431
84451	ENSG00000143674	MAP3K21	mitogen-activated protein kinase kinase kinase 21	3.59031	3.09004	22.0537	9.30932e-09	3.17714e-07	10.8987
8505	ENSG00000227345	PARG	poly(ADP-ribose) glycohydrolase	2.77297	5.18508	22.0283	9.39882e-09	3.2e-07	10.9427
85462	ENSG00000137460	FHDC1	FH2 domain containing 1	2.49721	4.42852	22.0212	9.42392e-09	3.20427e-07	10.9717
133686	ENSG00000152620	NADK2	NAD kinase 2, mitochondrial	1.70252	6.66143	21.9934	9.52337e-09	3.2276e-07	10.8472
1495	ENSG00000044115	CTNNA1	catenin alpha 1	1.6715	8.91179	21.9881	9.5423e-09	3.22948e-07	10.8019
28999	ENSG00000163884	KLF15	KLF transcription factor 15	2.04489	5.27821	21.9638	9.63058e-09	3.25343e-07	10.8977
3400	ENSG00000172201	ID4	inhibitor of DNA binding 4	6.70208	2.43555	21.9561	9.65872e-09	3.25724e-07	9.93197
23035	ENSG00000040199	PHLPP2	PH domain and leucine rich repeat protein phosphatase 2	3.24974	4.15941	21.9423	9.70907e-09	3.25922e-07	10.9541
79631	ENSG00000140598	EFL1	elongation factor like GTPase 1	1.96838	5.64931	21.907	9.83988e-09	3.28196e-07	10.8551
5775	ENSG00000088179	PTPN4	protein tyrosine phosphatase non-receptor type 4	2.08641	4.81719	21.8914	9.89818e-09	3.29002e-07	10.8952
55322	ENSG00000082213	C5orf22	chromosome 5 open reading frame 22	2.25119	4.98856	21.8892	9.90656e-09	3.29002e-07	10.888
3397	ENSG00000125968	ID1	inhibitor of DNA binding 1	2.99061	3.96353	21.8595	1.00189e-08	3.30688e-07	10.9227
8821	ENSG00000109452	INPP4B	inositol polyphosphate-4-phosphatase type II B	3.76169	3.01088	21.8573	1.00272e-08	3.30688e-07	10.7999
11190	ENSG00000126001	CEP250	centrosomal protein 250	1.85287	7.0899	21.8449	1.00747e-08	3.3176e-07	10.7764
2289	ENSG00000096060	FKBP5	FKBP prolyl isomerase 5	2.33428	4.56592	21.8355	1.01108e-08	3.32048e-07	10.8909
23604	ENSG00000035664	DAPK2	death associated protein kinase 2	2.26387	5.31356	21.8074	1.02196e-08	3.35087e-07	10.8381
6574	ENSG00000144136	SLC20A1	solute carrier family 20 member 1	2.10976	5.44372	21.804	1.02325e-08	3.35124e-07	10.8266
4502	ENSG00000125148	MT2A	metallothionein 2A	2.44868	8.04939	21.7998	1.02492e-08	3.35283e-07	10.7406
2308	ENSG00000150907	FOXO1	forkhead box O1	3.20221	3.42637	21.7967	1.02611e-08	3.35286e-07	10.8731
10611	ENSG00000163110	PDLIM5	PDZ and LIM domain 5	1.81164	5.73685	21.787	1.02994e-08	3.35804e-07	10.8006
57634	ENSG00000183495	EP400	E1A binding protein p400	2.02615	6.33653	21.7866	1.03006e-08	3.35804e-07	10.7785
1778	ENSG00000197102	DYNC1H1	dynein cytoplasmic 1 heavy chain 1	1.80226	9.25433	21.782	1.0319e-08	3.35946e-07	10.7153
27161	ENSG00000123908	AGO2	argonaute RISC catalytic component 2	2.00405	5.93144	21.7795	1.03286e-08	3.35946e-07	10.7916
6520	ENSG00000168003	SLC3A2	solute carrier family 3 member 2	2.02993	9.80737	21.7733	1.0353e-08	3.36353e-07	10.7081
7159	ENSG00000143514	TP53BP2	tumor protein p53 binding protein 2	2.18832	5.70828	21.7477	1.04548e-08	3.39274e-07	10.792
83479	ENSG00000118197	DDX59	DEAD-box helicase 59	2.34938	4.50444	21.7278	1.05347e-08	3.41086e-07	10.852
8916	ENSG00000138641	HERC3	HECT and RLD domain containing E3 ubiquitin protein ligase 3	5.40296	3.51174	21.7208	1.05628e-08	3.41103e-07	10.7
5649	ENSG00000189056	RELN	reelin	4.2213	3.6415	21.6887	1.06934e-08	3.43873e-07	10.8122
5866	ENSG00000167994	RAB3IL1	RAB3A interacting protein like 1	1.98373	5.80987	21.6805	1.07271e-08	3.43937e-07	10.7569
54904	ENSG00000147548	NSD3	nuclear receptor binding SET domain protein 3	2.27803	6.09421	21.6793	1.07317e-08	3.43937e-07	10.748
8638	ENSG00000135114	OASL	2'-5'-oligoadenylate synthetase like	6.46324	2.12439	21.6438	1.08788e-08	3.46303e-07	9.72319
1999	ENSG00000163435	ELF3	E74 like ETS transcription factor 3	1.71428	6.66034	21.6273	1.09478e-08	3.47943e-07	10.6993
23118	ENSG00000055208	TAB2	TGF-beta activated kinase 1 (MAP3K7) binding protein 2	2.79019	5.96042	21.6257	1.09548e-08	3.47943e-07	10.7414
57544	ENSG00000087301	TXNDC16	thioredoxin domain containing 16	2.60819	4.18542	21.6138	1.10048e-08	3.48752e-07	10.8239
22893	ENSG00000140320	BAHD1	bromo adjacent homology domain containing 1	1.81923	5.85965	21.5969	1.10767e-08	3.5064e-07	10.7182
7984	ENSG00000050327	ARHGEF5	Rho guanine nucleotide exchange factor 5	1.94581	5.53734	21.5834	1.11343e-08	3.51809e-07	10.7303
2730	ENSG00000023909	GCLM	glutamate-cysteine ligase modifier subunit	2.07972	5.24199	21.5808	1.11456e-08	3.51809e-07	10.7475
4645	ENSG00000167306	MYO5B	myosin VB	2.08222	5.74909	21.5781	1.11569e-08	3.51809e-07	10.7198
51569	ENSG00000120686	UFM1	ubiquitin fold modifier 1	2.45512	5.29012	21.5438	1.13055e-08	3.54717e-07	10.7373
6787	ENSG00000114904	NEK4	NIMA related kinase 4	2.83823	5.05385	21.5374	1.13333e-08	3.55197e-07	10.7572
5271	ENSG00000166401	SERPINB8	serpin family B member 8	3.54745	2.94286	21.5291	1.13696e-08	3.5538e-07	10.6918
79577	ENSG00000134371	CDC73	cell division cycle 73	2.07129	5.48036	21.5258	1.13842e-08	3.5538e-07	10.712
55791	ENSG00000121931	LRIF1	ligand dependent nuclear receptor interacting factor 1	2.04297	5.2442	21.5252	1.13867e-08	3.5538e-07	10.7242
7051	ENSG00000092295	TGM1	transglutaminase 1	2.63909	4.762	21.5246	1.13892e-08	3.5538e-07	10.765
5494	ENSG00000100614	PPM1A	protein phosphatase, Mg2+/Mn2+ dependent 1A	2.07392	5.77255	21.4976	1.15087e-08	3.58323e-07	10.6857
10163	ENSG00000158195	WASF2	WASP family member 2	2.00213	7.13939	21.4815	1.15806e-08	3.59772e-07	10.628
84280	ENSG00000148925	BTBD10	BTB domain containing 10	2.23909	4.6613	21.4629	1.16638e-08	3.61476e-07	10.7369
9258	ENSG00000147324	MFHAS1	multifunctional ROCO family signaling regulator 1	2.37019	4.7838	21.4608	1.16737e-08	3.61476e-07	10.7322
4780	ENSG00000116044	NFE2L2	NFE2 like bZIP transcription factor 2	1.973	6.09444	21.4565	1.16928e-08	3.61642e-07	10.653
64844	ENSG00000136536	MARCHF7	membrane associated ring-CH-type finger 7	2.00429	5.48648	21.4539	1.17045e-08	3.61642e-07	10.6813
6016	ENSG00000143622	RIT1	Ras like without CAAX 1	2.62633	4.63353	21.4411	1.17629e-08	3.62657e-07	10.7374
6197	ENSG00000177189	RPS6KA3	ribosomal protein S6 kinase A3	2.01168	4.93656	21.4355	1.17884e-08	3.63048e-07	10.7052
9107	ENSG00000139505	MTMR6	myotubularin related protein 6	2.64495	3.85227	21.4161	1.18772e-08	3.64737e-07	10.7532
57700	ENSG00000151553	FHIP2A	FHF complex subunit HOOK interacting protein 2A	2.46638	4.8688	21.4141	1.18867e-08	3.64737e-07	10.7107
359948	ENSG00000168264	IRF2BP2	interferon regulatory factor 2 binding protein 2	1.83191	7.50575	21.4096	1.19074e-08	3.64737e-07	10.5878
4084	ENSG00000059728	MXD1	MAX dimerization protein 1	3.19341	3.48965	21.4037	1.19347e-08	3.65178e-07	10.7333
132671	ENSG00000163071	SPATA18	spermatogenesis associated 18	4.37836	2.77344	21.3965	1.19679e-08	3.65233e-07	10.5149
6772	ENSG00000115415	STAT1	signal transducer and activator of transcription 1	1.81089	5.68943	21.3945	1.1977e-08	3.65233e-07	10.6436
6095	ENSG00000069667	RORA	RAR related orphan receptor A	3.67978	3.61535	21.3913	1.1992e-08	3.65233e-07	10.7211
2802	ENSG00000090615	GOLGA3	golgin A3	1.72969	7.48007	21.3894	1.20008e-08	3.65233e-07	10.5794
149371	ENSG00000116903	EXOC8	exocyst complex component 8	2.4859	3.9847	21.3821	1.20351e-08	3.65886e-07	10.7373
157697	ENSG00000104714	ERICH1	glutamate rich 1	2.30998	6.16206	21.3693	1.20951e-08	3.67316e-07	10.6191
57724	ENSG00000152223	EPG5	ectopic P-granules 5 autophagy tethering factor	2.09128	4.99261	21.3562	1.21566e-08	3.68788e-07	10.6713
5097	ENSG00000156453	PCDH1	protocadherin 1	2.27648	4.24179	21.353	1.21719e-08	3.68861e-07	10.715
84343	ENSG00000163755	HPS3	HPS3 biogenesis of lysosomal organelles complex 2 subunit 1	3.71867	4.14075	21.3364	1.22506e-08	3.7085e-07	10.7222
4301	ENSG00000130396	AFDN	afadin, adherens junction formation factor	1.85714	6.69464	21.3279	1.22911e-08	3.71245e-07	10.5765
126917	ENSG00000169991	IFFO2	intermediate filament family orphan 2	2.63622	3.92201	21.324	1.23099e-08	3.71245e-07	10.7168
8871	ENSG00000078269	SYNJ2	synaptojanin 2	3.27933	4.36645	21.3221	1.23191e-08	3.71245e-07	10.7125
254048	ENSG00000157741	UBN2	ubinuclein 2	2.20329	5.24435	21.3219	1.23197e-08	3.71245e-07	10.6448
114799	ENSG00000141446	ESCO1	establishment of sister chromatid cohesion N-acetyltransferase 1	2.44699	5.01204	21.3187	1.23354e-08	3.71245e-07	10.663
84725	ENSG00000106086	PLEKHA8	pleckstrin homology domain containing A8	2.35775	4.09022	21.3091	1.23814e-08	3.7195e-07	10.7045
5286	ENSG00000011405	PIK3C2A	phosphatidylinositol-4-phosphate 3-kinase catalytic subunit type 2 alpha	2.62641	5.9098	21.2972	1.24387e-08	3.72436e-07	10.6068
23473	ENSG00000131375	CAPN7	calpain 7	2.35491	5.56621	21.2916	1.24661e-08	3.72605e-07	10.6172
8202	ENSG00000124151	NCOA3	nuclear receptor coactivator 3	2.15559	5.0236	21.2858	1.24942e-08	3.72847e-07	10.6422
64750	ENSG00000108854	SMURF2	SMAD specific E3 ubiquitin protein ligase 2	2.32413	4.64538	21.2845	1.25005e-08	3.72847e-07	10.6678
254225	ENSG00000166439	RNF169	ring finger protein 169	3.97168	3.63208	21.2709	1.25671e-08	3.74441e-07	10.6696
7707	ENSG00000163848	ZNF148	zinc finger protein 148	1.90279	5.37473	21.2543	1.26489e-08	3.76088e-07	10.6039
54813	ENSG00000179454	KLHL28	kelch like family member 28	2.66468	4.37807	21.2268	1.27855e-08	3.7896e-07	10.6653
51277	ENSG00000115137	DNAJC27	DnaJ heat shock protein family (Hsp40) member C27	2.80083	3.48841	21.2142	1.28487e-08	3.79826e-07	10.6693
284391	ENSG00000223547	ZNF844	zinc finger protein 844	3.41648	3.42355	21.2122	1.28585e-08	3.79826e-07	10.6484
5583	ENSG00000027075	PRKCH	protein kinase C eta	2.09496	5.4421	21.2103	1.28682e-08	3.79826e-07	10.5859
220	ENSG00000184254	ALDH1A3	aldehyde dehydrogenase 1 family member A3	2.16354	4.95194	21.1971	1.29346e-08	3.80995e-07	10.6106
54557	ENSG00000197860	SGTB	small glutamine rich tetratricopeptide repeat co-chaperone beta	3.58288	4.12189	21.1795	1.30245e-08	3.82601e-07	10.6615
151011	ENSG00000186522	SEPTIN10	septin 10	2.25346	4.21101	21.1222	1.33201e-08	3.89923e-07	10.6237
6541	ENSG00000139514	SLC7A1	solute carrier family 7 member 1	2.71601	6.78398	21.117	1.33477e-08	3.90328e-07	10.4958
202374	ENSG00000169302	STK32A	serine/threonine kinase 32A	3.86918	2.88038	21.1126	1.33709e-08	3.90604e-07	10.5034
1735	ENSG00000197406	DIO3	iodothyronine deiodinase 3	3.75686	2.75303	21.0959	1.34586e-08	3.91955e-07	10.4802
26234	ENSG00000118564	FBXL5	F-box and leucine rich repeat protein 5	1.76598	5.71374	21.0926	1.34765e-08	3.92012e-07	10.5171
23317	ENSG00000138246	DNAJC13	DnaJ heat shock protein family (Hsp40) member C13	2.00669	5.49975	21.0887	1.34967e-08	3.92012e-07	10.5305
23060	ENSG00000180357	ZNF609	zinc finger protein 609	1.75883	6.39362	21.0597	1.36517e-08	3.9551e-07	10.4742
6314	ENSG00000163635	ATXN7	ataxin 7	2.7181	4.67203	21.0574	1.36642e-08	3.9551e-07	10.5829
8334	ENSG00000180573	H2AC6	H2A clustered histone 6	2.97202	4.35327	21.0427	1.37437e-08	3.97406e-07	10.5974
54877	ENSG00000141664	ZCCHC2	zinc finger CCHC-type containing 2	2.19757	4.76038	21.0387	1.37651e-08	3.97619e-07	10.5583
26512	ENSG00000102786	INTS6	integrator complex subunit 6	2.80199	4.09164	21.0317	1.38036e-08	3.98327e-07	10.5993
23369	ENSG00000055917	PUM2	pumilio RNA binding family member 2	1.69703	6.43631	21.0222	1.38551e-08	3.99001e-07	10.4562
3416	ENSG00000119912	IDE	insulin degrading enzyme	2.04072	5.83776	20.994	1.40106e-08	4.02255e-07	10.4741
339745	ENSG00000144228	SPOPL	speckle type BTB/POZ protein like	2.2714	4.47023	20.9866	1.40515e-08	4.03022e-07	10.5558
27154	ENSG00000096070	BRPF3	bromodomain and PHD finger containing 3	4.31291	5.4594	20.9649	1.41728e-08	4.05941e-07	10.5392
7494	ENSG00000100219	XBP1	X-box binding protein 1	2.09978	8.50837	20.9311	1.43634e-08	4.10311e-07	10.3704
23054	ENSG00000198646	NCOA6	nuclear receptor coactivator 6	1.99728	6.06572	20.9275	1.43838e-08	4.10481e-07	10.435
9638	ENSG00000149557	FEZ1	fasciculation and elongation protein zeta 1	5.19955	2.48939	20.914	1.44612e-08	4.11353e-07	10.1054
57512	ENSG00000151025	GPR158	G protein-coupled receptor 158	2.4804	4.05865	20.912	1.44723e-08	4.11353e-07	10.5486
29766	ENSG00000138594	TMOD3	tropomodulin 3	2.00079	5.23528	20.9037	1.45203e-08	4.12303e-07	10.4688
7378	ENSG00000183696	UPP1	uridine phosphorylase 1	2.39272	4.96675	20.8996	1.4544e-08	4.12565e-07	10.4927
6102	ENSG00000102218	RP2	RP2 activator of ARL3 GTPase	3.27124	3.01468	20.8943	1.45746e-08	4.13021e-07	10.4939
55573	ENSG00000091527	CDV3	CDV3 homolog	1.57218	7.21576	20.8813	1.465e-08	4.14744e-07	10.3715
130271	ENSG00000152527	PLEKHH2	pleckstrin homology, MyTH4 and FERM domain containing H2	6.08581	2.23464	20.8757	1.46825e-08	4.15112e-07	9.73494
8301	ENSG00000073921	PICALM	phosphatidylinositol binding clathrin assembly protein	1.81292	6.26781	20.8647	1.47472e-08	4.16249e-07	10.3975
10623	ENSG00000186141	POLR3C	RNA polymerase III subunit C	1.97707	5.83689	20.8609	1.47693e-08	4.16458e-07	10.4173
9881	ENSG00000168016	TRANK1	tetratricopeptide repeat and ankyrin repeat containing 1	4.2756	2.82942	20.8504	1.48313e-08	4.17792e-07	10.3581
9069	ENSG00000157224	CLDN12	claudin 12	1.60729	6.69499	20.8422	1.48793e-08	4.18052e-07	10.3705
11120	ENSG00000112763	BTN2A1	butyrophilin subfamily 2 member A1	2.07135	4.56756	20.8366	1.4913e-08	4.18432e-07	10.4843
23764	ENSG00000185022	MAFF	MAF bZIP transcription factor F	2.88312	3.55691	20.8282	1.49625e-08	4.19409e-07	10.5207
23505	ENSG00000075568	TMEM131	transmembrane protein 131	1.95778	5.5467	20.8246	1.4984e-08	4.19595e-07	10.4167
8295	ENSG00000196367	TRRAP	transformation/transcription domain associated protein	2.25867	6.13204	20.8068	1.50907e-08	4.21312e-07	10.385
23677	ENSG00000130147	SH3BP4	SH3 domain binding protein 4	1.9157	6.17081	20.7979	1.51446e-08	4.21907e-07	10.3746
80208	ENSG00000104133	SPG11	SPG11 vesicle trafficking associated, spatacsin	1.90014	6.61764	20.7924	1.51777e-08	4.22108e-07	10.3549
55604	ENSG00000079691	CARMIL1	capping protein regulator and myosin 1 linker 1	2.14938	4.44743	20.7809	1.52471e-08	4.23129e-07	10.4703
54899	ENSG00000168297	PXK	PX domain containing serine/threonine kinase like	2.46972	4.47293	20.7784	1.52626e-08	4.23129e-07	10.4749
1847	ENSG00000138166	DUSP5	dual specificity phosphatase 5	2.82993	3.43613	20.7765	1.52741e-08	4.23129e-07	10.4979
1362	ENSG00000108582	CPD	carboxypeptidase D	1.75654	5.99806	20.7578	1.53885e-08	4.25467e-07	10.363
5586	ENSG00000065243	PKN2	protein kinase N2	2.11051	4.99385	20.7325	1.55451e-08	4.28713e-07	10.4145
5366	ENSG00000141682	PMAIP1	phorbol-12-myristate-13-acetate-induced protein 1	3.84689	3.75885	20.7257	1.55871e-08	4.29186e-07	10.4721
57092	ENSG00000081154	PCNP	PEST proteolytic signal containing nuclear protein	1.6276	6.63838	20.7239	1.55985e-08	4.29186e-07	10.3222
55435	ENSG00000138660	AP1AR	adaptor related protein complex 1 associated regulatory protein	2.64815	4.11358	20.7153	1.56524e-08	4.30253e-07	10.4694
23382	ENSG00000158467	AHCYL2	adenosylhomocysteinase like 2	2.36814	4.74465	20.7103	1.56837e-08	4.30696e-07	10.4274
9572	ENSG00000126368	NR1D1	nuclear receptor subfamily 1 group D member 1	2.65326	4.5525	20.704	1.57236e-08	4.31194e-07	10.4434
11183	ENSG00000012983	MAP4K5	mitogen-activated protein kinase kinase kinase kinase 5	2.26086	4.81215	20.7002	1.57474e-08	4.31194e-07	10.4169
26036	ENSG00000112200	ZNF451	zinc finger protein 451	2.12929	5.59721	20.6875	1.58279e-08	4.3298e-07	10.3594
55783	ENSG00000180917	CMTR2	cap methyltransferase 2	2.44944	4.54398	20.6839	1.58505e-08	4.33182e-07	10.4312
5573	ENSG00000108946	PRKAR1A	protein kinase cAMP-dependent type I regulatory subunit alpha	1.60629	6.55562	20.674	1.59136e-08	4.34486e-07	10.3035
60684	ENSG00000168538	TRAPPC11	trafficking protein particle complex subunit 11	2.14335	4.51097	20.6642	1.59762e-08	4.35776e-07	10.4179
56704	ENSG00000104369	JPH1	junctophilin 1	2.71963	3.74935	20.6565	1.60257e-08	4.36708e-07	10.4547
3313	ENSG00000113013	HSPA9	heat shock protein family A (Hsp70) member 9	1.49965	9.11725	20.6536	1.60443e-08	4.36796e-07	10.2427
54439	ENSG00000091009	RBM27	RNA binding motif protein 27	1.94866	5.00302	20.6157	1.62901e-08	4.43064e-07	10.3614
9448	ENSG00000071054	MAP4K4	mitogen-activated protein kinase kinase kinase kinase 4	1.62592	6.92756	20.6099	1.63286e-08	4.4339e-07	10.2641
10123	ENSG00000188042	ARL4C	ADP ribosylation factor like GTPase 4C	3.3456	3.26135	20.6068	1.63492e-08	4.4339e-07	10.409
84951	ENSG00000131746	TNS4	tensin 4	4.11172	2.52295	20.5948	1.64282e-08	4.43882e-07	10.2012
54861	ENSG00000163788	SNRK	SNF related kinase	2.47465	3.74202	20.5569	1.6681e-08	4.49389e-07	10.4135
8411	ENSG00000102189	EEA1	early endosome antigen 1	2.56335	4.28997	20.5432	1.67731e-08	4.49741e-07	10.3895
8867	ENSG00000159082	SYNJ1	synaptojanin 1	3.0906	3.20804	20.5426	1.67771e-08	4.49741e-07	10.388
51111	ENSG00000110066	KMT5B	lysine methyltransferase 5B	1.78972	5.38935	20.5424	1.67783e-08	4.49741e-07	10.303
140609	ENSG00000151414	NEK7	NIMA related kinase 7	2.33005	4.53238	20.5403	1.67928e-08	4.49741e-07	10.3698
11143	ENSG00000136504	KAT7	lysine acetyltransferase 7	1.78242	5.48314	20.5279	1.68768e-08	4.5124e-07	10.2914
1182	ENSG00000109572	CLCN3	chloride voltage-gated channel 3	2.35719	7.25528	20.5113	1.69903e-08	4.53421e-07	10.2189
5062	ENSG00000180370	PAK2	p21 (RAC1) activated kinase 2	1.6798	6.65446	20.5024	1.70522e-08	4.54202e-07	10.2271
9404	ENSG00000110031	LPXN	leupaxin	2.31229	4.87878	20.4976	1.70847e-08	4.54202e-07	10.3283
9767	ENSG00000102221	JADE3	jade family PHD finger 3	2.53788	4.15006	20.4956	1.70987e-08	4.54202e-07	10.3759
55754	ENSG00000112697	TMEM30A	transmembrane protein 30A	4.04811	3.99784	20.4955	1.70996e-08	4.54202e-07	10.3884
81607	ENSG00000143217	NECTIN4	nectin cell adhesion molecule 4	2.31696	4.89441	20.4891	1.71436e-08	4.54946e-07	10.3235
55633	ENSG00000065491	TBC1D22B	TBC1 domain family member 22B	2.16185	4.51683	20.4836	1.71823e-08	4.55547e-07	10.3424
8853	ENSG00000151693	ASAP2	ArfGAP with SH3 domain, ankyrin repeat and PH domain 2	2.20571	4.83199	20.4808	1.72017e-08	4.55636e-07	10.3219
26224	ENSG00000005812	FBXL3	F-box and leucine rich repeat protein 3	2.12015	4.45777	20.4732	1.72542e-08	4.56176e-07	10.3412
205717	ENSG00000176542	USF3	upstream transcription factor family member 3	2.33849	4.36197	20.4317	1.75468e-08	4.63048e-07	10.3342
57498	ENSG00000134313	KIDINS220	kinase D interacting substrate 220	2.1797	5.51976	20.4193	1.76359e-08	4.64156e-07	10.2503
158399	ENSG00000173258	ZNF483	zinc finger protein 483	4.0825	2.50225	20.419	1.76378e-08	4.64156e-07	10.1368
160518	ENSG00000170456	DENND5B	DENN domain containing 5B	2.98379	4.55847	20.4142	1.76723e-08	4.64307e-07	10.3314
57600	ENSG00000052795	FNIP2	folliculin interacting protein 2	2.66935	4.48576	20.4136	1.76762e-08	4.64307e-07	10.3269
55103	ENSG00000116191	RALGPS2	Ral GEF with PH domain and SH3 binding motif 2	2.48791	4.33273	20.407	1.77241e-08	4.64705e-07	10.3288
5238	ENSG00000013375	PGM3	phosphoglucomutase 3	1.90123	5.81688	20.3999	1.77748e-08	4.65604e-07	10.2206
23043	ENSG00000154310	TNIK	TRAF2 and NCK interacting kinase	4.01035	2.94356	20.3766	1.79445e-08	4.69184e-07	10.2405
1408	ENSG00000121671	CRY2	cryptochrome circadian regulator 2	1.87022	5.68604	20.3659	1.80227e-08	4.70499e-07	10.2123
51776	ENSG00000091436	MAP3K20	mitogen-activated protein kinase kinase kinase 20	2.14772	4.45549	20.3629	1.80445e-08	4.70499e-07	10.2955
8915	ENSG00000142867	BCL10	BCL10 immune signaling adaptor	2.38976	4.39853	20.3505	1.81358e-08	4.7215e-07	10.2991
57194	ENSG00000206190	ATP10A	ATPase phospholipid transporting 10A (putative)	3.61671	3.65219	20.3498	1.81411e-08	4.7215e-07	10.3246
904	ENSG00000129315	CCNT1	cyclin T1	2.13426	5.36094	20.3407	1.82083e-08	4.73466e-07	10.2252
157680	ENSG00000132549	VPS13B	vacuolar protein sorting 13 homolog B	2.11048	5.03002	20.3314	1.82771e-08	4.74536e-07	10.2422
90102	ENSG00000144824	PHLDB2	pleckstrin homology like domain family B member 2	3.57031	2.9669	20.3272	1.83084e-08	4.74765e-07	10.2571
146050	ENSG00000140265	ZSCAN29	zinc finger and SCAN domain containing 29	1.9431	4.8141	20.3242	1.83308e-08	4.74912e-07	10.25
22902	ENSG00000018189	RUFY3	RUN and FYVE domain containing 3	1.83443	5.34657	20.3176	1.83808e-08	4.75772e-07	10.2101
5795	ENSG00000149177	PTPRJ	protein tyrosine phosphatase receptor type J	2.10731	4.83917	20.3114	1.84267e-08	4.76093e-07	10.247
4293	ENSG00000006432	MAP3K9	mitogen-activated protein kinase kinase kinase 9	2.31817	4.61175	20.2988	1.85217e-08	4.77947e-07	10.2623
57674	ENSG00000173821	RNF213	ring finger protein 213	1.82243	7.2091	20.2919	1.8574e-08	4.78147e-07	10.1198
84256	ENSG00000059122	FLYWCH1	FLYWCH-type zinc finger 1	1.82244	7.01213	20.2898	1.85904e-08	4.78147e-07	10.1246
4200	ENSG00000082212	ME2	malic enzyme 2	2.87479	6.11263	20.2767	1.86898e-08	4.80038e-07	10.1701
51735	ENSG00000158987	RAPGEF6	Rap guanine nucleotide exchange factor 6	2.01858	5.10981	20.2748	1.87046e-08	4.80038e-07	10.2107
4121	ENSG00000111885	MAN1A1	mannosidase alpha class 1A member 1	3.29073	3.75709	20.2584	1.88306e-08	4.82331e-07	10.2942
80110	ENSG00000142556	ZNF614	zinc finger protein 614	2.57995	3.64302	20.2459	1.89266e-08	4.82857e-07	10.2888
26278	ENSG00000151835	SACS	sacsin molecular chaperone	2.15709	4.17878	20.2329	1.90276e-08	4.84129e-07	10.2577
84079	ENSG00000105186	ANKRD27	ankyrin repeat domain 27	1.81253	5.44646	20.2304	1.90469e-08	4.84188e-07	10.166
91	ENSG00000135503	ACVR1B	activin A receptor type 1B	2.22919	5.94917	20.2166	1.91551e-08	4.85634e-07	10.14
3157	ENSG00000112972	HMGCS1	3-hydroxy-3-methylglutaryl-CoA synthase 1	1.73836	5.37399	20.2105	1.92033e-08	4.85992e-07	10.1603
8613	ENSG00000162407	PLPP3	phospholipid phosphatase 3	2.98477	4.05214	20.2102	1.92052e-08	4.85992e-07	10.2685
57683	ENSG00000204186	ZDBF2	zinc finger DBF-type containing 2	3.83266	2.9834	20.2039	1.92548e-08	4.85992e-07	10.1921
57606	ENSG00000109171	SLAIN2	SLAIN motif family member 2	2.8626	5.69263	20.1965	1.93141e-08	4.87055e-07	10.1592
3434	ENSG00000185745	IFIT1	interferon induced protein with tetratricopeptide repeats 1	4.17375	3.13151	20.1927	1.93439e-08	4.87374e-07	10.1863
388403	ENSG00000175155	YPEL2	yippee like 2	2.74653	4.02729	20.1864	1.93941e-08	4.87772e-07	10.2561
51566	ENSG00000102401	ARMCX3	armadillo repeat containing X-linked 3	1.74824	6.13777	20.178	1.94607e-08	4.88581e-07	10.1069
27032	ENSG00000017260	ATP2C1	ATPase secretory pathway Ca2+ transporting 1	1.97737	6.22583	20.1719	1.95094e-08	4.89096e-07	10.1035
54708	ENSG00000198060	MARCHF5	membrane associated ring-CH-type finger 5	1.67994	5.72569	20.1016	2.00822e-08	5.00702e-07	10.0921
56957	ENSG00000264522	OTUD7B	OTU deubiquitinase 7B	2.11266	5.824	20.0873	2.0201e-08	5.03164e-07	10.0879
54790	ENSG00000168769	TET2	tet methylcytosine dioxygenase 2	3.17037	4.24503	20.0824	2.02416e-08	5.03408e-07	10.2107
22930	ENSG00000115839	RAB3GAP1	RAB3 GTPase activating protein catalytic subunit 1	1.8126	6.24935	20.0818	2.02462e-08	5.03408e-07	10.0607
84897	ENSG00000154144	TBRG1	transforming growth factor beta regulator 1	1.61083	6.63882	20.0772	2.02855e-08	5.03942e-07	10.0414
57659	ENSG00000174282	ZBTB4	zinc finger and BTB domain containing 4	1.62571	6.17238	20.0476	2.05345e-08	5.0923e-07	10.0465
26959	ENSG00000105856	HBP1	HMG-box transcription factor 1	2.7303	4.61465	20.0455	2.05521e-08	5.0923e-07	10.1642
9567	ENSG00000100226	GTPBP1	GTP binding protein 1	1.97678	6.72214	20.0428	2.05748e-08	5.09347e-07	10.0272
26750	ENSG00000136643	RPS6KC1	ribosomal protein S6 kinase C1	2.54285	5.1167	20.0331	2.06575e-08	5.09993e-07	10.1184
25998	ENSG00000005700	IBTK	inhibitor of Bruton tyrosine kinase	1.78126	5.56279	20.0314	2.06727e-08	5.09993e-07	10.0719
23231	ENSG00000091490	SEL1L3	SEL1L family member 3	1.71595	6.80138	20.0139	2.08227e-08	5.13246e-07	10.0089
143384	ENSG00000151893	CACUL1	CDK2 associated cullin domain 1	1.89283	5.13643	19.9964	2.09739e-08	5.15632e-07	10.0852
55432	ENSG00000180667	YOD1	YOD1 deubiquitinase	2.05176	4.4946	19.9927	2.10058e-08	5.15656e-07	10.1326
345778	ENSG00000177034	MTX3	metaxin 3	1.89269	5.44296	19.9797	2.11192e-08	5.17512e-07	10.0583
8310	ENSG00000087008	ACOX3	acyl-CoA oxidase 3, pristanoyl	1.85188	4.93498	19.9793	2.11233e-08	5.17512e-07	10.0908
117584	ENSG00000092871	RFFL	ring finger and FYVE like domain containing E3 ubiquitin protein ligase	4.0305	2.44009	19.9747	2.1163e-08	5.17936e-07	9.96809
6450	ENSG00000185437	SH3BGR	SH3 domain binding glutamate rich protein	2.41369	4.51522	19.9672	2.12292e-08	5.18605e-07	10.1301
27443	ENSG00000099954	CECR2	CECR2 histone acetyl-lysine reader	3.85411	2.92776	19.9173	2.16735e-08	5.27352e-07	10.0771
23158	ENSG00000109436	TBC1D9	TBC1 domain family member 9	1.69716	5.61503	19.9114	2.17269e-08	5.2806e-07	10.0147
54454	ENSG00000119778	ATAD2B	ATPase family AAA domain containing 2B	3.03093	3.69451	19.9058	2.17771e-08	5.2841e-07	10.1496
157638	ENSG00000168672	LRATD2	LRAT domain containing 2	1.83062	6.10182	19.9043	2.17914e-08	5.2841e-07	9.98908
26504	ENSG00000158158	CNNM4	cyclin and CBS domain divalent metal cation transport mediator 4	2.51884	5.68028	19.8947	2.18786e-08	5.29817e-07	10.0198
23087	ENSG00000104228	TRIM35	tripartite motif containing 35	2.62737	4.86144	19.8938	2.18868e-08	5.29817e-07	10.0785
51100	ENSG00000097033	SH3GLB1	SH3 domain containing GRB2 like, endophilin B1	1.68212	5.76152	19.8834	2.19813e-08	5.31391e-07	9.99416
5095	ENSG00000175198	PCCA	propionyl-CoA carboxylase subunit alpha	2.21634	4.46362	19.8761	2.20487e-08	5.31507e-07	10.0888
7763	ENSG00000107372	ZFAND5	zinc finger AN1-type containing 5	2.07467	6.99295	19.8727	2.20799e-08	5.31507e-07	9.9435
3310	ENSG00000173110	HSPA6	heat shock protein family A (Hsp70) member 6	2.52223	3.72072	19.8726	2.20809e-08	5.31507e-07	10.132
91369	ENSG00000154945	ANKRD40	ankyrin repeat domain 40	1.82976	5.6383	19.8673	2.21291e-08	5.31507e-07	9.9961
80216	ENSG00000073331	ALPK1	alpha kinase 1	2.75319	4.45899	19.8657	2.21438e-08	5.31507e-07	10.0978
51426	ENSG00000122008	POLK	DNA polymerase kappa	2.75353	4.39009	19.8567	2.22274e-08	5.33063e-07	10.0981
144108	ENSG00000179119	SPTY2D1	SPT2 chromatin protein domain containing 1	2.04242	5.13255	19.8437	2.23483e-08	5.34609e-07	10.0222
905	ENSG00000082258	CCNT2	cyclin T2	2.06928	4.66334	19.8352	2.24276e-08	5.35602e-07	10.0524
54878	ENSG00000074603	DPP8	dipeptidyl peptidase 8	1.93232	5.11165	19.8287	2.24889e-08	5.36468e-07	10.0144
81846	ENSG00000133812	SBF2	SET binding factor 2	2.63778	4.90145	19.8245	2.25284e-08	5.36468e-07	10.0456
4286	ENSG00000187098	MITF	melanocyte inducing transcription factor	2.11131	4.71872	19.8239	2.25332e-08	5.36468e-07	10.0448
55209	ENSG00000168137	SETD5	SET domain containing 5	1.76053	7.85606	19.8139	2.26281e-08	5.375e-07	9.89207
26960	ENSG00000172915	NBEA	neurobeachin	4.25619	2.69254	19.7977	2.27816e-08	5.39969e-07	9.94491
2804	ENSG00000173230	GOLGB1	golgin B1	1.59305	8.12299	19.7948	2.28096e-08	5.40127e-07	9.8777
121536	ENSG00000139154	AEBP2	AE binding protein 2	2.65395	4.51932	19.791	2.28458e-08	5.40127e-07	10.059
9559	ENSG00000122958	VPS26A	VPS26 retromer complex component A	1.7369	6.15416	19.789	2.28643e-08	5.40127e-07	9.93416
23431	ENSG00000081014	AP4E1	adaptor related protein complex 4 subunit epsilon 1	2.5279	3.72105	19.7859	2.28943e-08	5.40152e-07	10.0954
23352	ENSG00000127481	UBR4	ubiquitin protein ligase E3 component n-recognin 4	1.7358	7.53364	19.7825	2.29274e-08	5.40267e-07	9.88484
256302	ENSG00000274180	NATD1	N-acetyltransferase domain containing 1	2.36969	4.92955	19.7723	2.30249e-08	5.41668e-07	10.0133
51496	ENSG00000137770	CTDSPL2	CTD small phosphatase like 2	2.08892	4.57352	19.7546	2.31959e-08	5.44212e-07	10.0243
9931	ENSG00000198265	HELZ	helicase with zinc finger	1.76845	5.21388	19.7532	2.32097e-08	5.44212e-07	9.97032
51646	ENSG00000119801	YPEL5	yippee like 5	1.83467	5.44505	19.7423	2.33164e-08	5.45973e-07	9.95227
222223	ENSG00000164659	ELAPOR2	endosome-lysosome associated apoptosis and autophagy regulator family member 2	1.91866	4.92151	19.73	2.34366e-08	5.48081e-07	9.98368
23063	ENSG00000062650	WAPL	WAPL cohesin release factor	1.89992	4.96853	19.7285	2.34519e-08	5.48081e-07	9.97909
25820	ENSG00000166233	ARIH1	ariadne RBR E3 ubiquitin protein ligase 1	2.15054	6.00635	19.7202	2.35335e-08	5.49535e-07	9.9165
57763	ENSG00000164331	ANKRA2	ankyrin repeat family A member 2	2.1983	4.64044	19.7085	2.36491e-08	5.51328e-07	10.0024
9650	ENSG00000066855	MTFR1	mitochondrial fission regulator 1	1.77627	5.62016	19.7059	2.36746e-08	5.5147e-07	9.9246
3344	ENSG00000170802	FOXN2	forkhead box N2	3.21283	3.23816	19.6884	2.38496e-08	5.54863e-07	10.0473
59338	ENSG00000107679	PLEKHA1	pleckstrin homology domain containing A1	2.46213	4.29653	19.6826	2.39076e-08	5.55529e-07	10.0226
29925	ENSG00000173540	GMPPB	GDP-mannose pyrophosphorylase B	1.66549	5.77821	19.6745	2.39896e-08	5.56523e-07	9.89988
105375039	NA	NA	NA	4.54151	2.57914	19.6684	2.40512e-08	5.56832e-07	9.82942
5621	ENSG00000171867	PRNP	prion protein	2.40668	6.84053	19.668	2.40556e-08	5.56832e-07	9.8609
84444	ENSG00000104885	DOT1L	DOT1 like histone lysine methyltransferase	1.66381	6.69993	19.6659	2.40769e-08	5.56832e-07	9.85632
9321	ENSG00000100815	TRIP11	thyroid hormone receptor interactor 11	1.8765	6.04652	19.6654	2.40813e-08	5.56832e-07	9.88558
51278	ENSG00000162783	IER5	immediate early response 5	3.18225	3.53378	19.6611	2.4125e-08	5.57388e-07	10.0467
57221	ENSG00000112379	ARFGEF3	ARFGEF family member 3	1.73098	8.28359	19.6446	2.42938e-08	5.60634e-07	9.8078
152006	ENSG00000137075	RNF38	ring finger protein 38	2.20202	4.2235	19.6435	2.4305e-08	5.60634e-07	10.0036
401474	ENSG00000177570	SAMD12	sterile alpha motif domain containing 12	2.10652	4.39034	19.634	2.44023e-08	5.62421e-07	9.98511
255394	ENSG00000166046	TCP11L2	t-complex 11 like 2	5.31276	2.93256	19.62	2.45465e-08	5.65163e-07	9.8175
1039	ENSG00000140743	CDR2	cerebellar degeneration related protein 2	2.98535	4.18338	19.6186	2.4561e-08	5.65163e-07	10.0137
283464	ENSG00000151233	GXYLT1	glucoside xylosyltransferase 1	2.50551	4.61672	19.6128	2.46213e-08	5.66092e-07	9.97116
151636	ENSG00000163840	DTX3L	deltex E3 ubiquitin ligase 3L	2.09822	5.19052	19.5965	2.47912e-08	5.68345e-07	9.9101
9554	ENSG00000265808	SEC22B	SEC22 homolog B, vesicle trafficking protein	2.06818	5.80628	19.5941	2.48165e-08	5.68345e-07	9.86914
4122	ENSG00000196547	MAN2A2	mannosidase alpha class 2A member 2	2.32119	6.03426	19.5938	2.48194e-08	5.68345e-07	9.86144
2957	ENSG00000165417	GTF2A1	general transcription factor IIA subunit 1	1.81191	5.32645	19.573	2.50381e-08	5.7105e-07	9.88377
10090	ENSG00000111962	UST	uronyl 2-sulfotransferase	3.56519	3.38937	19.5629	2.51457e-08	5.73043e-07	9.99681
6672	ENSG00000067066	SP100	SP100 nuclear antigen	3.60761	2.90883	19.5602	2.51748e-08	5.73247e-07	9.94833
6549	ENSG00000115616	SLC9A2	solute carrier family 9 member A2	2.11854	4.14893	19.5414	2.53751e-08	5.76422e-07	9.96154
9181	ENSG00000116584	ARHGEF2	Rho/Rac guanine nucleotide exchange factor 2	2.46754	7.1338	19.5228	2.55764e-08	5.80066e-07	9.78574
2669	ENSG00000164949	GEM	GTP binding protein overexpressed in skeletal muscle	8.24169	2.37577	19.5017	2.58061e-08	5.83159e-07	8.7632
54916	ENSG00000070269	TMEM260	transmembrane protein 260	2.00479	4.7023	19.5014	2.58091e-08	5.83159e-07	9.90092
80223	ENSG00000156675	RAB11FIP1	RAB11 family interacting protein 1	1.61738	5.95883	19.4993	2.58318e-08	5.83159e-07	9.81117
84864	ENSG00000170854	RIOX2	ribosomal oxygenase 2	2.45449	5.38439	19.499	2.5836e-08	5.83159e-07	9.86128
1604	ENSG00000196352	CD55	CD55 molecule (Cromer blood group)	2.33554	4.32232	19.4921	2.59113e-08	5.84393e-07	9.93435
11099	ENSG00000070778	PTPN21	protein tyrosine phosphatase non-receptor type 21	4.35145	3.57506	19.4881	2.59555e-08	5.84871e-07	9.95631
8324	ENSG00000155760	FZD7	frizzled class receptor 7	3.21741	2.92107	19.4776	2.60714e-08	5.86109e-07	9.93732
25822	ENSG00000137094	DNAJB5	DnaJ heat shock protein family (Hsp40) member B5	2.18912	3.98444	19.4759	2.60906e-08	5.86109e-07	9.94491
55668	ENSG00000089916	GPATCH2L	G-patch domain containing 2 like	2.04905	5.17239	19.4603	2.62639e-08	5.89107e-07	9.84872
1073	ENSG00000165410	CFL2	cofilin 2	1.83435	4.76085	19.4565	2.63061e-08	5.89553e-07	9.87191
26127	ENSG00000111790	FGFR1OP2	FGFR1 oncogene partner 2	2.38898	4.18322	19.4535	2.63401e-08	5.89847e-07	9.92778
9205	ENSG00000132950	ZMYM5	zinc finger MYM-type containing 5	2.89789	3.8433	19.4422	2.64662e-08	5.92204e-07	9.9493
114818	ENSG00000119771	KLHL29	kelch like family member 29	3.2715	3.72997	19.4363	2.65335e-08	5.92777e-07	9.95261
4649	ENSG00000066933	MYO9A	myosin IXA	1.88172	5.15959	19.4304	2.66004e-08	5.93337e-07	9.83207
25898	ENSG00000163743	RCHY1	ring finger and CHY zinc finger domain containing 1	2.04283	4.83231	19.4262	2.66479e-08	5.9393e-07	9.85822
8428	ENSG00000102572	STK24	serine/threonine kinase 24	2.11731	5.56494	19.4139	2.67871e-08	5.95966e-07	9.80296
23405	ENSG00000100697	DICER1	dicer 1, ribonuclease III	1.66686	5.55821	19.4102	2.68298e-08	5.95966e-07	9.79303
22847	ENSG00000168813	ZNF507	zinc finger protein 507	2.09461	5.08269	19.4094	2.68387e-08	5.95966e-07	9.83382
10495	ENSG00000165675	ENOX2	ecto-NOX disulfide-thiol exchanger 2	2.76522	4.13176	19.4089	2.68442e-08	5.95966e-07	9.91939
55884	ENSG00000176871	WSB2	WD repeat and SOCS box containing 2	1.76409	6.56582	19.375	2.7235e-08	6.03734e-07	9.73026
376940	ENSG00000188177	ZC3H6	zinc finger CCCH-type containing 6	1.94221	5.06817	19.3749	2.72366e-08	6.03734e-07	9.81526
840	ENSG00000165806	CASP7	caspase 7	1.95624	4.58281	19.3715	2.72767e-08	6.03877e-07	9.85051
23301	ENSG00000115504	EHBP1	EH domain binding protein 1	2.39853	3.90409	19.3707	2.72856e-08	6.03877e-07	9.90775
257397	ENSG00000157625	TAB3	TGF-beta activated kinase 1 (MAP3K7) binding protein 3	2.52525	4.56101	19.3625	2.73814e-08	6.04615e-07	9.8639
7760	ENSG00000085644	ZNF213	zinc finger protein 213	1.79319	6.27013	19.3605	2.74047e-08	6.04615e-07	9.73599
7555	ENSG00000169714	CNBP	CCHC-type zinc finger nucleic acid binding protein	1.47017	8.37434	19.3575	2.74395e-08	6.04615e-07	9.67426
51125	ENSG00000147533	GOLGA7	golgin A7	2.02224	5.75135	19.3533	2.74893e-08	6.04615e-07	9.76271
79912	ENSG00000121350	PYROXD1	pyridine nucleotide-disulphide oxidoreductase domain 1	2.1012	4.1526	19.3469	2.75648e-08	6.058e-07	9.87532
4919	ENSG00000185483	ROR1	receptor tyrosine kinase like orphan receptor 1	3.31077	3.74203	19.3315	2.77464e-08	6.0804e-07	9.90809
3398	ENSG00000115738	ID2	inhibitor of DNA binding 2	3.68552	3.03558	19.3292	2.77735e-08	6.0804e-07	9.86994
83891	ENSG00000109762	SNX25	sorting nexin 25	2.07001	4.51781	19.3194	2.78903e-08	6.10128e-07	9.83552
162972	ENSG00000251369	ZNF550	zinc finger protein 550	2.66593	3.87701	19.3051	2.80617e-08	6.12461e-07	9.88493
2729	ENSG00000001084	GCLC	glutamate-cysteine ligase catalytic subunit	1.91131	4.81518	19.2857	2.8296e-08	6.1474e-07	9.79282
11228	ENSG00000123094	RASSF8	Ras association domain family member 8	4.90251	2.28195	19.2786	2.83819e-08	6.16134e-07	9.53676
23122	ENSG00000163539	CLASP2	cytoplasmic linker associated protein 2	1.83159	5.30035	19.2735	2.84443e-08	6.17017e-07	9.75032
7772	ENSG00000278318	ZNF229	zinc finger protein 229	2.87129	3.4223	19.2644	2.85561e-08	6.18969e-07	9.87994
3437	ENSG00000119917	IFIT3	interferon induced protein with tetratricopeptide repeats 3	6.35392	2.43982	19.246	2.87821e-08	6.2232e-07	9.28894
25987	ENSG00000182704	TSKU	tsukushi, small leucine rich proteoglycan	1.58166	5.76553	19.2455	2.87884e-08	6.2232e-07	9.7048
22976	ENSG00000157212	PAXIP1	PAX interacting protein 1	2.93461	3.68717	19.2429	2.88202e-08	6.2232e-07	9.86814
91543	ENSG00000134321	RSAD2	radical S-adenosyl methionine domain containing 2	7.09626	1.67882	19.2386	2.88745e-08	6.23001e-07	8.56052
56204	ENSG00000047346	ATOSA	atos homolog A	2.05461	5.63957	19.2369	2.88957e-08	6.23001e-07	9.71652
5784	ENSG00000152104	PTPN14	protein tyrosine phosphatase non-receptor type 14	1.93282	4.62592	19.2068	2.92712e-08	6.30619e-07	9.77255
65981	ENSG00000110888	CAPRIN2	caprin family member 2	1.82546	5.44557	19.2011	2.93431e-08	6.31209e-07	9.70755
51752	ENSG00000164307	ERAP1	endoplasmic reticulum aminopeptidase 1	2.68755	4.16093	19.1988	2.93731e-08	6.31377e-07	9.82326
84542	ENSG00000162929	SANBR	SANT and BTB domain regulator of CSR	2.64675	3.47934	19.1901	2.94829e-08	6.32882e-07	9.84715
55197	ENSG00000141425	RPRD1A	regulation of nuclear pre-mRNA domain containing 1A	1.59124	5.96376	19.1864	2.95297e-08	6.32882e-07	9.66759
956	ENSG00000168032	ENTPD3	ectonucleoside triphosphate diphosphohydrolase 3	3.22355	2.99916	19.1718	2.97158e-08	6.35354e-07	9.81958
158586	ENSG00000198455	ZXDB	zinc finger X-linked duplicated B	2.82566	4.28226	19.1691	2.97508e-08	6.35354e-07	9.8069
9263	ENSG00000164543	STK17A	serine/threonine kinase 17a	1.9308	4.55374	19.1686	2.97568e-08	6.35354e-07	9.7608
25976	ENSG00000163659	TIPARP	TCDD inducible poly(ADP-ribose) polymerase	2.81059	3.08378	19.1663	2.97867e-08	6.35354e-07	9.83204
54834	ENSG00000196505	GDAP2	ganglioside induced differentiation associated protein 2	1.9544	4.52175	19.1533	2.99547e-08	6.38082e-07	9.75702
10525	ENSG00000149428	HYOU1	hypoxia up-regulated 1	1.40581	8.80675	19.1335	3.02117e-08	6.42593e-07	9.56446
79982	ENSG00000164031	DNAJB14	DnaJ heat shock protein family (Hsp40) member B14	2.04155	4.47448	19.1308	3.02472e-08	6.42867e-07	9.75288
23012	ENSG00000211455	STK38L	serine/threonine kinase 38 like	1.8032	4.81057	19.112	3.04932e-08	6.4761e-07	9.71175
2263	ENSG00000066468	FGFR2	fibroblast growth factor receptor 2	5.1666	1.97823	19.1051	3.05855e-08	6.4866e-07	9.28954
219333	ENSG00000152484	USP12	ubiquitin specific peptidase 12	2.83865	3.36052	19.0991	3.06647e-08	6.49795e-07	9.809
55870	ENSG00000116539	ASH1L	ASH1 like histone lysine methyltransferase	2.63938	6.27113	19.0934	3.07401e-08	6.50906e-07	9.62671
5569	ENSG00000171033	PKIA	cAMP-dependent protein kinase inhibitor alpha	4.52086	2.17938	19.0891	3.07971e-08	6.51624e-07	9.49398
23279	ENSG00000030066	NUP160	nucleoporin 160	1.8644	4.67197	19.0828	3.08815e-08	6.51956e-07	9.71103
246175	ENSG00000138767	CNOT6L	CCR4-NOT transcription complex subunit 6 like	2.03663	4.21638	19.0798	3.09222e-08	6.5233e-07	9.74964
5594	ENSG00000100030	MAPK1/ERK	mitogen-activated protein kinase 1	2.13605	6.72408	19.0727	3.10168e-08	6.53565e-07	9.58927
54431	ENSG00000077232	DNAJC10	DnaJ heat shock protein family (Hsp40) member C10	1.52706	6.66783	19.072	3.10268e-08	6.53565e-07	9.58404
26263	ENSG00000167196	FBXO22	F-box protein 22	2.15805	4.84081	19.0676	3.10855e-08	6.53831e-07	9.69835
8878	ENSG00000161011	SQSTM1	sequestosome 1	1.41741	9.4644	19.0535	3.12756e-08	6.56858e-07	9.52046
57579	ENSG00000082269	FAM135A	family with sequence similarity 135 member A	3.80874	3.03822	19.0427	3.14227e-08	6.59458e-07	9.74781
116068	ENSG00000176018	LYSMD3	LysM domain containing 3	3.72019	4.50236	19.0391	3.1473e-08	6.60027e-07	9.75761
27309	ENSG00000109445	ZNF330	zinc finger protein 330	1.96415	4.48553	19.0364	3.15089e-08	6.60292e-07	9.70753
64376	ENSG00000095574	IKZF5	IKAROS family zinc finger 5	2.27145	3.93543	19.0284	3.16182e-08	6.61119e-07	9.75165
140809	ENSG00000271303	SRXN1	sulfiredoxin 1	1.63122	7.056	19.0117	3.18489e-08	6.6421e-07	9.54377
11342	ENSG00000082996	RNF13	ring finger protein 13	1.78939	4.91388	19.0109	3.18596e-08	6.6421e-07	9.657
23710	ENSG00000139112	GABARAPL1	GABA type A receptor associated protein like 1	2.20688	6.63808	18.9931	3.21077e-08	6.684e-07	9.55651
171586	ENSG00000158201	ABHD3	abhydrolase domain containing 3, phospholipase	2.14817	4.50555	18.9877	3.21835e-08	6.6914e-07	9.68917
23244	ENSG00000121892	PDS5A	PDS5 cohesin associated factor A	1.51676	6.60902	18.9855	3.22139e-08	6.6914e-07	9.54576
9698	ENSG00000134644	PUM1	pumilio RNA binding family member 1	1.52289	6.88396	18.9753	3.23581e-08	6.71644e-07	9.53131
472	ENSG00000149311	ATM	ATM serine/threonine kinase	2.5993	5.45402	18.9694	3.24403e-08	6.72612e-07	9.61881
84142	ENSG00000163322	ABRAXAS1	abraxas 1, BRCA1 A complex subunit	2.69002	3.29236	18.9617	3.25494e-08	6.74135e-07	9.74969
80829	ENSG00000186660	ZFP91	ZFP91 zinc finger protein, atypical E3 ubiquitin ligase	2.08965	5.93767	18.9591	3.25863e-08	6.7436e-07	9.57159
6643	ENSG00000205302	SNX2	sorting nexin 2	1.55214	6.29292	18.9576	3.26077e-08	6.7436e-07	9.5458
2632	ENSG00000114480	GBE1	1,4-alpha-glucan branching enzyme 1	2.84016	4.78962	18.9464	3.27672e-08	6.75717e-07	9.66787
23011	ENSG00000080371	RAB21	RAB21, member RAS oncogene family	1.73546	5.43708	18.9463	3.27685e-08	6.75717e-07	9.58879
57403	ENSG00000124209	RAB22A	RAB22A, member RAS oncogene family	1.64697	5.25837	18.9393	3.28695e-08	6.76816e-07	9.59567
22931	ENSG00000099246	RAB18	RAB18, member RAS oncogene family	1.54893	6.4905	18.9272	3.30432e-08	6.79713e-07	9.52344
23175	ENSG00000134324	LPIN1	lipin 1	1.68396	5.75712	18.9135	3.32415e-08	6.80594e-07	9.55328
9411	ENSG00000137962	ARHGAP29	Rho GTPase activating protein 29	2.84873	5.53465	18.9116	3.32687e-08	6.80594e-07	9.5932
1386	ENSG00000115966	ATF2	activating transcription factor 2	1.99549	4.7999	18.9025	3.34016e-08	6.8191e-07	9.62169
160760	ENSG00000196850	PPTC7	protein phosphatase targeting COQ7	2.10803	4.57913	18.8811	3.37155e-08	6.87455e-07	9.63258
84333	ENSG00000180628	PCGF5	polycomb group ring finger 5	2.57087	4.76667	18.8805	3.37251e-08	6.87455e-07	9.63239
4591	ENSG00000108395	TRIM37	tripartite motif containing 37	2.07163	4.76394	18.8785	3.37541e-08	6.87552e-07	9.61537
10957	ENSG00000146278	PNRC1	proline rich nuclear receptor coactivator 1	1.70351	5.22573	18.864	3.39696e-08	6.90732e-07	9.56404
22926	ENSG00000118217	ATF6	activating transcription factor 6	1.65241	6.45982	18.8614	3.40075e-08	6.90732e-07	9.4949
5578	ENSG00000154229	PRKCA	protein kinase C alpha	2.73109	4.11066	18.8594	3.40384e-08	6.90866e-07	9.67555
51185	ENSG00000113851	CRBN	cereblon	1.70111	5.6433	18.8534	3.4128e-08	6.92189e-07	9.53202
57198	ENSG00000143515	ATP8B2	ATPase phospholipid transporting 8B2	2.20385	4.73854	18.8512	3.41597e-08	6.92338e-07	9.60852
100652748	ENSG00000204152	TIMM23B	translocase of inner mitochondrial membrane 23 homolog B	2.22806	3.85487	18.8469	3.42247e-08	6.92528e-07	9.67439
23657	ENSG00000151012	SLC7A11	solute carrier family 7 member 11	1.61174	7.00765	18.8457	3.42423e-08	6.92528e-07	9.46721
51582	ENSG00000155096	AZIN1	antizyme inhibitor 1	1.96362	6.89594	18.8386	3.43487e-08	6.938e-07	9.47127
54764	ENSG00000019995	ZRANB1	zinc finger RANBP2-type containing 1	2.49215	5.82763	18.8373	3.43686e-08	6.938e-07	9.52954
9712	ENSG00000148429	USP6NL	USP6 N-terminal like	2.7479	3.9957	18.8367	3.43785e-08	6.938e-07	9.67285
9852	ENSG00000178567	EPM2AIP1	EPM2A interacting protein 1	2.25133	3.79264	18.8209	3.46172e-08	6.98122e-07	9.66688
55667	ENSG00000137145	DENND4C	DENN domain containing 4C	1.65214	5.53658	18.8156	3.46974e-08	6.99243e-07	9.52004
3267	ENSG00000173744	AGFG1	ArfGAP with FG repeats 1	2.2234	5.28147	18.8046	3.48664e-08	7.01652e-07	9.54469
2121	ENSG00000072840	EVC	EvC ciliary complex subunit 1	2.60764	4.03258	18.7989	3.49538e-08	7.0285e-07	9.65015
3140	ENSG00000153029	MR1	major histocompatibility complex, class I-related	1.9375	4.28892	18.7974	3.49763e-08	7.0285e-07	9.61306
29843	ENSG00000079387	SENP1	SUMO specific peptidase 1	2.28448	4.06691	18.7947	3.50174e-08	7.0285e-07	9.63847
6671	ENSG00000105866	SP4	Sp4 transcription factor	2.62037	3.96158	18.7903	3.50852e-08	7.0285e-07	9.65188
22885	ENSG00000173210	ABLIM3	actin binding LIM protein family member 3	4.34368	2.42083	18.7895	3.50978e-08	7.0285e-07	9.48049
283554	ENSG00000180998	GPR137C	G protein-coupled receptor 137C	3.96759	2.72039	18.7884	3.51152e-08	7.0285e-07	9.58392
10124	ENSG00000122644	ARL4A	ADP ribosylation factor like GTPase 4A	2.76313	3.18556	18.7878	3.51239e-08	7.0285e-07	9.67315
54704	ENSG00000164951	PDP1	pyruvate dehydrogenase phosphatase catalytic subunit 1	2.36577	3.72511	18.7861	3.51511e-08	7.02898e-07	9.65736
7750	ENSG00000121741	ZMYM2	zinc finger MYM-type containing 2	2.07199	5.74752	18.7805	3.52364e-08	7.04108e-07	9.49866
8844	ENSG00000141068	KSR1	kinase suppressor of ras 1	5.34534	2.18605	18.7696	3.54064e-08	7.06437e-07	9.22393
26994	ENSG00000123091	RNF11	ring finger protein 11	1.8297	6.97157	18.7618	3.55276e-08	7.07438e-07	9.43098
54617	ENSG00000128908	INO80	INO80 complex ATPase subunit	1.63534	5.67398	18.7528	3.56692e-08	7.08766e-07	9.48189
79872	ENSG00000105879	CBLL1	Cbl proto-oncogene like 1	1.919	4.4253	18.7326	3.59882e-08	7.13108e-07	9.57162
5504	ENSG00000184203	PPP1R2	protein phosphatase 1 regulatory inhibitor subunit 2	1.72319	5.65405	18.7273	3.60719e-08	7.1377e-07	9.47265
10771	ENSG00000015171	ZMYND11	zinc finger MYND-type containing 11	2.04578	6.35841	18.7243	3.61195e-08	7.1377e-07	9.43973
63976	ENSG00000142611	PRDM16	PR/SET domain 16	8.00032	1.92263	18.7192	3.6202e-08	7.1377e-07	8.2826
122830	ENSG00000139977	NAA30	N-alpha-acetyltransferase 30, NatC catalytic subunit	1.79391	4.73813	18.7181	3.62196e-08	7.1377e-07	9.53548
7008	ENSG00000167074	TEF	TEF transcription factor, PAR bZIP family member	1.72827	5.12659	18.7133	3.62961e-08	7.1377e-07	9.50125
5610	ENSG00000055332	EIF2AK2	eukaryotic translation initiation factor 2 alpha kinase 2	2.13591	3.99378	18.7128	3.6304e-08	7.1377e-07	9.60182
9912	ENSG00000006740	ARHGAP44	Rho GTPase activating protein 44	3.02863	4.99332	18.7116	3.63232e-08	7.1377e-07	9.54917
8445	ENSG00000127334	DYRK2	dual specificity tyrosine phosphorylation regulated kinase 2	3.05648	2.98599	18.6993	3.65204e-08	7.16157e-07	9.62393
11059	ENSG00000123124	WWP1	WW domain containing E3 ubiquitin protein ligase 1	3.1375	5.70594	18.6941	3.66055e-08	7.17204e-07	9.48773
3899	ENSG00000144218	AFF3	ALF transcription elongation factor 3	2.96838	3.54615	18.6821	3.67989e-08	7.19631e-07	9.6256
22800	ENSG00000133818	RRAS2	RAS related 2	1.65768	5.27559	18.6602	3.71584e-08	7.24665e-07	9.46422
5255	ENSG00000067177	PHKA1	phosphorylase kinase regulatory subunit alpha 1	1.6788	5.20261	18.6529	3.72788e-08	7.26015e-07	9.46626
157922	ENSG00000130559	CAMSAP1	calmodulin regulated spectrin associated protein 1	2.50735	6.20373	18.641	3.74746e-08	7.29329e-07	9.41563
147991	ENSG00000178904	DPY19L3	dpy-19 like C-mannosyltransferase 3	1.73045	5.17795	18.628	3.7691e-08	7.31535e-07	9.4574
9765	ENSG00000039319	ZFYVE16	zinc finger FYVE-type containing 16	1.69457	5.56928	18.6211	3.78066e-08	7.33278e-07	9.42714
200030	ENSG00000263956	NBPF11	NBPF member 11	2.35922	5.14431	18.6157	3.78979e-08	7.34547e-07	9.47042
92255	ENSG00000164187	LMBRD2	LMBR1 domain containing 2	1.88477	4.37178	18.61	3.79926e-08	7.35379e-07	9.51814
10640	ENSG00000070367	EXOC5	exocyst complex component 5	1.58274	5.43283	18.5955	3.82394e-08	7.38143e-07	9.42156
55196	ENSG00000174718	RESF1	retroelement silencing factor 1	2.05717	4.15847	18.5809	3.84874e-08	7.41418e-07	9.5269
340485	ENSG00000177076	ACER2	alkaline ceramidase 2	4.88452	2.22466	18.577	3.8554e-08	7.42166e-07	9.26407
10810	ENSG00000132970	WASF3	WASP family member 3	2.37586	4.20574	18.5752	3.85858e-08	7.42166e-07	9.52928
30001	ENSG00000197930	ERO1A	endoplasmic reticulum oxidoreductase 1 alpha	2.39978	4.65735	18.5741	3.86046e-08	7.42166e-07	9.49249
999	ENSG00000039068	CDH1	cadherin 1	1.52486	8.25063	18.5676	3.87162e-08	7.43807e-07	9.30494
7421	ENSG00000111424	VDR	vitamin D receptor	2.06967	4.49923	18.5501	3.90178e-08	7.48083e-07	9.48489
63908	ENSG00000125814	NAPB	NSF attachment protein beta	1.8799	4.33494	18.5464	3.90825e-08	7.48817e-07	9.49136
170691	ENSG00000140470	ADAMTS17	ADAM metallopeptidase with thrombospondin type 1 motif 17	2.60794	3.20111	18.5446	3.91136e-08	7.48909e-07	9.56693
8496	ENSG00000110841	PPFIBP1	PPFIA binding protein 1	1.76453	4.91611	18.5407	3.91827e-08	7.49002e-07	9.43698
27250	ENSG00000150593	PDCD4	programmed cell death 4	1.48079	6.17112	18.5403	3.91883e-08	7.49002e-07	9.35309
167227	ENSG00000172795	DCP2	decapping mRNA 2	1.57619	5.54591	18.5369	3.92484e-08	7.49468e-07	9.38637
9372	ENSG00000157077	ZFYVE9	zinc finger FYVE-type containing 9	2.05666	5.47243	18.5244	3.94667e-08	7.53129e-07	9.395
375743	ENSG00000188647	PTAR1	protein prenyltransferase alpha subunit repeat containing 1	2.1401	4.8403	18.5179	3.95813e-08	7.54304e-07	9.4438
23235	ENSG00000170145	SIK2	salt inducible kinase 2	2.28693	4.72074	18.5129	3.96697e-08	7.5548e-07	9.4549
5218	ENSG00000058091	CDK14	cyclin dependent kinase 14	1.69227	5.57128	18.5112	3.97002e-08	7.55555e-07	9.37461
23092	ENSG00000145819	ARHGAP26	Rho GTPase activating protein 26	1.96724	5.03195	18.5092	3.97351e-08	7.55712e-07	9.41808
1027	ENSG00000111276	CDKN1B	cyclin dependent kinase inhibitor 1B	1.88572	6.10844	18.5002	3.98951e-08	7.5808e-07	9.34257
8660	ENSG00000185950	IRS2	insulin receptor substrate 2	3.75611	3.72445	18.485	4.01679e-08	7.62083e-07	9.54016
56916	ENSG00000163104	SMARCAD1	SWI/SNF-related, matrix-associated actin-dependent regulator of chromatin, subfamily a, containing DEAD/H box 1	1.81619	4.59418	18.4833	4.0198e-08	7.62083e-07	9.43791
10483	ENSG00000101310	SEC23B	SEC23 homolog B, COPII coat complex component	1.7079	7.45607	18.479	4.02749e-08	7.62083e-07	9.2801
93082	ENSG00000163121	NEURL3	neuralized E3 ubiquitin protein ligase 3	4.78563	2.11347	18.4766	4.03189e-08	7.62221e-07	9.20457
3658	ENSG00000136381	IREB2	iron responsive element binding protein 2	1.58758	5.40126	18.4715	4.04097e-08	7.63428e-07	9.36484
26009	ENSG00000036549	ZZZ3	zinc finger ZZ-type containing 3	2.29688	5.88212	18.4673	4.04856e-08	7.64355e-07	9.34677
55312	ENSG00000135002	RFK	riboflavin kinase	2.22177	4.94242	18.4517	4.07689e-08	7.6817e-07	9.40649
283349	ENSG00000153179	RASSF3	Ras association domain family member 3	1.60903	7.25825	18.4474	4.08475e-08	7.69141e-07	9.26951
7844	ENSG00000239305	RNF103	ring finger protein 103	1.62807	5.45645	18.4433	4.09225e-08	7.70042e-07	9.34851
4928	ENSG00000110713	NUP98	nucleoporin 98 and 96 precursor	1.67906	7.14715	18.4318	4.11339e-08	7.73509e-07	9.26594
23332	ENSG00000074054	CLASP1	cytoplasmic linker associated protein 1	1.71829	5.36376	18.4284	4.11971e-08	7.74185e-07	9.34929
6789	ENSG00000101109	STK4	serine/threonine kinase 4	1.8242	4.53736	18.424	4.12779e-08	7.74592e-07	9.41522
51631	ENSG00000146963	LUC7L2	LUC7 like 2, pre-mRNA splicing factor	2.9518	3.12298	18.424	4.12783e-08	7.74592e-07	9.51127
23022	ENSG00000129116	PALLD	palladin, cytoskeletal associated protein	2.97059	5.55153	18.4165	4.14164e-08	7.75738e-07	9.36275
102723356	NA	ZFPM2-AS1	ZFPM2 antisense RNA 1	2.01821	4.3876	18.4123	4.14943e-08	7.76684e-07	9.42868
158747	ENSG00000130150	MOSPD2	motile sperm domain containing 2	2.70583	3.58887	18.4063	4.16076e-08	7.77779e-07	9.49742
84455	ENSG00000203965	EFCAB7	EF-hand calcium binding domain 7	2.36758	4.30124	18.3986	4.17505e-08	7.79937e-07	9.43936
9652	ENSG00000198677	SKIC3	SKI3 subunit of superkiller complex	1.81973	5.39766	18.3895	4.19211e-08	7.82567e-07	9.3304
79685	ENSG00000164576	SAP30L	SAP30 like	1.91261	5.03094	18.3761	4.21739e-08	7.85779e-07	9.35403
54884	ENSG00000042445	RETSAT	retinol saturase	1.52141	6.48076	18.373	4.22325e-08	7.86355e-07	9.25977
27	ENSG00000143322	ABL2	ABL proto-oncogene 2, non-receptor tyrosine kinase	1.6337	5.12845	18.3634	4.24163e-08	7.89009e-07	9.3332
51306	ENSG00000031003	FAM13B	family with sequence similarity 13 member B	1.70668	4.96616	18.3566	4.25465e-08	7.89009e-07	9.34411
4306	ENSG00000151623	NR3C2	nuclear receptor subfamily 3 group C member 2	2.21986	3.88268	18.3565	4.25476e-08	7.89009e-07	9.44784
5130	ENSG00000161217	PCYT1A	phosphate cytidylyltransferase 1A, choline	1.88051	4.72878	18.3538	4.25998e-08	7.89055e-07	9.36693
6832	ENSG00000156502	SUPV3L1	Suv3 like RNA helicase	1.58233	6.61977	18.3491	4.26891e-08	7.90193e-07	9.24336
5604	ENSG00000169032	MAP2K1	mitogen-activated protein kinase kinase 1	1.47827	6.1031	18.3463	4.27436e-08	7.90687e-07	9.26299
23387	ENSG00000160584	SIK3	SIK family kinase 3	2.00929	4.52543	18.3353	4.29544e-08	7.93552e-07	9.37981
55930	ENSG00000128833	MYO5C	myosin VC	1.73227	5.40739	18.3269	4.31181e-08	7.95025e-07	9.29783
285527	ENSG00000075539	FRYL	FRY like transcription coactivator	1.89437	4.76583	18.3157	4.33366e-08	7.96984e-07	9.34597
2332	ENSG00000102081	FMR1	fragile X messenger ribonucleoprotein 1	2.00501	4.41569	18.3052	4.35423e-08	7.99292e-07	9.37453
79571	ENSG00000179562	GCC1	GRIP and coiled-coil domain containing 1	1.63844	5.05747	18.3049	4.35473e-08	7.99292e-07	9.31067
283489	ENSG00000198824	CHAMP1	chromosome alignment maintaining phosphoprotein 1	2.46858	4.20196	18.2966	4.37103e-08	7.99792e-07	9.40278
157695	ENSG00000180190	TDRP	testis development related protein	1.49981	5.91616	18.2896	4.38497e-08	8.00714e-07	9.24527
168620	ENSG00000180535	BHLHA15	basic helix-loop-helix family member a15	4.02427	3.12843	18.2736	4.41666e-08	8.05003e-07	9.42283
114876	ENSG00000141447	OSBPL1A	oxysterol binding protein like 1A	2.20888	4.74182	18.2377	4.48896e-08	8.15416e-07	9.32025
54765	ENSG00000166326	TRIM44	tripartite motif containing 44	1.62418	6.80389	18.2331	4.49834e-08	8.15416e-07	9.18046
23462	ENSG00000164683	HEY1	hes related family bHLH transcription factor with YRPW motif 1	6.25317	1.62039	18.2317	4.50099e-08	8.15416e-07	8.51701
54467	ENSG00000001629	ANKIB1	ankyrin repeat and IBR domain containing 1	2.28104	5.07681	18.2242	4.51649e-08	8.15416e-07	9.28742
10018	ENSG00000153094	BCL2L11	BCL2 like 11	1.73793	5.01922	18.2241	4.51658e-08	8.15416e-07	9.27723
23516	ENSG00000104635	SLC39A14	solute carrier family 39 member 14	1.65766	6.1117	18.2238	4.51717e-08	8.15416e-07	9.20567
81573	ENSG00000118454	ANKRD13C	ankyrin repeat domain 13C	1.79268	4.83595	18.2219	4.52104e-08	8.15597e-07	9.29278
7533	ENSG00000128245	YWHAH	tyrosine 3-monooxygenase/tryptophan 5-monooxygenase activation protein eta	1.52138	6.0215	18.2044	4.5571e-08	8.20538e-07	9.19888
51804	ENSG00000100625	SIX4	SIX homeobox 4	2.08827	3.90087	18.1968	4.57284e-08	8.2233e-07	9.36869
10818	ENSG00000166225	FRS2	fibroblast growth factor receptor substrate 2	2.15427	4.31545	18.1598	4.65023e-08	8.35189e-07	9.31873
197320	ENSG00000170100	ZNF778	zinc finger protein 778	1.72676	5.13881	18.1525	4.66566e-08	8.37052e-07	9.23326
11196	ENSG00000107651	SEC23IP	SEC23 interacting protein	1.92921	5.80156	18.1506	4.66964e-08	8.37086e-07	9.19133
401548	ENSG00000148158	SNX30	sorting nexin family member 30	2.10047	3.97896	18.1492	4.67269e-08	8.37105e-07	9.34065
65124	ENSG00000198142	SOWAHC	sosondowah ankyrin repeat domain family member C	2.14019	3.83191	18.1313	4.71078e-08	8.43395e-07	9.34391
8500	ENSG00000131626	PPFIA1	PTPRF interacting protein alpha 1	1.80238	6.11718	18.1197	4.73575e-08	8.46389e-07	9.15678
2744	ENSG00000115419	GLS	glutaminase	1.69815	4.99381	18.1194	4.73644e-08	8.46389e-07	9.22781
6386	ENSG00000137575	SDCBP	syndecan binding protein	1.44181	6.32788	18.1109	4.75485e-08	8.48545e-07	9.13774
10735	ENSG00000101972	STAG2	STAG2 cohesin complex component	1.69892	6.63877	18.1083	4.76046e-08	8.48545e-07	9.12653
1491	ENSG00000116761	CTH	cystathionine gamma-lyase	1.94576	4.55897	18.1038	4.77028e-08	8.49275e-07	9.26396
22882	ENSG00000178764	ZHX2	zinc fingers and homeoboxes 2	1.76943	5.44349	18.1033	4.77119e-08	8.49275e-07	9.18796
23078	ENSG00000102763	VWA8	von Willebrand factor A domain containing 8	1.93493	4.10795	18.0892	4.80196e-08	8.53799e-07	9.2967
3017	ENSG00000158373	H2BC5	H2B clustered histone 5	2.11476	3.90472	18.0852	4.81084e-08	8.54307e-07	9.31609
8650	ENSG00000133961	NUMB	NUMB endocytic adaptor protein	2.02284	5.67566	18.0749	4.83351e-08	8.56634e-07	9.16407
51762	ENSG00000166128	RAB8B	RAB8B, member RAS oncogene family	1.85251	4.27896	18.0629	4.86003e-08	8.60352e-07	9.26668
55088	ENSG00000165813	CCDC186	coiled-coil domain containing 186	1.73224	5.72171	18.0496	4.88961e-08	8.64512e-07	9.1431
3491	ENSG00000142871	CCN1	cellular communication network factor 1	2.04324	3.94938	18.0417	4.90727e-08	8.67093e-07	9.28996
80830	ENSG00000221963	APOL6	apolipoprotein L6	4.29847	2.09056	18.0353	4.92158e-08	8.68001e-07	9.10362
51101	ENSG00000104427	ZC2HC1A	zinc finger C2HC-type containing 1A	2.66923	3.3758	18.0311	4.93108e-08	8.68616e-07	9.33213
158160	ENSG00000290439	HSD17B7P2	hydroxysteroid 17-beta dehydrogenase 7 pseudogene 2	2.04712	3.92293	18.0311	4.93118e-08	8.68616e-07	9.28731
93663	ENSG00000146376	ARHGAP18	Rho GTPase activating protein 18	2.41369	3.608	18.0149	4.96773e-08	8.72133e-07	9.31019
51068	ENSG00000169251	NMD3	NMD3 ribosome export adaptor	2.05157	5.02151	18.0141	4.96958e-08	8.72133e-07	9.18424
51361	ENSG00000134709	HOOK1	hook microtubule tethering protein 1	1.95672	4.98429	18.009	4.98125e-08	8.73028e-07	9.1816
402483	NA	LINC01000	long intergenic non-protein coding RNA 1000	1.93219	6.09392	17.9865	5.03282e-08	8.78886e-07	9.09473
84612	ENSG00000124171	PARD6B	par-6 family cell polarity regulator beta	2.64939	3.07051	17.9823	5.04245e-08	8.80026e-07	9.31431
55074	ENSG00000164830	OXR1	oxidation resistance 1	2.57009	4.11948	17.9668	5.07849e-08	8.84158e-07	9.25617
134430	ENSG00000134987	WDR36	WD repeat domain 36	1.83019	4.78437	17.9663	5.07971e-08	8.84158e-07	9.17452
266747	ENSG00000159496	RGL4	ral guanine nucleotide dissociation stimulator like 4	2.15925	4.22694	17.9653	5.08198e-08	8.84158e-07	9.23355
22878	ENSG00000153339	TRAPPC8	trafficking protein particle complex subunit 8	3.41384	4.78091	17.9628	5.08791e-08	8.84158e-07	9.22736
152559	ENSG00000163291	PAQR3	progestin and adipoQ receptor family member 3	2.80576	3.08227	17.957	5.10133e-08	8.85404e-07	9.30264
23548	ENSG00000113638	TTC33	tetratricopeptide repeat domain 33	2.33547	3.53788	17.9104	5.21193e-08	9.00199e-07	9.26352
56946	ENSG00000158636	EMSY	EMSY transcriptional repressor, BRCA2 interacting	1.9229	4.55624	17.905	5.2248e-08	9.01874e-07	9.16737
64397	ENSG00000103994	ZNF106	zinc finger protein 106	1.67606	6.32402	17.8866	5.26934e-08	9.08458e-07	9.03025
53981	ENSG00000165934	CPSF2	cleavage and polyadenylation specific factor 2	1.42923	6.29475	17.8813	5.28226e-08	9.0958e-07	9.0258
9213	ENSG00000143324	XPR1	xenotropic and polytropic retrovirus receptor 1	2.24682	5.17052	17.8489	5.3618e-08	9.20877e-07	9.09599
10133	ENSG00000123240	OPTN	optineurin	3.02081	5.23662	17.8485	5.3627e-08	9.20877e-07	9.11857
55841	ENSG00000047644	WWC3	WWC family member 3	1.93254	4.66533	17.8459	5.36918e-08	9.21009e-07	9.12936
283450	ENSG00000173064	HECTD4	HECT domain E3 ubiquitin protein ligase 4	2.7141	6.23261	17.8438	5.37432e-08	9.21009e-07	9.03154
9929	ENSG00000100221	JOSD1	Josephin domain containing 1	1.41038	6.5613	17.8437	5.37458e-08	9.21009e-07	8.99566
23507	ENSG00000197147	LRRC8B	leucine rich repeat containing 8 VRAC subunit B	1.93104	4.58222	17.8406	5.3824e-08	9.21793e-07	9.13379
55529	ENSG00000155099	PIP4P2	phosphatidylinositol-4,5-bisphosphate 4-phosphatase 2	2.44622	3.20297	17.8343	5.39796e-08	9.2351e-07	9.24348
168850	ENSG00000048405	ZNF800	zinc finger protein 800	2.35031	4.55698	17.8339	5.39893e-08	9.2351e-07	9.1465
547	ENSG00000130294	KIF1A	kinesin family member 1A	1.43812	7.58772	17.8279	5.41404e-08	9.25536e-07	8.95536
9874	ENSG00000198586	TLK1	tousled like kinase 1	1.54528	5.56014	17.8264	5.41768e-08	9.25601e-07	9.03991
29116	ENSG00000007944	MYLIP	myosin regulatory light chain interacting protein	1.86668	4.35239	17.8213	5.43061e-08	9.26979e-07	9.14361
51780	ENSG00000120733	KDM3B	lysine demethylase 3B	2.06987	6.20816	17.8162	5.44338e-08	9.27909e-07	9.00673
50810	ENSG00000166503	HDGFL3	HDGF like 3	1.62071	5.05215	17.8151	5.44623e-08	9.27909e-07	9.07248
22911	ENSG00000085433	WDR47	WD repeat domain 47	2.77547	3.62987	17.8139	5.44922e-08	9.27909e-07	9.22195
192670	ENSG00000134698	AGO4	argonaute RISC component 4	2.3329	5.10849	17.8086	5.46242e-08	9.28775e-07	9.08415
170960	ENSG00000182903	ZNF721	zinc finger protein 721	1.79978	4.72098	17.8022	5.47884e-08	9.30894e-07	9.09867
5138	ENSG00000186642	PDE2A	phosphodiesterase 2A	2.97758	2.77327	17.7964	5.49357e-08	9.32397e-07	9.21893
5074	ENSG00000177425	PAWR	pro-apoptotic WT1 regulator	1.54287	6.13459	17.7918	5.50527e-08	9.33824e-07	8.99029
324	ENSG00000134982	APC	APC regulator of WNT signaling pathway	2.33641	3.90675	17.7902	5.50932e-08	9.33953e-07	9.18132
5270	ENSG00000135919	SERPINE2	serpin family E member 2	3.20785	2.86729	17.7865	5.51866e-08	9.34421e-07	9.21385
23291	ENSG00000072803	FBXW11	F-box and WD repeat domain containing 11	1.48119	5.5829	17.7814	5.53172e-08	9.36074e-07	9.01495
25909	ENSG00000153207	AHCTF1	AT-hook containing transcription factor 1	2.4027	5.74435	17.7605	5.58575e-08	9.42968e-07	9.01331
8545	ENSG00000163320	CGGBP1	CGG triplet repeat binding protein 1	1.61526	6.38127	17.7482	5.61751e-08	9.47205e-07	8.95803
221710	ENSG00000224531	SMIM13	small integral membrane protein 13	2.4554	4.3945	17.7348	5.65268e-08	9.52003e-07	9.11843
9710	ENSG00000166398	GARRE1	granule associated Rac and RHOG effector 1	3.63481	3.43797	17.7313	5.66173e-08	9.52963e-07	9.19911
9880	ENSG00000166860	ZBTB39	zinc finger and BTB domain containing 39	3.80158	2.17878	17.7117	5.71368e-08	9.58533e-07	9.05505
124739	ENSG00000154914	USP43	ubiquitin specific peptidase 43	2.11933	3.68495	17.7112	5.71508e-08	9.58533e-07	9.15441
550112	ENSG00000248049	UBA6-DT	UBA6 divergent transcript	1.70116	4.82213	17.6971	5.75258e-08	9.63685e-07	9.03529
51526	ENSG00000132823	OSER1	oxidative stress responsive serine rich 1	1.67939	6.30999	17.6953	5.75737e-08	9.63775e-07	8.93567
80205	ENSG00000177200	CHD9	chromodomain helicase DNA binding protein 9	1.84246	5.05469	17.6944	5.75991e-08	9.63775e-07	9.01841
4643	ENSG00000157483	MYO1E	myosin IE	2.60821	4.54114	17.6905	5.77041e-08	9.64964e-07	9.08695
9462	ENSG00000075391	RASAL2	RAS protein activator like 2	2.15864	3.76523	17.6867	5.78047e-08	9.65509e-07	9.1375
8672	ENSG00000075151	EIF4G3	eukaryotic translation initiation factor 4 gamma 3	2.06675	6.38844	17.6847	5.78607e-08	9.65876e-07	8.93207
56911	ENSG00000156265	MAP3K7CL	MAP3K7 C-terminal like	4.07032	2.46583	17.6682	5.83072e-08	9.71616e-07	9.06822
9702	ENSG00000166037	CEP57	centrosomal protein 57	2.19991	5.57183	17.6665	5.83525e-08	9.71801e-07	8.97344
3909	ENSG00000053747	LAMA3	laminin subunit alpha 3	2.3401	6.73761	17.6548	5.86721e-08	9.74881e-07	8.90567
54456	ENSG00000073146	MOV10L1	Mov10 like RISC complex RNA helicase 1	2.9007	4.05772	17.6472	5.88813e-08	9.77168e-07	9.11969
1829	ENSG00000046604	DSG2	desmoglein 2	1.75996	6.10415	17.643	5.89962e-08	9.78502e-07	8.92048
57169	ENSG00000124201	ZNFX1	zinc finger NFX1-type containing 1	1.64181	6.06529	17.6378	5.91383e-08	9.79716e-07	8.9182
8556	ENSG00000079335	CDC14A	cell division cycle 14A	2.85496	3.38657	17.6287	5.93916e-08	9.82765e-07	9.14621
112479	ENSG00000196678	ERI2	ERI1 exoribonuclease family member 2	2.94771	3.10024	17.6272	5.94331e-08	9.82879e-07	9.15086
2799	ENSG00000135677	GNS	glucosamine (N-acetyl)-6-sulfatase	1.44054	7.37821	17.6228	5.95545e-08	9.84314e-07	8.85763
7102	ENSG00000156298	TSPAN7	tetraspanin 7	2.09423	3.67118	17.6172	5.97113e-08	9.8633e-07	9.10954
51330	ENSG00000006327	TNFRSF12A	TNF receptor superfamily member 12A	2.31504	5.32398	17.6056	6.0037e-08	9.88261e-07	8.96576
7109	ENSG00000160218	TRAPPC10	trafficking protein particle complex subunit 10	3.77668	4.09617	17.5945	6.03472e-08	9.92718e-07	9.11487
51059	ENSG00000147724	FAM135B	family with sequence similarity 135 member B	3.25373	2.61809	17.5916	6.04313e-08	9.93025e-07	9.10833
27244	ENSG00000080546	SESN1	sestrin 1	1.63395	6.04509	17.5849	6.06204e-08	9.94981e-07	8.89251
124808	ENSG00000180329	CCDC43	coiled-coil domain containing 43	2.32248	3.35726	17.5816	6.07134e-08	9.95931e-07	9.11686
91404	ENSG00000187231	SESTD1	SEC14 and spectrin domain containing 1	2.7902	3.23658	17.5736	6.09421e-08	9.99106e-07	9.12373
51091	ENSG00000109618	SEPSECS	Sep (O-phosphoserine) tRNA:Sec (selenocysteine) tRNA synthase	1.90726	4.74957	17.5717	6.09964e-08	9.99225e-07	8.98563
153364	ENSG00000176055	MBLAC2	metallo-beta-lactamase domain containing 2	1.85694	4.183	17.5622	6.1269e-08	1.00106e-06	9.03214
55187	ENSG00000048707	VPS13D	vacuolar protein sorting 13 homolog D	1.89721	6.00465	17.562	6.12729e-08	1.00106e-06	8.88734
8451	ENSG00000139842	CUL4A	cullin 4A	1.50793	6.19439	17.5384	6.19562e-08	1.01106e-06	8.85968
55279	ENSG00000175105	ZNF654	zinc finger protein 654	2.49778	4.21253	17.5342	6.2079e-08	1.01248e-06	9.03691
9897	ENSG00000164961	WASHC5	WASH complex subunit 5	1.51059	5.56147	17.5278	6.22643e-08	1.01434e-06	8.8899
7182	ENSG00000177463	NR2C2	nuclear receptor subfamily 2 group C member 2	2.55297	3.58597	17.5229	6.2408e-08	1.0161e-06	9.08072
64398	ENSG00000072415	PALS1	protein associated with LIN7 1, MAGUK p55 family member	1.58457	5.54271	17.5147	6.26494e-08	1.01855e-06	8.88574
868	ENSG00000114423	CBLB	Cbl proto-oncogene B	1.91371	4.7393	17.5142	6.26662e-08	1.01855e-06	8.95786
55294	ENSG00000109670	FBXW7	F-box and WD repeat domain containing 7	1.95393	4.64775	17.5127	6.27089e-08	1.01866e-06	8.96752
8615	ENSG00000138768	USO1	USO1 vesicle transport factor	1.8965	6.20909	17.5015	6.30401e-08	1.02155e-06	8.8459
4548	ENSG00000116984	MTR	5-methyltetrahydrofolate-homocysteine methyltransferase	1.64359	5.28522	17.5006	6.30669e-08	1.02155e-06	8.89797
10579	ENSG00000138162	TACC2	transforming acidic coiled-coil containing protein 2	1.68334	7.22389	17.4736	6.38753e-08	1.03175e-06	8.78836
22887	ENSG00000198815	FOXJ3	forkhead box J3	1.65592	6.19473	17.4735	6.38782e-08	1.03175e-06	8.82883
4651	ENSG00000145555	MYO10	myosin X	2.89171	6.03776	17.4632	6.41891e-08	1.03533e-06	8.85708
8491	ENSG00000011566	MAP4K3	mitogen-activated protein kinase kinase kinase kinase 3	2.61696	3.33407	17.4625	6.42092e-08	1.03533e-06	9.06649
55614	ENSG00000089177	KIF16B	kinesin family member 16B	3.06471	3.6614	17.4584	6.43318e-08	1.03672e-06	9.05687
7398	ENSG00000162607	USP1	ubiquitin specific peptidase 1	1.65003	5.0929	17.4359	6.50201e-08	1.04662e-06	8.88061
260425	ENSG00000081026	MAGI3	membrane associated guanylate kinase, WW and PDZ domain containing 3	1.99801	4.13485	17.432	6.51392e-08	1.04795e-06	8.97644
23545	ENSG00000185344	ATP6V0A2	ATPase H+ transporting V0 subunit a2	1.95081	4.45297	17.4287	6.52425e-08	1.04877e-06	8.94313
7188	ENSG00000082512	TRAF5	TNF receptor associated factor 5	3.13212	2.73992	17.428	6.5264e-08	1.04877e-06	9.04689
10650	ENSG00000141391	PRELID3A	PRELI domain containing 3A	2.01611	3.8359	17.4144	6.56848e-08	1.05374e-06	8.99503
5989	ENSG00000132005	RFX1	regulatory factor X1	2.33736	4.23745	17.4057	6.59528e-08	1.05685e-06	8.96612
55236	ENSG00000033178	UBA6	ubiquitin like modifier activating enzyme 6	1.5384	5.27872	17.3985	6.61804e-08	1.05989e-06	8.84467
7699	ENSG00000196387	ZNF140	zinc finger protein 140	1.60911	5.07678	17.3894	6.64662e-08	1.0638e-06	8.85725
8932	ENSG00000134046	MBD2	methyl-CpG binding domain protein 2	1.61727	6.05704	17.3701	6.70743e-08	1.06999e-06	8.78261
4216	ENSG00000085511	MAP3K4	mitogen-activated protein kinase kinase kinase 4	1.71986	5.12992	17.3611	6.73609e-08	1.07335e-06	8.84163
3936	ENSG00000136167	LCP1	lymphocyte cytosolic protein 1	2.02899	5.39527	17.357	6.74933e-08	1.07486e-06	8.82633
5793	ENSG00000144724	PTPRG	protein tyrosine phosphatase receptor type G	4.39806	1.73155	17.3429	6.79451e-08	1.08084e-06	8.6945
132864	ENSG00000137449	CPEB2	cytoplasmic polyadenylation element binding protein 2	5.52504	1.62764	17.3404	6.80264e-08	1.08153e-06	8.41632
81847	ENSG00000118518	RNF146	ring finger protein 146	2.16931	4.91729	17.3265	6.84761e-08	1.08807e-06	8.85517
219736	ENSG00000165730	STOX1	storkhead box 1	3.02349	2.84932	17.3173	6.8777e-08	1.09224e-06	9.00245
5336	ENSG00000197943	PLCG2	phospholipase C gamma 2	2.94122	2.82003	17.313	6.89172e-08	1.09317e-06	8.99993
9439	ENSG00000112282	MED23	mediator complex subunit 23	1.88942	4.93492	17.312	6.8951e-08	1.09317e-06	8.83773
23258	ENSG00000184014	DENND5A	DENN domain containing 5A	2.05516	5.80954	17.2976	6.94242e-08	1.10006e-06	8.76768
10048	ENSG00000010017	RANBP9	RAN binding protein 9	1.66406	5.07424	17.2949	6.95139e-08	1.10086e-06	8.81086
161835	ENSG00000150667	FSIP1	fibrous sheath interacting protein 1	3.3441	2.47774	17.2924	6.95968e-08	1.10108e-06	8.95436
7128	ENSG00000118503	TNFAIP3	TNF alpha induced protein 3	3.92724	2.27941	17.2894	6.96957e-08	1.1019e-06	8.88725
9110	ENSG00000108389	MTMR4	myotubularin related protein 4	1.68837	5.6875	17.2824	6.99271e-08	1.10494e-06	8.76061
26005	ENSG00000168014	C2CD3	C2 domain containing 3 centriole elongation regulator	2.01611	4.89909	17.2809	6.99787e-08	1.10514e-06	8.82879
7532	ENSG00000170027	YWHAG	tyrosine 3-monooxygenase/tryptophan 5-monooxygenase activation protein gamma	1.4013	7.26661	17.2574	7.07675e-08	1.11511e-06	8.67385
55795	ENSG00000126226	PCID2	PCI domain containing 2	1.71129	5.73234	17.255	7.08456e-08	1.11511e-06	8.7441
10927	ENSG00000106723	SPIN1	spindlin 1	1.38777	5.97451	17.2536	7.08942e-08	1.11526e-06	8.72402
387758	ENSG00000176971	FIBIN	fin bud initiation factor homolog	5.11532	2.06391	17.2449	7.11887e-08	1.11927e-06	8.66442
4927	ENSG00000108559	NUP88	nucleoporin 88	1.51566	6.6283	17.2409	7.13269e-08	1.12082e-06	8.68861
54856	ENSG00000116580	GON4L	gon-4 like	1.77914	5.28502	17.2331	7.15928e-08	1.12321e-06	8.7654
10447	ENSG00000196937	FAM3C	FAM3 metabolism regulating signaling molecule C	1.53663	5.11145	17.2329	7.15973e-08	1.12321e-06	8.77327
9354	ENSG00000110344	UBE4A	ubiquitination factor E4A	1.51291	6.2975	17.2263	7.18258e-08	1.12485e-06	8.69552
84640	ENSG00000170185	USP38	ubiquitin specific peptidase 38	2.05781	4.21412	17.2252	7.18605e-08	1.12485e-06	8.86756
658	ENSG00000138696	BMPR1B	bone morphogenetic protein receptor type 1B	3.79578	2.01917	17.2178	7.21155e-08	1.12822e-06	8.80955
10939	ENSG00000141385	AFG3L2	AFG3 like matrix AAA peptidase subunit 2	1.41441	6.16219	17.1912	7.30395e-08	1.14079e-06	8.68259
5906	ENSG00000116473	RAP1A	RAP1A, member of RAS oncogene family	1.46893	5.3373	17.1855	7.32399e-08	1.14266e-06	8.7303
84248	ENSG00000122068	FYTTD1	forty-two-three domain containing 1	1.48952	5.68067	17.1797	7.34413e-08	1.14518e-06	8.70442
151742	ENSG00000163590	PPM1L	protein phosphatase, Mg2+/Mn2+ dependent 1L	3.30628	2.98488	17.1718	7.37226e-08	1.1483e-06	8.93412
85441	ENSG00000130589	HELZ2	helicase with zinc finger 2	1.67194	6.07544	17.1689	7.38221e-08	1.14922e-06	8.67918
5912	ENSG00000181467	RAP2B	RAP2B, member of RAS oncogene family	2.34628	4.4748	17.1648	7.39703e-08	1.15027e-06	8.82202
25759	ENSG00000129946	SHC2	SHC adaptor protein 2	1.94761	5.52632	17.1517	7.44363e-08	1.15561e-06	8.70983
100287015	ENSG00000246089	MCPH1-DT	MCPH1 divergent transcript	2.02137	4.16881	17.1489	7.45361e-08	1.15597e-06	8.83332
64921	ENSG00000127995	CASD1	CAS1 domain containing 1	2.02038	3.94113	17.1487	7.45404e-08	1.15597e-06	8.85374
23161	ENSG00000071189	SNX13	sorting nexin 13	1.82224	4.70431	17.1414	7.4803e-08	1.15932e-06	8.76991
3417	ENSG00000138413	IDH1	isocitrate dehydrogenase (NADP(+)) 1	1.30367	8.0838	17.1354	7.50194e-08	1.16109e-06	8.59097
100129842	ENSG00000237440	ZNF737	zinc finger protein 737	2.39421	3.14505	17.1314	7.51618e-08	1.1618e-06	8.91065
64764	ENSG00000182158	CREB3L2	cAMP responsive element binding protein 3 like 2	1.58209	5.25802	17.1302	7.52055e-08	1.16184e-06	8.71029
10075	ENSG00000086758	HUWE1	HECT, UBA and WWE domain containing E3 ubiquitin protein ligase 1	1.71452	8.05597	17.1282	7.52793e-08	1.16235e-06	8.58968
3981	ENSG00000174405	LIG4	DNA ligase 4	3.13811	3.67796	17.1233	7.54545e-08	1.16379e-06	8.89462
6653	ENSG00000137642	SORL1	sortilin related receptor 1	1.65824	5.10038	17.1083	7.60011e-08	1.17094e-06	8.71326
3656	ENSG00000134070	IRAK2	interleukin 1 receptor associated kinase 2	2.96621	2.51987	17.1029	7.61978e-08	1.1727e-06	8.88738
56180	ENSG00000101928	MOSPD1	motile sperm domain containing 1	2.03805	4.14879	17.097	7.64157e-08	1.17478e-06	8.80858
5781	ENSG00000179295	PTPN11	protein tyrosine phosphatase non-receptor type 11	1.91124	6.50785	17.0944	7.65107e-08	1.17561e-06	8.62294
79993	ENSG00000164181	ELOVL7	ELOVL fatty acid elongase 7	3.07676	5.00331	17.0911	7.66316e-08	1.17619e-06	8.76064
25943	ENSG00000088854	DNAAF9	dynein axonemal assembly factor 9	2.11125	4.49881	17.0797	7.70534e-08	1.18139e-06	8.76787
64762	ENSG00000141441	GAREM1	GRB2 associated regulator of MAPK1 subtype 1	2.65771	3.09087	17.0743	7.72551e-08	1.18384e-06	8.88748
7716	ENSG00000136451	VEZF1	vascular endothelial zinc finger 1	1.38524	5.87164	17.0715	7.73611e-08	1.18455e-06	8.63547
6990	ENSG00000165169	DYNLT3	dynein light chain Tctex-type 3	1.92689	4.92588	17.0697	7.74266e-08	1.18455e-06	8.71585
4520	ENSG00000188786	MTF1	metal regulatory transcription factor 1	1.5576	4.85118	17.0596	7.78042e-08	1.18864e-06	8.70689
23195	ENSG00000112159	MDN1	midasin AAA ATPase 1	1.73887	5.24602	17.0582	7.78579e-08	1.18864e-06	8.67755
64343	ENSG00000163512	AZI2	5-azacytidine induced 2	1.47857	5.57288	17.0488	7.82095e-08	1.19267e-06	8.64355
253832	ENSG00000180776	ZDHHC20	zinc finger DHHC-type palmitoyltransferase 20	2.07697	4.44892	17.045	7.83532e-08	1.19422e-06	8.7538
8727	ENSG00000119326	CTNNAL1	catenin alpha like 1	1.58532	5.52631	17.0422	7.84619e-08	1.19466e-06	8.64514
23515	ENSG00000159256	MORC3	MORC family CW-type zinc finger 3	2.59965	4.43981	17.0394	7.85678e-08	1.19557e-06	8.77114
85416	ENSG00000139800	ZIC5	Zic family member 5	3.99633	3.28126	17.0307	7.88968e-08	1.19865e-06	8.86803
1051	ENSG00000172216	CEBPB	CCAAT enhancer binding protein beta	1.61671	5.45301	17.0286	7.89754e-08	1.1992e-06	8.6442
113730	ENSG00000130487	KLHDC7B	kelch domain containing 7B	2.44036	4.03856	17.0257	7.90872e-08	1.19945e-06	8.797
90333	ENSG00000204604	ZNF468	zinc finger protein 468	3.22215	4.01389	17.0159	7.94623e-08	1.20402e-06	8.82075
54806	ENSG00000135541	AHI1	Abelson helper integration site 1	1.55243	5.45733	16.9937	8.03216e-08	1.21445e-06	8.62415
114781	ENSG00000183826	BTBD9	BTB domain containing 9	1.68242	4.98967	16.9851	8.06555e-08	1.21755e-06	8.65955
23506	ENSG00000112624	BICRAL	BICRA like chromatin remodeling complex associated protein	2.32274	4.15071	16.9705	8.12271e-08	1.22311e-06	8.75401
9924	ENSG00000135473	PAN2	poly(A) specific ribonuclease subunit PAN2	1.63679	7.0339	16.9702	8.12392e-08	1.22311e-06	8.5339
57589	ENSG00000107036	RIC1	RIC1 homolog, RAB6A GEF complex partner 1	2.21815	4.49144	16.9584	8.1706e-08	1.22881e-06	8.71025
8731	ENSG00000101654	RNMT	RNA guanine-7 methyltransferase	1.52789	5.43112	16.9443	8.22663e-08	1.23595e-06	8.59985
80000	ENSG00000141449	GREB1L	GREB1 like retinoic acid receptor coactivator	2.50124	3.1496	16.9425	8.2336e-08	1.23635e-06	8.8194
9586	ENSG00000146592	CREB5	cAMP responsive element binding protein 5	5.44894	1.57811	16.9369	8.25602e-08	1.23789e-06	8.27906
23085	ENSG00000082805	ERC1	ELKS/RAB6-interacting/CAST family member 1	2.10355	5.25414	16.9337	8.26917e-08	1.23841e-06	8.62199
23786	ENSG00000099968	BCL2L13	BCL2 like 13	2.25469	6.73075	16.9294	8.28614e-08	1.2403e-06	8.53192
161176	ENSG00000176438	SYNE3	spectrin repeat containing nuclear envelope family member 3	4.67952	2.48062	16.9249	8.30459e-08	1.24184e-06	8.6929
26092	ENSG00000143337	TOR1AIP1	torsin 1A interacting protein 1	2.70688	5.53728	16.9114	8.35909e-08	1.24924e-06	8.60535
9711	ENSG00000145016	RUBCN	rubicon autophagy regulator	1.582	5.3774	16.9039	8.38968e-08	1.25316e-06	8.58402
205327	ENSG00000178074	C2orf69	chromosome 2 open reading frame 69	1.93473	3.78078	16.8944	8.42828e-08	1.2576e-06	8.73747
1121	ENSG00000188419	CHM	CHM Rab escort protein	2.29354	3.904	16.8927	8.43533e-08	1.25799e-06	8.73701
80124	ENSG00000175073	VCPIP1	valosin containing protein interacting protein 1	2.77834	3.95508	16.886	8.46286e-08	1.26143e-06	8.74748
79665	ENSG00000108406	DHX40	DEAH-box helicase 40	1.56594	5.85933	16.8823	8.47809e-08	1.26242e-06	8.54031
23731	ENSG00000106771	TMEM245	transmembrane protein 245	1.57799	5.01422	16.8823	8.47835e-08	1.26242e-06	8.60151
143098	ENSG00000150054	MPP7	MAGUK p55 scaffold protein 7	2.35275	3.49989	16.8726	8.51836e-08	1.26694e-06	8.76159
10098	ENSG00000168785	TSPAN5	tetraspanin 5	4.09809	3.04334	16.8724	8.51904e-08	1.26694e-06	8.77967
54149	ENSG00000154642	C21orf91	chromosome 21 open reading frame 91	2.2903	3.42808	16.8705	8.52693e-08	1.26699e-06	8.76408
122809	ENSG00000180008	SOCS4	suppressor of cytokine signaling 4	1.65268	4.90687	16.8598	8.57165e-08	1.27164e-06	8.60133
5495	ENSG00000138032	PPM1B	protein phosphatase, Mg2+/Mn2+ dependent 1B	1.71957	4.25364	16.8496	8.61448e-08	1.27666e-06	8.66127
7296	ENSG00000198431	TXNRD1	thioredoxin reductase 1	2.04566	7.51258	16.8454	8.6319e-08	1.27858e-06	8.45696
64848	ENSG00000047188	YTHDC2	YTH N6-methyladenosine RNA binding protein C2	1.80006	4.90876	16.8327	8.68562e-08	1.28452e-06	8.59088
23608	ENSG00000133606	MKRN1	makorin ring finger protein 1	1.28598	6.71815	16.8092	8.78607e-08	1.29625e-06	8.45718
5290	ENSG00000121879	PIK3CA	phosphatidylinositol-4,5-bisphosphate 3-kinase catalytic subunit alpha	2.4237	3.58541	16.8088	8.78775e-08	1.29625e-06	8.72524
4077	ENSG00000188554	NBR1	NBR1 autophagy cargo receptor	1.74506	7.12945	16.8056	8.80129e-08	1.2969e-06	8.445
55607	ENSG00000158528	PPP1R9A	protein phosphatase 1 regulatory subunit 9A	2.74128	3.12668	16.7929	8.8565e-08	1.30368e-06	8.75031
9245	ENSG00000140297	GCNT3	glucosaminyl (N-acetyl) transferase 3, mucin type	4.3483	2.3174	16.7777	8.92261e-08	1.31205e-06	8.62517
54880	ENSG00000183337	BCOR	BCL6 corepressor	2.75089	5.52986	16.7605	8.99808e-08	1.32164e-06	8.52839
8031	ENSG00000266412	NCOA4	nuclear receptor coactivator 4	1.60011	6.96044	16.759	9.00481e-08	1.32164e-06	8.42467
10461	ENSG00000153208	MERTK	MER proto-oncogene, tyrosine kinase	2.2802	3.83679	16.7583	9.00752e-08	1.32164e-06	8.67397
1810	ENSG00000117505	DR1	down-regulator of transcription 1	2.05967	5.351	16.746	9.06206e-08	1.32775e-06	8.51453
26018	ENSG00000144749	LRIG1	leucine rich repeats and immunoglobulin like domains 1	1.65278	5.07717	16.7444	9.06931e-08	1.32812e-06	8.52553
4534	ENSG00000171100	MTM1	myotubularin 1	3.28652	2.80165	16.7422	9.07913e-08	1.32873e-06	8.72562
55626	ENSG00000110497	AMBRA1	autophagy and beclin 1 regulator 1	1.47887	5.51917	16.7414	9.08282e-08	1.32873e-06	8.48631
23380	ENSG00000266028	SRGAP2	SLIT-ROBO Rho GTPase activating protein 2	1.54787	5.59924	16.7397	9.09042e-08	1.32916e-06	8.48119
90268	ENSG00000154124	OTULIN	OTU deubiquitinase with linear linkage specificity	1.74296	4.62572	16.7345	9.11367e-08	1.33187e-06	8.56538
57224	ENSG00000135540	NHSL1	NHS like 1	2.288	3.982	16.7331	9.11994e-08	1.3321e-06	8.64754
8085	ENSG00000167548	KMT2D	lysine methyltransferase 2D	2.21948	6.62885	16.7272	9.14637e-08	1.33528e-06	8.42914
29028	ENSG00000156802	ATAD2	ATPase family AAA domain containing 2	1.73155	4.48442	16.7239	9.1611e-08	1.3363e-06	8.5729
650623	NA	BEND3P3	BEN domain containing 3 pseudogene 3	3.32606	2.41685	16.7191	9.18271e-08	1.33852e-06	8.68843
157378	ENSG00000164983	TMEM65	transmembrane protein 65	1.99064	4.50336	16.716	9.19659e-08	1.33945e-06	8.57549
4087	ENSG00000175387	SMAD2	SMAD family member 2	1.49457	6.01637	16.7156	9.19856e-08	1.33945e-06	8.44231
23033	ENSG00000083097	DOP1A	DOP1 leucine zipper like protein A	3.35719	3.87164	16.7127	9.21165e-08	1.33998e-06	8.68299
6041	ENSG00000135828	RNASEL	ribonuclease L	2.64022	3.03098	16.6945	9.29434e-08	1.34994e-06	8.70285
9575	ENSG00000134852	CLOCK	clock circadian regulator	1.48942	5.29493	16.6921	9.30527e-08	1.3506e-06	8.47666
201163	ENSG00000154803	FLCN	folliculin	2.57564	6.26851	16.6914	9.30843e-08	1.3506e-06	8.43504
22874	ENSG00000143850	PLEKHA6	pleckstrin homology domain containing A6	1.47497	5.37649	16.6848	9.33881e-08	1.35432e-06	8.46639
29957	ENSG00000085491	SLC25A24	solute carrier family 25 member 24	2.6202	3.55168	16.6827	9.34838e-08	1.35447e-06	8.6693
55132	ENSG00000138709	LARP1B	La ribonucleoprotein 1B	1.58467	5.03667	16.6825	9.34939e-08	1.35447e-06	8.49479
1183	ENSG00000073464	CLCN4	chloride voltage-gated channel 4	1.9528	3.83593	16.6741	9.38835e-08	1.35942e-06	8.62054
51562	ENSG00000151332	MBIP	MAP3K12 binding inhibitory protein 1	1.84227	3.99921	16.6611	9.44873e-08	1.36538e-06	8.59341
1047	ENSG00000153132	CLGN	calmegin	1.38842	6.87325	16.6569	9.4681e-08	1.36691e-06	8.37139
90809	ENSG00000165782	PIP4P1	phosphatidylinositol-4,5-bisphosphate 4-phosphatase 1	1.4327	5.61033	16.6567	9.46897e-08	1.36691e-06	8.43429
55596	ENSG00000033030	ZCCHC8	zinc finger CCHC-type containing 8	1.61048	5.43041	16.6218	9.63382e-08	1.38634e-06	8.43199
5794	ENSG00000080031	PTPRH	protein tyrosine phosphatase receptor type H	3.7421	2.08475	16.6118	9.68141e-08	1.38981e-06	8.56594
2820	ENSG00000115159	GPD2	glycerol-3-phosphate dehydrogenase 2	2.01794	3.97731	16.6106	9.68726e-08	1.38994e-06	8.57632
55762	ENSG00000167562	ZNF701	zinc finger protein 701	2.25745	3.33685	16.5996	9.74004e-08	1.39611e-06	8.63302
26049	ENSG00000198780	FAM169A	family with sequence similarity 169 member A	2.6404	4.32536	16.5977	9.74889e-08	1.39652e-06	8.55964
115825	ENSG00000139668	WDFY2	WD repeat and FYVE domain containing 2	1.76636	4.14353	16.5969	9.75282e-08	1.39652e-06	8.54305
5151	ENSG00000073417	PDE8A	phosphodiesterase 8A	1.91596	4.83437	16.5938	9.76799e-08	1.39689e-06	8.47579
6938	ENSG00000140262	TCF12	transcription factor 12	2.7803	5.13009	16.5896	9.78809e-08	1.39876e-06	8.47577
7037	ENSG00000072274	TFRC	transferrin receptor	1.93073	6.78262	16.5687	9.89007e-08	1.41049e-06	8.33398
8535	ENSG00000141582	CBX4	chromobox 4	2.1094	8.09357	16.5572	9.94661e-08	1.41642e-06	8.28883
114569	ENSG00000147676	MAL2	mal, T cell differentiation protein 2	1.33539	7.33729	16.5557	9.95385e-08	1.41651e-06	8.30155
6667	ENSG00000185591	SP1	Sp1 transcription factor	2.17726	5.9628	16.553	9.96717e-08	1.41651e-06	8.3711
51542	ENSG00000143952	VPS54	VPS54 subunit of GARP complex	1.94555	5.43326	16.5509	9.97794e-08	1.41733e-06	8.40161
56261	ENSG00000125772	GPCPD1	glycerophosphocholine phosphodiesterase 1	1.66921	4.85787	16.5497	9.98347e-08	1.4174e-06	8.44275
91050	ENSG00000181982	CCDC149	coiled-coil domain containing 149	1.60041	5.16361	16.5485	9.9897e-08	1.4174e-06	8.41372
146223	ENSG00000183723	CMTM4	CKLF like MARVEL transmembrane domain containing 4	1.32756	6.31399	16.5477	9.99344e-08	1.4174e-06	8.33552
6738	ENSG00000116747	RO60	Ro60, Y RNA binding protein	1.64665	4.80004	16.5441	1.00116e-07	1.41927e-06	8.44498
80314	ENSG00000120616	EPC1	enhancer of polycomb homolog 1	1.53226	5.51796	16.5411	1.00261e-07	1.41991e-06	8.38096
10207	ENSG00000132849	PATJ	PATJ crumbs cell polarity complex component	1.81299	6.11549	16.5381	1.00413e-07	1.42135e-06	8.34724
25948	ENSG00000170852	KBTBD2	kelch repeat and BTB domain containing 2	1.54103	4.71063	16.5357	1.00532e-07	1.42233e-06	8.44576
114885	ENSG00000144909	OSBPL11	oxysterol binding protein like 11	2.53025	3.62555	16.5253	1.01054e-07	1.42687e-06	8.58054
54502	ENSG00000163694	RBM47	RNA binding motif protein 47	1.46005	5.71469	16.5175	1.01447e-07	1.431e-06	8.35377
51460	ENSG00000163935	SFMBT1	Scm like with four mbt domains 1	1.53279	5.31629	16.5052	1.02067e-07	1.43902e-06	8.37647
5108	ENSG00000078674	PCM1	pericentriolar material 1	1.35361	6.88295	16.5019	1.02234e-07	1.44066e-06	8.28746
55784	ENSG00000140563	MCTP2	multiple C2 and transmembrane domain containing 2	2.01423	4.8368	16.4956	1.02555e-07	1.44304e-06	8.42669
23512	ENSG00000178691	SUZ12	SUZ12 polycomb repressive complex 2 subunit	1.46947	5.42552	16.4859	1.03053e-07	1.44789e-06	8.35683
10040	ENSG00000141198	TOM1L1	target of myb1 like 1 membrane trafficking protein	2.44323	5.38408	16.481	1.03303e-07	1.44926e-06	8.38264
91452	ENSG00000107897	ACBD5	acyl-CoA binding domain containing 5	1.78019	4.36548	16.4698	1.0388e-07	1.45663e-06	8.4537
50807	ENSG00000153317	ASAP1	ArfGAP with SH3 domain, ankyrin repeat and PH domain 1	2.03603	4.79173	16.4619	1.04292e-07	1.46169e-06	8.41402
729830	ENSG00000164142	FHIP1A	FHF complex subunit HOOK interacting protein 1A	3.02766	4.32956	16.4572	1.04537e-07	1.4644e-06	8.49839
2634	ENSG00000162645	GBP2	guanylate binding protein 2	2.38172	3.51567	16.4452	1.05165e-07	1.46987e-06	8.54491
2475	ENSG00000198793	MTOR	mechanistic target of rapamycin kinase	1.75577	6.59005	16.4449	1.05183e-07	1.46987e-06	8.273
253725	ENSG00000172661	WASHC2C	WASH complex subunit 2C	1.5603	6.00405	16.4438	1.05238e-07	1.46987e-06	8.29865
166815	ENSG00000180346	TIGD2	tigger transposable element derived 2	1.92218	4.03434	16.4422	1.05325e-07	1.47035e-06	8.47809
55379	ENSG00000108829	LRRC59	leucine rich repeat containing 59	1.76848	7.13499	16.4389	1.05494e-07	1.47199e-06	8.24866
114659	ENSG00000185158	LRRC37B	leucine rich repeat containing 37B	2.12469	3.62547	16.4271	1.06121e-07	1.47796e-06	8.51721
10782	ENSG00000171606	ZNF274	zinc finger protein 274	2.57418	5.8457	16.4269	1.0613e-07	1.47796e-06	8.32093
1314	ENSG00000122218	COPA	COPI coat complex subunit alpha	1.49971	7.47956	16.4249	1.06234e-07	1.47869e-06	8.22813
9925	ENSG00000168795	ZBTB5	zinc finger and BTB domain containing 5	1.5494	4.82748	16.4142	1.06807e-07	1.48447e-06	8.36996
6907	ENSG00000101849	TBL1X	transducin beta like 1 X-linked	1.43449	6.4375	16.4037	1.07369e-07	1.49009e-06	8.25346
9877	ENSG00000058673	ZC3H11A	zinc finger CCCH-type containing 11A	1.41	6.79942	16.3966	1.07753e-07	1.49212e-06	8.23421
8554	ENSG00000033800	PIAS1	protein inhibitor of activated STAT 1	1.8919	4.48766	16.3961	1.07776e-07	1.49212e-06	8.40502
80204	ENSG00000138081	FBXO11	F-box protein 11	1.53535	4.68269	16.3961	1.07777e-07	1.49212e-06	8.37385
90874	ENSG00000143067	ZNF697	zinc finger protein 697	2.54564	2.96451	16.3909	1.08059e-07	1.49311e-06	8.55237
57679	ENSG00000003393	ALS2	alsin Rho guanine nucleotide exchange factor ALS2	1.91895	4.61148	16.3889	1.08167e-07	1.49387e-06	8.3892
57210	ENSG00000022567	SLC45A4	solute carrier family 45 member 4	1.49526	5.26441	16.3878	1.08224e-07	1.49393e-06	8.31677
5318	ENSG00000057294	PKP2	plakophilin 2	2.72096	3.19007	16.3837	1.08451e-07	1.49634e-06	8.54172
5500	ENSG00000213639	PPP1CB	protein phosphatase 1 catalytic subunit beta	1.57981	7.14449	16.3814	1.08573e-07	1.4973e-06	8.21537
9631	ENSG00000113569	NUP155	nucleoporin 155	1.95143	4.85994	16.3766	1.08837e-07	1.49836e-06	8.3588
7358	ENSG00000109814	UGDH	UDP-glucose 6-dehydrogenase	1.65653	5.05631	16.3763	1.08854e-07	1.49836e-06	8.33179
10116	ENSG00000169018	FEM1B	fem-1 homolog B	1.82605	5.78407	16.3729	1.09036e-07	1.50003e-06	8.27873
100859930	ENSG00000278970	HEIH	hepatocellular carcinoma up-regulated EZH2-associated long non-coding RNA	1.62479	6.62923	16.3625	1.09604e-07	1.50567e-06	8.22513
80818	ENSG00000125945	ZNF436	zinc finger protein 436	2.34855	3.31536	16.3611	1.09684e-07	1.50604e-06	8.51436
10725	ENSG00000102908	NFAT5	nuclear factor of activated T cells 5	1.39119	6.02406	16.3525	1.10156e-07	1.50961e-06	8.24561
2195	ENSG00000083857	FAT1	FAT atypical cadherin 1	2.67668	3.79724	16.3525	1.10157e-07	1.50961e-06	8.48123
5908	ENSG00000127314	RAP1B	RAP1B, member of RAS oncogene family	2.81505	5.1838	16.3458	1.1053e-07	1.51399e-06	8.34188
9183	ENSG00000086827	ZW10	zw10 kinetochore protein	2.07594	4.7209	16.3413	1.10779e-07	1.51594e-06	8.3581
646762	NA	LOC646762	uncharacterized LOC646762	2.48489	3.10221	16.3304	1.11386e-07	1.52278e-06	8.51457
9527	ENSG00000108587	GOSR1	golgi SNAP receptor complex member 1	1.46139	5.95609	16.3281	1.11518e-07	1.52311e-06	8.23719
54521	ENSG00000131725	WDR44	WD repeat domain 44	2.36989	3.32836	16.3261	1.11627e-07	1.52373e-06	8.4961
57161	ENSG00000139946	PELI2	pellino E3 ubiquitin protein ligase family member 2	2.22934	4.29595	16.3253	1.1167e-07	1.52373e-06	8.40002
148523	ENSG00000159208	CIART	circadian associated repressor of transcription	1.68891	4.90437	16.3236	1.11766e-07	1.52392e-06	8.31807
23181	ENSG00000160305	DIP2A	disco interacting protein 2 homolog A	1.43964	6.28487	16.3232	1.11792e-07	1.52392e-06	8.21691
9135	ENSG00000029725	RABEP1	rabaptin, RAB GTPase binding effector protein 1	1.36493	6.61079	16.3145	1.12281e-07	1.52803e-06	8.19668
7050	ENSG00000177426	TGIF1	TGFB induced factor homeobox 1	1.48888	5.74808	16.2868	1.13859e-07	1.54514e-06	8.22767
84888	ENSG00000138600	SPPL2A	signal peptide peptidase like 2A	1.44699	5.42597	16.2866	1.13869e-07	1.54514e-06	8.24882
308	ENSG00000164111	ANXA5	annexin A5	1.27689	6.57218	16.2712	1.14753e-07	1.55459e-06	8.17374
23097	ENSG00000155111	CDK19	cyclin dependent kinase 19	1.36512	5.78371	16.26	1.15408e-07	1.56188e-06	8.20879
1955	ENSG00000106780	MEGF9	multiple EGF like domains 9	2.48107	3.63416	16.2505	1.15958e-07	1.56792e-06	8.43549
9320	ENSG00000153827	TRIP12	thyroid hormone receptor interactor 12	1.463	6.64745	16.2244	1.17499e-07	1.58629e-06	8.14702
123720	ENSG00000156232	WHAMM	WASP homolog associated with actin, golgi membranes and microtubules	2.03248	4.41679	16.2237	1.1754e-07	1.58629e-06	8.32662
3717	ENSG00000096968	JAK2	Janus kinase 2	1.51405	4.74329	16.2223	1.17625e-07	1.58668e-06	8.27381
57120	ENSG00000047932	GOPC	golgi associated PDZ and coiled-coil motif containing	1.63174	4.89899	16.2211	1.17697e-07	1.5869e-06	8.2619
22876	ENSG00000198825	INPP5F	inositol polyphosphate-5-phosphatase F	1.92075	3.70706	16.2154	1.18035e-07	1.59071e-06	8.3915
54462	ENSG00000107771	CCSER2	coiled-coil serine rich protein 2	2.20931	4.50913	16.2052	1.18646e-07	1.59666e-06	8.31208
7164	ENSG00000111907	TPD52L1	TPD52 like 1	1.5538	6.91026	16.1956	1.19221e-07	1.60288e-06	8.12191
6801	ENSG00000115808	STRN	striatin	1.98537	4.58611	16.1896	1.19586e-07	1.60475e-06	8.2871
4012	ENSG00000113441	LNPEP	leucyl and cystinyl aminopeptidase	3.04627	2.88255	16.1869	1.19749e-07	1.60617e-06	8.45469
2339	ENSG00000168522	FNTA	farnesyltransferase, CAAX box, alpha	1.26066	6.47249	16.1847	1.19885e-07	1.60724e-06	8.13046
1844	ENSG00000158050	DUSP2	dual specificity phosphatase 2	1.9543	4.61373	16.1802	1.20158e-07	1.61012e-06	8.27938
440456	ENSG00000291117	PLEKHM1P1	pleckstrin homology and RUN domain containing M1 pseudogene 1	2.89869	2.77554	16.1574	1.21553e-07	1.62346e-06	8.43988
255967	ENSG00000152520	PAN3	poly(A) specific ribonuclease subunit PAN3	1.72849	4.36221	16.1525	1.21858e-07	1.62678e-06	8.28239
7483	ENSG00000143816	WNT9A	Wnt family member 9A	3.09923	2.39527	16.1401	1.22624e-07	1.63393e-06	8.41627
7745	ENSG00000198315	ZKSCAN8	zinc finger with KRAB and SCAN domains 8	2.18362	3.75388	16.136	1.22883e-07	1.63661e-06	8.3552
57337	ENSG00000138468	SENP7	SUMO specific peptidase 7	2.05986	3.77054	16.135	1.22946e-07	1.63669e-06	8.34715
6509	ENSG00000115902	SLC1A4	solute carrier family 1 member 4	1.60353	4.5409	16.1304	1.23235e-07	1.63899e-06	8.24696
80271	ENSG00000086544	ITPKC	inositol-trisphosphate 3-kinase C	1.42043	5.378	16.1243	1.23617e-07	1.64247e-06	8.1632
256987	ENSG00000164300	SERINC5	serine incorporator 5	1.52443	6.02408	16.1234	1.2367e-07	1.64247e-06	8.12246
5981	ENSG00000035928	RFC1	replication factor C subunit 1	1.35225	6.10875	16.1204	1.2386e-07	1.64271e-06	8.11375
7718	ENSG00000197279	ZNF165	zinc finger protein 165	2.02891	4.29231	16.1171	1.24071e-07	1.64395e-06	8.2822
5048	ENSG00000007168	PAFAH1B1	platelet activating factor acetylhydrolase 1b regulatory subunit 1	1.30082	6.83559	16.1103	1.24497e-07	1.64806e-06	8.07506
55768	ENSG00000151092	NGLY1	N-glycanase 1	1.5608	5.40769	16.1049	1.24839e-07	1.65028e-06	8.15335
116150	ENSG00000153989	NUS1	NUS1 dehydrodolichyl diphosphate synthase subunit	1.38824	5.55909	16.1025	1.24991e-07	1.65152e-06	8.13762
1213	ENSG00000141367	CLTC	clathrin heavy chain	1.20274	8.59624	16.0903	1.25775e-07	1.6602e-06	8.02068
90701	ENSG00000166562	SEC11C	SEC11 homolog C, signal peptidase complex subunit	1.279	6.19152	16.0565	1.27961e-07	1.68554e-06	8.07329
54625	ENSG00000173193	PARP14	poly(ADP-ribose) polymerase family member 14	2.22846	3.09662	16.051	1.28321e-07	1.68924e-06	8.36534
51008	ENSG00000138303	ASCC1	activating signal cointegrator 1 complex subunit 1	1.40649	5.29223	16.0441	1.28775e-07	1.69303e-06	8.12551
55578	ENSG00000102710	SUPT20H	SPT20 homolog, SAGA complex component	1.88394	4.80074	16.0439	1.28788e-07	1.69303e-06	8.18224
9749	ENSG00000112419	PHACTR2	phosphatase and actin regulator 2	1.76795	4.1764	16.0373	1.2922e-07	1.69792e-06	8.24102
51315	ENSG00000172086	KRCC1	lysine rich coiled-coil 1	1.43788	4.99796	16.0344	1.29409e-07	1.69955e-06	8.14556
25938	ENSG00000129493	HEATR5A	HEAT repeat containing 5A	1.68514	4.28923	16.0261	1.29966e-07	1.70393e-06	8.21961
91947	ENSG00000140450	ARRDC4	arrestin domain containing 4	1.7022	4.51751	16.0258	1.29983e-07	1.70393e-06	8.19558
10097	ENSG00000138071	ACTR2	actin related protein 2	1.38605	5.77319	16.0219	1.30242e-07	1.70441e-06	8.07912
58528	ENSG00000025039	RRAGD	Ras related GTP binding D	1.73758	5.00399	16.0184	1.30478e-07	1.70529e-06	8.1441
389337	ENSG00000183111	ARHGEF37	Rho guanine nucleotide exchange factor 37	1.69826	5.20745	16.0122	1.30888e-07	1.70798e-06	8.12169
8565	ENSG00000134684	YARS1	tyrosyl-tRNA synthetase 1	1.20667	8.72596	16.0002	1.31695e-07	1.71613e-06	7.96879
7453	ENSG00000140105	WARS1	tryptophanyl-tRNA synthetase 1	1.22441	7.99918	15.9964	1.31954e-07	1.71794e-06	7.97884
389434	ENSG00000009765	IYD	iodotyrosine deiodinase	2.60463	2.64598	15.994	1.32113e-07	1.71864e-06	8.35712
123606	ENSG00000170113	NIPA1	NIPA magnesium transporter 1	1.67391	4.58193	15.9933	1.3216e-07	1.71864e-06	8.1702
6097	ENSG00000143365	RORC	RAR related orphan receptor C	1.36343	5.33686	15.9922	1.32235e-07	1.71864e-06	8.0926
84102	ENSG00000136052	SLC41A2	solute carrier family 41 member 2	2.48258	2.81121	15.992	1.3225e-07	1.71864e-06	8.3525
285755	ENSG00000185250	PPIL6	peptidylprolyl isomerase like 6	2.24512	3.80824	15.9907	1.32342e-07	1.71906e-06	8.27283
4289	ENSG00000128585	MKLN1	muskelin 1	1.3603	5.66683	15.9693	1.33801e-07	1.73324e-06	8.05627
3667	ENSG00000169047	IRS1	insulin receptor substrate 1	4.97244	3.27339	15.9655	1.34059e-07	1.7358e-06	8.33492
7011	ENSG00000129566	TEP1	telomerase associated protein 1	1.50009	4.94331	15.9525	1.34961e-07	1.74614e-06	8.10694
9169	ENSG00000139218	SCAF11	SR-related CTD associated factor 11	1.29017	6.58437	15.9522	1.34981e-07	1.74614e-06	7.99734
10486	ENSG00000112186	CAP2	cyclase associated actin cytoskeleton regulatory protein 2	2.70984	4.43639	15.947	1.3534e-07	1.74861e-06	8.201
5885	ENSG00000164754	RAD21	RAD21 cohesin complex component	1.47549	6.41337	15.9461	1.35404e-07	1.74861e-06	8.00371
9849	ENSG00000177853	ZNF518A	zinc finger protein 518A	1.74407	4.85261	15.9452	1.35464e-07	1.74861e-06	8.11879
389072	ENSG00000178385	PLEKHM3	pleckstrin homology domain containing M3	2.11224	3.82416	15.945	1.3548e-07	1.74861e-06	8.24151
84193	ENSG00000183576	SETD3	SET domain containing 3, actin N3(tau)-histidine methyltransferase	1.27614	6.40117	15.9424	1.35658e-07	1.75011e-06	7.99985
55623	ENSG00000066654	THUMPD1	THUMP domain containing 1	1.54126	5.71669	15.9352	1.36162e-07	1.75571e-06	8.03724
7975	ENSG00000198517	MAFK	MAF bZIP transcription factor K	2.45363	5.3797	15.9345	1.36215e-07	1.75571e-06	8.08611
5873	ENSG00000069974	RAB27A	RAB27A, member RAS oncogene family	2.34229	3.24885	15.9265	1.36772e-07	1.76209e-06	8.29279
220963	ENSG00000165449	SLC16A9	solute carrier family 16 member 9	2.08064	3.5696	15.921	1.37162e-07	1.76377e-06	8.25319
83850	ENSG00000158220	ESYT3	extended synaptotagmin 3	2.78121	2.55553	15.9206	1.37193e-07	1.76377e-06	8.31897
57599	ENSG00000114742	WDR48	WD repeat domain 48	1.97175	4.98896	15.9203	1.37213e-07	1.76377e-06	8.09871
2537	ENSG00000126709	IFI6	interferon alpha inducible protein 6	2.00788	4.60034	15.9149	1.3759e-07	1.76781e-06	8.13832
51444	ENSG00000134758	RNF138	ring finger protein 138	1.58074	4.6979	15.9098	1.37957e-07	1.77093e-06	8.10954
79924	ENSG00000128165	ADM2	adrenomedullin 2	1.51074	5.22994	15.8926	1.39184e-07	1.78265e-06	8.04902
259173	ENSG00000178038	ALS2CL	ALS2 C-terminal like	1.49464	4.90071	15.8882	1.39499e-07	1.78588e-06	8.07533
57037	ENSG00000106524	ANKMY2	ankyrin repeat and MYND domain containing 2	1.93682	3.99945	15.8698	1.4083e-07	1.79806e-06	8.17572
647135	ENSG00000196369	SRGAP2B	SLIT-ROBO Rho GTPase activating protein 2B	3.16615	3.03085	15.864	1.41248e-07	1.80015e-06	8.28746
3796	ENSG00000068796	KIF2A	kinesin family member 2A	1.53277	5.04482	15.8516	1.4216e-07	1.80933e-06	8.04259
23390	ENSG00000186908	ZDHHC17	zinc finger DHHC-type palmitoyltransferase 17	1.66486	4.44535	15.8501	1.42266e-07	1.80988e-06	8.10551
5305	ENSG00000150867	PIP4K2A	phosphatidylinositol-5-phosphate 4-kinase type 2 alpha	2.06351	4.37949	15.8447	1.42663e-07	1.81134e-06	8.1245
137075	ENSG00000253958	CLDN23	claudin 23	2.5855	3.16806	15.8423	1.42843e-07	1.81134e-06	8.25891
11343	ENSG00000074416	MGLL	monoglyceride lipase	2.0002	4.14354	15.842	1.42863e-07	1.81134e-06	8.14676
1998	ENSG00000109381	ELF2	E74 like ETS transcription factor 2	1.85251	4.19466	15.8415	1.42905e-07	1.81134e-06	8.13518
329	ENSG00000110330	BIRC2	baculoviral IAP repeat containing 2	2.18514	5.21522	15.8411	1.4293e-07	1.81134e-06	8.04038
[truncated: 2,802 more rows]

## Sheet: Sheet3
ENTREZID	ENSEMBL	SYMBOL	GENENAME	logFC	AveExpr	t	P.Value	adj.P.Val	B
[truncated: 3,353 more rows]

[truncated: 5 more sheets: Sheet4, Sheet5, Sheet6, Sheet7, Sheet8]
